# Supplementary material
Source: publisher figshare collection journal article supplement (https://acs.figshare.com/ndownloader/files/18064346)

# checkCIF/PLATON report

You have not supplied any structure factors. As a result the full set of tests cannot be run.

THIS REPORT IS FOR GUIDANCE ONLY. IF USED AS PART OF A REVIEW PROCEDURE FOR PUBLICATION, IT SHOULD NOT REPLACE THE EXPERTISE OF AN EXPERIENCED CRYSTALLOGRAPHIC REFEREE.

No syntax errors found.      CIF dictionary      Interpreting this report

## Datablock: NKU-FlexMOF-1a-C2H6

---

|                 |                        |                                |
|-----------------|------------------------|--------------------------------|
| Bond precision: | C-C = 0.0092 A         | Wavelength=1.54178             |
| Cell:           | a=10.4890(3)           | b=10.4486(4)      c=15.1078(7) |
|                 | alpha=90               | beta=106.787(4)      gamma=90  |
| Temperature:    | 298 K                  |                                |
|                 | Calculated             | Reported                       |
| Volume          | 1585.19(11)            | 1585.18(11)                    |
| Space group     | P 21/c                 | P 1 21/c 1                     |
| Hall group      | -P 2ybc                | -P 2ybc                        |
| Moiety formula  | 4(C13 H6 Cu F N O4), C | C13 H6 Cu F N O4, 0.13(C2)     |
| Sum formula     | C53 H24 Cu4 F4 N4 O16  | C53 H24 Cu4 F4 N4 O16          |
| Mr              | 1302.96                | 1302.96                        |
| Dx,g cm-3       | 1.365                  | 1.365                          |
| Z               | 1                      | 1                              |
| Mu (mm-1)       | 2.158                  | 2.158                          |
| F000            | 650.0                  | 650.0                          |
| F000'           | 644.18                 |                                |
| h,k,lmax        | 13,13,18               | 13,12,18                       |
| Nref            | 3226                   | 3125                           |
| Tmin,Tmax       | 0.712,0.806            | 0.067,1.000                    |
| Tmin'           | 0.619                  |                                |

Correction method= # Reported T Limits: Tmin=0.067 Tmax=1.000  
AbsCorr = NONE

Data completeness= 0.969      Theta(max)= 74.178

R(reflections)= 0.1056( 2400)      wR2(reflections)= 0.3176( 3125)

S = 1.235      Npar= 199

---

The following ALERTS were generated. Each ALERT has the format

**test-name\_ALERT\_alert-type\_alert-level.**

Click on the hyperlinks for more details of the test.

---

### Alert level B

|                                                                    |          |
|--------------------------------------------------------------------|----------|
| PLAT315_ALERT_2_B Singly Bonded Carbon Detected (H-atoms Missing). | C1 Check |
| PLAT315_ALERT_2_B Singly Bonded Carbon Detected (H-atoms Missing). | C2 Check |

---

### Alert level C

ABSTY03\_ALERT\_1\_C The \_exptl\_absorpt\_correction\_type has been given as none.  
However values have been given for Tmin and Tmax. Remove  
these if an absorption correction has not been applied.

From the CIF: \_exptl\_absorpt\_correction\_T\_min 0.067  
From the CIF: \_exptl\_absorpt\_correction\_T\_max 1.000

|                                                                  |              |
|------------------------------------------------------------------|--------------|
| PLAT057_ALERT_3_C Correction for Absorption Required RT(exp) ... | 1.13 Do !    |
| PLAT082_ALERT_2_C High R1 Value .....                            | 0.11 Report  |
| PLAT084_ALERT_3_C High wR2 Value (i.e. > 0.25) .....             | 0.32 Report  |
| PLAT341_ALERT_3_C Low Bond Precision on C-C Bonds .....          | 0.00923 Ang. |

---

### Alert level G

FORMU01\_ALERT\_1\_G There is a discrepancy between the atom counts in the  
\_chemical\_formula\_sum and \_chemical\_formula\_moiety. This is  
usually due to the moiety formula being in the wrong format.  
Atom count from \_chemical\_formula\_sum: C53 H24 Cu4 F4 N4 O16  
Atom count from \_chemical\_formula\_moiety: C13.26 H6 Cu1 F1 N1 O4

|                                                                    |              |
|--------------------------------------------------------------------|--------------|
| PLAT003_ALERT_2_G Number of Uiso or Uij Restrained non-H Atoms ... | 15 Report    |
| PLAT004_ALERT_5_G Polymeric Structure Found with Maximum Dimension | 3 Info       |
| PLAT042_ALERT_1_G Calc. and Reported MoietyFormula Strings Differ  | Please Check |
| PLAT072_ALERT_2_G SHELXL First Parameter in WGHT Unusually Large   | 0.20 Report  |
| PLAT178_ALERT_4_G The CIF-Embedded .res File Contains SIMU Records | 1 Report     |
| PLAT186_ALERT_4_G The CIF-Embedded .res File Contains ISOR Records | 1 Report     |
| PLAT300_ALERT_4_G Atom Site Occupancy of C1 Constrained at         | 0.125 Check  |
| PLAT300_ALERT_4_G Atom Site Occupancy of C2 Constrained at         | 0.125 Check  |
| PLAT302_ALERT_4_G Anion/Solvent/Minor-Residue Disorder (Resd 2 )   | 100% Note    |
| PLAT720_ALERT_4_G Number of Unusual/Non-Standard Labels .....      | 26 Note      |
| PLAT794_ALERT_5_G Tentative Bond Valency for Cu01 (II) .           | 2.14 Info    |
| PLAT860_ALERT_3_G Number of Least-Squares Restraints .....         | 306 Note     |

---

0 **ALERT level A** = Most likely a serious problem - resolve or explain  
2 **ALERT level B** = A potentially serious problem, consider carefully  
5 **ALERT level C** = Check. Ensure it is not caused by an omission or oversight  
13 **ALERT level G** = General information/check it is not something unexpected

3 ALERT type 1 CIF construction/syntax error, inconsistent or missing data  
5 ALERT type 2 Indicator that the structure model may be wrong or deficient  
4 ALERT type 3 Indicator that the structure quality may be low  
6 ALERT type 4 Improvement, methodology, query or suggestion  
2 ALERT type 5 Informative message, check

---

---

It is advisable to attempt to resolve as many as possible of the alerts in all categories. Often the minor alerts point to easily fixed oversights, errors and omissions in your CIF or refinement strategy, so attention to these fine details can be worthwhile. In order to resolve some of the more serious problems it may be necessary to carry out additional measurements or structure refinements. However, the purpose of your study may justify the reported deviations and the more serious of these should normally be commented upon in the discussion or experimental section of a paper or in the "special\_details" fields of the CIF. checkCIF was carefully designed to identify outliers and unusual parameters, but every test has its limitations and alerts that are not important in a particular case may appear. Conversely, the absence of alerts does not guarantee there are no aspects of the results needing attention. It is up to the individual to critically assess their own results and, if necessary, seek expert advice.

### **Publication of your CIF in IUCr journals**

A basic structural check has been run on your CIF. These basic checks will be run on all CIFs submitted for publication in IUCr journals (*Acta Crystallographica*, *Journal of Applied Crystallography*, *Journal of Synchrotron Radiation*); however, if you intend to submit to *Acta Crystallographica Section C* or *E* or *IUCrData*, you should make sure that full publication checks are run on the final version of your CIF prior to submission.

### **Publication of your CIF in other journals**

Please refer to the *Notes for Authors* of the relevant journal for any special instructions relating to CIF submission.

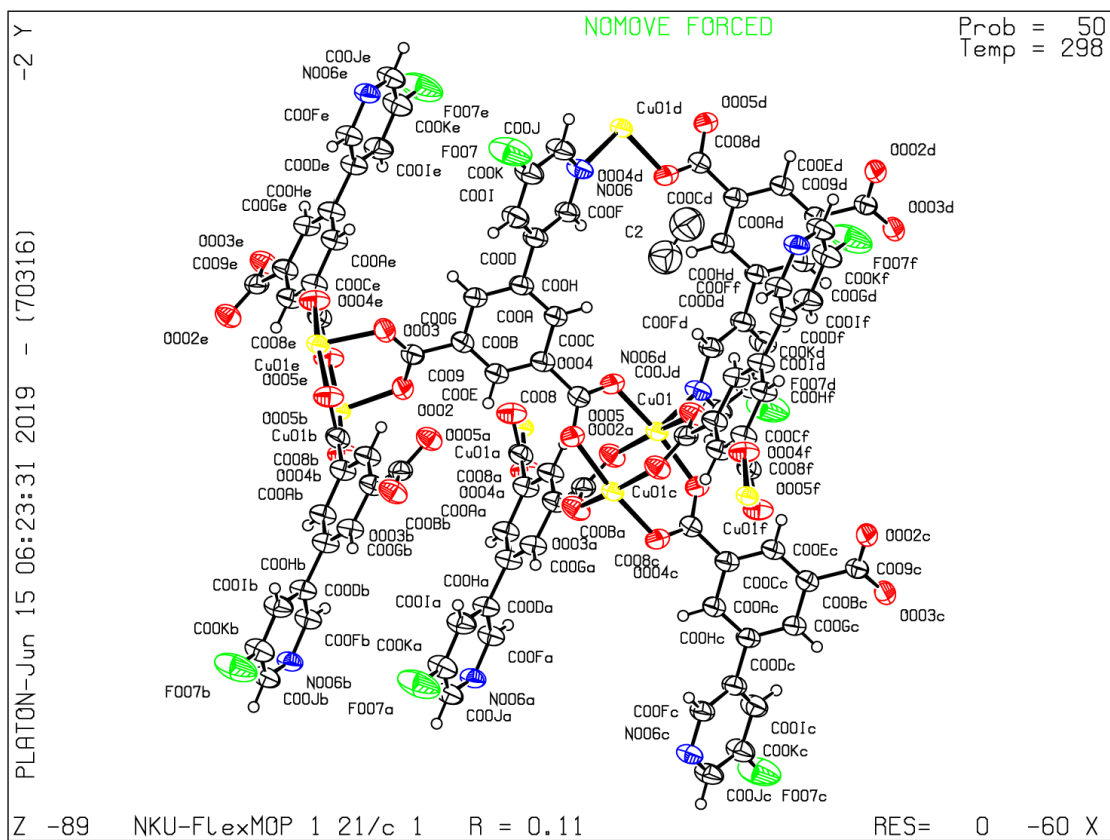

Supplement: Supplementary file 1 [file 18064346 › NKU-FlexMOF-1a-C2H6-checkcif.pdf]
