# Supplementary material
Source: publisher figshare collection journal article supplement (https://acs.figshare.com/ndownloader/files/18064346)

# checkCIF/PLATON report

You have not supplied any structure factors. As a result the full set of tests cannot be run.

THIS REPORT IS FOR GUIDANCE ONLY. IF USED AS PART OF A REVIEW PROCEDURE FOR PUBLICATION, IT SHOULD NOT REPLACE THE EXPERTISE OF AN EXPERIENCED CRYSTALLOGRAPHIC REFEREE.

No syntax errors found.      CIF dictionary      Interpreting this report

## Datablock: NUM-10a-N2-a

---

|                 |                        |                              |
|-----------------|------------------------|------------------------------|
| Bond precision: | C-C = 0.0082 Å         | Wavelength=0.71073           |
| Cell:           | a=10.488(2)            | b=10.412(2)      c=15.057(3) |
|                 | alpha=90               | beta=107.13(3)      gamma=90 |
| Temperature:    | 100 K                  |                              |
|                 | Calculated             | Reported                     |
| Volume          | 1571.3(6)              | 1571.3(6)                    |
| Space group     | P 21/c                 | P 1 21/c 1                   |
| Hall group      | -P 2ybc                | -P 2ybc                      |
| Moiety formula  | 4(C13 H6 Cu F N O4), N | C13 H6 Cu F N O4, 0.13(N2)   |
| Sum formula     | C52 H24 Cu4 F4 N5 O16  | C52 H24 Cu4 F4 N5 O16        |
| Mr              | 1304.96                | 1304.96                      |
| Dx,g cm-3       | 1.379                  | 1.379                        |
| Z               | 1                      | 1                            |
| Mu (mm-1)       | 1.410                  | 1.410                        |
| F000            | 651.0                  | 651.0                        |
| F000'           | 652.60                 |                              |
| h,k,lmax        | 14,14,20               | 0,0,0                        |
| Nref            | 4246                   | 3807                         |
| Tmin,Tmax       | 0.754,0.856            |                              |
| Tmin'           | 0.754                  |                              |

Correction method= Not given

Data completeness= 0.897      Theta(max)= 29.173

R(reflections)= 0.0756( 3340)      wR2(reflections)= 0.2517( 3807)

S = 1.109      Npar= 199

---

The following ALERTS were generated. Each ALERT has the format  
**test-name\_ALERT\_alert-type\_alert-level.**  
Click on the hyperlinks for more details of the test.

---

## Alert level A

PLAT029\_ALERT\_3\_A \_diffrn\_measured\_fraction\_theta\_full value Low . 0.925 Why?

---

## Alert level B

REFLL01\_ALERT\_1\_B The minimum h value cannot exceed the maximum h value

Minimum h value = \*\*\*\*\*

Maximum h value = 0

REFLL01\_ALERT\_1\_B The minimum k value cannot exceed the maximum k value

Minimum k value = \*\*\*\*\*

Maximum k value = 0

REFLL01\_ALERT\_1\_B The minimum l value cannot exceed the maximum l value

Minimum l value = \*\*\*\*\*

Maximum l value = \*\*\*\*\*

---

## Alert level C

PLAT057\_ALERT\_3\_C Correction for Absorption Required RT(exp) ... 1.14 Do !

PLAT260\_ALERT\_2\_C Large Average Ueq of Residue Including N13 0.102 Check

PLAT341\_ALERT\_3\_C Low Bond Precision on C-C Bonds ..... 0.00815 Ang.

---

## Alert level G

FORMU01\_ALERT\_1\_G There is a discrepancy between the atom counts in the  
\_chemical\_formula\_sum and \_chemical\_formula\_moiety. This is  
usually due to the moiety formula being in the wrong format.

Atom count from \_chemical\_formula\_sum: C52 H24 Cu4 F4 N5 O16

Atom count from \_chemical\_formula\_moiety: C13 H6 Cu1 F1 N1.26 O4

|                   |                                                  |       |              |
|-------------------|--------------------------------------------------|-------|--------------|
| PLAT002_ALERT_2_G | Number of Distance or Angle Restraints on AtSite | 2     | Note         |
| PLAT003_ALERT_2_G | Number of Uiso or Uij Restrained non-H Atoms ... | 2     | Report       |
| PLAT004_ALERT_5_G | Polymeric Structure Found with Maximum Dimension | 3     | Info         |
| PLAT012_ALERT_1_G | No _shelx_res_checksum Found in CIF .....        |       | Please Check |
| PLAT042_ALERT_1_G | Calc. and Reported MoietyFormula Strings Differ  |       | Please Check |
| PLAT072_ALERT_2_G | SHELXL First Parameter in WGHT Unusually Large   | 0.12  | Report       |
| PLAT172_ALERT_4_G | The CIF-Embedded .res File Contains DFIX Records | 1     | Report       |
| PLAT178_ALERT_4_G | The CIF-Embedded .res File Contains SIMU Records | 1     | Report       |
| PLAT186_ALERT_4_G | The CIF-Embedded .res File Contains ISOR Records | 1     | Report       |
| PLAT300_ALERT_4_G | Atom Site Occupancy of N13 Constrained at        | 0.125 | Check        |
| PLAT300_ALERT_4_G | Atom Site Occupancy of N14 Constrained at        | 0.125 | Check        |
| PLAT302_ALERT_4_G | Anion/Solvent/Minor-Residue Disorder (Resd 2 )   | 100%  | Note         |
| PLAT764_ALERT_4_G | Overcomplete CIF Bond List Detected (Rep/Expd) . | 1.19  | Ratio        |
| PLAT794_ALERT_5_G | Tentative Bond Valency for Cu1 (II) .            | 2.19  | Info         |
| PLAT860_ALERT_3_G | Number of Least-Squares Restraints .....         | 19    | Note         |
| PLAT881_ALERT_1_G | No Datum for _diffrn_reflns_av_R_equivalents ... |       | Please Do !  |
| PLAT883_ALERT_1_G | No Info/Value for _atom_sites_solution_primary . |       | Please Do !  |
| PLAT950_ALERT_5_G | Calculated (ThMax) and CIF-Reported Hmax Differ  | 14    | Units        |
| PLAT951_ALERT_5_G | Calculated (ThMax) and CIF-Reported Kmax Differ  | 14    | Units        |
| PLAT952_ALERT_5_G | Calculated (ThMax) and CIF-Reported Lmax Differ  | 20    | Units        |

---

- 1 **ALERT level A** = Most likely a serious problem - resolve or explain  
3 **ALERT level B** = A potentially serious problem, consider carefully  
3 **ALERT level C** = Check. Ensure it is not caused by an omission or oversight  
21 **ALERT level G** = General information/check it is not something unexpected

- 8 ALERT type 1 CIF construction/syntax error, inconsistent or missing data  
4 ALERT type 2 Indicator that the structure model may be wrong or deficient  
4 ALERT type 3 Indicator that the structure quality may be low  
7 ALERT type 4 Improvement, methodology, query or suggestion  
5 ALERT type 5 Informative message, check
-

It is advisable to attempt to resolve as many as possible of the alerts in all categories. Often the minor alerts point to easily fixed oversights, errors and omissions in your CIF or refinement strategy, so attention to these fine details can be worthwhile. In order to resolve some of the more serious problems it may be necessary to carry out additional measurements or structure refinements. However, the purpose of your study may justify the reported deviations and the more serious of these should normally be commented upon in the discussion or experimental section of a paper or in the "special\_details" fields of the CIF. checkCIF was carefully designed to identify outliers and unusual parameters, but every test has its limitations and alerts that are not important in a particular case may appear. Conversely, the absence of alerts does not guarantee there are no aspects of the results needing attention. It is up to the individual to critically assess their own results and, if necessary, seek expert advice.

### **Publication of your CIF in IUCr journals**

A basic structural check has been run on your CIF. These basic checks will be run on all CIFs submitted for publication in IUCr journals (*Acta Crystallographica*, *Journal of Applied Crystallography*, *Journal of Synchrotron Radiation*); however, if you intend to submit to *Acta Crystallographica Section C* or *E* or *IUCrData*, you should make sure that full publication checks are run on the final version of your CIF prior to submission.

### **Publication of your CIF in other journals**

Please refer to the *Notes for Authors* of the relevant journal for any special instructions relating to CIF submission.

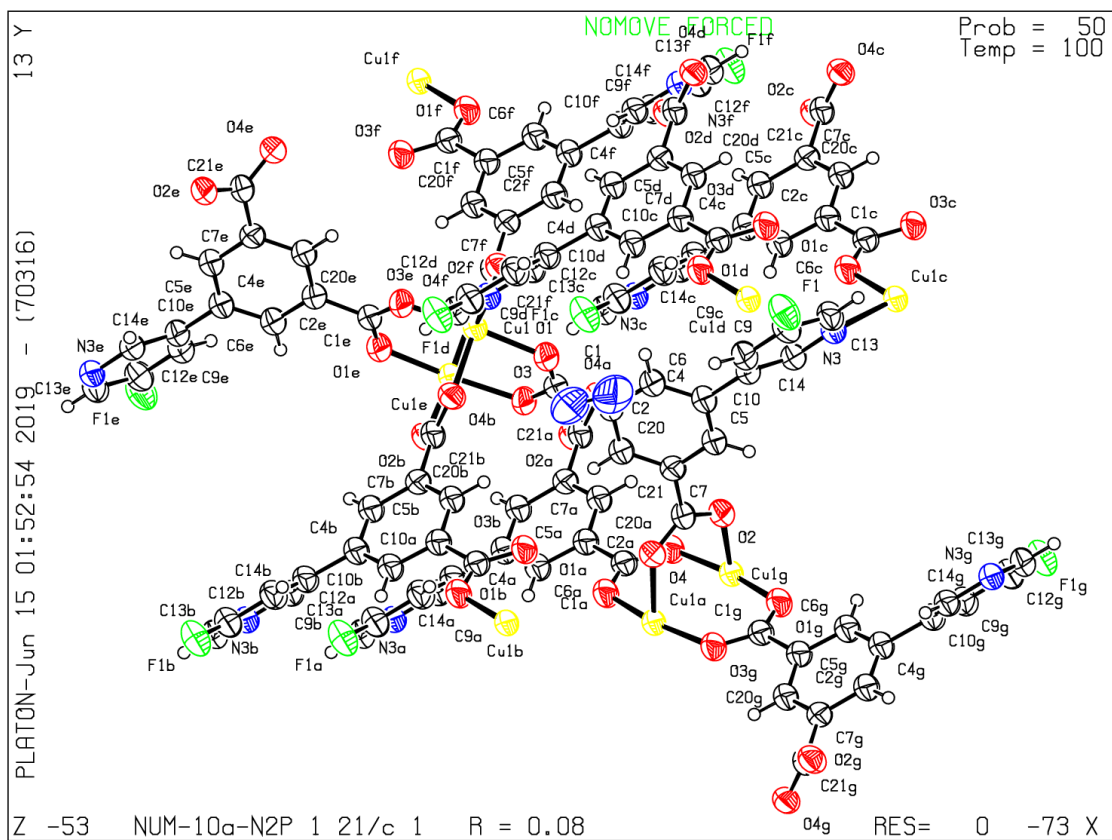

Supplement: Supplementary file 1 [file 18064346 › NKU-FlexMOF-1a-N2-a-checkcif.pdf]
