# Supplementary material
Source: publisher figshare collection journal article supplement (https://acs.figshare.com/ndownloader/files/18064346)
Supplement: Supplementary file 1 [file 18064346]

Archive with 14 entries (14 files):
- NKU-FlexMOF-1-checkcif.pdf
- NKU-FlexMOF-1.cif
- NKU-FlexMOF-1a-C2H6-checkcif.pdf
- NKU-FlexMOF-1a-C2H6.cif
- NKU-FlexMOF-1a-C3H8-checkcif.pdf
- NKU-FlexMOF-1a-C3H8.cif
- NKU-FlexMOF-1a-CO2-checkcif.pdf
- NKU-FlexMOF-1a-CO2.cif
- NKU-FlexMOF-1a-N2-a-checkcif.pdf
- NKU-FlexMOF-1a-N2-a.cif
- NKU-FlexMOF-1a-N2-b-checkcif.pdf
- NKU-FlexMOF-1a-N2-b.cif
- NKU-FlexMOF-1a-checkcif.pdf
- NKU-FlexMOF-1a.cif
