# Supplementary material
Source: publisher figshare collection journal article supplement (https://acs.figshare.com/ndownloader/files/18064346)
Supplement: Supplementary file 1 [file 18064346 › NKU-FlexMOF-1.cif]

data_NKU-FlexMOF-1
_audit_creation_date               2018-11-22
_audit_creation_method
;
Olex2 1.2
(compiled 2018.05.29 svn.r3508 for OlexSys, GUI svn.r5506)
;
_shelx_SHELXL_version_number       '2014/7'
_audit_contact_author_address      ?
_audit_contact_author_email        ?
_audit_contact_author_name         ''
_audit_contact_author_phone        ?
_publ_contact_author_id_orcid      ?
_publ_section_references
;
Dolomanov, O.V., Bourhis, L.J., Gildea, R.J, Howard, J.A.K. & Puschmann, H.
 (2009), J. Appl. Cryst. 42, 339-341.

Sheldrick, G.M. (2015). Acta Cryst. C71, 3-8.
;
_chemical_name_common              ?
_chemical_name_systematic          ?
_chemical_formula_moiety           'C13 H6 Cu F N O4, C3 H7 N O'
_chemical_formula_sum              'C16 H13 Cu F N2 O5'
_chemical_formula_weight           395.82
_chemical_melting_point            ?
loop_
  _atom_type_symbol
  _atom_type_description
  _atom_type_scat_dispersion_real
  _atom_type_scat_dispersion_imag
  _atom_type_scat_source
 'C' 'C' 0.0033 0.0016 'International Tables Vol C Tables 4.2.6.8 and 6.1.1.4'
 'H' 'H' 0.0000 0.0000 'International Tables Vol C Tables 4.2.6.8 and 6.1.1.4'
 'Cu' 'Cu' 0.3201 1.2651 'International Tables Vol C Tables 4.2.6.8 and 6.1.1.4'
 'F' 'F' 0.0171 0.0103 'International Tables Vol C Tables 4.2.6.8 and 6.1.1.4'
 'N' 'N' 0.0061 0.0033 'International Tables Vol C Tables 4.2.6.8 and 6.1.1.4'
 'O' 'O' 0.0106 0.0060 'International Tables Vol C Tables 4.2.6.8 and 6.1.1.4'

_shelx_space_group_comment
;
The symmetry employed for this shelxl refinement is uniquely defined
by the following loop, which should always be used as a source of
symmetry information in preference to the above space-group names.
They are only intended as comments.
;
_space_group_crystal_system        'monoclinic'
_space_group_IT_number             14
_space_group_name_H-M_alt          'P 1 21/c 1'
_space_group_name_Hall             '-P 2ybc'
loop_
  _space_group_symop_operation_xyz
 'x, y, z'
 '-x, y+1/2, -z+1/2'
 '-x, -y, -z'
 'x, -y-1/2, z-1/2'

_cell_length_a                     10.551(2)
_cell_length_b                     11.001(2)
_cell_length_c                     14.830(3)
_cell_angle_alpha                  90
_cell_angle_beta                   108.79(3)
_cell_angle_gamma                  90
_cell_volume                       1629.7(6)
_cell_formula_units_Z              4
_cell_measurement_reflns_used      13889
_cell_measurement_temperature      298(2)
_cell_measurement_theta_max        27.6
_cell_measurement_theta_min        3.4
_shelx_estimated_absorpt_T_max     0.874
_shelx_estimated_absorpt_T_min     0.820
_exptl_absorpt_coefficient_mu      1.381
_exptl_absorpt_correction_T_max    ?
_exptl_absorpt_correction_T_min    ?
_exptl_absorpt_correction_type     'none'
_exptl_absorpt_process_details     ?
_exptl_absorpt_special_details     ?
_exptl_crystal_colour              blue
_exptl_crystal_colour_primary      blue
_exptl_crystal_density_diffrn      1.613
_exptl_crystal_density_meas        ?
_exptl_crystal_density_method      'not measured'
_exptl_crystal_description         Prism
_exptl_crystal_F_000               804
_exptl_crystal_size_max            0.15
_exptl_crystal_size_mid            0.13
_exptl_crystal_size_min            0.1
_exptl_transmission_factor_max     ?
_exptl_transmission_factor_min     ?
_diffrn_reflns_av_R_equivalents    0.1092
_diffrn_reflns_av_unetI/netI       0.0917
_diffrn_reflns_Laue_measured_fraction_full  0.998
_diffrn_reflns_Laue_measured_fraction_max  0.998
_diffrn_reflns_limit_h_max         13
_diffrn_reflns_limit_h_min         -13
_diffrn_reflns_limit_k_max         14
_diffrn_reflns_limit_k_min         -14
_diffrn_reflns_limit_l_max         19
_diffrn_reflns_limit_l_min         -19
_diffrn_reflns_number              16743
_diffrn_reflns_point_group_measured_fraction_full  0.998
_diffrn_reflns_point_group_measured_fraction_max  0.998
_diffrn_reflns_theta_full          25.242
_diffrn_reflns_theta_max           27.482
_diffrn_reflns_theta_min           3.406
_diffrn_ambient_temperature        298(2)
_diffrn_detector_area_resol_mean   ?
_diffrn_measured_fraction_theta_full  0.998
_diffrn_measured_fraction_theta_max  0.998
_diffrn_measurement_device_type    'Bruker P4'
_diffrn_measurement_method         '\w scans'
_diffrn_radiation_monochromator    'graphite'
_diffrn_radiation_type             MoK\a
_diffrn_radiation_wavelength       0.71073
_diffrn_source                     ?
_reflns_Friedel_coverage           0.000
_reflns_Friedel_fraction_full      .
_reflns_Friedel_fraction_max       .
_reflns_number_gt                  2636
_reflns_number_total               3730
_reflns_special_details
;
 Reflections were merged by SHELXL according to the crystal
 class for the calculation of statistics and refinement.
 
 _reflns_Friedel_fraction is defined as the number of unique
 Friedel pairs measured divided by the number that would be
 possible theoretically, ignoring centric projections and
 systematic absences.
;
_reflns_threshold_expression       'I > 2\s(I)'
_computing_cell_refinement         ?
_computing_data_collection         ?
_computing_data_reduction          ?
_computing_molecular_graphics      'Olex2 (Dolomanov et al., 2009)'
_computing_publication_material    'Olex2 (Dolomanov et al., 2009)'
_computing_structure_refinement    'ShelXL (Sheldrick, 2015)'
_computing_structure_solution      ?
_refine_diff_density_max           0.929
_refine_diff_density_min           -0.490
_refine_diff_density_rms           0.107
_refine_ls_extinction_coef         .
_refine_ls_extinction_method       none
_refine_ls_goodness_of_fit_ref     1.131
_refine_ls_hydrogen_treatment      constr
_refine_ls_matrix_type             full
_refine_ls_number_parameters       228
_refine_ls_number_reflns           3730
_refine_ls_number_restraints       0
_refine_ls_R_factor_all            0.1177
_refine_ls_R_factor_gt             0.0741
_refine_ls_restrained_S_all        1.131
_refine_ls_shift/su_max            0.001
_refine_ls_shift/su_mean           0.000
_refine_ls_structure_factor_coef   Fsqd
_refine_ls_weighting_details      
 'w=1/[\s^2^(Fo^2^)+(0.0465P)^2^+2.0557P] where P=(Fo^2^+2Fc^2^)/3'
_refine_ls_weighting_scheme        calc
_refine_ls_wR_factor_gt            0.1244
_refine_ls_wR_factor_ref           0.1361
_refine_special_details            ?
_olex2_refinement_description
;
1. Fixed Uiso
 At 1.2 times of:
  All C(H) groups
 At 1.5 times of:
  All C(H,H,H) groups
2.a Aromatic/amide H refined with riding coordinates:
 C3(H3), C6(H6), C8(H8), C10(H10), C12(H12), C13(H13), C15(H15)
2.b Idealised Me refined as rotating group:
 C14(H14A,H14B,H14C), C16(H16A,H16B,H16C)
;
_atom_sites_solution_hydrogens     geom
_atom_sites_solution_primary       ?
_atom_sites_solution_secondary     ?
loop_
  _atom_site_label
  _atom_site_type_symbol
  _atom_site_fract_x
  _atom_site_fract_y
  _atom_site_fract_z
  _atom_site_U_iso_or_equiv
  _atom_site_adp_type
  _atom_site_occupancy
  _atom_site_site_symmetry_order
  _atom_site_calc_flag
  _atom_site_refinement_flags_posn
  _atom_site_refinement_flags_adp
  _atom_site_refinement_flags_occupancy
  _atom_site_disorder_assembly
  _atom_site_disorder_group
 Cu1 Cu 0.59556(5) 1.08193(5) 1.01338(4) 0.01662(17) Uani 1 1 d . . . . .
 O1 O 0.6915(3) 0.9627(3) 0.9600(2) 0.0264(8) Uani 1 1 d . . . . .
 O2 O 0.5219(3) 0.8294(3) 0.9274(2) 0.0267(8) Uani 1 1 d . . . . .
 O3 O 0.5238(3) 0.6260(3) 0.6156(2) 0.0272(8) Uani 1 1 d . . . . .
 O4 O 0.6882(3) 0.4902(3) 0.6382(2) 0.0243(8) Uani 1 1 d . . . . .
 O5 O 0.0074(10) 0.8006(8) 0.6694(6) 0.153(4) Uani 1 1 d . . . . .
 C1 C 0.6346(4) 0.8638(4) 0.9269(3) 0.0192(10) Uani 1 1 d . . . . .
 C2 C 0.7090(4) 0.7804(4) 0.8811(3) 0.0202(10) Uani 1 1 d . . . . .
 C3 C 0.6415(4) 0.7199(4) 0.7981(3) 0.0203(10) Uani 1 1 d . . . . .
 H3 H 0.5506 0.7341 0.7691 0.024 Uiso 1 1 calc R . . . .
 C4 C 0.7070(4) 0.6381(4) 0.7571(3) 0.0205(10) Uani 1 1 d . . . . .
 C5 C 0.6344(4) 0.5793(5) 0.6637(3) 0.0210(10) Uani 1 1 d . . . . .
 C6 C 0.8426(4) 0.6156(4) 0.8019(3) 0.0219(11) Uani 1 1 d . . . . .
 H6 H 0.8859 0.5570 0.7772 0.026 Uiso 1 1 calc R . . . .
 C7 C 0.9137(4) 0.6794(4) 0.8827(3) 0.0212(10) Uani 1 1 d . . . . .
 C8 C 0.8461(4) 0.7620(4) 0.9226(3) 0.0226(11) Uani 1 1 d . . . . .
 H8 H 0.8930 0.8049 0.9772 0.027 Uiso 1 1 calc R . . . .
 C9 C 1.0627(4) 0.6638(4) 0.9254(3) 0.0214(10) Uani 1 1 d . . . . .
 C10 C 1.1223(5) 0.5508(4) 0.9391(4) 0.0305(13) Uani 1 1 d . . . . .
 H10 H 1.0721 0.4798 0.9239 0.037 Uiso 1 1 calc R . . . .
 C11 C 1.2605(5) 0.5481(5) 0.9766(4) 0.0368(14) Uani 1 1 d . . . . .
 C12 C 1.3349(5) 0.6520(5) 0.9979(4) 0.0326(13) Uani 1 1 d . . . . .
 H12 H 1.4275 0.6463 1.0244 0.039 Uiso 1 1 calc R . . . .
 C13 C 1.1442(4) 0.7656(4) 0.9479(3) 0.0230(11) Uani 1 1 d . . . . .
 H13 H 1.1035 0.8416 0.9389 0.028 Uiso 1 1 calc R . . . .
 C14 C 0.2956(10) 0.6095(13) 0.7504(7) 0.151(6) Uani 1 1 d . . . . .
 H14A H 0.3464 0.6770 0.7848 0.226 Uiso 1 1 calc GR . . . .
 H14B H 0.3326 0.5835 0.7024 0.226 Uiso 1 1 calc GR . . . .
 H14C H 0.2993 0.5437 0.7937 0.226 Uiso 1 1 calc GR . . . .
 C15 C 0.1258(17) 0.7604(11) 0.7071(8) 0.133(5) Uani 1 1 d . . . . .
 H15 H 0.1937 0.8148 0.7372 0.160 Uiso 1 1 calc R . . . .
 C16 C 0.0684(7) 0.5512(6) 0.6568(5) 0.065(2) Uani 1 1 d . . . . .
 H16A H -0.0220 0.5806 0.6331 0.098 Uiso 1 1 calc GR . . . .
 H16B H 0.0734 0.4853 0.7003 0.098 Uiso 1 1 calc GR . . . .
 H16C H 0.0955 0.5231 0.6045 0.098 Uiso 1 1 calc GR . . . .
 F1 F 1.3235(3) 0.4398(3) 0.9903(3) 0.0739(13) Uani 1 1 d . . . . .
 N1 N 1.2781(4) 0.7611(4) 0.9818(3) 0.0232(9) Uani 1 1 d . . . . .
 N2 N 0.1548(8) 0.6471(7) 0.7049(5) 0.077(2) Uani 1 1 d . . . . .

loop_
  _atom_site_aniso_label
  _atom_site_aniso_U_11
  _atom_site_aniso_U_22
  _atom_site_aniso_U_33
  _atom_site_aniso_U_23
  _atom_site_aniso_U_13
  _atom_site_aniso_U_12
 Cu1 0.0138(3) 0.0190(3) 0.0162(3) 0.0004(3) 0.00362(19) 0.0003(3)
 O1 0.0200(17) 0.031(2) 0.031(2) -0.0112(16) 0.0108(15) 0.0007(15)
 O2 0.0209(18) 0.029(2) 0.034(2) -0.0065(16) 0.0142(15) 0.0005(15)
 O3 0.0210(18) 0.036(2) 0.0203(18) -0.0093(15) 0.0011(14) 0.0052(15)
 O4 0.0178(17) 0.032(2) 0.0181(18) -0.0095(15) -0.0009(14) 0.0036(15)
 O5 0.208(10) 0.108(7) 0.117(7) 0.028(5) 0.017(6) 0.030(7)
 C1 0.017(2) 0.023(3) 0.016(2) -0.004(2) 0.0020(19) 0.001(2)
 C2 0.019(2) 0.022(3) 0.020(2) -0.001(2) 0.0069(19) -0.003(2)
 C3 0.010(2) 0.027(3) 0.021(2) -0.004(2) 0.0005(18) 0.000(2)
 C4 0.018(2) 0.026(3) 0.018(2) -0.005(2) 0.0053(19) -0.002(2)
 C5 0.015(2) 0.027(3) 0.020(2) -0.003(2) 0.0048(18) -0.007(2)
 C6 0.018(2) 0.027(3) 0.020(2) -0.009(2) 0.0047(19) -0.003(2)
 C7 0.014(2) 0.025(3) 0.024(3) -0.003(2) 0.0054(19) -0.001(2)
 C8 0.019(2) 0.025(3) 0.022(3) -0.007(2) 0.003(2) -0.003(2)
 C9 0.013(2) 0.028(3) 0.022(3) -0.004(2) 0.0035(19) -0.002(2)
 C10 0.023(3) 0.022(3) 0.044(3) 0.003(2) 0.007(2) -0.005(2)
 C11 0.027(3) 0.020(3) 0.061(4) 0.013(3) 0.011(3) 0.007(2)
 C12 0.015(3) 0.030(3) 0.046(3) 0.010(3) 0.002(2) 0.001(2)
 C13 0.019(2) 0.018(3) 0.029(3) -0.001(2) 0.004(2) 0.004(2)
 C14 0.079(7) 0.290(17) 0.098(8) -0.087(9) 0.048(6) -0.055(9)
 C15 0.265(18) 0.072(8) 0.071(7) -0.007(6) 0.066(10) -0.045(10)
 C16 0.084(5) 0.061(5) 0.061(5) -0.023(4) 0.038(4) -0.016(4)
 F1 0.035(2) 0.026(2) 0.153(4) 0.021(2) 0.020(2) 0.0070(16)
 N1 0.0136(19) 0.022(2) 0.030(2) 0.0056(18) 0.0024(17) 0.0014(17)
 N2 0.109(6) 0.078(5) 0.061(4) -0.022(4) 0.049(4) -0.027(5)

_geom_special_details
;
 All esds (except the esd in the dihedral angle between two l.s. planes)
 are estimated using the full covariance matrix.  The cell esds are taken
 into account individually in the estimation of esds in distances, angles
 and torsion angles; correlations between esds in cell parameters are only
 used when they are defined by crystal symmetry.  An approximate (isotropic)
 treatment of cell esds is used for estimating esds involving l.s. planes.
;
loop_
  _geom_bond_atom_site_label_1
  _geom_bond_atom_site_label_2
  _geom_bond_distance
  _geom_bond_site_symmetry_2
  _geom_bond_publ_flag
 Cu1 Cu1 2.6379(11) 3_677 ?
 Cu1 O1 1.971(3) . ?
 Cu1 O2 1.990(3) 3_677 ?
 Cu1 O3 1.982(3) 2_656 ?
 Cu1 O4 1.961(3) 4_576 ?
 Cu1 N1 2.168(4) 3_777 ?
 O1 C1 1.263(5) . ?
 O2 Cu1 1.990(3) 3_677 ?
 O2 C1 1.250(5) . ?
 O3 Cu1 1.982(3) 2_646 ?
 O3 C5 1.264(5) . ?
 O4 Cu1 1.961(3) 4_575 ?
 O4 C5 1.251(5) . ?
 O5 C15 1.272(16) . ?
 C1 C2 1.504(6) . ?
 C2 C3 1.378(6) . ?
 C2 C8 1.392(6) . ?
 C3 C4 1.388(6) . ?
 C4 C5 1.498(6) . ?
 C4 C6 1.392(6) . ?
 C6 C7 1.382(6) . ?
 C7 C8 1.399(6) . ?
 C7 C9 1.504(6) . ?
 C9 C10 1.378(7) . ?
 C9 C13 1.386(6) . ?
 C10 C11 1.383(7) . ?
 C11 C12 1.365(7) . ?
 C11 F1 1.348(6) . ?
 C12 N1 1.329(6) . ?
 C13 N1 1.339(5) . ?
 C14 N2 1.480(12) . ?
 C15 N2 1.286(12) . ?
 C16 N2 1.426(9) . ?
 N1 Cu1 2.168(4) 3_777 ?

loop_
  _geom_angle_atom_site_label_1
  _geom_angle_atom_site_label_2
  _geom_angle_atom_site_label_3
  _geom_angle
  _geom_angle_site_symmetry_1
  _geom_angle_site_symmetry_3
  _geom_angle_publ_flag
 O1 Cu1 Cu1 87.22(10) . 3_677 ?
 O1 Cu1 O2 167.54(14) . 3_677 ?
 O1 Cu1 O3 91.38(14) . 2_656 ?
 O1 Cu1 N1 98.82(15) . 3_777 ?
 O2 Cu1 Cu1 81.17(10) 3_677 3_677 ?
 O2 Cu1 N1 93.38(14) 3_677 3_777 ?
 O3 Cu1 Cu1 78.73(10) 2_656 3_677 ?
 O3 Cu1 O2 90.79(14) 2_656 3_677 ?
 O3 Cu1 N1 91.73(14) 2_656 3_777 ?
 O4 Cu1 Cu1 89.42(10) 4_576 3_677 ?
 O4 Cu1 O1 86.85(14) 4_576 . ?
 O4 Cu1 O2 88.50(14) 4_576 3_677 ?
 O4 Cu1 O3 168.10(13) 4_576 2_656 ?
 O4 Cu1 N1 100.17(14) 4_576 3_777 ?
 N1 Cu1 Cu1 168.88(10) 3_777 3_677 ?
 C1 O1 Cu1 119.2(3) . . ?
 C1 O2 Cu1 125.7(3) . 3_677 ?
 C5 O3 Cu1 129.0(3) . 2_646 ?
 C5 O4 Cu1 117.7(3) . 4_575 ?
 O1 C1 C2 116.7(4) . . ?
 O2 C1 O1 126.3(4) . . ?
 O2 C1 C2 117.0(4) . . ?
 C3 C2 C1 120.2(4) . . ?
 C3 C2 C8 119.2(4) . . ?
 C8 C2 C1 120.6(4) . . ?
 C2 C3 C4 121.2(4) . . ?
 C3 C4 C5 120.5(4) . . ?
 C3 C4 C6 119.1(4) . . ?
 C6 C4 C5 120.3(4) . . ?
 O3 C5 C4 116.8(4) . . ?
 O4 C5 O3 125.1(4) . . ?
 O4 C5 C4 118.1(4) . . ?
 C7 C6 C4 120.6(4) . . ?
 C6 C7 C8 119.2(4) . . ?
 C6 C7 C9 120.6(4) . . ?
 C8 C7 C9 120.1(4) . . ?
 C2 C8 C7 120.4(4) . . ?
 C10 C9 C7 122.0(4) . . ?
 C10 C9 C13 118.4(4) . . ?
 C13 C9 C7 119.5(4) . . ?
 C9 C10 C11 116.8(4) . . ?
 C12 C11 C10 121.9(5) . . ?
 F1 C11 C10 119.0(5) . . ?
 F1 C11 C12 119.1(5) . . ?
 N1 C12 C11 121.5(4) . . ?
 N1 C13 C9 123.9(4) . . ?
 O5 C15 N2 122.3(13) . . ?
 C12 N1 Cu1 118.5(3) . 3_777 ?
 C12 N1 C13 117.5(4) . . ?
 C13 N1 Cu1 123.1(3) . 3_777 ?
 C15 N2 C14 118.1(10) . . ?
 C15 N2 C16 127.6(10) . . ?
 C16 N2 C14 114.1(8) . . ?

_shelx_res_file
;
    1.res created by SHELXL-2014/7

TITL 1 in P2(1)/c
CELL 0.71073 10.551 11.0014 14.8305 90 108.788 90
ZERR 4 0.0021 0.0022 0.003 0 0.03 0
LATT 1
SYMM -X,0.5+Y,0.5-Z
SFAC C H Cu F N O
UNIT 64 52 4 4 8 20

L.S. 20
PLAN  20
SIZE 0.15 0.13 0.1
BOND
fmap 2
acta
REM <olex2.extras>
REM <HklSrc "%.\\1.hkl">
REM </olex2.extras>

WGHT    0.046500    2.055700
FVAR       0.41596
CU1   3    0.595564    1.081935    1.013376    11.00000    0.01382    0.01899 =
         0.01617    0.00037    0.00362    0.00034
O1    6    0.691526    0.962734    0.960037    11.00000    0.02001    0.03063 =
         0.03053   -0.01122    0.01081    0.00071
O2    6    0.521920    0.829449    0.927384    11.00000    0.02092    0.02866 =
         0.03443   -0.00652    0.01421    0.00051
O3    6    0.523760    0.625981    0.615583    11.00000    0.02100    0.03622 =
         0.02032   -0.00929    0.00112    0.00522
O4    6    0.688216    0.490214    0.638152    11.00000    0.01783    0.03226 =
         0.01813   -0.00953   -0.00086    0.00357
O5    6    0.007433    0.800595    0.669388    11.00000    0.20850    0.10847 =
         0.11664    0.02846    0.01662    0.03039
C1    1    0.634602    0.863835    0.926883    11.00000    0.01688    0.02260 =
         0.01582   -0.00444    0.00203    0.00080
C2    1    0.708964    0.780365    0.881136    11.00000    0.01905    0.02242 =
         0.01960   -0.00146    0.00693   -0.00253
C3    1    0.641537    0.719899    0.798125    11.00000    0.01046    0.02664 =
         0.02070   -0.00447    0.00055    0.00003
AFIX  43
H3    2    0.550577    0.734143    0.769074    11.00000   -1.20000
AFIX   0
C4    1    0.707000    0.638139    0.757139    11.00000    0.01760    0.02568 =
         0.01793   -0.00471    0.00528   -0.00238
C5    1    0.634350    0.579309    0.663657    11.00000    0.01536    0.02735 =
         0.01971   -0.00290    0.00484   -0.00672
C6    1    0.842623    0.615566    0.801884    11.00000    0.01788    0.02718 =
         0.01958   -0.00912    0.00473   -0.00295
AFIX  43
H6    2    0.885859    0.557004    0.777192    11.00000   -1.20000
AFIX   0
C7    1    0.913655    0.679355    0.882667    11.00000    0.01386    0.02544 =
         0.02378   -0.00321    0.00541   -0.00056
C8    1    0.846051    0.761960    0.922580    11.00000    0.01905    0.02492 =
         0.02157   -0.00661    0.00321   -0.00296
AFIX  43
H8    2    0.892989    0.804860    0.977155    11.00000   -1.20000
AFIX   0
C9    1    1.062740    0.663801    0.925428    11.00000    0.01275    0.02830 =
         0.02171   -0.00383    0.00352   -0.00236
C10   1    1.122348    0.550799    0.939133    11.00000    0.02251    0.02201 =
         0.04435    0.00274    0.00693   -0.00496
AFIX  43
H10   2    1.072105    0.479804    0.923923    11.00000   -1.20000
AFIX   0
C11   1    1.260532    0.548128    0.976611    11.00000    0.02713    0.01969 =
         0.06149    0.01308    0.01127    0.00714
C12   1    1.334918    0.652012    0.997947    11.00000    0.01530    0.03039 =
         0.04638    0.01033    0.00211    0.00132
AFIX  43
H12   2    1.427482    0.646305    1.024413    11.00000   -1.20000
AFIX   0
C13   1    1.144221    0.765640    0.947899    11.00000    0.01912    0.01814 =
         0.02908   -0.00091    0.00393    0.00437
AFIX  43
H13   2    1.103478    0.841650    0.938920    11.00000   -1.20000
AFIX   0

C14   1    0.295636    0.609543    0.750434    11.00000    0.07915    0.28985 =
         0.09760   -0.08722    0.04833   -0.05456
AFIX 137
H14A  2    0.346425    0.677017    0.784757    11.00000   -1.50000
H14B  2    0.332628    0.583514    0.702371    11.00000   -1.50000
H14C  2    0.299256    0.543744    0.793711    11.00000   -1.50000
AFIX   0
C15   1    0.125752    0.760371    0.707059    11.00000    0.26537    0.07205 =
         0.07086   -0.00693    0.06644   -0.04475
AFIX  43
H15   2    0.193659    0.814755    0.737209    11.00000   -1.20000
AFIX   0
C16   1    0.068359    0.551185    0.656777    11.00000    0.08423    0.06124 =
         0.06082   -0.02348    0.03791   -0.01613
AFIX 137
H16A  2   -0.022028    0.580576    0.633140    11.00000   -1.50000
H16B  2    0.073432    0.485348    0.700287    11.00000   -1.50000
H16C  2    0.095516    0.523091    0.604508    11.00000   -1.50000
AFIX   0

F1    4    1.323538    0.439809    0.990295    11.00000    0.03472    0.02621 =
         0.15339    0.02148    0.02009    0.00704
N1    5    1.278087    0.761136    0.981762    11.00000    0.01358    0.02232 =
         0.03022    0.00555    0.00238    0.00140
N2    5    0.154770    0.647074    0.704911    11.00000    0.10918    0.07764 =
         0.06061   -0.02242    0.04900   -0.02703
HKLF 4

REM  1 in P2(1)/c
REM R1 =  0.0741 for    2636 Fo > 4sig(Fo)  and  0.1177 for all    3730 data
REM    228 parameters refined using      0 restraints

END

WGHT      0.0465      2.0558

REM Highest difference peak  0.929,  deepest hole -0.490,  1-sigma level  0.107
Q1    1   0.6601  1.1559  1.0156  11.00000  0.05    0.93
Q2    1   0.6403  0.4614  0.5846  11.00000  0.05    0.59
Q3    1   0.4794  0.5797  0.5737  11.00000  0.05    0.47
Q4    1   0.6763  0.6178  0.7043  11.00000  0.05    0.44
Q5    1   0.6593  1.0148  1.0141  11.00000  0.05    0.43
Q6    1  -0.0039  0.7315  0.6801  11.00000  0.05    0.42
Q7    1   0.0004  0.8592  0.7054  11.00000  0.05    0.41
Q8    1   0.0573  0.8268  0.7405  11.00000  0.05    0.39
Q9    1   0.5230  1.1423  1.0172  11.00000  0.05    0.38
Q10   1   0.5652  0.8300  0.9874  11.00000  0.05    0.37
Q11   1   0.2409  0.7202  0.7108  11.00000  0.05    0.35
Q12   1   0.6747  0.8186  0.9023  11.00000  0.05    0.35
Q13   1   0.6787  0.7615  0.8413  11.00000  0.05    0.35
Q14   1   0.9574  0.6588  0.9068  11.00000  0.05    0.35
Q15   1   0.7716  0.7606  0.9025  11.00000  0.05    0.34
Q16   1   0.7423  0.8841  1.0136  11.00000  0.05    0.34
Q17   1   0.7207  0.4626  0.6762  11.00000  0.05    0.34
Q18   1   0.7049  0.9457  0.9136  11.00000  0.05    0.33
Q19   1   1.0029  0.6769  0.9132  11.00000  0.05    0.33
Q20   1   0.6133  1.0578  0.9576  11.00000  0.05    0.32
;
_shelx_res_checksum                66263
_shelx_hkl_file
;
   0   0   3   -0.26    1.11
   0   0   3    3.12    3.35
   0   0  -3   -0.35    3.31
   0   0  -3   -0.50    1.32
   0   0   4 2448.45   45.58
   0   0  -4 2570.86   28.75
   0   0  -4 2497.00   46.08
   0   0   5   -0.08    5.83
   0   0  -5    7.89    7.39
   0   0  -5   -1.83    2.00
   0   0   6  932.93   32.36
   0   0  -6  884.84   29.95
   0   0  -6  914.83   17.81
   0   0   7    2.70    6.16
   0   0  -7   -0.32    2.30
   0   0   8  470.78   28.34
   0   0  -8  436.95   14.30
   0   0  -8  427.89   25.81
   0   0   9   -5.58    9.54
   0   0  -9   -8.44   12.54
   0   0  -9    3.59    4.10
   0   0  10  309.85   26.17
   0   0 -10  275.95   26.30
   0   0  11    6.37   15.59
   0   0  11    2.22    5.14
   0   0 -11   -2.33   12.69
   0   0  12   81.55   21.08
   0   0 -12  107.53   26.13
   0   0  13   -6.44   17.77
   0   0 -13   14.37   15.90
   0   0  14  124.97   25.73
   0   0 -14  159.81   33.59
   0   0  15  -17.54   17.91
   0   0 -15    9.21   24.69
   0   0  16   91.90   35.49
   0   0 -16   89.47   30.41
   0   0  17   11.95   26.96
   0   0 -17   88.83   35.58
   0   0  18  -17.43   24.61
   0   0 -18    6.23   32.42
   0   1   2 1199.77   18.75
   0  -1   2 1279.84   17.12
   0  -1   2 1293.03   19.73
   0   1   2 1309.30   23.13
   0   1   2 1167.65   18.64
   0   1  -2 1190.16   19.98
   0   1  -2 1266.77   22.44
   0  -1  -2 1279.07   19.00
   0  -1  -2 1269.19   18.79
   0   1  -2 1228.45   16.77
   0  -1   3    6.40    2.60
   0  -1   3    0.95    5.12
   0   1   3    2.41    6.74
   0   1  -3   11.68    2.48
   0   1  -3   16.55    5.34
   0  -1  -3   -0.27    4.75
   0  -1  -3    9.60    3.30
   0  -1   4 3736.69   39.11
   0   1   4 3826.79   62.15
   0  -1   4 3861.49   56.94
   0  -1  -4 3792.18   43.42
   0   1  -4 3769.89   63.18
   0  -1  -4 3777.84   57.75
   0   1   5   55.59    9.91
   0  -1   5   57.10    4.42
   0  -1   5   49.55    8.27
   0   1  -5   63.94   11.60
   0  -1  -5   50.96    4.62
   0  -1  -5   39.43    8.04
   0  -1   6  610.29   24.65
   0  -1   6  673.30   15.61
   0   1   6  634.41   26.28
   0  -1  -6  636.75   25.74
   0  -1  -6  679.79   16.33
   0   1  -6  722.17   28.88
   0  -1   7  914.84   33.53
   0   1   7 1008.62   36.93
   0  -1   7  946.22   20.58
   0  -1  -7 1003.12   35.28
   0  -1  -7  993.83   22.38
   0   1  -7 1010.35   37.11
   0  -1   8   16.26    8.52
   0  -1   8    3.75    4.08
   0   1   8   -9.31   11.73
   0  -1  -8    5.34    4.05
   0  -1  -8    9.32    9.34
   0   1  -8   -1.30    9.92
   0  -1   9   68.81   18.41
   0   1   9   67.07   20.73
   0  -1   9   90.92    6.95
   0  -1  -9   99.88   19.37
   0  -1  -9   85.05    7.58
   0   1  -9   98.91   17.16
   0   1  10   48.74   16.67
   0  -1  10   49.28   18.63
   0  -1  10   44.78    6.91
   0  -1 -10   35.97    6.22
   0  -1 -10   71.12   19.27
   0   1 -10   76.36   17.12
   0   1  11   48.87   15.48
   0  -1  11   25.56    6.68
   0  -1  11    8.32   17.68
   0   1 -11   75.67   17.18
   0  -1 -11   42.36   18.75
   0  -1 -11    0.68    7.01
   0   1  12   40.68   18.44
   0  -1  12   42.30   21.45
   0  -1 -12   56.60   23.11
   0   1 -12   22.24   23.36
   0   1  13   63.99   21.19
   0  -1  13   65.43   26.10
   0  -1 -13   72.33   26.35
   0   1 -13   89.82   23.51
   0  -1  14   42.06   23.73
   0   1  14   99.07   24.55
   0   1 -14  106.64   30.58
   0  -1 -14   81.66   28.37
   0  -1  15   -2.06   25.50
   0   1  15   18.68   25.00
   0  -1 -15   28.04   20.78
   0   1 -15   23.77   26.45
   0   1  16  118.46   37.70
   0  -1  16  132.83   37.01
   0   1 -16  102.51   39.94
   0  -1 -16  199.06   34.24
   0   1  17   11.85   24.12
   0  -1  17  -10.89   19.95
   0  -1 -17  -12.42   20.75
   0   1 -17    6.41   26.30
   0   1  18  103.73   45.45
   0  -1  18  147.79   42.82
   0  -1 -18   92.07   44.67
   0   1 -18  173.29   47.44
   0  -2   0   10.79    2.94
   0  -2   0    2.90    4.27
   0  -2   0    1.62    2.01
   0   2   0    1.99    3.21
   0  -2   1 1767.68   24.58
   0  -2   1 1832.36   31.74
   0   2   1 1802.27   28.90
   0   2   1 1806.64   21.04
   0  -2  -1 1767.98   33.09
   0   2  -1 1711.70   26.15
   0  -2  -1 1715.36   21.19
   0  -2   2  992.88   18.88
   0   2   2  975.56   16.93
   0   2   2  968.44   24.17
   0  -2   2  988.10   22.25
   0  -2  -2  901.36   16.52
   0  -2  -2  966.90   22.24
   0   2  -2  953.48   21.76
   0  -2   3 1237.80   25.77
   0   2   3 1155.94   30.63
   0  -2   3 1182.29   24.86
   0   2  -3 1189.58   28.92
   0  -2  -3 1192.37   23.40
   0  -2  -3 1202.16   26.22
   0  -2   4  396.10   13.80
   0   2   4  394.19   20.40
   0  -2   4  375.18   15.69
   0   2  -4  390.06   19.33
   0  -2  -4  378.06   15.01
   0  -2  -4  402.71   14.24
   0   2   5  464.29   22.22
   0  -2   5  487.46   15.11
   0  -2   5  487.96   19.68
   0  -2  -5  483.16   17.81
   0   2  -5  497.87   21.79
   0  -2  -5  518.64   16.57
   0  -2   6 1099.22   24.14
   0   2   6 1074.97   36.74
   0  -2   6 1065.45   31.83
   0   2  -6 1039.85   35.84
   0  -2  -6 1075.81   32.99
   0  -2  -6 1081.42   25.97
   0  -2   7  767.74   30.23
   0  -2   7  716.88   19.58
   0   2   7  730.77   32.89
   0  -2  -7  742.67   30.19
   0  -2  -7  748.19   21.92
   0   2  -7  685.36   34.05
   0   2   8  443.05   27.97
   0  -2   8  352.94   13.89
   0  -2   8  350.66   25.16
   0  -2  -8  379.58   15.09
   0   2  -8  408.47   26.81
   0  -2  -8  392.95   25.06
   0  -2   9  222.11   23.22
   0  -2   9  187.69   10.64
   0   2   9  192.35   22.69
   0   2  -9  239.18   26.47
   0  -2  -9  198.02   23.23
   0  -2  -9  186.43   11.69
   0  -2  10   25.06   17.07
   0  -2  10   17.70    6.01
   0   2  10   13.56   19.54
   0  -2 -10   37.12   13.80
   0   2 -10   17.25   15.91
   0  -2 -10   23.11    6.71
   0  -2  11   97.82   19.88
   0   2  11  108.01   22.00
   0  -2  11  102.95    8.88
   0  -2 -11   94.57   24.56
   0   2 -11   73.18   22.51
   0  -2 -11   92.15    9.89
   0   2  12   28.08   22.45
   0  -2  12   53.42   19.54
   0  -2 -12   23.36    7.36
   0   2 -12   15.32   18.28
   0  -2 -12   18.33   19.72
   0   2  13  128.07   31.28
   0  -2  13  127.39   27.81
   0  -2 -13  187.90   26.19
   0   2 -13  115.70   27.43
   0   2  14    6.84   19.93
   0  -2  14   20.96   19.06
   0   2 -14   15.59   21.67
   0  -2 -14   45.80   19.94
   0  -2  15  272.17   34.17
   0   2  15  278.01   38.13
   0   2 -15  362.10   45.92
   0  -2 -15  278.76   36.01
   0   2  16   14.33   22.53
   0  -2  16   21.68   26.97
   0  -2 -16   48.32   22.71
   0   2 -16  -26.73   29.90
   0   2  17   91.91   33.73
   0  -2  17  128.54   38.37
   0   2 -17  109.92   36.41
   0  -2 -17  119.85   40.22
   0  -2  18   -9.98   24.65
   0   2  18    5.86   21.53
   0  -2 -18    5.31   27.23
   0   2 -18  -14.09   29.45
   0   3   0    6.08    4.86
   0  -3   0   -4.21    6.84
   0   3   1   15.07    3.11
   0  -3   1   12.65    7.91
   0  -3   1   11.28    4.96
   0   3   1    8.34    6.87
   0   3  -1    5.34    5.39
   0  -3  -1    0.86    9.58
   0  -3   2  165.39   14.92
   0   3   2  174.91   11.96
   0   3   2  180.46    7.48
   0  -3   2  169.64    9.42
   0   3  -2  165.29   10.31
   0  -3  -2  191.92   12.80
   0  -3   3  418.22   15.25
   0  -3   3  419.51   19.04
   0   3   3  411.02   13.16
   0   3   3  409.30   18.42
   0   3  -3  427.23   17.70
   0  -3  -3  435.27   18.22
   0  -3   4   50.99    9.54
   0  -3   4   74.80    7.07
   0   3   4   55.34   10.51
   0  -3  -4   83.01   10.05
   0   3  -4   57.88   12.04
   0  -3  -4   58.64    7.30
   0  -3   5  205.87   13.40
   0  -3   5  176.25   12.91
   0   3   5  190.15   16.11
   0  -3  -5  189.67   12.96
   0   3  -5  222.61   18.38
   0  -3  -5  189.81   12.61
   0  -3   6  841.33   26.33
   0   3   6  807.45   34.48
   0  -3   6  886.52   30.10
   0   3  -6  909.53   35.13
   0  -3  -6  881.26   27.81
   0  -3  -6  835.26   28.82
   0  -3   7  243.60   18.30
   0  -3   7  212.88   13.48
   0   3   7  223.07   21.39
   0   3  -7  212.52   19.82
   0  -3  -7  221.54   14.52
   0  -3  -7  216.60   17.09
   0  -3   8  304.15   15.64
   0   3   8  299.71   25.23
   0  -3   8  251.39   21.32
   0   3  -8  280.65   24.89
   0  -3  -8  265.18   15.26
   0  -3  -8  253.95   21.80
   0  -3   9    4.25    6.16
   0   3   9  -13.94   13.63
   0  -3   9   23.92   11.46
   0   3  -9    3.13   12.38
   0  -3  -9   -2.13    6.06
   0  -3  -9    4.14   11.92
   0   3  10  233.44   25.54
   0  -3  10  209.14   14.36
   0  -3  10  251.69   22.22
   0  -3 -10  208.29   14.31
   0  -3 -10  223.82   26.37
   0   3 -10  216.19   26.53
   0  -3  11   26.36   16.44
   0  -3  11   -2.78    8.55
   0   3  11   38.29   17.49
   0  -3 -11   37.89   17.45
   0  -3 -11   20.55    8.75
   0   3 -11   17.98   20.13
   0   3  12  214.33   34.34
   0  -3  12  229.91   30.12
   0   3 -12  163.07   29.71
   0  -3 -12  197.75   16.79
   0  -3 -12  246.92   29.54
   0  -3  13   12.97   14.90
   0   3  13   24.10   18.22
   0   3 -13   -0.15   17.90
   0  -3 -13   -6.07   18.33
   0   3  14  221.10   33.27
   0  -3  14  185.22   33.18
   0  -3 -14  199.24   30.28
   0   3 -14  201.22   34.27
   0   3  15  -14.21   24.27
   0  -3  15   -1.04   20.93
   0   3 -15   -0.69   21.34
   0  -3 -15   28.74   20.90
   0  -3  16  157.84   32.21
   0   3  16  209.58   36.25
   0   3 -16  152.51   37.37
   0  -3 -16  170.67   39.69
   0  -3  17   -9.32   20.26
   0   3  17   10.31   22.87
   0   3 -17   -7.27   27.49
   0  -3 -17  -11.67   26.03
   0  -4   0  144.47   15.13
   0   4   0  148.51   10.29
   0   4   1   92.27   10.96
   0   4   1  112.47    6.76
   0  -4   1   86.01   15.42
   0   4  -1   92.35    8.28
   0  -4  -1  112.61   16.56
   0   4  -1  113.63    9.29
   0  -4   2   13.61   10.89
   0  -4   2    4.88    5.70
   0   4   2   -2.42    7.99
   0   4   2   11.84    3.48
   0  -4  -2   20.06    8.44
   0   4  -2   19.88    6.99
   0   4   3   10.59    4.44
   0   4   3    1.34    7.59
   0  -4   3    0.41   10.07
   0  -4   3    7.73    6.01
   0   4  -3   20.45    7.92
   0  -4  -3    9.42    7.69
   0   4   4  282.75   12.94
   0  -4   4  322.68   16.06
   0  -4   4  285.82   19.28
   0   4   4  287.51   19.64
   0  -4  -4  292.11   19.14
   0   4  -4  310.01   19.83
   0  -4   5  196.86   14.12
   0  -4   5  193.07   17.25
   0   4   5  186.97   18.08
   0   4  -5  216.24   17.10
   0  -4  -5  211.25   15.36
   0  -4  -5  170.46   12.53
   0  -4   6    2.59    6.81
   0   4   6   16.94    9.37
   0  -4   6   -5.26    8.08
   0  -4  -6   -5.73    7.38
   0   4  -6   -5.48    7.88
   0  -4  -6    4.26    5.68
   0   4   7   42.96   19.41
   0  -4   7   46.35   12.83
   0  -4   7   54.11   12.45
   0  -4  -7   51.15   12.16
   0   4  -7   57.78   18.62
   0  -4  -7   62.03   12.23
   0  -4   8  178.37   18.44
   0  -4   8  144.63   14.53
   0   4   8  133.63   26.73
   0   4  -8  129.71   25.35
   0  -4  -8  143.14   17.81
   0  -4  -8  158.41   16.16
   0  -4   9  267.07   23.61
   0  -4   9  220.66   17.02
   0   4   9  208.25   27.91
   0  -4  -9  240.81   18.51
   0   4  -9  270.10   28.30
   0  -4  -9  207.63   23.17
   0   4  10  236.83   29.30
   0  -4  10  179.31   15.91
   0  -4  10  207.29   23.44
   0  -4 -10  159.39   16.92
   0   4 -10  186.73   26.78
   0  -4 -10  161.20   20.27
   0  -4  11  453.17   23.58
   0   4  11  476.51   40.61
   0  -4  11  529.09   35.74
   0  -4 -11  586.46   38.64
   0   4 -11  514.72   45.83
   0  -4 -11  470.00   25.75
   0  -4  12  133.70   24.80
   0   4  12   83.93   28.14
   0  -4 -12  124.61   25.94
   0  -4 -12  142.29   16.63
   0   4 -12  153.60   32.67
   0  -4  13  183.06   28.63
   0   4  13  216.76   36.10
   0  -4 -13  107.89   17.42
   0  -4 -13  137.51   27.88
   0   4 -13  142.54   35.64
   0   4  14    2.07   19.61
   0  -4 -14   15.02   20.81
   0  -4  15   80.08   30.21
   0   4  15  123.26   36.25
   0  -4 -15   85.62   26.06
   0   4 -15   77.76   29.53
   0   4  16   54.65   27.32
   0  -4  16   31.61   28.32
   0   4 -16   29.49   27.58
   0  -4 -16   11.74   27.87
   0   4  17   83.39   41.66
   0  -4  17   19.09   27.67
   0  -4 -17   84.45   35.30
   0   4 -17   71.27   33.48
   0   5   0    7.14    4.91
   0   5   0   -0.28    7.01
   0  -5   0   -3.66    9.38
   0   5   1  432.27   14.64
   0  -5   1  416.09   25.14
   0   5   1  444.00   21.58
   0   5  -1  408.61   19.12
   0  -5  -1  367.06   27.08
   0   5  -1  403.47   17.46
   0   5   2   66.47   10.06
   0  -5   2   50.42    9.56
   0  -5   2   70.36   13.77
   0   5   2   53.95    5.81
   0  -5  -2   70.64   13.65
   0   5  -2   55.33   10.15
   0   5   3  216.22   18.66
   0   5   3  208.67   10.80
   0  -5   3  230.94   14.40
   0  -5   3  215.87   22.42
   0  -5  -3  195.76   17.88
   0   5  -3  183.06   17.10
   0  -5   4  176.59   18.38
   0  -5   4  166.58   14.25
   0   5   4  184.33   18.30
   0   5   4  178.93   11.60
   0  -5  -4  228.96   21.33
   0   5  -4  187.06   17.69
   0  -5   5  495.12   22.48
   0  -5   5  458.51   27.17
   0   5   5  471.93   31.38
   0  -5  -5  521.85   29.06
   0  -5  -5  481.81   19.20
   0   5  -5  475.12   26.31
   0   5   6  251.51   28.20
   0  -5   6  243.91   18.63
   0  -5   6  279.80   24.56
   0  -5  -6  276.40   16.57
   0  -5  -6  232.78   19.45
   0   5  -6  290.16   25.69
   0  -5   7  336.85   22.81
   0  -5   7  392.37   28.06
   0   5   7  348.83   29.70
   0  -5  -7  373.44   21.64
   0  -5  -7  326.03   22.30
   0   5  -7  350.07   30.71
   0   5   8  167.81   26.97
   0  -5   8  237.04   21.45
   0  -5   8  241.29   21.67
   0  -5  -8  222.57   19.54
   0  -5  -8  187.48   20.64
   0   5  -8  199.15   28.06
   0  -5   9  226.69   21.10
   0  -5   9  264.78   23.99
   0   5   9  220.57   29.60
   0  -5  -9  268.65   24.83
   0  -5  -9  267.87   22.50
   0   5  -9  267.76   33.32
   0   5  10  421.18   37.89
   0  -5  10  434.88   28.32
   0  -5  10  370.78   28.71
   0  -5 -10  423.18   30.55
   0   5 -10  416.09   40.45
   0  -5 -10  393.06   24.50
   0   5  11  181.14   30.73
   0  -5  11  187.81   24.83
   0  -5  11  185.16   20.49
   0  -5 -11  192.61   25.99
   0  -5 -11  176.49   18.42
   0   5 -11  194.88   28.82
   0  -5  12  185.61   27.90
   0   5  12  204.69   31.80
   0  -5 -12  178.16   20.56
   0  -5 -12  203.00   28.59
   0   5 -12  188.64   36.47
   0   5  13   30.62   25.13
   0  -5  13   43.21   21.43
   0  -5 -13   25.24   14.56
   0   5 -13   61.69   29.57
   0  -5 -13   53.11   21.86
   0  -5  14    7.94   20.10
   0  -5 -14  -20.85   20.73
   0   5 -14   50.29   21.52
   0  -5  15   -5.89   21.21
   0   5  15    5.80   22.51
   0   5 -15  -18.27   21.80
   0  -5 -15   -6.86   21.46
   0   5  16  -12.31   34.38
   0  -5  16   89.06   28.34
   0  -5 -16   -0.46   27.52
   0   5 -16   14.39   34.97
   0  -5  17   -1.07   20.68
   0   5 -17   -5.97   29.20
   0  -6   0  958.80   45.08
   0   6   0  901.80   34.71
   0   6   0  918.05   26.69
   0   6   1  240.56   16.89
   0   6   1  241.14   12.31
   0  -6   1  217.96   27.90
   0   6  -1  227.77   17.72
   0  -6  -1  250.71   23.02
   0   6  -1  244.08   15.41
   0   6   2  967.98   37.83
   0  -6   2  890.67   41.89
   0   6   2  958.62   24.91
   0  -6  -2  929.24   44.17
   0   6  -2  943.26   31.78
   0   6  -2  992.04   33.65
   0  -6   3   31.82   13.11
   0   6   3   13.16    5.62
   0   6   3   15.23   10.55
   0  -6   3   10.67    9.79
   0  -6  -3    5.45   13.11
   0   6  -3   11.90   10.48
   0  -6   4 1454.88   55.54
   0   6   4 1420.82   35.56
   0  -6   4 1478.38   43.28
   0   6   4 1544.24   53.22
   0   6  -4 1441.42   49.05
   0  -6  -4 1494.88   53.49
   0  -6   5   -8.59   13.41
   0   6   5   -1.71   12.51
   0   6   5   -6.14    5.79
   0  -6  -5    7.86   10.06
   0   6  -5   12.74   10.84
   0   6   6 1085.70   52.62
   0  -6   6 1041.18   39.03
   0  -6   6 1138.67   51.08
   0   6  -6  996.89   47.12
   0  -6  -6 1032.71   34.37
   0  -6  -6 1025.00   42.83
   0  -6   7   10.70    9.01
   0  -6   7   34.18   16.29
   0  -6  -7    8.05   14.32
   0  -6  -7   -0.63    9.15
   0  -6   8  214.79   22.90
   0   6   8  258.34   36.23
   0  -6   8  236.07   26.58
   0   6  -8  275.36   28.08
   0  -6  -8  251.42   20.89
   0  -6  -8  258.96   26.26
   0  -6   9   69.14   18.11
   0  -6   9   69.61   17.15
   0   6   9   54.42   22.82
   0  -6  -9   55.11   18.71
   0   6  -9   39.63   21.37
   0  -6  -9   77.27   16.08
   0   6  10  211.94   35.57
   0  -6  10  174.81   23.75
   0  -6  10  203.68   23.56
   0   6 -10  168.85   33.19
   0  -6 -10  195.21   23.41
   0  -6 -10  163.11   22.97
   0   6  11   34.86   22.08
   0  -6  11   40.78   17.06
   0  -6  11   22.74   17.19
   0  -6 -11   15.65   16.39
   0  -6 -11   31.31   14.73
   0   6 -11    0.16   19.47
   0  -6  12   94.72   23.77
   0   6  12   44.58   28.41
   0  -6 -12   82.46   18.82
   0   6 -12   95.65   26.32
   0  -6 -12   53.99   22.06
   0  -6  13   59.82   21.15
   0   6  13  -10.92   30.15
   0  -6 -13   50.84   20.15
   0  -6 -13   -2.65   15.37
   0   6 -13    6.77   23.90
   0  -6  14  -10.80   14.34
   0   6  14    0.71   24.61
   0  -6 -14   20.22   17.37
   0   6  15   -7.21   27.37
   0  -6  15   27.22   24.48
   0   6 -15   58.18   26.07
   0  -6 -15   -7.03   23.54
   0  -6  16   21.44   22.37
   0   6  16  -10.46   32.68
   0   6 -16  -11.44   29.98
   0   7   0   28.40   12.45
   0   7   0    2.66    7.80
   0  -7   0   42.90   19.33
   0  -7   1  313.71   30.76
   0   7   1  319.40   22.51
   0   7   1  321.50   17.16
   0   7  -1  298.55   19.00
   0   7  -1  298.95   21.09
   0  -7  -1  345.05   33.42
   0  -7   2   50.91   19.81
   0   7   2   41.54    8.29
   0   7   2   62.75   16.51
   0  -7  -2   42.36   18.16
   0   7  -2   55.99   12.82
   0   7  -2   33.24   14.33
   0   7   3  697.63   23.64
   0  -7   3  679.06   42.50
   0   7   3  713.00   39.51
   0  -7  -3  675.91   44.01
   0   7  -3  745.83   31.55
   0   7  -3  761.18   33.20
   0  -7   4   76.87   14.52
   0  -7   4   30.62   24.80
   0   7   4   54.13   15.75
   0   7   4   45.58    9.58
   0  -7  -4   96.99   22.09
   0   7  -4   56.05   16.70
   0  -7   5  356.60   25.14
   0  -7   5  363.61   32.75
   0   7   5  368.16   18.12
   0   7   5  347.92   30.52
   0   7  -5  441.15   31.41
   0  -7  -5  364.02   34.13
   0  -7   6   51.23   15.38
   0   7   6  106.63   25.08
   0  -7   6   62.96   20.86
   0  -7  -6   85.82   13.00
   0  -7  -6   63.22   18.25
   0   7  -6   74.00   21.45
   0   7   7  372.30   35.65
   0  -7   7  385.77   27.33
   0  -7   7  395.53   37.98
   0   7  -7  396.00   35.09
   0  -7  -7  359.48   20.99
   0  -7  -7  399.17   30.57
   0  -7   8   64.44   20.45
   0  -7   8    6.56   13.96
   0   7   8   -2.70   23.19
   0  -7  -8   29.77   17.24
   0  -7  -8   20.44   10.94
   0   7  -8   21.17   19.83
   0   7   9   86.28   32.16
   0  -7   9   93.10   24.92
   0  -7   9  102.99   17.10
   0   7  -9  191.40   29.37
   0  -7  -9   86.12   19.76
   0  -7  -9  109.14   17.26
   0  -7  10   -6.73   17.26
   0  -7  10   36.74   19.88
   0   7  10    9.40   27.35
   0   7 -10   16.95   23.43
   0  -7 -10   36.26   15.70
   0  -7 -10   59.74   18.32
   0  -7  11   81.59   23.21
   0  -7  11  144.90   25.13
   0   7  11   84.02   29.62
   0  -7 -11   99.13   22.42
   0  -7 -11  106.21   22.39
   0   7 -11   60.89   27.09
   0   7  12   96.88   28.86
   0  -7  12   24.87   17.74
   0   7 -12   39.03   31.49
   0  -7 -12   58.13   20.18
   0  -7 -12   76.03   19.24
   0  -7  13   35.92   25.40
   0   7  13   46.25   30.07
   0   7 -13   60.64   33.47
   0  -7 -13   81.71   24.59
   0  -7 -13   90.75   22.69
   0  -7  14   73.50   28.56
   0   7  14   64.82   40.24
   0   7 -14   89.64   37.68
   0   7  15   61.43   28.69
   0  -7  15   10.36   24.49
   0   7 -15  -14.72   26.74
   0  -8   0  132.27   31.37
   0   8   0  148.69   14.88
   0   8   0  144.30   21.06
   0  -8   1   21.97   22.93
   0   8   1    1.47   15.94
   0   8   1   30.66    9.23
   0   8  -1   22.36   15.63
   0   8  -1   10.42   10.67
   0  -8  -1   35.00   19.65
   0   8   2  453.25   20.47
   0  -8   2  475.09   45.49
   0   8   2  440.51   33.03
   0  -8  -2  468.70   43.45
   0   8  -2  517.41   28.24
   0   8  -2  431.26   30.44
   0  -8   3  112.59   27.31
   0   8   3   52.62   21.59
   0   8   3   62.19   10.44
   0   8  -3   73.21   13.25
   0   8  -3   54.37   17.77
   0  -8  -3   58.35   21.48
   0   8   4  165.74   12.75
   0   8   4  172.37   26.69
   0  -8   4  134.78   34.58
   0  -8  -4  159.27   27.25
   0   8  -4  199.99   20.04
   0   8  -4  149.22   21.95
   0   8   5  155.45   27.40
   0   8   5   74.10   10.87
   0  -8   5  112.08   30.06
   0  -8   5   94.61   18.56
   0  -8  -5   91.06   26.98
   0   8  -5  126.06   22.43
   0  -8   6  261.39   25.09
   0  -8   6  267.03   38.04
   0   8   6  289.12   37.76
   0   8  -6  258.17   31.14
   0  -8  -6  340.81   35.21
   0  -8  -6  266.10   18.18
   0  -8   7    6.87   14.73
   0   8   7  -12.50   23.46
   0  -8   7   71.70   20.22
   0  -8  -7   15.00   17.51
   0  -8  -7   35.61    9.88
   0   8  -7   12.34   16.58
   0  -8   8   27.85   24.08
   0   8   8   15.96   26.80
   0  -8   8   17.91   15.56
   0   8  -8   52.88   19.02
   0  -8  -8   24.10   11.40
   0  -8  -8   46.47   21.42
   0   8   9  117.63   30.15
   0  -8   9  131.96   31.13
   0  -8   9  184.94   21.36
   0  -8  -9  145.59   28.64
   0   8  -9  152.56   32.36
   0  -8  -9  171.33   20.02
   0  -8  10   18.37   22.21
   0   8  10   21.04   29.15
   0  -8  10    8.24   17.54
   0  -8 -10   20.88   14.78
   0  -8 -10   46.39   20.24
   0   8 -10   20.33   24.70
   0   8  11  105.11   40.35
   0  -8  11  112.84   26.75
   0  -8  11  171.70   27.24
   0  -8 -11  117.45   28.59
   0   8 -11  141.65   30.34
   0  -8  12   25.34   22.24
   0   8  12   68.83   34.52
   0   8 -12   73.42   31.86
   0  -8 -12   52.32   22.74
   0  -8  13  178.06   31.08
   0   8  13  144.83   47.33
   0  -8 -13  105.36   28.14
   0   8 -13  154.20   35.22
   0  -8  14   40.70   24.91
   0   8  14   18.40   30.32
   0   8 -14    4.89   28.39
   0   8  15   59.42   36.27
   0   8 -15   39.10   40.33
   0   9   0    8.16   14.19
   0  -9   0   -9.51   21.21
   0  -9   1  201.66   36.30
   0   9   1  169.34   25.67
   0   9   1  171.34   14.88
   0   9  -1  201.20   25.43
   0  -9  -1  160.37   35.55
   0   9  -1  152.96   18.42
   0   9   2   16.03   17.18
   0  -9   2   25.27   20.12
   0   9   2    8.04    7.71
   0   9  -2   22.60   15.70
   0  -9  -2   28.64   19.22
   0   9  -2    4.82   12.04
   0   9   3   87.88   22.73
   0  -9   3   78.54   31.17
   0   9   3   52.45   10.09
   0  -9  -3   42.87   22.61
   0   9  -3   54.50   18.49
   0   9  -3   51.43   17.46
   0   9   4    0.40    6.80
   0   9   4   15.51   13.57
   0  -9   4   14.45   17.90
   0   9  -4   -7.46   12.82
   0   9  -4    2.60   13.31
   0  -9  -4    5.68   16.48
   0   9   5  131.70   26.88
   0   9   5   42.40   10.90
   0  -9   5   87.66   29.44
   0   9  -5   76.47   19.53
   0   9  -5   68.60   20.99
   0  -9  -5   69.57   23.00
   0  -9   6    7.09   23.57
   0   9   6  -10.68   22.86
   0  -9   6   39.66   15.53
   0  -9  -6   20.26    9.12
   0   9  -6   -1.71   18.30
   0  -9  -6   19.29   22.18
   0  -9   7   44.41   27.19
   0   9   7   46.85   22.70
   0  -9   7   30.42   17.99
   0  -9  -7   29.27   19.52
   0   9  -7   48.06   22.86
   0  -9   8   40.76   17.29
   0  -9   8   -8.94   20.57
   0   9   8    2.86   25.01
   0  -9  -8   20.20   21.90
   0   9  -8   21.78   22.81
   0  -9   9  -16.32   27.39
   0   9   9   81.83   26.10
   0  -9   9   19.31   18.71
   0  -9  -9   63.32   25.67
   0   9  -9   27.84   21.80
   0  -9  10  119.93   27.15
   0   9  10  162.08   43.18
   0  -9  10  171.88   34.46
   0   9 -10  192.13   37.02
   0  -9 -10  146.16   34.40
   0  -9  11    6.08   19.30
   0  -9  11   13.23   22.54
   0   9  11    2.83   28.94
   0   9 -11    3.75   25.82
   0  -9 -11   14.99   17.30
   0  -9  12  263.85   33.19
   0   9  12  192.45   50.59
   0   9 -12  190.14   38.39
   0  -9 -12  154.91   35.04
   0  -9  13   43.42   23.38
   0   9  13  -32.52   34.63
   0   9 -13   24.34   30.62
   0  -9 -13   -8.82   21.97
   0   9  14    3.76   21.36
   0   9 -14   -5.12   25.98
   0  10   0   88.67   15.89
   0  10   0   68.32   23.57
   0 -10   0  122.60   33.52
   0  10   1  -12.35   18.26
   0 -10   1   -7.55   25.86
   0  10   1   26.72   10.16
   0  10  -1   15.55   17.38
   0 -10  -1   -7.68   21.05
   0  10   2   53.46   11.70
   0 -10   2   47.53   25.07
   0  10   2    6.84   22.56
   0  10  -2   49.17   14.62
   0 -10  -2  115.02   30.07
   0  10  -2   48.14   21.76
   0  10   3   34.37    9.77
   0  10   3   48.03   23.13
   0 -10   3   36.22   24.43
   0  10  -3   11.80   16.53
   0  10  -3   26.33   19.48
   0 -10  -3   71.41   27.56
   0 -10   4   72.39   25.58
   0  10   4   51.23   23.29
   0 -10  -4   62.03   23.59
   0  10  -4   14.63   18.58
   0  10  -4    2.08   18.70
   0 -10   5   57.56   28.08
   0  10   5   86.55   28.60
   0  10  -5   80.79   22.66
   0  10  -5   43.65   23.31
   0 -10  -5  102.19   31.04
   0 -10   6   37.51   36.06
   0  10   6   88.86   31.25
   0 -10  -6   82.41   31.56
   0  10  -6   54.25   22.56
   0  10  -6  110.62   24.89
   0 -10   7   27.32   25.77
   0  10   7   35.72   23.80
   0 -10  -7   51.48   23.37
   0  10  -7   12.82   24.17
   0 -10   8   63.21   22.56
   0  10   8   80.61   33.16
   0 -10   8   54.65   27.51
   0 -10  -8   29.27   23.66
   0  10  -8   47.63   22.19
   0  10   9   53.06   36.26
   0 -10   9   52.95   32.80
   0 -10   9   97.64   23.90
   0  10  -9   21.36   31.30
   0 -10  -9   56.87   30.75
   0 -10  10    5.25   21.42
   0 -10  10   59.06   29.09
   0  10  10   23.32   25.94
   0 -10 -10   24.26   26.76
   0  10 -10   -9.99   28.60
   0 -10  11  165.62   31.34
   0  10  11  142.23   41.15
   0 -10 -11  176.62   38.00
   0  10 -11  161.89   44.20
   0  10  12   36.95   35.88
   0 -10 -12   34.82   26.97
   0  10 -12  -10.20   27.67
   0  10 -13  110.49   46.28
   0 -11   0   40.98   29.99
   0  11   0   11.51   21.68
   0  11   0   29.99   11.53
   0 -11   1  133.02   31.72
   0  11   1   95.22   16.59
   0  11   1   80.02   27.31
   0  11  -1   87.17   18.26
   0  11  -1  116.81   26.68
   0 -11  -1   87.75   31.37
   0  11   2   81.58   20.93
   0 -11   2   -1.66   27.97
   0  11  -2  -20.73   18.71
   0 -11  -2    3.04   21.54
   0  11  -2    2.67   13.96
   0 -11   3  156.38   43.39
   0  11   3  110.28   31.86
   0  11  -3  140.19   29.35
   0 -11  -3  176.34   34.67
   0  11  -3  138.03   24.29
   0  11   4  142.15   32.69
   0 -11   4  150.92   41.85
   0 -11  -4  138.28   32.82
   0  11  -4  121.31   27.06
   0  11  -4   98.40   25.18
   0  11   5  318.74   40.44
   0 -11   5  343.88   51.68
   0  11  -5  253.19   36.16
   0 -11  -5  435.23   51.07
   0  11  -5  379.37   37.05
   0 -11   6   97.63   35.19
   0  11   6   61.94   30.74
   0  11  -6   16.63   22.94
   0  11  -6   61.19   24.07
   0 -11  -6   -6.44   24.70
   0  11   7   91.92   30.45
   0 -11   7  121.78   33.43
   0  11  -7   94.03   30.09
   0  11  -7   68.54   26.96
   0 -11  -7   97.29   35.46
   0 -11   8   -4.92   31.19
   0  11   8   26.32   31.21
   0  11  -8    0.91   25.66
   0  11  -8   47.79   22.14
   0 -11  -8    6.50   28.62
   0 -11   9   65.66   22.46
   0 -11   9   60.10   31.13
   0  11   9  113.33   38.78
   0  11  -9   14.69   32.31
   0 -11  -9   81.41   34.95
   0 -11  10   25.11   29.14
   0  11  10  -11.18   32.20
   0  11 -10    4.86   22.88
   0 -11 -10   21.39   28.27
   0  11  11   89.82   40.91
   0  11 -11    2.03   36.24
   0 -11 -11   38.11   33.36
   0  12   0  163.39   32.59
   0 -12   0  166.84   44.62
   0  12   1   -0.54   20.94
   0  12  -1  -10.70   20.17
   0 -12  -1   -3.79   23.23
   0  12   2  166.42   36.52
   0 -12   2  244.14   49.43
   0  12  -2  168.66   26.01
   0  12  -2  201.51   34.76
   0 -12  -2  227.01   45.27
   0  12   3   24.87   23.08
   0 -12   3   91.04   37.94
   0 -12  -3   84.48   35.04
   0  12  -3   46.58   20.11
   0  12  -3   37.72   24.98
   0  12   4  131.22   35.35
   0 -12   4  126.97   36.40
   0  12  -4  116.12   27.11
   0  12  -4   58.00   29.88
   0 -12  -4  158.64   42.72
   0  12   5  -17.68   19.80
   0  12  -5   57.28   18.97
   0  12  -5  -16.34   18.98
   0 -12  -5  -23.99   26.99
   0  12   6  129.63   39.77
   0 -12   6   81.56   38.26
   0  12  -6  140.93   32.43
   0 -12  -6  131.55   34.80
   0  12  -6   88.81   29.23
   0  12   7   88.88   30.51
   0 -12   7   -2.56   32.48
   0 -12  -7  -26.89   30.00
   0  12  -7   -5.39   24.35
   0  12   8  112.47   40.75
   0 -12   8   87.58   43.04
   0 -12  -8   68.48   32.17
   0  12  -8   55.48   33.46
   0 -12   9   -5.82   30.18
   0  12   9   -6.97   29.54
   0 -12  -9  -23.76   27.01
   0  12  -9   26.70   20.80
   0 -13   0  -10.82   33.08
   0 -13   1  131.48   44.00
   0  13   1  178.42   41.29
   0  13  -1  257.92   39.30
   0 -13  -1  273.39   53.81
   0  13   2  100.98   30.84
   0  13  -2   25.34   28.33
   0 -13  -2    4.36   36.44
   0  13   3   41.20   33.86
   0 -13   3   84.20   36.80
   0 -13  -3   86.62   35.31
   0  13  -3   80.11   30.51
   0  13   4   50.10   24.86
   0 -13   4   -1.50   38.17
   0 -13  -4   -4.26   28.97
   0  13   5   43.96   36.90
   0 -13   5   17.64   42.22
   0 -13  -5   68.72   32.16
   0 -13   6    5.88   38.56
   0  13   6  -32.53   34.06
   0 -13  -6   80.76   30.57
   0  13   7    0.61   40.58
   0 -13   7   59.17   42.45
   0 -13  -7   85.68   41.07
   0 -14   0   18.94   38.98
   0 -14   1    8.14   38.00
   0 -14  -1   23.61   38.47
   0 -14   2  -24.41   58.15
   0 -14  -2  582.20   57.67
   0  14   3   13.91   35.86
   0 -14   3  111.44   43.00
   0 -14  -3   21.23   35.08
   1   0 -18  146.70   43.75
  -1   0  18   70.97   40.20
   1   0 -17   -1.10   27.38
  -1   0  17   10.66   22.41
   1   0 -16  133.83   38.83
  -1   0  16  154.69   38.14
   1   0 -15   23.47   24.16
  -1   0  15    4.20   19.46
   1   0 -14  404.87   38.25
  -1   0  14  364.75   39.81
   1   0 -13   -3.15   17.51
  -1   0  13   45.77   20.92
   1   0 -12  316.09   31.16
  -1   0  12  292.83   29.48
   1   0 -11    8.24   16.08
  -1   0  11   -0.70   11.54
   1   0 -10  761.68   44.25
  -1   0  10  716.03   36.42
   1   0  -9   11.99    8.54
  -1   0   9    0.17    1.75
  -1   0   9  -11.10    7.58
   1   0  -8 5565.01  111.59
  -1   0   8 5472.37  106.32
   1   0  -7   -7.62    7.86
   1   0  -7    5.46    1.63
  -1   0   7   17.62    9.66
   1   0  -6  458.50   21.37
   1   0  -6  467.89    7.26
  -1   0   6  441.64   20.33
   1   0  -5    0.78    0.96
   1   0  -5   11.34    6.08
  -1   0   5    4.77    1.46
  -1   0   5    2.07    6.97
   1   0  -4 4740.31   67.59
   1   0  -4 4692.74   17.94
  -1   0   4 4826.60   66.93
  -1   0   4 4725.96   20.94
   1   0  -3    0.27    0.51
   1   0  -3    0.06    3.73
  -1   0   3    3.49    3.73
   1   0   2 4596.77   51.61
  -1   0  -2 4711.51   49.95
  -1   0  -2 4530.45   52.90
   1   0   3   -5.40    5.67
  -1   0  -3    5.86    4.83
  -1   0  -3    2.60    3.67
   1   0   4  173.08   13.67
  -1   0  -4  168.10   11.96
  -1   0  -4  201.11    9.22
   1   0   5    4.38    6.28
  -1   0  -5    2.00    4.24
  -1   0  -5    1.61    7.27
   1   0   6  607.03   25.23
  -1   0  -6  628.18   18.35
  -1   0  -6  599.74   25.29
   1   0   7    4.09    9.27
  -1   0  -7   12.91    7.60
  -1   0  -7   -4.70    4.68
   1   0   8   -9.30   10.29
  -1   0  -8   -6.61    6.33
   1   0   9   -7.85   12.95
  -1   0  -9   -4.15    5.55
  -1   0  -9    2.57   10.92
   1   0  10   -8.35   15.30
  -1   0 -10   21.21   13.33
  -1   0 -10    3.58    6.33
   1   0  11    3.05    6.79
   1   0  11    0.07   16.36
  -1   0 -11   16.97   13.59
   1   0  12   -0.24    6.94
   1   0  12   -6.38   17.32
  -1   0 -12   38.35   14.71
   1   0  13  -12.44   16.91
  -1   0 -13   -8.99   21.35
   1   0  14  101.44   24.64
  -1   0 -14   82.83   31.03
   1   0  15  -20.58   19.30
  -1   0 -15    1.40   21.58
   1   0  16   77.77   26.04
  -1   0 -16   -2.36   34.38
   1   0  17    5.94   29.99
  -1   0 -17   17.98   27.13
   1   1 -18   -7.00   34.49
   1  -1 -18   92.47   32.37
  -1  -1  18  -22.20   31.72
  -1   1  18    6.74   27.43
   1   1 -17  103.72   33.72
   1  -1 -17   94.55   37.13
  -1  -1  17   93.46   29.81
  -1   1  17   68.03   38.47
   1  -1 -16  138.29   36.28
   1   1 -16  105.83   30.69
  -1   1  16   98.57   34.40
  -1  -1  16   85.32   33.53
   1   1 -15  220.71   37.94
   1  -1 -15  152.24   35.28
  -1  -1  15  127.59   34.46
  -1   1  15  158.71   28.94
   1  -1 -14   11.59   19.82
   1   1 -14   24.73   26.79
  -1   1  14   78.63   24.33
  -1  -1  14   55.88   26.15
   1   1 -13  128.53   26.29
   1  -1 -13  108.39   26.19
  -1   1  13  193.66   30.33
  -1  -1  13  234.93   32.02
   1   1 -12   49.08   20.49
   1  -1 -12   14.10   20.53
  -1  -1  12   29.86   19.36
  -1   1  12  -10.16   15.94
   1   1 -11  307.09   32.07
   1  -1 -11  234.44   27.81
  -1  -1  11  290.50   27.30
  -1   1  11  253.26   30.70
   1  -1 -10   12.09   13.68
   1  -1 -10   -3.43    3.06
   1   1 -10    4.55   11.90
  -1  -1  10   17.80   13.01
   1   1  -9  472.53   29.95
   1  -1  -9  481.33   13.05
   1  -1  -9  496.86   31.15
  -1  -1   9  451.08   10.56
  -1   1   9  465.74   28.32
  -1  -1   9  516.48   28.56
   1  -1  -8   10.39   10.53
   1  -1  -8    1.19    2.93
   1   1  -8   25.66   10.12
  -1  -1   8   11.92    8.08
  -1   1   8    4.19   11.56
   1  -1  -7   72.67   14.86
   1  -1  -7   88.24    4.95
   1   1  -7  112.09   16.40
  -1  -1   7   92.14    4.20
  -1   1   7  123.35   13.79
  -1  -1   7   92.92   14.84
   1  -1  -6   -4.32    7.08
   1  -1  -6    0.56    2.19
   1   1  -6   14.92    7.90
  -1  -1   6   -1.70    6.05
  -1   1   6   -6.03    7.72
  -1  -1   6    1.56    1.70
   1  -1  -5  413.12   17.35
   1  -1  -5  436.60   10.18
   1   1  -5  427.96   18.86
  -1  -1   5  398.48   17.35
  -1   1   5  425.59   20.33
  -1  -1   5  385.68    7.22
   1   1  -4 3188.00   24.78
   1   1  -4 3241.63   54.84
   1  -1  -4 3294.74   35.85
   1  -1  -4 3167.45   52.40
  -1  -1   4 3135.61   51.23
  -1   1   4 3296.25   54.48
   1   1  -3   71.07    3.37
   1  -1  -3   79.61    4.98
   1   1  -3   68.68    7.08
  -1   1   3   71.03    4.51
  -1  -1   3   74.58    3.29
  -1   1   3   85.21    7.51
  -1   1   3   78.35    7.34
  -1  -1   3   85.34    6.75
   1   1  -2  346.49    7.39
   1   1  -2  375.87   10.26
   1  -1  -2  369.43    9.61
   1  -1  -2  337.63   10.03
  -1  -1   2  332.66    9.55
  -1   1   2  351.28    8.82
  -1   1   2  370.87   10.66
  -1  -1   2  365.17    7.15
  -1   1   2  387.48   10.76
  -1  -1   2  394.96   10.57
   1  -1   1 2835.41   34.79
   1   1   1 2771.94   36.77
   1  -1   1 2823.96   21.67
   1   1   1 2772.75   22.89
  -1   1  -1 2695.42   35.25
  -1   1  -1 2807.34   37.37
  -1  -1  -1 2813.45   35.20
  -1  -1  -1 2796.40   22.72
  -1   1  -1 2762.02   22.81
   1  -1   2  783.33   16.78
   1   1   2  725.42   19.02
   1  -1   2  735.70   13.76
   1   1   2  692.29   14.27
  -1  -1  -2  729.79   14.48
  -1   1  -2  687.03   14.71
  -1  -1  -2  726.73   16.16
  -1   1  -2  734.88   18.84
   1  -1   3  932.68   20.93
   1  -1   3  905.75   20.51
   1   1   3  831.49   24.06
  -1   1  -3  920.88   25.18
  -1  -1  -3  906.26   20.25
  -1  -1  -3  907.72   21.31
   1  -1   4  385.15   13.54
   1  -1   4  399.15   14.59
   1   1   4  369.94   19.52
  -1  -1  -4  364.09   13.43
  -1  -1  -4  371.05   15.05
  -1   1  -4  374.53   17.63
   1   1   5  759.28   27.03
   1  -1   5  705.82   24.36
   1  -1   5  736.65   20.13
  -1   1  -5  711.98   28.46
  -1  -1  -5  754.90   24.47
  -1  -1  -5  732.82   20.60
   1  -1   6 1610.40   42.66
   1   1   6 1669.86   48.40
   1  -1   6 1587.77   33.93
  -1   1  -6 1487.79   44.81
  -1  -1  -6 1544.98   33.86
  -1  -1  -6 1541.27   42.97
   1  -1   7  161.04   14.86
   1   1   7  142.40   17.71
   1  -1   7  169.34   10.87
  -1  -1  -7  173.44   17.85
  -1   1  -7  190.41   20.59
  -1  -1  -7  164.76   11.71
   1  -1   8  205.75   13.47
   1  -1   8  223.30   21.04
   1   1   8  174.91   20.21
  -1  -1  -8  197.48   21.17
  -1  -1  -8  222.21   13.88
  -1   1  -8  209.96   24.02
   1  -1   9   -1.81    5.16
   1  -1   9  -12.89   10.77
   1   1   9   -1.42   10.31
  -1  -1  -9    5.75    5.17
  -1  -1  -9  -15.07   11.76
  -1   1  -9   -0.62   10.84
   1  -1  10   59.92    9.26
   1   1  10  104.65   22.96
   1  -1  10   68.68   17.50
  -1  -1 -10   53.82    9.74
  -1  -1 -10   74.87   20.61
  -1   1 -10  100.86   23.14
   1   1  11    8.90   15.66
   1  -1  11   -6.65   15.61
  -1   1 -11   -9.05   15.04
  -1  -1 -11   14.00    7.02
  -1  -1 -11   -0.06   13.80
   1   1  12  107.39   26.37
   1  -1  12  110.74   19.69
   1  -1  12   80.50   10.32
  -1   1 -12   90.72   22.02
  -1  -1 -12   47.21   12.09
  -1  -1 -12   69.92   25.09
   1   1  13    1.44   17.95
   1  -1  13  -16.45   16.40
  -1  -1 -13   20.96   14.53
  -1   1 -13   -2.58   15.72
   1  -1  14  149.26   26.29
   1   1  14  109.22   33.70
  -1   1 -14  129.90   29.84
  -1  -1 -14   93.49   32.38
   1   1  15    1.20   21.47
   1  -1  15  -10.93   25.44
  -1   1 -15   78.60   24.13
  -1  -1 -15   17.46   22.48
   1  -1  16   85.88   28.11
   1   1  16   86.03   28.82
  -1   1 -16   82.50   37.92
  -1  -1 -16   23.74   35.43
   1  -1  17   -9.45   35.42
   1   1  17   55.38   27.87
  -1  -1 -17   70.63   37.66
  -1   1 -17  109.54   37.29
   1   2 -18   20.06   28.85
   1  -2 -18   -2.34   27.45
  -1   2  18   27.68   31.93
  -1  -2  18   49.20   31.80
   1   2 -17  236.19   47.08
   1  -2 -17  216.12   44.59
  -1  -2  17  207.58   33.31
  -1   2  17   84.47   34.97
   1  -2 -16  118.59   34.98
   1   2 -16  109.32   30.90
  -1  -2  16   84.52   27.79
  -1   2  16   80.29   28.92
   1  -2 -15  142.10   28.96
   1   2 -15  122.21   37.26
  -1   2  15   93.52   28.84
  -1  -2  15  231.54   34.35
   1  -2 -14   12.06   22.23
   1   2 -14    4.91   23.78
  -1  -2  14   20.84   21.96
  -1   2  14   21.98   22.10
   1  -2 -13   55.99   24.08
   1   2 -13   57.85   26.02
  -1  -2  13   31.93   18.44
  -1   2  13   37.72   24.38
   1  -2 -12   41.66   23.05
   1   2 -12   53.46   19.65
  -1   2  12   24.57   22.59
  -1  -2  12   85.09   21.89
   1  -2 -11   25.64    5.48
   1   2 -11   -3.99   20.92
   1  -2 -11   35.12   18.73
  -1  -2  11    1.51   18.24
  -1   2  11   48.14   19.95
   1  -2 -10  144.56   24.04
   1  -2 -10  130.81    8.72
   1   2 -10  127.74   21.24
  -1  -2  10  140.59   22.92
  -1   2  10  101.10   25.19
   1  -2  -9  144.32    8.90
   1  -2  -9  162.75   22.01
   1   2  -9  196.88   21.51
  -1  -2   9  223.98   22.09
  -1   2   9  201.59   20.55
  -1  -2   9  166.17    8.36
   1  -2  -8   27.49    5.34
   1  -2  -8   28.68   13.93
   1   2  -8   27.04   13.27
  -1   2   8   57.91   13.16
  -1  -2   8   54.78   14.06
  -1  -2   8   44.46    5.45
   1  -2  -7   53.12    5.98
   1  -2  -7   62.77   10.94
   1   2  -7   72.55   12.70
  -1  -2   7   63.83   10.97
  -1  -2   7   73.15    6.08
  -1   2   7   74.55   15.66
   1  -2  -6  172.62   14.66
   1  -2  -6  157.17    9.15
   1   2  -6  184.79   15.63
  -1   2   6  167.07   15.16
  -1  -2   6  170.90   14.80
  -1  -2   6  177.82    8.43
   1   2  -5   39.91   10.08
   1  -2  -5   20.36    8.24
   1  -2  -5   20.32    5.67
  -1   2   5   21.55   10.28
  -1  -2   5   17.30    7.87
  -1  -2   5   19.43    4.96
   1  -2  -4    0.06    5.65
   1   2  -4   -6.13    6.29
  -1   2   4    4.34    6.21
  -1  -2   4    4.63    3.78
  -1  -2   4    6.95    6.11
  -1   2   4   21.38    6.16
   1  -2  -3  696.13   21.01
   1   2  -3  717.82   19.92
  -1   2   3  717.66   21.87
  -1  -2   3  720.20   20.34
  -1  -2   3  704.65   17.18
  -1   2   3  715.64   19.47
   1   2  -2 2819.31   38.53
   1  -2  -2 2747.94   45.66
  -1   2   2 2817.33   40.15
  -1  -2   2 2814.55   40.00
  -1  -2   2 2805.85   41.68
  -1   2   2 2793.43   39.95
   1  -2  -1   16.60    6.12
   1   2  -1    3.93    2.24
   1  -2  -1   12.94    2.49
  -1   2   1   -0.51    3.97
  -1   2   1    8.95    3.17
  -1  -2   1    9.09    4.55
  -1  -2   1   -0.34    2.13
  -1  -2   1   14.34    4.06
   1  -2   0 1354.79   27.05
   1   2   0 1332.04   26.20
   1   2   0 1311.49   10.46
  -1   2   0 1290.58   15.49
  -1   2   0 1323.34   16.16
  -1   2   0 1264.74   24.13
  -1  -2   0 1323.16   25.99
   1  -2   1  168.51    5.02
   1  -2   1  163.74    9.45
   1   2   1  164.78    9.37
  -1   2  -1  168.77    9.33
  -1   2  -1  152.88    4.68
  -1  -2  -1  162.37    2.89
  -1  -2  -1  180.86    9.38
   1   2   2   93.30    9.30
   1   2   2   77.30    4.20
   1  -2   2   91.52    5.37
   1  -2   2   85.40    9.35
  -1  -2  -2   87.80    7.74
  -1  -2  -2   88.49    4.13
  -1   2  -2   84.69    8.83
   1  -2   3  857.25   18.89
   1   2   3  854.02   26.98
   1  -2   3  879.74   22.83
  -1  -2  -3  858.17   23.40
  -1   2  -3  849.23   27.35
  -1  -2  -3  904.68   19.02
   1  -2   4  457.54   16.54
   1   2   4  427.19   20.19
   1  -2   4  460.38   16.99
  -1  -2  -4  416.86   15.73
  -1   2  -4  412.09   19.65
  -1  -2  -4  439.99   16.51
   1  -2   5 3131.52   56.94
   1  -2   5 3122.08   53.52
   1   2   5 3108.57   68.24
  -1  -2  -5 3073.86   54.49
  -1  -2  -5 3095.69   56.54
  -1   2  -5 3070.26   67.47
   1  -2   6  591.85   20.14
   1  -2   6  590.66   24.74
   1   2   6  604.19   29.38
  -1   2  -6  615.26   31.06
  -1  -2  -6  591.97   21.09
  -1  -2  -6  609.73   24.40
   1  -2   7  667.13   22.44
   1   2   7  678.73   35.17
   1  -2   7  656.60   27.41
  -1  -2  -7  663.15   23.81
  -1  -2  -7  650.68   28.83
  -1   2  -7  629.62   32.04
   1  -2   8  161.69   13.60
   1   2   8  213.72   22.01
   1  -2   8  181.16   17.73
  -1  -2  -8  192.32   14.18
  -1  -2  -8  174.91   20.30
  -1   2  -8  203.62   24.29
   1  -2   9  393.49   20.04
   1   2   9  435.63   35.46
   1  -2   9  458.89   30.58
  -1   2  -9  416.35   35.76
  -1  -2  -9  396.43   29.30
  -1  -2  -9  421.78   21.00
   1  -2  10   23.99    7.84
   1  -2  10   17.96   13.83
   1   2  10   32.62   20.51
  -1  -2 -10   13.84    8.07
  -1   2 -10   18.54   16.62
  -1  -2 -10    7.12   13.35
   1  -2  11  122.38   12.80
   1   2  11  140.50   25.35
   1  -2  11  158.72   21.59
  -1   2 -11  143.70   25.49
  -1  -2 -11  159.59   15.40
  -1  -2 -11  147.51   25.75
   1  -2  12   36.27   15.04
   1   2  12   23.03   17.79
   1  -2  12   12.51    7.33
  -1  -2 -12   -2.77    9.40
  -1   2 -12   40.03   18.00
  -1  -2 -12  -11.52   17.54
   1  -2  13   50.83   20.67
   1   2  13  152.65   28.99
  -1  -2 -13   40.33   11.76
  -1  -2 -13   55.85   20.14
  -1   2 -13   80.82   29.01
   1   2  14   10.41   17.54
   1  -2  14  -10.46   15.56
  -1   2 -14   17.97   22.07
  -1  -2 -14    5.30   20.07
   1  -2  15  219.34   37.56
   1   2  15  254.98   36.26
  -1   2 -15  182.09   43.06
  -1  -2 -15  224.43   39.58
   1  -2  16   34.28   28.59
   1   2  16    9.74   31.11
  -1   2 -16   -3.18   33.59
  -1  -2 -16   61.47   29.82
   1  -2  17   89.56   33.27
   1   2  17  190.55   42.89
  -1   2 -17  115.17   45.42
  -1  -2 -17  127.27   34.67
   1  -3 -18   89.98   41.07
   1   3 -18  117.32   43.23
  -1  -3  18   44.51   37.28
  -1   3  18   70.94   34.43
   1  -3 -17   -9.45   19.75
  -1   3  17   -4.80   20.22
  -1  -3  17    7.45   22.33
   1   3 -16  107.46   35.90
   1  -3 -16   75.04   32.36
  -1   3  16   56.49   28.83
  -1  -3  16   48.24   25.78
   1   3 -15   88.71   27.91
   1  -3 -15   -9.18   23.29
  -1   3  15    7.23   20.32
  -1  -3  15   -1.99   22.39
   1  -3 -14   90.68   27.94
   1   3 -14   67.33   24.32
  -1   3  14   66.37   30.88
  -1  -3  14   39.75   21.08
   1  -3 -13   50.19   22.30
   1   3 -13   14.51   19.16
  -1   3  13   52.41   23.81
  -1  -3  13  -12.41   19.93
   1  -3 -12    2.38    6.25
   1  -3 -12   15.76   16.93
   1   3 -12   10.63   19.34
  -1  -3  12   -2.08   16.08
  -1   3  12   30.38   19.69
   1  -3 -11   51.16    8.38
   1   3 -11  101.86   24.50
   1  -3 -11   54.11   20.82
  -1   3  11   59.53   21.35
  -1  -3  11   70.50   16.51
   1  -3 -10    3.12    5.48
   1  -3 -10  -15.09   14.59
   1   3 -10    6.75   13.41
  -1  -3  10    1.26   13.58
  -1   3  10   27.45   17.97
  -1  -3  10    7.28    5.28
   1  -3  -9   26.61    6.89
   1  -3  -9   19.44   14.54
   1   3  -9    8.04   14.23
  -1   3   9   27.82   14.33
  -1  -3   9   10.65   13.59
  -1  -3   9   18.87    7.23
   1  -3  -8    1.10    4.71
   1  -3  -8   13.16    9.11
  -1   3   8    3.46   12.04
  -1  -3   8   -2.27    4.40
  -1  -3   8    1.75    7.57
   1  -3  -7   21.46    7.11
   1   3  -7  -10.48   10.31
   1  -3  -7    9.88   10.49
  -1   3   7   46.44   14.49
  -1  -3   7   23.01    6.27
  -1  -3   7    4.48   10.15
   1  -3  -6   33.66   10.43
   1  -3  -6   56.04    9.22
   1   3  -6   74.41   12.79
  -1  -3   6   36.03    7.07
  -1  -3   6   29.49    8.76
  -1   3   6   44.06   11.07
   1  -3  -5   21.40    8.34
   1   3  -5   15.95    7.74
  -1   3   5   -2.14    8.29
  -1  -3   5   10.46    5.66
  -1  -3   5   19.01    6.21
   1  -3  -4  543.97   22.64
   1   3  -4  562.09   22.25
  -1   3   4  525.85   23.38
  -1  -3   4  541.16   19.78
  -1   3   4  539.86   19.13
  -1  -3   4  570.33   20.69
   1   3  -3  411.34   16.85
   1  -3  -3  374.88   20.26
  -1   3   3  391.34   14.89
  -1   3   3  355.04   17.72
  -1  -3   3  384.29   16.21
  -1  -3   3  381.08   17.68
   1  -3  -2  215.71   17.60
   1   3  -2  232.17   11.28
  -1   3   2  207.32   10.55
  -1  -3   2  234.00   11.31
  -1   3   2  243.70   12.85
  -1  -3   2  222.34   14.75
   1  -3  -1  453.85   21.87
   1   3  -1  454.68   11.79
  -1   3   1  468.94   14.35
  -1  -3   1  481.29   20.37
  -1  -3   1  470.22   16.46
  -1   3   1  467.02   14.45
   1  -3   0  107.95   11.89
   1   3   0   96.89   10.58
   1   3   0  109.11    4.26
  -1   3   0  122.83    9.24
  -1  -3   0  103.26    4.31
  -1   3   0  113.27    6.74
  -1  -3   0  102.07   12.22
   1  -3   1  362.76    9.97
   1   3   1  347.74   15.88
   1  -3   1  333.26   17.23
   1   3   1  363.76    6.38
  -1  -3  -1  321.29    6.14
  -1   3  -1  379.41   15.73
  -1  -3  -1  323.81   15.86
   1  -3   2   28.68    4.17
   1   3   2   35.43    8.83
   1  -3   2   32.83   10.16
  -1   3  -2   28.99    9.34
  -1  -3  -2   43.51    3.08
  -1  -3  -2   35.37    7.66
   1  -3   3   76.93    6.48
   1   3   3   88.30   12.96
   1  -3   3   70.78   10.81
  -1  -3  -3   91.40    9.30
  -1  -3  -3   73.34    4.88
  -1   3  -3   96.80   11.93
   1  -3   4  680.14   22.67
   1  -3   4  686.77   20.28
   1   3   4  681.74   28.55
  -1   3  -4  662.53   26.58
  -1  -3  -4  682.64   24.84
  -1  -3  -4  670.16   18.41
   1   3   5 1064.82   38.33
   1  -3   5 1059.18   29.02
   1  -3   5 1082.16   31.69
  -1   3  -5 1054.13   39.09
  -1  -3  -5 1091.28   32.75
  -1  -3  -5 1075.83   28.27
   1  -3   6  338.06   17.88
   1  -3   6  328.96   17.84
   1   3   6  329.26   26.11
  -1   3  -6  305.49   22.34
  -1  -3  -6  306.55   17.20
  -1  -3  -6  290.63   17.32
   1  -3   7  167.87   14.06
   1  -3   7  181.39   16.41
   1   3   7  135.32   19.86
  -1   3  -7  145.07   22.42
  -1  -3  -7  156.68   14.35
  -1  -3  -7  139.65   15.45
   1  -3   8  868.99   30.70
   1   3   8  871.28   43.85
   1  -3   8  844.04   35.79
  -1  -3  -8  896.60   36.69
  -1   3  -8  834.24   41.70
  -1  -3  -8  920.80   31.47
   1  -3   9   13.08    8.41
   1  -3   9   25.01   10.43
   1   3   9   19.38   15.36
  -1   3  -9   13.98   17.67
  -1  -3  -9   -3.75    8.79
  -1  -3  -9   -8.97   12.67
   1  -3  10  494.57   33.64
   1  -3  10  508.09   24.05
   1   3  10  551.89   40.40
  -1   3 -10  489.73   37.60
  -1  -3 -10  564.99   27.01
  -1  -3 -10  544.04   34.46
   1  -3  11   35.13   13.07
   1   3  11  -14.86   16.01
   1  -3  11   -0.35    9.64
  -1  -3 -11   23.68   16.45
  -1  -3 -11    2.09   10.11
  -1   3 -11   38.63   20.31
   1  -3  12  173.33   15.73
   1   3  12  205.06   30.33
   1  -3  12  244.18   29.21
  -1  -3 -12  188.81   17.70
  -1  -3 -12  187.87   28.89
  -1   3 -12  244.81   31.61
   1   3  13    5.80   20.97
   1  -3  13   13.47   13.97
  -1   3 -13   22.88   21.05
  -1  -3 -13   -8.81   15.01
  -1  -3 -13   -0.53    8.95
   1  -3  14  374.82   41.31
   1   3  14  424.29   49.01
  -1  -3 -14  402.03   37.82
  -1   3 -14  405.74   44.20
   1  -3  15   -8.83   25.66
   1   3  15    1.15   29.56
  -1   3 -15   67.60   26.46
  -1  -3 -15   59.17   22.51
   1   3  16  159.46   38.10
   1  -3  16  227.54   41.22
  -1  -3 -16  180.70   41.35
  -1   3 -16  274.42   41.50
   1  -3  17   65.28   31.94
   1   3  17   14.57   35.59
  -1   3 -17   29.34   29.18
  -1  -3 -17    7.12   33.62
   1  -4 -17   82.40   35.58
   1   4 -17    5.70   38.14
  -1  -4  17   73.57   31.36
  -1   4  17    8.03   28.67
   1  -4 -16    7.10   26.06
   1   4 -16   40.22   28.97
  -1   4  16   -0.75   22.22
  -1  -4  16    6.73   20.74
   1  -4 -15    2.01   21.85
   1   4 -15    8.23   26.05
  -1   4  15    3.47   19.35
  -1  -4  15   11.29   21.29
   1   4 -14   67.75   31.07
   1  -4 -14   15.76   26.46
  -1  -4  14   65.06   24.76
  -1   4  14   76.81   30.66
   1  -4 -13    5.70   20.47
   1   4 -13   53.88   23.95
  -1   4  13   -3.35   19.80
  -1  -4  13   18.30   19.83
   1  -4 -12  224.24   16.17
   1   4 -12  250.14   36.34
   1  -4 -12  299.91   31.81
  -1   4  12  215.55   30.87
  -1  -4  12  285.24   30.47
   1   4 -11   32.48   18.99
   1  -4 -11   45.76   10.36
   1  -4 -11    7.78   15.24
  -1  -4  11   41.76   18.67
  -1   4  11   21.31   22.74
   1  -4 -10   26.51    9.23
   1  -4 -10   17.62   13.75
   1   4 -10   62.72   22.68
  -1   4  10   19.05   23.16
  -1  -4  10   25.94    9.25
  -1  -4  10   62.23   17.09
   1  -4  -9   15.36    9.46
   1   4  -9   -1.61   14.08
  -1   4   9   35.29   15.65
  -1  -4   9    8.15    8.28
  -1  -4   9   10.00   12.71
   1  -4  -8  101.66   16.87
   1  -4  -8  107.02   13.84
   1   4  -8  116.97   18.73
  -1  -4   8   73.19   16.47
  -1  -4   8   86.53   12.18
  -1   4   8   91.31   18.40
   1  -4  -7   15.09    8.23
   1   4  -7   -6.14   13.42
   1  -4  -7   24.04    9.44
  -1  -4   7    7.30    7.86
  -1   4   7   12.68   14.73
  -1  -4   7   -7.04   10.59
   1  -4  -6    2.38   10.41
   1   4  -6   26.53   12.30
   1  -4  -6   25.01    7.96
  -1   4   6   45.99   14.02
  -1  -4   6   36.57   10.78
  -1  -4   6    6.99    9.14
   1   4  -5    9.55    8.43
   1  -4  -5   22.41    9.39
  -1   4   5   10.57    7.36
  -1  -4   5    5.15    8.37
  -1  -4   5    2.63    6.59
  -1   4   5    7.26    9.28
   1  -4  -4  145.63   15.71
   1   4  -4  114.22   13.50
  -1   4   4  105.82   10.13
  -1  -4   4  115.42   13.49
  -1  -4   4   92.02   11.73
  -1   4   4  111.25   14.55
   1  -4  -3  476.82   26.01
   1   4  -3  453.30   18.78
  -1   4   3  449.51   17.16
  -1   4   3  422.93   20.61
  -1  -4   3  430.99   17.92
  -1  -4   3  459.63   22.80
   1  -4  -2  458.65   23.44
   1   4  -2  474.98   16.46
  -1   4   2  437.89   18.70
  -1  -4   2  412.79   22.84
  -1   4   2  469.42   17.34
  -1  -4   2  444.22   17.79
   1   4  -1  128.22    7.09
   1   4  -1  137.30   11.93
   1  -4  -1  135.28   17.50
  -1   4   1  110.62    9.72
  -1  -4   1  128.72   14.86
  -1   4   1  103.65    9.80
   1  -4   0  946.21   34.18
   1   4   0 1055.06   30.84
   1   4   0 1104.92   18.77
  -1   4   0 1087.92   24.89
  -1   4   0 1053.76   28.69
  -1  -4   0 1044.41   34.49
   1  -4   1  564.11   27.62
   1   4   1  541.10   10.62
   1   4   1  537.53   23.42
  -1  -4  -1  546.00   23.58
  -1   4  -1  518.88   19.46
  -1   4  -1  547.41   15.69
   1  -4   2  694.76   27.13
   1  -4   2  699.93   18.36
   1   4   2  704.28   27.99
   1   4   2  680.14   13.08
  -1  -4  -2  684.93   26.51
  -1   4  -2  696.99   25.39
   1  -4   3  198.29   10.56
   1  -4   3  209.33   15.89
   1   4   3  185.08   15.98
  -1   4  -3  181.37   15.06
  -1  -4  -3  200.70   16.53
  -1  -4  -3  200.03    7.44
   1  -4   4   13.40   11.03
   1  -4   4    2.80    6.01
   1   4   4   25.33   10.13
  -1   4  -4   19.84    8.93
  -1  -4  -4   15.66    4.19
  -1  -4  -4   14.96    9.37
   1  -4   5  260.41   14.76
   1  -4   5  227.38   18.66
   1   4   5  222.81   21.02
  -1   4  -5  229.40   21.81
  -1  -4  -5  242.83   12.23
  -1  -4  -5  242.90   16.84
   1  -4   6   14.17    8.47
   1  -4   6   -2.58   10.76
   1   4   6    1.88   15.81
  -1   4  -6   -0.52   12.05
  -1  -4  -6   23.58    7.75
  -1  -4  -6   38.96   10.57
   1  -4   7 1301.26   41.19
   1  -4   7 1314.75   42.78
   1   4   7 1331.01   54.00
  -1   4  -7 1344.68   52.21
  -1  -4  -7 1301.64   40.94
  -1  -4  -7 1298.87   42.63
   1  -4   8   62.93   14.56
   1  -4   8   54.01   13.62
   1   4   8   39.98   18.97
  -1  -4  -8   54.45   14.23
  -1  -4  -8   68.67   13.40
  -1   4  -8   38.34   18.21
   1  -4   9  822.53   38.18
   1  -4   9  793.38   34.85
   1   4   9  769.29   45.72
  -1   4  -9  886.00   46.48
  -1  -4  -9  846.39   35.37
  -1  -4  -9  797.20   38.43
   1  -4  10   12.57   11.89
   1  -4  10   -7.31   15.55
   1   4  10   67.15   23.50
  -1   4 -10   47.35   17.29
  -1  -4 -10   43.29   15.92
  -1  -4 -10    6.49   10.72
   1  -4  11  558.27   35.80
   1  -4  11  515.03   27.75
   1   4  11  470.49   46.03
  -1  -4 -11  482.73   29.30
  -1  -4 -11  458.19   35.37
  -1   4 -11  498.17   40.53
   1  -4  12  -10.20   10.82
   1  -4  12   23.17   17.24
   1   4  12   24.72   23.94
  -1   4 -12  -10.72   17.39
  -1  -4 -12   26.23   11.62
  -1  -4 -12   25.96   16.80
   1  -4  13  255.20   32.79
   1   4  13  265.72   41.29
  -1   4 -13  311.77   42.35
  -1  -4 -13  212.58   21.95
  -1  -4 -13  284.00   33.95
   1  -4  14   51.58   22.33
   1   4  14   -9.81   24.13
  -1   4 -14   14.66   23.18
  -1  -4 -14    8.72   21.45
   1  -4  15  225.66   36.55
   1   4  15  164.57   40.00
  -1   4 -15  189.29   44.97
  -1  -4 -15  174.30   36.78
   1  -4  16   -8.25   20.19
   1   4  16  -23.40   29.38
  -1   4 -16   10.99   25.01
  -1  -4 -16  -14.99   24.34
   1  -4  17   40.17   30.64
  -1   4 -17   11.84   31.23
   1   5 -17   36.36   37.76
   1  -5 -17    9.64   33.76
  -1   5  17   67.93   30.54
  -1  -5  17   66.30   32.68
   1  -5 -16  -21.89   19.40
   1   5 -16    0.93   26.11
  -1   5  16   14.06   27.96
  -1  -5  16    2.44   18.63
   1  -5 -15   39.67   30.15
   1   5 -15  123.46   36.86
  -1   5  15  104.73   29.34
  -1  -5  15   36.94   28.72
   1  -5 -14   33.59   20.51
   1   5 -14   -4.41   24.16
  -1  -5  14   38.06   18.76
   1  -5 -13  167.29   18.49
   1  -5 -13  172.53   30.52
   1   5 -13  153.48   31.50
  -1   5  13  178.50   37.15
  -1  -5  13  132.05   28.34
   1   5 -12   82.44   29.28
   1  -5 -12   66.43   23.16
   1  -5 -12   67.12   14.73
  -1   5  12   95.70   25.75
  -1  -5  12  100.89   19.97
   1   5 -11  285.75   32.84
   1  -5 -11  250.94   21.38
   1  -5 -11  256.59   30.19
  -1  -5  11  266.03   25.08
  -1  -5  11  249.33   19.08
  -1   5  11  303.34   34.05
   1   5 -10  263.89   30.75
   1  -5 -10  240.27   26.00
   1  -5 -10  279.37   23.14
  -1  -5  10  262.04   27.43
  -1  -5  10  279.19   20.57
  -1   5  10  266.39   36.60
   1  -5  -9  279.89   23.31
   1  -5  -9  293.79   25.81
   1   5  -9  296.74   30.09
  -1  -5   9  293.04   27.00
  -1  -5   9  311.87   22.89
  -1   5   9  245.89   35.11
   1  -5  -8   50.65   12.27
   1  -5  -8   -3.91   11.92
   1   5  -8   63.17   17.11
  -1   5   8   -5.76   14.79
  -1  -5   8  -11.31   12.62
  -1  -5   8    2.26   12.27
   1  -5  -7  458.22   26.27
   1   5  -7  477.51   33.05
   1  -5  -7  510.25   29.14
  -1   5   7  499.40   36.34
  -1  -5   7  469.90   25.14
  -1  -5   7  432.29   26.95
   1  -5  -6   70.43   15.21
   1   5  -6   24.09   12.05
  -1   5   6   36.15   10.50
  -1  -5   6   31.09   13.56
  -1  -5   6   44.41   12.45
  -1   5   6   30.17   17.56
   1  -5  -5 1004.95   38.80
   1   5  -5  954.20   36.72
  -1   5   5  992.76   39.89
  -1   5   5  925.28   30.84
  -1  -5   5  920.78   34.17
  -1  -5   5  947.75   36.75
   1   5  -4  122.72   14.47
   1  -5  -4  136.73   17.89
  -1   5   4  143.20   12.01
  -1   5   4  125.04   17.66
  -1  -5   4  139.11   12.68
  -1  -5   4  145.28   16.03
   1  -5  -3  624.64   31.99
   1   5  -3  652.95   24.10
  -1   5   3  632.23   27.54
  -1   5   3  649.35   22.51
  -1  -5   3  646.47   32.20
  -1  -5   3  653.05   26.45
   1   5  -2    6.57    6.26
   1  -5  -2    7.09   12.95
  -1   5   2    5.75    6.62
  -1   5   2    9.06    6.99
  -1  -5   2   10.89    4.85
  -1  -5   2    6.59    9.69
   1  -5  -1  318.82   26.45
   1   5  -1  319.02   18.26
   1   5  -1  348.29   12.57
  -1  -5   1  309.96   21.07
  -1   5   1  342.62   17.40
  -1   5   1  332.69   15.95
   1   5   0  103.86    6.33
   1  -5   0   78.42   18.98
   1   5   0  119.17   12.61
  -1   5   0  106.15   10.39
  -1   5   0  106.55   11.66
  -1  -5   0  103.69   17.25
   1  -5   1  322.56   23.24
   1   5   1  306.31    9.72
   1   5   1  321.61   21.51
  -1  -5  -1  318.11   21.09
  -1   5  -1  270.93   17.16
  -1   5  -1  309.67   14.40
   1  -5   2  153.38   17.92
   1  -5   2  139.70   10.71
   1   5   2  127.99   15.43
   1   5   2  145.38    6.60
  -1   5  -2  127.36   12.52
  -1  -5  -2  161.42   18.41
   1  -5   3  252.89   12.82
   1   5   3  285.61   20.50
   1  -5   3  260.97   24.06
  -1   5  -3  255.87   20.85
  -1  -5  -3  257.74   21.20
   1  -5   4   28.06   14.36
   1  -5   4   23.08    7.46
   1   5   4   15.22   14.72
  -1   5  -4    6.16   10.44
  -1  -5  -4   22.64    5.33
  -1  -5  -4   44.02   12.66
   1   5   5  275.81   24.18
   1  -5   5  309.81   16.28
   1  -5   5  251.46   21.58
  -1  -5  -5  256.43   22.14
  -1   5  -5  300.23   22.64
  -1  -5  -5  239.58   12.07
   1  -5   6   15.71    7.84
   1  -5   6   13.48   12.58
   1   5   6  -14.57   15.36
  -1   5  -6   16.39   14.17
  -1  -5  -6   -2.03    9.56
  -1  -5  -6    0.35    5.76
   1   5   7   13.64   17.20
   1  -5   7   42.36   11.68
   1  -5   7   37.06   16.04
  -1   5  -7   14.19   19.20
  -1  -5  -7   27.32   13.42
  -1  -5  -7   28.14    9.05
   1  -5   8  165.00   22.47
   1  -5   8  171.91   18.38
   1   5   8  211.06   28.58
  -1   5  -8  159.37   25.38
  -1  -5  -8  211.26   21.33
  -1  -5  -8  165.69   18.39
   1  -5   9   78.85   16.90
   1  -5   9   70.47   17.04
   1   5   9  100.99   24.08
  -1   5  -9   51.77   22.08
  -1  -5  -9   80.30   16.72
  -1  -5  -9   77.34   16.69
   1  -5  10  188.57   22.29
   1  -5  10  157.71   22.27
   1   5  10  104.37   32.01
  -1   5 -10  149.73   33.64
  -1  -5 -10  211.96   21.56
  -1  -5 -10  162.84   21.52
   1   5  11   16.16   17.70
   1  -5  11   32.76   13.76
   1  -5  11  -10.52   12.63
  -1  -5 -11   -1.26   12.06
  -1   5 -11   12.00   16.99
  -1  -5 -11  -11.05   13.36
   1  -5  12  166.73   20.27
   1  -5  12  206.66   24.09
   1   5  12  204.50   34.99
  -1   5 -12  181.31   32.54
  -1  -5 -12  197.10   23.34
  -1  -5 -12  206.70   27.25
   1   5  13   35.70   27.59
   1  -5  13   27.15   22.31
  -1   5 -13   32.61   30.53
  -1  -5 -13   49.12   16.37
  -1  -5 -13   84.05   22.70
   1  -5  14   68.90   24.87
   1   5  14   32.44   32.79
  -1   5 -14   69.61   32.55
  -1  -5 -14    9.64   24.47
   1  -5  15   -1.04   15.56
   1   5  15   14.58   25.30
  -1  -5 -15    8.78   19.65
  -1   5 -15  -10.64   20.35
   1   5  16   32.55   31.69
   1  -5  16   78.31   30.30
  -1   5 -16   21.96   36.91
   1  -6 -16   -3.23   25.75
   1   6 -16   49.75   31.83
  -1   6  16   54.12   34.94
  -1  -6  16   -3.19   21.73
   1   6 -15   60.33   30.36
   1  -6 -15   50.94   25.52
  -1   6  15  121.54   30.53
  -1  -6  15   16.27   27.88
   1  -6 -14   99.89   32.59
   1   6 -14  129.33   38.54
  -1   6  14  179.85   41.75
  -1  -6  14  187.72   32.64
   1  -6 -13   -1.36   11.06
   1  -6 -13    2.93   18.09
   1   6 -13   25.53   18.95
  -1   6  13    5.65   19.75
  -1  -6  13    5.40   18.05
   1  -6 -12  248.88   24.20
   1  -6 -12  263.97   32.52
   1   6 -12  215.51   40.42
  -1   6  12  335.25   45.04
  -1  -6  12  289.02   34.00
   1  -6 -11    3.32   14.08
   1   6 -11  -13.16   18.34
   1  -6 -11   -0.02   11.64
  -1  -6  11   -9.62   13.92
  -1   6  11  -18.69   20.26
  -1  -6  11    4.82   10.22
   1  -6 -10  538.63   33.73
   1  -6 -10  505.46   34.85
   1   6 -10  574.98   44.43
  -1  -6  10  526.49   31.85
  -1   6  10  587.39   47.68
  -1  -6  10  522.48   36.64
   1  -6  -9   67.60   17.69
   1  -6  -9   73.15   18.04
   1   6  -9   57.91   20.12
  -1  -6   9   96.85   15.74
  -1   6   9   74.10   27.49
  -1  -6   9   32.56   17.69
   1  -6  -8 1124.09   44.71
   1  -6  -8 1142.96   48.07
   1   6  -8 1066.85   49.68
  -1  -6   8 1084.50   43.97
  -1   6   8 1040.97   53.29
  -1  -6   8 1033.20   47.57
   1  -6  -7  172.84   19.20
   1  -6  -7  175.36   24.16
   1   6  -7  194.96   25.65
  -1   6   7  156.07   28.25
  -1  -6   7  205.21   24.29
  -1  -6   7  145.71   20.60
   1  -6  -6 1605.60   60.98
   1   6  -6 1720.88   58.44
  -1  -6   6 1655.83   60.77
  -1   6   6 1649.23   47.45
  -1  -6   6 1654.15   52.93
  -1   6   6 1676.82   63.83
   1  -6  -5    2.70   15.75
   1   6  -5   10.06   12.39
  -1   6   5    5.43    9.05
  -1  -6   5    5.32    9.20
  -1   6   5   68.19   15.94
  -1  -6   5   39.30   15.51
   1   6  -4 1123.88   38.24
   1  -6  -4 1147.65   48.36
  -1  -6   4 1136.48   38.64
  -1   6   4 1105.92   43.65
  -1  -6   4 1123.50   49.54
  -1   6   4 1135.95   34.91
   1  -6  -3   55.50   16.65
   1   6  -3   35.49   11.13
  -1   6   3   56.22   13.81
  -1  -6   3   80.12   19.11
  -1  -6   3   68.60   14.08
  -1   6   3   49.74    9.99
   1  -6  -2  413.65   30.49
   1   6  -2  426.05   23.17
   1   6  -2  412.64   18.40
  -1   6   2  415.18   19.54
  -1   6   2  452.83   23.77
  -1  -6   2  399.47   28.14
   1  -6  -1   -4.12   14.43
   1   6  -1   14.76    9.62
   1   6  -1   -4.26    5.21
  -1   6   1   -4.91    6.50
  -1  -6   1  -14.97   12.18
  -1   6   1    0.30    7.76
   1   6   0  475.73   28.54
   1   6   0  544.16   16.36
   1  -6   0  481.45   37.09
  -1   6   0  495.79   22.07
  -1   6   0  518.05   23.03
  -1  -6   0  492.98   30.09
   1   6   1   17.37   10.30
   1   6   1   -1.00    3.47
   1  -6   1   -3.41   14.43
  -1   6  -1   -5.47    6.66
  -1   6  -1   -1.43    7.60
  -1  -6  -1  -10.66    9.35
   1  -6   2  248.83   25.30
   1   6   2  244.93    9.49
   1   6   2  247.79   23.34
  -1   6  -2  246.98   15.99
  -1  -6  -2  267.31   25.09
  -1   6  -2  266.75   18.17
   1  -6   3  131.13   21.92
   1  -6   3  137.21   13.10
   1   6   3  138.74   18.60
   1   6   3  139.42    8.33
  -1   6  -3  133.53   15.57
  -1  -6  -3  172.40   19.07
   1  -6   4   98.45   12.23
   1  -6   4  132.56   23.44
   1   6   4  102.89   18.40
  -1   6  -4  140.24   19.25
  -1  -6  -4   96.07    8.42
  -1  -6  -4   99.49   20.80
   1  -6   5   26.16    8.80
   1  -6   5   -4.02   16.56
   1   6   5   17.29   17.34
  -1   6  -5   21.81   16.28
  -1  -6  -5   -3.84   11.65
  -1  -6  -5   13.39    5.60
   1  -6   6   46.04   12.53
   1   6   6   90.51   23.43
   1  -6   6   64.07   20.60
  -1   6  -6   68.77   17.64
  -1  -6  -6   59.11    8.79
  -1  -6  -6   68.13   15.66
   1  -6   7   14.85   12.65
   1   6   7    5.08   12.54
   1  -6   7   -1.11    7.81
  -1   6  -7    1.73   13.68
  -1  -6  -7  -16.17   11.54
  -1  -6  -7    1.09    5.92
   1  -6   8   25.70   18.26
   1   6   8   -2.27   20.35
   1  -6   8   32.62   13.06
  -1   6  -8    4.12   18.16
  -1  -6  -8   67.41   16.78
  -1  -6  -8   25.74   10.37
   1  -6   9   85.97   17.10
   1  -6   9   84.40   22.06
   1   6   9  108.82   29.63
  -1   6  -9   97.50   22.68
  -1  -6  -9   63.58   14.82
  -1  -6  -9   85.13   19.74
   1  -6  10   16.67   15.41
   1   6  10   56.14   21.78
   1  -6  10   15.94   17.26
  -1   6 -10   36.27   18.96
  -1  -6 -10    5.87   13.97
  -1  -6 -10   46.49   15.96
   1  -6  11   39.75   18.47
   1  -6  11   45.45   15.87
   1   6  11   11.44   29.88
  -1  -6 -11   42.57   16.78
  -1  -6 -11   65.35   18.09
  -1   6 -11   45.95   28.13
   1  -6  12   18.19   17.26
   1   6  12   14.02   27.35
  -1  -6 -12   53.28   16.54
  -1  -6 -12   -7.72   15.29
  -1   6 -12   12.03   26.06
   1  -6  13   24.47   20.02
   1   6  13   13.56   31.18
  -1  -6 -13    0.61   19.30
  -1   6 -13   90.67   29.51
  -1  -6 -13    7.47   15.07
   1  -6  14   93.45   26.11
   1   6  14   81.67   38.61
  -1   6 -14   25.81   38.17
   1  -6  15   39.37   25.68
   1   6  15   -3.48   35.35
  -1   6 -15   30.71   28.38
   1   6  16    8.52   32.99
  -1   6 -16   94.93   39.99
   1   7 -16  -12.54   30.25
  -1   7  16   35.54   38.84
  -1  -7  16   87.69   31.95
   1   7 -15   12.64   34.43
  -1   7  15   26.88   30.42
  -1  -7  15   34.51   27.28
   1  -7 -14  111.27   28.05
   1   7 -14   32.42   27.45
  -1   7  14   86.96   38.57
  -1  -7  14   29.70   27.54
   1   7 -13  126.69   36.71
   1  -7 -13  111.15   28.32
   1  -7 -13   95.70   22.40
  -1  -7  13   99.75   28.76
  -1   7  13  132.55   33.26
   1  -7 -12   69.38   20.91
   1   7 -12   74.30   31.17
   1  -7 -12   23.84   22.87
  -1  -7  12   51.85   24.59
  -1   7  12  163.55   35.57
   1  -7 -11  188.02   24.86
   1   7 -11  167.52   35.99
   1  -7 -11  172.42   25.56
  -1   7  11  235.93   39.23
  -1  -7  11  145.60   24.48
  -1  -7  11  116.80   27.72
   1   7 -10   34.70   22.93
   1  -7 -10   59.62   15.97
   1  -7 -10   46.96   17.44
  -1  -7  10   12.34   18.34
  -1   7  10   30.09   27.61
  -1  -7  10   30.76   18.24
   1  -7  -9   40.05   20.51
   1  -7  -9   36.47   16.55
   1   7  -9   82.05   20.58
  -1  -7   9   43.20   19.26
  -1  -7   9   50.47   20.51
  -1   7   9   83.69   28.11
   1  -7  -8   45.02   15.63
   1  -7  -8   22.96   14.16
   1   7  -8   45.71   20.83
  -1  -7   8   29.68   16.18
  -1  -7   8   27.75   20.89
  -1   7   8   52.14   20.42
   1   7  -7 1056.82   47.98
   1  -7  -7  979.53   52.37
  -1   7   7 1020.62   57.18
  -1  -7   7 1025.62   45.24
  -1  -7   7  991.41   53.07
   1  -7  -6    9.13   18.76
   1   7  -6   49.53   16.00
  -1   7   6    5.87   11.00
  -1   7   6   12.12   18.27
  -1  -7   6   17.57   12.91
  -1  -7   6   14.82   19.06
   1   7  -5  973.65   42.54
   1  -7  -5  952.49   48.90
  -1   7   5  927.19   44.49
  -1  -7   5  955.73   42.12
  -1   7   5  960.89   34.30
  -1  -7   5  970.30   50.56
   1  -7  -4  165.36   24.83
   1   7  -4  118.47   17.17
  -1   7   4  115.39   17.74
  -1  -7   4   73.11   25.34
  -1  -7   4  134.06   16.72
  -1   7   4  101.12   13.06
   1   7  -3  316.20   20.83
   1   7  -3  313.01   22.26
   1  -7  -3  351.61   36.54
  -1  -7   3  262.11   33.39
  -1   7   3  327.17   18.05
  -1   7   3  323.09   26.37
   1   7  -2  434.30   29.54
   1   7  -2  454.12   20.75
   1  -7  -2  398.56   38.35
  -1   7   2  475.47   28.07
  -1   7   2  452.25   22.91
  -1  -7   2  463.32   31.92
   1   7  -1  109.52   16.43
   1   7  -1  101.24    9.97
   1  -7  -1  152.39   26.89
  -1   7   1   83.27   16.62
  -1   7   1  123.98   14.23
  -1  -7   1   98.30   23.49
   1   7   0   65.02   17.01
   1  -7   0   30.71   19.86
   1   7   0   35.98    6.38
  -1   7   0   29.34   12.09
  -1   7   0   31.89   10.97
  -1  -7   0   49.08   19.67
   1   7   1  194.21   20.09
   1   7   1  177.19    9.79
   1  -7   1  174.02   31.29
  -1  -7  -1  196.80   24.14
  -1   7  -1  190.21   18.44
  -1   7  -1  200.97   17.60
   1  -7   2   91.81   21.66
   1   7   2   55.54   17.24
   1   7   2   78.42    6.82
  -1  -7  -2   60.46   17.64
  -1   7  -2   79.02   13.39
  -1   7  -2   90.76   13.56
   1  -7   3  333.53   37.27
   1   7   3  259.55   26.36
   1   7   3  311.63   13.16
  -1  -7  -3  337.30   28.09
  -1   7  -3  328.64   26.46
  -1   7  -3  300.47   20.53
   1  -7   4  278.76   30.32
   1   7   4  269.28   29.63
   1  -7   4  267.83   18.96
  -1   7  -4  272.34   26.16
  -1  -7  -4  235.99   25.26
  -1  -7  -4  257.96   12.36
   1  -7   5  283.66   18.72
   1  -7   5  240.25   34.31
   1   7   5  256.64   33.88
  -1  -7  -5  307.96   31.29
  -1  -7  -5  244.85   12.50
  -1   7  -5  265.81   25.66
   1  -7   6   81.98   14.58
   1  -7   6  113.93   27.08
   1   7   6   84.70   22.63
  -1   7  -6   60.18   19.62
  -1  -7  -6   80.73   18.31
  -1  -7  -6   61.27    8.97
   1   7   7   10.20   18.15
   1  -7   7   20.78   20.83
   1  -7   7   13.08   12.13
  -1  -7  -7   28.75    9.51
  -1   7  -7   45.16   17.37
  -1  -7  -7   -1.63   17.44
   1  -7   8   96.98   17.50
   1  -7   8   66.85   25.22
   1   7   8   78.95   24.31
  -1   7  -8   83.78   22.45
  -1  -7  -8   61.46   22.66
  -1  -7  -8   96.58   13.66
   1   7   9  154.27   29.68
   1  -7   9  130.70   19.99
   1  -7   9   96.16   26.68
  -1  -7  -9  149.08   20.29
  -1  -7  -9   82.17   16.28
  -1   7  -9   86.03   29.99
   1  -7  10   53.75   24.72
   1  -7  10   71.30   19.14
   1   7  10   39.29   32.59
  -1   7 -10   76.73   28.97
  -1  -7 -10   53.67   21.42
  -1  -7 -10   64.57   15.17
   1  -7  11    1.02   14.84
   1  -7  11   -0.37   18.86
   1   7  11   -3.78   21.26
  -1  -7 -11   21.11   16.17
  -1   7 -11    9.08   19.32
  -1  -7 -11    6.54   13.25
   1  -7  12   15.61   18.16
   1   7  12   31.90   25.49
  -1  -7 -12   -2.35   18.83
  -1   7 -12   41.65   27.74
   1  -7  13  -11.78   16.49
   1   7  13   22.03   22.66
  -1  -7 -13   -5.33   15.29
  -1   7 -13   26.56   23.89
   1   7  14   94.10   34.61
  -1   7 -14   20.82   35.47
   1   7  15   82.80   44.42
  -1   7 -15   83.39   35.90
   1   8 -15  -14.04   28.46
  -1   8  15   -5.06   37.58
  -1  -8  15   73.57   27.90
   1   8 -14   37.13   39.27
  -1   8  14   59.97   34.59
  -1  -8  14   70.40   24.44
   1  -8 -13   89.49   24.75
   1   8 -13   67.10   36.95
  -1  -8  13   93.69   28.59
  -1   8  13   81.58   41.28
   1   8 -12   76.26   30.19
   1  -8 -12   41.67   21.91
   1  -8 -12   19.31   22.23
  -1   8  12   23.13   27.38
  -1  -8  12   74.29   23.98
   1  -8 -11   72.65   20.23
   1  -8 -11   48.81   21.00
   1   8 -11   50.32   24.00
  -1  -8  11   84.21   23.11
  -1  -8  11   23.16   20.19
  -1   8  11   39.30   26.95
   1   8 -10   53.67   25.06
   1  -8 -10    1.80   17.44
   1  -8 -10   23.74   21.52
  -1   8  10   37.70   22.33
  -1  -8  10   31.95   21.03
  -1  -8  10   55.88   20.60
   1  -8  -9   59.05   25.36
   1   8  -9   74.88   27.38
   1  -8  -9  107.64   19.12
  -1  -8   9   91.05   27.34
  -1  -8   9  116.07   19.02
  -1   8   9  122.73   27.15
   1   8  -8   45.69   17.96
   1  -8  -8    1.26   12.34
  -1  -8   8   -6.48   14.23
  -1   8   8   23.70   21.53
  -1  -8   8  -11.19   19.10
   1   8  -7  -10.91   17.09
   1  -8  -7    4.71   16.43
  -1  -8   7   27.13   16.45
  -1  -8   7   19.27   15.21
  -1   8   7   16.56   16.82
  -1   8   7    9.36    9.61
   1   8  -6  429.93   33.56
   1  -8  -6  474.39   41.97
  -1  -8   6  406.28   40.65
  -1   8   6  409.71   34.09
  -1   8   6  444.45   26.26
  -1  -8   6  425.55   32.63
   1  -8  -5  154.35   27.52
   1   8  -5  200.14   23.52
  -1  -8   5  202.78   24.86
  -1  -8   5  160.26   31.61
  -1   8   5  150.43   15.29
  -1   8   5  193.46   27.64
   1   8  -4  422.24   30.90
   1   8  -4  369.63   27.38
   1  -8  -4  472.66   43.05
  -1  -8   4  453.08   42.62
  -1   8   4  461.06   34.93
  -1   8   4  435.14   24.62
   1   8  -3  776.85   33.39
   1   8  -3  745.70   40.81
   1  -8  -3  753.83   55.95
  -1  -8   3  802.57   48.48
  -1   8   3  741.46   30.56
  -1   8   3  762.87   41.00
   1   8  -2  244.47   25.75
   1  -8  -2  168.98   36.73
   1   8  -2  203.74   16.26
  -1   8   2  207.93   18.34
  -1   8   2  182.75   23.46
  -1  -8   2  238.58   32.77
   1   8  -1  783.88   27.71
   1  -8  -1  784.43   50.17
   1   8  -1  696.28   40.12
  -1  -8   1  719.86   49.99
  -1   8   1  690.22   35.64
  -1   8   1  774.60   33.13
   1   8   0   44.49   16.20
   1   8   0   42.65    8.57
   1  -8   0   58.69   22.07
  -1   8   0   93.47   14.87
  -1   8   0   27.17   13.48
  -1  -8   0   46.71   23.44
   1   8   1  101.73    8.95
   1   8   1   63.53   22.72
   1  -8   1  138.18   33.48
  -1   8  -1  136.05   18.50
  -1  -8  -1   69.12   22.24
  -1   8  -1   83.46   17.68
   1  -8   2   87.61   26.70
   1   8   2   94.23    8.50
   1   8   2  129.75   20.46
  -1  -8  -2   64.38   22.20
  -1   8  -2  137.40   19.38
  -1   8  -2  108.71   16.46
   1  -8   3  444.14   43.46
   1   8   3  298.10   34.15
   1   8   3  325.71   14.93
  -1  -8  -3  331.17   32.72
  -1   8  -3  363.92   28.89
  -1   8  -3  332.61   23.62
   1   8   4  223.09   13.10
   1   8   4  297.99   33.72
   1  -8   4  312.33   34.99
  -1   8  -4  288.18   21.01
  -1   8  -4  283.33   25.38
  -1  -8  -4  264.67   33.81
   1   8   5  373.15   34.36
   1  -8   5  342.40   24.32
   1  -8   5  271.59   35.66
  -1  -8  -5  331.79   35.46
  -1   8  -5  296.27   31.41
   1   8   6   18.03   17.08
   1  -8   6  -20.13   21.16
   1  -8   6   15.20    9.86
  -1  -8  -6   -4.21   14.73
  -1   8  -6    7.21   17.36
   1  -8   7   80.67   15.85
   1  -8   7   65.26   27.89
   1   8   7   61.88   27.77
  -1  -8  -7   40.94   18.93
  -1   8  -7   20.65   20.40
   1  -8   8   32.28   15.21
   1  -8   8   16.89   24.73
   1   8   8   10.83   21.71
  -1   8  -8   19.52   19.46
  -1  -8  -8   50.25   21.01
   1   8   9  221.20   40.24
   1  -8   9  165.34   35.10
   1  -8   9  221.01   25.23
  -1  -8  -9  227.92   27.88
  -1   8  -9  187.83   37.10
   1   8  10   63.95   27.02
   1  -8  10   66.99   26.74
   1  -8  10   43.09   19.34
  -1   8 -10   73.14   30.50
  -1  -8 -10   38.08   23.06
   1   8  11  265.46   48.64
   1  -8  11  246.99   30.70
   1  -8  11  259.73   34.32
  -1  -8 -11  264.42   34.28
  -1   8 -11  300.83   46.37
   1  -8  12   26.53   20.58
   1   8  12   11.15   33.73
  -1   8 -12    8.77   24.77
  -1  -8 -12   53.17   22.60
   1   8  13  186.82   46.77
   1  -8  13  147.44   29.81
  -1  -8 -13  144.59   30.56
  -1   8 -13  140.29   37.00
   1   8  14   19.30   38.04
  -1   8 -14   23.89   37.05
   1   9 -14   80.31   39.90
  -1   9  14   44.77   34.21
  -1  -9  14   54.92   31.18
   1   9 -13   30.21   35.83
   1  -9 -13   56.38   25.08
  -1  -9  13    6.14   25.95
  -1   9  13   44.61   37.66
   1   9 -12   57.28   25.33
   1  -9 -12   28.64   24.26
  -1  -9  12    7.76   23.95
  -1   9  12   23.34   33.02
   1   9 -11  -21.32   23.49
   1  -9 -11    4.28   17.02
  -1  -9  11   39.47   20.82
  -1  -9  11    7.41   18.98
  -1   9  11    1.27   22.03
   1  -9 -10   28.87   15.46
   1   9 -10   14.30   26.93
   1  -9 -10   63.51   24.84
  -1  -9  10   31.58   21.28
  -1  -9  10   21.04   25.05
  -1   9  10   33.03   25.76
   1   9  -9   52.17   24.62
   1  -9  -9   43.56   15.43
   1  -9  -9   -7.35   24.76
  -1  -9   9   11.33   24.63
  -1  -9   9   20.18   20.60
  -1   9   9   34.24   24.34
   1  -9  -8    7.13   13.43
   1   9  -8   24.14   20.64
   1  -9  -8   -8.85   17.94
  -1  -9   8   54.29   22.54
  -1  -9   8    1.77   17.46
  -1   9   8   15.65   24.38
   1  -9  -7  256.68   38.55
   1   9  -7  297.03   32.47
  -1  -9   7  256.98   38.09
  -1   9   7  226.11   22.22
  -1   9   7  253.96   32.03
  -1  -9   7  276.18   29.77
   1   9  -6   31.60   20.76
   1  -9  -6   36.02   21.43
  -1  -9   6   58.72   28.01
  -1  -9   6   52.28   19.97
  -1   9   6   55.90   14.99
  -1   9   6   75.12   24.61
   1   9  -5   49.71   19.02
   1   9  -5  106.82   22.05
   1  -9  -5   81.89   24.25
  -1  -9   5   62.04   29.46
  -1   9   5   64.31   13.95
  -1   9   5   65.58   23.96
   1   9  -4   13.84   13.87
   1   9  -4   44.09   18.36
   1  -9  -4   35.79   20.57
  -1   9   4   -7.90   11.89
  -1  -9   4   55.40   24.67
  -1   9   4   58.56   18.38
   1  -9  -3  -15.38   24.28
   1   9  -3    3.05   13.33
   1   9  -3   -1.31   12.13
  -1   9   3    5.42    8.99
  -1  -9   3   86.43   22.78
  -1   9   3   15.63   15.88
   1   9  -2   46.83   20.54
   1  -9  -2   60.58   24.77
   1   9  -2   55.20   12.74
  -1   9   2   67.31   19.71
  -1  -9   2   83.62   23.81
  -1   9   2   30.22   13.79
   1   9  -1   11.67    7.00
   1  -9  -1  -21.59   21.93
   1   9  -1    2.28   15.48
  -1  -9   1   16.29   18.99
  -1   9   1   -8.64   12.55
  -1   9   1   -9.38    9.99
   1   9   0   39.43    8.75
   1   9   0   48.38   21.79
   1  -9   0   61.99   32.21
  -1   9   0   97.43   18.08
  -1  -9   0   33.71   26.29
  -1   9   0   63.14   15.47
   1   9   1   75.82    9.01
   1   9   1   92.13   24.68
   1  -9   1  123.40   34.15
  -1  -9  -1  148.66   29.79
  -1   9  -1   79.23   18.71
  -1   9  -1  106.62   18.66
   1   9   2  109.73   26.46
   1   9   2  125.66   10.54
   1  -9   2  129.46   30.45
  -1  -9  -2  128.76   27.01
  -1   9  -2  135.65   20.98
  -1   9  -2  157.99   21.77
   1   9   3   61.87   18.74
   1  -9   3  -23.28   28.60
  -1   9  -3   22.39   14.46
  -1  -9  -3   29.82   18.84
  -1   9  -3   35.53   17.39
   1   9   4  311.97   37.12
   1  -9   4  341.07   45.46
  -1  -9  -4  290.28   33.61
  -1   9  -4  315.25   24.28
  -1   9  -4  341.40   31.95
   1   9   5   20.39   15.44
   1  -9   5   13.58   21.26
  -1  -9  -5   36.87   17.88
  -1   9  -5  -15.88   15.19
  -1   9  -5  -13.53   10.80
   1   9   6   51.06   22.53
   1  -9   6   17.14   16.07
   1  -9   6   60.47   24.58
  -1  -9  -6   79.21   24.15
  -1   9  -6   42.59   22.70
   1   9   7   -5.62   20.61
   1  -9   7    4.02   13.97
   1  -9   7   89.96   25.34
  -1  -9  -7    0.30   21.18
  -1   9  -7    7.69   17.61
   1   9   8  108.01   36.03
   1  -9   8  114.93   35.60
   1  -9   8  110.35   21.82
  -1  -9  -8  137.87   31.12
  -1   9  -8  137.73   27.84
   1  -9   9   -1.29   17.11
   1   9   9   60.44   24.34
   1  -9   9   69.78   27.29
  -1  -9  -9   -0.48   23.87
  -1   9  -9   24.72   27.94
   1   9  10   91.18   41.40
   1  -9  10  140.77   24.32
   1  -9  10  116.96   34.42
  -1  -9 -10  101.65   25.40
  -1   9 -10  130.60   30.81
   1   9  11    3.15   32.95
   1  -9  11    6.63   19.01
   1  -9  11   53.64   24.01
  -1  -9 -11   12.97   22.77
  -1   9 -11    5.13   23.96
   1   9  12  154.42   49.53
  -1  -9 -12  172.09   35.90
  -1   9 -12  258.88   48.40
   1   9  13   -4.52   32.46
   1  10 -13   54.48   41.17
  -1  10  13   51.30   48.10
  -1 -10  13  126.37   32.63
   1 -10 -12   71.61   30.92
   1  10 -12   93.61   29.04
  -1 -10  12   54.07   27.52
  -1  10  12   -7.32   31.33
   1 -10 -11   58.34   30.79
   1  10 -11   66.65   35.09
  -1 -10  11  100.12   27.65
  -1  10  11   -5.30   28.94
   1  10 -10  -11.15   23.42
   1 -10 -10   12.28   18.13
  -1  10  10   30.65   28.09
  -1 -10  10  -10.35   19.44
  -1 -10  10   15.77   20.35
   1 -10  -9    0.98   22.67
   1  10  -9  -16.71   21.59
  -1 -10   9   10.30   18.45
  -1 -10   9   -3.31   21.86
  -1  10   9   41.46   25.60
   1  10  -8  -12.98   21.05
  -1 -10   8  -20.28   24.86
  -1 -10   8  -13.55   20.01
  -1  10   8   -0.91   19.83
   1  10  -7   38.85   17.77
   1 -10  -7    2.72   23.36
  -1 -10   7   10.80   23.76
  -1  10   7    0.69   11.97
  -1 -10   7   -6.03   10.71
  -1  10   7   30.21   23.89
   1  10  -6   45.99   18.71
   1  10  -6    4.93   19.86
   1 -10  -6   -6.15   22.26
  -1 -10   6   26.33   21.08
  -1  10   6   24.58   23.55
  -1  10   6   13.85   12.27
   1  10  -5   30.38   20.29
   1  10  -5   51.72   22.88
   1 -10  -5   93.72   31.67
  -1  10   5   70.00   25.25
  -1 -10   5   71.73   29.89
  -1  10   5   49.55   12.96
   1 -10  -4   55.95   22.37
   1  10  -4    0.30   17.62
   1  10  -4   34.23   12.93
  -1 -10   4  -17.22   25.40
  -1  10   4   26.26   20.21
  -1  10   4   -5.26   11.89
   1  10  -3   14.81   20.04
   1  10  -3   22.32   13.67
   1 -10  -3    8.81   27.42
  -1 -10   3   64.28   26.03
  -1  10   3    4.23   12.32
  -1  10   3   43.68   19.00
   1  10  -2   31.72   13.41
   1  10  -2    3.43   21.51
   1 -10  -2   49.10   25.53
  -1 -10   2   42.02   28.33
  -1  10   2   35.33   13.38
  -1  10   2   55.59   19.68
   1  10  -1   50.26   21.08
   1  10  -1   36.05   11.88
   1 -10  -1   49.60   24.64
  -1  10   1   34.28   14.75
  -1  10   1   43.63   19.57
  -1 -10   1   27.55   22.44
   1  10   0   46.90    9.68
   1  10   0   62.35   23.21
   1 -10   0   55.60   26.25
  -1  10   0   73.81   19.43
  -1 -10   0   63.91   23.58
  -1  10   0   31.73   16.60
   1  10   1  239.06   34.15
   1 -10   1  214.39   45.44
  -1 -10  -1  219.06   39.20
  -1  10  -1  230.63   24.94
  -1  10  -1  213.15   26.28
   1  10   2   -0.83   18.66
   1 -10   2  -17.18   20.42
  -1  10  -2   -2.68   15.01
  -1 -10  -2  -14.16   22.54
  -1  10  -2   -0.79   14.09
   1  10   3  403.60   39.58
   1 -10   3  422.27   46.75
  -1 -10  -3  461.53   42.91
  -1  10  -3  432.49   36.28
  -1  10  -3  447.60   33.35
   1  10   4  -11.01   23.36
   1 -10   4   33.14   23.82
  -1 -10  -4   -2.57   19.67
  -1  10  -4   34.24   16.40
  -1  10  -4   30.18   18.34
   1 -10   5  134.11   31.21
   1  10   5   67.22   30.83
  -1 -10  -5   89.72   30.66
  -1  10  -5   60.89   20.82
  -1  10  -5   69.38   25.78
   1  10   6   -1.00   20.73
   1 -10   6   29.46   29.87
  -1  10  -6   31.14   22.69
  -1 -10  -6   66.23   25.19
  -1  10  -6    7.28   15.65
   1  10   7  111.34   35.26
   1 -10   7   56.96   35.69
  -1 -10  -7   92.31   26.81
  -1  10  -7   52.23   24.75
   1 -10   8   41.25   18.68
   1  10   8   -4.71   28.20
   1 -10   8   37.00   29.33
  -1 -10  -8  -12.36   21.26
  -1  10  -8   28.72   21.01
   1 -10   9  105.44   39.37
   1  10   9  141.69   41.35
   1 -10   9  109.88   25.09
  -1 -10  -9  116.32   29.24
  -1  10  -9  125.85   36.28
   1 -10  10   11.28   25.76
   1  10  10   -3.81   25.06
  -1  10 -10  -17.53   21.97
   1  10  11  171.67   43.31
  -1 -10 -11  156.76   38.92
  -1  10 -11  171.85   46.08
   1  10  12   27.69   27.69
  -1  10 -12    9.47   26.52
  -1 -10 -12   -8.07   24.98
   1  11 -12   43.63   35.90
   1 -11 -12    4.55   31.23
   1  11 -11   41.35   37.53
   1 -11 -11   73.13   35.69
  -1 -11  11   66.67   31.67
  -1  11  11   82.07   34.82
   1  11 -10   10.50   24.93
   1 -11 -10    5.06   26.19
  -1 -11  10   10.78   22.58
  -1 -11  10    3.92   26.28
  -1  11  10   -3.04   24.55
   1  11  -9   80.95   27.23
   1 -11  -9   35.50   29.76
  -1 -11   9  162.73   38.62
  -1 -11   9  106.11   26.43
  -1  11   9  127.11   34.79
   1  11  -8    2.90   22.82
   1  11  -8   20.50   21.82
   1 -11  -8  -10.50   23.14
  -1 -11   8   67.40   28.47
  -1  11   8    6.74   22.85
   1  11  -7   80.53   32.41
   1  11  -7  130.30   28.48
   1 -11  -7  196.68   40.02
  -1 -11   7  167.26   39.58
  -1  11   7   91.63   37.18
   1  11  -6  -10.03   21.75
   1  11  -6   46.60   19.89
   1 -11  -6   -2.34   27.75
  -1 -11   6    7.65   23.47
  -1  11   6   14.78   24.24
   1  11  -5  112.28   25.10
   1  11  -5  163.93   30.38
   1 -11  -5  118.38   35.38
  -1  11   5  153.72   29.09
  -1 -11   5  120.92   39.06
   1  11  -4   79.81   22.25
   1 -11  -4   33.35   33.81
   1  11  -4   45.95   19.04
  -1 -11   4  223.26   37.42
  -1  11   4   58.47   15.26
  -1  11   4   51.20   26.55
   1  11  -3  289.04   25.44
   1  11  -3  331.23   32.91
   1 -11  -3  238.27   50.75
  -1  11   3  287.84   25.69
  -1 -11   3  287.56   41.42
  -1  11   3  309.77   36.90
   1  11  -2   57.03   15.86
   1  11  -2   99.26   23.41
   1 -11  -2   38.93   34.98
  -1 -11   2   53.90   33.26
  -1  11   2   51.07   24.34
  -1  11   2   50.60   14.25
   1  11  -1  231.56   36.44
   1 -11  -1  327.57   50.13
  -1 -11   1  377.91   48.66
  -1  11   1  236.54   32.43
  -1  11   1  279.73   24.16
   1  11   0  114.59   29.35
   1 -11   0   78.33   38.07
  -1 -11   0   91.40   30.46
  -1  11   0   71.68   19.98
  -1  11   0  140.98   25.01
   1  11   1  149.10   31.95
   1 -11   1  136.36   35.00
  -1  11  -1  130.28   22.64
  -1 -11  -1   80.14   30.27
  -1  11  -1   77.73   23.80
   1  11   2   67.28   28.76
   1 -11   2   57.65   29.54
  -1 -11  -2   85.93   31.11
  -1  11  -2   64.94   21.07
  -1  11  -2   24.05   19.93
   1 -11   3   -5.63   24.41
   1  11   3    1.25   23.85
  -1 -11  -3   -8.43   25.72
  -1  11  -3   45.32   18.01
  -1  11  -3   -2.33   16.83
   1  11   4   39.91   31.98
   1 -11   4   64.80   33.51
  -1 -11  -4   73.18   27.65
  -1  11  -4  165.76   27.06
  -1  11  -4   73.64   20.28
   1  11   5   65.40   29.58
   1 -11   5  128.73   41.09
  -1 -11  -5   98.80   28.92
  -1  11  -5   74.06   23.54
  -1  11  -5   98.31   27.86
   1  11   6   97.00   33.30
   1 -11   6   -6.94   37.45
  -1 -11  -6   73.67   33.58
  -1  11  -6   72.37   27.90
  -1  11  -6   50.83   22.05
   1  11   7   10.76   25.33
   1 -11   7    8.63   33.36
  -1 -11  -7   -5.95   23.12
  -1  11  -7   64.25   22.04
   1  11   8   45.24   33.54
   1 -11   8   31.27   34.50
  -1 -11  -8   22.95   25.32
  -1  11  -8   12.37   23.80
   1 -11   9   37.15   35.55
   1  11   9   73.41   36.05
  -1 -11  -9   68.06   33.71
  -1  11  -9   -5.35   25.26
   1 -11  10  162.84   45.52
   1  11  10  193.51   49.55
  -1  11 -10   82.03   42.43
  -1 -11 -10   63.43   39.69
  -1  11 -11  -23.70   32.06
  -1 -11 -11   -1.07   29.01
   1 -12 -10   48.08   40.78
   1  12 -10   61.17   30.67
  -1  12  10  120.64   36.57
   1  12  -9   -1.73   23.51
   1 -12  -9    5.54   22.91
  -1 -12   9  -23.19   28.88
  -1  12   9   -1.09   29.27
   1 -12  -8  171.77   37.60
   1  12  -8  148.75   36.41
   1  12  -8  126.25   36.80
  -1  12   8   90.53   42.44
  -1 -12   8  118.14   37.78
   1  12  -7   -8.57   24.40
   1  12  -7   15.18   22.72
   1 -12  -7    6.55   28.72
  -1  12   7    0.22   26.39
  -1 -12   7   25.84   24.55
   1 -12  -6  261.04   44.76
   1  12  -6  268.88   32.69
   1  12  -6  253.80   42.32
  -1  12   6  246.36   44.48
  -1 -12   6  312.59   51.25
   1  12  -5   25.89   28.25
   1 -12  -5   78.99   37.33
  -1 -12   5   79.95   36.74
  -1  12   5   34.76   29.77
   1  12  -4  163.98   30.68
   1 -12  -4  107.82   44.54
  -1 -12   4   96.65   42.69
  -1  12   4  118.39   34.48
   1 -12  -3   -4.73   30.36
   1  12  -3    1.78   24.57
  -1  12   3    8.88   21.67
  -1 -12   3   29.91   25.33
   1 -12  -2  234.71   49.65
   1  12  -2  162.39   36.91
  -1 -12   2  244.05   41.52
  -1  12   2  179.94   34.96
   1 -12  -1   24.57   35.11
   1  12  -1   -3.86   22.36
  -1  12   1   84.61   23.62
   1  12   0  105.60   32.39
   1 -12   0  105.03   35.90
  -1  12   0  116.45   26.62
  -1  12   0   68.09   21.51
  -1 -12   0  147.65   39.09
   1 -12   1   21.23   21.76
   1  12   1   22.31   19.66
  -1  12  -1  -17.81   14.05
  -1 -12  -1  -15.21   19.95
  -1  12  -1    2.06   15.99
   1 -12   2   32.44   38.52
   1  12   2   -3.65   27.85
  -1  12  -2   11.32   20.77
  -1 -12  -2   41.96   26.98
  -1  12  -2   66.88   22.90
   1  12   3   59.30   25.98
   1 -12   3  121.42   42.89
  -1  12  -3   46.53   23.74
  -1 -12  -3   27.14   34.73
  -1  12  -3   63.54   24.42
   1  12   4  110.92   36.08
   1 -12   4  112.23   39.02
  -1  12  -4  123.43   30.33
  -1 -12  -4   89.71   40.38
   1  12   5   -4.47   23.08
   1 -12   5   47.85   33.12
  -1 -12  -5    9.57   23.84
  -1  12  -5   14.57   22.43
   1  12   6   -4.66   37.51
   1 -12   6  117.56   36.64
  -1  12  -6   60.10   29.98
  -1 -12  -6   56.88   29.96
   1  12   7   -4.67   32.30
   1 -12   7   10.22   35.41
  -1 -12  -7  -12.45   31.34
  -1  12  -7   38.36   22.74
   1  12   8   -1.04   26.84
   1 -12   8   36.35   36.11
  -1  12  -8    9.40   22.90
   1  12   9  -20.84   27.25
   1 -12   9   29.15   27.07
  -1  12  -9  -24.10   23.36
  -1 -12  -9   -0.31   29.86
   1 -13  -7  186.70   56.21
  -1  13   7  243.67   43.05
  -1 -13   7  252.14   54.62
   1 -13  -6  -10.59   34.37
   1  13  -6   44.82   28.22
  -1  13   6  -11.22   24.55
  -1 -13   6   34.18   35.22
   1  13  -5   89.58   38.81
   1 -13  -5  127.64   49.05
  -1 -13   5  106.41   46.69
  -1  13   5  166.94   34.05
   1  13  -4  -10.74   31.62
  -1  13   4   20.33   30.84
  -1 -13   4  149.56   40.54
   1 -13  -3  126.60   47.33
   1  13  -3   76.56   35.90
  -1 -13   3  153.04   39.02
  -1  13   3   90.90   33.93
   1  13  -2   86.18   30.70
   1 -13  -2   28.65   38.24
  -1 -13   2    8.50   31.55
  -1  13   2    9.70   25.34
   1 -13  -1   66.57   35.42
   1  13  -1   30.23   27.35
  -1  13   1   79.88   27.58
  -1 -13   1   16.22   32.67
   1  13   0   60.07   32.09
   1 -13   0   -8.39   42.34
  -1 -13   0   98.75   39.15
   1 -13   1   33.14   40.68
  -1 -13  -1   38.80   37.29
   1  13   2    0.28   28.78
   1 -13   2   -7.01   34.81
  -1 -13  -2   40.88   30.51
   1  13   3  121.04   38.87
   1 -13   3  227.00   51.28
  -1 -13  -3   41.21   34.16
   1 -13   4   11.23   44.49
   1  13   4   -6.39   28.60
  -1 -13  -4  126.72   33.91
   1 -13   5   17.66   31.08
   1  13   5   12.67   33.67
  -1 -13  -5   12.84   25.67
   1  13   6  -11.32   30.75
   1 -13   6   17.28   34.33
  -1 -13  -6    5.17   24.28
   1 -14  -3   38.42   40.94
  -1 -14   3    1.07   30.59
   1 -14  -2  141.98   52.91
  -1 -14   2   88.58   41.72
   1 -14  -1   -6.29   39.35
   1  14  -1   39.08   31.12
  -1 -14   1    9.60   31.47
   1  14   0   63.72   32.58
   1 -14   0   77.63   39.74
  -1 -14   0   90.81   38.42
   1  14   1   73.62   37.81
   1 -14   1   33.40   38.65
  -1 -14  -1   70.05   43.77
   1 -14   2  -32.09   30.02
   1  14   2   29.41   30.22
  -1 -14  -2   23.94   28.23
   2   0 -18  163.74   39.19
  -2   0  18  129.04   42.25
   2   0 -17    2.87   20.38
  -2   0  17   -4.92   17.77
   2   0 -16  311.91   47.45
  -2   0  16  356.08   40.47
   2   0 -15   -1.55   17.91
  -2   0  15    0.36   17.95
   2   0 -14  491.67   47.27
  -2   0  14  538.15   47.32
   2   0 -13   -1.95   14.05
   2   0 -12 1144.35   60.19
  -2   0  12 1103.98   53.53
   2   0 -11   -8.53   14.34
   2   0 -10 1210.13   51.49
  -2   0  10 1254.46   51.61
   2   0  -9    2.63    9.67
   2   0  -8  244.89   19.75
  -2   0   8  222.12   18.45
   2   0  -7   12.63    9.14
  -2   0   7   20.69   10.41
   2   0  -6   28.17    9.91
  -2   0   6    3.18    7.39
   2   0  -5   -1.50    5.38
   2   0  -5    2.01    1.30
   2   0  -5    0.92    0.78
  -2   0   5   -2.13    5.38
   2   0  -4 6047.96   42.19
   2   0  -4 5998.04   83.92
   2   0  -4 6078.86   41.24
  -2   0   4 5939.34   77.99
   2   0  -3    1.20    1.82
  -2   0   3    2.75    2.31
  -2   0   3   14.08    4.46
  -2   0   3    2.56    4.91
   2   0  -2  879.93   16.25
  -2   0   2  973.18   16.72
  -2   0   2  911.45   19.60
  -2   0   2  923.29   17.99
  -2   0   1    7.15    3.00
  -2   0   1   -0.33    2.38
  -2   0   1    2.07    3.09
   2   0   0  337.00    8.41
   2   0   0  300.91    7.88
  -2   0   0  312.40   10.28
  -2   0   0  335.91    9.73
   2   0   1    3.99    3.42
  -2   0  -1    1.24    4.19
  -2   0  -1   -2.94    3.76
   2   0   2  281.88   12.32
  -2   0  -2  284.33   12.76
  -2   0  -2  265.24   12.00
   2   0   3    1.62    6.18
  -2   0  -3   -2.21    6.35
  -2   0  -3    9.99    4.37
   2   0   4    9.25    5.41
  -2   0  -4   -1.99    6.49
  -2   0  -4   -2.15    5.60
   2   0   5    2.43    6.02
  -2   0  -5   -6.46    5.83
  -2   0  -5    1.08    5.11
   2   0   6   -3.65    6.66
  -2   0  -6   -2.34    5.37
  -2   0  -6    6.30    6.97
   2   0   7   10.78    9.67
  -2   0  -7   -0.11    8.18
  -2   0  -7   -3.30    6.01
   2   0   8  505.41   32.60
  -2   0  -8  547.32   24.51
  -2   0  -8  495.14   34.26
   2   0   9   -1.35   11.43
  -2   0  -9   -6.63    8.28
  -2   0  -9    5.03   14.70
   2   0  10  193.39   28.83
  -2   0 -10  200.23   17.98
  -2   0 -10  185.19   29.54
   2   0  11    3.53   14.11
  -2   0 -11   10.46   18.37
   2   0  12  243.27   27.56
   2   0  12  190.29   19.72
  -2   0 -12  227.08   29.73
   2   0  13   10.04   24.02
  -2   0 -13   64.83   26.11
   2   0  14  186.26   34.94
  -2   0 -14  184.65   38.42
   2   0  15   88.11   29.04
  -2   0 -15  -12.14   31.67
   2   0  16  121.46   38.17
  -2   0 -16  145.26   35.39
   2   0  17  -10.91   27.21
  -2   0 -17   25.63   29.89
   2   1 -18   23.40   22.01
   2  -1 -18  -11.06   21.80
  -2   1  18   -7.38   22.13
  -2  -1  18  -14.42   21.19
   2  -1 -17  161.61   41.24
   2   1 -17  167.80   36.72
  -2   1  17  171.48   41.88
  -2  -1  17  135.05   33.57
   2  -1 -16   37.35   28.21
   2   1 -16   -5.49   29.04
  -2   1  16   18.37   23.35
  -2  -1  16   47.44   22.82
   2   1 -15  298.76   42.33
   2  -1 -15  191.73   34.48
  -2   1  15  277.84   38.72
  -2  -1  15  203.41   32.18
   2  -1 -14   -6.11   19.94
   2   1 -14    0.90   20.77
  -2  -1  14   30.10   18.22
  -2   1  14   -9.43   15.53
   2  -1 -13  338.77   38.28
   2   1 -13  304.57   38.35
  -2  -1  13  238.85   33.76
  -2   1  13  285.62   30.19
   2  -1 -12  158.00   24.69
   2   1 -12  142.93   25.32
  -2   1  12  171.26   27.09
  -2  -1  12  114.97   23.64
   2  -1 -11  352.10   29.51
   2   1 -11  356.68   32.52
  -2   1  11  375.79   34.16
  -2  -1  11  349.46   29.82
   2   1 -10  333.00   33.04
   2  -1 -10  365.69   28.39
  -2   1  10  374.08   30.77
  -2  -1  10  367.08   27.22
   2  -1  -9 1012.99   41.92
   2   1  -9  960.26   44.56
   2  -1  -9  987.63   14.66
  -2   1   9  958.20   42.91
  -2  -1   9 1007.03   40.05
   2  -1  -8 1004.31   14.84
   2  -1  -8 1017.32   38.61
   2   1  -8 1066.90   40.00
  -2   1   8 1063.82   38.34
  -2  -1   8 1097.39   38.90
   2  -1  -7  616.10   28.89
   2   1  -7  591.31   28.21
   2  -1  -7  625.92   11.75
  -2   1   7  587.54   25.86
  -2  -1   7  614.19   28.16
   2  -1  -6  232.92   15.41
   2  -1  -6  243.28    7.75
   2   1  -6  275.91   18.76
  -2   1   6  199.57   14.39
  -2  -1   6  254.96   14.67
   2  -1  -5  103.24    6.63
   2  -1  -5   98.27   10.89
   2   1  -5   98.05    3.57
   2   1  -5  100.34   12.58
  -2   1   5  116.42   10.35
  -2  -1   5  116.95    2.98
  -2  -1   5  112.85   11.86
   2  -1  -4   42.78    4.92
   2   1  -4   44.85    8.99
   2   1  -4   38.08    3.08
  -2   1   4   37.95    8.80
  -2  -1   4   32.98    8.23
  -2   1   4   27.31    7.93
  -2  -1   4   37.48    2.84
   2  -1  -3 1075.47   19.55
   2   1  -3 1051.84   24.84
   2   1  -3  982.27   16.83
  -2   1   3 1028.69   22.04
  -2   1   3 1045.40   24.91
  -2  -1   3 1086.48   16.72
  -2  -1   3 1047.87   24.25
   2  -1  -2 2368.84   34.01
  -2  -1   2 2333.67   36.88
  -2  -1   2 2316.24   32.72
  -2  -1   2 2327.79   30.77
  -2   1   2 2292.65   37.62
  -2   1   2 2349.41   30.10
   2  -1  -1 1639.18   28.29
   2  -1  -1 1667.39   17.48
  -2   1   1 1681.87   30.00
  -2   1   1 1691.70   17.24
  -2  -1   1 1693.08   27.34
  -2  -1   1 1688.04   22.16
  -2  -1   1 1698.39   28.17
   2  -1   0  202.24    3.86
   2  -1   0  194.15    3.43
   2   1   0  185.81    8.58
   2  -1   0  198.41    9.49
   2   1   0  176.35    5.48
  -2  -1   0  208.86    6.00
  -2  -1   0  191.66    8.80
  -2   1   0  210.51   10.59
   2   1   1   35.68    3.55
   2   1   1   58.79    7.80
   2  -1   1   50.78    6.66
   2  -1   1   41.32    3.37
  -2   1  -1   51.37    6.75
  -2   1  -1   46.03    3.24
  -2  -1  -1   42.07    3.79
  -2  -1  -1   47.12    5.79
   2  -1   2  164.88    9.97
   2  -1   2  162.76    7.23
   2   1   2  154.84   10.81
  -2  -1  -2  173.09    8.45
  -2   1  -2  160.78   12.53
  -2  -1  -2  178.46   10.77
   2  -1   3   88.62    8.22
   2   1   3   78.71   11.37
  -2  -1  -3   90.97    8.24
  -2  -1  -3   79.74    7.97
  -2   1  -3   63.28   11.21
   2  -1   4  737.68   22.77
   2   1   4  745.88   27.55
  -2   1  -4  710.62   22.15
  -2   1  -4  697.78   26.88
  -2  -1  -4  748.27   23.80
  -2  -1  -4  691.84   21.77
   2  -1   5  290.84   16.59
   2   1   5  317.64   21.07
  -2  -1  -5  294.64   17.96
  -2  -1  -5  320.75   16.32
  -2   1  -5  300.08   19.20
   2  -1   6  700.20   27.86
   2   1   6  672.15   32.66
  -2   1  -6  685.78   30.35
  -2  -1  -6  661.31   24.11
  -2  -1  -6  692.05   29.27
   2  -1   7   24.59   11.28
   2  -1   7   22.45    9.17
   2   1   7   28.79   12.31
  -2  -1  -7   24.94   12.68
  -2  -1  -7   28.58    9.01
  -2   1  -7    1.44   14.97
   2  -1   8  330.68   20.02
   2  -1   8  313.65   24.86
   2   1   8  307.38   29.77
  -2   1  -8  360.13   26.74
  -2  -1  -8  339.72   19.96
  -2  -1  -8  346.88   27.36
   2  -1   9   49.83   11.81
   2  -1   9   44.51   16.50
   2   1   9   22.00   16.07
  -2   1  -9   10.67   19.37
  -2  -1  -9   53.59   17.51
  -2  -1  -9   18.67   10.56
   2  -1  10   -3.00   15.34
   2  -1  10   31.55   10.89
   2   1  10   36.81   17.00
  -2   1 -10   43.43   21.39
  -2  -1 -10   87.95   20.89
  -2  -1 -10   44.11   12.09
   2  -1  11   -8.11   14.11
   2  -1  11   18.86   10.73
   2   1  11  -16.46   19.48
  -2   1 -11    5.75   19.60
  -2  -1 -11    7.76   10.30
  -2  -1 -11   46.01   15.28
   2  -1  12   31.15   19.90
   2   1  12   24.23   18.52
   2  -1  12   38.08   12.17
  -2   1 -12   40.66   18.92
  -2  -1 -12   -2.42   10.75
  -2  -1 -12   46.80   21.76
   2  -1  13  100.71   28.02
   2   1  13  112.66   31.93
  -2   1 -13  101.81   27.30
  -2  -1 -13  105.68   16.57
  -2  -1 -13   97.70   31.52
   2  -1  14   49.23   22.17
   2   1  14   -3.76   19.09
  -2  -1 -14    4.73   19.54
  -2   1 -14  -11.42   24.82
   2  -1  15  133.45   29.86
   2   1  15   78.04   36.07
  -2   1 -15  147.05   38.89
  -2  -1 -15  104.37   35.81
   2  -1  16   -8.59   21.04
   2   1  16    7.08   26.67
  -2   1 -16    5.47   26.82
  -2  -1 -16   19.74   26.11
   2  -1  17   52.82   35.65
   2   1  17   69.09   29.65
  -2   1 -17   -0.35   38.50
  -2  -1 -17   11.98   35.97
   2   2 -18  110.32   39.61
   2  -2 -18   37.81   31.29
  -2   2  18   83.73   40.26
  -2  -2  18   72.02   30.24
   2   2 -17  114.14   31.51
   2  -2 -17   38.17   33.48
  -2   2  17   58.70   28.51
  -2  -2  17   88.10   33.28
   2  -2 -16  101.94   29.64
   2   2 -16  104.67   29.46
  -2  -2  16   95.80   33.19
  -2   2  16   87.21   32.26
   2  -2 -15   15.05   24.95
   2   2 -15   48.41   26.06
  -2  -2  15   -1.57   22.95
  -2   2  15   12.64   18.97
   2  -2 -14   57.60   27.28
   2   2 -14   52.57   29.11
  -2   2  14   71.03   27.08
  -2  -2  14   77.22   26.22
   2  -2 -13   -0.56   14.78
   2   2 -13   12.49   15.18
  -2  -2  13   -0.21   14.20
   2   2 -12   53.35   21.35
   2  -2 -12   75.29   24.77
  -2   2  12   46.53   20.22
  -2  -2  12   66.53   19.02
   2  -2 -11   76.62   24.49
   2   2 -11  186.56   26.66
  -2  -2  11   76.07   19.68
  -2   2  11   96.71   24.23
   2  -2 -10  286.16   25.98
   2   2 -10  347.94   31.81
   2  -2 -10  330.60   11.47
  -2   2  10  340.31   28.67
  -2  -2  10  392.12   29.72
   2  -2  -9  160.15   22.04
   2   2  -9  186.47   25.35
   2  -2  -9  178.48    8.95
  -2   2   9  144.08   22.59
  -2  -2   9  194.35   21.99
   2  -2  -8  490.99   14.67
   2  -2  -8  469.46   26.07
   2   2  -8  517.82   28.53
  -2   2   8  532.86   27.75
  -2  -2   8  496.18   25.81
   2  -2  -7  125.07   16.35
   2   2  -7  142.96   15.47
   2  -2  -7  148.22    8.63
  -2  -2   7  140.77    5.13
  -2  -2   7  140.97   16.30
  -2   2   7  156.23   18.22
   2  -2  -6    9.01    9.37
   2  -2  -6   15.12    4.93
   2   2  -6   12.84    7.73
  -2  -2   6    9.34    7.04
  -2  -2   6    8.38    2.76
  -2   2   6   11.78    7.83
   2   2  -5   42.04    9.46
   2  -2  -5   21.96    6.76
  -2   2   5   16.30    9.00
  -2   2   5   21.75    8.33
  -2  -2   5   25.69    8.21
  -2  -2   5   16.42    3.06
   2  -2  -4   -2.13    4.67
   2   2  -4    4.84    4.44
  -2   2   4    1.97    4.18
  -2  -2   4   -0.06    2.35
  -2   2   4   -2.84    4.09
  -2  -2   4   -1.88    4.12
   2  -2  -3 5789.04   76.12
   2   2  -3 5839.17   72.63
  -2   2   3 5879.04   80.46
  -2   2   3 5812.80   70.25
  -2  -2   3 5883.20   65.96
  -2  -2   3 5717.48   79.71
   2  -2  -2  223.10   13.20
   2   2  -2  200.65    8.58
  -2   2   2  209.12   11.81
  -2  -2   2  195.34   10.33
  -2  -2   2  182.65   10.46
  -2   2   2  196.39    8.17
   2  -2  -1   12.55    2.32
   2   2  -1   16.09    3.01
   2  -2  -1   18.14    6.45
  -2  -2   1   23.26    6.59
  -2   2   1   22.28    2.49
  -2  -2   1   15.51    6.79
  -2   2   1   27.16    6.76
   2  -2   0  114.57   11.13
   2   2   0   98.19    2.72
   2   2   0  109.06   10.40
  -2  -2   0  120.96    8.47
  -2  -2   0   98.83    2.72
  -2   2   0  116.41    8.85
   2  -2   1  573.15    7.26
   2  -2   1  613.03   20.13
   2   2   1  556.27    8.53
   2   2   1  584.71   19.55
  -2  -2  -1  561.66    8.13
  -2   2  -1  561.29    7.84
  -2   2  -1  571.32   19.34
  -2  -2  -1  569.94   19.41
   2  -2   2  167.46    5.85
   2  -2   2  163.42   11.08
   2   2   2  144.76   11.92
  -2   2  -2  139.18   13.76
  -2  -2  -2  160.25    6.38
  -2  -2  -2  163.71   10.51
   2  -2   3  528.45   19.29
   2   2   3  492.65   23.21
   2  -2   3  536.40   13.74
  -2   2  -3  518.68   23.44
  -2  -2  -3  552.32   14.86
  -2  -2  -3  504.66   19.90
   2  -2   4  237.24   14.85
   2   2   4  251.87   20.18
   2  -2   4  246.25   11.56
  -2   2  -4  242.12   18.38
  -2  -2  -4  235.21   14.27
  -2  -2  -4  244.77   12.26
   2  -2   5 1492.35   35.85
   2   2   5 1548.64   46.93
   2  -2   5 1512.56   38.60
  -2   2  -5 1548.51   46.87
  -2  -2  -5 1563.64   38.03
  -2  -2  -5 1523.77   39.88
   2  -2   6   -8.19    6.87
   2   2   6   14.15    9.36
   2  -2   6    3.37    6.00
  -2  -2  -6   -2.63    7.13
  -2  -2  -6    3.41    7.67
  -2   2  -6   10.67    9.22
   2  -2   7  789.38   31.42
   2   2   7  859.97   39.73
   2  -2   7  868.70   30.81
  -2   2  -7  829.33   38.68
  -2  -2  -7  832.91   29.65
  -2  -2  -7  835.15   34.05
   2  -2   8   33.23   13.32
   2   2   8   30.58   15.09
   2  -2   8   35.53   11.32
  -2   2  -8   24.23   15.81
  -2  -2  -8   52.89   14.51
  -2  -2  -8   32.11   11.39
   2  -2   9  241.11   24.05
   2  -2   9  205.18   18.36
   2   2   9  221.16   32.80
  -2  -2  -9  250.65   19.86
  -2  -2  -9  261.30   22.93
  -2   2  -9  281.96   30.56
   2  -2  10   -4.45   10.32
   2   2  10   23.15   17.02
   2  -2  10  -10.91   14.62
  -2  -2 -10   32.60   11.31
  -2  -2 -10   19.50   15.74
   2  -2  11   61.95   14.83
   2   2  11   67.86   21.50
   2  -2  11   83.38   20.34
  -2   2 -11   54.80   26.65
  -2  -2 -11   63.50   13.16
  -2  -2 -11   45.28   21.12
   2  -2  12   -4.29   10.69
   2   2  12   32.06   16.71
   2  -2  12   -8.32   17.53
  -2  -2 -12    6.37   14.39
  -2  -2 -12    7.92    9.94
  -2   2 -12   28.45   21.57
   2   2  13  166.74   37.68
   2  -2  13  209.11   34.10
  -2   2 -13  228.94   32.65
  -2  -2 -13  185.26   19.69
  -2  -2 -13  244.14   34.30
   2  -2  14   35.77   25.92
   2   2  14   14.92   23.78
  -2  -2 -14   59.50   26.84
   2  -2  15   35.16   23.62
   2   2  15   31.94   30.86
  -2   2 -15   96.30   35.06
  -2  -2 -15   39.06   29.71
   2  -2  16   98.60   31.55
   2   2  16    9.29   28.00
  -2   2 -16   51.31   35.33
  -2  -2 -16    6.02   32.43
   2  -3 -18   79.99   36.85
   2   3 -18   40.00   37.07
  -2   3  18   10.49   28.47
  -2  -3  18   50.85   34.12
   2  -3 -17  -29.47   26.92
   2   3 -17   21.11   27.07
  -2   3  17   -5.99   20.22
  -2  -3  17   -4.21   23.94
   2  -3 -16   73.72   24.30
   2   3 -16   -4.67   24.41
  -2   3  16    4.95   28.70
   2  -3 -15    3.25   22.29
   2   3 -15   18.83   23.26
  -2   3  15    7.27   22.82
  -2  -3  15   -4.84   21.51
   2  -3 -14   -2.01   21.57
   2   3 -14   25.72   19.16
  -2   3  14    7.01   22.01
   2  -3 -13    4.88   18.37
   2   3 -13   28.63   21.13
  -2   3  13    2.78   15.98
  -2  -3  13   -1.38   17.92
   2   3 -12   85.34   22.35
   2  -3 -12   59.55   20.47
  -2   3  12   76.94   21.41
  -2  -3  12   69.51   22.78
   2  -3 -11   13.31    5.39
   2  -3 -11   -4.29   17.52
   2   3 -11   40.81   16.16
  -2   3  11   -3.45   15.33
  -2  -3  11   -0.01   16.39
   2  -3 -10  313.23   26.19
   2  -3 -10  282.32   13.93
   2   3 -10  315.63   32.59
  -2  -3  10  319.43   27.80
  -2   3  10  296.89   27.42
   2  -3  -9   19.79   13.35
   2  -3  -9    4.66    5.72
   2   3  -9  -16.53   15.09
  -2  -3   9   12.67   10.98
  -2  -3   9    9.55    4.00
  -2   3   9   14.94   12.11
   2   3  -8  186.82   19.02
   2  -3  -8  158.10   12.79
   2  -3  -8  178.65   20.07
  -2  -3   8  158.83    9.09
  -2  -3   8  154.61   16.66
  -2   3   8  138.65   18.99
   2  -3  -7   -5.19   10.32
   2  -3  -7    5.14    6.86
   2   3  -7    8.75    9.22
  -2   3   7    0.70   11.23
  -2  -3   7    4.35    4.38
  -2  -3   7    9.72    7.84
   2  -3  -6  340.31   18.53
   2   3  -6  325.84   21.66
  -2  -3   6  354.83   18.86
  -2   3   6  336.68   20.07
  -2   3   6  362.85   23.89
  -2  -3   6  334.80   13.62
   2  -3  -5   -0.43    7.81
   2   3  -5   12.46    7.11
  -2   3   5   29.73    8.33
  -2   3   5    1.08    7.14
  -2  -3   5   -3.09    4.63
  -2  -3   5   -5.29    6.25
   2  -3  -4 1161.95   34.61
   2   3  -4 1164.23   31.62
  -2   3   4 1114.67   30.69
  -2   3   4 1148.68   31.77
  -2  -3   4 1176.47   28.16
  -2  -3   4 1184.60   32.39
   2  -3  -3  254.30   17.53
   2   3  -3  235.51   12.12
  -2   3   3  232.80   12.81
  -2  -3   3  229.41   14.60
  -2  -3   3  231.75   12.63
  -2   3   3  235.67   14.07
   2   3  -2  118.93    6.81
   2  -3  -2  133.19   12.43
  -2   3   2  110.40    9.60
  -2   3   2  125.58    8.14
  -2  -3   2  125.56   10.11
  -2  -3   2  102.12    9.29
   2  -3  -1   21.97    8.57
   2   3  -1   25.73    3.05
   2   3  -1   34.06    8.76
  -2   3   1   15.07    3.33
  -2  -3   1   21.71    6.43
  -2   3   1   24.16    6.18
   2  -3   0  487.40   20.35
   2   3   0  473.84   19.52
  -2   3   0  484.41    9.38
  -2  -3   0  490.31   19.01
  -2   3   0  462.57   19.38
   2  -3   1  130.86   12.40
   2   3   1  139.38   14.41
   2  -3   1  151.26    4.80
  -2  -3  -1  163.43   13.46
  -2   3  -1  141.91   11.48
   2  -3   2  116.35    5.42
   2  -3   2   99.68   11.32
   2   3   2  152.93   15.08
  -2  -3  -2  116.26    3.93
  -2  -3  -2  134.49   11.01
  -2   3  -2  142.31   12.01
   2  -3   3  225.64    8.55
   2  -3   3  242.01   16.41
   2   3   3  240.11   16.80
  -2   3  -3  224.23   18.03
  -2  -3  -3  230.18    7.88
  -2  -3  -3  214.43   13.60
   2  -3   4 1541.00   31.20
   2  -3   4 1574.12   40.87
   2   3   4 1482.89   48.17
  -2   3  -4 1502.64   48.35
  -2  -3  -4 1521.38   41.60
  -2  -3  -4 1519.20   29.71
   2  -3   5  288.23   18.99
   2  -3   5  286.46   14.51
   2   3   5  282.86   22.21
  -2   3  -5  283.91   21.19
  -2  -3  -5  290.15   13.81
  -2  -3  -5  279.87   18.29
   2  -3   6  986.39   30.88
   2  -3   6  989.86   34.75
   2   3   6  995.56   44.51
  -2   3  -6  973.47   43.65
  -2  -3  -6  936.39   31.13
  -2  -3  -6  997.15   35.27
   2  -3   7   18.80   11.74
   2  -3   7   21.25   10.85
   2   3   7   19.93   15.77
  -2   3  -7   11.74   14.04
  -2  -3  -7   50.21   10.27
  -2  -3  -7   23.00   11.06
   2  -3   8  607.80   29.03
   2  -3   8  589.83   29.46
   2   3   8  597.94   41.84
  -2   3  -8  599.06   41.57
  -2  -3  -8  573.22   30.01
  -2  -3  -8  594.03   29.22
   2   3   9    0.07   17.25
   2  -3   9   31.61   11.84
  -2  -3  -9   55.44   15.30
  -2  -3  -9    4.84   12.31
  -2   3  -9    8.82   20.38
   2  -3  10  414.48   25.02
   2   3  10  522.28   38.62
   2  -3  10  477.99   32.71
  -2   3 -10  447.64   41.42
  -2  -3 -10  461.13   28.59
  -2  -3 -10  463.88   33.79
   2  -3  11    8.41   17.69
   2   3  11   61.48   22.27
   2  -3  11   47.86   13.82
  -2   3 -11   10.85   20.56
  -2  -3 -11   40.51   15.11
  -2  -3 -11   57.26   14.29
   2  -3  12   41.54   21.81
   2  -3  12   79.38   16.01
   2   3  12   90.21   25.37
  -2   3 -12   75.81   29.22
  -2  -3 -12   89.36   23.52
  -2  -3 -12   37.62   17.15
   2  -3  13   12.44   20.49
   2   3  13   19.41   22.11
  -2   3 -13   59.53   26.30
  -2  -3 -13   23.09   21.29
  -2  -3 -13    7.94   12.71
   2  -3  14  113.27   29.55
   2   3  14  112.58   38.22
  -2   3 -14  108.54   31.52
  -2  -3 -14  128.94   33.02
   2  -3  15   16.94   23.49
   2   3  15   21.14   29.32
  -2   3 -15    0.94   30.38
  -2  -3 -15    8.45   25.75
   2  -3  16   24.54   34.26
   2   3  16  119.74   33.80
  -2  -3 -16  104.86   36.88
  -2   3 -16   74.25   41.77
   2  -4 -18   12.15   24.52
   2   4 -18   -6.71   26.81
  -2   4  18    8.41   30.40
  -2  -4  18   16.71   27.86
   2  -4 -17   27.81   24.69
   2   4 -17   -1.14   26.56
  -2   4  17   20.22   26.42
  -2  -4  17  -18.67   18.64
   2  -4 -16   -4.14   26.02
  -2   4  16   24.59   27.15
  -2  -4  16   11.87   23.96
   2  -4 -15    3.61   21.24
   2   4 -15   -1.09   18.99
  -2   4  15    1.87   21.26
  -2  -4  15    4.70   19.39
   2  -4 -14   24.46   22.01
   2   4 -14   -8.08   22.80
  -2   4  14   -7.23   21.18
  -2  -4  14   12.40   19.48
   2  -4 -13   11.20   15.80
   2   4 -13   20.74   21.79
  -2   4  13    4.22   21.45
  -2  -4  13    5.60   15.32
   2  -4 -12   51.29   23.32
   2  -4 -12   45.30    8.92
   2   4 -12   53.58   25.35
  -2  -4  12   43.43   22.13
  -2   4  12   71.03   25.45
   2  -4 -11    0.71    7.06
   2   4 -11   -5.89   19.16
   2  -4 -11   -8.19   15.98
  -2   4  11   36.92   15.19
  -2  -4  11   20.81   15.75
   2  -4 -10  278.45   18.53
   2   4 -10  298.34   32.65
   2  -4 -10  259.22   24.97
  -2   4  10  248.93   28.62
  -2  -4  10  289.54   25.23
  -2  -4  10  278.79   14.35
   2  -4  -9  215.38   23.54
   2  -4  -9  234.70   16.48
   2   4  -9  248.41   24.77
  -2   4   9  246.69   28.88
  -2  -4   9  234.48   14.30
  -2  -4   9  227.34   21.63
   2  -4  -8  334.33   21.21
   2   4  -8  296.26   28.05
   2  -4  -8  292.08   25.17
  -2   4   8  340.71   26.73
  -2  -4   8  330.82   25.60
  -2  -4   8  307.32   15.68
   2  -4  -7  616.01   28.93
   2   4  -7  661.33   31.40
  -2   4   7  648.68   35.44
  -2  -4   7  663.01   23.37
  -2  -4   7  664.87   30.55
   2   4  -6  367.75   24.11
   2  -4  -6  393.29   24.03
  -2   4   6  400.23   22.62
  -2   4   6  454.13   23.20
  -2  -4   6  372.26   23.18
  -2  -4   6  398.86   18.30
   2  -4  -5  248.91   20.78
   2   4  -5  212.20   15.01
  -2   4   5  214.66   18.51
  -2   4   5  224.23   14.98
  -2  -4   5  207.20   15.42
  -2  -4   5  233.66   17.84
   2  -4  -4  229.99   21.04
   2   4  -4  259.55   15.05
  -2   4   4  211.48   15.75
  -2  -4   4  199.74   15.30
  -2  -4   4  226.57   15.30
  -2   4   4  203.53   14.98
   2  -4  -3 1613.65   49.78
   2   4  -3 1691.78   35.20
  -2   4   3 1619.03   37.82
  -2   4   3 1561.02   38.84
  -2  -4   3 1645.14   41.92
  -2  -4   3 1559.89   39.89
   2  -4  -2 1258.15   40.30
   2   4  -2 1315.31   25.76
  -2   4   2 1261.49   28.65
  -2   4   2 1256.99   34.07
  -2  -4   2 1247.12   36.93
  -2  -4   2 1203.10   36.37
   2  -4  -1 2220.62   57.22
   2   4  -1 2316.46   29.24
   2   4  -1 2260.99   51.96
  -2   4   1 2238.40   35.90
  -2   4   1 2285.05   49.27
  -2  -4   1 2182.43   51.80
   2  -4   0  877.55   32.72
   2   4   0  951.26   10.63
   2   4   0  914.56   31.10
  -2   4   0  924.20   18.82
  -2   4   0  879.12   29.80
  -2  -4   0  969.85   31.33
   2  -4   1 1176.06   38.65
   2   4   1 1119.81   35.58
  -2   4  -1 1112.13   20.14
  -2   4  -1 1134.93   35.30
  -2  -4  -1 1138.76   35.23
   2  -4   2  693.46   15.85
   2   4   2  697.21   29.25
   2  -4   2  705.46   28.33
  -2  -4  -2  695.43   27.79
   2  -4   3 1786.96   31.35
   2  -4   3 1755.38   49.92
   2   4   3 1736.74   54.31
  -2   4  -3 1776.81   49.89
  -2  -4  -3 1791.84   24.59
  -2  -4  -3 1792.71   49.64
   2  -4   4   41.60    5.78
   2  -4   4   50.33   13.45
   2   4   4   47.85   13.30
  -2   4  -4   50.15   13.91
  -2  -4  -4   27.22    5.18
  -2  -4  -4   47.82   10.23
   2  -4   5  409.57   25.39
   2  -4   5  380.36   15.90
   2   4   5  368.15   30.96
  -2   4  -5  410.27   26.20
  -2  -4  -5  412.68   15.26
  -2  -4  -5  389.88   23.85
   2  -4   6  112.00   16.86
   2  -4   6  103.72   11.40
   2   4   6  122.78   23.25
  -2   4  -6  101.56   21.83
  -2  -4  -6   80.68    9.89
  -2  -4  -6   78.73   15.26
   2  -4   7  377.75   25.59
   2  -4   7  363.13   20.85
   2   4   7  363.00   34.98
  -2   4  -7  350.72   32.67
  -2  -4  -7  358.03   19.74
  -2  -4  -7  308.64   23.61
   2  -4   8   -8.11   12.21
   2   4   8   21.97   15.14
   2  -4   8   -7.72    9.04
  -2   4  -8   25.06   14.51
  -2  -4  -8   34.54   11.52
  -2  -4  -8   -2.85   10.16
   2  -4   9  537.97   30.85
   2  -4   9  529.37   30.50
   2   4   9  437.30   43.84
  -2  -4  -9  523.29   29.79
  -2  -4  -9  543.17   31.03
  -2   4  -9  540.61   39.68
   2  -4  10   58.48   16.48
   2  -4  10   41.33   17.32
   2   4  10   77.40   27.90
  -2   4 -10  123.57   27.07
  -2  -4 -10   52.22   16.18
  -2  -4 -10   91.08   16.68
   2  -4  11  232.39   27.71
   2  -4  11  312.12   25.77
   2   4  11  307.50   40.64
  -2   4 -11  262.13   35.14
  -2  -4 -11  313.09   24.96
  -2  -4 -11  307.45   28.91
   2  -4  12  199.93   29.68
   2  -4  12  233.01   22.77
   2   4  12  173.47   34.95
  -2   4 -12  199.14   33.24
  -2  -4 -12  260.40   29.92
  -2  -4 -12  232.18   25.13
   2  -4  13  100.32   26.05
   2   4  13  135.01   31.04
  -2   4 -13  138.98   30.87
  -2  -4 -13   98.19   21.30
  -2  -4 -13   93.47   26.99
   2  -4  14   -6.76   21.38
   2   4  14  -21.31   23.54
  -2  -4 -14   -4.25   21.75
  -2   4 -14  -29.48   28.58
   2  -4  15   69.27   29.26
   2   4  15   79.34   39.35
  -2   4 -15   71.32   32.91
  -2  -4 -15   56.21   30.67
   2  -4  16   -2.56   21.48
   2   4  16   30.71   22.87
  -2   4 -16  -30.53   25.48
   2   5 -17   76.87   39.52
   2  -5 -17   66.50   28.60
  -2   5  17   21.82   30.14
  -2  -5  17   41.46   32.69
   2  -5 -16  -13.70   24.13
   2   5 -16   -1.22   30.36
  -2   5  16   56.38   26.20
  -2  -5  16   24.62   25.39
   2  -5 -15   31.30   25.15
   2   5 -15   76.70   35.69
  -2   5  15   91.50   28.50
  -2  -5  15   97.93   29.79
   2  -5 -14   15.33   24.20
   2   5 -14   20.07   27.48
  -2   5  14   27.64   28.81
  -2  -5  14   41.10   19.13
   2  -5 -13  148.46   25.19
   2   5 -13  183.76   35.40
  -2   5  13  203.70   37.16
  -2  -5  13  102.87   28.51
   2  -5 -12   64.10   23.14
   2  -5 -12   70.78   13.94
   2   5 -12   47.56   22.25
  -2   5  12   75.96   24.21
  -2  -5  12   83.43   23.02
   2  -5 -11  124.67   16.93
   2  -5 -11  126.54   20.99
   2   5 -11   86.43   23.64
  -2   5  11  110.93   24.14
  -2  -5  11  109.20   19.96
   2  -5 -10   12.18   16.38
   2  -5 -10    8.65   11.82
   2   5 -10   27.24   20.11
  -2   5  10   27.33   21.25
  -2  -5  10   21.39    8.81
  -2  -5  10   45.85   18.15
   2  -5  -9  819.10   37.03
   2  -5  -9  839.72   42.29
   2   5  -9  797.85   46.27
  -2   5   9  837.23   49.10
  -2  -5   9  841.60   38.88
  -2  -5   9  754.97   30.51
   2  -5  -8  129.25   19.65
   2  -5  -8  141.90   20.44
   2   5  -8  103.89   23.76
  -2   5   8  115.26   20.92
  -2  -5   8  120.08   17.45
  -2  -5   8  164.28   16.25
   2  -5  -7  666.64   35.08
   2   5  -7  569.13   31.39
  -2   5   7  641.36   29.19
  -2   5   7  596.19   37.64
  -2  -5   7  691.66   29.43
  -2  -5   7  677.57   34.20
   2  -5  -6    8.87   11.35
   2   5  -6   12.62   11.92
  -2   5   6    0.85   10.37
  -2   5   6    7.63   13.36
  -2  -5   6    5.16   11.93
  -2  -5   6   19.51    9.85
   2  -5  -5  192.81   23.02
   2   5  -5  171.01   14.84
  -2   5   5  125.60   19.64
  -2   5   5  179.22   15.78
  -2  -5   5  181.24   17.81
  -2  -5   5  152.86   14.83
   2  -5  -4  299.53   26.90
   2   5  -4  331.36   18.44
  -2   5   4  323.13   20.72
  -2   5   4  319.61   19.36
  -2  -5   4  320.34   22.13
  -2  -5   4  304.29   19.08
   2  -5  -3   93.98   20.38
   2   5  -3   79.81    9.16
  -2   5   3   95.24   12.52
  -2   5   3  101.79   11.95
  -2  -5   3   80.00   12.32
  -2  -5   3   60.81   14.62
   2  -5  -2  406.87   32.28
   2   5  -2  439.00   25.02
   2   5  -2  461.52   14.83
  -2   5   2  445.90   19.43
  -2   5   2  425.82   21.45
  -2  -5   2  488.07   23.64
   2  -5  -1  676.92   36.20
   2   5  -1  672.64   15.03
   2   5  -1  654.24   29.61
  -2   5   1  697.60   20.88
  -2   5   1  666.72   26.67
  -2  -5   1  679.65   31.69
   2  -5   0   -2.35    9.50
   2   5   0    6.47    1.95
   2   5   0   -2.60    8.16
  -2   5   0    5.75    4.34
  -2   5   0   23.85    8.72
  -2  -5   0    1.65   10.13
   2  -5   1  765.94   34.56
   2   5   1  776.72   34.86
  -2   5  -1  752.34   19.38
  -2   5  -1  797.30   29.35
  -2  -5  -1  738.52   33.51
   2  -5   2   87.97   18.01
   2   5   2   35.84   13.23
  -2   5  -2   69.57   11.38
  -2  -5  -2   30.33   14.00
   2  -5   3  121.22    8.03
   2  -5   3  112.53   20.64
   2   5   3  108.28   16.39
  -2   5  -3  132.32   17.21
  -2  -5  -3  117.64   14.77
  -2  -5  -3  112.92    4.90
   2  -5   4   25.96    6.10
   2  -5   4   37.28   14.74
   2   5   4   31.36   13.77
  -2   5  -4   48.89   12.67
  -2  -5  -4   17.07    4.49
  -2  -5  -4    5.31   13.21
   2  -5   5   10.41   14.63
   2  -5   5    8.36    5.99
   2   5   5   24.49   14.09
  -2   5  -5   37.27   15.75
  -2  -5  -5   16.04    5.67
  -2  -5  -5   18.26   10.28
   2  -5   6   51.79    9.09
   2  -5   6   59.48   17.93
   2   5   6   66.84   19.95
  -2   5  -6   66.81   17.47
  -2  -5  -6   68.46   16.22
  -2  -5  -6   50.06    8.15
   2  -5   7   46.54   17.07
   2  -5   7   20.60    8.57
   2   5   7   23.93   21.96
  -2   5  -7    3.66   16.58
  -2  -5  -7   30.11   11.89
  -2  -5  -7   33.12    9.64
   2  -5   8   20.19   11.37
   2  -5   8   29.93   17.26
   2   5   8   19.85   19.03
  -2   5  -8   49.88   20.55
  -2  -5  -8   26.35    9.85
  -2  -5  -8   30.20   12.15
   2  -5   9   50.87   14.78
   2  -5   9   68.30   17.77
   2   5   9   61.23   22.81
  -2   5  -9   28.60   20.15
  -2  -5  -9   15.82   12.58
  -2  -5  -9   51.34   16.47
   2  -5  10   70.12   18.07
   2  -5  10  105.67   20.21
   2   5  10  111.16   33.32
  -2   5 -10   56.37   28.90
  -2  -5 -10   93.33   20.16
  -2  -5 -10  111.42   18.22
   2  -5  11   65.13   20.76
   2  -5  11  118.77   20.99
   2   5  11  144.35   29.85
  -2   5 -11   87.44   25.96
  -2  -5 -11  128.81   21.48
  -2  -5 -11   94.04   21.56
   2  -5  12  128.92   25.36
   2  -5  12  135.99   21.96
   2   5  12  171.52   41.60
  -2   5 -12  189.81   31.87
  -2  -5 -12  161.94   25.40
  -2  -5 -12  157.42   24.13
   2  -5  13  188.32   29.48
   2   5  13  119.36   41.63
  -2   5 -13  117.07   33.26
  -2  -5 -13  141.34   28.07
  -2  -5 -13  157.88   25.65
   2  -5  14   38.80   25.36
   2   5  14   85.10   37.77
  -2   5 -14   76.12   29.53
   2  -5  15   73.71   26.22
   2   5  15   -7.12   32.05
  -2   5 -15   17.08   34.43
   2  -6 -17   29.02   29.43
   2   6 -17   -8.23   28.13
  -2   6  17   37.63   26.21
  -2  -6  17  -12.90   27.38
   2  -6 -16  208.61   36.53
   2   6 -16  215.87   41.81
  -2   6  16  173.88   40.89
  -2  -6  16  255.43   41.78
   2  -6 -15   67.31   30.14
   2   6 -15   74.74   28.69
  -2   6  15   23.14   37.12
  -2  -6  15   53.49   24.00
   2  -6 -14  317.14   43.09
   2   6 -14  399.01   50.76
  -2  -6  14  415.59   42.51
  -2   6  14  350.09   50.96
   2  -6 -13   -9.67   18.32
   2  -6 -13   -5.59   10.65
   2   6 -13   34.03   22.23
  -2   6  13   10.03   18.66
  -2  -6  13   11.11   17.12
   2  -6 -12  159.79   21.76
   2  -6 -12  207.85   28.93
   2   6 -12  124.50   28.75
  -2   6  12  237.41   37.67
  -2  -6  12  168.65   28.16
   2  -6 -11   43.23   15.08
   2  -6 -11   17.46   15.71
   2   6 -11   39.90   19.62
  -2   6  11    4.42   19.72
  -2  -6  11   47.62   11.53
  -2  -6  11   18.32   15.13
   2  -6 -10   50.92   17.31
   2  -6 -10   60.34   19.54
   2   6 -10   38.92   19.83
  -2   6  10   50.50   25.33
  -2  -6  10   47.23   12.65
  -2  -6  10   48.13   16.42
   2  -6  -9   57.55   19.41
   2  -6  -9   68.63   19.05
   2   6  -9   46.54   20.36
  -2  -6   9  106.71   20.44
  -2   6   9   77.77   25.19
  -2  -6   9   87.05   16.18
   2  -6  -8  614.88   32.68
   2  -6  -8  616.29   36.16
   2   6  -8  613.64   40.46
  -2   6   8  654.07   43.54
  -2  -6   8  615.84   32.90
  -2  -6   8  593.27   36.32
   2  -6  -7   15.92   14.75
   2   6  -7   50.71   16.87
  -2   6   7   36.83   13.90
  -2  -6   7   25.57   12.57
  -2   6   7   27.74   18.89
  -2  -6   7   21.20   13.74
   2  -6  -6 1013.15   50.22
   2   6  -6  962.13   41.33
  -2   6   6  957.12   38.90
  -2   6   6  983.98   45.15
  -2  -6   6  981.62   42.53
  -2  -6   6  946.74   41.38
   2  -6  -5  160.90   27.06
   2   6  -5  189.39   19.25
  -2   6   5  226.24   23.04
  -2   6   5  186.63   18.91
  -2  -6   5  206.30   22.14
  -2  -6   5  194.92   20.79
   2  -6  -4  413.25   34.39
   2   6  -4  402.34   22.29
  -2   6   4  428.80   26.25
  -2   6   4  436.09   23.47
  -2  -6   4  401.66   24.39
  -2  -6   4  371.92   25.11
   2  -6  -3    2.38   17.40
   2   6  -3   15.65    6.85
  -2   6   3   16.45    8.87
  -2   6   3    7.82   10.17
  -2  -6   3    8.22    9.26
  -2  -6   3    2.24   11.30
   2  -6  -2   10.37   18.25
   2   6  -2   13.83   10.35
   2   6  -2   19.11    5.61
  -2   6   2    4.74    8.94
  -2  -6   2   10.85   12.30
  -2   6   2   30.17    9.90
   2  -6  -1  272.52   26.61
   2   6  -1  318.92   21.48
   2   6  -1  277.37   11.21
  -2   6   1  253.65   16.13
  -2   6   1  272.54   20.03
  -2  -6   1  271.46   22.17
   2  -6   0   12.39   14.03
   2   6   0   19.76    3.54
   2   6   0   32.17   11.70
  -2   6   0   20.02    6.81
  -2   6   0   44.30   11.69
  -2  -6   0   26.79   14.16
   2  -6   1   41.31   20.80
   2   6   1   44.22   15.61
  -2   6  -1   46.53    7.31
  -2  -6  -1   64.30   16.50
  -2   6  -1   43.31   13.58
   2   6   2   73.67   15.85
   2  -6   2   51.51   20.84
  -2   6  -2   49.42    8.64
  -2   6  -2   58.06   16.36
  -2  -6  -2   77.26   14.92
   2  -6   3   22.59   18.27
   2  -6   3   14.91    6.11
   2   6   3   14.18   15.96
  -2   6  -3    6.03   12.00
  -2  -6  -3   31.91   12.17
   2  -6   4   41.30    7.41
   2  -6   4   45.23   16.27
   2   6   4   36.30   15.62
  -2  -6  -4   28.48    4.10
  -2  -6  -4   36.35   16.91
  -2   6  -4   32.45   13.63
   2  -6   5   17.92    8.18
   2  -6   5   33.59   15.84
   2   6   5   52.12   21.10
  -2   6  -5   19.36   17.13
  -2  -6  -5   23.98   17.28
  -2  -6  -5   18.64    5.29
   2  -6   6   -4.16   19.42
   2  -6   6   25.52    9.26
   2   6   6   15.15   18.37
  -2   6  -6   27.97   19.94
  -2  -6  -6   21.49    7.37
  -2  -6  -6   41.21   13.64
   2  -6   7   44.24   11.32
   2  -6   7   15.70   18.78
   2   6   7   23.42   24.00
  -2   6  -7   66.61   21.79
  -2  -6  -7   15.61    7.41
  -2  -6  -7   43.49   16.94
   2  -6   8   -7.68    9.19
   2  -6   8   13.63   15.40
   2   6   8  -14.39   16.39
  -2   6  -8    3.14   14.99
  -2  -6  -8   -1.66    7.04
  -2  -6  -8   32.69   10.98
   2  -6   9    9.63   14.79
   2  -6   9   13.54   10.80
   2   6   9   -2.58   18.56
  -2   6  -9  -16.58   19.88
  -2  -6  -9    1.27    8.48
  -2  -6  -9   16.16   13.99
   2  -6  10    6.57   18.01
   2  -6  10    5.90   14.91
   2   6  10    4.30   27.68
  -2   6 -10   31.68   26.06
  -2  -6 -10   38.07   17.98
  -2  -6 -10   43.24   11.96
   2  -6  11   66.12   17.52
   2  -6  11   56.64   20.81
   2   6  11   39.99   25.42
  -2  -6 -11    7.86   18.26
  -2  -6 -11   19.57   15.62
  -2   6 -11   20.99   24.62
   2  -6  12   84.06   20.94
   2  -6  12   73.75   22.28
   2   6  12   82.05   30.15
  -2   6 -12   59.56   31.71
  -2  -6 -12   62.30   21.69
   2  -6  13    0.14   15.65
   2   6  13   -5.32   21.90
  -2   6 -13    8.41   24.80
  -2  -6 -13   -6.30   16.11
   2  -6  14  218.57   32.31
   2   6  14  146.15   41.59
  -2   6 -14  178.87   46.08
   2   6  15   52.81   32.63
  -2   6 -15   18.85   31.13
   2   7 -16   18.89   30.47
  -2   7  16  -20.52   26.88
  -2  -7  16   24.99   26.64
   2  -7 -15  215.89   41.31
   2   7 -15  188.97   48.35
  -2   7  15  223.58   51.57
  -2  -7  15  274.51   42.68
   2  -7 -14  -10.35   19.85
   2   7 -14    6.94   20.02
  -2  -7  14   11.12   16.77
  -2   7  14   -2.96   26.08
   2  -7 -13  223.83   25.33
   2   7 -13  251.31   36.24
   2  -7 -13  206.72   34.70
  -2   7  13  241.29   37.56
  -2  -7  13  250.31   31.66
   2  -7 -12   16.16   17.31
   2   7 -12   17.77   26.03
   2  -7 -12   24.68   20.09
  -2   7  12   24.64   27.77
  -2  -7  12   21.93   21.39
   2  -7 -11   78.67   22.58
   2  -7 -11   72.12   20.71
   2   7 -11   88.18   28.27
  -2   7  11   79.58   25.82
  -2  -7  11   76.48   20.29
  -2  -7  11   35.76   15.28
   2  -7 -10   12.61   14.25
   2  -7 -10    0.14   14.39
   2   7 -10   12.24   14.84
  -2   7  10   -5.92   16.82
  -2  -7  10    2.13   13.20
  -2  -7  10    8.97   11.79
   2  -7  -9   40.51   19.90
   2  -7  -9   58.39   17.71
   2   7  -9  -16.15   20.32
  -2   7   9   49.75   23.32
  -2  -7   9   39.39   16.39
   2  -7  -8  107.83   21.70
   2   7  -8   91.60   23.62
  -2   7   8  109.78   16.84
  -2   7   8  145.97   29.16
  -2  -7   8  122.63   20.63
  -2  -7   8  157.74   22.77
   2  -7  -7  524.56   40.00
   2   7  -7  471.39   34.31
  -2   7   7  481.05   30.40
  -2   7   7  440.74   38.11
  -2  -7   7  427.16   33.46
  -2  -7   7  427.48   33.67
   2  -7  -6   31.22   19.17
   2   7  -6   22.59   13.94
  -2   7   6   10.39   11.41
  -2   7   6    1.99   16.34
  -2  -7   6   -1.61   13.74
  -2  -7   6  -13.04   15.41
   2  -7  -5  436.00   41.44
   2   7  -5  409.46   25.78
  -2   7   5  373.60   27.57
  -2   7   5  364.96   25.56
  -2  -7   5  375.72   28.21
  -2  -7   5  413.95   26.90
   2   7  -4  399.54   23.51
   2  -7  -4  374.11   34.80
  -2   7   4  391.99   28.81
  -2  -7   4  362.20   31.82
  -2   7   4  391.29   24.02
  -2  -7   4  385.36   30.35
   2  -7  -3  324.47   37.68
   2   7  -3  337.08   25.13
   2   7  -3  309.07   18.35
  -2   7   3  287.39   20.96
  -2   7   3  294.28   23.17
  -2  -7   3  318.29   30.38
   2  -7  -2  489.46   39.57
   2   7  -2  510.72   30.69
   2   7  -2  549.07   19.63
  -2   7   2  531.68   26.88
  -2   7   2  573.95   28.37
  -2  -7   2  595.52   39.75
   2  -7  -1   55.21   26.86
   2   7  -1   64.40    6.55
   2   7  -1   43.19   15.90
  -2   7   1   71.06   11.08
  -2  -7   1   51.68   20.78
  -2   7   1   74.71   15.23
   2  -7   0  247.91   36.46
   2   7   0  344.27   26.57
   2   7   0  287.73   10.84
  -2   7   0  301.66   23.24
  -2   7   0  309.90   18.45
  -2  -7   0  301.53   31.02
   2   7   1   22.43   14.04
   2   7   1   21.97    3.53
   2  -7   1   36.55   23.00
  -2   7  -1   26.65   14.17
  -2   7  -1   36.54    9.72
  -2  -7  -1   17.15   14.23
   2  -7   2  132.17   29.23
   2   7   2  128.70   21.47
  -2   7  -2  127.80   13.09
  -2   7  -2  112.51   20.08
  -2  -7  -2  138.42   24.92
   2  -7   3    8.17   17.62
   2   7   3   36.53   19.52
  -2   7  -3   21.76    8.94
  -2   7  -3   21.45   16.85
  -2  -7  -3   41.80   18.26
   2  -7   4   64.00   27.29
   2  -7   4   99.48   12.73
   2   7   4  124.51   27.02
  -2   7  -4  115.36   22.52
  -2  -7  -4   85.36   19.62
   2  -7   5    8.69    9.01
   2  -7   5   -6.47   19.56
   2   7   5   11.55   20.91
  -2   7  -5   38.22   14.68
  -2  -7  -5   12.83   17.58
   2  -7   6  110.90   13.22
   2  -7   6  109.64   23.80
   2   7   6   80.07   25.45
  -2   7  -6   60.32   26.68
  -2  -7  -6  127.15   25.01
   2  -7   7   29.98   11.27
   2  -7   7   53.22   24.34
   2   7   7  124.00   27.78
  -2   7  -7   62.54   20.53
  -2  -7  -7   68.69   21.31
   2  -7   8   57.63   24.11
   2  -7   8   53.25   13.38
   2   7   8   68.69   28.52
  -2   7  -8   84.62   27.90
  -2  -7  -8   47.16   17.27
   2  -7   9    0.13   19.01
   2  -7   9   29.59   11.45
   2   7   9    0.28   21.25
  -2   7  -9   22.80   19.24
  -2  -7  -9   -4.18   17.04
   2  -7  10   48.21   17.25
   2  -7  10   41.49   24.65
   2   7  10   65.91   26.52
  -2   7 -10   58.81   24.64
  -2  -7 -10   46.64   18.55
   2  -7  11   15.22   18.14
   2  -7  11   48.07   23.02
   2   7  11   79.18   28.17
  -2   7 -11   35.42   25.66
  -2  -7 -11   85.51   22.16
   2  -7  12   50.84   20.99
   2   7  12  117.40   38.17
  -2   7 -12   16.56   33.67
  -2  -7 -12   54.93   22.80
   2   7  13   77.11   40.94
  -2   7 -13  103.68   39.67
  -2  -7 -13   65.84   26.30
   2   7  14   51.91   44.10
  -2   7 -14   81.19   40.96
   2   8 -15  102.18   39.28
  -2   8  15    8.77   33.45
  -2  -8  15  113.02   35.18
   2  -8 -14  108.24   34.21
   2   8 -14  153.60   35.40
  -2   8  14  247.31   47.16
  -2  -8  14  161.73   36.53
   2  -8 -13    8.06   24.12
   2  -8 -13   82.43   21.69
   2   8 -13   -9.00   24.60
  -2   8  13   76.84   34.21
  -2  -8  13   15.33   24.83
   2  -8 -12   77.81   25.50
   2  -8 -12   51.40   24.36
   2   8 -12   92.08   26.31
  -2   8  12   78.89   31.80
  -2  -8  12  102.01   24.86
   2  -8 -11   40.76   22.36
   2  -8 -11   63.16   23.53
   2   8 -11   82.01   29.82
  -2  -8  11  106.47   25.77
  -2   8  11   84.36   28.51
  -2  -8  11   73.58   18.44
   2  -8 -10   35.26   17.62
   2  -8 -10   23.97   17.43
   2   8 -10   -6.93   19.61
  -2   8  10   10.27   25.62
  -2  -8  10   19.03   16.56
  -2  -8  10   25.95   14.80
   2  -8  -9  128.14   20.86
   2  -8  -9  214.94   29.00
   2   8  -9  123.58   23.52
  -2   8   9  143.76   32.74
  -2  -8   9  127.36   24.59
  -2  -8   9   92.99   25.23
   2  -8  -8  112.29   26.52
   2   8  -8   54.60   21.93
  -2   8   8   68.06   26.37
  -2   8   8   49.36   18.26
  -2  -8   8   57.84   21.71
  -2  -8   8   71.35   20.60
   2  -8  -7    2.28   21.90
   2   8  -7   36.36   16.52
  -2   8   7   45.06   14.46
  -2  -8   7    1.88   18.27
  -2  -8   7   -4.93   14.16
  -2   8   7    4.72   17.04
   2   8  -6   10.89   12.97
  -2   8   6   19.84   11.20
  -2   8   6   -2.33   15.73
  -2  -8   6    0.05   12.62
  -2  -8   6  -14.33   11.66
   2  -8  -5  355.06   43.95
   2   8  -5  438.00   28.69
  -2   8   5  422.14   34.28
  -2   8   5  451.21   28.66
  -2  -8   5  436.17   33.49
  -2  -8   5  452.42   36.31
   2  -8  -4   49.13   23.62
   2   8  -4   28.08   15.86
   2   8  -4   36.28   12.56
  -2   8   4   34.70   13.65
  -2   8   4   40.56   17.86
  -2  -8   4   55.83   17.90
   2  -8  -3  353.55   38.68
   2   8  -3  380.83   30.11
   2   8  -3  377.10   21.16
  -2   8   3  362.00   25.11
  -2   8   3  356.77   28.70
  -2  -8   3  365.85   36.53
   2   8  -2    0.04    6.50
   2   8  -2    5.25   16.35
  -2   8   2    3.94   11.29
  -2   8   2   46.71   12.05
  -2  -8   2   19.45   18.31
   2  -8  -1  501.56   41.17
   2   8  -1  426.56   16.98
   2   8  -1  454.09   33.04
  -2   8   1  430.83   26.32
  -2  -8   1  451.05   38.83
  -2   8   1  476.17   27.85
   2  -8   0  109.16   35.14
   2   8   0  144.34    8.80
   2   8   0  166.59   26.37
  -2   8   0  145.76   19.92
  -2   8   0  131.74   15.44
  -2  -8   0  165.54   28.18
   2  -8   1  474.83   46.53
   2   8   1  391.13   35.60
  -2   8  -1  393.90   22.17
  -2   8  -1  479.43   29.24
  -2  -8  -1  400.79   37.28
   2   8   2  -12.91   14.44
  -2   8  -2  -10.14    8.89
  -2   8  -2   13.59   13.84
  -2  -8  -2   -7.74   14.62
   2  -8   3  357.29   45.01
   2   8   3  396.93   34.03
  -2   8  -3  382.51   21.55
  -2   8  -3  409.69   30.56
  -2  -8  -3  368.87   36.73
   2  -8   4  -15.70   22.68
   2   8   4   58.15   20.76
  -2   8  -4   -4.33   14.23
  -2   8  -4    9.09    8.59
  -2  -8  -4    9.30   15.03
   2  -8   5  265.34   20.54
   2  -8   5  341.67   42.14
   2   8   5  268.64   32.57
  -2   8  -5  308.56   33.39
  -2  -8  -5  294.12   30.49
   2  -8   6   -2.55    8.15
   2  -8   6    6.32   19.69
   2   8   6  -15.37   19.20
  -2   8  -6   -5.11   14.80
  -2  -8  -6   -7.18   17.19
   2  -8   7  211.77   34.37
   2  -8   7  188.52   18.27
   2   8   7  233.16   39.21
  -2   8  -7  234.45   34.48
  -2  -8  -7  227.57   31.83
   2  -8   8   57.48   14.77
   2  -8   8   23.57   26.99
   2   8   8   76.77   31.46
  -2   8  -8   40.78   28.56
  -2  -8  -8   47.49   19.06
   2  -8   9  205.96   22.25
   2  -8   9  174.90   35.21
   2   8   9  182.17   34.93
  -2   8  -9  229.55   39.37
  -2  -8  -9  140.33   31.91
   2  -8  10   86.96   18.91
   2  -8  10   34.21   28.02
   2   8  10   49.17   36.98
  -2   8 -10   12.24   27.51
  -2  -8 -10   74.15   24.85
   2  -8  11  121.01   33.50
   2   8  11  122.17   35.56
  -2   8 -11   96.54   39.80
  -2  -8 -11  101.11   25.62
   2   8  12   18.58   24.68
  -2   8 -12   26.26   28.83
  -2  -8 -12  -10.50   21.05
   2   8  13   81.31   42.68
  -2   8 -13   66.16   39.90
  -2  -8 -13   60.83   29.31
   2   9 -14   33.19   32.10
  -2  -9  14    4.83   27.70
   2  -9 -13   85.92   26.47
   2   9 -13   42.33   34.45
  -2   9  13   23.35   29.09
  -2  -9  13   23.36   28.35
   2  -9 -12   -0.74   19.57
   2  -9 -12   10.24   20.72
   2   9 -12  -12.11   25.35
  -2   9  12   68.16   29.26
  -2  -9  12   -3.42   20.39
   2  -9 -11   14.06   18.09
   2  -9 -11   16.71   16.30
   2   9 -11   23.51   20.34
  -2   9  11   19.36   22.97
  -2  -9  11   -3.43   21.74
  -2  -9  11   10.58   18.45
   2  -9 -10    6.52   15.36
   2  -9 -10   -1.11   15.41
   2   9 -10    2.68   15.82
  -2   9  10   24.55   21.89
  -2  -9  10    7.07   17.63
  -2  -9  10  -16.99   16.42
   2  -9  -9    7.57   18.30
   2   9  -9   -0.29   16.73
   2  -9  -9  -12.91   13.94
  -2   9   9   -4.33   19.80
  -2  -9   9   13.19   15.97
  -2  -9   9   -5.06   15.62
   2  -9  -8   62.39   26.99
   2   9  -8   10.69   16.55
  -2   9   8   68.97   25.11
  -2   9   8   13.00   16.12
  -2  -9   8   23.85   21.56
  -2  -9   8   21.71   17.13
   2  -9  -7   64.02   25.78
   2   9  -7  134.26   23.30
  -2   9   7   70.02   23.44
  -2   9   7  147.61   20.67
  -2  -9   7   87.88   25.33
  -2  -9   7   53.32   26.68
   2  -9  -6   -8.14   25.20
   2   9  -6   20.30   16.86
  -2   9   6   21.69   13.71
  -2   9   6   50.03   20.65
  -2  -9   6   29.99   15.94
  -2  -9   6   31.19   22.24
   2  -9  -5   65.39   25.67
   2   9  -5   24.86   14.24
   2   9  -5   -0.05   18.74
  -2   9   5   22.72   14.11
  -2   9   5   17.82   18.41
  -2  -9   5  -11.85   17.76
   2  -9  -4   58.80   33.60
   2   9  -4   75.19   16.51
   2   9  -4   93.48   24.93
  -2   9   4  132.18   18.05
  -2   9   4   84.50   22.95
  -2  -9   4  107.99   24.41
   2  -9  -3   58.23   25.54
   2   9  -3   41.67   17.69
   2   9  -3   43.04   12.08
  -2   9   3   57.34   18.83
  -2   9   3   31.02   14.74
  -2  -9   3   55.87   20.95
   2  -9  -2  157.39   36.87
   2   9  -2   99.29   11.84
   2   9  -2  103.15   26.55
  -2   9   2  123.36   20.51
  -2   9   2  102.56   18.87
  -2  -9   2  144.05   28.25
   2   9  -1   90.03    9.19
   2  -9  -1   77.27   27.69
   2   9  -1   94.18   26.76
  -2   9   1   91.40   16.57
  -2   9   1  100.26   19.28
  -2  -9   1   79.62   23.37
   2  -9   0  398.38   44.79
   2   9   0  539.53   40.94
  -2   9   0  464.37   32.86
  -2   9   0  444.97   29.03
  -2  -9   0  445.60   42.47
   2  -9   1   70.54   30.62
   2   9   1   47.15   24.43
  -2   9  -1   47.67   16.30
  -2   9  -1   87.21   16.10
  -2  -9  -1   55.12   24.90
   2  -9   2  627.44   51.54
   2   9   2  578.10   42.09
  -2   9  -2  651.12   31.69
  -2   9  -2  644.62   37.60
  -2  -9  -2  627.27   42.72
   2  -9   3   21.05   27.36
   2   9   3   48.76   22.19
  -2   9  -3   11.77   11.39
  -2   9  -3    2.47   17.38
  -2  -9  -3   19.96   18.27
   2  -9   4  658.78   56.51
   2   9   4  668.37   46.18
  -2   9  -4  623.12   31.27
  -2   9  -4  660.03   45.78
  -2  -9  -4  637.61   49.01
   2  -9   5    3.84   25.33
  -2   9  -5  -11.93   12.25
  -2   9  -5   67.19   20.06
  -2  -9  -5   13.81   16.78
   2  -9   6   98.94   36.18
   2   9   6   96.31   35.04
  -2  -9  -6  197.19   32.19
  -2   9  -6   90.39   29.45
   2  -9   7   46.60   13.34
   2  -9   7  -16.00   21.25
   2   9   7   11.74   22.25
  -2   9  -7   -3.41   18.72
  -2  -9  -7  -10.53   21.99
   2  -9   8  177.48   24.01
   2  -9   8  169.75   41.47
   2   9   8  247.61   36.70
  -2   9  -8  302.91   41.08
  -2  -9  -8  244.77   35.19
   2  -9   9   35.18   24.99
   2   9   9   12.38   27.66
  -2   9  -9    0.15   24.84
  -2  -9  -9  -11.78   20.33
   2  -9  10  180.76   40.88
   2   9  10  213.81   40.79
  -2   9 -10  167.86   41.90
  -2  -9 -10  201.15   35.54
   2  -9  11  -10.67   29.20
   2   9  11  -13.40   29.01
  -2   9 -11   97.97   31.55
  -2  -9 -11   19.32   19.79
   2   9  12   36.51   40.35
  -2   9 -12   13.39   30.04
  -2  -9 -12   69.37   28.01
  -2   9 -13   25.26   38.26
   2  10 -13   23.43   31.89
  -2  10  13   29.12   35.02
  -2 -10  13    3.56   27.09
   2 -10 -12   39.68   27.28
   2  10 -12    7.87   24.91
  -2  10  12   80.29   34.70
  -2 -10  12  -22.58   24.73
   2 -10 -11   11.69   22.48
   2  10 -11   63.26   28.15
  -2  10  11   19.19   26.14
  -2 -10  11   11.98   25.56
   2 -10 -10   81.65   28.79
  -2  10  10   -8.10   31.25
  -2 -10  10   54.22   26.18
  -2 -10  10   24.66   21.08
   2 -10  -9   78.94   20.28
   2 -10  -9    2.14   21.72
   2  10  -9   10.06   23.20
  -2 -10   9   46.89   25.88
  -2  10   9   -3.83   29.71
  -2 -10   9    4.53   23.69
   2 -10  -8  103.38   34.89
   2  10  -8   71.42   26.44
  -2  10   8   81.28   20.34
  -2  10   8   58.54   32.16
  -2 -10   8   86.92   28.18
  -2 -10   8   56.06   29.71
   2 -10  -7   65.44   30.57
   2  10  -7   46.10   22.03
  -2  10   7   38.09   18.15
  -2  10   7   26.02   26.87
  -2 -10   7   70.71   27.80
   2 -10  -6  103.57   35.32
   2  10  -6   65.03   21.11
   2  10  -6   63.02   22.49
  -2  10   6   56.73   23.21
  -2  10   6   99.30   18.69
  -2 -10   6   80.81   30.77
   2 -10  -5  102.72   37.22
   2  10  -5  147.02   20.46
   2  10  -5  116.95   29.68
  -2  10   5   96.02   26.67
  -2  10   5   78.34   20.36
  -2 -10   5  135.11   33.48
   2 -10  -4  309.17   41.76
   2  10  -4  313.94   23.53
   2  10  -4  303.04   36.03
  -2  10   4  337.51   28.05
  -2  10   4  330.95   33.64
  -2 -10   4  312.62   37.63
   2 -10  -3  139.60   38.39
   2  10  -3  126.78   16.88
   2  10  -3  137.18   29.89
  -2  10   3  101.63   24.76
  -2  10   3  157.50   19.79
  -2 -10   3  153.76   28.38
   2 -10  -2  173.74   37.06
   2  10  -2  214.49   28.16
  -2  10   2  225.34   24.24
  -2  10   2  141.42   23.82
  -2 -10   2  116.97   34.71
   2 -10  -1  236.18   38.14
   2  10  -1  221.81   35.11
  -2  10   1  249.44   25.36
  -2  10   1  224.99   25.94
  -2 -10   1  167.29   36.86
   2 -10   0   42.04   34.70
   2  10   0   88.01   21.54
  -2  10   0   46.93   19.89
  -2  10   0   57.00   17.50
  -2 -10   0   62.89   30.02
   2 -10   1  374.08   44.11
   2  10   1  361.13   41.16
  -2  10  -1  371.39   29.42
  -2  10  -1  369.08   28.49
  -2 -10  -1  364.98   37.46
   2 -10   2   10.27   27.41
   2  10   2   33.86   22.19
  -2  10  -2    2.77   17.29
  -2  10  -2  -12.47   11.21
  -2 -10  -2   67.75   19.51
   2 -10   3  760.47   64.50
   2  10   3  774.82   57.37
  -2  10  -3  756.05   39.68
  -2  10  -3  807.82   46.47
  -2 -10  -3  710.71   51.76
   2 -10   4   25.90   30.19
   2  10   4   45.15   20.56
  -2  10  -4   10.78   16.83
  -2  10  -4    1.53   12.20
  -2 -10  -4   36.41   24.52
   2 -10   5  237.17   44.11
   2  10   5  182.16   36.69
  -2  10  -5  145.66   19.40
  -2  10  -5  107.48   26.90
  -2 -10  -5   95.46   34.81
   2 -10   6   68.38   32.34
   2  10   6    4.31   29.15
  -2  10  -6  -17.52   20.04
  -2 -10  -6   69.76   21.87
   2 -10   7  110.61   34.91
   2  10   7  136.85   40.49
  -2  10  -7  177.56   34.14
  -2 -10  -7  136.23   31.18
   2 -10   8    5.69   22.89
   2  10   8   33.96   27.90
  -2  10  -8  -14.34   20.03
  -2 -10  -8   16.81   23.35
   2 -10   9   70.18   42.08
   2  10   9  167.20   35.30
  -2  10  -9  102.11   32.80
  -2 -10  -9  147.47   36.76
   2 -10  10   10.26   31.04
   2  10  10  -20.57   32.50
  -2  10 -10   30.36   23.92
  -2 -10 -10   16.56   26.05
   2  10  11   62.43   46.45
  -2  10 -11  112.79   36.46
  -2 -10 -11   86.44   35.31
   2 -11 -12    2.90   25.28
   2  11 -12   -4.34   32.82
  -2  11  12   91.31   38.19
  -2 -11  12   14.59   22.37
   2 -11 -11   30.44   38.10
   2  11 -11  127.28   38.12
  -2  11  11  111.12   42.72
  -2 -11  11  110.69   35.57
   2 -11 -10   67.17   26.93
   2  11 -10   -0.92   24.23
  -2  11  10   71.59   27.81
  -2 -11  10   -0.10   23.42
  -2 -11  10   28.60   30.25
   2 -11  -9   64.70   36.62
   2  11  -9   65.82   29.27
  -2  11   9   76.55   35.81
  -2 -11   9  159.16   35.57
  -2 -11   9   33.32   25.60
   2 -11  -8   73.18   36.30
   2  11  -8   86.04   31.52
   2  11  -8   24.65   26.63
  -2  11   8  120.58   33.38
  -2 -11   8   43.52   34.37
   2 -11  -7   56.62   38.02
   2  11  -7   82.29   24.72
   2  11  -7   74.93   29.32
  -2  11   7   57.97   31.09
  -2 -11   7   57.50   27.08
   2 -11  -6   21.31   26.31
   2  11  -6   74.15   27.94
   2  11  -6   27.23   20.04
  -2  11   6   51.56   26.25
  -2  11   6   12.70   18.09
  -2 -11   6   71.20   31.18
   2 -11  -5   80.98   38.25
   2  11  -5   67.98   24.37
   2  11  -5   91.40   21.11
  -2  11   5   76.68   21.63
  -2  11   5   93.66   28.76
  -2 -11   5   80.73   34.83
   2 -11  -4   28.77   28.14
   2  11  -4   51.22   25.95
  -2  11   4   46.89   23.58
  -2  11   4   26.04   17.39
  -2 -11   4   55.65   29.59
   2 -11  -3  278.35   39.36
   2  11  -3  155.44   32.20
  -2  11   3  100.96   21.72
  -2  11   3   74.61   26.60
  -2 -11   3  114.17   35.90
   2 -11  -2   16.91   26.44
   2  11  -2   80.70   25.24
  -2  11   2   12.96   19.07
  -2  11   2    7.41   16.26
  -2 -11   2   -3.30   27.26
   2 -11  -1    5.37   27.01
   2  11  -1   19.20   24.77
  -2  11   1  -10.22   17.24
  -2  11   1   64.05   17.58
   2 -11   0    5.53   32.94
   2  11   0   35.73   24.96
  -2  11   0   54.65   18.89
  -2  11   0  -12.86   15.01
  -2 -11   0   45.08   22.29
   2 -11   1   83.45   29.29
   2  11   1   20.80   27.28
  -2  11  -1   13.26   17.54
  -2  11  -1   72.74   19.83
  -2 -11  -1   15.02   23.80
   2 -11   2  275.27   51.66
   2  11   2  194.49   34.98
  -2  11  -2  262.27   25.96
  -2  11  -2  275.62   33.05
  -2 -11  -2  235.66   42.60
   2 -11   3    2.87   31.64
   2  11   3   23.41   20.53
  -2  11  -3    9.34   20.26
  -2 -11  -3   23.35   27.75
   2 -11   4   63.37   33.85
   2  11   4   78.54   27.64
  -2  11  -4   93.98   29.79
  -2 -11  -4   82.81   34.32
   2 -11   5   78.58   34.88
   2  11   5   13.82   30.30
  -2  11  -5    8.04   24.25
   2 -11   6   93.15   31.37
   2  11   6   21.37   28.16
  -2  11  -6   69.00   29.29
  -2 -11  -6   42.70   27.35
   2 -11   7   64.87   40.13
   2  11   7  115.96   40.06
  -2  11  -7   42.80   33.74
  -2 -11  -7   99.80   35.84
   2 -11   8   33.67   41.20
   2  11   8   67.41   32.46
  -2  11  -8   68.87   35.27
  -2 -11  -8   68.10   27.08
   2 -11   9   65.07   33.16
   2  11   9   73.33   33.53
  -2  11  -9   30.83   34.79
  -2 -11  -9   38.15   28.50
   2  11  10   -6.49   45.27
  -2  11 -10   78.13   40.55
  -2 -11 -10  113.48   36.12
   2 -12 -10   72.79   36.40
   2  12 -10  149.59   33.08
  -2  12  10   58.25   36.00
   2 -12  -9   11.94   27.81
   2  12  -9   69.96   31.13
  -2  12   9    9.45   34.18
  -2 -12   9    8.33   32.14
   2 -12  -8   78.63   33.07
   2  12  -8   58.58   28.85
  -2 -12   8   23.69   35.20
  -2  12   8   90.38   36.27
   2 -12  -7   34.21   33.93
   2  12  -7   48.01   28.32
  -2  12   7  -18.30   29.83
  -2 -12   7   16.09   30.93
   2 -12  -6   61.12   32.16
   2  12  -6    3.41   29.33
  -2  12   6   93.20   31.11
  -2 -12   6   29.58   34.90
   2 -12  -5   82.58   37.08
   2  12  -5    6.16   23.68
  -2  12   5    3.59   24.82
  -2 -12   5   53.11   31.60
   2  12  -4  127.76   34.92
   2 -12  -4   92.51   41.34
  -2  12   4   94.16   30.34
  -2 -12   4  142.42   34.66
   2 -12  -3   38.91   34.20
   2  12  -3   49.09   28.73
  -2  12   3    1.78   21.59
  -2  12   3   10.53   17.28
  -2 -12   3   29.23   30.54
   2 -12  -2  197.64   47.60
   2  12  -2  169.44   37.80
  -2  12   2  123.12   24.97
  -2  12   2  105.26   30.15
  -2 -12   2  195.79   43.09
   2 -12  -1  -27.27   29.03
   2  12  -1   34.87   23.81
  -2  12   1   43.16   20.31
  -2  12   1   36.18   19.77
  -2 -12   1   10.51   25.44
   2 -12   0  153.90   43.38
   2  12   0   93.11   35.23
  -2  12   0   44.96   23.39
  -2 -12   0   69.45   30.51
   2 -12   1   15.84   28.77
   2  12   1    0.77   26.15
  -2  12  -1    9.74   19.77
  -2 -12  -1   37.67   28.97
   2 -12   2  -28.84   27.98
   2  12   2   -6.67   21.37
  -2  12  -2   -6.45   19.35
  -2 -12  -2    8.30   26.90
   2 -12   3   -6.84   23.61
   2  12   3   -1.49   23.23
  -2  12  -3    0.30   18.05
  -2 -12  -3   -0.66   19.24
   2 -12   4   12.53   33.29
   2  12   4   13.71   23.52
  -2  12  -4   16.69   23.21
  -2 -12  -4   -2.17   23.57
   2 -12   5  -20.80   35.84
   2  12   5    1.54   31.67
  -2  12  -5   31.31   25.89
  -2 -12  -5   26.59   25.35
   2 -12   6   39.57   41.62
   2  12   6   63.59   29.70
  -2  12  -6   23.10   30.09
  -2 -12  -6    1.74   35.38
   2 -12   7  -17.81   31.82
   2  12   7   13.90   28.20
  -2  12  -7    3.59   19.85
   2 -12   8   43.85   44.69
   2  12   8   80.81   41.25
  -2  12  -8    9.45   28.85
  -2 -12  -8   46.66   29.57
   2 -13  -7   50.11   35.37
   2  13  -7   36.92   37.15
  -2 -13   7   76.22   40.86
   2 -13  -6  147.54   42.81
   2  13  -6    9.93   32.99
  -2 -13   6   -2.98   38.58
   2 -13  -5   12.40   37.33
   2  13  -5   31.60   28.23
  -2 -13   5    0.30   26.97
   2 -13  -4   47.95   39.10
   2  13  -4   10.47   25.67
  -2 -13   4    9.36   34.65
   2 -13  -3    8.69   44.13
   2  13  -3   71.31   34.34
  -2 -13   3  126.84   42.71
   2 -13  -2   37.23   33.90
   2  13  -2   62.63   31.56
  -2 -13   2   32.65   31.79
   2 -13  -1   18.00   41.99
   2  13  -1   -7.58   32.72
  -2 -13   1   63.30   28.92
   2 -13   0   95.08   40.44
   2  13   0  139.31   37.81
  -2 -13   0   74.35   43.12
   2 -13   1   99.78   36.06
   2  13   1   40.14   32.57
  -2 -13  -1    9.94   31.27
   2 -13   2   64.85   39.69
   2  13   2   78.32   32.81
  -2  13  -2  134.36   31.78
  -2 -13  -2   85.12   41.60
   2 -13   3    3.23   30.20
   2  13   3    5.34   29.13
  -2  13  -3  -16.30   23.38
  -2 -13  -3  -18.89   24.89
   2 -13   4   -0.19   48.26
   2  13   4   90.81   37.69
  -2  13  -4   40.46   24.30
  -2 -13  -4   73.51   39.96
   2 -13   5  -33.49   34.00
   2  13   5   12.62   34.69
  -2  13  -5   54.14   22.99
  -2 -13  -5  -22.10   33.20
   2 -13   6    8.07   39.56
   2  13   6   68.54   30.06
  -2  13  -6   -4.38   29.86
  -2 -13  -6  -20.22   28.19
   2 -14  -3   21.16   36.24
   2  14  -3   70.88   35.32
  -2 -14   3    2.15   32.69
   2 -14  -2   46.49   39.85
   2  14  -2  -17.78   33.45
  -2 -14   2   28.47   37.73
   2 -14  -1   26.75   39.75
   2  14  -1   77.12   39.91
  -2 -14   1   88.05   43.69
   2 -14   0  -16.76   28.15
   2  14   0   -2.64   29.73
  -2 -14   0    5.52   26.99
   2 -14   1  -28.69   43.96
   2  14   1   16.65   27.55
  -2 -14  -1   39.19   30.11
  -3   0  19   -2.93   22.23
   3   0 -18  160.09   47.65
  -3   0  18  178.88   42.64
   3   0 -17   24.22   22.33
  -3   0  17   -9.71   25.33
   3   0 -16   54.90   27.96
  -3   0  16   63.71   29.09
   3   0 -15   -8.63   26.30
  -3   0  15  -22.51   22.09
   3   0 -14  297.07   34.67
  -3   0  14  284.56   32.39
   3   0 -13   16.45   21.92
   3   0 -12   55.21   22.84
  -3   0  12   26.21   17.86
   3   0 -11   23.10   15.93
  -3   0  11  -14.80   14.36
   3   0 -10  352.41   32.83
  -3   0  10  424.04   33.60
  -3   0   9   -6.38   10.86
   3   0  -8  118.95   16.10
  -3   0   8  150.72   15.86
   3   0  -7    6.75    7.26
   3   0  -7    0.98    1.42
  -3   0   7    2.96    8.08
   3   0  -6  802.19   13.23
   3   0  -6  801.33   29.49
  -3   0   6  881.82   28.53
   3   0  -5    3.07    5.95
  -3   0   5   -1.13    5.97
  -3   0   4    0.26    4.83
  -3   0   4    1.21    5.03
  -3   0   3    3.60    4.75
  -3   0   3   18.94    5.40
  -3   0   3   12.98    4.69
  -3   0   2  421.15   13.38
  -3   0   2  429.69   14.88
  -3   0   2  412.11   14.73
  -3   0   1    2.16    4.86
  -3   0   1    0.51    3.09
  -3   0   1    0.03    3.65
   3   0   0 2000.92   31.75
  -3   0   0 1960.30   35.53
  -3   0   0 1986.97   38.44
   3   0   1    4.00    3.98
  -3   0  -1   -4.17    4.57
  -3   0  -1    1.81    4.43
   3   0   2  242.57   12.62
  -3   0  -2  201.71   12.45
  -3   0  -2  248.79   13.52
   3   0   3    8.77    7.05
  -3   0  -3   -1.06    7.37
  -3   0  -3   21.00    7.38
   3   0   4 1828.10   44.17
  -3   0  -4 1794.84   46.41
  -3   0  -4 1797.24   45.12
   3   0   5    4.53    7.85
  -3   0  -5   -1.92    5.45
  -3   0  -5    1.43    7.93
   3   0   6 1581.92   48.34
  -3   0  -6 1568.22   49.00
  -3   0  -6 1578.39   45.22
   3   0   7   -0.42   11.22
  -3   0  -7   -3.14    8.70
  -3   0  -7    0.06   10.77
   3   0   8 1045.94   46.50
  -3   0  -8 1078.38   46.30
  -3   0  -8 1044.27   39.99
   3   0   9    1.22   15.18
  -3   0  -9    0.80   10.54
  -3   0  -9   14.73   16.25
   3   0  10   75.67   23.03
  -3   0 -10   94.07   16.99
  -3   0 -10   65.43   24.39
   3   0  11   -4.53   13.32
  -3   0 -11   17.72   17.70
   3   0  12  291.18   24.80
   3   0  12  281.22   36.60
  -3   0 -12  335.69   39.40
   3   0  13   17.76   13.73
  -3   0 -13   28.29   20.27
   3   0  14  174.15   35.59
  -3   0 -14  129.67   37.91
   3   0  15   23.59   27.11
  -3   0 -15    7.41   28.21
   3   0  16    7.61   31.45
  -3   0 -16   32.04   33.69
   3   1 -19   69.61   37.07
   3  -1 -19  116.38   45.41
  -3  -1  19   97.94   42.45
  -3   1  19  161.94   44.29
   3   1 -18   -3.46   23.98
   3  -1 -18   50.13   29.65
  -3  -1  18   10.45   26.08
  -3   1  18  -25.22   25.65
   3  -1 -17  163.60   34.29
   3   1 -17  172.37   35.16
  -3  -1  17   93.53   37.23
  -3   1  17   85.00   30.86
   3   1 -16   38.76   30.54
   3  -1 -16   82.17   30.39
  -3  -1  16   30.57   28.47
  -3   1  16   10.63   23.28
   3  -1 -15   95.91   33.63
   3   1 -15  102.89   32.24
  -3   1  15   93.79   30.66
  -3  -1  15   44.64   24.54
   3   1 -14   -3.30   17.86
   3  -1 -14   44.00   18.84
  -3  -1  14    8.50   19.95
  -3   1  14    4.13   21.23
   3   1 -13  277.07   33.18
   3  -1 -13  288.83   32.50
  -3  -1  13  293.07   30.12
  -3   1  13  322.81   36.82
   3   1 -12  208.79   33.09
   3  -1 -12  175.00   26.30
  -3  -1  12  197.90   25.31
  -3   1  12  183.43   24.48
   3  -1 -11  876.88   48.77
   3   1 -11  970.53   48.49
  -3  -1  11 1005.76   47.91
  -3   1  11  837.07   43.43
   3   1 -10  408.72   30.74
   3  -1 -10  369.35   30.06
  -3   1  10  453.04   29.58
  -3  -1  10  454.57   29.51
   3  -1  -9 1064.18   43.54
   3   1  -9 1120.26   45.77
  -3  -1   9 1071.34   42.47
  -3   1   9 1075.00   43.53
   3   1  -8   -6.69    9.68
   3  -1  -8    8.04    2.51
   3  -1  -8    3.00    9.61
  -3  -1   8   10.57   10.71
   3   1  -7   99.30    2.27
   3   1  -7   88.84   13.62
   3  -1  -7  112.49   14.43
   3  -1  -7  117.69    6.79
  -3  -1   7  110.97   12.54
  -3   1   7  106.36   12.77
   3   1  -6   98.78   13.71
   3  -1  -6   92.14    6.67
   3  -1  -6   85.71   12.30
  -3  -1   6   85.37   10.73
  -3  -1   6   88.15    3.97
  -3   1   6  111.30   13.16
   3   1  -5  146.16   14.01
   3  -1  -5  153.01    8.39
  -3  -1   5  170.79   12.04
  -3  -1   5  177.72    6.78
  -3   1   5  157.35   14.55
  -3   1   5  177.02   11.94
   3   1  -4   49.83    9.44
   3  -1  -4   45.87    6.71
  -3  -1   4   38.46    4.48
  -3  -1   4   61.13    7.55
  -3   1   4   55.86    7.04
  -3   1   4   51.05   10.12
   3  -1  -3  155.59    9.61
  -3   1   3  147.72   10.99
  -3  -1   3  138.30    8.09
  -3   1   3  145.89    8.59
  -3  -1   3  126.22   10.40
  -3  -1   3  161.85   10.83
   3  -1  -2  130.45   10.41
  -3  -1   2  166.34    9.69
  -3  -1   2  147.92    8.91
  -3   1   2  142.76    9.85
  -3   1   2  140.15    6.34
  -3  -1   2  157.20    9.63
   3  -1  -1   49.30    8.61
  -3  -1   1   37.52    6.28
  -3  -1   1   41.98    5.98
  -3  -1   1   42.65    5.48
  -3   1   1   39.14    2.94
  -3   1   1   54.54    8.53
   3  -1   0  104.23    9.39
   3   1   0   97.97    9.29
   3  -1   0  103.53    4.86
   3  -1   0   99.48    4.07
  -3  -1   0  104.58    6.50
  -3   1   0   99.87    8.79
  -3  -1   0   98.05    9.92
   3   1   1   78.90    9.06
   3  -1   1   64.71    5.01
  -3  -1  -1   36.83    8.83
  -3   1  -1   54.42    9.46
  -3  -1  -1   55.74    5.94
  -3   1  -1   61.56    8.54
   3   1   2  212.38   12.95
   3  -1   2  230.51    9.27
  -3  -1  -2  220.82   12.91
  -3   1  -2  208.65   14.14
  -3   1  -2  204.07   13.06
  -3  -1  -2  215.06   10.75
   3   1   3    9.79    7.30
   3  -1   3    7.58    5.85
  -3  -1  -3   22.43    5.83
  -3  -1  -3   22.51    7.90
  -3   1  -3    4.61    6.78
   3  -1   4  465.52   18.92
   3   1   4  481.04   24.71
  -3  -1  -4  460.32   20.21
  -3   1  -4  441.36   22.23
  -3   1  -4  419.33   20.55
  -3  -1  -4  496.24   22.02
   3   1   5  178.65   18.20
   3  -1   5  159.30   14.76
  -3   1  -5  151.94   18.75
  -3  -1  -5  180.39   15.80
  -3  -1  -5  151.76   15.20
  -3   1  -5  183.31   15.80
   3   1   6  107.85   19.62
   3  -1   6  145.92   15.95
  -3   1  -6  115.19   13.37
  -3  -1  -6  126.29   13.25
  -3   1  -6  127.54   19.88
  -3  -1  -6  158.82   16.96
   3   1   7  351.82   26.59
   3  -1   7  430.65   26.82
  -3   1  -7  420.87   32.95
  -3  -1  -7  443.60   24.71
  -3  -1  -7  429.69   28.14
   3   1   8   64.67   18.52
   3  -1   8  102.46   16.15
   3  -1   8   53.40   17.97
  -3  -1  -8   59.65   15.04
  -3   1  -8  123.56   22.94
  -3  -1  -8  104.04   19.01
   3  -1   9  141.96   21.28
   3   1   9  107.56   27.17
   3  -1   9  205.54   19.95
  -3   1  -9  129.51   27.24
  -3  -1  -9  124.35   18.14
  -3  -1  -9  123.92   23.55
   3  -1  10  129.57   22.60
   3  -1  10  109.34   18.08
   3   1  10   90.94   21.88
  -3  -1 -10   97.86   24.78
  -3  -1 -10   80.50   17.45
  -3   1 -10  128.59   27.21
   3  -1  11  295.90   27.38
   3   1  11  298.81   31.21
   3  -1  11  295.92   26.05
  -3  -1 -11  352.76   33.89
  -3  -1 -11  286.39   25.68
  -3   1 -11  266.48   36.73
   3   1  12   14.74   20.98
   3  -1  12   16.63   12.47
   3  -1  12    4.45   15.23
  -3  -1 -12   12.28   12.67
  -3   1 -12  -13.58   20.55
  -3  -1 -12   -6.29   16.03
   3  -1  13  237.97   29.34
   3   1  13  235.70   38.07
  -3  -1 -13  241.06   25.49
  -3   1 -13  196.36   38.21
  -3  -1 -13  175.82   36.34
   3  -1  14   45.70   21.69
   3   1  14   48.94   23.14
  -3  -1 -14   -1.57   28.02
  -3   1 -14   35.87   30.29
   3  -1  15   65.76   27.12
   3   1  15  171.94   37.48
  -3  -1 -15  131.62   37.45
  -3   1 -15   92.40   31.94
   3  -1  16    0.91   23.42
   3   1  16  -11.05   27.66
  -3   1 -16  -10.44   23.97
  -3  -1 -16   -0.86   27.06
   3   2 -18   33.68   35.13
   3  -2 -18   87.81   37.37
  -3   2  18   -2.07   28.41
  -3  -2  18   65.80   33.10
   3  -2 -17   39.97   27.24
  -3  -2  17    4.89   24.36
  -3   2  17  -24.82   26.43
   3   2 -16   97.09   35.85
   3  -2 -16   99.48   31.50
  -3  -2  16  114.89   28.10
  -3   2  16  104.01   35.61
   3   2 -15   10.84   26.60
   3  -2 -15   18.65   21.69
  -3  -2  15   57.65   24.52
  -3   2  15   22.24   21.27
   3   2 -14   -5.57   23.01
   3  -2 -14   10.08   17.81
  -3  -2  14   32.81   20.21
  -3   2  14    5.18   20.82
   3   2 -13   43.24   21.17
   3  -2 -13    0.07   16.58
  -3  -2  13   19.55   19.34
  -3   2  13  -11.02   19.53
   3   2 -12  121.41   29.58
   3  -2 -12  119.49   27.64
  -3  -2  12   92.15   24.45
  -3   2  12  109.39   25.50
   3   2 -11  747.89   48.43
   3  -2 -11  666.30   41.06
  -3  -2  11  680.63   38.70
  -3   2  11  691.69   39.85
   3   2 -10  247.23   26.16
   3  -2 -10  269.32   26.23
   3  -2 -10  253.06    9.64
  -3  -2  10  282.29   24.55
  -3   2  10  218.72   26.90
   3   2  -9  522.24   31.13
   3  -2  -9  445.42   31.41
   3  -2  -9  524.42   15.65
  -3  -2   9  512.80   30.77
  -3   2   9  548.76   31.91
   3   2  -8   62.48   17.17
   3  -2  -8  105.35   15.19
   3  -2  -8   86.68    7.48
  -3  -2   8   66.19    2.83
  -3   2   8   69.99   13.55
  -3  -2   8   79.90   13.61
   3   2  -7 1627.17   50.48
   3  -2  -7 1584.08   51.35
   3  -2  -7 1579.44   34.31
  -3  -2   7 1501.90   21.37
  -3  -2   7 1541.51   45.51
  -3   2   7 1578.32   47.09
   3   2  -6  396.85   22.03
   3  -2  -6  419.99   16.24
  -3  -2   6  392.32   20.05
  -3  -2   6  404.33   10.73
  -3   2   6  387.31   20.98
  -3   2   6  426.88   21.60
   3  -2  -5  905.60   25.48
   3   2  -5  877.53   29.21
  -3   2   5  898.27   27.48
  -3  -2   5  932.19   19.54
  -3   2   5  901.45   30.27
  -3  -2   5  869.85   29.12
   3   2  -4   35.92    8.38
   3  -2  -4   38.03    8.42
  -3  -2   4   49.23    7.93
  -3  -2   4   46.10    5.37
  -3   2   4   36.60    8.41
  -3   2   4   41.67    7.49
   3   2  -3 1487.48   31.45
   3  -2  -3 1522.00   34.89
  -3  -2   3 1511.07   30.90
  -3  -2   3 1548.13   36.40
  -3   2   3 1526.50   26.99
  -3   2   3 1491.66   37.60
   3  -2  -2  364.25   17.22
  -3   2   2  330.34   16.81
  -3  -2   2  324.23   13.15
  -3   2   2  347.99    8.87
  -3  -2   2  335.66   15.77
   3   2  -1  902.18   26.06
   3  -2  -1  946.62   26.55
   3  -2  -1  923.57   11.55
  -3  -2   1  982.78   17.43
  -3  -2   1  954.00   26.51
  -3   2   1  972.47   28.22
  -3   2   1  924.51   10.71
   3   2   0  949.44   28.66
   3  -2   0  962.40   28.05
  -3  -2   0  986.06   16.14
  -3  -2   0  980.06   27.35
  -3   2   0 1005.70   28.89
   3   2   1  260.78   16.42
   3  -2   1  263.02    5.01
   3  -2   1  268.65   16.65
  -3   2  -1  254.98    5.11
  -3  -2  -1  271.47    7.78
  -3  -2  -1  277.01   14.36
  -3   2  -1  293.57   17.17
   3   2   2  543.63   22.09
   3  -2   2  541.34   11.65
   3  -2   2  540.71   21.70
  -3   2  -2  530.73   22.09
  -3  -2  -2  541.76   13.60
  -3  -2  -2  561.81   21.30
   3   2   3  261.15   17.11
   3  -2   3  259.17   17.76
   3  -2   3  259.64    9.68
  -3  -2  -3  273.63   16.64
  -3  -2  -3  241.10   11.07
  -3   2  -3  217.15   18.81
   3   2   4  120.02   17.22
   3  -2   4  146.10   13.21
   3  -2   4  138.32    9.16
  -3  -2  -4  131.16   12.47
  -3  -2  -4  117.76   10.53
  -3   2  -4  120.87   14.42
   3   2   5  934.74   37.88
   3  -2   5  973.73   34.33
   3  -2   5  987.61   27.96
  -3  -2  -5  977.37   30.71
  -3  -2  -5 1006.43   35.75
  -3   2  -5 1043.14   40.25
   3  -2   6  239.89   16.91
   3   2   6  243.29   25.49
   3  -2   6  250.89   20.73
  -3  -2  -6  262.21   20.32
  -3  -2  -6  262.99   18.65
  -3   2  -6  220.14   24.64
   3   2   7  418.31   33.76
   3  -2   7  386.16   24.60
   3  -2   7  384.28   23.30
  -3  -2  -7  390.32   25.26
  -3  -2  -7  378.45   24.85
  -3   2  -7  399.82   32.52
   3   2   8   49.64   22.07
   3  -2   8   48.11   15.17
   3  -2   8   36.17   14.26
  -3  -2  -8   39.23   14.89
  -3  -2  -8   41.65   16.50
  -3   2  -8   88.15   18.56
   3   2   9  261.10   33.87
   3  -2   9  211.54   22.79
   3  -2   9  259.21   24.84
  -3  -2  -9  296.06   28.01
  -3  -2  -9  267.13   23.47
  -3   2  -9  259.27   28.51
   3   2  10   -2.96   16.32
   3  -2  10   14.84   13.58
   3  -2  10    4.45   11.95
  -3  -2 -10   -4.30   15.91
  -3  -2 -10   12.84   12.61
  -3   2 -10   48.92   20.89
   3   2  11   20.98   23.64
   3  -2  11   48.04   17.74
   3  -2  11   46.24   14.87
  -3  -2 -11   17.63   16.25
  -3  -2 -11    4.59   13.81
  -3   2 -11   57.90   24.81
   3   2  12   71.38   32.38
   3  -2  12   82.70   18.63
   3  -2  12  105.93   25.32
  -3  -2 -12  123.43   27.87
  -3  -2 -12  100.83   20.54
  -3   2 -12  133.83   31.89
   3   2  13  -20.78   21.42
   3  -2  13    4.38   16.92
  -3  -2 -13   23.18   18.26
  -3  -2 -13   -8.00   12.00
  -3   2 -13   -2.26   20.53
   3   2  14   98.12   30.44
   3  -2  14   59.18   31.72
  -3  -2 -14   83.85   32.28
  -3   2 -14  118.74   30.34
   3   2  15   -1.38   32.10
   3  -2  15   32.51   28.62
  -3  -2 -15   73.30   30.62
  -3   2 -15   20.02   33.41
   3   2  16   99.32   36.15
   3  -2  16  -29.57   30.54
  -3  -2 -16   86.44   34.51
  -3   2 -16    7.99   37.17
   3   3 -18   11.87   37.95
   3  -3 -18   35.48   36.65
  -3  -3  18   47.04   34.16
  -3   3  18   77.39   38.20
   3   3 -17  -27.78   27.85
   3  -3 -17   -9.78   28.72
  -3  -3  17   15.44   20.86
  -3   3  17  -27.21   25.64
   3  -3 -16   -3.26   21.70
   3   3 -16   -3.27   22.54
  -3  -3  16  -13.46   23.09
  -3   3  16   59.69   21.01
   3   3 -15   60.68   22.26
   3  -3 -15    2.72   20.86
  -3  -3  15  -23.74   23.07
  -3   3  15   27.49   24.73
   3   3 -14  169.18   35.24
   3  -3 -14  127.62   31.78
  -3  -3  14  169.63   32.27
  -3   3  14  176.17   28.06
   3   3 -13   -3.15   23.07
   3  -3 -13   15.68   21.91
  -3  -3  13   53.49   20.32
  -3   3  13   -1.52   21.47
   3   3 -12   75.08   23.78
   3  -3 -12  134.07   26.45
  -3  -3  12  118.58   20.94
  -3   3  12  100.84   22.74
   3   3 -11    9.86   18.65
   3  -3 -11    7.26   17.04
   3  -3 -11    0.73    4.73
  -3  -3  11   33.46   13.29
  -3   3  11   52.45   18.18
   3   3 -10  335.09   33.22
   3  -3 -10  295.72   14.14
   3  -3 -10  301.56   26.35
  -3  -3  10  284.52   28.42
  -3   3  10  270.96   29.96
   3   3  -9    6.98   13.97
   3  -3  -9   -8.38   13.35
   3  -3  -9   11.02    5.88
  -3   3   9   -3.00   11.09
  -3  -3   9  -12.03   12.10
   3   3  -8  610.31   32.46
   3  -3  -8  617.71   31.25
   3  -3  -8  611.92   25.01
  -3  -3   8  591.49   29.87
  -3  -3   8  595.30   15.54
  -3   3   8  549.46   32.10
   3   3  -7   93.47   14.38
   3  -3  -7  113.20   12.46
  -3  -3   7  119.33    7.91
  -3  -3   7  109.03   16.50
  -3   3   7  121.48   15.01
  -3   3   7  141.63   17.01
   3   3  -6 1021.13   36.96
   3  -3  -6 1001.89   33.66
  -3  -3   6 1087.68   24.81
  -3  -3   6  998.86   35.01
  -3   3   6 1064.25   36.73
  -3   3   6 1051.31   35.89
   3   3  -5  567.34   23.99
   3  -3  -5  633.22   26.19
  -3  -3   5  615.45   25.50
  -3  -3   5  604.41   18.65
  -3   3   5  613.16   24.66
  -3   3   5  596.14   24.16
   3   3  -4 4221.38   69.26
   3  -3  -4 4278.30   77.24
  -3  -3   4 4180.05   65.91
  -3  -3   4 4305.32   79.71
  -3   3   4 4351.43   67.21
  -3   3   4 4361.76   79.84
   3   3  -3   54.80    7.47
   3  -3  -3   76.77   12.48
  -3  -3   3   56.93    7.82
  -3  -3   3   73.30    9.47
  -3   3   3   77.54   10.94
  -3   3   3   74.73    6.56
   3   3  -2 2586.13   36.50
   3  -3  -2 2490.82   54.87
  -3  -3   2 2534.37   53.88
  -3  -3   2 2587.14   51.69
  -3   3   2 2518.93   32.97
  -3   3   2 2550.34   54.32
   3   3  -1 1411.07   38.18
   3   3  -1 1405.13   19.82
   3  -3  -1 1341.11   15.58
   3  -3  -1 1403.46   37.68
  -3  -3   1 1352.47   35.61
  -3   3   1 1375.05   36.59
  -3   3   1 1360.82   15.04
   3   3   0 1727.93   17.30
   3   3   0 1699.54   44.65
   3  -3   0 1637.80   43.89
  -3  -3   0 1616.22   40.50
  -3   3   0 1639.45   42.55
   3   3   1  384.10   22.26
   3  -3   1  403.19   21.61
  -3  -3  -1  345.13   19.33
  -3  -3  -1  371.27    6.16
  -3   3  -1  388.68   20.66
   3   3   2 1254.29   41.68
   3  -3   2 1236.21   39.29
   3  -3   2 1221.99   16.50
  -3  -3  -2 1292.59   37.68
  -3  -3  -2 1251.47   18.09
  -3   3  -2 1215.25   39.76
   3   3   3   56.48   15.05
   3  -3   3   82.89   13.91
   3  -3   3   77.01    5.46
  -3  -3  -3   60.18    5.22
  -3  -3  -3   95.59   12.40
  -3   3  -3   55.88   12.19
   3   3   4  305.78   25.73
   3  -3   4  354.66   12.65
   3  -3   4  374.68   23.76
  -3  -3  -4  361.31   13.34
  -3  -3  -4  337.61   21.92
  -3   3  -4  350.11   25.17
   3   3   5  207.78   23.56
   3  -3   5  208.92   20.38
   3  -3   5  215.52   13.29
  -3  -3  -5  202.51   13.06
  -3  -3  -5  176.13   18.61
  -3   3  -5  208.42   20.51
   3   3   6  604.17   34.60
   3  -3   6  542.91   30.95
   3  -3   6  610.66   24.36
  -3  -3  -6  565.57   24.51
  -3  -3  -6  586.84   29.97
  -3   3  -6  608.75   37.59
   3   3   7   42.94   17.51
   3  -3   7   36.48   14.02
   3  -3   7   61.65   11.94
  -3  -3  -7   10.36   10.23
  -3  -3  -7   13.94   12.45
  -3   3  -7   34.30   16.42
   3   3   8  177.28   32.19
   3  -3   8  204.97   22.44
   3  -3   8  189.65   19.70
  -3  -3  -8  229.07   21.78
  -3  -3  -8  180.91   21.74
  -3   3  -8  220.00   25.34
   3  -3   9   -7.50   13.89
   3   3   9  -10.37   22.60
   3  -3   9   55.32   14.48
  -3  -3  -9    3.47   14.53
  -3   3  -9   27.20   20.83
  -3  -3  -9   28.87   11.80
   3   3  10  107.54   25.11
   3  -3  10   92.90   17.90
   3  -3  10  151.87   20.16
  -3  -3 -10  116.03   21.51
  -3  -3 -10   70.26   19.60
  -3   3 -10  116.37   24.43
   3   3  11   83.14   30.62
   3  -3  11   58.35   17.88
   3  -3  11   53.77   22.44
  -3  -3 -11   88.46   19.30
  -3  -3 -11   68.97   22.86
  -3   3 -11   76.92   28.88
   3  -3  12   86.32   19.92
   3  -3  12  108.67   23.69
   3   3  12   80.07   34.25
  -3  -3 -12   58.47   25.17
  -3  -3 -12  121.67   20.87
  -3   3 -12  114.34   33.25
   3   3  13   -9.89   27.95
   3  -3  13   35.88   17.20
  -3  -3 -13    9.55   15.15
  -3  -3 -13   41.30   22.49
  -3   3 -13   17.75   22.66
   3   3  14   -2.76   25.30
   3  -3  14    9.56   20.54
  -3  -3 -14   13.70   22.07
  -3   3 -14    0.84   22.75
   3   3  15   53.64   36.17
   3  -3  15   35.11   28.15
  -3  -3 -15    2.45   28.29
  -3   3 -15   66.82   34.56
  -3   3 -16   -7.79   31.61
   3   4 -18   19.82   36.76
   3  -4 -18   -5.29   30.02
  -3  -4  18  100.59   33.86
  -3   4  18   31.50   35.07
   3   4 -17   -8.50   27.03
   3  -4 -17    3.11   21.47
  -3  -4  17  -15.81   19.46
  -3   4  17   35.03   21.13
   3   4 -16   40.90   26.54
   3  -4 -16   61.23   25.99
  -3  -4  16   23.22   23.22
  -3   4  16   42.14   29.53
   3   4 -15   -2.84   32.56
   3  -4 -15   87.96   26.48
  -3  -4  15  104.14   24.30
  -3   4  15   41.18   30.36
   3   4 -14   77.88   25.31
   3  -4 -14   98.71   29.31
  -3  -4  14   74.12   26.03
  -3   4  14   46.53   24.51
   3   4 -13  146.44   27.58
   3  -4 -13  122.34   26.32
  -3  -4  13  163.24   24.13
  -3   4  13  187.59   27.81
   3   4 -12   52.60   23.93
   3  -4 -12   27.92   17.66
   3  -4 -12   31.66    8.24
  -3  -4  12   43.53   17.05
  -3   4  12   50.66   22.96
   3   4 -11  232.28   27.46
   3  -4 -11  178.81   14.56
   3  -4 -11  167.01   27.94
  -3  -4  11  185.49   23.45
  -3   4  11  231.39   29.25
   3   4 -10  323.53   29.67
   3  -4 -10  294.64   19.60
   3  -4 -10  258.77   26.61
  -3  -4  10  325.25   26.08
  -3   4  10  294.24   28.94
   3  -4  -9  206.52   18.50
   3  -4  -9  186.26   21.51
   3   4  -9  164.68   22.95
  -3  -4   9  182.24   10.16
  -3  -4   9  173.80   20.42
  -3   4   9  204.88   22.76
   3   4  -8  128.14   18.91
   3  -4  -8  144.06   18.16
  -3  -4   8  149.66   10.26
  -3  -4   8  162.67   18.01
  -3   4   8  146.68   17.87
  -3   4   8  116.76   21.21
   3   4  -7  632.22   29.76
   3  -4  -7  634.58   30.54
  -3  -4   7  595.68   20.90
  -3  -4   7  668.47   33.37
  -3   4   7  620.14   30.24
  -3   4   7  600.59   32.46
   3   4  -6  260.20   20.23
   3  -4  -6  317.57   20.73
  -3  -4   6  265.90   14.37
  -3  -4   6  262.96   19.24
  -3   4   6  287.57   19.73
  -3   4   6  288.66   21.10
   3   4  -5 3073.57   64.03
   3  -4  -5 3120.43   75.61
  -3  -4   5 3030.72   70.26
  -3  -4   5 3022.75   59.69
  -3   4   5 3048.31   70.65
  -3   4   5 3088.04   65.79
   3   4  -4  384.40   17.99
   3  -4  -4  388.81   22.67
  -3  -4   4  403.90   19.69
  -3  -4   4  392.63   22.67
  -3   4   4  383.53   17.52
  -3   4   4  384.10   21.77
   3   4  -3 3122.77   50.14
   3  -4  -3 3134.63   72.58
  -3  -4   3 3072.14   67.61
  -3  -4   3 3171.33   64.97
  -3   4   3 3136.73   51.08
  -3   4   3 3110.22   66.25
   3   4  -2   14.04    3.66
   3  -4  -2   14.68   10.41
  -3  -4   2    8.89    9.16
  -3  -4   2   18.69    7.97
  -3   4   2   39.72    9.60
  -3   4   2    9.63    4.47
   3   4  -1 1595.43   20.45
   3   4  -1 1606.56   45.60
   3  -4  -1 1572.66   46.64
  -3  -4   1 1562.13   44.67
  -3   4   1 1603.01   44.36
  -3   4   1 1554.20   23.30
   3   4   0   78.71   12.70
   3  -4   0   81.53   12.82
  -3   4   0  104.10   14.09
  -3   4   0   83.13    3.67
  -3  -4   0   71.68   11.25
   3   4   1 1072.44   38.15
   3  -4   1 1099.33   38.19
  -3  -4  -1 1129.85   38.24
  -3   4  -1 1094.72   36.84
  -3   4  -1 1105.30   14.54
   3   4   2  296.98   21.61
   3  -4   2  292.11   20.33
   3  -4   2  275.18    7.34
  -3  -4  -2  291.92   18.02
  -3   4  -2  277.39   19.23
   3   4   3  481.32   28.49
   3  -4   3  506.66   13.01
   3  -4   3  468.07   28.70
  -3  -4  -3  507.02   24.66
  -3  -4  -3  492.47   10.74
  -3   4  -3  532.66   29.35
   3   4   4  159.86   23.40
   3  -4   4  166.99    8.71
   3  -4   4  166.99   17.63
  -3  -4  -4  197.38   16.94
  -3  -4  -4  185.63    8.77
  -3   4  -4  188.38   22.31
   3   4   5   61.08   20.73
   3  -4   5   44.33   15.87
   3  -4   5   60.33    7.40
  -3  -4  -5   70.85   12.90
  -3  -4  -5   52.28    7.92
  -3   4  -5   56.47   16.40
   3   4   6   -0.92   13.01
   3  -4   6    3.08    9.70
  -3  -4  -6   -2.45    5.77
  -3  -4  -6   16.60    9.33
  -3   4  -6   11.52   13.02
   3   4   7   96.74   26.44
   3  -4   7   68.87   11.41
   3  -4   7   74.81   18.47
  -3  -4  -7   81.55   17.74
  -3   4  -7  107.45   21.97
  -3  -4  -7   94.87   12.27
   3   4   8   42.30   20.16
   3  -4   8   58.04   16.71
   3  -4   8   32.02   11.76
  -3  -4  -8   23.41   15.24
  -3  -4  -8   19.55   11.46
  -3   4  -8   62.25   23.63
   3   4   9   95.15   26.00
   3  -4   9  100.99   20.31
   3  -4   9  100.68   17.21
  -3  -4  -9  111.77   16.80
  -3  -4  -9  142.12   20.51
  -3   4  -9   75.87   27.92
   3   4  10   27.77   22.28
   3  -4  10   38.48   16.69
   3  -4  10   54.80   16.53
  -3  -4 -10   51.42   17.65
  -3  -4 -10   48.19   18.22
  -3   4 -10   63.75   26.48
   3   4  11   66.30   31.24
   3  -4  11   84.16   19.68
   3  -4  11   68.69   19.45
  -3  -4 -11   84.03   20.47
  -3  -4 -11   58.11   21.18
  -3   4 -11  137.29   26.11
   3  -4  12  300.31   30.70
   3  -4  12  311.21   32.57
   3   4  12  324.20   48.47
  -3  -4 -12  285.11   30.94
  -3  -4 -12  370.13   34.02
  -3   4 -12  345.37   39.21
   3  -4  13  100.75   27.52
   3   4  13  137.61   41.38
  -3  -4 -13  115.02   28.30
  -3  -4 -13  114.26   23.23
  -3   4 -13  125.72   32.14
   3   4  14  122.65   42.15
   3  -4  14  126.41   29.85
  -3  -4 -14  105.49   30.89
  -3   4 -14   86.17   40.49
   3   4  15  -17.00   30.87
  -3   4 -15    3.53   30.97
   3  -5 -17  129.59   41.70
   3   5 -17  110.55   38.86
  -3  -5  17  160.87   39.76
  -3   5  17  120.33   43.51
   3   5 -16   94.11   37.75
   3  -5 -16   62.85   34.90
  -3  -5  16   76.63   31.67
  -3   5  16   93.97   36.88
   3   5 -15  136.80   39.89
   3  -5 -15   84.16   34.89
  -3  -5  15  142.80   28.43
  -3   5  15  161.54   32.51
   3   5 -14   22.02   29.32
   3  -5 -14   60.84   25.91
  -3   5  14   46.26   22.34
   3   5 -13  132.07   25.95
   3  -5 -13  115.86   24.92
  -3  -5  13   81.07   27.23
  -3   5  13   88.00   25.73
   3   5 -12   43.69   20.52
   3  -5 -12   46.74   22.96
   3  -5 -12   77.33   12.29
  -3  -5  12   20.68   21.26
  -3   5  12   -4.93   20.72
   3  -5 -11  -16.24   13.48
   3   5 -11   -1.85   14.68
  -3  -5  11   -4.02   10.14
  -3   5  11   18.99   12.00
   3   5 -10  196.56   29.80
   3  -5 -10  235.26   29.41
   3  -5 -10  223.25   20.02
  -3  -5  10  201.00   24.09
  -3  -5  10  197.03   12.82
  -3   5  10  310.52   28.02
   3  -5  -9  389.70   33.35
   3  -5  -9  369.09   28.04
   3   5  -9  317.21   28.23
  -3  -5   9  343.59   31.44
  -3  -5   9  355.42   18.03
  -3   5   9  400.79   29.72
   3   5  -8  159.27   23.53
   3  -5  -8  167.52   22.28
  -3  -5   8  150.67   13.60
  -3  -5   8  151.93   22.62
  -3   5   8  143.55   23.53
  -3   5   8  122.89   21.81
   3   5  -7  518.09   31.46
   3  -5  -7  559.95   35.04
  -3  -5   7  566.25   31.12
  -3   5   7  585.61   33.98
  -3   5   7  532.80   31.89
  -3  -5   7  550.79   24.41
   3   5  -6  123.86   14.29
   3  -5  -6  103.96   23.83
  -3  -5   6  131.86   14.71
  -3  -5   6  145.66   19.36
  -3   5   6  142.24   17.12
  -3   5   6  156.42   18.67
   3   5  -5    4.99    8.96
  -3  -5   5   11.86   11.63
  -3  -5   5   13.91    9.36
  -3   5   5   21.37   10.84
  -3   5   5   -2.69    9.83
   3   5  -4   22.95    8.13
   3  -5  -4   20.29   12.62
  -3  -5   4   -4.67    9.27
  -3  -5   4    7.93    9.59
  -3   5   4    9.97   10.64
  -3   5   4   10.39    8.28
   3   5  -3   33.87    6.30
   3  -5  -3   33.17   16.51
  -3  -5   3   49.80   13.65
  -3  -5   3   30.04    9.62
  -3   5   3   20.20   12.39
  -3   5   3   43.49    8.29
   3   5  -2  175.84   16.80
   3   5  -2  148.37    7.62
   3  -5  -2  168.22   20.26
  -3  -5   2  160.58   15.18
  -3   5   2  153.25   14.16
  -3   5   2  156.79    9.59
   3   5  -1   15.91    2.88
   3   5  -1   23.96   11.16
   3  -5  -1    4.94   15.23
  -3  -5   1   34.95   10.32
  -3   5   1   20.58    5.16
  -3   5   1   26.19    9.33
   3   5   0  310.28   24.16
   3  -5   0  300.26   27.48
  -3  -5   0  299.66   22.91
  -3   5   0  310.60   10.22
  -3   5   0  307.40   22.19
   3   5   1   55.37   17.13
   3  -5   1   34.56   15.39
  -3  -5  -1   57.73   13.86
  -3   5  -1   72.87    5.28
  -3   5  -1   66.75   12.20
   3   5   2  501.08   33.90
   3  -5   2  545.16   30.93
  -3  -5  -2  531.31   29.99
  -3   5  -2  542.41   13.89
  -3   5  -2  558.56   29.40
   3   5   3   83.64   16.87
   3  -5   3   76.91   16.18
   3  -5   3   73.79    6.28
  -3  -5  -3  105.41   14.32
  -3   5  -3  105.77   15.99
   3   5   4   53.91   16.62
   3  -5   4   39.20   15.01
   3  -5   4   36.55    6.34
  -3  -5  -4   36.11    3.65
  -3  -5  -4   67.44   12.92
  -3   5  -4   62.87   15.19
   3   5   5  328.65   34.89
   3  -5   5  337.78   26.30
   3  -5   5  348.32   14.71
  -3  -5  -5  317.02   12.07
  -3  -5  -5  341.36   24.56
  -3   5  -5  338.65   27.73
   3   5   6   23.18   19.72
   3  -5   6   34.12   16.58
   3  -5   6   23.11    6.99
  -3  -5  -6   10.37   12.35
  -3  -5  -6   21.30    6.13
  -3   5  -6   -9.13   15.63
   3   5   7   49.57   19.95
   3  -5   7   42.76   18.11
   3  -5   7   23.21    8.97
  -3  -5  -7   18.49   16.05
  -3  -5  -7   33.28    8.84
  -3   5  -7   38.91   18.46
   3   5   8   23.64   22.70
   3  -5   8    4.69   10.30
   3  -5   8   21.73   16.66
  -3  -5  -8   10.41   15.08
  -3  -5  -8    1.95   10.04
  -3   5  -8   72.58   21.89
   3   5   9   34.93   28.95
   3  -5   9   41.44   14.03
   3  -5   9   52.07   20.05
  -3  -5  -9   49.33   14.24
  -3  -5  -9   41.53   18.59
  -3   5  -9   99.47   22.57
   3   5  10   -6.74   18.91
   3  -5  10  -10.36   12.17
   3  -5  10   -2.46   15.18
  -3  -5 -10   24.30   10.64
  -3  -5 -10   12.22   14.55
  -3   5 -10   -5.26   21.55
   3   5  11  262.15   43.55
   3  -5  11  207.93   28.60
   3  -5  11  256.50   26.70
  -3  -5 -11  237.16   26.82
  -3  -5 -11  268.85   30.20
  -3   5 -11  249.65   35.57
   3   5  12   25.61   24.37
   3  -5  12   -6.45   17.94
   3  -5  12   38.87   17.43
  -3  -5 -12   -5.22   17.74
  -3  -5 -12   31.20   18.84
  -3   5 -12   34.41   26.97
   3   5  13  269.61   48.95
   3  -5  13  167.10   30.07
  -3  -5 -13  191.87   30.87
  -3   5 -13  283.01   46.54
   3   5  14   23.99   28.02
  -3   5 -14  -16.74   26.41
   3   5  15  255.64   52.73
  -3   5 -15  125.11   49.47
   3   6 -17    2.97   30.68
   3  -6 -17  -14.21   27.37
  -3  -6  17   23.50   26.31
  -3   6  17    8.97   30.43
   3   6 -16  189.75   45.02
   3  -6 -16  144.17   40.01
  -3  -6  16  122.82   38.15
  -3   6  16  138.00   44.59
   3   6 -15   -7.94   26.39
   3  -6 -15    0.14   19.26
  -3  -6  15  -16.84   19.05
  -3   6  15   -6.33   26.66
   3   6 -14  104.22   37.15
   3  -6 -14  133.47   34.79
  -3  -6  14  156.39   32.29
  -3   6  14  110.19   37.47
   3   6 -13  -15.93   21.99
   3  -6 -13   -3.73   11.41
   3  -6 -13   -5.45   19.55
  -3  -6  13  -14.27   18.40
  -3   6  13   24.54   23.57
   3   6 -12  131.13   26.48
   3  -6 -12  129.90   23.87
   3  -6 -12  103.40   17.07
  -3  -6  12  135.61   22.77
  -3   6  12  101.93   30.42
   3   6 -11   28.20   21.46
   3  -6 -11   34.42   19.82
   3  -6 -11   15.18   13.32
  -3  -6  11   28.02   19.38
  -3   6  11   25.18   22.56
   3   6 -10   63.00   20.09
   3  -6 -10   84.47   22.36
   3  -6 -10   74.55   17.00
  -3  -6  10   66.33   18.09
  -3  -6  10   60.46   12.08
  -3   6  10   57.92   20.77
   3   6  -9  235.27   25.45
   3  -6  -9  250.49   28.25
  -3  -6   9  253.79   28.47
  -3  -6   9  225.31   18.54
  -3   6   9  249.81   32.11
   3   6  -8  109.32   22.19
   3  -6  -8  135.98   21.45
  -3  -6   8   93.39   22.37
  -3  -6   8  119.18   18.18
  -3   6   8  134.78   22.51
  -3   6   8  159.84   24.41
   3   6  -7    9.74   15.01
   3  -6  -7   30.26   19.52
  -3  -6   7   12.15   12.99
  -3  -6   7   22.18   13.17
  -3   6   7   35.57   16.24
  -3   6   7   29.84   12.33
   3   6  -6   37.19   14.06
   3  -6  -6   33.88   17.51
  -3  -6   6   21.69   13.44
  -3  -6   6   28.27   12.39
  -3   6   6   69.15   15.81
  -3   6   6    9.96   13.91
   3   6  -5   13.63   10.15
   3  -6  -5   15.88   18.64
  -3  -6   5   -0.31    9.98
  -3  -6   5    5.62   10.35
  -3   6   5    4.42    8.91
  -3   6   5   19.83   11.32
   3   6  -4   11.53    7.94
   3  -6  -4   41.99   18.24
  -3  -6   4    2.65   13.43
  -3  -6   4   -1.63    9.75
  -3   6   4   -0.49    9.26
  -3   6   4    9.67   10.53
   3   6  -3    8.54    9.96
   3   6  -3   -1.25    4.95
   3  -6  -3  -15.69   16.49
  -3  -6   3    5.42   11.08
  -3   6   3   14.05    7.59
  -3   6   3    3.18   10.58
   3   6  -2   15.02    5.45
   3   6  -2   26.57   15.22
   3  -6  -2    7.51   14.86
  -3  -6   2   34.47   12.11
  -3   6   2   22.69    7.18
  -3   6   2   21.43   10.16
   3   6  -1   43.07    3.64
   3   6  -1   35.10   13.74
   3  -6  -1   47.65   16.84
  -3  -6   1   65.63   14.01
  -3   6   1   49.24   14.08
  -3   6   1   26.84    7.48
   3   6   0   26.54   14.33
   3  -6   0    2.11   19.11
  -3  -6   0   33.48   12.77
  -3   6   0   29.65    6.24
  -3   6   0   32.34   11.27
   3   6   1  235.36   25.77
   3  -6   1  238.50   24.30
  -3  -6  -1  193.03   24.09
  -3   6  -1  190.08   19.92
  -3   6  -1  201.29    9.48
   3   6   2  220.83   28.38
   3  -6   2  186.66   29.32
  -3  -6  -2  224.38   22.16
  -3   6  -2  228.24   24.47
  -3   6  -2  226.25   10.87
   3   6   3   11.65   15.26
   3  -6   3    6.08   14.01
  -3  -6  -3    4.63   13.77
  -3   6  -3   -0.69   11.52
   3   6   4  240.44   26.27
   3  -6   4  181.75   10.37
   3  -6   4  157.05   27.92
  -3  -6  -4  194.74   24.79
  -3   6  -4  201.13   23.23
   3   6   5   32.00   16.86
   3  -6   5    9.33    6.01
   3  -6   5   -3.75   14.86
  -3  -6  -5   24.73   12.54
  -3   6  -5   27.04   15.28
   3   6   6  187.76   28.44
   3  -6   6  144.09   27.49
   3  -6   6  168.31   13.50
  -3  -6  -6  166.72   22.07
  -3   6  -6  189.37   25.24
   3   6   7   21.59   20.69
   3  -6   7    0.94   16.04
   3  -6   7    2.51    7.87
  -3  -6  -7   10.26   14.33
  -3   6  -7   -4.79   15.15
   3   6   8  301.93   38.92
   3  -6   8  248.91   18.47
   3  -6   8  206.14   29.62
  -3  -6  -8  251.38   29.01
  -3   6  -8  276.35   36.60
   3   6   9   67.19   30.19
   3  -6   9   22.47   11.54
   3  -6   9   59.08   21.08
  -3  -6  -9   58.67   20.72
  -3   6  -9   62.90   24.34
   3   6  10  350.59   40.96
   3  -6  10  275.25   24.75
   3  -6  10  287.57   33.82
  -3  -6 -10  298.14   28.57
  -3   6 -10  246.39   36.64
   3   6  11   31.56   30.05
   3  -6  11   19.83   13.00
  -3  -6 -11    0.71   19.07
  -3   6 -11   16.51   27.05
   3   6  12  138.83   36.38
   3  -6  12  118.64   24.84
   3  -6  12  150.13   30.61
  -3  -6 -12  182.99   30.47
  -3   6 -12  193.52   36.52
   3   6  13   47.62   31.26
  -3  -6 -13   56.14   24.44
  -3   6 -13    3.73   28.05
   3   6  14  151.22   50.02
  -3   6 -14  128.97   38.72
   3  -7 -16   40.56   32.61
   3   7 -16   29.56   29.34
  -3  -7  16   17.86   30.70
  -3   7  16   72.90   37.12
   3   7 -15  136.16   36.12
   3  -7 -15  181.19   33.59
  -3  -7  15  133.56   31.96
  -3   7  15  251.88   44.67
   3   7 -14   -6.70   30.21
   3  -7 -14   24.54   27.07
  -3   7  14   98.41   35.29
  -3  -7  14   67.12   27.40
   3   7 -13  103.91   29.22
   3  -7 -13   54.88   18.55
   3  -7 -13   42.13   23.76
  -3   7  13   99.18   35.07
  -3  -7  13  127.36   25.08
   3   7 -12   54.19   25.14
   3  -7 -12   25.10   21.97
   3  -7 -12    2.30   17.01
  -3  -7  12   66.03   22.54
  -3   7  12   -7.72   21.59
   3   7 -11   60.80   25.19
   3  -7 -11   36.85   19.21
   3  -7 -11   45.80   17.63
  -3  -7  11   37.20   12.84
  -3  -7  11   47.62   21.94
  -3   7  11   21.86   22.59
   3  -7 -10   66.35   20.05
   3  -7 -10   69.71   24.21
   3   7 -10   87.65   26.47
  -3  -7  10   84.51   15.89
  -3  -7  10   89.90   24.10
  -3   7  10  126.98   29.39
   3  -7  -9   23.47   19.24
   3   7  -9   10.14   18.85
  -3  -7   9   34.97   13.05
  -3  -7   9   -0.93   14.93
  -3   7   9   16.79   16.94
  -3   7   9   25.17   18.43
   3   7  -8   32.26   16.73
   3  -7  -8   71.94   24.79
  -3  -7   8   67.22   18.13
  -3  -7   8   57.22   17.83
  -3   7   8   40.63   19.06
  -3   7   8   96.72   22.54
   3   7  -7   38.42   16.08
   3  -7  -7    5.98   23.01
  -3  -7   7  -10.19   17.39
  -3  -7   7   16.82   15.86
  -3   7   7   46.88   15.86
  -3   7   7   31.30   18.30
   3   7  -6   22.77   13.15
   3  -7  -6   -3.92   23.97
  -3  -7   6  -10.49   12.22
  -3   7   6   18.45   16.14
  -3   7   6   24.73   11.00
  -3  -7   6   46.28   17.31
   3   7  -5   61.66   14.49
   3  -7  -5   84.08   28.12
  -3  -7   5   77.45   17.30
  -3  -7   5   61.23   19.64
  -3   7   5   70.24   17.05
  -3   7   5   63.88   18.08
   3   7  -4   98.38   12.49
   3  -7  -4   65.33   23.44
  -3  -7   4   97.84   20.69
  -3  -7   4   29.98   11.99
  -3   7   4   77.90   14.46
  -3   7   4   49.86   16.36
   3   7  -3    2.98    6.22
   3   7  -3    3.41   16.00
   3  -7  -3   -4.42   21.43
  -3  -7   3   34.08   12.18
  -3   7   3   -5.33   12.08
  -3   7   3   19.09   10.55
   3   7  -2   89.27    7.14
   3   7  -2  125.32   19.14
   3  -7  -2   60.85   23.33
  -3  -7   2   83.53   21.55
  -3   7   2   72.72   12.08
  -3   7   2  102.30   17.64
   3   7  -1   42.34   19.37
   3   7  -1   42.88    4.61
   3  -7  -1   49.25   20.11
  -3  -7   1   26.61   18.13
  -3   7   1   53.03    8.61
  -3   7   1   51.29   13.76
   3  -7   0   55.35   22.02
   3   7   0   69.13   18.50
  -3  -7   0   88.92   21.26
  -3   7   0   41.67    7.88
  -3   7   0   56.89   16.85
   3   7   1  173.53   23.16
   3  -7   1  135.18   31.06
  -3  -7  -1  221.56   26.30
  -3   7  -1  159.83   19.66
  -3   7  -1  142.98   11.61
   3   7   2  119.46   24.07
   3  -7   2   70.99   22.35
  -3  -7  -2   92.13   19.32
  -3   7  -2   57.64   15.96
  -3   7  -2   46.47    7.83
   3   7   3   53.04   24.54
   3  -7   3   63.71   27.02
  -3  -7  -3   68.22   18.49
  -3   7  -3  115.54   22.62
  -3   7  -3   67.88    8.55
   3   7   4   19.63   24.70
   3  -7   4   65.19   25.97
  -3  -7  -4   62.29   17.00
  -3   7  -4   29.85   17.06
   3   7   5   95.12   30.06
   3  -7   5   96.54   28.87
   3  -7   5  104.38   10.70
  -3  -7  -5  152.75   25.48
  -3   7  -5  122.96   22.00
   3   7   6   72.63   25.08
   3  -7   6   80.99   27.16
   3  -7   6   96.15   10.80
  -3  -7  -6   65.52   23.45
  -3   7  -6   92.85   27.13
   3   7   7  174.04   29.58
   3  -7   7  154.83   15.32
   3  -7   7  165.82   26.14
  -3  -7  -7  176.76   27.42
  -3   7  -7  173.78   27.28
   3  -7   8  134.58   28.87
   3  -7   8  118.43   14.72
   3   7   8  143.91   30.57
  -3  -7  -8  104.02   25.65
  -3   7  -8  103.81   31.92
   3   7   9  258.04   36.19
   3  -7   9  209.46   19.74
   3  -7   9  228.86   35.88
  -3  -7  -9  241.56   33.61
  -3   7  -9  259.99   34.85
   3   7  10   -1.12   30.11
  -3  -7 -10   50.79   21.81
  -3   7 -10   13.71   23.93
   3   7  11  147.67   38.24
   3  -7  11  167.33   32.12
  -3  -7 -11  101.05   24.06
  -3   7 -11  174.93   35.04
   3   7  12   36.30   31.15
  -3  -7 -12   10.99   21.84
  -3   7 -12  -12.21   28.66
   3   7  13  145.25   47.57
  -3  -7 -13  102.91   31.50
  -3   7 -13   73.95   43.29
  -3   7 -14   44.67   41.49
   3   8 -15   -0.29   37.26
   3  -8 -15  124.46   34.22
  -3  -8  15   20.63   27.36
  -3   8  15  101.28   33.38
   3   8 -14   72.54   37.12
   3  -8 -14  106.03   32.39
  -3  -8  14   55.36   27.14
  -3   8  14   94.95   33.14
   3   8 -13  188.15   40.35
   3  -8 -13  166.41   34.76
   3  -8 -13  159.71   28.69
  -3  -8  13  134.83   27.74
  -3   8  13  150.57   43.10
   3  -8 -12   26.78   23.94
   3  -8 -12   58.73   25.14
   3   8 -12  100.06   31.26
  -3  -8  12   80.01   26.90
  -3   8  12  100.08   32.67
   3   8 -11  125.69   31.07
   3  -8 -11   95.74   27.98
   3  -8 -11  110.99   28.50
  -3  -8  11  138.90   28.66
  -3   8  11   55.80   27.62
   3   8 -10   63.82   24.91
   3  -8 -10   37.86   19.74
   3  -8 -10   23.98   18.49
  -3  -8  10   72.65   18.77
  -3  -8  10   12.32   21.98
  -3   8  10   33.10   27.09
   3   8  -9  103.65   27.99
   3  -8  -9  201.72   32.33
  -3  -8   9  168.74   25.70
  -3  -8   9  169.01   27.88
  -3   8   9  189.72   26.10
  -3   8   9  181.22   28.97
   3   8  -8   14.11   18.51
   3  -8  -8   33.90   24.65
  -3  -8   8   19.82   18.01
  -3  -8   8   47.91   19.87
  -3   8   8   41.14   17.58
  -3   8   8   29.41   22.15
   3   8  -7   20.08   15.95
   3  -8  -7   33.35   23.56
  -3  -8   7    0.85   17.35
  -3  -8   7   -5.03   17.84
  -3   8   7   33.60   18.69
  -3   8   7   15.05   14.93
   3   8  -6   -3.88   12.58
  -3  -8   6   19.91   17.22
  -3  -8   6  -13.71   16.08
  -3   8   6   23.69   13.06
  -3   8   6    1.06   15.12
   3   8  -5   64.53   13.69
   3  -8  -5   72.64   31.07
  -3  -8   5   70.68   24.26
  -3   8   5  104.37   19.53
  -3   8   5   79.60   19.79
   3   8  -4   -8.52    8.06
   3   8  -4   -4.52   14.91
   3  -8  -4   14.50   20.65
  -3  -8   4   -3.88   14.25
  -3   8   4   -2.35    8.84
  -3   8   4   11.63   11.75
   3   8  -3  269.54   27.64
   3   8  -3  230.94   14.16
   3  -8  -3  300.04   40.39
  -3  -8   3  229.05   30.49
  -3   8   3  227.52   24.75
  -3   8   3  214.10   22.57
   3   8  -2   17.15    5.39
   3   8  -2   32.64   15.29
   3  -8  -2   -0.32   21.36
  -3  -8   2   -5.19   15.02
  -3   8   2   16.10   14.56
  -3   8   2    4.78   10.37
   3   8  -1  220.21   26.54
   3  -8  -1  213.75   38.35
  -3   8   1  198.89   17.32
  -3   8   1  282.75   27.26
  -3  -8   1  231.98   31.07
   3   8   0  159.80   23.36
   3  -8   0  121.03   33.30
  -3  -8   0  103.83   21.61
  -3   8   0   83.90   11.89
  -3   8   0   81.84   21.69
   3   8   1  411.15   39.18
   3  -8   1  398.83   45.18
  -3   8  -1  434.75   20.13
  -3   8  -1  447.12   34.34
  -3  -8  -1  466.28   35.28
   3   8   2   37.63   18.03
   3  -8   2   42.91   21.10
  -3  -8  -2   44.83   20.93
  -3   8  -2   17.15    7.67
  -3   8  -2   29.42   19.08
   3   8   3  176.22   27.42
   3  -8   3  198.39   39.20
  -3  -8  -3  241.80   31.74
  -3   8  -3  223.18   29.89
  -3   8  -3  226.95   14.54
   3   8   4   76.79   27.18
   3  -8   4   56.18   29.54
  -3  -8  -4   50.98   19.67
  -3   8  -4   66.19   20.59
  -3   8  -4   75.17   10.37
   3   8   5   90.70   24.87
   3  -8   5  137.59   25.54
  -3   8  -5   69.81   22.84
  -3  -8  -5  112.74   26.30
   3   8   6  178.81   36.15
   3  -8   6  183.38   15.06
   3  -8   6  133.79   34.50
  -3  -8  -6  206.34   29.59
  -3   8  -6  196.04   33.52
   3   8   7   94.47   34.74
   3  -8   7   77.67   30.08
  -3   8  -7  136.06   25.43
  -3  -8  -7   91.08   22.36
   3   8   8   32.33   34.02
   3  -8   8   79.70   29.03
  -3  -8  -8   69.65   22.36
  -3   8  -8  112.61   31.15
   3   8   9   31.47   27.00
   3  -8   9   58.28   28.59
  -3  -8  -9   45.64   20.65
  -3   8  -9   51.65   25.85
   3   8  10   60.34   38.29
   3  -8  10   81.86   29.92
  -3  -8 -10   43.36   22.93
  -3   8 -10   95.61   28.94
   3   8  11   20.97   27.83
   3  -8  11   62.27   26.05
  -3  -8 -11    6.54   24.81
  -3   8 -11   15.99   26.67
   3   8  12  -22.21   24.49
  -3  -8 -12    7.34   20.23
  -3   8 -12    6.95   28.48
   3   8  13   -4.08   32.64
  -3   8 -13   12.86   26.32
   3   9 -14   75.50   31.76
  -3  -9  14   20.77   34.40
  -3   9  14  133.41   41.70
   3  -9 -13   37.42   29.42
   3   9 -13   85.03   35.30
  -3  -9  13   86.81   30.97
  -3   9  13   53.44   37.10
   3   9 -12   90.25   33.55
   3  -9 -12  100.23   28.82
   3  -9 -12   62.26   29.84
  -3  -9  12  149.48   32.36
  -3   9  12   61.45   31.63
   3  -9 -11   54.92   25.69
   3  -9 -11   62.42   23.94
   3   9 -11   87.94   24.02
  -3  -9  11   53.52   27.00
  -3   9  11   67.97   33.94
   3   9 -10   85.14   30.33
   3  -9 -10  220.46   35.86
   3  -9 -10  127.92   29.30
  -3  -9  10  114.01   27.31
  -3  -9  10  111.88   25.28
  -3   9  10  151.36   37.07
   3   9  -9   79.60   20.82
   3  -9  -9   86.19   31.08
  -3  -9   9  112.69   28.06
  -3  -9   9   64.93   24.45
  -3   9   9   61.80   22.69
  -3   9   9   98.91   29.64
   3   9  -8  183.37   26.84
   3  -9  -8  105.16   30.12
  -3  -9   8  179.49   29.77
  -3  -9   8  183.37   29.73
  -3   9   8  189.31   27.20
  -3   9   8  143.26   32.50
   3   9  -7   42.82   18.10
   3  -9  -7   34.54   29.26
  -3  -9   7   37.09   20.04
  -3   9   7   22.45   21.65
  -3   9   7   46.77   19.80
  -3  -9   7   56.58   23.44
   3   9  -6  322.89   25.84
   3  -9  -6  285.49   42.92
  -3  -9   6  295.59   30.52
  -3   9   6  292.84   32.13
  -3   9   6  236.27   27.78
   3   9  -5   20.58   12.39
   3  -9  -5    7.19   28.81
  -3  -9   5    8.60   20.61
  -3   9   5   27.92   15.72
  -3   9   5   11.01   17.56
   3   9  -4  393.46   38.78
   3   9  -4  368.53   21.45
   3  -9  -4  365.27   48.59
  -3  -9   4  358.35   37.17
  -3   9   4  343.73   29.49
  -3   9   4  337.03   29.86
   3   9  -3  -15.51   17.12
   3  -9  -3   -8.93   17.98
   3   9  -3   -1.83    6.31
  -3  -9   3   16.90   16.91
  -3   9   3   -0.21   11.88
  -3   9   3  -12.50   12.28
   3   9  -2  232.44   29.73
   3  -9  -2  285.88   46.35
  -3  -9   2  243.24   34.85
  -3   9   2  328.43   27.93
   3   9  -1   -4.10   20.90
   3  -9  -1   -3.06   26.64
  -3  -9   1   -5.66   15.78
  -3   9   1   12.65   15.33
  -3   9   1   15.41    8.92
   3   9   0  339.65   38.61
   3  -9   0  358.85   47.25
  -3  -9   0  272.49   31.79
  -3   9   0  365.97   28.79
  -3   9   0  317.97   20.03
   3  -9   1  135.69   32.25
   3   9   1   41.25   21.33
  -3  -9  -1   90.25   24.26
  -3   9  -1   37.23   10.35
  -3   9  -1   26.65   16.06
   3   9   2  776.17   53.58
   3  -9   2  836.32   64.18
  -3  -9  -2  777.98   53.81
  -3   9  -2  756.03   29.01
  -3   9  -2  756.96   48.10
   3   9   3  -13.03   17.45
   3  -9   3   10.03   21.48
  -3  -9  -3   12.62   20.65
  -3   9  -3   43.09   18.87
   3   9   4  221.64   32.49
   3  -9   4  138.03   41.10
  -3  -9  -4  247.55   30.77
  -3   9  -4  188.97   28.00
   3  -9   5   12.12   26.88
   3   9   5  -20.89   24.94
  -3  -9  -5   54.55   23.20
  -3   9  -5   27.31   18.16
   3   9   6  251.86   41.35
   3  -9   6  122.81   41.65
  -3  -9  -6  235.84   31.43
  -3   9  -6  239.94   37.10
   3   9   7   17.80   16.55
   3  -9   7   -7.08   15.93
  -3  -9  -7   -9.61   16.85
   3   9   8  185.46   36.73
   3  -9   8  101.01   32.67
  -3  -9  -8  138.07   29.44
  -3   9  -8  181.04   39.01
   3   9   9   95.76   31.43
   3  -9   9    5.87   27.23
  -3  -9  -9  -13.12   19.49
  -3   9  -9   14.49   22.21
   3   9  10   75.10   37.53
   3  -9  10   91.28   34.02
  -3  -9 -10  162.90   30.08
  -3   9 -10  103.69   33.51
   3   9  11   -0.35   33.18
   3  -9  11   96.03   35.14
  -3  -9 -11   53.42   24.82
  -3   9 -11   54.35   30.45
   3   9  12   26.93   34.99
  -3  -9 -12   -9.73   23.97
  -3   9 -12  -20.27   29.81
   3  10 -13   61.67   37.20
  -3 -10  13   86.11   34.97
  -3  10  13   42.55   41.57
   3  10 -12   18.24   30.43
   3 -10 -12   19.11   28.61
  -3 -10  12   36.59   29.16
  -3  10  12   43.39   28.08
   3 -10 -11   85.52   29.30
   3 -10 -11   68.85   35.24
   3  10 -11   74.08   27.43
  -3 -10  11  141.22   33.73
  -3  10  11  150.21   40.24
   3  10 -10   91.38   27.52
   3 -10 -10   15.83   24.67
   3 -10 -10   73.46   32.84
  -3 -10  10   51.86   24.31
  -3 -10  10   52.04   24.94
  -3  10  10   64.20   32.49
   3  10  -9  255.19   33.95
   3 -10  -9  188.17   36.58
  -3 -10   9  206.22   39.42
  -3 -10   9  227.16   34.64
  -3  10   9  126.80   37.69
  -3  10   9  198.89   30.59
   3  10  -8   64.78   23.81
   3 -10  -8   70.94   36.31
  -3 -10   8   57.37   25.46
  -3 -10   8   50.83   27.28
  -3  10   8   99.44   24.66
  -3  10   8   79.26   22.83
   3  10  -7  164.48   28.32
   3  10  -7  307.00   38.94
   3 -10  -7  228.36   44.82
  -3 -10   7  270.12   37.00
  -3  10   7  234.79   35.04
  -3  10   7  266.82   29.66
   3  10  -6   32.62   17.02
   3  10  -6   14.18   26.41
   3 -10  -6   69.23   32.55
  -3 -10   6   32.77   26.56
  -3  10   6   53.71   19.24
  -3  10   6   50.69   23.07
   3  10  -5  281.29   40.29
   3 -10  -5  322.49   44.52
   3  10  -5  295.10   22.80
  -3 -10   5  258.13   33.92
  -3  10   5  304.86   32.92
  -3  10   5  340.65   30.59
   3 -10  -4   84.19   37.82
   3  10  -4   43.15   24.09
  -3 -10   4   82.26   23.95
  -3  10   4  106.20   20.69
  -3  10   4   72.83   21.35
   3  10  -3  126.23   25.21
   3 -10  -3  111.47   30.61
  -3 -10   3   70.79   24.20
  -3  10   3   79.33   20.16
  -3  10   3   63.76   20.72
   3 -10  -2   77.36   26.78
   3  10  -2   50.70   22.58
  -3 -10   2   18.36   20.86
  -3  10   2   12.76   15.03
  -3  10   2   39.27   15.84
   3 -10  -1  119.66   31.86
   3  10  -1   64.02   31.01
  -3 -10   1  118.97   29.73
  -3  10   1   85.41   15.52
  -3  10   1   56.29   22.49
   3  10   0   19.86   21.48
   3 -10   0  -16.10   22.08
  -3 -10   0   10.78   17.06
  -3  10   0   -8.97    9.46
  -3  10   0   56.45   16.86
   3  10   1  327.60   42.87
   3 -10   1  255.40   51.27
  -3 -10  -1  285.00   39.28
  -3  10  -1  318.55   33.72
   3 -10   2  -12.25   29.94
   3  10   2   17.37   19.66
  -3 -10  -2   23.45   18.54
  -3  10  -2    7.69   19.97
   3  10   3  323.21   39.31
   3 -10   3  383.12   53.32
  -3 -10  -3  238.36   42.24
  -3  10  -3  354.97   40.10
   3  10   4   16.09   23.16
   3 -10   4   22.73   34.44
  -3 -10  -4   55.09   26.37
  -3  10  -4   33.69   20.06
   3  10   5   35.60   26.20
   3 -10   5  118.24   32.92
  -3 -10  -5   86.63   29.99
  -3  10  -5   41.04   27.62
   3  10   6  -28.82   23.78
   3 -10   6   19.59   25.53
  -3  10  -6  -16.84   20.67
  -3 -10  -6   11.83   17.54
   3  10   7   81.75   40.33
   3 -10   7  120.63   41.16
  -3 -10  -7  109.74   33.40
  -3  10  -7  106.06   35.20
   3  10   8   21.42   22.88
   3 -10   8   -6.61   28.45
  -3 -10  -8   -5.72   18.68
  -3  10  -8   15.73   25.35
   3  10   9   71.12   34.48
   3 -10   9   21.81   37.75
  -3 -10  -9   66.11   33.05
  -3  10  -9  102.96   37.31
   3  10  10  -10.72   34.30
   3 -10  10   24.17   33.27
  -3 -10 -10   27.17   27.29
  -3  10 -10    1.80   26.00
  -3 -10 -11   74.29   37.20
   3  11 -12   27.92   30.24
   3 -11 -12    9.00   25.89
  -3 -11  12   26.91   29.75
  -3  11  12  -14.69   34.93
   3  11 -11   -7.23   23.76
   3 -11 -11  -19.16   25.29
  -3 -11  11  -10.73   25.11
  -3  11  11   63.66   28.64
   3  11 -10   25.92   30.27
   3 -11 -10    8.46   30.51
  -3 -11  10   73.06   31.71
  -3 -11  10  131.06   27.86
  -3  11  10  -27.32   33.90
   3  11  -9    2.59   21.52
   3 -11  -9  -13.25   28.55
  -3 -11   9  -11.49   22.56
  -3 -11   9  -10.56   13.88
  -3  11   9    2.85   24.83
   3  11  -8   -6.74   18.59
   3 -11  -8    4.37   31.68
  -3 -11   8   18.76   25.47
  -3  11   8  102.86   27.29
  -3  11   8   19.99   21.39
   3  11  -7   38.32   28.59
   3  11  -7   37.72   16.72
   3 -11  -7    9.70   33.60
  -3 -11   7    9.65   26.35
  -3  11   7   63.43   26.36
  -3  11   7   24.08   21.17
   3  11  -6   27.79   30.85
   3 -11  -6  109.94   34.11
  -3 -11   6   19.57   29.50
  -3  11   6   86.66   22.34
  -3  11   6   45.78   26.94
   3  11  -5  -16.48   21.35
   3 -11  -5  -14.08   34.27
  -3 -11   5    1.08   21.62
  -3  11   5   43.76   18.20
  -3  11   5   51.87   21.26
   3  11  -4   -1.23   25.27
   3 -11  -4   -2.03   26.25
  -3 -11   4  -15.03   24.76
  -3  11   4   16.73   17.05
  -3  11   4   45.26   18.57
   3  11  -3  -20.09   21.58
   3 -11  -3    2.74   23.20
  -3 -11   3   34.78   22.44
  -3  11   3  -13.21   12.99
  -3  11   3   -4.32   15.10
   3  11  -2    0.03   18.92
   3 -11  -2   -5.70   25.06
  -3 -11   2   25.10   23.33
  -3  11   2   -0.85   16.80
  -3  11   2    6.03   14.44
   3  11  -1    7.58   20.43
   3 -11  -1   35.65   25.62
  -3 -11   1   -2.86   25.05
   3  11   0   86.60   34.70
   3 -11   0  146.50   44.66
  -3 -11   0   93.99   28.91
  -3  11   0  101.50   21.89
   3  11   1   10.83   30.37
   3 -11   1   43.37   32.53
  -3 -11  -1   99.46   28.77
  -3  11  -1   10.47   23.81
   3  11   2  192.03   39.34
   3 -11   2  157.56   37.72
  -3 -11  -2  148.16   35.93
  -3  11  -2  124.47   30.63
   3  11   3   -5.46   23.84
  -3 -11  -3    9.04   18.31
  -3  11  -3  -14.04   18.62
   3  11   4   91.04   30.72
   3 -11   4  110.39   44.46
  -3 -11  -4   57.43   29.07
  -3  11  -4   88.23   32.07
   3  11   5   96.67   35.07
   3 -11   5   60.63   33.09
  -3 -11  -5   43.54   31.30
  -3  11  -5   57.41   30.54
   3  11   6   -2.18   24.88
   3 -11   6   19.76   34.11
  -3 -11  -6   23.92   27.68
  -3  11  -6    9.29   22.17
   3  11   7  131.74   43.21
   3 -11   7  144.58   47.97
  -3 -11  -7   97.58   31.96
  -3  11  -7   58.48   38.06
   3  11   8   81.92   32.44
   3 -11   8   17.26   39.72
  -3 -11  -8   67.29   32.86
  -3  11  -8    8.14   27.44
   3  11   9  178.34   50.12
   3 -11   9  125.96   49.89
  -3 -11  -9  117.87   34.41
  -3  11  -9  103.97   43.81
   3  12 -10    1.36   27.98
   3 -12 -10   16.87   31.33
  -3  12  10  -31.38   29.16
   3  12  -9  -23.93   31.44
   3 -12  -9   68.09   29.05
  -3 -12   9   18.96   30.72
  -3  12   9   11.51   30.38
   3 -12  -8   22.35   34.43
  -3 -12   8    9.78   29.04
  -3  12   8    9.31   28.05
   3  12  -7  -12.51   23.90
   3 -12  -7  -12.57   35.68
  -3 -12   7   -8.24   27.62
  -3  12   7  -24.03   24.99
   3  12  -6   -0.51   28.00
   3 -12  -6    9.63   27.21
  -3 -12   6    9.67   27.97
  -3  12   6   28.92   25.12
   3  12  -5   -4.55   22.22
   3 -12  -5   -9.28   29.47
  -3 -12   5   31.23   23.27
  -3  12   5   43.08   19.23
  -3  12   5  -14.78   22.02
   3  12  -4    1.31   25.55
   3 -12  -4   -1.29   37.11
  -3 -12   4   10.45   30.89
  -3  12   4   88.74   22.01
   3  12  -3    8.62   25.92
   3 -12  -3  -19.22   29.66
  -3 -12   3  -31.02   26.02
  -3  12   3    7.89   17.61
   3  12  -2    4.05   19.14
   3 -12  -2  -19.14   23.83
  -3  12   2    0.88   16.74
   3  12  -1   16.21   25.40
   3 -12  -1  -28.66   33.10
  -3 -12   1   30.13   26.51
  -3  12   1    0.02   19.43
   3  12   0   67.71   24.73
   3 -12   0    5.68   29.10
  -3 -12   0   16.56   30.14
  -3  12   0   -5.20   21.51
   3  12   1    9.69   30.92
   3 -12   1   39.67   39.60
  -3 -12  -1   20.85   25.72
  -3  12  -1   63.76   26.07
   3  12   2   12.67   22.41
   3 -12   2    1.46   35.61
  -3 -12  -2    4.27   27.46
  -3  12  -2    8.48   22.32
   3  12   3   11.98   28.80
   3 -12   3   34.55   37.51
  -3 -12  -3   -4.54   28.24
  -3  12  -3   20.55   24.09
   3  12   4   67.10   34.52
   3 -12   4  -30.28   32.23
  -3 -12  -4   83.89   34.28
  -3  12  -4   53.99   28.26
   3  12   5  -18.66   30.19
   3 -12   5   34.41   38.21
  -3 -12  -5    8.10   29.06
  -3  12  -5   33.61   28.44
   3  12   6  138.93   39.69
   3 -12   6  112.70   49.20
  -3 -12  -6   98.93   40.96
  -3  12  -6  112.53   40.86
   3  12   7   -3.68   41.71
   3 -12   7   34.76   43.36
  -3 -12  -7   70.62   34.64
  -3  12  -7   15.55   27.76
   3  13  -7   19.34   23.92
   3 -13  -7   12.43   34.93
  -3 -13   7  -13.79   31.03
   3  13  -6   54.53   32.01
   3 -13  -6   -5.03   37.68
  -3 -13   6   -5.26   28.47
   3  13  -5  -25.31   30.38
   3 -13  -5   -2.46   30.00
  -3 -13   5   -5.43   32.25
   3  13  -4   74.80   33.77
   3 -13  -4    9.13   32.94
  -3 -13   4    4.10   35.08
   3  13  -3    5.52   30.13
   3 -13  -3   -0.81   35.76
  -3 -13   3   32.77   32.88
   3  13  -2  -14.40   27.84
   3 -13  -2   89.70   41.30
  -3 -13   2   60.59   36.96
   3  13  -1  -13.48   19.58
   3 -13  -1   33.54   29.33
  -3 -13   1   20.34   24.53
  -3  13   1  -10.15   17.87
   3  13   0    3.67   33.56
   3 -13   0  120.54   37.03
  -3 -13   0  -13.58   34.18
  -3  13   0   23.69   25.05
   3  13   1   -7.36   31.04
   3 -13   1   23.12   32.71
  -3 -13  -1    3.95   26.61
  -3  13  -1   37.08   24.75
   3  13   2   28.49   31.42
   3 -13   2   78.86   38.35
  -3 -13  -2   47.44   37.47
  -3  13  -2   31.76   29.87
   3  13   3    2.21   26.98
   3 -13   3   10.43   25.84
  -3 -13  -3   -1.15   21.38
  -3  13  -3  -11.79   21.97
   3  13   4   12.71   37.76
   3 -13   4   18.24   44.22
  -3 -13  -4  100.78   37.01
  -3  13  -4   -0.35   24.99
   3  13   5   -0.42   30.38
   3 -13   5   33.86   34.87
  -3 -13  -5    5.06   34.66
  -3  13  -5   28.16   30.49
   4   0 -19    8.24   25.28
  -4   0  19  -19.66   27.69
   4   0 -18  128.56   40.35
  -4   0  18   29.79   34.05
   4   0 -17   11.61   25.04
  -4   0  17   31.67   28.13
   4   0 -16   63.38   34.37
  -4   0  16  112.54   30.46
   4   0 -15    1.94   20.30
  -4   0  15   21.05   18.60
   4   0 -14   16.20   20.68
  -4   0  14   56.54   23.77
   4   0 -13    1.97   17.40
  -4   0  13   35.64   19.77
   4   0 -12   79.86   22.73
  -4   0  12  105.75   24.09
   4   0 -11   24.17   17.46
  -4   0  11   45.24   19.26
   4   0 -10   32.30   15.32
  -4   0  10   13.74   17.06
   4   0  -9   -0.29   10.65
  -4   0   9    7.95   11.37
   4   0  -8  418.88   10.31
   4   0  -8  440.01   25.98
  -4   0   8  454.78   24.88
   4   0  -7    4.03    3.29
   4   0  -7    1.61    8.56
  -4   0   7   -6.49    8.50
   4   0  -6  592.96   16.01
  -4   0   6  592.06   23.86
   4   0  -5   -1.79    3.53
  -4   0   5   -2.98    6.05
  -4   0   5    4.10    6.24
  -4   0   4  567.32   23.41
  -4   0   4  566.46   20.06
  -4   0   4  567.56   18.38
  -4   0   3    1.19    5.00
  -4   0   3    4.47    5.49
  -4   0   2  392.05   15.89
  -4   0   2  382.21   14.02
  -4   0   2  394.02   15.89
   4   0  -1   12.26    4.55
  -4   0   1   -5.95    5.93
  -4   0   1   -0.58    6.74
   4   0   0 1875.60   35.13
  -4   0   0 1894.55   40.27
  -4   0   0 1752.59   42.76
   4   0   1    3.77    5.43
  -4   0  -1    7.12    6.56
   4   0   2  611.87   20.86
  -4   0  -2  594.66   23.20
  -4   0  -2  572.55   23.38
   4   0   3   -4.92    6.79
  -4   0  -3   -2.57    7.95
  -4   0  -3    1.14    7.83
   4   0   4  944.59   32.96
  -4   0  -4  919.73   33.00
  -4   0  -4  986.63   36.62
  -4   0  -5   -0.62    9.64
  -4   0  -5   39.01   11.23
   4   0   6  435.01   28.11
  -4   0  -6  514.95   31.35
  -4   0  -6  435.38   28.36
   4   0   7    2.15   12.08
  -4   0  -7    3.97    9.07
  -4   0  -7   -0.77   13.03
   4   0   8  104.36   20.61
  -4   0  -8   78.02   19.01
  -4   0  -8   73.04   17.85
   4   0   9   14.34   15.84
  -4   0  -9    5.39   13.09
  -4   0  -9   -1.96   13.31
   4   0  10  673.07   44.91
  -4   0 -10  763.64   40.88
  -4   0 -10  689.03   48.07
   4   0  11   64.88   22.80
  -4   0 -11    6.63   18.94
   4   0  12  348.01   32.32
   4   0  12  329.74   39.83
  -4   0 -12  354.37   36.65
   4   0  13   -4.51   20.44
   4   0  13   55.03   18.02
  -4   0 -13  -14.82   26.17
   4   0  14  149.29   38.96
  -4   0 -14  212.66   42.12
   4   0  15  -11.66   20.76
  -4   0 -15    6.75   27.59
   4   1 -19   61.55   33.39
   4  -1 -19   15.79   40.51
  -4  -1  19   60.42   36.47
  -4   1  19   58.92   29.37
   4   1 -18   84.04   32.08
   4  -1 -18   38.04   31.97
  -4  -1  18   80.87   28.15
  -4   1  18   58.90   29.56
   4   1 -17   50.91   35.53
   4  -1 -17   64.76   35.23
  -4  -1  17   16.67   30.95
  -4   1  17   87.38   27.86
   4   1 -16   90.36   34.81
   4  -1 -16   66.79   33.72
  -4  -1  16   82.21   31.04
  -4   1  16   57.01   26.32
   4   1 -15   80.61   26.06
   4  -1 -15   48.29   26.45
  -4  -1  15   78.22   27.37
  -4   1  15   45.10   23.83
   4  -1 -14   16.02   19.15
   4   1 -14   67.90   24.02
  -4  -1  14  -10.69   16.01
  -4   1  14    7.74   20.51
   4   1 -13    0.84   18.25
   4  -1 -13   49.87   23.34
  -4  -1  13   12.03   16.47
  -4   1  13   36.51   17.68
   4   1 -12    4.78   13.78
   4  -1 -12  -16.18   15.52
  -4  -1  12   -6.75   15.04
  -4   1  12   23.60   15.66
   4   1 -11   38.24   17.38
   4  -1 -11   -0.74   20.38
  -4  -1  11   45.31   15.63
   4   1 -10   42.40   16.49
   4  -1 -10   55.94   16.94
  -4   1  10   72.92   19.67
  -4  -1  10   54.56   16.07
   4   1  -9   -6.20   14.67
   4  -1  -9    8.11    3.75
   4  -1  -9   58.73   15.53
  -4  -1   9   -0.77   10.93
  -4   1   9   31.77   11.28
   4   1  -8  228.58   21.25
   4   1  -8  246.19    6.65
   4  -1  -8  226.48   10.81
   4  -1  -8  284.67   25.08
  -4  -1   8  295.40   20.58
  -4   1   8  234.83   19.04
   4   1  -7    6.58   11.41
  -4  -1   7    9.28    3.39
  -4   1   7    4.58    6.72
  -4   1   7   18.79    8.27
  -4  -1   7    7.88    8.79
   4   1  -6  299.36   20.56
   4  -1  -6  273.26   12.07
  -4   1   6  251.51   17.19
  -4  -1   6  275.95   10.06
  -4  -1   6  258.82   16.90
  -4   1   6  294.13   21.26
   4   1  -5   35.88   10.56
   4  -1  -5   24.50    6.54
  -4  -1   5   24.64    7.56
  -4  -1   5   30.33    5.36
  -4   1   5   23.20   10.57
  -4   1   5   21.37    6.50
   4  -1  -4  324.20   14.86
  -4  -1   4  314.73   16.92
  -4  -1   4  316.09   13.59
  -4  -1   4  326.94   16.08
  -4   1   4  297.17   17.07
  -4   1   4  306.87   14.15
   4  -1  -3   23.05    8.75
  -4  -1   3   31.00    8.21
  -4  -1   3   62.46    7.73
  -4   1   3   36.28    5.45
  -4   1   3   40.89    8.23
  -4  -1   3   39.20    8.00
   4  -1  -2  354.97   16.21
  -4  -1   2  301.43   13.57
  -4  -1   2  311.52   15.86
  -4   1   2  329.22   10.50
  -4   1   2  344.58   16.54
  -4  -1   2  316.82   14.06
   4   1  -1  155.25   11.93
   4  -1  -1  155.65   12.18
  -4  -1   1  180.58   13.30
  -4  -1   1  170.99    9.98
  -4   1   1  173.82   13.58
   4   1   0   36.92    8.25
   4  -1   0   49.20    4.92
  -4  -1   0   35.72    6.11
  -4   1   0   41.65    8.16
  -4   1   0   23.71    8.45
  -4  -1   0   42.51    8.27
   4   1   1  410.12   17.71
   4  -1   1  390.66   11.81
  -4  -1  -1  382.21   15.37
  -4   1  -1  389.28   19.27
  -4   1  -1  412.29   18.84
  -4  -1  -1  381.11   18.57
   4  -1   2  129.32    8.14
   4   1   2  130.33   13.85
  -4  -1  -2  135.71   12.83
  -4   1  -2  137.64   14.92
  -4   1  -2  140.40   14.87
  -4  -1  -2  141.54   11.47
   4   1   3 1018.61   33.70
   4  -1   3 1046.60   26.90
  -4  -1  -3  967.36   29.82
  -4  -1  -3  994.28   35.71
  -4   1  -3  984.88   34.21
  -4   1  -3  972.63   36.25
   4   1   4    3.74   11.92
   4  -1   4   23.28    8.47
  -4  -1  -4   11.31    9.36
  -4  -1  -4   20.23    9.82
  -4   1  -4   -5.84   10.85
  -4   1  -4   36.95    9.50
   4   1   5 1594.17   50.59
   4  -1   5 1591.93   44.48
  -4  -1  -5 1620.75   48.16
  -4  -1  -5 1565.51   50.81
  -4   1  -5 1620.30   51.54
  -4   1  -5 1545.03   54.44
   4   1   6    1.10   13.94
   4  -1   6   -3.39   11.37
  -4  -1  -6   -1.59   11.67
  -4  -1  -6   26.86   11.36
  -4   1  -6   14.42   13.99
  -4   1  -6   15.34   10.23
   4   1   7  934.23   42.79
   4  -1   7  910.53   40.27
  -4  -1  -7  885.79   40.92
  -4  -1  -7  917.85   39.59
  -4   1  -7  822.03   46.34
   4   1   8  106.04   23.70
   4  -1   8   95.18   19.50
   4  -1   8   96.04   19.96
  -4  -1  -8   91.27   21.28
  -4   1  -8   88.80   24.61
  -4  -1  -8  107.56   19.39
   4   1   9  135.70   24.27
   4  -1   9  157.21   24.05
   4  -1   9  174.97   22.15
  -4  -1  -9  160.56   22.13
  -4  -1  -9  154.40   26.59
  -4   1  -9  200.80   29.38
   4   1  10   -4.97   19.43
   4  -1  10    8.09   14.96
   4  -1  10   10.49   14.81
  -4  -1 -10   42.99   14.58
  -4  -1 -10   -0.15   15.09
  -4   1 -10   -2.73   15.66
   4   1  11  322.07   38.49
   4  -1  11  375.78   29.07
   4  -1  11  317.76   34.48
  -4  -1 -11  323.81   37.37
  -4  -1 -11  248.88   28.11
  -4   1 -11  334.23   40.39
   4   1  12   43.36   26.64
   4  -1  12   20.09   19.23
   4  -1  12   58.71   19.40
  -4  -1 -12   36.38   18.91
  -4   1 -12   54.57   30.66
  -4  -1 -12   70.76   26.81
   4   1  13  210.94   41.93
   4  -1  13  244.25   36.28
   4  -1  13  234.83   27.45
  -4  -1 -13  229.60   26.90
  -4   1 -13  335.14   45.27
  -4  -1 -13  242.70   40.04
   4  -1  14   46.83   23.41
   4   1  14   12.45   26.13
  -4  -1 -14   -0.87   24.74
  -4   1 -14  -19.00   23.16
   4   1  15   59.93   35.37
   4  -1  15   17.95   31.14
  -4  -1 -15  113.79   36.52
  -4   1 -15   25.24   37.90
   4   2 -19   82.77   43.06
   4  -2 -19  158.60   46.76
  -4  -2  19  214.80   42.82
  -4   2  19   34.43   33.85
   4   2 -18   53.52   35.09
   4  -2 -18   60.14   30.11
  -4  -2  18   76.23   33.04
  -4   2  18   -4.79   26.42
   4   2 -17  106.08   37.09
   4  -2 -17   36.46   30.94
  -4  -2  17   71.85   27.02
  -4   2  17   57.87   34.39
   4   2 -16  120.07   33.93
   4  -2 -16   89.71   35.18
  -4  -2  16   18.17   25.06
  -4   2  16   80.42   34.20
   4   2 -15  198.87   40.08
   4  -2 -15  159.78   39.00
  -4  -2  15  261.76   37.57
  -4   2  15  219.69   38.76
   4   2 -14  141.38   27.22
   4  -2 -14   45.13   25.47
  -4  -2  14  129.06   23.50
  -4   2  14   59.99   30.12
   4   2 -13  335.46   36.05
   4  -2 -13  377.40   38.54
  -4  -2  13  311.97   31.42
  -4   2  13  350.00   38.73
   4   2 -12   38.24   22.99
   4  -2 -12    7.04   18.21
  -4  -2  12   39.79   20.27
  -4   2  12   57.72   18.46
   4   2 -11  460.08   35.06
   4  -2 -11  404.89   33.42
  -4  -2  11  371.12   33.52
  -4   2  11  420.76   34.42
   4   2 -10    4.53   19.05
   4  -2 -10   10.13   14.61
   4  -2 -10   21.77    5.68
  -4  -2  10   40.97   13.72
  -4   2  10   35.19   13.98
   4   2  -9  771.25   41.10
   4  -2  -9  742.03   38.42
   4  -2  -9  783.98   22.98
  -4  -2   9  757.36   35.61
  -4   2   9  748.57   34.99
   4   2  -8   26.07   14.23
   4  -2  -8   26.01    6.67
   4  -2  -8   13.92   11.97
  -4  -2   8   29.96   12.77
  -4  -2   8   14.85    3.47
  -4   2   8   25.37   12.64
   4   2  -7    2.38   12.38
   4  -2  -7   31.72    8.27
  -4  -2   7   39.65   10.15
  -4  -2   7   28.82    4.23
  -4   2   7   28.54   12.32
  -4   2   7   28.42   11.65
   4   2  -6   66.11   13.54
   4  -2  -6   72.96    9.24
  -4  -2   6   88.57    7.10
  -4  -2   6   53.67   13.15
  -4   2   6   64.52   15.33
  -4   2   6   60.29   12.56
   4   2  -5 1896.52   45.83
   4  -2  -5 1975.84   42.66
  -4   2   5 1956.47   50.62
  -4  -2   5 1930.69   37.60
  -4   2   5 1956.70   43.32
  -4  -2   5 1991.94   51.73
   4   2  -4   60.26    8.55
   4  -2  -4   71.11   10.04
  -4  -2   4   75.31    8.40
  -4   2   4   90.50   10.92
  -4   2   4   78.94    7.86
  -4  -2   4   71.10   11.61
   4  -2  -3 1087.53   32.66
  -4  -2   3 1036.28   28.94
  -4  -2   3 1039.99   32.02
  -4  -2   3 1078.30   27.30
  -4   2   3 1056.05   33.03
  -4   2   3 1071.91   22.05
   4  -2  -2  387.55   18.37
  -4  -2   2  405.93   19.54
  -4  -2   2  381.69   14.15
  -4   2   2  386.32   18.71
  -4   2   2  407.45   10.20
  -4  -2   2  407.08   18.35
   4  -2  -1  152.46   12.64
   4   2  -1  171.68   13.78
  -4  -2   1  148.68   12.97
  -4  -2   1  156.83    8.26
  -4   2   1  180.41   13.64
   4   2   0  198.17   13.73
   4  -2   0  200.36   16.33
   4  -2   0  213.69    4.96
  -4  -2   0  233.96    9.22
  -4   2   0  223.42   14.64
  -4  -2   0  215.01   15.36
   4  -2   1  636.56   28.36
   4  -2   1  642.67   11.39
   4   2   1  619.32   26.56
  -4  -2  -1  634.84   16.45
  -4  -2  -1  667.87   25.60
  -4   2  -1  609.99   27.62
   4  -2   2  103.60    6.46
   4  -2   2   83.96   15.96
   4   2   2   95.29   14.44
  -4  -2  -2  111.83    7.60
  -4  -2  -2  118.21   14.63
  -4   2  -2  102.15   15.05
   4  -2   3  120.91   14.58
   4  -2   3  125.62    8.86
   4   2   3  115.15   15.33
  -4   2  -3  115.69   14.64
  -4  -2  -3  125.37   13.29
  -4  -2  -3  125.70   10.22
   4   2   4  491.13   26.85
   4  -2   4  502.23   28.17
   4  -2   4  466.22   17.09
  -4   2  -4  454.93   28.69
  -4  -2  -4  437.77   19.64
  -4  -2  -4  458.87   24.16
   4  -2   5  101.95   12.34
   4  -2   5  118.36   15.93
   4   2   5   99.68   20.38
  -4  -2  -5  101.63   14.50
  -4  -2  -5  102.24   13.53
  -4   2  -5  115.06   17.09
   4  -2   6  752.02   37.45
   4  -2   6  752.22   29.76
   4   2   6  790.47   39.96
  -4  -2  -6  774.60   32.54
  -4  -2  -6  744.64   36.43
  -4   2  -6  780.68   43.64
   4  -2   7   40.81   16.81
   4  -2   7   27.44   13.13
   4   2   7   94.66   22.69
  -4  -2  -7   46.71   14.53
  -4  -2  -7   44.69   15.83
  -4   2  -7   47.87   17.99
   4   2   8  222.34   32.56
   4  -2   8  223.32   24.58
   4  -2   8  199.60   21.41
  -4  -2  -8  228.11   24.39
  -4   2  -8  172.61   31.30
  -4  -2  -8  245.82   25.37
   4  -2   9   63.89   18.08
   4  -2   9   62.82   18.63
   4   2   9  105.02   26.25
  -4  -2  -9   70.32   15.15
  -4   2  -9   57.92   24.98
  -4  -2  -9   65.88   19.58
   4  -2  10    1.20   15.88
   4  -2  10   13.36   17.58
  -4  -2 -10    0.56   17.98
  -4   2 -10   54.38   22.41
  -4  -2 -10   39.83   16.10
   4  -2  11   51.82   15.67
   4  -2  11    5.13   16.54
   4   2  11  -20.92   23.09
  -4  -2 -11   -3.71   15.63
  -4   2 -11    1.58   22.72
  -4  -2 -11   -2.12   18.43
   4   2  12  153.94   35.66
   4  -2  12  147.78   27.65
   4  -2  12  127.86   24.14
  -4  -2 -12  163.35   26.56
  -4  -2 -12  138.40   24.78
  -4   2 -12  144.57   31.77
   4   2  13   67.17   30.39
   4  -2  13   29.92   18.54
  -4  -2 -13   19.07   20.61
  -4   2 -13   26.58   25.24
  -4  -2 -13   27.98   26.07
   4   2  14   38.03   38.12
   4  -2  14  104.72   30.65
  -4   2 -14   97.85   40.45
  -4  -2 -14   89.73   28.02
   4  -2  15   39.51   26.22
   4   2  15    2.34   24.27
  -4   2 -15   -1.85   27.52
  -4  -2 -15    1.44   27.94
   4  -3 -18  133.86   37.42
   4   3 -18  100.48   44.22
  -4   3  18  111.99   35.46
  -4  -3  18  116.78   40.82
   4  -3 -17   37.70   26.38
   4   3 -17   10.44   27.52
  -4   3  17   -0.45   25.94
  -4  -3  17  -18.77   22.47
   4   3 -16   89.91   31.85
   4  -3 -16   95.98   30.28
  -4   3  16  201.72   38.04
  -4  -3  16  102.79   28.95
   4  -3 -15   29.72   24.22
   4   3 -15   67.17   21.87
  -4  -3  15  -16.59   18.68
  -4   3  15   14.02   20.07
   4  -3 -14  141.40   34.39
   4   3 -14  180.40   30.39
  -4   3  14  144.61   26.98
  -4  -3  14  168.96   30.86
   4  -3 -13   70.79   21.49
   4   3 -13   40.49   21.85
  -4   3  13   56.04   21.20
  -4  -3  13   81.72   20.27
   4  -3 -12  671.73   44.88
   4   3 -12  792.61   47.90
  -4  -3  12  718.25   42.10
  -4   3  12  695.59   42.62
   4  -3 -11    3.61    4.98
   4  -3 -11   -2.87   13.45
   4   3 -11   26.72   15.21
  -4   3  11   13.91   12.79
  -4  -3  11  -10.38   11.45
   4  -3 -10  724.25   46.46
   4  -3 -10  746.57   25.69
   4   3 -10  714.66   40.98
  -4   3  10  777.68   39.05
  -4  -3  10  773.78   40.06
   4  -3  -9   88.66   21.27
   4  -3  -9   73.03   11.62
   4   3  -9   68.70   20.29
  -4   3   9   56.12   18.72
  -4  -3   9   97.88   19.70
  -4  -3   9   66.62    5.47
   4  -3  -8  314.61   21.21
   4   3  -8  343.41   27.83
  -4   3   8  392.26   26.30
  -4   3   8  359.55   25.84
  -4  -3   8  382.15   25.50
  -4  -3   8  372.10   13.22
   4  -3  -7   -3.09    8.50
   4   3  -7    1.50   11.40
  -4   3   7   26.29   10.25
  -4   3   7   -4.22    9.80
  -4  -3   7   16.51    9.07
   4  -3  -6  632.73   28.02
   4   3  -6  688.17   29.29
  -4   3   6  630.34   29.05
  -4   3   6  675.57   26.91
  -4  -3   6  641.73   20.14
  -4  -3   6  711.61   32.45
   4  -3  -5  209.75   17.14
   4   3  -5  212.98   15.77
  -4  -3   5  226.96   17.23
  -4  -3   5  206.93   12.86
  -4   3   5  223.88   13.90
  -4   3   5  209.71   17.70
   4   3  -4 2969.04   56.20
   4  -3  -4 2880.75   62.47
  -4  -3   4 2987.13   68.46
  -4   3   4 2953.38   67.32
  -4   3   4 2841.13   48.20
  -4  -3   4 2947.22   57.40
   4   3  -3   12.27    5.83
   4  -3  -3    0.64    8.36
  -4   3   3   10.07    3.78
  -4   3   3   32.80    8.42
  -4  -3   3   34.91    8.20
  -4  -3   3    9.43    7.41
   4  -3  -2 2020.58   50.27
   4   3  -2 2009.42   34.29
  -4   3   2 1925.81   24.66
  -4   3   2 1923.80   51.51
  -4  -3   2 1980.16   49.57
  -4  -3   2 1897.55   46.05
   4  -3  -1   52.11   12.75
   4   3  -1   37.63   11.90
  -4   3   1   49.09    9.81
  -4  -3   1   39.06    3.92
  -4  -3   1   29.53    8.60
   4  -3   0  706.20   28.72
   4   3   0  626.44   28.98
  -4   3   0  696.57   29.91
  -4  -3   0  677.33   13.83
  -4  -3   0  672.15   27.78
   4  -3   1   59.18   13.13
   4   3   1  101.13   13.00
  -4   3  -1   67.01   14.35
  -4  -3  -1   66.97   12.74
  -4  -3  -1   89.62    5.12
   4  -3   2  970.67   13.40
   4  -3   2  977.13   38.27
   4   3   2  978.59   39.94
  -4   3  -2  997.20   39.43
  -4  -3  -2  927.51   34.39
  -4  -3  -2  961.45   19.49
   4  -3   3   40.44   13.81
   4  -3   3   40.34    4.45
   4   3   3   35.31   15.68
  -4   3  -3   48.56   15.06
  -4  -3  -3   62.22   12.63
  -4  -3  -3   27.69    5.83
   4  -3   4  413.31   15.07
   4  -3   4  415.17   25.48
   4   3   4  432.74   30.64
  -4   3  -4  387.42   28.80
  -4  -3  -4  400.98   26.53
  -4  -3  -4  409.79   15.99
   4  -3   5   77.80    8.68
   4  -3   5   70.99   15.43
   4   3   5   91.14   22.40
  -4   3  -5   86.10   17.24
  -4  -3  -5   94.60   14.52
  -4  -3  -5   74.07   10.03
   4  -3   6  136.57   13.13
   4  -3   6  132.48   17.75
   4   3   6  131.08   22.23
  -4   3  -6   88.85   24.98
  -4  -3  -6  103.20   14.32
  -4  -3  -6  138.81   20.55
   4  -3   7   83.38   12.91
   4  -3   7   84.21   19.53
   4   3   7   93.96   25.10
  -4   3  -7  105.03   25.27
  -4  -3  -7   82.35   13.08
  -4  -3  -7   64.84   16.49
   4  -3   8   32.71   12.93
   4  -3   8   29.40   16.82
   4   3   8   29.70   19.51
  -4   3  -8   54.47   23.32
  -4  -3  -8    1.77   16.43
  -4  -3  -8   39.58   12.65
   4  -3   9   95.87   18.63
   4  -3   9   52.83   16.89
   4   3   9   54.82   26.75
  -4  -3  -9   51.20   18.93
  -4   3  -9   57.56   25.13
  -4  -3  -9   38.59   14.94
   4  -3  10   33.38   17.77
   4  -3  10   54.06   18.73
   4   3  10   62.26   22.38
  -4  -3 -10   50.90   19.24
  -4   3 -10   58.74   27.37
  -4  -3 -10   40.78   19.46
   4  -3  11   12.47   16.68
   4   3  11   59.26   25.39
  -4   3 -11   15.84   20.63
  -4  -3 -11   13.58   17.24
  -4  -3 -11   -4.24   16.44
   4  -3  12   52.59   18.67
   4  -3  12   -4.75   19.83
   4   3  12    7.85   23.85
  -4   3 -12   19.64   22.19
  -4  -3 -12   14.86   18.02
  -4  -3 -12   13.71   20.98
   4  -3  13   13.70   18.15
   4   3  13   -8.07   20.93
  -4  -3 -13   -8.68   19.81
  -4   3 -13   23.68   21.22
  -4  -3 -13   -1.40   16.58
   4   3  14   14.36   27.17
  -4   3 -14   32.15   28.03
   4   3  15   58.77   29.03
  -4   3 -15  -15.51   37.74
   4  -4 -18  106.62   40.56
   4   4 -18   81.92   40.57
  -4   4  18    0.71   41.05
  -4  -4  18   66.82   36.07
   4  -4 -17  158.85   43.40
   4   4 -17  108.18   35.64
  -4   4  17  168.38   34.64
  -4  -4  17   90.04   37.30
   4  -4 -16   18.55   32.54
   4   4 -16   84.25   32.12
  -4   4  16   69.63   32.60
  -4  -4  16   36.58   29.25
   4  -4 -15  117.79   28.86
   4   4 -15  136.73   34.63
  -4   4  15   71.51   27.12
  -4  -4  15  112.68   26.21
   4  -4 -14   95.51   29.33
   4   4 -14   77.27   25.68
  -4   4  14   96.67   30.25
  -4  -4  14   94.18   27.76
   4  -4 -13   74.88   28.27
   4   4 -13  121.06   30.22
  -4   4  13  110.84   28.41
  -4  -4  13  100.31   22.10
   4  -4 -12  -13.68   17.30
   4   4 -12   50.89   15.57
  -4   4  12  -13.60   14.13
  -4  -4  12   -9.39   16.62
   4  -4 -11  509.22   26.01
   4  -4 -11  587.56   39.66
   4   4 -11  527.91   37.88
  -4   4  11  538.35   36.98
  -4  -4  11  575.41   37.00
   4  -4 -10    6.95    9.88
   4  -4 -10  -17.18   18.93
   4   4 -10   -2.96   17.82
  -4   4  10   11.35   16.57
  -4  -4  10   35.56   13.24
   4  -4  -9  434.96   27.22
   4   4  -9  353.04   29.37
  -4   4   9  362.35   30.39
  -4   4   9  386.80   29.77
  -4  -4   9  359.34   31.45
  -4  -4   9  365.15   14.59
   4  -4  -8   14.27   10.88
   4   4  -8   55.75   14.45
  -4   4   8   10.05   14.91
  -4   4   8    2.73   12.65
  -4  -4   8    2.27    5.25
  -4  -4   8   -8.30   12.68
   4  -4  -7  204.62   22.59
   4   4  -7  230.75   22.77
  -4   4   7  222.41   17.90
  -4   4   7  203.65   23.90
  -4  -4   7  198.45   12.70
  -4  -4   7  216.84   20.30
   4  -4  -6 1012.14   41.92
   4   4  -6  962.19   35.96
  -4   4   6 1023.03   35.62
  -4   4   6  989.77   38.31
  -4  -4   6 1070.15   31.93
  -4  -4   6  990.70   41.71
   4  -4  -5  327.49   23.07
   4   4  -5  341.80   19.62
  -4   4   5  346.44   18.33
  -4   4   5  396.90   23.13
  -4  -4   5  354.14   18.58
  -4  -4   5  333.34   21.76
   4  -4  -4  157.25   16.68
   4   4  -4  158.23   11.35
  -4   4   4  144.34    9.94
  -4   4   4  143.29   17.24
  -4  -4   4  134.41   15.41
  -4  -4   4  130.85   13.62
   4  -4  -3  643.97   32.45
   4   4  -3  657.89   19.62
  -4   4   3  696.44   31.86
  -4   4   3  653.46   17.69
  -4  -4   3  680.40   31.60
  -4  -4   3  672.37   27.78
   4  -4  -2  159.56   16.10
   4   4  -2  150.56    7.36
   4   4  -2  134.81   15.51
  -4   4   2  129.42    5.67
  -4   4   2  169.77   15.13
  -4  -4   2  178.19   15.81
   4  -4  -1  402.98   26.98
   4   4  -1  431.14    9.98
   4   4  -1  431.30   26.31
  -4   4   1  413.67   25.34
  -4  -4   1  428.08   22.44
   4  -4   0   80.85   14.44
   4   4   0   96.00   16.26
   4   4   0   73.10    2.62
  -4   4   0   43.59   15.02
  -4  -4   0   88.28   12.07
   4  -4   1   84.71   15.32
   4   4   1  116.72   15.53
  -4   4  -1   90.61   16.88
  -4  -4  -1   94.32   16.19
   4  -4   2  252.14   23.64
   4   4   2  249.23   21.96
  -4   4  -2  257.93   20.86
  -4  -4  -2  253.44   19.79
   4  -4   3  142.17   19.80
   4  -4   3   97.90    4.88
   4   4   3  103.41   16.95
  -4   4  -3  104.59   20.03
  -4  -4  -3  101.52   15.36
   4  -4   4  228.74    9.21
   4  -4   4  245.77   25.70
   4   4   4  208.64   23.32
  -4   4  -4  218.76   26.22
  -4  -4  -4  234.72   23.11
  -4  -4  -4  217.44   10.65
   4  -4   5   53.43   14.60
   4  -4   5   46.01    6.53
   4   4   5   67.05   21.28
  -4   4  -5   45.27   16.83
  -4  -4  -5   66.14   13.74
  -4  -4  -5   25.97    7.14
   4  -4   6   85.36   10.05
   4  -4   6   84.77   17.96
   4   4   6  123.19   22.10
  -4   4  -6   65.97   24.46
  -4  -4  -6  107.85   10.54
  -4  -4  -6   71.04   19.64
   4  -4   7    5.15    7.23
   4   4   7   21.39   17.59
  -4   4  -7    8.94   18.05
  -4  -4  -7    0.48    6.62
  -4  -4  -7   -6.68   10.32
   4  -4   8  132.30   20.28
   4  -4   8  124.46   15.26
   4   4   8  149.03   26.70
  -4   4  -8  119.24   25.06
  -4  -4  -8  121.18   15.35
  -4  -4  -8  130.69   19.99
   4  -4   9   -3.20   11.48
   4  -4   9   16.88   16.29
   4   4   9    3.08   18.89
  -4   4  -9   61.99   22.90
  -4  -4  -9    3.05   11.87
  -4  -4  -9   45.95   16.72
   4  -4  10  158.80   26.51
   4  -4  10  171.79   22.13
   4   4  10  228.29   32.59
  -4   4 -10  230.69   32.07
  -4  -4 -10  179.36   23.97
  -4  -4 -10  157.01   27.42
   4  -4  11   67.16   20.85
   4  -4  11  113.62   23.87
   4   4  11  121.44   35.60
  -4   4 -11   71.42   33.99
  -4  -4 -11  136.57   26.32
  -4  -4 -11   60.89   21.83
   4  -4  12   44.46   22.03
   4  -4  12   38.70   22.11
   4   4  12   63.92   29.50
  -4   4 -12   56.42   28.42
  -4  -4 -12   31.23   23.59
  -4  -4 -12   63.71   21.92
   4  -4  13   78.18   24.19
   4   4  13   75.23   33.52
  -4   4 -13   83.92   31.46
  -4  -4 -13   77.12   25.67
   4   4  14  107.58   36.37
  -4   4 -14   64.42   33.72
   4  -5 -18   -3.35   35.67
   4   5 -18   11.84   30.56
  -4   5  18   30.27   30.29
  -4  -5  18   92.45   33.11
   4  -5 -17  103.88   35.13
   4   5 -17  137.78   41.90
  -4   5  17   86.07   39.88
  -4  -5  17  132.38   38.99
   4  -5 -16   39.81   36.02
   4   5 -16   65.16   29.05
  -4   5  16   70.38   29.60
  -4  -5  16   74.90   26.94
   4  -5 -15   56.65   31.10
   4   5 -15   15.76   31.49
  -4   5  15   78.76   30.83
  -4  -5  15   24.98   28.15
   4  -5 -14   34.35   27.17
   4   5 -14   32.15   23.44
  -4   5  14   67.69   23.48
  -4  -5  14   26.35   20.52
   4   5 -13   -2.46   18.25
  -4   5  13    0.18   20.43
  -4  -5  13   21.66   16.37
   4  -5 -12    2.05   20.90
   4  -5 -12   38.62   11.90
  -4   5  12   14.32   21.44
  -4  -5  12   -8.33   19.51
   4  -5 -11   29.87   17.40
   4  -5 -11   35.67   12.29
   4   5 -11   50.53   22.43
  -4   5  11   26.25   20.89
  -4  -5  11   20.39   16.30
   4  -5 -10   40.53   16.54
   4  -5 -10   51.35   18.70
   4   5 -10   73.21   22.46
  -4   5  10   67.54   21.29
  -4  -5  10   57.16    8.36
  -4  -5  10   42.63   20.40
   4  -5  -9   -1.13   11.45
   4   5  -9   39.69   13.94
  -4   5   9   -8.20   12.97
  -4   5   9   17.13   13.94
  -4  -5   9   -5.27    5.70
   4  -5  -8   12.81   17.05
   4   5  -8   42.52   16.14
  -4   5   8   33.82   13.97
  -4   5   8   21.65   12.63
  -4  -5   8   13.64    8.23
  -4  -5   8   34.05   13.78
   4  -5  -7   32.70   18.95
   4   5  -7   38.80   14.13
  -4   5   7   33.02   13.40
  -4   5   7   31.27   14.35
  -4  -5   7   32.89   10.70
  -4  -5   7   26.28   13.72
   4  -5  -6  399.45   33.56
   4   5  -6  400.18   24.55
  -4   5   6  388.52   28.40
  -4   5   6  413.33   25.03
  -4  -5   6  406.22   24.12
  -4  -5   6  440.55   26.87
   4  -5  -5  251.56   28.31
   4   5  -5  257.41   16.65
  -4   5   5  254.57   16.92
  -4   5   5  269.35   24.04
  -4  -5   5  256.20   19.94
  -4  -5   5  256.61   21.12
   4  -5  -4  439.63   32.46
   4   5  -4  471.03   19.11
  -4   5   4  460.33   28.01
  -4   5   4  506.84   19.51
  -4  -5   4  464.31   24.32
  -4  -5   4  486.15   30.83
   4  -5  -3   66.24   21.03
   4   5  -3   97.71    7.74
  -4   5   3  101.65    7.85
  -4   5   3  109.34   17.93
  -4  -5   3  114.71   15.63
  -4  -5   3   90.43   13.37
   4  -5  -2  751.09   36.19
   4   5  -2  786.96   35.39
   4   5  -2  742.35   16.88
  -4   5   2  768.46   35.65
  -4   5   2  779.98   17.82
  -4  -5   2  752.64   34.04
   4  -5  -1  141.40   17.87
   4   5  -1  116.88    3.85
   4   5  -1  143.58   17.80
  -4   5   1  134.38   19.01
  -4   5   1  128.24    4.77
  -4  -5   1  124.30   15.18
   4  -5   0  459.62   29.43
   4   5   0  460.24   31.16
  -4   5   0  498.80   29.41
  -4  -5   0  435.95   27.39
   4  -5   1  839.22   39.11
   4   5   1  846.80   39.17
  -4   5  -1  873.76   38.27
  -4  -5  -1  847.57   39.08
   4  -5   2  617.98   34.58
   4   5   2  630.15   39.51
  -4   5  -2  640.57   36.49
  -4  -5  -2  621.64   34.48
   4  -5   3  469.58   31.64
   4   5   3  462.57   36.30
  -4   5  -3  494.37   34.55
  -4  -5  -3  445.11   28.52
   4  -5   4   30.79    4.75
   4  -5   4   65.14   16.54
   4   5   4   46.95   20.86
  -4   5  -4   62.93   19.86
  -4  -5  -4   60.50   16.64
   4  -5   5  210.19   11.34
   4  -5   5  205.59   28.20
   4   5   5  179.75   30.88
  -4   5  -5  221.72   29.86
  -4  -5  -5  237.49   23.00
   4  -5   6   13.46    5.95
   4  -5   6   11.89   17.10
  -4   5  -6    8.91   15.88
  -4  -5  -6   10.25    5.52
  -4  -5  -6    1.10   14.89
   4  -5   7  216.44   28.98
   4  -5   7  204.02   15.39
   4   5   7  181.57   36.70
  -4   5  -7  282.23   31.02
  -4  -5  -7  209.81   13.72
  -4  -5  -7  265.10   27.58
   4  -5   8    1.81    7.69
   4   5   8   38.40   20.04
  -4   5  -8   34.64   19.02
  -4  -5  -8   -1.94   11.76
  -4  -5  -8   -5.18    7.03
   4  -5   9  221.09   29.76
   4  -5   9  231.89   21.01
   4   5   9  258.09   41.66
  -4   5  -9  309.69   35.23
  -4  -5  -9  301.96   28.49
   4  -5  10   65.47   21.98
   4  -5  10   49.24   16.08
   4   5  10   78.20   31.85
  -4   5 -10   50.42   25.58
  -4  -5 -10   52.19   18.93
   4  -5  11  238.78   32.11
   4  -5  11  178.32   25.09
   4   5  11  232.97   40.28
  -4   5 -11  267.72   44.74
  -4  -5 -11  230.45   32.67
   4  -5  12  -11.54   19.01
   4   5  12  -28.63   30.60
  -4   5 -12   -5.88   23.31
  -4  -5 -12   -2.48   19.88
   4   5  13  132.80   44.75
  -4   5 -13  100.26   35.48
  -4  -5 -13   97.29   30.82
   4   5  14   12.91   30.32
  -4   5 -14  -13.29   25.07
   4  -6 -17   -7.87   25.38
   4   6 -17   12.10   26.75
  -4   6  17   -3.69   31.19
  -4  -6  17   36.48   23.09
   4  -6 -16  171.37   40.78
   4   6 -16  162.35   44.13
  -4   6  16   69.88   39.58
  -4  -6  16  170.96   38.74
   4  -6 -15   -3.29   25.12
   4   6 -15   -9.68   27.25
  -4   6  15   -1.69   22.53
  -4  -6  15   43.78   19.86
   4  -6 -14   26.47   22.32
  -4   6  14    8.27   25.64
  -4  -6  14   27.29   20.82
   4  -6 -13   54.68   20.86
   4   6 -13   -3.71   24.95
  -4   6  13   -8.10   24.17
  -4  -6  13   20.23   18.71
   4  -6 -12    6.54   15.86
   4  -6 -12   24.73   23.49
   4   6 -12   42.13   21.86
  -4   6  12   34.59   19.03
  -4  -6  12   26.83   22.12
   4  -6 -11   22.13   17.32
   4  -6 -11   39.08   15.69
   4   6 -11   20.62   16.67
  -4   6  11    5.46   20.55
  -4  -6  11  -18.79   19.34
   4   6 -10   -6.01   15.96
  -4   6  10  -10.05   16.88
  -4   6  10   -6.14    9.03
  -4  -6  10   11.54   16.36
  -4  -6  10   15.06    7.85
   4  -6  -9   45.03   18.01
   4   6  -9  -15.13   16.28
  -4   6   9   -1.25   15.41
  -4   6   9   26.09   14.07
  -4  -6   9   12.01   16.91
  -4  -6   9    1.54   10.40
   4  -6  -8   44.52   21.64
   4   6  -8   34.06   17.43
  -4   6   8   67.46   19.30
  -4   6   8   46.08   18.10
  -4  -6   8   37.83   13.94
  -4  -6   8   43.90   20.16
   4  -6  -7   51.79   20.96
   4   6  -7    5.66   14.44
  -4   6   7   46.50   15.70
  -4   6   7   34.38   16.46
  -4  -6   7   35.21   14.57
  -4  -6   7   23.43   11.48
   4  -6  -6   34.46   23.14
   4   6  -6   29.25   13.17
  -4   6   6   51.87   14.31
  -4   6   6   41.25   13.68
  -4  -6   6   35.64   14.53
  -4  -6   6   35.55   14.87
   4  -6  -5   33.91   22.41
   4   6  -5   23.34    9.72
  -4   6   5   38.79   12.23
  -4   6   5   35.48   15.63
  -4  -6   5   31.18   15.11
  -4  -6   5   35.95   14.77
   4  -6  -4   64.99   24.92
   4   6  -4   92.87   10.24
  -4   6   4  106.62   18.31
  -4   6   4   69.79   10.99
  -4  -6   4   87.68   18.25
  -4  -6   4   53.06   16.91
   4  -6  -3   57.08   15.68
   4   6  -3   34.40   16.27
   4   6  -3   12.27    6.20
  -4   6   3    0.82    6.03
  -4   6   3   58.51   12.43
  -4  -6   3    3.22   14.23
   4  -6  -2   44.10   20.12
   4   6  -2   67.43   16.97
   4   6  -2   73.77    5.58
  -4   6   2   59.54    6.83
  -4   6   2   87.34   17.77
  -4  -6   2  103.23   18.74
   4  -6  -1   95.83   25.25
   4   6  -1   80.77   18.29
  -4   6   1   89.06   18.49
  -4   6   1   88.32    6.35
  -4  -6   1   93.72   16.06
   4  -6   0  713.34   42.12
   4   6   0  698.92   39.42
  -4   6   0  674.68   38.59
  -4  -6   0  711.99   36.02
   4  -6   1   49.49   22.60
   4   6   1   54.92   16.93
  -4   6  -1   53.56   18.17
  -4  -6  -1   33.47   14.78
   4  -6   2  450.01   35.37
   4   6   2  528.36   35.86
  -4   6  -2  464.77   34.39
  -4  -6  -2  450.76   30.01
   4  -6   3   59.13   23.66
   4   6   3   64.31   23.68
  -4   6  -3   51.98   21.81
  -4  -6  -3   57.62   16.55
   4  -6   4  418.37   37.01
   4   6   4  398.63   39.22
  -4   6  -4  369.06   31.32
  -4  -6  -4  378.34   31.70
   4  -6   5   35.56   19.20
   4   6   5  134.15   27.28
  -4   6  -5   44.08   19.84
  -4  -6  -5   85.89   17.79
   4  -6   6  167.24   25.71
   4   6   6  243.83   31.75
  -4   6  -6  217.46   32.93
  -4  -6  -6  147.11   27.35
   4  -6   7   53.31   18.18
   4   6   7   78.49   27.08
  -4   6  -7  -15.09   24.51
  -4  -6  -7   42.13   19.90
   4  -6   8   68.63   25.29
   4   6   8   83.09   26.74
  -4   6  -8   97.97   25.02
  -4  -6  -8   85.64   23.93
   4  -6   9   -1.99   18.68
   4   6   9  -21.86   24.18
  -4   6  -9    2.03   22.40
  -4  -6  -9   -6.50   14.53
   4  -6  10  114.54   27.83
   4   6  10  181.74   39.19
  -4   6 -10   66.21   36.28
  -4  -6 -10   75.52   23.05
   4  -6  11   14.94   24.39
   4   6  11  107.47   29.68
  -4   6 -11   29.78   27.75
  -4  -6 -11   36.50   23.76
   4  -6  12  109.99   29.98
   4   6  12   83.74   43.26
  -4   6 -12  119.09   42.39
  -4  -6 -12  132.44   30.79
   4   6  13   -0.59   32.80
  -4   6 -13   -2.95   25.43
  -4  -6 -13   17.13   22.43
   4  -7 -16   46.90   33.36
   4   7 -16   20.78   35.97
  -4   7  16   61.44   29.38
  -4  -7  16   26.01   27.18
   4  -7 -15   26.96   32.29
   4   7 -15   54.70   33.21
  -4   7  15   60.75   28.08
  -4  -7  15   58.71   25.64
   4  -7 -14   69.51   31.86
   4   7 -14   63.89   27.65
  -4   7  14   71.61   32.62
  -4  -7  14   54.53   25.86
   4  -7 -13    3.33   22.98
   4   7 -13  -15.98   24.34
  -4   7  13  -23.56   25.15
  -4  -7  13  -11.89   18.42
   4  -7 -12   99.03   31.30
   4  -7 -12  110.38   22.18
   4   7 -12  136.06   27.53
  -4   7  12  114.05   35.91
  -4  -7  12  149.37   30.44
   4  -7 -11   15.45   14.43
   4  -7 -11   -8.45   16.59
   4   7 -11  -22.02   16.77
  -4   7  11    8.69   17.25
  -4  -7  11   -3.41   16.21
   4  -7 -10   24.36   18.25
   4   7 -10    1.85   17.57
  -4   7  10    2.67   17.74
  -4   7  10   28.45   17.26
  -4  -7  10   -6.08   11.67
   4  -7  -9   52.24   25.80
   4   7  -9  105.18   22.87
  -4   7   9  117.84   23.57
  -4   7   9   52.57   23.63
  -4  -7   9   84.12   24.04
  -4  -7   9   57.55   16.75
   4  -7  -8   72.68   23.82
   4   7  -8   29.20   16.27
  -4   7   8   15.57   17.18
  -4   7   8   10.58   15.19
  -4  -7   8    6.08   18.94
  -4  -7   8   21.91   14.42
   4  -7  -7  132.19   31.36
   4   7  -7  172.57   21.43
  -4   7   7  153.02   23.91
  -4   7   7  156.05   23.38
  -4  -7   7  130.65   22.13
  -4  -7   7  151.26   22.31
   4  -7  -6  146.67   31.76
   4   7  -6   94.22   17.48
  -4   7   6  124.09   19.46
  -4   7   6  115.33   18.96
  -4  -7   6   72.96   20.42
  -4  -7   6  104.33   21.28
   4  -7  -5   62.87   28.63
   4   7  -5   55.67   12.81
  -4   7   5   36.25   17.39
  -4   7   5   78.39   13.17
  -4  -7   5   40.20   17.96
  -4  -7   5   64.95   15.71
   4  -7  -4   90.08   26.21
   4   7  -4   90.90   10.76
   4   7  -4   86.39   20.31
  -4   7   4  134.27   20.08
  -4   7   4  105.05   12.67
  -4  -7   4   94.54   18.19
   4  -7  -3  120.67   25.72
   4   7  -3  135.29    9.29
   4   7  -3  138.12   22.28
  -4   7   3  133.85   11.91
  -4   7   3  120.27   22.04
  -4  -7   3  155.02   20.81
   4  -7  -2   73.40   30.31
   4   7  -2   57.57   20.03
  -4   7   2   97.26    9.44
  -4   7   2  101.99   16.35
  -4  -7   2   46.75   22.32
   4  -7  -1  108.95   24.59
   4   7  -1  118.67   25.04
  -4   7   1   96.08   21.76
  -4   7   1  101.05    9.32
  -4  -7   1  138.21   20.44
   4  -7   0  -13.48   19.01
   4   7   0   48.91   17.50
  -4   7   0   10.96   14.33
  -4  -7   0   54.08   17.95
   4  -7   1  481.91   38.94
   4   7   1  584.96   39.07
  -4   7  -1  502.83   33.86
  -4  -7  -1  456.71   33.71
   4  -7   2    6.01   23.63
   4   7   2   25.36   22.35
  -4   7  -2   40.49   18.92
  -4  -7  -2   19.96   14.83
   4  -7   3  370.04   38.43
   4   7   3  196.95   33.32
  -4   7  -3  219.98   26.00
  -4  -7  -3  260.23   29.91
   4  -7   4    0.89   24.75
   4   7   4   44.61   20.84
  -4   7  -4   34.51   21.91
   4  -7   5  195.20   29.58
   4   7   5  222.29   30.48
  -4   7  -5  220.07   32.66
  -4  -7  -5  181.75   25.36
   4  -7   6   59.30   22.52
   4   7   6   22.45   26.63
  -4   7  -6    9.17   18.47
   4  -7   7  314.47   40.33
   4   7   7  338.26   46.23
  -4   7  -7  330.54   36.65
  -4  -7  -7  345.73   35.94
   4  -7   8   17.40   16.52
  -4   7  -8   18.81   23.40
  -4  -7  -8   -7.46   15.80
   4  -7   9  359.68   43.02
   4   7   9  408.45   51.27
  -4   7  -9  350.86   41.51
  -4  -7  -9  303.01   38.06
   4  -7  10   69.15   25.56
   4   7  10   19.74   26.37
  -4   7 -10    8.63   22.66
  -4  -7 -10   -4.23   22.06
   4  -7  11  172.64   36.42
   4   7  11  202.12   46.90
  -4   7 -11   82.18   35.55
  -4  -7 -11  138.84   33.37
   4   7  12    6.61   22.12
  -4   7 -12    8.69   23.47
  -4  -7 -12   -5.71   14.61
   4   7  13   69.12   38.77
  -4   7 -13  102.29   42.94
   4  -8 -15   71.25   32.37
   4   8 -15   30.20   29.15
  -4   8  15   73.02   37.43
  -4  -8  15   37.94   32.57
   4  -8 -14    5.68   31.27
   4   8 -14  118.73   35.11
  -4   8  14   33.77   32.19
  -4  -8  14   47.89   30.74
   4  -8 -13   35.14   28.96
   4   8 -13   71.54   32.87
  -4   8  13   62.41   33.38
  -4  -8  13   48.36   23.29
   4  -8 -12   72.73   25.88
   4   8 -12   46.52   21.83
  -4   8  12   -7.27   26.47
  -4  -8  12  -22.57   24.83
   4  -8 -11   81.28   28.90
   4  -8 -11  106.85   23.92
   4   8 -11   70.99   28.64
  -4   8  11   35.63   30.04
  -4  -8  11  127.48   29.17
   4  -8 -10   27.37   23.84
   4   8 -10   15.01   21.65
  -4   8  10   41.91   23.39
  -4   8  10   74.11   21.91
  -4  -8  10    2.74   19.11
  -4  -8  10    4.01   15.78
   4  -8  -9  107.57   28.33
   4   8  -9  200.71   26.99
  -4   8   9  151.98   28.38
  -4   8   9  153.11   28.86
  -4  -8   9  168.03   30.96
  -4  -8   9  181.29   24.18
   4  -8  -8   62.08   24.79
   4   8  -8   86.82   20.11
  -4   8   8   49.51   22.23
  -4  -8   8   68.73   20.18
  -4   8   8   49.61   22.91
  -4  -8   8   69.15   24.65
   4  -8  -7  202.04   34.66
   4   8  -7  278.58   25.77
  -4   8   7  281.50   29.90
  -4   8   7  334.83   28.14
  -4  -8   7  263.77   26.56
  -4  -8   7  325.12   35.05
   4  -8  -6   67.70   31.04
   4   8  -6   56.65   15.36
  -4   8   6   70.19   20.10
  -4   8   6   65.66   18.05
  -4  -8   6   42.65   20.24
  -4  -8   6   59.19   24.08
   4  -8  -5  298.62   43.25
   4   8  -5  222.43   17.11
   4   8  -5  225.58   31.31
  -4   8   5  270.41   27.43
  -4   8   5  234.26   20.86
  -4  -8   5  247.50   29.67
   4  -8  -4   85.14   27.69
   4   8  -4   59.97    9.67
   4   8  -4  118.63   24.69
  -4   8   4   86.77   19.71
  -4   8   4   79.37   13.16
  -4  -8   4   45.84   22.71
   4  -8  -3   82.53   34.94
   4   8  -3  100.17   27.23
  -4   8   3   93.14   18.82
  -4   8   3  106.08   14.89
  -4  -8   3   94.89   24.73
   4  -8  -2    7.82   19.77
   4   8  -2   25.58   16.34
  -4   8   2   29.73   15.90
  -4   8   2   -0.60    9.26
  -4  -8   2   27.23   15.19
   4  -8  -1  130.66   25.78
   4   8  -1   71.93   20.60
  -4   8   1   60.63    9.86
  -4   8   1   59.57   21.21
  -4  -8   1   55.95   19.56
   4  -8   0   99.96   26.70
   4   8   0   68.92   25.75
  -4   8   0   72.97   21.86
  -4  -8   0   56.01   24.50
   4  -8   1  167.33   35.17
   4   8   1  141.51   30.22
  -4   8  -1  124.97   22.36
  -4  -8  -1  149.50   27.73
   4  -8   2  179.92   28.99
   4   8   2  115.13   27.10
  -4   8  -2  146.83   22.81
  -4  -8  -2  112.17   26.73
   4  -8   3   18.56   19.40
  -4   8  -3   18.68   16.30
  -4  -8  -3    2.14   19.18
   4  -8   4  -17.96   18.62
  -4   8  -4   51.76   16.88
  -4  -8  -4  -14.11   17.48
   4  -8   5   -6.26   24.31
   4   8   5   10.73   23.46
  -4   8  -5   -0.20   16.94
  -4  -8  -5   25.33   15.45
   4  -8   6  102.27   28.78
   4   8   6  107.17   29.05
  -4   8  -6  120.53   32.71
  -4  -8  -6  100.65   27.37
   4  -8   7   28.65   23.27
   4   8   7   53.60   24.76
  -4   8  -7   23.46   27.62
  -4  -8  -7   17.79   19.64
   4  -8   8  224.56   42.72
   4   8   8  294.26   48.31
  -4   8  -8  280.45   37.17
  -4  -8  -8  304.15   38.16
   4  -8   9   26.11   27.82
   4   8   9  -15.60   32.62
  -4   8  -9   39.87   29.26
  -4  -8  -9   27.44   24.66
   4  -8  10   81.96   35.03
   4   8  10   83.19   36.97
  -4   8 -10  137.40   40.48
  -4  -8 -10  110.99   27.16
   4  -8  11  -10.64   26.11
   4   8  11   29.42   35.46
  -4   8 -11  -12.39   24.82
  -4  -8 -11   38.12   20.16
   4   8  12   37.11   41.13
  -4   8 -12   57.16   31.37
  -4  -8 -12   16.84   29.86
   4  -9 -14  112.84   40.10
   4   9 -14  217.21   44.02
  -4   9  14  201.60   42.25
  -4  -9  14  110.16   39.77
   4  -9 -13  -16.64   29.13
   4   9 -13   67.91   31.80
  -4   9  13   75.72   28.43
  -4  -9  13   43.55   29.77
   4  -9 -12  232.17   38.87
   4  -9 -12  221.30   34.53
   4   9 -12  246.81   40.39
  -4  -9  12  251.76   42.03
  -4   9  12  299.10   45.26
   4  -9 -11   -9.05   23.53
   4  -9 -11   59.34   24.82
   4   9 -11   55.53   22.35
  -4   9  11   -7.13   20.95
  -4  -9  11  -21.33   23.50
   4   9 -10  584.26   45.29
   4  -9 -10  611.07   54.25
  -4   9  10  559.33   44.98
  -4   9  10  644.89   48.38
  -4  -9  10  526.31   49.43
  -4  -9  10  510.25   40.23
   4  -9  -9   35.74   26.73
   4   9  -9    5.55   18.75
  -4   9   9   21.68   19.49
  -4   9   9   12.74   22.51
  -4  -9   9   25.63   18.09
  -4  -9   9   -4.78   17.69
   4  -9  -8  474.16   46.20
   4   9  -8  403.70   34.88
  -4   9   8  448.67   35.79
  -4   9   8  431.33   40.91
  -4  -9   8  482.86   39.91
  -4  -9   8  399.04   37.67
   4  -9  -7   28.64   26.70
   4   9  -7   17.38   13.11
  -4   9   7    9.99   16.68
  -4  -9   7   12.46   18.40
  -4  -9   7   -3.88   17.93
   4  -9  -6  481.64   52.88
   4   9  -6  415.48   28.15
   4   9  -6  464.73   44.56
  -4   9   6  450.69   33.39
  -4   9   6  526.41   36.88
  -4  -9   6  448.96   39.85
   4  -9  -5   98.97   30.47
   4   9  -5   35.49   11.96
   4   9  -5   24.57   25.03
  -4   9   5   55.92   15.90
  -4   9   5    8.36   15.14
  -4  -9   5   40.87   18.17
   4  -9  -4   86.39   28.69
   4   9  -4   58.91   26.23
  -4   9   4   52.36   20.94
  -4   9   4   76.50   14.88
  -4  -9   4   51.85   25.18
   4  -9  -3   32.64   30.86
   4   9  -3   68.09   24.36
  -4   9   3   32.52   13.11
  -4   9   3   34.88   15.91
  -4  -9   3   18.73   22.95
   4  -9  -2  238.28   35.51
   4   9  -2  170.99   28.74
  -4   9   2  205.27   27.36
  -4   9   2  163.72   15.52
  -4  -9   2  212.93   27.32
   4  -9  -1   60.38   24.14
   4   9  -1    9.02   18.98
  -4   9   1   16.66   18.32
  -4  -9   1    6.72   17.01
   4  -9   0  150.27   40.15
   4   9   0  230.61   36.06
  -4   9   0  200.97   30.18
  -4  -9   0  261.53   35.87
   4   9   1    3.25   15.92
   4  -9   1   -7.78   18.87
  -4   9  -1  -13.42   16.31
  -4  -9  -1    5.05   18.44
   4  -9   2  265.64   44.86
   4   9   2  325.17   41.20
  -4   9  -2  334.76   35.48
  -4  -9  -2  351.61   34.90
   4  -9   3  -22.70   24.50
   4   9   3   28.14   21.44
  -4   9  -3   -2.79   15.87
  -4  -9  -3   10.55   16.17
   4  -9   4   87.10   27.25
   4   9   4   47.89   25.91
  -4   9  -4  105.18   28.25
  -4  -9  -4   49.88   21.45
   4  -9   5  108.99   34.51
   4   9   5   77.13   27.89
  -4   9  -5   62.40   24.59
  -4  -9  -5   52.50   28.04
   4  -9   6   21.88   27.72
   4   9   6   77.83   27.01
  -4   9  -6   46.03   30.40
  -4  -9  -6   24.98   26.67
   4  -9   7   28.97   27.27
   4   9   7   36.28   34.12
  -4   9  -7   84.31   31.51
  -4  -9  -7   53.43   23.63
   4  -9   8   10.82   32.99
   4   9   8   54.10   36.96
  -4   9  -8   19.15   27.35
  -4  -9  -8  124.83   29.06
   4  -9   9    7.88   35.44
   4   9   9   87.54   31.39
  -4   9  -9   35.75   33.33
  -4  -9  -9   57.70   29.16
   4  -9  10   -2.72   30.38
   4   9  10   26.52   34.88
  -4  -9 -10   16.65   21.42
   4   9  11   11.30   39.69
  -4   9 -11   83.93   35.36
  -4  -9 -11   -2.12   23.45
   4  10 -13  162.78   42.49
  -4  10  13  146.49   47.00
  -4 -10  13  178.07   43.17
   4 -10 -12    4.48   26.21
   4 -10 -12   16.86   20.22
   4  10 -12    2.29   24.67
  -4  10  12  -13.32   22.38
  -4 -10  12   15.66   20.63
   4 -10 -11  384.47   44.14
   4 -10 -11  346.08   44.74
   4  10 -11  326.60   42.04
  -4  10  11  292.15   40.86
  -4 -10  11  297.04   40.10
   4 -10 -10   -4.01   27.83
   4  10 -10  -15.05   21.51
  -4  10  10    3.93   26.44
  -4  10  10    5.76   22.75
  -4 -10  10    1.25   24.89
  -4 -10  10   83.61   22.61
   4 -10  -9  237.01   45.43
   4  10  -9  195.79   30.59
  -4  10   9  223.14   35.86
  -4  10   9  143.07   31.65
  -4 -10   9  237.57   39.77
  -4 -10   9  140.92   32.87
   4 -10  -8   13.33   32.68
   4  10  -8   43.00   19.53
  -4  10   8   37.08   23.05
  -4  10   8   11.36   24.24
  -4 -10   8   40.23   23.92
  -4 -10   8   51.48   24.24
   4  10  -7  184.39   26.39
   4 -10  -7  273.96   46.62
   4  10  -7  281.75   40.12
  -4  10   7  246.25   31.65
  -4  10   7  208.42   28.79
  -4 -10   7  239.12   36.21
   4 -10  -6    7.38   30.81
   4  10  -6  -15.64   23.71
  -4  10   6   25.85   17.31
  -4 -10   6    4.62   21.14
  -4  10   6   17.92   18.44
   4 -10  -5  172.81   42.14
   4  10  -5  125.01   27.96
  -4  10   5  111.83   23.74
  -4  10   5  131.48   23.12
  -4 -10   5  130.86   26.66
   4 -10  -4   -5.20   24.94
   4  10  -4   15.26   24.30
  -4 -10   4   29.26   23.64
  -4  10   4   26.53   19.10
  -4  10   4   18.71   13.73
   4 -10  -3   40.48   23.89
   4  10  -3  -22.54   22.18
  -4 -10   3   11.94   21.69
  -4  10   3    7.22   17.13
   4 -10  -2   43.87   25.94
   4  10  -2    8.15   26.06
  -4  10   2   38.85   20.22
  -4 -10   2   -7.43   23.69
   4 -10  -1  102.06   28.90
   4  10  -1    8.32   28.86
  -4  10   1   12.64   21.61
  -4 -10   1   50.54   22.27
   4  10   0  -25.15   17.61
  -4  10   0   11.24   15.05
  -4 -10   0    6.32   13.80
   4 -10   1  126.99   32.82
   4  10   1  127.22   34.21
  -4  10  -1   53.20   28.54
  -4 -10  -1   99.90   32.21
   4 -10   2   62.28   27.05
   4  10   2   34.49   28.04
  -4  10  -2   15.68   18.75
  -4 -10  -2    4.14   23.99
   4 -10   3  188.57   37.74
   4  10   3  121.09   39.50
  -4  10  -3  193.30   35.02
  -4 -10  -3  151.12   29.99
   4  10   4   97.92   38.40
   4 -10   4  143.42   43.06
  -4  10  -4   85.22   32.21
  -4 -10  -4  146.10   28.90
   4 -10   5   30.81   33.97
   4  10   5   70.98   33.08
  -4  10  -5   29.98   27.54
  -4 -10  -5   12.04   26.48
   4 -10   6  103.51   41.04
   4  10   6   85.37   33.90
  -4  10  -6   87.38   34.55
  -4 -10  -6   95.04   33.12
   4 -10   7   41.94   39.18
   4  10   7   78.66   38.53
  -4  10  -7   48.23   35.06
  -4 -10  -7  108.61   31.59
   4  10   8   41.54   40.34
   4 -10   8  129.19   38.23
  -4  10  -8  -21.45   36.32
  -4 -10  -8   54.63   31.53
   4 -10   9   25.35   29.44
   4  10   9  112.43   38.84
  -4  10  -9   31.54   34.86
  -4 -10  -9   -1.98   29.49
   4 -10  10  -38.12   38.07
   4  10  10   34.92   33.07
  -4  10 -10   20.58   30.72
  -4 -10 -10   72.98   31.67
  -4  11  12   58.88   36.65
  -4 -11  12   37.44   35.54
   4 -11 -11   25.55   23.63
  -4  11  11   -1.89   22.18
  -4 -11  11  -23.52   22.88
   4 -11 -10   58.84   38.31
  -4  11  10   25.78   33.09
  -4  11  10   36.41   28.40
  -4 -11  10  116.02   35.09
   4 -11  -9   39.95   37.42
   4  11  -9   27.64   27.34
  -4  11   9   34.10   23.79
  -4  11   9    6.68   27.66
  -4 -11   9  111.60   27.77
   4 -11  -8  100.10   40.65
   4  11  -8   92.74   35.30
  -4  11   8   67.06   29.43
  -4  11   8   60.61   27.16
  -4 -11   8   71.22   30.65
   4 -11  -7   12.60   37.23
   4  11  -7   79.57   32.78
  -4  11   7   60.69   23.49
  -4  11   7   15.21   23.90
  -4 -11   7   36.59   27.68
   4  11  -6   83.93   36.48
   4 -11  -6  144.14   36.98
  -4  11   6   96.83   23.79
  -4  11   6  104.23   27.26
  -4 -11   6   69.68   32.94
   4 -11  -5   41.82   39.17
   4  11  -5   81.82   32.09
  -4  11   5   38.86   23.47
  -4 -11   5   69.41   30.37
   4  11  -4   97.62   28.90
   4 -11  -4  134.17   44.17
  -4  11   4   74.55   21.77
  -4 -11   4   99.83   34.25
   4 -11  -3  131.41   37.26
   4  11  -3   60.42   32.92
  -4  11   3   95.70   21.27
  -4 -11   3   94.64   35.87
   4 -11  -2   -3.80   35.00
   4  11  -2    0.57   29.10
  -4  11   2   32.94   17.95
   4 -11  -1   33.45   41.59
   4  11  -1  121.68   30.03
  -4  11   1   53.00   26.96
  -4 -11   1  153.73   35.50
   4  11   0   38.72   31.24
   4 -11   0   96.22   39.31
  -4  11   0   51.98   25.24
  -4 -11   0    2.90   23.73
   4 -11   1   71.25   30.84
   4  11   1  -25.79   33.33
  -4  11  -1   24.80   25.73
  -4 -11  -1   72.39   29.54
   4 -11   2  -20.42   29.05
   4  11   2   21.57   23.61
  -4  11  -2   12.59   23.59
  -4 -11  -2   32.27   21.28
   4 -11   3   -4.87   27.96
   4  11   3   31.39   25.11
  -4  11  -3   19.44   25.15
  -4 -11  -3   12.83   21.98
   4  11   4  -11.14   30.88
   4 -11   4   -0.67   35.77
  -4  11  -4   60.70   28.15
  -4 -11  -4    6.45   28.39
   4 -11   5  254.86   46.80
   4  11   5  230.54   41.43
  -4  11  -5  195.07   44.36
  -4 -11  -5  223.88   43.29
   4 -11   6   22.60   40.98
   4  11   6  100.32   38.31
  -4  11  -6   19.27   34.01
  -4 -11  -6   40.87   33.67
   4 -11   7  232.42   51.32
   4  11   7  149.57   40.41
  -4  11  -7   95.60   42.06
  -4 -11  -7  107.21   33.59
   4 -11   8  -27.79   35.41
   4  11   8    0.54   34.32
  -4  11  -8   28.83   28.85
  -4 -11  -8  -25.75   26.39
   4 -12 -10  106.44   41.96
   4  12 -10    5.11   29.58
   4 -12  -9    4.32   35.49
   4  12  -9  -12.76   31.17
  -4 -12   9  -15.61   25.13
   4 -12  -8   18.91   46.88
   4  12  -8  118.57   42.35
  -4 -12   8  126.18   35.19
   4 -12  -7    9.22   26.78
   4  12  -7   22.68   28.37
  -4  12   7   -7.09   20.37
  -4 -12   7    8.19   24.91
   4 -12  -6   89.72   43.54
   4  12  -6   42.90   35.23
  -4  12   6   58.66   26.85
  -4 -12   6   42.35   32.16
   4 -12  -5  -20.88   33.29
   4  12  -5  -14.24   27.21
  -4  12   5    2.71   19.89
  -4 -12   5   -4.27   26.10
   4 -12  -4   69.13   43.78
   4  12  -4   98.24   37.22
  -4  12   4   61.31   27.17
  -4 -12   4   63.36   36.18
   4 -12  -3   -4.00   27.47
   4  12  -3   10.63   23.27
  -4  12   3   -2.95   15.68
   4 -12  -2  183.25   50.78
   4  12  -2  194.51   36.63
  -4  12   2  203.39   34.70
  -4 -12   2   81.08   35.87
   4 -12  -1   10.88   25.17
   4  12  -1   -2.21   26.06
  -4  12   1   -6.71   20.44
  -4 -12   1  -12.85   21.65
   4 -12   0  125.84   41.34
   4  12   0  147.68   35.46
  -4  12   0   92.04   31.83
  -4 -12   0  130.26   40.00
   4 -12   1  106.22   41.29
   4  12   1   50.06   32.46
  -4 -12  -1   18.05   32.26
  -4  12  -1  -12.46   27.75
   4 -12   2   31.99   38.13
   4  12   2   -8.81   26.43
  -4  12  -2    3.41   26.48
  -4 -12  -2   39.73   23.98
   4 -12   3   -3.01   30.79
   4  12   3   79.24   32.73
  -4  12  -3  -16.65   22.31
  -4 -12  -3   12.41   27.56
   4 -12   4  -14.49   42.95
   4  12   4   82.27   32.37
  -4  12  -4   23.93   32.52
  -4 -12  -4   30.48   33.01
   4 -12   5    3.11   35.33
   4  12   5    0.19   31.14
  -4  12  -5   14.35   33.72
  -4 -12  -5   83.60   33.35
   4 -12   6  232.37   57.57
   4  12   6   92.68   51.31
  -4  12  -6  141.03   44.86
  -4 -12  -6  157.04   45.28
   4 -13  -7   34.82   37.62
   4  13  -7  -27.42   29.78
  -4 -13   7   -6.81   29.00
   4 -13  -6  -23.85   34.49
   4  13  -6   -8.14   26.65
  -4 -13   6    9.65   30.77
   4 -13  -5   -7.01   30.41
   4  13  -5   17.21   31.24
  -4 -13   5   10.98   29.12
   4 -13  -4   53.72   38.65
   4  13  -4   35.03   38.72
  -4 -13   4   55.76   29.56
   4 -13  -3   -2.10   44.20
   4  13  -3  -18.03   34.67
  -4  13   3   99.98   26.83
  -4 -13   3  -19.88   35.74
   4 -13  -2   82.33   34.38
   4  13  -2   24.57   33.05
  -4  13   2   -1.18   25.27
  -4 -13   2   -3.74   34.89
   4 -13  -1   72.74   51.31
   4  13  -1  126.42   36.94
  -4  13   1   50.51   34.21
  -4 -13   1   90.24   43.78
   4 -13   0  -26.86   33.33
   4  13   0   27.61   34.21
  -4  13   0   41.33   26.55
  -4 -13   0    5.62   34.47
   4 -13   1   74.87   41.10
   4  13   1  104.07   41.15
  -4  13  -1   86.69   34.99
  -4 -13  -1   20.53   32.92
   4 -13   2   86.82   39.95
   4  13   2   16.34   40.08
  -4  13  -2   75.47   34.02
  -4 -13  -2   22.04   36.34
   4 -13   3   88.65   53.65
   4  13   3   88.93   36.46
  -4  13  -3  100.37   31.77
  -4 -13  -3   26.08   34.09
   5   0 -19  -19.52   29.12
  -5   0  19  -13.54   25.25
   5   0 -18   -3.44   25.69
  -5   0  18    1.21   22.84
   5   0 -17  -10.52   23.08
  -5   0  17   -1.73   24.78
   5   0 -16  168.65   41.03
  -5   0  16  130.28   29.54
   5   0 -15    4.80   23.00
   5   0 -14   92.66   30.50
  -5   0  14  103.95   28.81
   5   0 -13  -14.49   18.08
  -5   0  13    9.43   12.62
   5   0 -12   73.00   19.86
  -5   0  12   14.13   20.16
   5   0 -11   -0.59   16.00
  -5   0  11   -2.73   11.28
   5   0 -10  307.94   27.82
  -5   0  10  317.53   28.82
   5   0  -9   -3.57    3.60
   5   0  -9  -13.66   14.42
  -5   0   9    4.55    9.50
   5   0  -8  291.02   11.60
   5   0  -8  326.85   24.33
  -5   0   8  228.29   22.81
   5   0  -7    2.24    4.00
  -5   0   7   -1.92    6.13
  -5   0   7    5.21    8.82
   5   0  -6  364.36   16.16
  -5   0   6  403.02   23.08
  -5   0   6  367.21   20.90
  -5   0   5    2.00    5.93
  -5   0   5    1.17    7.30
  -5   0   5   -2.74    5.31
  -5   0   4  745.19   25.81
  -5   0   4  728.70   27.36
  -5   0   4  725.69   25.08
  -5   0   3    2.40    5.74
  -5   0   3   10.29    7.52
  -5   0   2   27.47    6.78
  -5   0   2   26.32    7.63
  -5   0   2   50.84   10.12
  -5   0   1    4.16    6.14
  -5   0   1   -2.24    6.10
   5   0   0  701.55   22.76
  -5   0   0  651.55   28.44
  -5   0   0  630.61   25.36
   5   0   1   18.54    7.01
  -5   0  -1    5.38    8.01
  -5   0  -1    3.90    8.12
   5   0   2  296.73   16.69
  -5   0  -2  230.69   19.97
  -5   0  -2  274.37   16.74
  -5   0  -3   -2.42    9.14
  -5   0  -3   -4.09    8.51
   5   0   4  808.01   32.97
  -5   0  -4  799.51   35.55
  -5   0  -4  770.46   37.75
   5   0   5    2.12   11.68
  -5   0  -5   12.63   12.90
   5   0   6 1322.57   50.24
  -5   0  -6 1377.36   51.91
  -5   0  -6 1268.99   51.96
   5   0   7   36.29   14.94
  -5   0  -7   -8.54   14.66
  -5   0  -7   -1.17   15.90
   5   0   8    4.43   14.11
  -5   0  -8    2.63   15.85
   5   0   9    6.30   14.79
  -5   0  -9   -3.44   13.96
  -5   0  -9  -11.02   14.17
   5   0  10  256.58   29.05
  -5   0 -10  318.48   28.66
  -5   0 -10  231.36   37.31
   5   0  11    5.82   15.47
   5   0  11  -15.41   14.74
  -5   0 -11    8.86   19.55
   5   0  12  349.74   36.53
   5   0  12  284.94   39.67
  -5   0 -12  276.74   45.42
   5   0  13    8.20   15.80
   5   0  13    2.28   18.25
  -5   0 -13  -16.81   21.75
   5   0  14   69.39   34.04
  -5   0 -14  108.59   40.36
   5   1 -19   70.73   37.16
   5  -1 -19   30.58   31.00
  -5  -1  19   -5.43   33.33
   5  -1 -18    4.03   22.98
   5  -1 -17  -15.74   31.14
   5   1 -17   -9.09   30.10
  -5  -1  17   13.41   27.47
  -5   1  17   70.46   24.52
   5   1 -16   23.36   31.77
   5  -1 -16   78.79   31.61
  -5  -1  16   44.67   22.82
  -5   1  16   31.51   30.51
   5  -1 -15    3.58   26.75
   5   1 -15   69.02   27.93
  -5  -1  15   46.77   20.12
  -5   1  15   -8.30   20.82
   5   1 -14   70.20   25.42
   5  -1 -14   89.75   30.06
  -5   1  14  107.05   28.13
  -5  -1  14   84.94   23.24
   5   1 -13  146.24   32.77
   5  -1 -13  128.07   26.84
  -5  -1  13  155.46   29.05
  -5   1  13  179.00   29.40
   5   1 -12  263.63   35.25
   5  -1 -12  270.50   35.37
  -5   1  12  285.69   31.95
  -5  -1  12  222.86   26.07
   5  -1 -11  142.60   27.58
   5   1 -11  110.11   22.68
  -5  -1  11  124.48   21.42
  -5   1  11  150.04   20.85
   5   1 -10   93.98   22.23
   5  -1 -10   63.66   23.19
  -5   1  10   58.04   16.64
  -5  -1  10  100.86   20.98
   5  -1  -9  310.95   27.20
   5   1  -9  275.25   24.95
   5   1  -9  281.92    9.56
   5  -1  -9  305.99   13.99
  -5  -1   9  334.78   24.46
  -5   1   9  281.12   22.50
   5   1  -8   -2.16   10.56
   5   1  -8    4.32    4.05
   5  -1  -8    1.87    4.79
  -5  -1   8   12.56   10.89
  -5   1   8    5.11    6.98
  -5   1   8    0.69    7.90
   5   1  -7  491.94   26.75
   5  -1  -7  460.02   17.48
  -5  -1   7  461.55   15.91
  -5   1   7  460.87   29.94
  -5   1   7  429.74   22.67
  -5  -1   7  455.35   26.57
   5  -1  -6  136.92   11.65
  -5  -1   6  140.41   13.96
  -5  -1   6  128.24   10.65
  -5   1   6  157.97   18.42
  -5   1   6  134.91   12.27
   5  -1  -5  553.47   22.30
  -5  -1   5  571.14   27.01
  -5  -1   5  598.50   21.21
  -5  -1   5  602.07   24.46
  -5   1   5  574.69   22.20
  -5   1   5  563.24   28.19
   5  -1  -4   17.73    8.14
  -5   1   4   -4.82    5.35
  -5  -1   4   20.73    8.69
  -5   1   4   -6.17    9.61
  -5  -1   4   21.20    8.08
   5  -1  -3 1307.25   38.83
  -5   1   3 1299.10   29.56
  -5  -1   3 1404.82   37.16
  -5  -1   3 1325.41   36.40
  -5  -1   3 1309.47   36.05
  -5   1   3 1311.28   38.99
   5  -1  -2   70.35   11.42
  -5  -1   2  102.84   11.13
  -5  -1   2  101.85   11.12
  -5  -1   2   79.89   10.73
  -5   1   2   95.18    7.21
  -5   1   2  100.48   11.60
   5   1  -1  942.19   29.85
   5  -1  -1  939.89   21.45
  -5  -1   1  962.28   34.07
  -5  -1   1  931.97   26.82
  -5   1   1 1018.13   35.03
   5   1   0   52.99   10.82
   5  -1   0   55.80    6.57
  -5   1   0   24.54   10.10
  -5  -1   0   62.38    9.19
  -5   1   0   77.33   12.15
  -5  -1   0   45.92   12.89
   5   1   1  398.80   21.32
   5  -1   1  405.58   15.10
  -5   1  -1  385.29   22.92
  -5  -1  -1  391.98   17.21
  -5   1  -1  415.88   23.31
  -5  -1  -1  387.61   24.03
   5   1   2  120.89   15.44
   5  -1   2  113.37    9.36
  -5  -1  -2  127.81   15.94
  -5  -1  -2  120.37   12.53
  -5   1  -2  112.23   13.94
  -5   1  -2  100.94   17.83
   5   1   3 1358.82   44.14
   5  -1   3 1327.51   34.29
  -5  -1  -3 1343.80   40.22
  -5  -1  -3 1381.95   47.71
  -5   1  -3 1327.64   46.44
  -5   1  -3 1353.47   46.56
   5   1   4   45.40   15.82
   5  -1   4   38.13   11.14
  -5  -1  -4   59.52   15.69
  -5   1  -4   38.63   13.14
  -5   1  -4   84.07   14.49
  -5  -1  -4   58.11   13.28
   5   1   5 1062.19   44.54
   5  -1   5 1049.22   35.32
  -5   1  -5  989.89   42.44
  -5  -1  -5 1046.39   41.29
  -5   1  -5 1069.39   47.85
  -5  -1  -5  953.89   40.10
   5   1   6   41.64   12.90
   5  -1   6    0.03    9.51
  -5  -1  -6   -2.00   10.34
  -5  -1  -6  -15.59   11.49
  -5   1  -6   -2.08    6.93
  -5   1  -6   -3.77   12.74
   5   1   7  109.66   19.63
   5  -1   7   71.97   18.06
   5  -1   7   88.79   18.25
  -5  -1  -7  115.90   20.69
  -5  -1  -7   63.81   19.78
  -5   1  -7   60.20   19.89
   5  -1   8   87.40   22.35
   5   1   8   67.38   24.29
   5  -1   8  153.83   20.84
  -5  -1  -8   83.23   21.27
  -5  -1  -8   60.44   21.09
  -5   1  -8   85.08   26.62
   5   1   9  182.64   31.96
   5  -1   9  192.15   25.54
   5  -1   9  191.60   27.44
  -5  -1  -9  172.71   26.76
  -5   1  -9  202.71   28.72
  -5  -1  -9  188.19   27.80
   5   1  10   23.39   23.69
   5  -1  10   26.59   15.89
  -5  -1 -10   23.19   22.80
  -5  -1 -10    3.95   19.66
  -5   1 -10   72.23   25.89
   5   1  11  257.21   32.60
   5  -1  11  203.59   31.19
   5  -1  11  228.86   27.73
  -5  -1 -11  316.88   36.52
  -5  -1 -11  206.27   31.65
  -5   1 -11  155.24   40.93
   5   1  12  -17.70   16.88
   5  -1  12    6.22   17.73
   5  -1  12   13.56   15.37
  -5  -1 -12  -10.05   17.35
  -5   1 -12   -3.70   22.14
  -5  -1 -12   -8.30   21.70
   5   1  13   79.35   29.16
   5  -1  13   79.49   30.22
  -5  -1 -13  147.32   36.66
  -5   1 -13  102.39   39.63
   5   1  14  -22.39   23.24
   5  -1  14   11.63   26.77
  -5  -1 -14   62.99   25.55
  -5   1 -14   13.11   33.10
   5   2 -19   92.39   38.71
   5  -2 -19  113.91   40.70
  -5  -2  19   66.08   34.39
  -5   2  19  157.08   36.78
   5   2 -18   -9.10   22.38
  -5  -2  18   -8.11   25.53
  -5   2  18   26.00   21.83
   5   2 -17  236.21   40.68
   5  -2 -17  251.86   38.71
  -5  -2  17  228.32   37.28
  -5   2  17  261.03   39.78
   5   2 -16  129.78   36.76
   5  -2 -16  119.87   31.16
  -5  -2  16   89.09   27.04
  -5   2  16   92.09   28.55
   5   2 -15   -0.94   22.53
   5  -2 -15   47.76   23.19
  -5  -2  15   38.03   20.25
  -5   2  15   14.37   25.94
   5  -2 -14  -19.90   23.61
   5   2 -14   27.68   19.86
  -5   2  14   24.57   18.34
   5   2 -13  524.88   48.30
   5  -2 -13  501.52   42.89
  -5  -2  13  566.06   39.28
  -5   2  13  605.84   44.60
   5  -2 -12   25.36   19.67
   5   2 -12   66.86   24.60
  -5  -2  12   37.04   17.30
  -5   2  12   40.72   17.70
   5   2 -11  213.89   28.08
   5  -2 -11  227.96   27.20
  -5  -2  11  238.91   28.71
  -5   2  11  222.97   29.32
   5  -2 -10  107.87   12.05
   5  -2 -10  140.84   26.15
   5   2 -10  109.61   21.68
  -5  -2  10  119.08   18.49
  -5   2  10  107.61   22.46
   5   2  -9  257.21   27.51
   5  -2  -9  235.19   25.41
   5  -2  -9  232.56   14.61
  -5  -2   9  204.53    9.21
  -5   2   9  238.57   25.35
  -5  -2   9  249.80   25.28
   5   2  -8  113.90   17.42
   5  -2  -8  119.18   12.30
  -5   2   8  156.29   18.23
  -5  -2   8  129.86   19.30
  -5  -2   8  110.15    7.63
  -5   2   8  141.76   21.94
   5   2  -7  117.29   16.06
   5  -2  -7  144.04   14.11
  -5  -2   7  109.17   17.88
  -5  -2   7  149.70   10.27
  -5   2   7  108.59   17.11
  -5   2   7  155.44   14.31
   5   2  -6   50.15   13.39
   5  -2  -6   49.30   10.86
  -5  -2   6   55.68    8.48
  -5  -2   6   44.73   13.82
  -5   2   6   47.97   12.73
  -5   2   6   58.73   11.04
   5   2  -5  136.87   15.73
   5  -2  -5  124.49   14.39
  -5   2   5  165.15   15.06
  -5  -2   5  145.85   14.51
  -5  -2   5  134.11   12.04
  -5   2   5  151.96   12.13
   5  -2  -4   49.28   10.08
  -5  -2   4   22.76    7.35
  -5  -2   4   21.32    8.54
  -5   2   4   17.94    5.55
  -5   2   4   30.25   10.13
  -5  -2   4   23.78    8.34
   5  -2  -3  121.92   12.48
  -5  -2   3   98.39   11.72
  -5  -2   3  112.29   13.02
  -5  -2   3  125.96   11.42
  -5   2   3  113.06    6.95
  -5   2   3  106.38   12.73
   5   2  -2  539.90   23.47
   5  -2  -2  537.52   24.97
  -5  -2   2  579.88   25.52
  -5  -2   2  540.73   18.83
  -5   2   2  560.72   13.61
  -5   2   2  548.14   27.39
   5  -2  -1   75.48   14.99
   5   2  -1   81.34   12.38
   5  -2  -1   69.71    4.60
  -5  -2   1   99.90   13.49
  -5  -2   1   69.39    7.61
  -5   2   1   84.55   11.66
   5   2   0   95.55   13.77
   5  -2   0   92.08    4.90
   5  -2   0   91.96   14.33
  -5  -2   0   80.00   12.76
  -5  -2   0   95.11    8.06
  -5   2   0   84.93   13.18
   5  -2   1  205.32   19.84
   5  -2   1  165.48    7.08
   5   2   1  153.67   17.03
  -5  -2  -1  165.60   16.00
  -5  -2  -1  162.49   10.45
  -5   2  -1  124.19   17.86
   5   2   2  119.34   15.34
   5  -2   2   71.78   14.59
   5  -2   2   65.33    6.28
  -5  -2  -2   47.61   12.69
  -5  -2  -2   77.68    9.16
  -5   2  -2   55.06   15.50
   5  -2   3   -3.40   11.82
   5   2   3   17.41    9.67
   5  -2   3   -0.46    4.64
  -5  -2  -3    0.50    5.90
  -5   2  -3    2.00   10.10
  -5  -2  -3   36.85   11.55
   5   2   4  327.19   27.36
   5  -2   4  332.53   28.12
   5  -2   4  304.36   16.00
  -5  -2  -4  302.80   17.94
  -5  -2  -4  341.08   23.94
  -5   2  -4  315.15   28.69
   5   2   5   99.74   21.10
   5  -2   5   88.17   17.51
   5  -2   5   83.83   11.02
  -5  -2  -5  126.16   20.75
  -5  -2  -5   83.39   14.25
  -5   2  -5   45.81   20.73
   5  -2   6   58.34   12.14
   5   2   6   42.31   21.45
   5  -2   6   50.83   20.03
  -5  -2  -6   91.14   14.79
  -5  -2  -6   47.65   18.95
  -5   2  -6   74.89   22.45
   5  -2   7   43.89   19.71
   5  -2   7   22.77   13.03
  -5  -2  -7   54.80   15.68
  -5  -2  -7   19.82   17.11
  -5   2  -7   34.26   21.25
   5   2   8  201.94   31.33
   5  -2   8  157.21   26.71
   5  -2   8  175.96   19.49
  -5  -2  -8  203.17   23.26
  -5  -2  -8  163.95   25.02
  -5   2  -8  203.75   31.16
   5   2   9  245.23   34.03
   5  -2   9  201.32   28.80
   5  -2   9  259.07   24.74
  -5  -2  -9  217.76   28.88
  -5  -2  -9  163.59   27.05
  -5   2  -9  274.22   36.88
   5  -2  10  222.07   30.60
   5   2  10  241.66   38.52
   5  -2  10  206.01   27.00
  -5  -2 -10  194.19   30.61
  -5  -2 -10  243.53   29.86
  -5   2 -10  235.19   38.29
   5   2  11   82.59   31.60
   5  -2  11   80.86   21.94
   5  -2  11  104.67   24.72
  -5  -2 -11   58.72   26.86
  -5  -2 -11   68.68   24.73
  -5   2 -11   98.52   28.40
   5  -2  12   33.95   23.73
   5  -2  12   58.77   24.13
   5   2  12   73.42   26.85
  -5  -2 -12   64.02   28.01
  -5  -2 -12   76.21   25.48
  -5   2 -12   62.68   33.98
   5   2  13    6.78   24.61
   5  -2  13   21.26   22.67
  -5  -2 -13   12.73   25.15
  -5  -2 -13    6.96   22.51
  -5   2 -13   28.00   31.27
   5   2  14  -11.81   25.68
  -5   2 -14  -12.00   31.77
   5   3 -18  212.02   43.84
   5  -3 -18  179.00   43.96
  -5   3  18  252.57   42.08
  -5  -3  18  196.53   39.68
   5   3 -17  -23.99   21.85
   5  -3 -17   -9.46   22.14
  -5   3  17  -20.13   21.41
  -5  -3  17   30.51   20.47
   5   3 -16   86.85   31.62
   5  -3 -16  132.14   34.85
  -5  -3  16  161.93   30.04
  -5   3  16  138.71   33.23
   5  -3 -15   -8.11   25.48
  -5  -3  15  -21.57   22.25
  -5   3  15  -14.89   20.55
   5   3 -14  188.92   36.36
   5  -3 -14  125.70   29.84
  -5  -3  14  156.76   26.49
  -5   3  14  209.13   35.04
   5   3 -13    0.03   17.96
   5  -3 -13    6.38   17.16
  -5  -3  13    6.67   12.18
  -5   3  13  -22.40   16.57
   5   3 -12  572.85   45.71
   5  -3 -12  545.38   45.64
  -5   3  12  570.01   39.89
  -5  -3  12  558.00   37.52
   5  -3 -11   98.84   22.33
   5   3 -11  109.70   22.45
   5  -3 -11   81.27   12.68
  -5  -3  11  117.14   23.74
  -5   3  11   99.36   25.15
   5   3 -10  258.53   30.69
   5  -3 -10  222.42   31.67
   5  -3 -10  276.61   18.38
  -5   3  10  314.09   30.72
  -5  -3  10  285.02   29.26
   5   3  -9   44.72   16.50
   5  -3  -9   53.91   12.85
  -5  -3   9   46.72   15.73
  -5  -3   9   62.66    6.35
  -5   3   9   55.84   15.67
  -5   3   9   66.65   20.99
   5   3  -8  240.22   21.45
   5  -3  -8  237.78   18.29
  -5  -3   8  228.60   24.36
  -5  -3   8  222.43   12.03
  -5   3   8  299.91   23.51
  -5   3   8  226.57   23.37
   5   3  -7   96.32   14.16
   5  -3  -7  114.89   15.77
  -5  -3   7   88.01   14.83
  -5   3   7   95.92   14.73
  -5   3   7   92.86   18.87
  -5  -3   7   58.46    9.52
   5   3  -6  231.85   19.43
   5  -3  -6  215.13   18.39
  -5  -3   6  208.32   19.22
  -5  -3   6  215.96   14.36
  -5   3   6  237.75   16.78
  -5   3   6  246.18   19.55
   5   3  -5   80.46   12.22
   5  -3  -5   69.84   12.13
  -5  -3   5   81.23   15.74
  -5  -3   5   72.34   10.80
  -5   3   5   49.82    9.81
  -5   3   5   74.84   16.00
   5   3  -4  361.45   18.29
   5  -3  -4  332.72   22.50
  -5  -3   4  395.03   24.14
  -5  -3   4  377.84   19.92
  -5   3   4  342.36   24.36
  -5   3   4  365.57   13.92
   5   3  -3    9.31    5.81
   5  -3  -3   19.43   10.82
  -5  -3   3    6.39   10.72
  -5  -3   3    8.15    8.77
  -5   3   3   37.08   11.64
  -5   3   3    6.99    3.15
   5   3  -2  294.35   21.62
   5  -3  -2  274.81   21.74
  -5  -3   2  271.43   19.60
  -5  -3   2  276.72   12.25
  -5   3   2  265.75    7.22
  -5   3   2  271.14   21.19
   5   3  -1   13.98   12.62
   5  -3  -1   20.51   10.87
  -5  -3   1   23.01    9.34
  -5  -3   1   22.67    4.57
  -5   3   1   31.97   13.04
   5   3   0  119.82   17.87
   5  -3   0  126.00   16.32
  -5  -3   0  103.49   13.74
  -5  -3   0  136.34    7.45
  -5   3   0  106.05   15.41
   5   3   1   16.78   11.51
   5  -3   1   37.34   10.11
  -5  -3  -1    7.76   10.85
  -5  -3  -1    0.52    3.59
  -5   3  -1   12.37   12.38
   5  -3   2    8.86    2.30
   5   3   2   16.86   11.09
   5  -3   2   -0.09   10.77
  -5  -3  -2   19.11   10.28
  -5  -3  -2   16.99    5.11
  -5   3  -2   20.56   11.01
   5   3   3   -5.23   11.82
   5  -3   3   -0.11   11.32
   5  -3   3    5.97    3.42
  -5  -3  -3   -2.66   11.98
  -5  -3  -3   10.70    5.01
  -5   3  -3    6.36   13.91
   5   3   4   11.85   17.44
   5  -3   4   29.90   14.37
   5  -3   4   19.56    6.04
  -5  -3  -4   46.72   12.93
  -5  -3  -4   22.44    7.35
  -5   3  -4   38.05   14.32
   5   3   5   60.66   18.24
   5  -3   5   35.49    7.40
   5  -3   5   39.35   15.39
  -5  -3  -5   62.90   15.70
  -5   3  -5   55.37   20.22
  -5  -3  -5   28.30   10.15
   5   3   6   22.30   20.04
   5  -3   6   20.11    7.49
   5  -3   6  -11.94   15.65
  -5  -3  -6   14.71   15.37
  -5  -3  -6    5.05   10.35
  -5   3  -6   19.15   15.79
   5  -3   7  -10.60   11.51
   5  -3   7    9.85    6.99
  -5  -3  -7    4.06    9.35
  -5  -3  -7   -8.84   13.75
  -5   3  -7  -10.69   13.12
   5   3   8  109.57   30.52
   5  -3   8  120.57   20.51
   5  -3   8  127.37   15.41
  -5  -3  -8  113.04   16.86
  -5  -3  -8  120.93   20.40
  -5   3  -8  113.41   29.09
   5   3   9   56.82   25.30
   5  -3   9   33.88   15.37
   5  -3   9   45.07   15.15
  -5  -3  -9   15.06   19.36
  -5  -3  -9    8.96   16.70
  -5   3  -9    4.33   20.91
   5   3  10  224.42   40.73
   5  -3  10  372.84   33.14
   5  -3  10  258.70   27.69
  -5  -3 -10  271.14   29.03
  -5   3 -10  247.15   35.74
  -5  -3 -10  307.16   31.93
   5   3  11    2.21   23.30
   5  -3  11   39.76   15.86
  -5  -3 -11   21.21   19.89
  -5  -3 -11    0.20   19.93
  -5   3 -11    3.38   29.13
   5  -3  12  271.75   33.71
   5  -3  12  180.63   30.50
   5   3  12  259.82   45.90
  -5  -3 -12  207.15   33.88
  -5  -3 -12  154.32   32.03
  -5   3 -12  164.97   37.95
   5   3  13  -13.53   30.32
  -5  -3 -13   16.45   21.17
  -5   3 -13   11.71   25.28
   5   3  14   96.53   45.60
  -5   3 -14  148.35   39.57
   5   4 -18  -15.40   24.36
   5  -4 -18  -17.47   30.29
  -5  -4  18   10.74   21.83
  -5   4  18   39.96   29.59
   5  -4 -17  242.73   47.91
   5   4 -17  224.59   45.43
  -5  -4  17   81.48   33.53
  -5   4  17  227.61   45.01
   5   4 -16   78.00   33.06
   5  -4 -16   -2.95   26.30
  -5  -4  16   53.88   29.35
  -5   4  16   45.45   25.93
   5  -4 -15  197.78   40.92
   5   4 -15  234.96   36.05
  -5  -4  15  192.80   31.86
  -5   4  15  234.96   34.38
   5   4 -14  102.61   28.77
   5  -4 -14  133.12   29.07
  -5  -4  14  138.22   31.87
  -5   4  14  116.63   26.50
   5  -4 -13  136.06   28.84
   5   4 -13  167.74   29.21
  -5  -4  13  158.02   30.50
  -5   4  13  194.52   26.97
   5   4 -12  -16.21   19.50
   5  -4 -12   -4.00   16.30
  -5  -4  12   48.08   15.76
  -5   4  12   -4.31   17.63
   5   4 -11  229.67   29.87
   5  -4 -11  134.67   30.63
   5  -4 -11   91.04   15.14
  -5  -4  11  190.09   26.21
  -5   4  11  143.42   26.72
   5   4 -10   17.61   19.51
   5  -4 -10   17.84   11.83
  -5  -4  10   11.95    5.22
  -5   4  10   30.26   16.57
  -5   4  10   46.12   16.18
  -5  -4  10   25.58   13.97
   5   4  -9   40.08   16.46
   5  -4  -9   20.41   12.34
  -5  -4   9   -0.01    5.54
  -5  -4   9   10.92   16.33
  -5   4   9   37.41   12.13
  -5   4   9   23.40   17.47
   5   4  -8   74.06   19.31
   5  -4  -8   95.88   18.79
  -5  -4   8   74.92    9.28
  -5  -4   8   97.72   16.70
  -5   4   8   75.42   17.02
  -5   4   8   53.19   19.82
   5   4  -7   30.25   12.36
   5  -4  -7    7.80   13.56
  -5  -4   7   -0.95   13.64
  -5  -4   7    6.67    7.02
  -5   4   7    3.30    9.99
  -5   4   7    0.12   14.23
   5   4  -6  537.11   27.79
   5  -4  -6  550.35   33.08
  -5  -4   6  546.28   30.77
  -5  -4   6  550.92   23.56
  -5   4   6  488.05   23.49
  -5   4   6  536.54   34.12
   5   4  -5  109.66   13.70
   5  -4  -5  102.58   16.63
  -5  -4   5  125.39   14.91
  -5  -4   5   78.61   15.69
  -5   4   5  119.39   10.84
  -5   4   5   94.41   15.91
   5  -4  -4  126.74   19.30
   5   4  -4  111.64   11.21
  -5  -4   4  129.76   14.43
  -5  -4   4  110.68   15.83
  -5   4   4   98.93    7.89
  -5   4   4   98.03   17.53
   5   4  -3    5.80    4.57
   5  -4  -3    0.01    9.49
  -5  -4   3    1.47    8.83
  -5   4   3   -0.04    3.05
  -5   4   3   25.46    8.95
  -5  -4   3    0.12    9.19
   5   4  -2  166.73    8.55
   5   4  -2  177.42   18.61
   5  -4  -2  168.62   18.98
  -5  -4   2  143.37   18.46
  -5   4   2  152.56   17.29
   5   4  -1   33.64   12.60
   5   4  -1   28.77    4.42
   5  -4  -1   34.68   15.27
  -5  -4   1   17.42   12.95
  -5   4   1   26.31   11.57
   5   4   0  401.14   26.68
   5  -4   0  394.14   28.99
  -5  -4   0  379.14   26.67
  -5  -4   0  354.32    9.64
  -5   4   0  333.80   24.78
   5   4   1   10.71   13.17
   5  -4   1    8.28   13.60
  -5  -4  -1   27.67   10.52
  -5   4  -1    8.67   13.33
  -5  -4  -1   26.23    3.16
   5   4   2  653.75   35.27
   5  -4   2  695.31   35.36
  -5  -4  -2  582.51   14.02
  -5   4  -2  653.62   34.35
  -5  -4  -2  590.89   31.37
   5   4   3  197.59   22.84
   5  -4   3  167.13   21.62
  -5  -4  -3  147.32   21.41
  -5  -4  -3  133.16    7.71
  -5   4  -3  131.46   21.21
   5  -4   4   69.04   23.40
   5   4   4   98.03   21.27
  -5  -4  -4  108.27   20.38
  -5  -4  -4   82.61    8.45
  -5   4  -4  101.39   19.26
   5   4   5  176.10   28.31
   5  -4   5  157.25   25.65
   5  -4   5  115.37    9.42
  -5  -4  -5  136.21   11.43
  -5  -4  -5  192.88   23.82
  -5   4  -5  118.15   22.09
   5   4   6  207.30   32.82
   5  -4   6  132.46   27.27
   5  -4   6  166.84   11.52
  -5  -4  -6  168.54   21.88
  -5   4  -6  178.38   30.56
  -5  -4  -6  192.34   14.14
   5   4   7  183.90   27.84
   5  -4   7  217.22   25.63
   5  -4   7  162.44   13.65
  -5  -4  -7  172.98   15.80
  -5  -4  -7  189.80   27.19
  -5   4  -7  196.36   32.07
   5   4   8   16.07   23.98
   5  -4   8   18.17   19.41
   5  -4   8   -5.13   10.04
  -5  -4  -8   40.70   10.90
  -5  -4  -8   44.78   19.11
  -5   4  -8   15.74   18.71
   5   4   9  200.27   37.73
   5  -4   9  132.97   28.02
   5  -4   9  151.47   19.47
  -5  -4  -9  148.27   30.03
  -5   4  -9  167.43   30.87
  -5  -4  -9  189.00   19.60
   5   4  10   -6.00   25.97
   5  -4  10   64.28   19.69
   5  -4  10    0.40   13.33
  -5  -4 -10    4.83   16.17
  -5   4 -10  -11.90   20.81
   5   4  11  138.42   31.52
   5  -4  11   94.07   27.15
  -5  -4 -11   80.55   29.11
  -5   4 -11  105.26   32.50
   5   4  12   77.04   36.42
   5  -4  12   46.00   23.76
  -5  -4 -12   69.67   25.65
  -5   4 -12   -3.51   36.85
   5   4  13   74.64   40.14
  -5  -4 -13   53.91   28.22
  -5   4 -13   51.74   39.14
   5   5 -17   25.84   27.02
   5  -5 -17  -12.15   32.50
  -5  -5  17   44.27   24.66
  -5   5  17    3.32   25.40
   5   5 -16   47.17   34.42
   5  -5 -16   60.05   33.47
  -5  -5  16   77.06   32.60
  -5   5  16   66.45   33.70
   5  -5 -15  -13.70   23.43
   5   5 -15   24.26   19.40
  -5  -5  15   -5.29   18.45
  -5   5  15    4.55   21.93
   5   5 -14   79.24   31.21
   5  -5 -14  118.10   26.79
  -5  -5  14   58.41   23.95
  -5   5  14   32.67   23.07
   5   5 -13   96.28   26.74
   5  -5 -13  131.84   26.92
  -5  -5  13  123.32   29.07
  -5   5  13  117.56   26.14
   5   5 -12   80.90   27.02
   5  -5 -12   62.18   27.30
   5  -5 -12   70.42   17.16
  -5  -5  12   77.58   20.88
  -5   5  12   88.45   21.06
   5   5 -11    3.39   17.28
   5  -5 -11   34.62   23.81
   5  -5 -11   48.42   14.61
  -5  -5  11   23.07   20.75
  -5   5  11   39.73   16.44
   5   5 -10  108.33   24.84
   5  -5 -10   96.82   19.36
  -5  -5  10  126.32   21.36
  -5   5  10  124.32   23.35
  -5   5  10  115.89   26.24
  -5  -5  10   93.93   10.18
   5   5  -9  112.53   21.00
   5  -5  -9   87.37   22.30
  -5  -5   9   61.48   10.14
  -5  -5   9   56.06   21.65
  -5   5   9   69.44   18.57
  -5   5   9   83.38   22.95
   5  -5  -8   88.17   23.94
   5   5  -8  139.72   21.07
  -5  -5   8  115.29   19.25
  -5  -5   8   97.61   12.49
  -5   5   8   84.13   18.79
  -5   5   8   84.25   20.77
   5   5  -7  422.03   28.58
   5  -5  -7  414.60   34.67
  -5  -5   7  397.79   33.17
  -5  -5   7  436.80   23.73
  -5   5   7  382.99   31.82
  -5   5   7  394.57   24.96
   5   5  -6  305.35   21.79
   5  -5  -6  334.20   30.39
  -5  -5   6  283.13   25.35
  -5   5   6  285.54   20.09
  -5   5   6  319.02   28.95
  -5  -5   6  282.12   21.09
   5   5  -5  282.67   18.07
   5  -5  -5  315.18   30.60
  -5  -5   5  272.11   27.27
  -5  -5   5  308.32   22.02
  -5   5   5  285.68   15.58
  -5   5   5  282.40   26.20
   5   5  -4   88.56   10.72
   5  -5  -4   48.78   21.33
  -5  -5   4   61.57   15.33
  -5  -5   4   56.52   17.23
  -5   5   4   75.41    8.74
  -5   5   4   96.31   16.03
   5   5  -3  226.63   25.08
   5  -5  -3  207.98   23.81
   5   5  -3  191.48   11.74
  -5  -5   3  227.65   18.44
  -5   5   3  198.10    9.16
  -5   5   3  224.43   21.52
   5   5  -2   55.67    5.63
   5   5  -2   47.06   15.66
   5  -5  -2   67.63   20.05
  -5  -5   2   71.11   13.29
  -5   5   2   33.90   13.88
   5   5  -1  847.48   41.41
   5  -5  -1  904.05   42.69
  -5  -5   1  916.66   39.01
  -5   5   1  901.01   40.20
   5   5   0  297.96   27.06
   5  -5   0  290.14   26.78
  -5   5   0  281.57   27.30
  -5  -5   0  313.29   26.68
   5   5   1 1072.46   50.37
   5  -5   1 1059.49   50.56
  -5  -5  -1 1084.02   44.56
  -5   5  -1 1040.46   50.35
   5   5   2   76.05   24.42
   5  -5   2  107.72   20.34
  -5   5  -2  102.95   19.51
  -5  -5  -2  109.55   17.89
   5   5   3  560.98   36.90
   5  -5   3  572.80   36.52
  -5  -5  -3  584.47   34.22
  -5   5  -3  556.92   35.91
   5   5   4   14.74   23.56
   5  -5   4   47.40   21.51
  -5   5  -4   61.55   18.84
  -5  -5  -4   42.66   16.02
   5   5   5  590.43   46.01
   5  -5   5  530.10   41.21
  -5  -5  -5  540.21   35.35
  -5   5  -5  565.18   40.85
   5   5   6   19.95   24.49
   5  -5   6   22.29   20.34
  -5  -5  -6   52.69   19.56
  -5   5  -6   22.65   23.30
   5   5   7  151.03   29.00
   5  -5   7  211.37   30.46
  -5  -5  -7  182.45   27.99
  -5   5  -7  208.99   34.73
   5   5   8   68.15   25.44
   5  -5   8   42.29   24.14
  -5   5  -8   89.77   24.53
  -5  -5  -8   51.01   19.26
   5   5   9   77.74   34.50
   5  -5   9   95.88   23.25
  -5  -5  -9  126.46   27.57
  -5   5  -9   81.52   32.60
   5   5  10   62.24   27.18
   5  -5  10    8.35   18.84
  -5  -5 -10   44.63   22.47
   5   5  11   50.39   35.35
   5  -5  11   20.65   25.18
  -5  -5 -11   82.59   25.93
  -5   5 -11   17.25   28.11
   5   5  12   31.97   29.99
   5  -5  12   63.12   25.17
  -5   5 -12   16.86   35.00
  -5  -5 -12    3.13   25.30
   5   5  13  -13.75   32.67
  -5   5 -13   24.05   31.00
   5   6 -17   20.59   21.11
   5  -6 -17   12.79   24.75
  -5  -6  17  -14.02   22.87
  -5   6  17  -28.66   24.87
   5   6 -16    8.44   31.39
   5  -6 -16   -9.47   25.03
  -5  -6  16   52.75   23.34
  -5   6  16    9.50   28.01
   5   6 -15   -5.15   16.96
   5  -6 -15    4.87   20.62
  -5   6  15    0.88   15.62
   5   6 -14   15.53   22.47
   5  -6 -14   54.71   26.80
  -5  -6  14   23.07   25.03
  -5   6  14   -9.82   24.78
   5   6 -13   -2.78   25.02
   5  -6 -13   39.28   25.96
  -5   6  13   24.69   23.62
   5   6 -12   51.29   25.21
   5  -6 -12   28.19   21.32
   5  -6 -12   54.43   18.34
  -5  -6  12   10.75   24.39
  -5   6  12   35.74   19.32
   5   6 -11  -11.64   16.81
   5  -6 -11    4.72   13.06
  -5  -6  11  -14.53   16.65
  -5   6  11    4.32   16.22
   5   6 -10    6.61   15.69
   5  -6 -10   47.59   20.77
  -5  -6  10   45.45   17.50
  -5  -6  10   19.65    9.42
  -5   6  10   50.51   18.55
  -5   6  10   46.84   17.76
   5   6  -9   34.09   17.21
   5  -6  -9   52.07   20.45
  -5  -6   9   39.56   19.24
  -5  -6   9   17.63   11.38
  -5   6   9   17.44   16.67
  -5   6   9    4.87   20.17
   5   6  -8  276.04   25.98
   5  -6  -8  209.44   34.52
  -5  -6   8  230.27   21.71
  -5   6   8  285.34   26.06
  -5   6   8  243.53   29.79
  -5  -6   8  306.92   31.57
   5   6  -7   10.19   13.44
   5  -6  -7   16.68   21.50
  -5  -6   7   15.29   18.46
  -5  -6   7   61.88   13.85
  -5   6   7    5.75   13.65
  -5   6   7   32.29   15.07
   5   6  -6  234.04   18.10
   5  -6  -6  250.86   33.85
  -5  -6   6  196.71   28.14
  -5  -6   6  259.91   22.50
  -5   6   6  221.87   18.15
  -5   6   6  207.65   27.33
   5   6  -5   56.52   10.72
   5  -6  -5   82.28   25.12
  -5  -6   5   84.53   16.40
  -5   6   5   84.28   20.16
  -5   6   5   58.03   10.37
  -5  -6   5   59.76   17.40
   5   6  -4  160.11   11.62
   5  -6  -4  169.40   30.51
  -5  -6   4  154.78   21.74
  -5   6   4  176.19   11.53
  -5   6   4  163.92   24.21
   5   6  -3  134.08    8.98
   5   6  -3  130.28   21.77
   5  -6  -3  144.68   29.00
  -5  -6   3  108.83   17.26
  -5   6   3  111.98    8.70
  -5   6   3  143.73   23.66
   5   6  -2  484.77   36.15
   5  -6  -2  444.20   38.10
  -5  -6   2  407.86   28.48
  -5   6   2  380.75   28.20
   5   6  -1   75.03   19.98
   5  -6  -1   70.28   24.92
  -5  -6   1  115.23   17.39
  -5   6   1   56.87   20.74
   5   6   0  972.42   52.09
   5  -6   0  871.52   50.98
  -5  -6   0  852.85   44.49
  -5   6   0  890.85   46.20
   5   6   1   13.29   15.96
   5  -6   1   15.71   16.58
  -5  -6  -1   13.25   13.23
  -5   6  -1   17.07   14.28
   5   6   2  367.69   38.00
   5  -6   2  344.76   35.63
  -5   6  -2  347.89   35.30
  -5  -6  -2  430.13   30.46
   5   6   3   93.33   22.80
   5  -6   3    5.23   21.67
  -5  -6  -3   23.70   15.44
  -5   6  -3   16.45   16.80
   5   6   4  179.36   33.34
   5  -6   4  122.88   26.49
  -5  -6  -4  136.56   21.89
  -5   6  -4  159.86   29.28
   5   6   5    9.09   18.61
   5  -6   5   -9.13   16.50
  -5  -6  -5    3.98   11.92
   5   6   6  153.58   31.64
   5  -6   6  184.75   32.24
  -5   6  -6  191.60   33.98
  -5  -6  -6  251.62   30.10
   5   6   7    7.90   21.59
   5  -6   7    9.88   18.54
  -5  -6  -7    6.02   12.80
  -5   6  -7  -18.25   19.37
   5   6   8  103.85   38.06
   5  -6   8  156.27   32.70
  -5  -6  -8  141.20   29.25
  -5   6  -8  172.75   30.81
   5   6   9   79.05   29.64
   5  -6   9   -1.42   18.07
  -5  -6  -9   14.88   18.41
  -5   6  -9   12.12   22.44
   5   6  10  136.09   36.46
   5  -6  10   95.50   32.57
  -5  -6 -10  184.98   32.81
  -5   6 -10  186.03   35.19
   5   6  11   33.50   32.19
   5  -6  11   -8.07   19.89
  -5  -6 -11   57.57   25.99
  -5   6 -11   10.69   27.12
   5   6  12  172.65   40.63
  -5  -6 -12  127.89   35.87
  -5   6 -12  139.85   44.85
   5   7 -16   84.87   36.20
   5  -7 -16   30.02   29.37
  -5  -7  16   15.35   34.38
  -5   7  16   37.49   35.54
   5   7 -15  -18.52   23.67
   5  -7 -15   17.26   23.74
  -5   7  15  -12.56   18.38
  -5  -7  15   17.09   17.97
   5   7 -14   24.05   27.69
   5  -7 -14   40.11   27.42
  -5  -7  14    4.41   21.99
  -5   7  14   31.76   26.93
   5   7 -13   21.91   20.36
   5  -7 -13    2.76   25.31
  -5  -7  13   23.61   24.24
  -5   7  13    3.10   20.18
   5   7 -12   52.43   27.34
   5  -7 -12   55.92   25.66
   5  -7 -12   54.08   23.97
  -5  -7  12   57.96   27.99
  -5   7  12   62.23   26.80
   5   7 -11   53.59   24.68
   5  -7 -11   69.23   25.29
  -5  -7  11   63.60   22.30
  -5   7  11  100.06   25.62
  -5   7  11   31.60   22.62
   5   7 -10  110.12   25.70
   5  -7 -10   97.87   28.93
  -5  -7  10  104.93   27.91
  -5  -7  10  100.18   15.82
  -5   7  10   75.32   23.16
  -5   7  10  122.44   28.60
   5   7  -9  113.89   21.98
   5  -7  -9   87.00   29.12
  -5  -7   9   61.27   16.61
  -5  -7   9   84.14   21.64
  -5   7   9   96.71   21.70
  -5   7   9   53.73   24.21
   5   7  -8   -1.38   14.79
   5  -7  -8   59.97   23.93
  -5  -7   8   -2.43   14.48
  -5   7   8   48.93   19.65
  -5   7   8   35.22   15.19
  -5  -7   8   -4.54   19.46
   5   7  -7  257.32   24.42
   5  -7  -7  247.31   39.37
  -5  -7   7  264.36   33.16
  -5  -7   7  235.36   26.16
  -5   7   7  279.57   24.94
  -5   7   7  292.93   27.13
   5   7  -6   11.10   12.85
   5  -7  -6   40.63   27.64
  -5  -7   6   56.31   21.15
  -5  -7   6   23.54   17.35
  -5   7   6   73.65   14.14
  -5   7   6   49.83   19.57
   5   7  -5  168.33   14.48
   5  -7  -5  178.53   35.82
  -5  -7   5  172.90   24.93
  -5  -7   5  182.17   24.92
  -5   7   5  193.39   15.95
  -5   7   5  181.54   27.20
   5   7  -4   85.23   10.50
   5   7  -4   44.34   20.34
   5  -7  -4   85.02   30.66
  -5  -7   4   86.92   21.47
  -5   7   4   97.01   10.38
  -5   7   4  102.98   18.54
   5   7  -3  266.77   28.88
   5  -7  -3  226.66   37.86
  -5  -7   3  241.65   24.92
  -5   7   3  230.82   13.21
  -5   7   3  307.42   30.13
   5  -7  -2   78.51   27.13
   5   7  -2  124.56   21.91
  -5  -7   2  106.81   19.16
  -5   7   2   95.15   23.23
   5   7  -1  772.17   46.58
   5  -7  -1  789.64   49.71
  -5  -7   1  841.13   46.65
  -5   7   1  847.32   47.56
   5   7   0   47.02   19.61
  -5  -7   0   33.52   18.50
  -5   7   0   -6.20   18.81
   5   7   1  257.82   30.97
   5  -7   1  297.82   37.69
  -5  -7  -1  248.25   30.77
  -5   7  -1  328.79   28.77
   5   7   2   90.01   23.49
   5  -7   2  106.38   28.90
  -5  -7  -2   90.67   20.61
  -5   7  -2   77.01   25.81
   5   7   3  300.36   38.69
   5  -7   3  430.63   40.44
  -5  -7  -3  318.24   30.22
  -5   7  -3  300.58   31.15
   5   7   4  125.76   30.15
   5  -7   4  100.24   24.80
  -5  -7  -4   61.26   19.98
  -5   7  -4   47.08   25.77
   5   7   5  236.68   34.51
   5  -7   5  293.60   38.24
  -5  -7  -5  304.14   30.01
  -5   7  -5  239.27   33.75
   5  -7   6   23.38   25.86
   5   7   6   27.84   22.58
  -5  -7  -6   53.24   22.21
  -5   7  -6   19.30   20.79
   5   7   7  217.54   39.37
   5  -7   7  151.34   36.28
  -5  -7  -7  168.46   32.42
  -5   7  -7  146.84   31.39
   5  -7   8   13.32   27.92
   5   7   8   66.41   32.79
  -5  -7  -8   53.34   25.33
  -5   7  -8   18.72   28.78
   5   7   9   49.99   31.40
   5  -7   9   79.44   31.00
  -5  -7  -9   96.56   25.64
  -5   7  -9   95.68   30.58
   5   7  10   -1.77   33.04
   5  -7  10   52.39   27.57
  -5  -7 -10    4.21   25.10
  -5   7 -10   12.74   24.91
   5   7  11   -1.04   33.17
   5  -7  11   51.34   31.27
  -5  -7 -11  132.65   31.42
  -5   7 -11   43.70   31.60
   5   7  12    4.36   30.30
  -5  -7 -12  -10.05   22.29
  -5   7 -12   15.62   27.73
   5   8 -15   37.57   31.52
   5  -8 -15   20.94   35.96
  -5  -8  15   82.15   36.53
  -5   8  15  118.45   38.65
   5   8 -14    3.45   30.82
   5  -8 -14    7.94   28.54
  -5  -8  14    7.17   30.18
  -5   8  14   74.49   29.44
   5   8 -13  171.98   31.81
   5  -8 -13  143.61   38.74
  -5  -8  13  148.28   31.81
  -5   8  13  116.86   30.70
   5   8 -12   54.42   23.48
   5  -8 -12   15.74   20.97
  -5  -8  12   -5.93   20.50
  -5   8  12   -9.72   22.59
   5   8 -11  119.49   30.33
   5  -8 -11  140.16   32.83
  -5  -8  11  142.43   28.45
  -5   8  11  135.66   25.21
  -5   8  11  145.37   31.86
   5   8 -10   10.51   13.64
   5  -8 -10  -10.61   17.42
  -5  -8  10   -7.07   15.93
  -5  -8  10    8.45   12.99
  -5   8  10   22.20   16.51
  -5   8  10  -11.32   19.54
   5   8  -9  107.60   23.12
   5  -8  -9  124.66   34.31
  -5  -8   9  156.80   30.45
  -5  -8   9   67.53   22.76
  -5   8   9  165.15   24.73
  -5   8   9  102.53   24.17
   5   8  -8  111.79   21.25
   5  -8  -8   92.15   33.65
  -5  -8   8  117.17   22.78
  -5   8   8   89.81   20.33
  -5   8   8   72.11   25.26
  -5  -8   8   86.83   29.01
   5   8  -7  156.21   21.19
   5  -8  -7  197.85   33.81
  -5  -8   7  173.73   26.96
  -5  -8   7  147.88   25.05
  -5   8   7  186.45   23.04
  -5   8   7  142.31   27.77
   5   8  -6  118.43   15.17
   5  -8  -6  185.19   36.90
  -5  -8   6  130.17   25.01
  -5  -8   6   92.21   24.45
  -5   8   6  129.28   16.21
  -5   8   6  122.49   25.59
   5   8  -5   30.50   10.70
   5   8  -5   88.57   25.14
   5  -8  -5   57.90   30.08
  -5  -8   5   57.31   20.55
  -5   8   5   43.56   12.38
  -5   8   5   49.41   21.53
   5   8  -4   59.13   25.87
   5  -8  -4   51.63   24.97
  -5  -8   4   45.58   22.16
  -5   8   4   52.99   10.16
  -5   8   4   72.53   21.41
   5   8  -3   87.11   22.28
   5  -8  -3   95.28   30.96
  -5  -8   3   34.42   18.78
  -5   8   3   61.65   22.79
   5   8  -2  146.78   30.79
   5  -8  -2   98.30   29.89
  -5  -8   2  175.56   24.19
  -5   8   2  132.61   25.64
   5   8  -1  -16.58   14.03
  -5  -8   1   19.72   12.02
  -5   8   1  -14.96   15.02
   5   8   0   88.16   27.88
   5  -8   0   89.55   32.11
  -5  -8   0   93.89   24.13
  -5   8   0   64.99   19.74
   5   8   1   38.72   19.79
   5  -8   1   28.50   22.37
  -5  -8  -1   37.44   17.19
  -5   8  -1   19.15   17.50
   5   8   2   17.64   24.91
   5  -8   2  -20.29   21.53
  -5  -8  -2   50.36   17.03
  -5   8  -2   47.43   18.65
   5   8   3   -1.47   19.59
   5  -8   3   49.03   20.95
  -5  -8  -3   -7.77   21.08
  -5   8  -3   29.04   17.79
   5   8   4   87.65   30.73
   5  -8   4   33.73   25.68
  -5  -8  -4  106.85   26.49
  -5   8  -4   63.08   23.52
   5   8   5   90.81   30.70
   5  -8   5   27.13   25.02
  -5  -8  -5   53.98   24.89
  -5   8  -5   19.94   26.56
   5   8   6   86.59   30.84
   5  -8   6   70.16   34.59
  -5  -8  -6  104.40   25.29
  -5   8  -6  103.89   27.56
   5   8   7   48.06   32.35
   5  -8   7   67.06   31.81
  -5  -8  -7   53.65   26.24
  -5   8  -7    0.98   25.16
   5   8   8  177.65   45.70
   5  -8   8  189.08   35.38
  -5  -8  -8  172.66   36.37
  -5   8  -8  173.85   42.41
   5   8   9   56.15   33.92
   5  -8   9   49.65   34.80
  -5  -8  -9  101.65   31.66
  -5   8  -9  114.05   37.75
   5   8  10   44.76   37.74
   5  -8  10   26.76   32.05
  -5  -8 -10   31.01   23.66
  -5   8 -10  -11.27   32.40
   5   8  11   26.57   32.19
  -5  -8 -11   29.73   30.36
  -5   8 -11    8.84   35.29
   5   9 -14  132.11   38.37
   5  -9 -14  108.04   40.26
  -5  -9  14   79.53   32.25
  -5   9  14  119.65   39.67
   5   9 -13   29.93   25.19
   5  -9 -13   -6.96   21.17
  -5   9  13    7.52   25.28
   5   9 -12  106.03   33.64
   5  -9 -12  126.22   37.39
   5  -9 -12  197.88   36.04
  -5  -9  12  196.17   37.80
  -5   9  12   81.96   31.38
   5   9 -11   30.77   25.96
   5  -9 -11   94.77   29.80
  -5  -9  11   47.57   28.51
  -5   9  11   16.16   27.01
  -5   9  11   25.14   27.83
   5   9 -10  151.43   29.79
   5  -9 -10  243.84   42.55
  -5  -9  10  172.57   39.01
  -5  -9  10  162.51   27.94
  -5   9  10  183.96   33.55
  -5   9  10  228.62   37.11
   5   9  -9   68.28   21.12
   5  -9  -9  109.57   35.02
  -5  -9   9   45.62   24.00
  -5  -9   9   14.01   22.31
  -5   9   9   72.86   23.14
  -5   9   9   12.64   25.90
   5   9  -8  270.26   28.45
   5  -9  -8  205.53   49.12
  -5  -9   8  327.87   35.51
  -5  -9   8  298.20   36.07
  -5   9   8  271.05   30.78
  -5   9   8  316.47   34.40
   5   9  -7   -8.33   10.80
   5  -9  -7   -9.91   26.65
  -5  -9   7   -6.54   14.77
  -5  -9   7   13.26   12.27
  -5   9   7   -2.69   12.72
  -5   9   7   72.72   18.81
   5   9  -6  396.85   43.86
   5  -9  -6  314.08   50.96
  -5  -9   6  426.32   35.46
  -5   9   6  372.58   26.67
  -5   9   6  368.14   37.85
   5  -9  -5  -19.10   25.65
   5   9  -5    7.60   16.73
  -5  -9   5  -14.83   18.00
  -5   9   5   -9.03   16.68
  -5   9   5   14.88    9.26
   5   9  -4  101.34   25.91
   5  -9  -4  125.36   31.83
  -5  -9   4  113.10   25.10
  -5   9   4   86.48   25.30
   5   9  -3   52.85   28.84
   5  -9  -3  150.72   35.29
  -5  -9   3   28.81   24.35
  -5   9   3   70.73   24.90
   5   9  -2   20.20   19.15
   5  -9  -2   11.03   25.94
  -5  -9   2   17.67   19.72
  -5   9   2   -8.05   18.40
   5  -9  -1   62.96   30.53
   5   9  -1   22.49   21.79
  -5  -9   1   46.10   19.59
  -5   9   1   10.15   18.19
   5   9   0   24.51   23.66
   5  -9   0    1.48   23.22
  -5  -9   0   20.63   17.73
  -5   9   0   17.64   20.23
   5   9   1  128.24   34.33
   5  -9   1  114.90   30.60
  -5  -9  -1  127.39   28.51
  -5   9  -1   86.87   24.06
   5   9   2   73.43   27.46
   5  -9   2   59.47   30.22
  -5  -9  -2  -13.43   22.86
  -5   9  -2   39.81   24.38
   5  -9   3  -20.67   22.44
   5   9   3   44.01   21.14
  -5  -9  -3   28.51   17.86
  -5   9  -3    0.77   19.00
   5   9   4   54.81   26.26
   5  -9   4   53.48   28.05
  -5  -9  -4   40.12   22.02
  -5   9  -4   87.67   29.18
   5   9   5    8.93   23.96
   5  -9   5    1.17   30.07
  -5  -9  -5   83.06   21.21
  -5   9  -5  -21.06   25.47
   5   9   6   73.02   36.98
   5  -9   6   51.47   34.13
  -5  -9  -6   60.81   24.28
  -5   9  -6   79.86   31.73
   5  -9   7   93.75   36.84
   5   9   7   50.40   38.98
  -5  -9  -7   76.02   32.01
  -5   9  -7   52.70   34.39
   5   9   8   13.63   30.92
   5  -9   8  115.39   30.73
  -5  -9  -8   57.10   30.55
  -5   9  -8   31.48   29.57
   5   9   9  105.46   38.05
   5  -9   9   31.15   32.75
  -5  -9  -9   -9.29   28.35
  -5   9  -9  -12.12   34.06
   5   9  10   72.45   41.37
   5  -9  10   96.25   35.12
  -5  -9 -10   90.16   30.71
  -5   9 -10  127.53   43.23
   5 -10 -13    5.88   26.62
  -5 -10  13    5.02   26.01
  -5  10  13  103.92   33.13
   5  10 -12   98.15   31.05
   5 -10 -12   23.36   32.80
   5 -10 -12   30.74   33.94
  -5 -10  12   40.43   35.73
  -5  10  12   12.29   31.79
   5  10 -11   85.36   31.85
   5 -10 -11  130.30   41.83
  -5 -10  11  143.44   37.79
  -5  10  11  101.82   34.06
  -5  10  11  134.10   35.66
   5  10 -10   -5.74   19.51
  -5 -10  10   42.47   24.14
  -5 -10  10    4.39   29.61
  -5  10  10   61.55   25.74
  -5  10  10   61.53   27.81
   5 -10  -9  172.56   45.20
  -5 -10   9  175.11   33.91
  -5  10   9  182.93   30.48
  -5  10   9  127.06   32.06
  -5 -10   9   85.47   31.90
   5  10  -8  -13.86   19.69
   5 -10  -8    5.72   29.28
  -5 -10   8   -7.43   21.37
  -5  10   8   -6.21   14.89
  -5  10   8   -9.14   16.07
   5  10  -7  117.00   30.94
   5 -10  -7  117.79   43.60
  -5 -10   7  137.07   33.60
  -5  10   7  160.85   24.43
  -5  10   7  141.21   26.85
   5  10  -6   28.56   24.91
   5 -10  -6   47.09   36.45
  -5 -10   6   78.32   27.99
  -5  10   6   54.82   20.30
   5 -10  -5  109.82   33.87
   5  10  -5   17.30   31.08
  -5 -10   5   85.17   30.13
  -5  10   5   69.05   21.99
   5  10  -4  169.46   33.33
   5 -10  -4  209.48   49.00
  -5 -10   4  233.51   38.42
  -5  10   4  221.28   32.45
   5  10  -3   36.69   22.87
   5 -10  -3   21.89   28.58
  -5 -10   3  -16.46   17.18
  -5  10   3    1.20   18.91
   5  10  -2  168.30   38.78
   5 -10  -2  103.64   43.35
  -5 -10   2  185.34   29.85
  -5  10   2  143.22   27.05
   5 -10  -1   20.07   28.71
  -5 -10   1   29.56   22.27
  -5  10   1   55.45   24.82
   5  10   0  136.60   31.83
   5 -10   0  106.52   44.55
  -5 -10   0  148.12   34.68
  -5  10   0  202.98   33.38
   5  10   1    1.83   20.95
   5 -10   1    0.85   22.95
  -5 -10  -1   17.46   23.37
  -5  10  -1   12.46   16.86
   5  10   2   75.27   28.74
   5 -10   2   63.04   30.79
  -5 -10  -2   51.19   24.91
  -5  10  -2   86.10   30.16
   5 -10   3   93.82   37.74
   5  10   3   77.71   29.59
  -5 -10  -3   37.30   23.84
  -5  10  -3   35.36   29.41
   5  10   4  136.31   39.51
   5 -10   4  141.30   43.32
  -5 -10  -4   67.12   33.00
  -5  10  -4  105.31   36.06
   5 -10   5   30.64   34.12
   5  10   5   43.43   30.84
  -5 -10  -5   33.58   26.71
  -5  10  -5  -16.40   30.09
   5  10   6   59.58   30.19
   5 -10   6   12.85   39.49
  -5 -10  -6   65.50   30.78
  -5  10  -6   46.20   27.51
   5 -10   7    3.52   40.27
   5  10   7   23.24   39.07
  -5 -10  -7   64.73   25.97
  -5  10  -7   72.41   28.46
   5  10   8   19.33   34.68
   5 -10   8  138.91   43.78
  -5 -10  -8   41.97   32.67
   5 -11 -11  -18.69   25.52
  -5 -11  11   14.44   21.02
  -5  11  11   -4.87   21.72
   5 -11 -10   24.50   32.28
  -5 -11  10   12.23   16.40
  -5  11  10   -0.98   20.85
   5  11  -9  139.41   35.74
   5 -11  -9   82.40   34.98
  -5 -11   9   17.15   30.25
  -5  11   9    8.33   30.49
   5 -11  -8   50.95   37.50
   5  11  -8   55.29   31.45
  -5 -11   8  133.54   34.81
  -5  11   8  122.81   30.45
   5  11  -7   72.94   36.65
   5 -11  -7   61.45   36.04
  -5 -11   7   70.39   26.80
  -5  11   7   76.20   28.65
   5 -11  -6   34.46   36.43
   5  11  -6   36.51   32.26
  -5 -11   6   61.01   27.57
  -5  11   6   -7.06   20.31
   5  11  -5   79.69   38.30
   5 -11  -5  147.12   39.50
  -5 -11   5  129.24   36.34
  -5  11   5   64.01   30.96
   5 -11  -4   80.99   30.83
   5  11  -4    8.37   23.90
  -5 -11   4   -6.85   22.31
  -5  11   4   22.42   22.86
   5  11  -3  173.51   42.71
   5 -11  -3  189.21   43.00
  -5 -11   3  154.75   40.23
  -5  11   3  144.79   27.98
   5  11  -2   -3.85   25.50
   5 -11  -2   83.28   35.23
  -5 -11   2   16.83   27.35
  -5  11   2    4.18   24.97
   5  11  -1  122.95   41.01
   5 -11  -1  156.39   49.91
  -5 -11   1  122.45   37.65
  -5  11   1  159.72   34.99
   5 -11   0  -33.79   28.24
   5  11   0   42.51   21.12
  -5 -11   0  -22.88   18.37
  -5  11   0   16.91   21.04
   5  11   1  105.74   40.69
   5 -11   1  107.49   38.90
  -5 -11  -1   69.60   29.77
  -5  11  -1  122.35   34.50
   5 -11   2   24.65   35.94
   5  11   2   -4.98   32.86
  -5 -11  -2   37.34   28.44
  -5  11  -2   26.94   21.98
   5  11   3    5.87   30.44
   5 -11   3   -8.37   38.79
  -5 -11  -3   50.22   26.04
  -5  11  -3   85.39   26.61
   5  11   4   40.56   37.62
  -5  11  -4   62.98   31.72
   5  11   5   99.64   35.42
   5 -11   5   50.72   47.31
  -5 -11  -5  116.39   31.47
  -5  11  -5  115.51   33.74
   5  11   6   26.66   25.82
   5 -11   6  -16.97   28.78
  -5 -11  -6   -7.49   18.45
   5  11   7  101.69   44.09
   5 -11   7  213.85   54.49
  -5 -11  -7  117.75   36.65
  -5  11  -7  146.31   39.30
   5  12  -9   89.17   43.03
   5 -12  -9   84.14   47.72
   5  12  -8  168.68   44.55
   5 -12  -8   71.51   48.91
  -5 -12   8   62.71   37.15
  -5  12   8   82.17   33.03
   5  12  -7  104.59   36.98
   5 -12  -7   52.22   34.42
  -5 -12   7   49.35   31.74
  -5  12   7   10.65   22.68
   5  12  -6  121.13   36.20
   5 -12  -6  120.95   54.23
  -5 -12   6  162.21   40.79
  -5  12   6  125.64   35.31
   5  12  -5   28.55   26.82
   5 -12  -5    5.67   40.67
  -5 -12   5   15.29   31.05
  -5  12   5   22.40   25.78
   5  12  -4  133.77   37.06
   5 -12  -4  161.73   51.92
  -5 -12   4   83.08   33.29
  -5  12   4  126.13   34.28
   5  12  -3    0.87   33.17
   5 -12  -3   -8.39   37.89
  -5 -12   3  -16.90   29.45
  -5  12   3  -21.07   23.47
   5  12  -2  112.18   45.60
   5 -12  -2  148.66   44.78
  -5 -12   2  163.83   44.85
  -5  12   2  179.70   37.94
   5  12  -1   23.72   27.22
  -5  12   1   11.33   26.41
   5  12   0  137.38   38.91
   5 -12   0   93.33   46.07
  -5 -12   0  199.16   42.15
  -5  12   0  168.16   31.63
   5  12   1  -23.37   29.79
   5 -12   1  -32.76   30.11
  -5 -12  -1   27.77   22.36
  -5  12  -1   28.33   26.31
   5  12   2  112.57   36.16
   5 -12   2   81.28   40.89
  -5 -12  -2   68.77   36.01
  -5  12  -2   49.68   35.42
   5  12   3   78.46   34.44
   5 -12   3   -5.05   40.65
  -5 -12  -3    9.02   25.08
  -5  12  -3  -18.09   28.99
   5  12   4  159.30   49.33
   5 -12   4  175.97   48.34
  -5 -12  -4  188.66   45.77
  -5  12  -4  145.52   37.33
   5  12   5  -26.43   35.09
   5 -12   5  143.89   49.17
  -5 -12  -5  138.36   38.67
  -5  12  -5   29.98   38.65
   5  13  -5   73.20   46.58
   5 -13  -5  107.01   52.20
  -5 -13   5   59.41   33.20
   5  13  -4    0.81   29.95
   5 -13  -4   43.09   40.86
  -5 -13   4    5.88   32.54
  -5  13   4    5.66   26.37
   5  13  -3   67.00   38.69
   5 -13  -3  148.97   48.09
  -5 -13   3  106.38   36.06
  -5  13   3   93.56   30.59
   5  13  -2  -28.59   28.92
   5 -13  -2  -36.40   42.66
  -5  13   2  -11.51   22.92
   5  13  -1   73.78   40.65
   5 -13  -1  136.42   46.23
  -5 -13   1   94.69   36.95
  -5  13   1  143.18   38.88
   5  13   0   -0.44   41.28
   5 -13   0  119.54   49.45
  -5  13   0   49.16   33.74
   5  13   1  198.26   46.48
   5 -13   1   88.84   43.64
  -5 -13  -1   61.67   33.89
  -5  13  -1   31.98   37.65
   6   0 -19  -25.72   34.75
  -6   0  19   -1.87   23.72
   6   0 -18   79.81   35.76
  -6   0  18   98.84   37.04
   6   0 -17  -19.77   27.08
  -6   0  17   19.99   18.98
   6   0 -16   -1.68   26.92
  -6   0  16  -15.10   19.21
   6   0 -15   46.57   30.66
   6   0 -14  148.33   32.83
  -6   0  14  131.47   25.51
   6   0 -13    4.80   19.90
   6   0 -12  315.35   34.45
  -6   0  12  411.61   35.23
   6   0 -10  162.57   10.20
   6   0 -10  198.76   30.22
  -6   0  10  212.63   25.25
   6   0  -9   -1.88    3.78
   6   0  -9    2.22    9.77
  -6   0   9   10.77    9.76
   6   0  -8  760.65   24.22
  -6   0   8  713.35   35.85
   6   0  -7    8.70    7.69
  -6   0   7   -1.09   10.29
  -6   0   7   11.78   13.39
   6   0  -6  917.23   31.32
  -6   0   6  870.36   39.50
  -6   0   6  926.23   33.61
  -6   0   5    1.89    7.42
  -6   0   5   -7.69    8.96
  -6   0   5    4.89    7.00
  -6   0   4  562.81   23.59
  -6   0   4  547.99   26.94
  -6   0   4  559.44   26.67
  -6   0   3    6.60    7.20
  -6   0   3   -4.65    8.79
  -6   0   3   10.34    9.14
   6   0  -2  678.15   23.27
  -6   0   2  636.99   28.65
  -6   0   2  712.46   29.76
   6   0  -1   -6.84    5.82
  -6   0   1   -7.34    8.63
  -6   0   1    4.71    8.81
   6   0   0    1.66    6.64
  -6   0   0   32.24   12.10
  -6   0   0   13.11   10.27
   6   0   1   -5.34    6.56
  -6   0  -1    2.88   11.36
  -6   0  -1   24.16    9.34
   6   0   2  492.00   23.75
  -6   0  -2  421.65   26.44
  -6   0  -2  465.40   30.77
   6   0   3   -8.97    8.22
  -6   0  -3    0.18    8.90
  -6   0  -3    2.60   11.07
   6   0   4  335.77   21.73
  -6   0  -4  306.20   26.49
  -6   0  -4  239.11   24.19
   6   0   5   -3.95   12.83
  -6   0  -5   19.61   12.41
  -6   0  -5    1.05   13.69
   6   0   6   86.22   20.60
  -6   0  -6  132.58   22.63
  -6   0  -6  105.64   20.62
   6   0   7    2.79   12.78
  -6   0  -7   -9.59   15.58
   6   0   8  240.30   28.95
  -6   0  -8  176.07   27.48
  -6   0  -8  230.30   27.08
   6   0   9    6.95   18.50
  -6   0  -9   49.40   20.34
  -6   0  -9   -6.47   21.23
   6   0  10   29.75   23.03
  -6   0 -10   42.17   27.02
   6   0  11  -20.33   21.18
   6   0  11  -13.32   21.12
  -6   0 -11    7.43   19.88
   6   0  12   23.58   20.22
   6   0  12   24.29   25.36
  -6   0 -12   -5.19   28.85
   6   0  13   39.65   28.26
  -6   0 -13    3.12   32.05
   6   1 -19   31.71   31.02
   6  -1 -19    5.28   38.63
  -6  -1  19   21.48   27.64
  -6   1  19   29.18   28.08
   6   1 -18  115.09   40.22
   6  -1 -18   39.78   36.52
  -6  -1  18   55.97   29.82
  -6   1  18   37.10   34.28
   6  -1 -17   71.55   34.31
   6   1 -17   -1.81   28.44
  -6  -1  17    1.37   28.07
  -6   1  17   78.51   26.07
   6   1 -16   21.39   24.97
   6  -1 -16   23.96   20.65
  -6  -1  16   -5.12   22.48
  -6   1  16  -20.34   22.12
   6   1 -15   81.38   28.70
   6  -1 -15   77.71   34.00
  -6  -1  15   67.91   24.56
  -6   1  15  110.72   25.25
   6   1 -14   64.82   24.79
   6  -1 -14   56.90   30.57
  -6  -1  14   99.50   23.18
  -6   1  14   28.01   25.87
   6   1 -13  242.37   31.63
   6  -1 -13  262.00   32.03
  -6  -1  13  292.42   30.25
  -6   1  13  272.55   33.71
   6   1 -12   70.10   22.89
   6  -1 -12   88.97   27.71
  -6  -1  12   96.76   19.20
  -6   1  12   52.16   18.96
   6  -1 -11  524.96   44.28
   6   1 -11  528.31   42.61
  -6  -1  11  535.22   39.25
  -6   1  11  514.10   34.37
   6  -1 -10  190.10   25.82
   6   1 -10  148.53   22.38
   6  -1 -10  175.16   13.09
  -6  -1  10  155.77   25.64
  -6   1  10  140.66   23.99
   6   1  -9  524.33   34.03
   6  -1  -9  478.63   19.70
   6   1  -9  528.25   18.17
  -6   1   9  551.04   32.95
  -6  -1   9  530.40   31.18
   6   1  -8    4.97   11.87
   6  -1  -8   11.44    6.93
  -6   1   8    7.97   12.80
  -6   1   8   -1.12   11.48
  -6  -1   8   20.79   13.03
   6   1  -7 1548.79   54.82
   6  -1  -7 1565.54   41.83
  -6  -1   7 1567.90   52.58
  -6  -1   7 1570.52   40.65
  -6   1   7 1566.65   46.70
  -6   1   7 1621.29   57.76
   6  -1  -6   12.59    9.78
  -6   1   6   22.89    9.78
  -6  -1   6    4.40   10.34
  -6  -1   6   20.26    8.86
  -6  -1   6   28.55   11.63
  -6   1   6    6.46   10.82
   6  -1  -5 2465.77   60.21
  -6   1   5 2447.63   54.62
  -6  -1   5 2444.13   57.15
  -6  -1   5 2463.62   63.22
  -6   1   5 2429.47   67.77
  -6  -1   5 2400.78   61.54
   6  -1  -4   11.15   10.39
  -6  -1   4   40.58    9.13
  -6  -1   4   36.65   10.94
  -6  -1   4   39.94    9.48
  -6   1   4   23.76    7.79
  -6   1   4   38.57   10.72
   6  -1  -3 1044.59   39.23
  -6  -1   3 1051.43   36.96
  -6  -1   3 1035.83   35.10
  -6  -1   3 1129.77   36.53
  -6   1   3 1098.68   28.02
  -6   1   3 1115.86   38.73
   6   1  -2   32.13    9.62
   6  -1  -2   22.31   12.10
   6  -1  -2   17.30    5.66
  -6  -1   2   36.33   11.64
  -6  -1   2   38.76    9.23
  -6   1   2   -1.45   10.24
   6   1  -1  189.42   16.22
   6  -1  -1  174.71   10.14
  -6  -1   1  181.51   16.87
  -6  -1   1  198.51   15.60
  -6   1   1  175.81   16.37
   6   1   0   76.37   13.84
   6  -1   0   96.70    8.51
  -6  -1   0  106.06   12.81
  -6   1   0  101.37   15.57
  -6   1   0   72.63   14.77
  -6  -1   0  100.79   14.16
   6   1   1  267.93   20.24
   6  -1   1  269.51   13.15
  -6  -1  -1  238.36   23.20
  -6  -1  -1  266.69   17.46
  -6   1  -1  297.19   25.71
  -6   1  -1  269.21   22.51
   6   1   2   59.01   14.98
   6  -1   2   53.35    8.72
  -6   1  -2   48.84   18.47
  -6  -1  -2   45.50   14.79
  -6  -1  -2   51.14   12.25
  -6   1  -2   69.31   13.76
   6   1   3  435.87   27.01
   6  -1   3  426.56   21.13
  -6  -1  -3  393.63   24.82
  -6   1  -3  371.72   25.50
  -6   1  -3  393.11   30.95
  -6  -1  -3  400.57   30.32
   6   1   4    6.91   12.56
   6  -1   4   -0.68    7.96
  -6  -1  -4    7.90   10.76
  -6  -1  -4   38.47   11.38
  -6   1  -4   -8.57   12.15
  -6   1  -4  -11.34   11.24
   6   1   5  278.58   27.41
   6  -1   5  272.11   21.65
  -6  -1  -5  314.45   25.37
  -6  -1  -5  284.11   24.97
  -6   1  -5  232.06   21.11
  -6   1  -5  254.52   29.30
   6   1   6   43.75   19.27
   6  -1   6   28.10   15.69
   6  -1   6   61.29   17.21
  -6  -1  -6   51.00   16.79
  -6  -1  -6   35.89   19.67
  -6   1  -6   43.65   19.70
   6   1   7   23.94   18.31
   6  -1   7    7.13   15.96
   6  -1   7   40.19   14.09
  -6   1  -7   25.57   18.94
  -6  -1  -7   18.47   14.89
  -6  -1  -7  -10.87   16.47
   6   1   8  225.67   32.03
   6  -1   8  256.17   33.24
   6  -1   8  265.47   27.23
  -6  -1  -8  250.58   31.93
  -6   1  -8  286.98   34.01
  -6  -1  -8  221.58   29.28
   6   1   9  111.77   26.90
   6  -1   9   38.93   20.20
   6  -1   9   41.48   20.30
  -6  -1  -9   98.18   23.08
  -6  -1  -9   66.09   24.26
  -6   1  -9   28.43   26.20
   6  -1  10  181.46   34.05
   6   1  10  191.12   34.93
   6  -1  10  195.67   28.86
  -6  -1 -10  199.26   32.95
  -6  -1 -10  140.44   31.75
  -6   1 -10  158.19   37.35
   6   1  11   60.00   28.08
   6  -1  11   17.24   25.94
   6  -1  11    4.38   23.76
  -6  -1 -11   64.59   29.08
  -6  -1 -11   64.15   25.73
  -6   1 -11   62.61   29.05
   6   1  12   96.55   29.23
   6  -1  12  114.20   29.43
   6  -1  12   54.20   30.15
  -6  -1 -12   82.52   24.29
  -6   1 -12   52.46   37.01
  -6  -1 -12  108.60   34.48
   6   1  13   11.86   17.04
  -6  -1 -13   -5.86   21.79
  -6   1 -13   -9.07   18.51
   6   2 -18   38.75   33.19
   6  -2 -18    5.15   34.41
  -6   2  18    0.27   30.09
  -6  -2  18   19.77   29.08
   6   2 -17   99.19   39.01
   6  -2 -17  127.66   38.45
  -6  -2  17   39.88   27.33
  -6   2  17   82.19   36.10
   6   2 -16    5.67   21.82
   6  -2 -16   12.65   25.85
  -6  -2  16   23.16   22.07
  -6   2  16   -7.60   20.18
   6   2 -15   78.52   31.35
   6  -2 -15   49.90   26.36
  -6   2  15   46.56   28.69
  -6  -2  15   68.82   29.05
   6   2 -14   79.66   26.55
   6  -2 -14   86.09   32.29
  -6  -2  14   97.10   28.39
  -6   2  14  134.75   29.34
   6   2 -13  234.78   36.45
   6  -2 -13  232.46   31.80
  -6  -2  13  226.62   33.03
  -6   2  13  217.46   33.06
   6   2 -12  304.71   37.38
   6  -2 -12  305.21   32.98
  -6  -2  12  353.52   33.80
  -6   2  12  277.48   32.83
   6   2 -11  299.82   35.73
   6  -2 -11  300.17   32.75
  -6  -2  11  333.96   31.60
  -6   2  11  279.57   30.86
   6   2 -10  195.65   28.82
   6  -2 -10  173.11   30.09
   6  -2 -10  203.73   15.17
  -6   2  10  175.63   25.40
  -6  -2  10  136.52   26.11
   6  -2  -9   -6.97    8.31
   6   2  -9  -10.98   14.48
  -6  -2   9    2.06    5.86
  -6   2   9  -14.24   12.54
  -6   2   9   -6.14   11.65
   6   2  -8   59.53   16.23
   6  -2  -8   86.14   13.68
  -6  -2   8   80.73   19.05
  -6  -2   8   76.75    9.91
  -6   2   8   83.25   15.78
  -6   2   8  101.41   19.48
   6   2  -7   13.73   12.96
   6  -2  -7    5.83    9.44
  -6  -2   7   39.98   12.93
  -6   2   7   -8.18    9.60
  -6   2   7   13.89   14.39
  -6  -2   7   -0.17    6.27
   6   2  -6  435.44   24.79
   6  -2  -6  388.20   23.42
  -6  -2   6  363.64   20.47
  -6  -2   6  346.12   26.06
  -6   2   6  368.48   20.29
  -6   2   6  321.39   24.68
   6  -2  -5   16.92   10.79
  -6  -2   5    0.82   10.55
  -6  -2   5    0.22    9.83
  -6  -2   5    7.97    9.03
  -6   2   5   11.27    7.06
  -6   2   5   10.25   12.74
   6  -2  -4  207.47   16.80
  -6   2   4  208.44   18.69
  -6  -2   4  170.60   15.93
  -6  -2   4  182.62   16.81
  -6  -2   4  194.51   17.77
  -6   2   4  207.99   11.28
   6  -2  -3  526.15   26.36
  -6  -2   3  499.49   27.02
  -6  -2   3  471.48   26.59
  -6  -2   3  497.24   22.31
  -6   2   3  487.29   15.52
  -6   2   3  471.29   28.40
   6   2  -2   46.25   12.14
   6  -2  -2   25.35   13.74
   6  -2  -2   14.68    4.81
  -6  -2   2   16.91    8.09
  -6   2   2   38.85   11.18
  -6  -2   2   34.99   10.39
   6  -2  -1   84.81   15.75
   6   2  -1  103.28   16.01
   6  -2  -1   90.00    6.84
  -6  -2   1  125.75   14.90
  -6  -2   1   99.80   11.20
  -6   2   1   84.48   17.72
   6   2   0  119.97   18.31
   6  -2   0  153.49   18.50
   6  -2   0  137.93    7.47
  -6  -2   0  128.44   16.44
  -6  -2   0  111.84   12.03
  -6   2   0  140.93   19.27
   6   2   1  288.88   24.19
   6  -2   1  289.17   23.33
   6  -2   1  250.29   10.25
  -6  -2  -1  284.70   16.23
  -6   2  -1  281.98   21.96
  -6  -2  -1  251.41   21.55
   6   2   2  223.68   23.23
   6  -2   2  221.40   27.06
   6  -2   2  237.10   11.64
  -6  -2  -2  225.43   20.93
  -6  -2  -2  196.68   15.23
  -6   2  -2  253.57   25.35
   6  -2   3   43.98   18.67
   6   2   3   33.88   16.68
   6  -2   3   31.28    6.85
  -6  -2  -3   16.51   14.39
  -6  -2  -3   35.85    9.57
  -6   2  -3   13.47   13.73
   6  -2   4  119.88   11.25
   6  -2   4  114.21   25.62
   6   2   4  107.34   19.58
  -6  -2  -4  104.92   14.14
  -6  -2  -4  125.79   19.25
  -6   2  -4  171.55   20.93
   6   2   5   47.92   20.06
   6  -2   5   57.14   17.75
   6  -2   5   42.13    9.87
  -6  -2  -5   37.39   11.99
  -6   2  -5   59.77   17.54
  -6  -2  -5    5.80   19.35
   6   2   6   48.69   17.99
   6  -2   6   54.54   22.36
   6  -2   6   59.78   13.16
  -6  -2  -6   62.71   20.01
  -6   2  -6   73.87   23.16
  -6  -2  -6   31.69   13.63
   6  -2   7  286.00   32.88
   6   2   7  266.44   33.82
   6  -2   7  284.67   22.22
  -6  -2  -7  313.93   26.48
  -6  -2  -7  230.68   25.75
  -6   2  -7  278.99   30.65
   6   2   8   66.00   26.12
   6  -2   8   73.93   16.18
   6  -2   8    4.90   22.74
  -6  -2  -8   33.91   18.12
  -6  -2  -8   25.89   18.17
  -6   2  -8   72.16   26.16
   6   2   9  190.54   35.79
   6  -2   9  232.13   33.44
   6  -2   9  194.76   25.35
  -6  -2  -9  238.08   33.43
  -6   2  -9  273.74   33.17
  -6  -2  -9  269.17   29.57
   6   2  10   -6.76   20.54
   6  -2  10    5.66   20.26
   6  -2  10   -6.71   16.57
  -6  -2 -10   23.30   18.91
  -6  -2 -10   46.48   19.60
  -6   2 -10    0.59   20.60
   6   2  11  269.66   42.31
   6  -2  11  228.39   35.35
   6  -2  11  198.88   29.11
  -6  -2 -11  190.15   36.30
  -6  -2 -11  175.24   35.73
  -6   2 -11  229.41   44.17
   6   2  12   -4.49   21.30
   6  -2  12    9.22   20.12
  -6  -2 -12   23.55   22.41
  -6  -2 -12   -5.00   22.23
  -6   2 -12    2.87   22.22
   6   2  13   21.77   26.24
  -6   2 -13   14.18   26.63
   6   3 -18  258.27   47.44
   6  -3 -18  117.44   48.32
  -6   3  18  105.89   43.79
  -6  -3  18   98.99   34.47
   6   3 -17   22.70   30.07
   6  -3 -17   11.28   30.32
  -6  -3  17   31.25   21.91
  -6   3  17  -30.64   28.25
   6   3 -16  239.28   42.37
   6  -3 -16  168.84   35.74
  -6  -3  16   87.24   36.54
  -6   3  16  143.80   32.95
   6   3 -15   -7.52   24.95
   6  -3 -15    5.79   24.25
  -6  -3  15   -0.33   17.66
  -6   3  15   29.57   22.36
   6   3 -14  182.10   31.22
   6  -3 -14  138.87   30.93
  -6  -3  14  133.24   31.50
  -6   3  14  158.30   28.20
   6   3 -13   15.16   22.98
   6  -3 -13   21.53   23.41
  -6  -3  13   23.58   20.99
  -6   3  13    5.23   21.33
   6  -3 -12  203.05   35.43
   6   3 -12  186.10   27.92
  -6  -3  12  198.24   26.46
  -6   3  12  232.38   31.33
   6   3 -11   -3.84   16.32
   6  -3 -11   -0.50   14.50
   6  -3 -11    8.50    9.18
  -6  -3  11   -4.86   11.43
  -6   3  11  -12.99   11.55
   6   3 -10   24.82   15.68
   6  -3 -10   44.55   12.73
  -6  -3  10   64.94   18.45
  -6  -3  10   13.56    6.29
  -6   3  10   38.91   20.03
  -6   3  10   29.45   16.77
   6   3  -9  -12.12   11.95
   6  -3  -9   -0.12   10.87
  -6  -3   9    2.12   12.58
  -6   3   9   10.77   13.63
  -6   3   9    3.48   10.04
  -6  -3   9    7.06    5.64
   6   3  -8  -13.57   13.74
   6  -3  -8   10.33   10.78
  -6  -3   8    2.28    6.22
  -6  -3   8   10.96   13.94
  -6   3   8   22.65   14.56
  -6   3   8    2.60   10.61
   6   3  -7   71.69   15.35
   6  -3  -7   47.01   14.70
  -6  -3   7   50.94   17.25
  -6  -3   7   39.56   10.92
  -6   3   7   40.99   15.26
  -6   3   7   38.68   12.37
   6  -3  -6    4.22   11.87
   6   3  -6   35.05   11.02
  -6  -3   6   -9.44   11.27
  -6  -3   6   18.68    8.95
  -6   3   6    1.28    7.18
  -6   3   6   14.92   14.31
   6   3  -5    9.03    9.87
   6  -3  -5   30.69   12.35
  -6  -3   5   -5.65    9.81
  -6  -3   5   21.04   13.21
  -6   3   5   14.29    5.97
   6   3  -4   65.47   12.18
   6  -3  -4   54.35   17.39
  -6  -3   4  100.78   17.84
  -6   3   4   88.04    7.20
  -6   3   4   59.11   17.66
  -6  -3   4   93.98   14.98
   6  -3  -3   14.73   14.26
  -6  -3   3   -0.41    6.93
  -6  -3   3   11.64    9.78
  -6   3   3   19.93    4.38
  -6   3   3   19.39   11.14
   6   3  -2   70.24   16.34
   6  -3  -2   95.81   17.45
   6  -3  -2   59.30    4.21
  -6  -3   2   52.16   12.31
  -6   3   2   49.79   14.19
  -6  -3   2   48.49    8.85
   6   3  -1   42.36   11.81
   6  -3  -1    5.78   15.33
  -6  -3   1   24.37    6.53
  -6   3   1   26.99   15.09
  -6  -3   1   32.92   14.03
   6   3   0  273.43   26.99
   6  -3   0  287.79   23.93
  -6  -3   0  291.41   23.69
  -6  -3   0  303.72   13.37
  -6   3   0  286.95   23.61
   6   3   1   17.49   14.91
   6  -3   1   -3.97   12.79
  -6  -3  -1   10.27    5.51
  -6   3  -1   29.89   12.07
   6   3   2  382.85   31.18
   6  -3   2  414.61   29.39
  -6  -3  -2  423.10   17.32
  -6   3  -2  406.11   29.58
  -6  -3  -2  413.58   31.85
   6   3   3   29.85   17.45
   6  -3   3   38.37   16.44
  -6  -3  -3   21.75   16.59
  -6   3  -3   11.15   14.30
  -6  -3  -3   18.34    7.09
   6   3   4  897.70   48.14
   6  -3   4  806.34   43.11
   6  -3   4  775.94   22.25
  -6  -3  -4  871.27   42.14
  -6  -3  -4  802.03   28.59
  -6   3  -4  880.43   48.85
   6  -3   5  303.64   14.95
   6  -3   5  368.90   30.52
   6   3   5  331.57   35.15
  -6  -3  -5  339.80   29.41
  -6  -3  -5  298.14   18.94
  -6   3  -5  381.65   35.48
   6   3   6  477.70   40.66
   6  -3   6  427.54   37.91
   6  -3   6  391.58   19.86
  -6  -3  -6  438.39   24.51
  -6  -3  -6  452.94   37.10
  -6   3  -6  468.91   40.62
   6   3   7   52.77   19.99
   6  -3   7   43.99   20.45
   6  -3   7   24.26   10.12
  -6  -3  -7   27.29   20.42
  -6   3  -7  -12.81   23.31
  -6  -3  -7   35.91   14.22
   6   3   8  268.91   38.34
   6  -3   8  255.31   33.20
   6  -3   8  226.06   19.71
  -6  -3  -8  243.41   26.52
  -6  -3  -8  251.64   33.01
  -6   3  -8  269.98   37.76
   6   3   9   36.79   25.79
   6  -3   9    2.86   20.23
  -6  -3  -9   22.08   15.82
  -6  -3  -9   13.27   17.10
  -6   3  -9  -15.84   25.24
   6   3  10  202.03   40.98
   6  -3  10  246.53   35.31
  -6  -3 -10  226.03   33.82
  -6  -3 -10  236.46   30.20
  -6   3 -10  200.57   42.73
   6   3  11   17.59   21.94
   6  -3  11   13.36   22.85
  -6  -3 -11   10.90   22.14
  -6   3 -11   -3.37   29.30
   6   3  12   34.09   36.85
   6  -3  12   46.37   28.01
  -6  -3 -12   32.36   28.35
  -6   3 -12   66.33   30.28
   6   3  13   46.88   38.46
  -6   3 -13   31.21   32.09
   6   4 -18   27.31   30.60
   6  -4 -18   40.58   30.51
  -6   4  18   18.45   28.10
   6   4 -17   71.97   35.18
   6  -4 -17   99.53   42.08
  -6  -4  17  128.31   31.64
  -6   4  17  127.36   33.32
   6   4 -16   49.34   33.62
   6  -4 -16   37.63   27.85
  -6  -4  16   59.43   31.83
  -6   4  16   60.54   27.05
   6   4 -15   73.24   35.58
   6  -4 -15  103.74   36.05
  -6  -4  15   96.98   26.01
  -6   4  15   64.36   33.70
   6   4 -14   66.96   30.30
   6  -4 -14   65.31   24.65
  -6   4  14   23.62   28.02
  -6  -4  14   59.55   22.30
   6   4 -13   38.35   28.04
   6  -4 -13   97.87   25.76
  -6  -4  13   47.33   21.49
  -6   4  13   72.70   27.90
   6   4 -12   19.38   23.91
   6  -4 -12    8.70   22.00
  -6  -4  12   51.18   18.12
  -6   4  12   60.56   18.97
   6   4 -11   57.60   18.99
   6  -4 -11   49.92   15.93
  -6  -4  11   11.56   20.74
  -6   4  11   45.97   18.03
   6   4 -10   35.96   12.77
   6  -4 -10   24.58   12.56
  -6  -4  10    3.56   12.97
  -6   4  10    5.67   13.57
  -6   4  10   -9.87   12.89
  -6  -4  10   -5.33    5.10
   6   4  -9   23.67   14.32
   6  -4  -9   -9.55   10.70
  -6  -4   9   -3.33    6.24
  -6  -4   9   24.09   12.44
  -6   4   9   10.97   13.01
  -6   4   9    7.52   13.73
   6   4  -8  139.77   22.49
   6  -4  -8  139.45   22.78
  -6  -4   8  155.42   21.81
  -6  -4   8  170.34   15.19
  -6   4   8  168.35   19.86
  -6   4   8  127.03   21.95
   6  -4  -7    6.65   15.11
   6   4  -7   32.49   13.44
  -6  -4   7    3.87   13.22
  -6   4   7   -0.64   14.18
  -6   4   7   25.05   10.83
   6   4  -6  213.35   19.71
   6  -4  -6  234.42   21.34
  -6  -4   6  234.94   18.96
  -6  -4   6  213.71   25.77
  -6   4   6  194.02   22.95
  -6   4   6  183.37   14.25
   6   4  -5    2.62    9.21
   6  -4  -5    2.96   11.61
  -6  -4   5   -7.41   14.00
  -6  -4   5    7.70   10.30
  -6   4   5   39.38   14.39
  -6   4   5    5.77    5.34
   6  -4  -4   50.68   16.69
  -6  -4   4   37.87   13.74
  -6  -4   4   16.63   12.37
  -6   4   4    4.90   15.74
   6   4  -3   43.39   15.34
   6  -4  -3   47.44   19.07
   6   4  -3   43.17    8.13
  -6  -4   3  109.57   15.98
  -6   4   3   52.36    4.16
  -6   4   3   65.56   15.04
   6   4  -2  216.20   11.60
   6  -4  -2  186.32   22.99
   6   4  -2  186.16   24.18
  -6  -4   2  204.14   22.34
  -6   4   2  211.38   21.90
   6   4  -1   71.01   16.71
   6  -4  -1   80.27   17.68
  -6  -4   1   79.99    7.86
  -6  -4   1   91.50   17.61
  -6   4   1   73.36   21.50
   6   4   0   44.97   19.96
   6  -4   0   90.01   20.65
  -6  -4   0   39.59    5.95
  -6  -4   0  101.75   17.24
  -6   4   0   39.33   18.20
   6  -4   1  252.10   29.81
   6   4   1  239.27   24.72
  -6  -4  -1  280.43   26.82
  -6  -4  -1  242.58   10.38
  -6   4  -1  261.75   25.02
   6   4   2  126.34   20.63
   6  -4   2  137.42   24.67
  -6  -4  -2   89.71    7.24
  -6   4  -2   96.73   23.69
  -6  -4  -2   81.30   18.47
   6   4   3  612.83   38.88
   6  -4   3  648.21   39.45
  -6  -4  -3  551.82   18.87
  -6   4  -3  660.33   38.86
  -6  -4  -3  582.89   38.43
   6   4   4   54.22   23.83
   6  -4   4   62.70   24.67
  -6  -4  -4   52.61   17.34
  -6  -4  -4   64.42    8.70
  -6   4  -4   52.94   22.41
   6   4   5  170.65   31.59
   6  -4   5  178.62   29.24
  -6  -4  -5  181.80   26.24
  -6  -4  -5  141.52   12.00
  -6   4  -5  146.84   24.47
   6   4   6   -5.14   21.94
   6  -4   6   13.16   15.94
  -6  -4  -6   -3.10   18.83
  -6   4  -6   61.72   22.61
   6   4   7   52.44   27.21
   6  -4   7   64.38   25.97
  -6  -4  -7   70.28   23.60
  -6   4  -7   27.96   28.18
   6   4   8   56.87   27.03
   6  -4   8   15.84   22.79
  -6  -4  -8   39.60   18.13
  -6   4  -8   -6.36   21.44
   6   4   9   50.37   34.88
   6  -4   9   69.78   27.29
  -6  -4  -9   56.85   27.60
  -6   4  -9   74.23   32.11
   6   4  10   19.35   33.47
   6  -4  10   38.90   25.95
  -6   4 -10   83.56   33.66
  -6  -4 -10   24.35   25.67
   6   4  11   89.08   31.75
   6  -4  11   40.41   28.29
  -6  -4 -11   64.96   27.96
  -6   4 -11   44.22   31.12
   6   4  12   33.26   30.46
   6  -4  12   27.40   23.38
  -6  -4 -12  -13.36   19.57
  -6   4 -12  -11.05   30.25
   6   5 -17   24.14   27.45
   6  -5 -17   39.05   27.06
  -6  -5  17    5.17   26.01
  -6   5  17   15.19   33.34
   6   5 -16  125.88   38.23
   6  -5 -16   57.87   38.75
  -6   5  16  100.98   37.99
  -6  -5  16  137.42   37.50
   6   5 -15  193.22   40.33
   6  -5 -15  166.98   35.91
  -6  -5  15  178.00   32.50
  -6   5  15  187.77   39.83
   6   5 -14  125.74   28.50
   6  -5 -14   76.13   27.41
  -6   5  14   98.18   26.24
  -6  -5  14   82.88   26.37
   6   5 -13  143.49   33.21
   6  -5 -13  128.57   31.29
  -6  -5  13  150.45   32.75
  -6   5  13  105.65   31.82
   6   5 -12   54.67   29.70
   6  -5 -12   83.07   27.32
   6  -5 -12  130.98   19.61
  -6   5  12  119.44   27.33
  -6  -5  12  109.53   23.54
   6   5 -11   55.98   21.33
   6  -5 -11   52.35   20.38
  -6  -5  11   52.02   20.94
  -6   5  11   96.68   22.09
  -6   5  11   97.36   27.00
   6   5 -10    4.80   17.25
   6  -5 -10   10.11   18.24
  -6  -5  10   27.87   19.26
  -6  -5  10   24.54    7.88
  -6   5  10    7.96   15.50
  -6   5  10   19.98   17.30
   6   5  -9  427.15   33.69
   6  -5  -9  349.17   35.23
  -6  -5   9  368.54   20.36
  -6   5   9  371.33   29.70
  -6   5   9  371.56   33.16
  -6  -5   9  421.07   36.60
   6   5  -8   86.29   17.64
   6  -5  -8   22.51   20.52
  -6  -5   8   34.26   19.98
  -6  -5   8   28.06   11.14
  -6   5   8   29.26   15.32
  -6   5   8   33.61   16.64
   6   5  -7  351.42   26.82
   6  -5  -7  392.24   34.65
  -6  -5   7  443.69   26.69
  -6  -5   7  397.30   35.26
  -6   5   7  428.82   23.89
  -6   5   7  402.34   32.34
   6   5  -6   25.32   10.27
   6  -5  -6   -6.95   17.18
  -6  -5   6  -16.48   15.48
  -6  -5   6   27.58   11.39
  -6   5   6    1.36   16.37
  -6   5   6    1.71    7.67
   6   5  -5  174.86   14.80
   6  -5  -5  215.48   27.38
  -6  -5   5  210.72   27.61
  -6  -5   5  173.27   20.30
  -6   5   5  199.67   22.40
  -6   5   5  185.12   11.74
   6   5  -4    6.04    6.81
   6  -5  -4  -14.59   18.32
  -6  -5   4   44.31   13.20
  -6   5   4    8.37    4.75
  -6   5   4   48.82   15.84
   6   5  -3  366.30   15.88
   6   5  -3  366.18   30.05
   6  -5  -3  361.21   33.74
  -6  -5   3  346.55   25.32
  -6   5   3  348.62   28.70
   6   5  -2  106.87    7.98
   6   5  -2  147.99   24.52
   6  -5  -2  129.93   21.94
  -6   5   2  154.28   23.77
  -6  -5   2  129.44   21.44
   6   5  -1  479.85   37.64
   6  -5  -1  529.08   35.94
  -6  -5   1  527.86   34.73
  -6   5   1  491.28   37.81
   6   5   0   71.35   19.05
   6  -5   0   23.48   22.75
  -6   5   0   52.59   16.61
  -6  -5   0   39.27   18.51
   6   5   1  644.93   40.38
   6  -5   1  641.96   39.97
  -6  -5  -1  617.77   39.12
  -6   5  -1  724.36   43.86
   6   5   2   12.22   18.63
   6  -5   2    9.68   18.36
  -6  -5  -2   -5.61   11.93
  -6   5  -2   19.64   17.99
   6   5   3  229.22   28.58
   6  -5   3  211.99   32.00
  -6  -5  -3  220.09   25.13
  -6   5  -3  259.35   28.68
   6   5   4   40.57   20.03
   6  -5   4   21.21   22.75
  -6   5  -4   57.94   19.23
  -6  -5  -4   -6.43   19.34
   6   5   5  135.89   26.10
   6  -5   5  125.36   29.27
  -6  -5  -5  130.66   26.86
  -6   5  -5  133.98   26.39
   6   5   6  114.59   33.27
   6  -5   6  178.23   30.72
  -6   5  -6  142.97   28.12
  -6  -5  -6  143.69   28.19
   6   5   7   53.36   22.55
   6  -5   7  -15.80   22.27
  -6  -5  -7   21.61   20.89
  -6   5  -7   21.76   21.25
   6   5   8  133.35   36.53
   6  -5   8  114.04   31.47
  -6   5  -8   90.82   33.62
  -6  -5  -8   86.86   29.93
   6   5   9   41.81   31.23
   6  -5   9   67.97   25.37
  -6  -5  -9   -7.12   19.47
  -6   5  -9   38.73   29.87
   6   5  10   99.41   32.51
   6  -5  10   85.71   31.27
  -6  -5 -10   61.32   31.26
  -6   5 -10   67.03   37.29
   6   5  11   89.33   35.95
   6  -5  11   -3.66   27.16
  -6  -5 -11    0.71   28.69
  -6   5 -11   65.95   34.90
   6   5  12   47.81   31.88
  -6   5 -12   38.53   32.35
  -6  -5 -12   22.24   23.31
   6   6 -17  -31.05   24.79
   6  -6 -17    0.49   25.83
  -6  -6  17    2.79   18.08
  -6   6  17   26.32   24.31
   6   6 -16   77.54   35.81
   6  -6 -16   17.56   37.02
  -6   6  16  104.25   36.14
  -6  -6  16   61.38   36.26
   6   6 -15    2.47   19.69
   6  -6 -15   -8.39   25.49
  -6  -6  15  -13.13   23.29
  -6   6  15    1.05   22.93
   6   6 -14  154.89   36.96
   6  -6 -14  138.75   39.65
  -6   6  14   97.25   33.41
  -6  -6  14  142.01   36.54
   6   6 -13    0.86   26.35
   6  -6 -13   60.41   27.29
  -6  -6  13   50.35   19.93
  -6   6  13  -18.09   22.96
   6   6 -12  222.41   29.00
   6  -6 -12  184.57   37.78
   6  -6 -12  142.00   24.85
  -6  -6  12  211.79   35.02
  -6   6  12  142.09   30.05
   6   6 -11    3.94   15.66
   6  -6 -11   42.18   17.11
  -6  -6  11  -14.34   20.38
  -6   6  11   14.42   17.56
  -6   6  11    5.20   17.25
   6   6 -10  285.85   30.84
   6  -6 -10  239.44   33.91
  -6  -6  10  255.20   30.05
  -6  -6  10  253.58   18.98
  -6   6  10  215.25   28.37
  -6   6  10  237.87   35.42
   6  -6  -9  -10.36   18.40
  -6  -6   9  -10.06   10.23
  -6   6   9   -3.58   13.54
  -6   6   9    1.17   18.43
   6   6  -8  557.01   33.48
   6  -6  -8  477.46   42.56
  -6  -6   8  560.85   30.60
  -6  -6   8  537.85   37.74
  -6   6   8  508.26   30.48
  -6   6   8  513.00   40.23
   6   6  -7   14.53   13.86
   6  -6  -7   13.20   22.23
  -6  -6   7   46.81   20.63
  -6  -6   7   39.78   14.69
  -6   6   7   24.03   11.11
  -6   6   7   49.52   20.63
   6   6  -6  270.72   20.09
   6  -6  -6  245.05   33.97
  -6  -6   6  223.23   32.26
  -6  -6   6  250.26   21.90
  -6   6   6  249.39   16.10
  -6   6   6  246.17   30.75
   6   6  -5   20.43    8.48
   6  -6  -5   -6.33   20.44
  -6  -6   5   17.50   15.04
  -6   6   5    5.73    6.06
  -6   6   5    8.68   13.83
  -6  -6   5   -9.91   13.57
   6   6  -4  238.94   14.91
   6   6  -4  225.02   32.66
   6  -6  -4  285.48   30.57
  -6  -6   4  329.24   25.20
  -6   6   4  248.39   30.51
   6  -6  -3   87.56   26.02
   6   6  -3   53.54   22.80
  -6  -6   3   64.25   18.79
  -6   6   3   51.65   22.04
   6   6  -2  515.86   41.35
   6  -6  -2  542.34   44.81
  -6  -6   2  515.27   36.17
  -6   6   2  521.80   37.90
   6  -6  -1  145.93   31.44
   6   6  -1  248.98   27.70
  -6  -6   1  177.37   27.52
  -6   6   1  226.60   25.54
   6   6   0  290.62   33.07
   6  -6   0  312.37   32.43
  -6  -6   0  324.93   32.02
  -6   6   0  361.88   34.77
   6   6   1    5.60   17.44
   6  -6   1   16.45   18.09
  -6  -6  -1  -13.05   12.01
  -6   6  -1   -6.26   15.44
   6   6   2  302.26   36.92
   6  -6   2  195.91   34.85
  -6  -6  -2  269.38   30.94
  -6   6  -2  272.52   34.70
   6  -6   3   38.21   17.44
   6   6   3   -0.80   21.52
  -6  -6  -3  -14.80   14.56
  -6   6  -3   51.60   20.45
   6   6   4  467.50   45.89
   6  -6   4  445.06   43.66
  -6  -6  -4  479.17   35.87
  -6   6  -4  489.86   43.04
   6   6   5   42.33   18.74
   6  -6   5    1.90   16.93
  -6  -6  -5    3.01   18.81
  -6   6  -5   -2.23   16.90
   6   6   6  426.44   46.68
   6  -6   6  318.51   40.60
  -6  -6  -6  366.87   39.27
  -6   6  -6  379.76   45.75
   6  -6   7   31.84   26.97
   6   6   7   64.39   31.67
  -6  -6  -7   35.66   21.14
  -6   6  -7   55.46   25.44
   6   6   8   86.31   36.99
   6  -6   8   89.81   26.35
  -6  -6  -8   93.73   24.71
  -6   6  -8  100.15   29.53
   6   6   9  127.55   36.43
   6  -6   9    3.85   28.79
  -6  -6  -9   81.23   29.38
  -6   6  -9   23.23   27.93
   6   6  10   38.01   39.10
   6  -6  10   51.18   29.29
  -6  -6 -10   46.50   24.89
  -6   6 -10   68.89   29.44
   6  -6  11   24.10   24.22
   6   6  11   -4.89   38.77
  -6  -6 -11   87.70   31.10
  -6   6 -11   -5.41   35.23
   6  -7 -16   20.66   27.42
  -6  -7  16  -10.61   26.40
  -6   7  16    0.46   26.26
   6  -7 -15   50.08   37.70
   6   7 -15  123.93   38.34
  -6  -7  15  162.01   37.62
  -6   7  15   50.27   34.55
   6   7 -14   57.08   31.62
   6  -7 -14   51.47   33.59
  -6  -7  14   84.31   32.50
  -6   7  14   27.19   28.55
   6  -7 -13   91.08   37.42
   6   7 -13  108.24   31.87
  -6  -7  13  135.72   29.45
  -6   7  13   93.68   30.06
   6   7 -12   20.69   22.53
   6  -7 -12   20.51   23.01
  -6  -7  12   18.02   21.25
  -6   7  12   49.45   22.50
   6   7 -11   86.75   27.47
   6  -7 -11  100.16   29.60
  -6  -7  11  101.60   26.19
  -6   7  11  117.66   26.58
  -6   7  11  140.08   26.14
   6   7 -10   11.60   18.35
   6  -7 -10    4.27   23.54
  -6  -7  10   24.14   22.62
  -6   7  10   43.21   17.50
  -6   7  10    2.02   22.78
  -6  -7  10   17.70   11.95
   6   7  -9  284.43   29.55
   6  -7  -9  322.24   41.24
  -6  -7   9  291.56   33.13
  -6  -7   9  263.96   25.74
  -6   7   9  338.57   29.01
  -6   7   9  272.69   37.20
   6   7  -8    8.07   13.32
   6  -7  -8   50.31   22.78
  -6  -7   8   -7.49   15.75
  -6  -7   8   10.10   13.28
  -6   7   8    5.78   12.00
  -6   7   8   -3.24   17.50
   6   7  -7  163.74   18.27
   6  -7  -7  199.71   35.60
  -6  -7   7  219.44   32.88
  -6  -7   7  198.53   24.08
  -6   7   7  174.81   17.54
  -6   7   7  197.08   26.45
   6   7  -6   -6.97    6.84
   6  -7  -6  -11.00   19.18
  -6  -7   6   -5.19   11.66
  -6  -7   6  -15.94   13.36
  -6   7   6    5.69    6.74
  -6   7   6   25.64   14.28
   6   7  -5  254.44   15.88
   6   7  -5  312.24   36.63
   6  -7  -5  294.51   39.31
  -6  -7   5  283.57   27.81
  -6   7   5  278.42   32.26
   6  -7  -4   44.63   26.56
   6   7  -4   28.83   23.12
  -6  -7   4   20.91   18.04
  -6   7   4   36.44   19.38
   6   7  -3  378.58   35.10
   6  -7  -3  402.20   39.63
  -6  -7   3  395.37   34.35
  -6   7   3  440.56   38.28
   6  -7  -2   18.68   17.43
   6   7  -2   10.75   16.33
  -6  -7   2   12.05   12.70
  -6   7   2  -15.82   13.56
   6   7  -1 1017.35   61.10
   6  -7  -1 1012.67   55.78
  -6  -7   1  956.88   49.20
  -6   7   1  963.45   55.33
   6  -7   0   -7.82   21.11
   6   7   0    6.49   19.34
  -6   7   0   14.22   17.43
   6   7   1   58.78   22.87
   6  -7   1   34.98   22.79
  -6  -7  -1   85.59   19.47
  -6   7  -1   93.43   25.28
   6   7   2   20.27   19.08
   6  -7   2    6.03   20.54
  -6  -7  -2   69.01   21.16
  -6   7  -2    7.99   18.29
   6   7   3   69.76   27.80
   6  -7   3   24.83   27.05
  -6  -7  -3   48.19   19.09
  -6   7  -3   55.08   21.74
   6  -7   4   48.66   21.22
   6   7   4   -0.95   21.49
  -6  -7  -4   83.81   22.57
  -6   7  -4   -2.15   19.88
   6   7   5   62.69   31.94
   6  -7   5   46.67   24.99
  -6  -7  -5   52.36   26.08
  -6   7  -5   64.31   28.52
   6  -7   6  -12.98   17.85
   6   7   6  -10.27   25.61
  -6  -7  -6   30.94   19.99
  -6   7  -6   13.20   21.24
   6   7   7   77.48   39.94
   6  -7   7   91.81   26.53
  -6  -7  -7   86.23   26.40
  -6   7  -7  143.21   37.06
   6  -7   8   99.96   35.11
   6   7   8   72.39   41.20
  -6  -7  -8  118.07   27.39
  -6   7  -8   87.40   31.32
   6   7   9   29.51   33.85
   6  -7   9   29.44   22.86
  -6  -7  -9    8.50   27.05
  -6   7  -9    3.51   25.25
   6   7  10  120.56   35.88
   6  -7  10   27.99   28.49
  -6  -7 -10   37.26   26.94
  -6   7 -10   92.28   33.23
  -6  -7 -11   52.21   34.54
   6   8 -15    9.05   31.57
   6  -8 -15   10.95   32.31
  -6  -8  15   23.99   30.67
   6   8 -14   22.43   30.93
   6  -8 -14   70.44   29.00
  -6  -8  14   54.03   26.63
  -6   8  14    9.57   29.19
   6   8 -13   35.65   29.72
   6  -8 -13   83.33   36.10
  -6   8  13   81.82   28.88
  -6  -8  13   58.08   31.90
   6   8 -12   -3.79   22.04
   6  -8 -12   41.13   25.11
  -6  -8  12    4.85   21.11
  -6   8  12   10.53   21.42
  -6   8  12   24.71   21.22
   6   8 -11   22.73   24.04
   6  -8 -11   68.95   31.13
  -6   8  11  109.30   25.48
  -6   8  11   21.34   28.97
  -6  -8  11   71.41   29.57
   6   8 -10   43.18   23.44
   6  -8 -10  140.99   34.45
  -6  -8  10   88.05   30.99
  -6  -8  10   77.14   19.81
  -6   8  10  110.76   23.65
  -6   8  10   92.03   30.14
   6   8  -9   -6.39   16.93
   6  -8  -9   57.00   22.97
  -6  -8   9    7.58   15.50
  -6  -8   9   18.02   19.26
  -6   8   9    5.31   15.50
  -6   8   9   39.44   18.42
   6   8  -8  120.71   18.52
   6  -8  -8  139.54   37.85
  -6  -8   8  102.19   27.03
  -6  -8   8  130.48   23.33
  -6   8   8  123.11   21.17
  -6   8   8   98.57   28.79
   6   8  -7   20.54   13.11
   6  -8  -7    7.24   28.20
  -6  -8   7   25.84   24.08
  -6  -8   7   18.96   18.28
  -6   8   7   18.61   11.78
  -6   8   7   45.81   21.79
   6   8  -6   40.69   21.22
   6  -8  -6   25.46   31.52
  -6  -8   6   95.59   20.98
  -6   8   6    9.49   22.80
   6   8  -5   42.49   23.22
   6  -8  -5   13.34   21.70
  -6  -8   5    5.80   14.91
   6   8  -4   56.33   27.01
   6  -8  -4   97.11   26.82
  -6  -8   4   64.50   23.11
  -6   8   4   67.80   20.64
   6   8  -3   49.73   24.77
   6  -8  -3   17.89   22.90
  -6  -8   3   34.22   16.99
  -6   8   3   28.98   22.15
   6   8  -2  146.48   28.01
   6  -8  -2  159.04   31.20
  -6  -8   2  172.03   24.75
  -6   8   2  154.09   24.78
   6   8  -1    8.42   22.18
   6  -8  -1    9.95   19.30
  -6   8   1    8.51   20.12
   6   8   0  263.06   34.49
   6  -8   0  353.99   43.77
  -6  -8   0  227.17   29.49
  -6   8   0  297.08   34.98
   6   8   1   52.68   25.26
   6  -8   1   93.14   33.10
  -6   8  -1   44.52   21.92
  -6  -8  -1   84.25   25.41
   6   8   2  -25.71   23.24
   6  -8   2   17.12   24.49
  -6  -8  -2  -13.63   15.20
  -6   8  -2    5.25   19.98
   6   8   3   48.98   25.64
   6  -8   3   68.69   26.89
  -6   8  -3   62.14   29.36
  -6  -8  -3   88.44   26.58
   6   8   4   -2.67   18.38
   6  -8   4   28.85   22.54
  -6  -8  -4  -20.87   18.43
  -6   8  -4   11.40   16.44
   6   8   5  133.67   30.80
   6  -8   5   67.88   28.42
  -6  -8  -5   95.40   25.28
  -6   8  -5  112.65   33.12
   6   8   6  -14.90   26.24
   6  -8   6    4.25   23.63
  -6  -8  -6   74.33   26.54
  -6   8  -6   44.25   28.96
   6   8   7   61.28   32.17
   6  -8   7  107.08   31.64
  -6   8  -7  126.00   38.55
  -6  -8  -7   91.53   34.95
   6   8   8   -3.00   34.61
   6  -8   8  120.30   30.59
  -6  -8  -8  -13.82   27.08
  -6   8  -8   -5.82   25.29
   6   8   9  177.74   49.38
   6  -8   9  106.10   45.22
  -6   8  -9  173.57   39.97
  -6  -8  -9  150.58   33.98
   6   8  10   32.71   32.86
   6  -8  10   59.23   29.40
  -6  -8 -10    5.58   30.75
  -6   8 -10   -7.49   29.64
   6   9 -14   87.78   30.03
   6  -9 -14  -33.05   32.31
  -6   9  14   17.20   23.72
  -6  -9  14   -8.24   23.77
   6   9 -13  -20.46   20.27
   6  -9 -13  -12.78   23.12
  -6   9  13   31.44   20.15
   6   9 -12   15.60   25.26
   6  -9 -12   -8.65   29.13
  -6  -9  12  104.23   29.59
  -6   9  12    0.05   23.14
  -6   9  12    6.23   24.30
   6   9 -11    0.27   19.58
   6  -9 -11    0.57   31.12
  -6  -9  11   61.71   28.88
  -6   9  11   -5.40   22.91
  -6   9  11   72.88   22.55
   6   9 -10    6.06   18.44
   6  -9 -10   18.20   29.69
  -6  -9  10    9.83   15.25
  -6  -9  10   59.45   26.10
  -6   9  10   -2.21   18.75
  -6   9  10   -8.46   23.63
   6   9  -9   -7.82   15.41
   6  -9  -9    0.34   23.51
  -6  -9   9   47.50   21.76
  -6  -9   9   15.83   15.83
  -6   9   9   16.37   16.86
  -6   9   9   -7.02   17.82
   6  -9  -8   -9.43   37.91
  -6  -9   8   97.97   23.74
  -6  -9   8   81.01   26.15
  -6   9   8   55.37   27.39
   6   9  -7  110.20   29.61
   6  -9  -7  105.36   40.74
  -6  -9   7  128.19   23.38
  -6   9   7   84.23   28.79
   6   9  -6   -4.52   24.82
   6  -9  -6   33.65   30.68
  -6  -9   6    0.84   16.65
  -6   9   6   42.27   21.97
   6   9  -5   32.63   24.19
   6  -9  -5   10.15   28.85
  -6  -9   5   43.31   20.55
  -6   9   5   75.17   21.18
   6   9  -4   13.42   18.39
   6  -9  -4  -17.29   20.33
  -6  -9   4   -3.48   15.23
  -6   9   4    3.13   14.53
   6   9  -3   52.17   29.08
   6  -9  -3   76.45   34.57
  -6   9   3   62.56   21.99
  -6  -9   3   45.67   22.99
   6   9  -2   37.72   23.09
   6  -9  -2   -0.26   30.82
  -6  -9   2    4.38   19.90
  -6   9   2   59.49   19.41
   6   9  -1    4.50   19.13
   6  -9  -1   17.03   19.79
  -6   9   1    1.57   16.27
  -6  -9   1   -2.15   16.01
   6   9   0   69.62   30.82
   6  -9   0  -11.84   33.64
  -6  -9   0   86.22   26.95
  -6   9   0   48.35   22.58
   6  -9   1   -7.03   27.06
  -6  -9  -1    0.12   20.95
  -6   9  -1   27.08   22.61
   6   9   2  244.16   43.26
   6  -9   2  319.21   47.90
  -6  -9  -2  236.69   33.17
  -6   9  -2  289.09   41.71
   6   9   3    0.24   31.24
   6  -9   3   86.98   33.11
  -6  -9  -3   10.70   25.80
  -6   9  -3   61.64   27.81
   6   9   4  161.18   42.10
   6  -9   4  129.94   35.44
  -6  -9  -4  173.70   34.37
  -6   9  -4  171.22   33.14
   6   9   5   25.22   29.37
  -6   9  -5   41.57   28.10
  -6  -9  -5  -19.87   24.59
   6   9   6  169.35   37.13
   6  -9   6  131.21   36.77
  -6  -9  -6  132.56   36.15
  -6   9  -6  136.93   41.28
   6   9   7   32.30   26.60
   6  -9   7  -15.88   24.05
  -6   9  -7    7.09   22.82
  -6  -9  -7   15.89   25.08
   6   9   8   91.88   47.63
   6  -9   8  111.26   45.03
  -6  -9  -8  103.56   37.26
  -6   9  -8  122.15   43.65
  -6 -10  13   71.24   38.77
  -6 -10  12   16.42   32.25
  -6  10  12   21.52   25.34
   6 -10 -11   -3.00   23.28
  -6 -10  11   15.20   27.79
  -6  10  11  -15.36   19.33
   6 -10 -10   90.92   39.91
  -6 -10  10   86.17   36.07
  -6  10  10   10.85   31.10
   6 -10  -9   76.75   31.21
  -6 -10   9   33.85   25.08
  -6 -10   9   10.46   19.34
  -6  10   9   69.04   23.99
   6  10  -8   36.74   34.58
   6 -10  -8   81.79   40.07
  -6 -10   8   66.40   27.14
  -6  10   8   72.79   28.96
   6 -10  -7   39.24   24.68
   6  10  -7   58.34   26.27
  -6 -10   7  -22.50   21.02
  -6  10   7  -15.75   18.55
   6  10  -6    0.86   31.69
   6 -10  -6  104.63   38.26
  -6 -10   6   59.24   26.53
  -6  10   6   20.97   27.25
   6 -10  -5  -32.72   31.79
   6  10  -5  -15.83   21.08
  -6 -10   5    0.52   18.27
  -6  10   5   -3.18   17.46
   6  10  -4   76.43   37.18
   6 -10  -4  101.25   44.81
  -6 -10   4   58.70   32.06
  -6  10   4  187.80   31.03
   6 -10  -3   61.73   39.65
   6  10  -3   67.87   28.32
  -6 -10   3   54.51   23.37
  -6  10   3   51.73   28.11
   6  10  -2  153.38   39.65
   6 -10  -2  127.69   37.69
  -6 -10   2   85.83   27.55
  -6  10   2  122.66   32.60
   6  10  -1   25.26   30.42
   6 -10  -1   33.63   32.47
  -6 -10   1   55.87   22.23
  -6  10   1   -6.38   26.53
   6  10   0   73.22   29.09
   6 -10   0  102.83   31.62
  -6 -10   0   63.37   26.43
  -6  10   0   64.94   26.13
   6 -10   1   -5.72   29.37
   6  10   1  -11.08   26.40
  -6 -10  -1   90.31   28.17
  -6  10  -1   73.86   27.65
   6  10   2   92.39   36.29
   6 -10   2  116.63   33.04
  -6 -10  -2   68.44   26.60
  -6  10  -2   69.18   33.83
   6 -10   3  124.64   47.41
   6  10   3  138.09   43.58
  -6 -10  -3  202.92   37.05
  -6  10  -3  148.91   39.56
   6  10   4  -22.41   23.13
   6 -10   4  106.69   31.97
  -6 -10  -4  -20.87   20.50
  -6  10  -4   18.91   21.72
   6 -10   5  109.49   45.12
   6  10   5   72.06   41.92
  -6 -10  -5  130.47   30.51
  -6  10  -5  124.85   35.33
   6  10   6   28.74   34.53
   6 -10   6   12.83   35.57
  -6 -10  -6    7.89   23.75
  -6  10  -6   18.57   26.67
   6  10   7   96.62   37.02
   6 -10   7   75.90   46.27
  -6 -10  -7   53.80   30.19
  -6  10  -7   72.60   34.41
   6 -11 -11  102.49   35.68
  -6 -11  11  -25.23   25.60
  -6  11  11   -4.77   27.62
   6  11 -10   58.32   38.50
   6 -11 -10  -26.39   42.89
  -6  11  10   84.53   27.80
   6  11  -9   76.50   32.48
   6 -11  -9   54.41   45.54
  -6 -11   9   66.15   30.80
  -6  11   9   18.19   31.48
   6  11  -8   78.77   33.80
   6 -11  -8   35.60   40.40
  -6 -11   8  -15.32   26.78
  -6  11   8    7.65   26.53
   6  11  -7   83.31   31.29
   6 -11  -7   22.97   35.82
  -6 -11   7   10.34   30.36
  -6  11   7   56.96   29.81
   6  11  -6    0.72   26.04
   6 -11  -6   65.21   35.71
  -6 -11   6   19.25   27.45
  -6  11   6    6.43   25.22
   6  11  -5  157.94   37.20
   6 -11  -5  112.90   48.72
  -6 -11   5  152.35   37.17
  -6  11   5  102.67   29.07
   6  11  -4   10.44   27.03
   6 -11  -4    4.35   30.74
  -6 -11   4   53.90   23.26
  -6  11   4   15.78   26.89
   6  11  -3  180.82   45.50
   6 -11  -3  138.57   51.48
  -6 -11   3  141.86   37.34
  -6  11   3  126.76   33.80
   6  11  -2   -5.86   24.04
   6 -11  -2   -5.05   32.31
  -6 -11   2   19.51   24.89
  -6  11   2   10.79   19.64
   6  11  -1  181.09   41.39
   6 -11  -1  149.81   47.07
  -6 -11   1   74.25   30.44
  -6  11   1   74.94   28.64
   6  11   0   89.11   30.95
   6 -11   0  -12.39   33.99
  -6 -11   0   65.07   30.72
  -6  11   0   26.24   30.36
   6 -11   1   55.35   34.47
   6  11   1   11.86   34.74
  -6 -11  -1   27.04   30.36
  -6  11  -1   61.14   31.93
   6  11   2   89.27   29.66
   6 -11   2   17.24   32.42
  -6 -11  -2   18.37   26.84
  -6  11  -2   20.49   31.87
   6 -11   3  146.42   50.08
   6  11   3  104.86   44.81
  -6 -11  -3   97.67   36.30
  -6  11  -3  117.08   39.45
   6  11   4   18.14   25.60
   6 -11   4   -3.91   27.66
  -6 -11  -4    6.84   21.39
  -6  11  -4   -2.95   27.22
   6  11   5   14.83   37.90
   6 -11   5   80.29   35.22
  -6 -11  -5   34.51   26.05
  -6  11  -5   -7.42   28.34
   6  12  -8   85.23   36.60
   6 -12  -8   30.00   52.13
  -6 -12   8  111.03   39.37
  -6  12   8  108.93   35.15
   6  12  -7   -8.14   31.76
   6 -12  -7    2.54   30.89
  -6 -12   7   23.86   22.08
  -6  12   7   -3.48   20.19
   6  12  -6   76.81   36.92
   6 -12  -6  126.68   43.58
  -6 -12   6   68.31   33.10
  -6  12   6  132.62   37.17
   6  12  -5   17.21   24.85
   6 -12  -5   16.02   34.84
  -6 -12   5   -4.44   27.11
  -6  12   5  -10.65   25.07
   6  12  -4  103.53   40.31
   6 -12  -4  187.13   49.02
  -6 -12   4  102.74   41.38
  -6  12   4  148.44   39.65
   6  12  -3  -25.22   25.94
   6 -12  -3   22.46   29.93
  -6 -12   3   15.73   27.49
  -6  12   3   15.41   24.97
   6  12  -2  192.40   50.27
   6 -12  -2  154.50   59.63
  -6 -12   2  147.54   37.33
  -6  12   2  215.30   44.03
   6  12  -1   17.89   34.83
   6 -12  -1   75.33   33.18
  -6 -12   1  -12.00   23.41
  -6  12   1    6.78   24.20
   6  12   0  151.80   39.81
   6 -12   0   84.60   44.59
  -6 -12   0  181.41   37.20
  -6  12   0   63.55   40.29
   6  12   1   44.76   24.82
   6 -12   1  -11.55   28.70
  -6 -12  -1   -8.78   21.62
  -6  12  -1   -9.33   27.02
   6  12   2   27.97   39.14
   6 -12   2   38.81   45.81
  -6 -12  -2    6.68   32.87
  -6  12  -2   69.73   35.64
   6  12   3   13.34   40.27
   6 -12   3    3.81   45.44
  -6 -12  -3   62.75   29.57
  -6  12  -3   39.73   30.06
   7   0 -18   19.34   26.52
  -7   0  18   -0.07   24.13
   7   0 -17   -5.13   21.87
  -7   0  17    9.85   18.65
   7   0 -16  233.55   45.08
  -7   0  16  206.75   34.42
   7   0 -15   65.80   29.74
  -7   0  15   20.37   21.79
   7   0 -14  162.08   31.12
  -7   0  14  197.02   34.04
   7   0 -13   20.22   17.47
  -7   0  13   -8.68   17.97
   7   0 -12  103.31   29.61
  -7   0  12  128.97   21.91
   7   0 -11  -14.54   23.08
  -7   0  11   59.68   18.77
   7   0 -10   81.57   10.34
   7   0 -10  103.78   26.47
  -7   0  10   84.30   20.94
   7   0  -9   -1.88    7.33
   7   0  -9   54.72   16.40
  -7   0   9  -14.05   12.78
   7   0  -8  860.87   31.97
  -7   0   8  911.01   43.65
  -7   0   8  872.36   40.71
   7   0  -7  -10.22    9.73
  -7   0   7    0.52   11.81
  -7   0   7   -4.88   11.31
   7   0  -6 1598.16   49.94
  -7   0   6 1574.36   57.94
  -7   0   6 1679.27   52.17
  -7   0   5   13.42   11.02
  -7   0   5   77.95   14.43
  -7   0   5   20.70   13.14
  -7   0   4 1897.62   49.62
  -7   0   4 1883.29   58.48
  -7   0   4 1806.40   58.56
  -7   0   3   20.81    7.64
  -7   0   3    3.69   10.28
  -7   0   3    4.41   10.37
   7   0  -2  299.91   18.38
  -7   0   2  281.26   25.64
  -7   0   2  297.07   22.87
   7   0  -1   17.01    8.99
  -7   0   1   -2.57   11.23
  -7   0   1   15.65   12.12
   7   0   0  378.69   21.40
  -7   0   0  321.66   22.69
  -7   0   0  354.97   29.76
   7   0   1    4.44    9.77
  -7   0  -1   36.03   14.77
  -7   0  -1   -6.23   12.02
   7   0   2  125.64   14.91
  -7   0  -2  128.85   19.96
  -7   0  -2   90.97   16.03
   7   0   3   -3.01   10.10
  -7   0  -3   -6.33   11.91
  -7   0  -3    4.65   12.13
   7   0   4   87.73   17.37
  -7   0  -4  102.57   20.61
  -7   0  -4   71.99   20.35
   7   0   5    7.40    9.93
  -7   0  -5   -6.70   11.77
  -7   0  -5   -2.19   11.29
   7   0   6  127.34   22.15
  -7   0  -6  102.73   25.16
  -7   0  -6  113.30   23.48
   7   0   7   -2.04   15.29
  -7   0  -7    9.48   18.99
  -7   0  -7   33.12   20.63
   7   0   8    7.31   13.69
  -7   0  -8  -14.53   15.88
  -7   0  -8    3.04   15.21
   7   0   9   31.05   20.01
  -7   0  -9   -2.00   16.92
   7   0  10   54.60   26.47
   7   0  10   22.09   28.95
  -7   0 -10   67.54   28.83
   7   0  11  -13.33   21.88
   7   0  11  -13.01   20.74
  -7   0 -11   11.31   19.14
   7   0  12  112.78   35.20
  -7   0 -12   49.32   36.97
   7  -1 -18   66.17   36.99
   7   1 -18   -4.68   35.03
  -7  -1  18   19.65   26.24
  -7   1  18   31.25   26.72
   7   1 -17   81.24   29.04
   7  -1 -17   30.37   35.15
  -7  -1  17    9.58   24.17
  -7   1  17   30.57   31.02
   7   1 -16   60.03   35.47
   7  -1 -16   23.52   34.55
  -7  -1  16   26.79   29.72
  -7   1  16  104.63   30.60
   7   1 -15  220.26   41.75
   7  -1 -15  118.24   41.62
  -7  -1  15  193.52   31.30
  -7   1  15  221.40   37.84
   7  -1 -14   47.21   23.14
   7   1 -14   63.72   26.90
  -7  -1  14   22.33   23.62
  -7   1  14   -4.76   18.91
   7   1 -13  212.87   35.47
   7  -1 -13  193.27   37.11
  -7  -1  13  182.49   31.50
  -7   1  13  224.66   32.00
   7   1 -12    0.37   20.84
   7  -1 -12    0.59   17.35
  -7  -1  12    8.09   14.31
  -7   1  12   20.31   17.04
   7   1 -11  190.24   27.20
   7  -1 -11  205.26   28.85
  -7  -1  11  209.91   24.52
  -7   1  11  155.63   26.35
   7  -1 -10    7.25    9.16
   7   1 -10   14.15    6.49
   7   1 -10   56.52   20.12
   7  -1 -10   49.74   17.08
  -7  -1  10    5.76   17.05
  -7   1  10    7.24   15.72
   7   1  -9  490.33   38.45
   7  -1  -9  427.75   23.33
   7   1  -9  465.61   21.24
  -7  -1   9  432.95   32.98
  -7   1   9  468.73   31.60
  -7   1   9  448.73   37.43
   7   1  -8   41.92   16.83
   7  -1  -8   70.40   12.93
  -7  -1   8   31.10   13.29
  -7  -1   8   22.08    9.25
  -7   1   8   40.94   20.24
  -7   1   8   37.72   14.83
   7  -1  -7  716.32   30.99
  -7  -1   7  730.92   39.28
  -7  -1   7  714.48   30.63
  -7  -1   7  638.45   35.74
  -7   1   7  651.44   31.40
  -7   1   7  646.01   40.50
   7  -1  -6   34.33   12.75
  -7  -1   6   21.38   13.62
  -7  -1   6   33.86   12.14
  -7  -1   6   24.71   15.01
  -7   1   6   32.69   15.97
  -7   1   6   13.27   10.98
   7  -1  -5  627.17   30.33
  -7  -1   5  691.10   32.17
  -7  -1   5  617.80   33.31
  -7  -1   5  647.82   31.31
  -7   1   5  611.57   36.52
  -7   1   5  659.51   26.18
   7  -1  -4   41.10   15.22
  -7  -1   4   42.39   13.13
  -7  -1   4   56.29   13.26
  -7   1   4   42.24   13.85
  -7   1   4   23.47    7.76
  -7  -1   4   41.43   11.97
   7   1  -3  412.89   24.90
   7  -1  -3  413.90   29.11
  -7  -1   3  407.50   27.20
  -7  -1   3  429.62   25.55
  -7   1   3  449.66   18.80
  -7   1   3  399.41   25.97
   7  -1  -2  174.71   20.29
   7   1  -2  148.76   17.97
   7  -1  -2  162.57   12.71
  -7  -1   2  166.14   17.88
  -7  -1   2  138.28   16.95
  -7   1   2  217.01   22.04
   7  -1  -1   91.92   16.98
   7   1  -1  106.50   14.55
   7  -1  -1   58.84    9.81
  -7  -1   1   58.92   17.99
  -7  -1   1   66.16   13.67
  -7   1   1   87.11   14.95
   7   1   0  358.66   24.12
   7  -1   0  407.95   17.45
  -7  -1   0  388.95   31.06
  -7  -1   0  419.86   24.41
  -7   1   0  435.56   29.98
   7   1   1  113.69   17.87
   7  -1   1  118.54   10.95
  -7  -1  -1  109.15   22.03
  -7  -1  -1  116.49   16.86
  -7   1  -1  125.45   19.43
  -7   1  -1  104.56   17.51
   7  -1   2  250.78   17.34
   7   1   2  258.08   23.84
  -7  -1  -2  239.28   25.44
  -7  -1  -2  282.67   23.04
  -7   1  -2  312.17   27.05
  -7   1  -2  279.84   26.54
   7   1   3   83.22   19.75
   7  -1   3  117.77   12.95
  -7  -1  -3  139.74   18.37
  -7   1  -3   62.62   15.02
  -7   1  -3  111.42   19.13
  -7  -1  -3   96.17   18.64
   7   1   4  154.99   22.68
   7  -1   4  128.34   15.77
  -7  -1  -4  143.42   21.70
  -7   1  -4  127.07   24.32
  -7  -1  -4  160.60   25.43
   7   1   5   -4.50   15.35
   7  -1   5   10.53   11.23
   7  -1   5   10.18   15.61
  -7  -1  -5   20.94   12.13
  -7  -1  -5    5.65   13.55
  -7   1  -5    4.29   16.19
   7  -1   6   56.30   18.70
   7   1   6   19.58   20.42
   7  -1   6   35.81   13.44
  -7  -1  -6   22.11   17.70
  -7  -1  -6   74.85   18.53
  -7   1  -6   35.64   21.86
   7   1   7   44.48   18.00
   7  -1   7  -16.60   15.92
   7  -1   7   -6.87   11.52
  -7  -1  -7   44.42   16.22
  -7  -1  -7   -8.87   17.95
  -7   1  -7    0.21   18.61
   7   1   8  121.27   27.34
   7  -1   8  114.12   31.18
   7  -1   8  110.61   23.71
  -7  -1  -8  106.70   29.56
  -7   1  -8  139.73   30.20
  -7  -1  -8  138.77   26.15
   7  -1   9   33.26   20.45
   7   1   9   -4.20   21.94
   7  -1   9   45.70   16.69
  -7  -1  -9   -4.29   21.25
  -7  -1  -9   17.26   20.24
  -7   1  -9    5.34   19.26
   7  -1  10  114.52   34.19
   7   1  10  141.60   33.44
  -7  -1 -10  104.94   30.29
  -7  -1 -10   65.07   25.85
  -7   1 -10  136.50   30.12
   7   1  11   75.73   30.33
   7  -1  11    7.03   28.14
  -7  -1 -11   39.68   27.86
  -7  -1 -11    8.97   23.65
  -7   1 -11   85.53   32.91
   7   1  12   23.96   27.58
   7  -1  12   27.57   27.17
  -7   1 -12  -17.88   31.81
   7   2 -18  -34.15   31.24
   7  -2 -18    6.62   24.28
  -7  -2  18    7.44   25.85
  -7   2  18   17.18   22.25
   7   2 -17    9.57   27.44
   7  -2 -17   79.90   27.47
  -7  -2  17   18.35   29.06
  -7   2  17  -21.87   29.31
   7   2 -16   -0.63   30.54
   7  -2 -16   12.62   26.36
  -7   2  16   43.20   29.60
  -7  -2  16   65.34   23.86
   7   2 -15   19.01   19.94
   7  -2 -15  -17.21   24.35
  -7  -2  15    2.52   20.12
  -7   2  15    7.85   21.19
   7   2 -14  114.39   33.27
   7  -2 -14   64.23   27.35
  -7   2  14  111.33   29.47
  -7  -2  14   81.49   28.89
   7  -2 -13   23.33   26.68
  -7  -2  13   87.09   23.38
  -7   2  13   11.86   19.20
   7   2 -12  129.48   28.49
   7  -2 -12   79.07   30.32
  -7  -2  12   62.20   24.51
  -7   2  12  108.55   24.51
   7   2 -11    7.31   14.53
   7  -2 -11  -12.03   15.79
   7  -2 -11    0.09    6.17
  -7  -2  11   -8.52   13.09
  -7   2  11    7.19    9.87
   7  -2 -10  128.86   14.53
   7   2 -10  132.47   28.29
  -7   2  10  140.04   27.89
  -7   2  10  131.40   22.34
  -7  -2  10  162.84   25.97
   7   2  -9   20.59   19.68
   7  -2  -9   27.38   12.33
  -7  -2   9   23.01    9.61
  -7  -2   9   39.01   18.76
  -7   2   9   66.85   18.90
  -7   2   9   35.78   15.19
   7   2  -8  123.64   24.77
   7  -2  -8  126.47   16.77
  -7  -2   8  125.22   13.21
  -7  -2   8   97.88   22.26
  -7   2   8  149.24   21.73
  -7   2   8  100.33   17.67
   7   2  -7   57.90   19.19
   7  -2  -7   73.30   16.83
  -7  -2   7   67.90   19.20
  -7  -2   7   64.58   13.40
  -7   2   7   59.76   13.41
  -7   2   7   84.81   17.54
   7  -2  -6  231.03   23.50
  -7  -2   6  265.03   25.11
  -7  -2   6  231.39   22.72
  -7  -2   6  278.31   20.30
  -7   2   6  211.42   16.89
  -7   2   6  202.72   26.43
   7  -2  -5  133.70   21.29
  -7   2   5  198.28   21.64
  -7  -2   5  196.01   21.62
  -7  -2   5  184.25   19.96
  -7  -2   5  197.63   17.44
  -7   2   5  207.21   14.47
   7  -2  -4  172.94   19.34
  -7  -2   4  175.26   20.76
  -7  -2   4  204.84   21.22
  -7  -2   4  190.59   18.64
  -7   2   4  179.33   11.38
  -7   2   4  188.17   22.88
   7   2  -3   59.15   13.03
   7  -2  -3   57.58   18.55
  -7  -2   3   47.93   13.93
  -7  -2   3   82.95   12.81
  -7   2   3   58.07    7.38
  -7   2   3   54.45   15.07
   7  -2  -2   39.93   14.33
   7   2  -2   19.92   14.20
   7  -2  -2   35.34    6.65
  -7  -2   2   16.96   10.24
  -7   2   2   37.47   13.97
  -7  -2   2   32.27   15.47
   7   2  -1  531.87   32.27
   7  -2  -1  510.39   16.42
   7  -2  -1  578.30   36.70
  -7  -2   1  501.86   34.91
  -7  -2   1  545.61   25.01
  -7   2   1  581.22   34.64
   7   2   0   38.04   13.90
   7  -2   0   -0.21   16.41
   7  -2   0   12.00    5.28
  -7   2   0   23.70   15.79
  -7  -2   0   22.03   15.80
  -7  -2   0   19.15    8.56
   7   2   1  477.43   32.77
   7  -2   1  545.47   35.51
   7  -2   1  482.57   16.76
  -7  -2  -1  535.98   25.40
  -7   2  -1  498.60   35.24
  -7  -2  -1  530.15   33.05
   7   2   2   40.23   15.87
   7  -2   2   63.82   17.89
   7  -2   2   10.30    5.60
  -7  -2  -2   14.05    9.43
  -7   2  -2    2.71   16.77
  -7  -2  -2   13.08   14.84
   7  -2   3  584.41   44.32
   7   2   3  677.87   40.02
   7  -2   3  607.64   22.46
  -7  -2  -3  625.48   36.71
  -7  -2  -3  593.77   27.89
  -7   2  -3  627.98   41.96
   7   2   4   -7.59   15.07
   7  -2   4  -12.62   13.91
   7  -2   4   17.81    6.69
  -7  -2  -4  -11.71   10.10
  -7   2  -4   -5.25   12.80
   7  -2   5   34.56   21.19
   7  -2   5   11.27    8.99
  -7  -2  -5    3.13   12.82
  -7  -2  -5   58.40   16.30
  -7   2  -5   42.01   15.79
   7   2   6   53.78   22.42
   7  -2   6   40.65   19.37
   7  -2   6   41.31   11.26
  -7  -2  -6   19.61   15.85
  -7  -2  -6   70.90   22.42
  -7   2  -6   65.47   24.25
   7   2   7  288.74   36.88
   7  -2   7  253.56   31.09
   7  -2   7  228.03   20.19
  -7  -2  -7  284.21   28.61
  -7  -2  -7  270.68   34.63
  -7   2  -7  236.44   37.45
   7   2   8   59.28   26.10
   7  -2   8   52.18   26.32
  -7  -2  -8   22.67   17.20
  -7  -2  -8   14.53   19.41
  -7   2  -8   61.00   23.16
   7   2   9  309.23   41.19
   7  -2   9  328.60   40.02
  -7  -2  -9  306.66   34.88
  -7   2  -9  303.65   44.80
  -7  -2  -9  283.98   33.44
   7   2  10  -14.28   21.53
   7  -2  10    2.56   16.34
  -7  -2 -10    0.75   16.20
  -7  -2 -10  -12.27   15.96
  -7   2 -10   24.65   22.75
   7   2  11  196.32   35.90
   7  -2  11  165.44   36.80
  -7  -2 -11  201.78   37.40
  -7   2 -11  117.75   43.60
   7   2  12   84.25   37.32
   7  -2  12   40.32   31.00
  -7   2 -12   66.35   41.20
  -7  -2 -12   42.24   33.71
   7   3 -18  -13.82   28.46
   7  -3 -18  -28.84   34.48
  -7  -3  18    2.63   23.85
  -7   3  18  -24.58   30.60
   7   3 -17   42.10   37.54
   7  -3 -17   30.52   30.97
  -7   3  17   65.59   32.87
  -7  -3  17   32.32   26.32
   7   3 -16   82.73   30.40
   7  -3 -16   14.38   31.47
  -7  -3  16   -6.94   25.15
  -7   3  16    7.86   28.13
   7   3 -15   66.88   26.18
   7  -3 -15   23.59   31.24
  -7   3  15   47.13   22.82
  -7  -3  15    4.52   26.82
   7   3 -14   28.65   29.89
   7  -3 -14   71.21   30.16
  -7  -3  14    4.94   27.37
  -7   3  14   72.91   22.52
   7   3 -13   35.46   21.23
   7  -3 -13    9.20   21.91
  -7  -3  13    1.62   18.17
  -7   3  13   50.75   21.83
   7   3 -12   13.81   23.31
   7  -3 -12    1.85   20.41
  -7  -3  12   18.21   21.01
  -7   3  12   58.94   17.05
   7   3 -11    1.18   18.72
   7  -3 -11   11.55    9.92
  -7   3  11    7.82   11.26
  -7   3  11   -2.11   13.05
  -7  -3  11   29.46   17.91
   7   3 -10   38.72   16.27
   7  -3 -10   25.93   12.74
  -7  -3  10   23.57    7.82
  -7  -3  10    8.76   16.25
  -7   3  10   39.04   21.74
  -7   3  10   57.15   16.96
   7   3  -9  -12.87   14.68
   7  -3  -9    0.51   11.84
  -7  -3   9    0.89    7.68
  -7  -3   9   26.73   12.23
  -7   3   9   12.77   14.44
  -7   3   9   -1.14   11.96
   7   3  -8   61.17   19.69
   7  -3  -8   78.49   16.08
  -7  -3   8   42.18   20.59
  -7  -3   8   54.40   11.53
  -7   3   8   81.18   20.39
  -7   3   8   69.17   15.15
   7   3  -7   22.61   13.34
   7  -3  -7    9.78   13.47
  -7  -3   7   -5.29   15.13
  -7  -3   7   15.27   10.44
  -7   3   7    5.62    9.50
  -7   3   7    8.13   13.66
   7   3  -6  218.79   21.88
   7  -3  -6  184.41   20.22
  -7  -3   6  189.54   20.27
  -7  -3   6  131.38   23.73
  -7   3   6  186.21   14.95
  -7   3   6  185.13   23.43
  -7  -3   5    6.33    9.16
  -7  -3   5    4.55   13.45
  -7   3   5   -0.60    5.54
  -7   3   5   40.65   14.78
   7  -3  -4 1169.07   50.36
  -7  -3   4 1198.00   39.39
  -7  -3   4 1173.14   47.00
  -7  -3   4 1200.39   50.78
  -7   3   4 1182.05   28.69
  -7   3   4 1135.25   49.68
   7   3  -3   37.30   14.15
   7  -3  -3   37.03   18.39
  -7  -3   3   57.73   15.71
  -7   3   3   23.79    5.14
  -7   3   3   14.46   17.84
  -7  -3   3   55.40   10.62
   7   3  -2  650.73   37.03
   7  -3  -2  667.57   38.30
  -7  -3   2  613.15   36.78
  -7  -3   2  616.44   23.61
  -7   3   2  596.43   38.83
   7   3  -1   14.93   16.54
   7  -3  -1   52.41   16.66
  -7  -3   1   60.04   14.54
  -7  -3   1   23.26    8.67
  -7   3   1   38.55   18.78
   7   3   0  824.15   39.48
   7  -3   0  776.37   40.94
  -7  -3   0  806.49   44.01
  -7  -3   0  828.29   27.70
  -7   3   0  807.81   44.26
   7   3   1  -17.48   14.53
   7  -3   1   10.82   12.75
  -7  -3  -1   -4.16    5.44
  -7   3  -1    3.30   11.40
  -7  -3  -1   -1.75   11.08
   7   3   2  889.17   43.42
   7  -3   2  918.42   51.47
  -7  -3  -2  952.96   47.01
  -7  -3  -2  854.92   30.24
  -7   3  -2  854.05   44.59
   7  -3   3   44.41   22.81
   7   3   3   33.04   18.06
  -7  -3  -3   45.16   17.64
  -7  -3  -3   44.62    9.69
  -7   3  -3   40.83   21.62
   7   3   4  148.32   27.65
   7  -3   4  130.66   28.54
  -7  -3  -4  183.78   29.00
  -7  -3  -4  167.60   14.76
  -7   3  -4  158.26   28.08
   7   3   5   40.10   16.00
   7  -3   5   28.70   19.10
  -7  -3  -5  -10.50   10.52
  -7   3  -5    0.00   18.84
  -7  -3  -5   12.37   15.03
   7   3   6  473.25   37.39
   7  -3   6  383.02   38.32
  -7  -3  -6  379.45   39.35
  -7  -3  -6  391.89   26.39
  -7   3  -6  394.10   37.35
   7  -3   7   11.36   15.73
  -7  -3  -7   12.82   12.31
  -7  -3  -7  -22.36   19.14
  -7   3  -7    4.89   21.93
   7   3   8  304.94   37.17
   7  -3   8  273.89   34.40
  -7   3  -8  330.05   42.40
  -7  -3  -8  267.49   38.30
   7   3   9  -12.93   20.43
   7  -3   9   32.98   21.93
  -7  -3  -9    2.57   22.29
  -7   3  -9    8.25   24.94
   7   3  10  159.95   41.32
   7  -3  10  186.76   36.32
  -7  -3 -10  196.97   38.35
  -7   3 -10  170.61   42.06
   7   3  11   72.93   34.70
   7  -3  11   21.40   29.68
  -7  -3 -11   15.21   28.48
  -7   3 -11   28.68   33.82
   7   3  12    2.16   29.66
  -7  -3 -12   42.14   31.07
   7   4 -17  -15.07   25.40
   7  -4 -17  -12.81   30.80
  -7   4  17   10.30   28.00
  -7  -4  17  -14.99   21.37
   7   4 -16   82.26   30.56
   7  -4 -16   38.61   33.38
  -7  -4  16   83.25   33.23
  -7   4  16  153.58   34.77
   7   4 -15   66.23   28.70
   7  -4 -15   92.16   36.34
  -7  -4  15   77.88   31.66
  -7   4  15   66.58   31.69
   7   4 -14   29.69   22.47
   7  -4 -14   23.61   28.25
  -7  -4  14   -1.85   23.44
  -7   4  14   29.94   19.72
   7   4 -13   51.39   23.42
   7  -4 -13   58.63   24.42
  -7  -4  13   48.80   21.97
  -7   4  13   45.64   20.44
   7   4 -12   75.32   23.79
   7  -4 -12   19.14   22.50
  -7  -4  12    4.31   23.30
  -7   4  12   42.56   21.36
   7   4 -11   71.28   24.37
   7  -4 -11   56.26   16.47
  -7   4  11   56.24   25.11
  -7   4  11   57.92   20.26
  -7  -4  11   46.06   20.08
   7   4 -10   93.17   20.97
   7  -4 -10   65.18   20.10
  -7  -4  10   99.52   11.87
  -7  -4  10  126.06   24.80
  -7   4  10  109.81   23.42
  -7   4  10   97.25   21.11
   7   4  -9    4.75   16.46
   7  -4  -9   17.40   15.89
  -7  -4   9   25.14   18.42
  -7  -4   9    2.26    8.67
  -7   4   9   80.84   19.52
  -7   4   9   -0.79   13.05
   7   4  -8   98.40   20.38
   7  -4  -8   99.96   20.76
  -7  -4   8   94.13   15.03
  -7   4   8   85.76   20.65
  -7   4   8   57.39   15.45
  -7  -4   8   82.66   22.77
   7   4  -7   24.07   13.61
   7  -4  -7   20.16   14.06
  -7  -4   7   12.83   12.66
  -7  -4   7   28.39   18.40
  -7   4   7   17.47   15.93
  -7   4   7   21.02   10.03
   7   4  -6  127.72   17.90
   7  -4  -6  111.40   19.74
  -7  -4   6  114.36   21.69
  -7  -4   6  151.51   16.60
  -7   4   6  132.25   11.43
  -7   4   6  121.47   21.66
   7  -4  -5  182.44   26.74
   7   4  -5  188.92   18.34
  -7  -4   5  273.01   24.97
  -7  -4   5  222.80   22.83
  -7   4   5  213.52   11.81
  -7   4   5  243.01   29.24
   7   4  -4   34.07   19.80
   7  -4  -4   22.69   16.40
   7   4  -4   37.19   11.63
  -7  -4   4   64.88   16.11
  -7   4   4   29.16   19.43
   7   4  -3  291.34   27.28
   7   4  -3  268.29   17.15
   7  -4  -3  252.42   30.10
  -7   4   3  257.01   27.19
  -7  -4   3  246.89   25.25
   7   4  -2  152.73   21.46
   7  -4  -2  142.14   28.07
  -7  -4   2  140.69   10.73
  -7  -4   2  172.46   20.85
  -7   4   2  131.82   25.02
   7   4  -1   75.82   16.54
   7  -4  -1   37.47   16.32
  -7  -4   1   23.13    7.74
  -7  -4   1    8.12   17.25
  -7   4   1    4.30   18.90
   7   4   0   92.34   18.97
   7  -4   0   48.69   24.47
  -7  -4   0   68.80   17.91
  -7  -4   0   71.14    8.59
  -7   4   0  107.28   19.00
   7   4   1   51.26   17.06
   7  -4   1   12.72   18.41
  -7  -4  -1   31.15    6.05
  -7   4  -1   24.47   16.04
  -7  -4  -1   47.99   15.86
   7   4   2  148.51   27.38
   7  -4   2  198.30   25.59
  -7  -4  -2  118.79   22.07
  -7   4  -2   85.50   21.42
   7   4   3  154.82   28.29
   7  -4   3   92.09   23.43
  -7   4  -3  148.44   24.35
  -7  -4  -3   99.62   26.49
   7   4   4  255.27   34.00
   7  -4   4  275.32   34.22
  -7  -4  -4  231.31   32.50
  -7   4  -4  281.09   30.34
   7   4   5  183.21   34.89
   7  -4   5  216.81   28.56
  -7  -4  -5  251.23   32.24
  -7   4  -5  176.27   34.86
   7   4   6   33.83   18.86
   7  -4   6  -16.32   17.40
  -7  -4  -6   -3.25   13.79
  -7   4  -6   -1.96   15.03
   7   4   7  240.68   33.61
   7  -4   7  190.09   31.61
  -7   4  -7  159.43   32.49
  -7  -4  -7  206.28   30.22
   7   4   8    7.88   18.47
   7  -4   8   10.28   20.77
  -7  -4  -8   -6.14   15.37
  -7   4  -8    1.38   22.39
   7   4   9  212.49   36.83
   7  -4   9  127.73   37.54
  -7   4  -9  204.88   43.18
  -7  -4  -9  174.59   30.39
   7   4  10    3.85   20.90
   7  -4  10    4.09   18.93
  -7  -4 -10    8.01   22.29
  -7   4 -10   -3.16   26.70
   7   4  11    0.53   36.22
   7  -4  11   13.68   32.00
  -7   4 -11   32.30   35.47
  -7  -4 -11   65.66   30.80
   7   5 -17   64.32   32.87
   7  -5 -17   38.20   40.24
  -7  -5  17   77.65   35.02
  -7   5  17   65.46   30.03
   7   5 -16    0.08   30.45
   7  -5 -16   25.76   33.59
  -7  -5  16   28.93   28.51
  -7   5  16   17.68   29.90
   7   5 -15  139.21   40.68
   7  -5 -15  183.86   43.48
  -7  -5  15  106.19   35.90
  -7   5  15  178.42   37.51
   7   5 -14   -7.86   25.29
   7  -5 -14   12.31   23.05
  -7   5  14   20.58   23.61
  -7  -5  14   31.26   25.56
   7   5 -13  221.19   38.93
   7  -5 -13  244.76   38.30
  -7  -5  13  229.58   34.47
  -7   5  13  311.24   37.94
   7   5 -12    4.69   19.41
   7  -5 -12    0.22   17.70
  -7  -5  12   46.59   19.27
  -7   5  12   46.70   20.13
  -7   5  12    7.02   14.43
   7   5 -11  170.37   31.17
   7  -5 -11  129.29   25.38
  -7  -5  11  152.08   27.31
  -7   5  11  260.33   28.61
  -7   5  11  245.68   36.04
   7   5 -10   37.21   21.79
   7  -5 -10   87.15   22.40
  -7  -5  10   53.84   11.79
  -7   5  10  100.55   26.52
  -7   5  10   39.49   19.25
  -7  -5  10   43.20   24.49
   7   5  -9  351.48   31.56
   7  -5  -9  388.35   34.53
  -7  -5   9  287.92   35.72
  -7  -5   9  349.74   23.47
  -7   5   9  278.55   31.89
  -7   5   9  327.45   26.70
   7   5  -8    6.45   13.97
  -7  -5   8    3.92   10.84
  -7  -5   8    9.03   17.33
  -7   5   8   17.51   14.14
  -7   5   8    3.24    9.18
   7  -5  -7  326.05   31.11
   7   5  -7  286.96   25.68
  -7  -5   7  331.93   35.77
  -7  -5   7  358.56   26.23
  -7   5   7  310.57   31.22
  -7   5   7  334.00   20.74
   7   5  -6   25.36   12.46
   7  -5  -6   68.43   22.13
  -7  -5   6    4.46   19.55
  -7  -5   6   18.90   11.67
  -7   5   6   26.00    7.99
  -7   5   6   48.67   19.91
   7   5  -5  138.41   13.96
   7  -5  -5  120.74   23.61
  -7  -5   5  170.56   23.11
  -7   5   5  139.91   23.12
  -7  -5   5  140.72   21.72
   7   5  -4   16.67    7.79
   7   5  -4   45.59   17.44
   7  -5  -4   56.32   21.69
  -7  -5   4   17.35   15.62
  -7   5   4   25.27   18.03
   7   5  -3  211.55   27.13
   7   5  -3  227.26   14.01
   7  -5  -3  240.02   27.51
  -7  -5   3  257.52   26.39
  -7   5   3  198.49   29.78
   7   5  -2   28.81   24.97
   7  -5  -2   97.18   22.16
  -7   5   2   89.68   20.96
  -7  -5   2   83.25   17.43
   7   5  -1   16.08   14.92
   7  -5  -1   -1.26   18.13
  -7  -5   1   20.91   15.88
  -7   5   1  -11.57   17.14
   7   5   0  366.58   37.47
   7  -5   0  412.37   35.51
  -7   5   0  414.79   33.82
  -7  -5   0  443.53   34.11
   7   5   1    9.60   20.99
  -7  -5  -1   34.72   18.33
  -7   5  -1    7.29   15.44
   7   5   2 1152.15   55.89
   7  -5   2 1225.45   63.12
  -7  -5  -2 1108.75   57.45
  -7   5  -2 1114.11   60.39
   7   5   3  197.38   32.34
   7  -5   3  183.95   28.66
  -7  -5  -3  174.57   26.35
  -7   5  -3  164.61   32.06
   7   5   4  875.67   52.09
   7  -5   4  884.85   56.67
  -7  -5  -4  769.49   52.05
  -7   5  -4  915.57   59.37
   7  -5   5   15.47   18.65
  -7  -5  -5    0.44   17.34
  -7   5  -5   36.63   24.64
   7   5   6  202.67   37.83
   7  -5   6  183.40   31.96
  -7  -5  -6  265.83   31.16
  -7   5  -6  241.25   34.36
   7   5   7   39.42   26.39
   7  -5   7   -3.94   23.57
  -7  -5  -7    4.45   18.54
   7   5   8   69.02   32.92
   7  -5   8  124.20   33.77
  -7  -5  -8  132.85   29.17
  -7   5  -8  120.83   31.68
   7   5   9  131.38   38.87
   7  -5   9   74.36   32.64
  -7  -5  -9   74.37   27.33
  -7   5  -9   94.15   39.79
   7   5  10    1.94   32.10
   7  -5  10   42.35   26.36
  -7  -5 -10  -20.33   27.03
  -7   5 -10   20.08   31.57
   7   5  11   11.98   37.69
   7  -5  11   20.97   32.38
  -7  -5 -11   66.08   32.02
  -7   5 -11   24.04   32.07
   7   6 -16  235.38   47.48
   7  -6 -16  216.29   42.68
  -7  -6  16  200.57   40.28
  -7   6  16  218.76   38.72
   7   6 -15   61.16   23.86
   7  -6 -15   17.35   32.10
  -7  -6  15  -22.82   22.83
   7   6 -14  235.79   41.31
   7  -6 -14  197.42   45.57
  -7  -6  14  275.23   42.59
  -7   6  14  244.46   39.09
   7   6 -13   -6.57   23.69
   7  -6 -13   -7.25   27.33
  -7   6  13   55.60   23.83
   7   6 -12  303.20   38.00
   7  -6 -12  259.45   32.33
  -7  -6  12  262.31   34.84
  -7   6  12  389.40   38.63
  -7   6  12  306.29   43.24
   7   6 -11   20.57   22.24
   7  -6 -11   58.92   22.63
  -7  -6  11   11.61   20.02
  -7   6  11   44.24   21.20
  -7   6  11   33.81   25.89
   7   6 -10  451.56   37.22
   7  -6 -10  357.27   39.92
  -7  -6  10  380.52   26.20
  -7   6  10  370.66   31.67
  -7   6  10  400.84   38.61
  -7  -6  10  424.04   43.28
   7   6  -9    5.22   15.44
   7  -6  -9    8.77   20.50
  -7  -6   9   -9.15   12.21
  -7  -6   9   22.36   19.91
  -7   6   9   32.21   12.41
  -7   6   9   31.05   20.79
   7   6  -8  309.85   26.99
   7  -6  -8  268.48   34.91
  -7  -6   8  274.74   35.61
  -7  -6   8  243.31   24.13
  -7   6   8  253.14   22.39
  -7   6   8  275.59   30.58
   7   6  -7   90.89   15.65
   7  -6  -7   61.07   26.30
  -7  -6   7   68.87   17.58
  -7  -6   7   40.15   20.40
  -7   6   7   80.65   19.55
  -7   6   7   25.48   12.01
   7   6  -6   32.67   11.22
   7  -6  -6   52.74   20.41
  -7  -6   6   35.97   17.02
  -7   6   6   33.33   18.61
  -7  -6   6   43.99   19.37
   7   6  -5   -0.05    7.72
   7   6  -5  -17.19   13.83
   7  -6  -5   14.89   15.58
  -7  -6   5    5.63   10.44
  -7   6   5   22.94   15.77
   7   6  -4  246.42   33.52
   7  -6  -4  211.64   35.38
  -7  -6   4  243.18   23.48
  -7   6   4  163.94   26.48
   7   6  -3    7.63   16.21
   7  -6  -3  -19.54   14.67
  -7  -6   3   -1.24   13.41
  -7   6   3   14.84   12.56
   7   6  -2  881.24   49.59
   7  -6  -2  843.19   49.94
  -7  -6   2  845.46   44.53
  -7   6   2  831.21   52.14
   7   6  -1  163.52   27.84
   7  -6  -1  188.79   32.01
  -7  -6   1  151.12   26.42
  -7   6   1  144.53   28.77
   7   6   0  346.95   34.54
   7  -6   0  372.23   35.88
  -7  -6   0  343.05   34.35
  -7   6   0  430.31   38.51
   7   6   1   64.72   22.93
   7  -6   1  104.93   22.64
  -7  -6  -1   60.07   22.65
  -7   6  -1   27.41   19.97
   7   6   2  184.36   28.32
   7  -6   2  225.02   35.18
  -7  -6  -2  129.09   24.64
  -7   6  -2  180.77   31.22
   7   6   3    1.83   21.02
  -7  -6  -3    1.75   18.48
  -7   6  -3   10.24   20.36
   7   6   4   83.01   29.74
   7  -6   4    7.78   26.52
  -7  -6  -4   73.07   20.65
  -7   6  -4   15.09   22.27
   7   6   5    3.96   19.75
   7  -6   5   35.70   22.81
  -7  -6  -5    0.65   20.16
  -7   6  -5   -7.76   21.82
   7   6   6   12.19   21.78
   7  -6   6   -9.40   23.57
  -7  -6  -6  -21.43   22.33
  -7   6  -6   67.34   24.42
   7   6   7    2.31   31.27
   7  -6   7    6.30   23.54
  -7  -6  -7   71.36   26.48
  -7   6  -7   16.24   28.91
   7   6   8   99.10   37.65
   7  -6   8   36.69   34.12
  -7  -6  -8   83.82   31.18
  -7   6  -8   33.01   36.06
   7   6   9   10.78   30.15
   7  -6   9   82.53   31.27
  -7   6  -9   -5.54   28.75
  -7  -6  -9   56.70   30.03
   7   6  10   30.65   35.24
   7  -6  10   30.92   29.43
  -7  -6 -10    1.58   24.59
  -7   6 -10    4.55   27.96
   7   7 -16  -24.43   25.81
  -7   7  16    3.41   25.07
  -7  -7  16   -6.65   24.28
   7   7 -15  156.10   40.56
   7  -7 -15  120.32   46.03
  -7  -7  15   88.26   34.17
  -7   7  15  180.31   40.69
   7   7 -14    6.81   29.51
   7  -7 -14   -1.86   35.41
  -7  -7  14   91.09   32.06
  -7   7  14   93.15   31.83
   7   7 -13  141.24   32.67
   7  -7 -13  146.53   38.06
  -7  -7  13   68.43   28.29
  -7   7  13   58.49   31.58
   7   7 -12    9.73   21.42
   7  -7 -12   24.24   23.20
  -7  -7  12   11.25   20.59
  -7   7  12   10.22   21.42
  -7   7  12    6.84   25.74
   7   7 -11  181.62   32.38
   7  -7 -11  207.33   36.68
  -7  -7  11  242.40   34.98
  -7   7  11  246.51   32.63
  -7   7  11  221.99   39.10
   7   7 -10   19.50   18.67
   7  -7 -10   21.50   26.79
  -7  -7  10   11.24   14.92
  -7   7  10   61.15   17.34
  -7   7  10   16.22   21.46
  -7  -7  10   23.69   24.13
   7   7  -9  381.07   32.79
   7  -7  -9  451.85   47.19
  -7  -7   9  399.43   40.09
  -7  -7   9  384.24   31.56
  -7   7   9  407.86   31.39
  -7   7   9  479.43   43.33
   7   7  -8  140.23   20.49
   7  -7  -8  153.65   34.22
  -7  -7   8  134.43   27.33
  -7  -7   8  120.65   21.66
  -7   7   8  115.89   16.95
  -7   7   8  104.55   24.44
   7   7  -7   48.95   12.75
   7  -7  -7   68.13   24.22
  -7  -7   7   64.30   27.58
  -7  -7   7   88.07   19.56
  -7   7   7   60.91   26.02
   7   7  -6   42.28   12.13
   7   7  -6   53.70   23.03
   7  -7  -6   57.10   23.40
  -7  -7   6   79.78   19.92
  -7   7   6   59.43   24.43
   7   7  -5   57.51   22.08
   7  -7  -5   60.19   23.94
  -7  -7   5   62.39   20.93
  -7   7   5   55.77   19.95
   7   7  -4   46.21   19.56
   7  -7  -4  -15.59   23.72
  -7  -7   4    2.39   17.06
  -7   7   4   25.45   19.20
   7   7  -3  122.11   33.30
   7  -7  -3  164.10   35.59
  -7  -7   3  215.36   24.62
  -7   7   3  173.04   27.37
   7   7  -2   45.02   20.86
   7  -7  -2   28.40   27.14
  -7  -7   2   54.52   21.11
  -7   7   2   24.76   18.17
   7   7  -1  301.98   39.32
   7  -7  -1  257.86   34.32
  -7  -7   1  275.27   34.27
  -7   7   1  262.12   31.45
   7   7   0   43.73   20.26
   7  -7   0   34.41   25.94
  -7  -7   0   37.53   21.86
  -7   7   0   30.19   25.48
   7   7   1   24.05   23.27
   7  -7   1   13.52   24.70
  -7  -7  -1    1.71   20.08
  -7   7  -1   17.69   18.02
   7   7   2   50.32   24.78
   7  -7   2   54.70   25.12
  -7  -7  -2   58.87   21.35
  -7   7  -2  113.73   28.45
   7  -7   3   20.28   24.36
  -7  -7  -3   -9.17   21.26
  -7   7  -3   21.19   18.74
   7   7   4   12.66   23.76
   7  -7   4   20.11   22.08
  -7  -7  -4   49.35   20.25
  -7   7  -4    2.00   27.11
   7   7   5   15.00   26.98
   7  -7   5  145.78   27.44
  -7  -7  -5   63.72   22.89
  -7   7  -5   -7.04   25.82
   7   7   6   78.40   36.83
   7  -7   6  100.19   28.75
  -7  -7  -6   90.86   31.22
  -7   7  -6   36.81   27.52
   7   7   7   51.67   33.74
   7  -7   7   20.65   30.08
  -7  -7  -7   21.48   27.59
  -7   7  -7   20.62   30.48
   7   7   8   25.20   31.43
   7  -7   8  105.99   36.56
  -7  -7  -8   60.34   32.66
  -7   7  -8   59.76   31.40
   7   7   9  -14.30   26.91
  -7  -7  -9   16.84   18.40
  -7   7  -9  -22.75   25.99
   7   8 -15   -8.27   30.90
  -7  -8  15   29.57   25.80
   7   8 -14   35.94   24.79
   7  -8 -14   30.34   35.90
  -7  -8  14   16.01   32.52
  -7   8  14   71.92   29.47
   7   8 -13   -7.28   24.98
   7  -8 -13    5.40   25.52
  -7  -8  13   33.14   22.87
   7   8 -12    0.27   24.51
   7  -8 -12   31.62   31.07
  -7  -8  12   48.73   25.06
  -7   8  12   80.00   25.08
  -7   8  12   23.31   30.18
   7   8 -11   -7.96   20.66
   7  -8 -11   22.22   28.90
  -7  -8  11    7.53   20.90
  -7   8  11   73.39   27.24
   7   8 -10   54.94   23.46
   7  -8 -10  110.49   29.68
  -7  -8  10   91.77   21.83
  -7  -8  10  115.30   29.09
  -7   8  10   87.97   23.44
  -7   8  10   73.32   32.62
   7   8  -9   29.96   16.07
   7  -8  -9   98.78   27.40
  -7  -8   9   12.02   22.74
  -7  -8   9   52.61   20.10
  -7   8   9   37.66   21.39
   7  -8  -8   81.40   37.16
  -7  -8   8  106.93   24.02
  -7   8   8  139.65   32.95
  -7  -8   8  120.92   34.31
   7   8  -7   54.23   25.24
   7  -8  -7   92.61   33.59
  -7  -8   7   89.16   22.90
  -7   8   7   48.16   23.00
   7   8  -6   51.07   26.65
   7  -8  -6   71.87   30.98
  -7  -8   6   14.94   21.13
  -7   8   6   36.79   25.40
   7   8  -5   10.93   23.73
   7  -8  -5   67.49   32.26
  -7  -8   5   47.31   22.09
  -7   8   5   39.58   20.06
   7   8  -4  124.33   26.61
   7  -8  -4  121.29   34.80
  -7  -8   4   71.30   21.33
  -7   8   4   79.76   22.95
   7   8  -3   46.17   24.80
   7  -8  -3  126.84   32.94
  -7  -8   3    4.55   23.25
  -7   8   3   70.37   26.81
   7   8  -2  134.32   29.62
   7  -8  -2  101.43   37.33
  -7  -8   2  112.65   25.23
  -7   8   2  174.70   32.64
   7   8  -1   56.21   23.29
   7  -8  -1   31.61   24.47
  -7  -8   1    7.24   19.26
  -7   8   1   27.04   20.35
   7   8   0   20.74   25.65
   7  -8   0   15.70   21.27
  -7  -8   0   14.94   18.46
  -7   8   0   30.88   23.29
   7   8   1  252.83   42.63
   7  -8   1  259.62   37.12
  -7  -8  -1  243.79   31.49
  -7   8  -1  168.02   31.97
   7   8   2  -14.60   20.44
   7  -8   2  -14.54   17.68
  -7  -8  -2   16.17   17.77
  -7   8  -2    3.33   15.83
   7   8   3  171.97   34.68
   7  -8   3  160.26   42.10
  -7  -8  -3  165.49   29.07
  -7   8  -3  226.85   40.08
   7   8   4    4.28   24.85
   7  -8   4   76.98   24.20
  -7  -8  -4   -9.32   23.78
  -7   8  -4    2.33   22.63
   7   8   5  145.12   36.25
   7  -8   5  204.08   37.63
  -7  -8  -5  185.30   36.64
  -7   8  -5  149.18   43.05
   7   8   6   34.53   26.69
   7  -8   6    9.60   25.31
  -7  -8  -6   25.40   21.02
  -7   8  -6   -7.16   30.81
   7   8   7  102.87   45.47
   7  -8   7   84.63   40.42
  -7  -8  -7  112.65   31.24
  -7   8  -7  112.05   34.37
   7   8   8  -10.04   35.76
   7  -8   8   64.65   33.47
  -7  -8  -8  -25.79   28.50
  -7   8  -8   33.28   31.89
  -7  -9  13   -1.04   19.88
   7  -9 -12   16.12   34.62
  -7  -9  12   93.84   34.17
  -7   9  12   31.65   33.15
   7  -9 -11  -19.15   25.87
  -7  -9  11   23.62   24.45
  -7   9  11  -13.77   24.69
   7  -9 -10   50.03   30.47
  -7  -9  10   60.98   28.02
  -7   9  10   48.57   24.87
   7  -9  -9   17.77   31.77
  -7  -9   9    7.64   27.87
  -7  -9   9   49.69   20.34
  -7   9   9    0.95   20.50
   7   9  -8   98.25   33.52
   7  -9  -8   49.44   38.11
  -7  -9   8   47.01   24.13
  -7   9   8   38.79   29.49
   7   9  -7    4.60   25.14
   7  -9  -7   17.97   27.89
  -7  -9   7    4.96   18.15
  -7   9   7   -1.20   21.44
   7   9  -6   91.07   39.78
   7  -9  -6  112.35   43.80
  -7  -9   6  131.88   31.27
  -7   9   6  176.54   29.85
   7   9  -5   -3.92   21.56
   7  -9  -5   57.36   23.64
  -7   9   5  -16.32   23.50
   7   9  -4  218.68   41.78
   7  -9  -4  159.01   39.04
  -7  -9   4  196.32   28.82
  -7   9   4  208.49   35.63
   7   9  -3  -21.31   21.02
   7  -9  -3    8.60   23.59
  -7  -9   3   29.90   22.71
  -7   9   3   30.70   23.75
   7   9  -2  210.37   37.03
   7  -9  -2  197.04   45.45
  -7  -9   2  162.93   30.21
  -7   9   2  216.38   36.89
   7   9  -1   43.18   19.66
   7  -9  -1    9.74   21.69
  -7  -9   1  -12.77   16.92
  -7   9   1  -13.06   16.82
   7   9   0  117.87   38.83
   7  -9   0  155.91   41.73
  -7  -9   0  144.81   28.08
  -7   9   0  148.27   36.03
   7   9   1   19.81   32.23
   7  -9   1   94.86   36.02
  -7  -9  -1   62.45   24.09
  -7   9  -1   31.93   29.00
   7   9   2  115.51   39.61
   7  -9   2  199.12   38.65
  -7  -9  -2   92.55   34.81
  -7   9  -2  155.94   38.29
   7   9   3  -10.47   27.70
   7  -9   3   21.54   23.66
  -7  -9  -3   -3.21   19.25
  -7   9  -3   14.30   19.83
   7   9   4   83.74   41.12
   7  -9   4  110.76   36.14
  -7  -9  -4  130.60   35.59
  -7   9  -4  131.98   39.01
   7   9   5   53.95   29.17
   7  -9   5   13.25   36.34
  -7  -9  -5   33.25   29.45
  -7   9  -5   -7.75   34.08
   7   9   6  131.35   49.56
   7  -9   6  127.23   46.88
  -7  -9  -6  165.09   35.18
  -7   9  -6  171.58   46.24
   7   9   7   77.13   37.66
   7  -9   7   94.61   31.83
  -7  -9  -7  -16.46   25.51
  -7   9  -7  -13.76   29.94
  -7 -10  12    4.74   35.00
  -7  10  12   34.12   32.46
   7 -10 -11   10.88   33.27
  -7 -10  11   -2.10   31.66
  -7  10  11   14.19   28.79
   7 -10 -10    3.40   30.05
[truncated: 119,923 more chars]
