# Supplementary material
Source: publisher figshare collection journal article supplement (https://acs.figshare.com/ndownloader/files/18064346)
Supplement: Supplementary file 1 [file 18064346 › NKU-FlexMOF-1a-C2H6.cif]

data_NKU-FlexMOF-1a-C2H6
_audit_creation_date               2018-11-22
_audit_creation_method
;
Olex2 1.2
(compiled 2018.05.29 svn.r3508 for OlexSys, GUI svn.r5506)
;
_shelx_SHELXL_version_number       '2018/1'
_audit_contact_author_address      ?
_audit_contact_author_email        ?
_audit_contact_author_name         ''
_audit_contact_author_phone        ?
_publ_contact_author_id_orcid      ?
_publ_section_references
;
Dolomanov, O.V., Bourhis, L.J., Gildea, R.J, Howard, J.A.K. & Puschmann, H.
 (2009), J. Appl. Cryst. 42, 339-341.

Sheldrick, G.M. (2015). Acta Cryst. A71, 3-8.

Sheldrick, G.M. (2015). Acta Cryst. C71, 3-8.
;
_chemical_name_common              ?
_chemical_name_systematic          ?
_chemical_formula_moiety           'C13 H6 Cu F N O4, 0.13(C2)'
_chemical_formula_sum              'C53 H24 Cu4 F4 N4 O16'
_chemical_formula_weight           1302.96
_chemical_melting_point            ?
loop_
  _atom_type_symbol
  _atom_type_description
  _atom_type_scat_dispersion_real
  _atom_type_scat_dispersion_imag
  _atom_type_scat_source
 'C' 'C' 0.0181 0.0091 'International Tables Vol C Tables 4.2.6.8 and 6.1.1.4'
 'H' 'H' 0.0000 0.0000 'International Tables Vol C Tables 4.2.6.8 and 6.1.1.4'
 'Cu' 'Cu' -1.9646 0.5888
 'International Tables Vol C Tables 4.2.6.8 and 6.1.1.4'
 'F' 'F' 0.0727 0.0534 'International Tables Vol C Tables 4.2.6.8 and 6.1.1.4'
 'N' 'N' 0.0311 0.0180 'International Tables Vol C Tables 4.2.6.8 and 6.1.1.4'
 'O' 'O' 0.0492 0.0322 'International Tables Vol C Tables 4.2.6.8 and 6.1.1.4'

_shelx_space_group_comment
;
The symmetry employed for this shelxl refinement is uniquely defined
by the following loop, which should always be used as a source of
symmetry information in preference to the above space-group names.
They are only intended as comments.
;
_space_group_crystal_system        'monoclinic'
_space_group_IT_number             14
_space_group_name_H-M_alt          'P 1 21/c 1'
_space_group_name_Hall             '-P 2ybc'
loop_
  _space_group_symop_operation_xyz
 'x, y, z'
 '-x, y+1/2, -z+1/2'
 '-x, -y, -z'
 'x, -y-1/2, z-1/2'

_cell_length_a                     10.4890(3)
_cell_length_b                     10.4486(4)
_cell_length_c                     15.1078(7)
_cell_angle_alpha                  90
_cell_angle_beta                   106.787(4)
_cell_angle_gamma                  90
_cell_volume                       1585.18(11)
_cell_formula_units_Z              1
_cell_measurement_reflns_used      4633
_cell_measurement_temperature      298(2)
_cell_measurement_theta_max        73.8190
_cell_measurement_theta_min        4.4230
_shelx_estimated_absorpt_T_max     ?
_shelx_estimated_absorpt_T_min     ?
_exptl_absorpt_coefficient_mu      2.158
_exptl_absorpt_correction_T_max    1.00000
_exptl_absorpt_correction_T_min    0.06715
_exptl_absorpt_correction_type     'none'
_exptl_absorpt_process_details     ?
_exptl_absorpt_special_details     ?
_exptl_crystal_colour              blue
_exptl_crystal_density_diffrn      1.365
_exptl_crystal_density_meas        ?
_exptl_crystal_density_method      ?
_exptl_crystal_description         rhombus
_exptl_crystal_F_000               650
_exptl_crystal_size_max            0.2
_exptl_crystal_size_mid            0.15
_exptl_crystal_size_min            0.1
_exptl_transmission_factor_max     ?
_exptl_transmission_factor_min     ?
_diffrn_reflns_av_R_equivalents    0.1138
_diffrn_reflns_av_unetI/netI       0.0948
_diffrn_reflns_Laue_measured_fraction_full  0.998
_diffrn_reflns_Laue_measured_fraction_max  0.968
_diffrn_reflns_limit_h_max         12
_diffrn_reflns_limit_h_min         -13
_diffrn_reflns_limit_k_max         9
_diffrn_reflns_limit_k_min         -12
_diffrn_reflns_limit_l_max         18
_diffrn_reflns_limit_l_min         -16
_diffrn_reflns_number              8416
_diffrn_reflns_point_group_measured_fraction_full  0.998
_diffrn_reflns_point_group_measured_fraction_max  0.968
_diffrn_reflns_theta_full          67.679
_diffrn_reflns_theta_max           74.178
_diffrn_reflns_theta_min           4.403
_diffrn_ambient_temperature        298(2)
_diffrn_detector_area_resol_mean   ?
_diffrn_measured_fraction_theta_full  0.998
_diffrn_measured_fraction_theta_max  0.968
_diffrn_measurement_device_type    'multiwire proportional'
_diffrn_measurement_method         'phi and omega scans'
_diffrn_radiation_monochromator    'graphite'
_diffrn_radiation_type             CuK\a
_diffrn_radiation_wavelength       1.54178
_diffrn_source                     ?
_reflns_Friedel_coverage           0.000
_reflns_Friedel_fraction_full      .
_reflns_Friedel_fraction_max       .
_reflns_number_gt                  2400
_reflns_number_total               3125
_reflns_special_details
;
 Reflections were merged by SHELXL according to the crystal
 class for the calculation of statistics and refinement.
 
 _reflns_Friedel_fraction is defined as the number of unique
 Friedel pairs measured divided by the number that would be
 possible theoretically, ignoring centric projections and
 systematic absences.
;
_reflns_threshold_expression       'I > 2\s(I)'
_computing_cell_refinement         ?
_computing_data_collection         ?
_computing_data_reduction          ?
_computing_molecular_graphics      'Olex2 (Dolomanov et al., 2009)'
_computing_publication_material    'Olex2 (Dolomanov et al., 2009)'
_computing_structure_refinement    'ShelXL (Sheldrick, 2015)'
_computing_structure_solution      'ShelXT (Sheldrick, 2015)'
_refine_diff_density_max           1.237
_refine_diff_density_min           -1.001
_refine_diff_density_rms           0.182
_refine_ls_extinction_coef         .
_refine_ls_extinction_method       none
_refine_ls_goodness_of_fit_ref     1.235
_refine_ls_hydrogen_treatment      constr
_refine_ls_matrix_type             full
_refine_ls_number_parameters       199
_refine_ls_number_reflns           3125
_refine_ls_number_restraints       306
_refine_ls_R_factor_all            0.1190
_refine_ls_R_factor_gt             0.1056
_refine_ls_restrained_S_all        1.190
_refine_ls_shift/su_max            0.000
_refine_ls_shift/su_mean           0.000
_refine_ls_structure_factor_coef   Fsqd
_refine_ls_weighting_details      
 'w=1/[\s^2^(Fo^2^)+(0.2000P)^2^] where P=(Fo^2^+2Fc^2^)/3'
_refine_ls_weighting_scheme        calc
_refine_ls_wR_factor_gt            0.3028
_refine_ls_wR_factor_ref           0.3176
_refine_special_details            ?
_olex2_refinement_description
;
1. Fixed Uiso
 At 1.2 times of:
  All C(H) groups
2. Uiso/Uaniso restraints and constraints
C008 \\sim C009 \\sim C00A \\sim C00B \\sim C00C \\sim C00D \\sim C00E \\sim
C00F \\sim C00G \\sim C00H \\sim C00I \\sim C00J \\sim C00K \\sim C1 \\sim C2:
within 3.8A with sigma of 0.01 and sigma for terminal atoms of 0.05
Uanis(C1) \\sim Ueq, Uanis(C2) \\sim Ueq: with sigma of 0.01 and sigma for
terminal atoms of 0.01
3. Others
 Fixed Sof: C1(0.125) C2(0.125)
4.a Aromatic/amide H refined with riding coordinates:
 C00A(H00A), C00E(H00E), C00F(H00F), C00G(H00G), C00I(H00I), C00J(H00J)
;
_atom_sites_solution_hydrogens     geom
_atom_sites_solution_primary       dual
_atom_sites_solution_secondary     ?
loop_
  _atom_site_label
  _atom_site_type_symbol
  _atom_site_fract_x
  _atom_site_fract_y
  _atom_site_fract_z
  _atom_site_U_iso_or_equiv
  _atom_site_adp_type
  _atom_site_occupancy
  _atom_site_site_symmetry_order
  _atom_site_calc_flag
  _atom_site_refinement_flags_posn
  _atom_site_refinement_flags_adp
  _atom_site_refinement_flags_occupancy
  _atom_site_disorder_assembly
  _atom_site_disorder_group
 Cu01 Cu 0.09163(7) -0.08987(8) 0.51119(6) 0.0369(4) Uani 1 1 d . . . . .
 O002 O 0.0239(4) 0.3593(5) 0.1122(3) 0.0486(11) Uani 1 1 d . . . . .
 O003 O 0.1833(4) 0.5074(5) 0.1300(3) 0.0530(12) Uani 1 1 d . . . . .
 O004 O 0.1928(4) 0.0233(5) 0.4534(3) 0.0539(12) Uani 1 1 d . . . . .
 O005 O 0.0305(4) 0.1705(5) 0.4269(4) 0.0525(11) Uani 1 1 d . . . . .
 N006 N 0.7785(5) 0.2554(5) 0.4655(4) 0.0459(12) Uani 1 1 d . . . . .
 F007 F 0.8029(5) 0.5936(5) 0.4470(6) 0.106(2) Uani 1 1 d . . . . .
 C008 C 0.1396(6) 0.1280(7) 0.4215(4) 0.0457(13) Uani 1 1 d . U . . .
 C009 C 0.1316(6) 0.4106(6) 0.1549(5) 0.0448(13) Uani 1 1 d . U . . .
 C00A C 0.3501(5) 0.2322(6) 0.4074(5) 0.0470(12) Uani 1 1 d . U . . .
 H00A H 0.398809 0.188491 0.459931 0.056 Uiso 1 1 calc R . . . .
 C00B C 0.2058(5) 0.3521(7) 0.2445(5) 0.0470(12) Uani 1 1 d . U . . .
 C00C C 0.2117(5) 0.2127(7) 0.3718(5) 0.0480(12) Uani 1 1 d . U . . .
 C00D C 0.5595(5) 0.3412(7) 0.4026(5) 0.0479(12) Uani 1 1 d . U . . .
 C00E C 0.1425(5) 0.2715(7) 0.2910(5) 0.0472(12) Uani 1 1 d . U . . .
 H00E H 0.051519 0.256997 0.267088 0.057 Uiso 1 1 calc R . . . .
 C00F C 0.6471(5) 0.2402(6) 0.4323(5) 0.0467(12) Uani 1 1 d . U . . .
 H00F H 0.612505 0.157790 0.429016 0.056 Uiso 1 1 calc R . . . .
 C00G C 0.3431(5) 0.3765(7) 0.2822(5) 0.0466(12) Uani 1 1 d . U . . .
 H00G H 0.386258 0.432228 0.252416 0.056 Uiso 1 1 calc R . . . .
 C00H C 0.4130(5) 0.3177(7) 0.3631(5) 0.0474(12) Uani 1 1 d . U . . .
 C00I C 0.6121(6) 0.4629(7) 0.4070(5) 0.0554(14) Uani 1 1 d . U . . .
 H00I H 0.557353 0.533415 0.386682 0.067 Uiso 1 1 calc R . . . .
 C00J C 0.8288(6) 0.3735(7) 0.4698(6) 0.0561(15) Uani 1 1 d . U . . .
 H00J H 0.920486 0.385158 0.491905 0.067 Uiso 1 1 calc R . . . .
 C00K C 0.7483(6) 0.4770(7) 0.4423(6) 0.0590(15) Uani 1 1 d . U . . .
 C1 C 0.724(10) 0.210(11) 0.696(7) 0.10(2) Uani 0.125 1 d . U P . .
 C2 C 0.615(10) 0.222(10) 0.653(7) 0.095(17) Uani 0.125 1 d . U P . .

loop_
  _atom_site_aniso_label
  _atom_site_aniso_U_11
  _atom_site_aniso_U_22
  _atom_site_aniso_U_33
  _atom_site_aniso_U_23
  _atom_site_aniso_U_13
  _atom_site_aniso_U_12
 Cu01 0.0273(5) 0.0386(6) 0.0433(6) 0.0001(3) 0.0081(4) 0.0005(3)
 O002 0.041(2) 0.056(3) 0.045(2) 0.011(2) 0.0061(17) -0.0053(18)
 O003 0.042(2) 0.057(3) 0.053(3) 0.017(2) 0.0029(19) -0.0037(19)
 O004 0.039(2) 0.061(3) 0.067(3) 0.017(2) 0.023(2) 0.0018(19)
 O005 0.039(2) 0.057(3) 0.065(3) 0.017(2) 0.0200(19) 0.0020(18)
 N006 0.029(2) 0.040(3) 0.066(3) -0.002(2) 0.009(2) 0.0026(18)
 F007 0.057(3) 0.050(3) 0.198(8) -0.002(3) 0.017(4) -0.0129(19)
 C008 0.034(2) 0.056(3) 0.044(3) 0.004(2) 0.006(2) -0.002(2)
 C009 0.033(2) 0.056(3) 0.045(3) 0.002(2) 0.011(2) 0.005(2)
 C00A 0.032(2) 0.053(2) 0.053(3) 0.009(2) 0.0089(19) -0.0002(19)
 C00B 0.034(2) 0.053(3) 0.050(3) 0.007(2) 0.007(2) 0.001(2)
 C00C 0.033(2) 0.055(3) 0.055(3) 0.004(2) 0.010(2) -0.002(2)
 C00D 0.031(2) 0.050(3) 0.060(3) 0.005(2) 0.010(2) -0.0002(19)
 C00E 0.031(2) 0.056(3) 0.053(3) 0.007(2) 0.008(2) 0.000(2)
 C00F 0.032(2) 0.046(3) 0.061(3) 0.005(2) 0.010(2) -0.0018(19)
 C00G 0.032(2) 0.053(3) 0.055(3) 0.008(2) 0.012(2) 0.0001(19)
 C00H 0.0304(19) 0.052(2) 0.058(3) 0.007(2) 0.0102(19) -0.0005(18)
 C00I 0.038(2) 0.050(3) 0.075(3) 0.006(3) 0.011(2) 0.004(2)
 C00J 0.032(2) 0.052(3) 0.078(4) -0.003(3) 0.006(2) -0.004(2)
 C00K 0.039(2) 0.048(3) 0.083(4) 0.002(3) 0.007(3) -0.002(2)
 C1 0.10(2) 0.11(2) 0.10(2) 0.000(10) 0.031(11) -0.002(10)
 C2 0.094(19) 0.096(19) 0.094(19) -0.002(10) 0.026(10) -0.001(10)

_geom_special_details
;
 All esds (except the esd in the dihedral angle between two l.s. planes)
 are estimated using the full covariance matrix.  The cell esds are taken
 into account individually in the estimation of esds in distances, angles
 and torsion angles; correlations between esds in cell parameters are only
 used when they are defined by crystal symmetry.  An approximate (isotropic)
 treatment of cell esds is used for estimating esds involving l.s. planes.
;
loop_
  _geom_bond_atom_site_label_1
  _geom_bond_atom_site_label_2
  _geom_bond_distance
  _geom_bond_site_symmetry_2
  _geom_bond_publ_flag
 Cu01 Cu01 2.6383(15) 3_556 ?
 Cu01 O002 1.980(4) 2_545 ?
 Cu01 O003 1.972(4) 4_566 ?
 Cu01 O004 1.956(4) . ?
 Cu01 O005 1.979(4) 3_556 ?
 Cu01 N006 2.167(5) 3_656 ?
 O002 C009 1.248(7) . ?
 O003 C009 1.256(8) . ?
 O004 C008 1.259(8) . ?
 O005 C008 1.252(8) . ?
 N006 C00F 1.333(7) . ?
 N006 C00J 1.336(9) . ?
 F007 C00K 1.339(9) . ?
 C008 C00C 1.499(9) . ?
 C009 C00B 1.484(9) . ?
 C00A H00A 0.9300 . ?
 C00A C00C 1.410(7) . ?
 C00A C00H 1.391(9) . ?
 C00B C00E 1.383(9) . ?
 C00B C00G 1.410(7) . ?
 C00C C00E 1.372(9) . ?
 C00D C00F 1.386(9) . ?
 C00D C00H 1.500(7) . ?
 C00D C00I 1.380(10) . ?
 C00E H00E 0.9300 . ?
 C00F H00F 0.9300 . ?
 C00G H00G 0.9300 . ?
 C00G C00H 1.375(9) . ?
 C00I H00I 0.9300 . ?
 C00I C00K 1.381(8) . ?
 C00J H00J 0.9300 . ?
 C00J C00K 1.361(10) . ?
 C1 C2 1.15(12) . ?

loop_
  _geom_angle_atom_site_label_1
  _geom_angle_atom_site_label_2
  _geom_angle_atom_site_label_3
  _geom_angle
  _geom_angle_site_symmetry_1
  _geom_angle_site_symmetry_3
  _geom_angle_publ_flag
 O002 Cu01 Cu01 81.09(14) 2_545 3_556 ?
 O002 Cu01 N006 97.1(2) 2_545 3_656 ?
 O003 Cu01 Cu01 87.22(14) 4_566 3_556 ?
 O003 Cu01 O002 168.15(19) 4_566 2_545 ?
 O003 Cu01 O005 88.2(2) 4_566 3_556 ?
 O003 Cu01 N006 94.7(2) 4_566 3_656 ?
 O004 Cu01 Cu01 88.93(14) . 3_556 ?
 O004 Cu01 O002 90.3(2) . 2_545 ?
 O004 Cu01 O003 87.6(2) . 4_566 ?
 O004 Cu01 O005 167.8(2) . 3_556 ?
 O004 Cu01 N006 99.1(2) . 3_656 ?
 O005 Cu01 Cu01 79.43(14) 3_556 3_556 ?
 O005 Cu01 O002 91.5(2) 3_556 2_545 ?
 O005 Cu01 N006 92.6(2) 3_556 3_656 ?
 N006 Cu01 Cu01 171.76(15) 3_656 3_556 ?
 C009 O002 Cu01 126.0(4) . 2 ?
 C009 O003 Cu01 119.0(4) . 4_565 ?
 C008 O004 Cu01 117.3(4) . . ?
 C008 O005 Cu01 127.5(4) . 3_556 ?
 C00F N006 Cu01 119.9(4) . 3_656 ?
 C00F N006 C00J 118.7(5) . . ?
 C00J N006 Cu01 120.5(4) . 3_656 ?
 O004 C008 C00C 118.2(5) . . ?
 O005 C008 O004 126.6(6) . . ?
 O005 C008 C00C 115.2(6) . . ?
 O002 C009 O003 126.6(6) . . ?
 O002 C009 C00B 116.9(6) . . ?
 O003 C009 C00B 116.5(5) . . ?
 C00C C00A H00A 120.4 . . ?
 C00H C00A H00A 120.4 . . ?
 C00H C00A C00C 119.2(6) . . ?
 C00E C00B C009 120.7(5) . . ?
 C00E C00B C00G 119.3(6) . . ?
 C00G C00B C009 120.0(6) . . ?
 C00A C00C C008 120.4(6) . . ?
 C00E C00C C008 119.8(5) . . ?
 C00E C00C C00A 119.8(6) . . ?
 C00F C00D C00H 120.8(6) . . ?
 C00I C00D C00F 117.9(5) . . ?
 C00I C00D C00H 121.3(6) . . ?
 C00B C00E H00E 119.5 . . ?
 C00C C00E C00B 121.1(5) . . ?
 C00C C00E H00E 119.5 . . ?
 N006 C00F C00D 123.2(6) . . ?
 N006 C00F H00F 118.4 . . ?
 C00D C00F H00F 118.4 . . ?
 C00B C00G H00G 120.0 . . ?
 C00H C00G C00B 119.9(6) . . ?
 C00H C00G H00G 120.0 . . ?
 C00A C00H C00D 119.2(6) . . ?
 C00G C00H C00A 120.6(5) . . ?
 C00G C00H C00D 120.2(6) . . ?
 C00D C00I H00I 121.0 . . ?
 C00K C00I C00D 118.1(6) . . ?
 C00K C00I H00I 121.0 . . ?
 N006 C00J H00J 119.4 . . ?
 N006 C00J C00K 121.1(5) . . ?
 C00K C00J H00J 119.4 . . ?
 F007 C00K C00I 119.8(7) . . ?
 F007 C00K C00J 119.2(6) . . ?
 C00J C00K C00I 121.0(6) . . ?

_shelx_res_file
;
TITL 1_a.res in P2(1)/c
    1.res
    created by SHELXL-2018/1 at 13:33:32 on 22-Nov-2018
CELL 1.54178 10.489 10.4486 15.1078 90 106.787 90
ZERR 4 0.0003 0.0004 0.0007 0 0.004 0
LATT 1
SYMM -X,0.5+Y,0.5-Z
SFAC C H Cu F N O
UNIT 53 27 4 4 4 16
SIMU 0.01 0.05 3.8 $c
ISOR 0.01 0.01 C1 C2

L.S. 80
PLAN  80
BOND $H
LIST 4
fmap 2
acta
REM <olex2.extras>
REM <HklSrc "%.\\1.hkl">
REM </olex2.extras>

WGHT    0.200000
FVAR       0.45952
CU01  3    0.091632   -0.089869    0.511194    11.00000    0.02729    0.03861 =
         0.04334    0.00012    0.00805    0.00053
O002  6    0.023910    0.359306    0.112214    11.00000    0.04061    0.05573 =
         0.04544    0.01116    0.00611   -0.00526
O003  6    0.183327    0.507415    0.129973    11.00000    0.04219    0.05667 =
         0.05337    0.01696    0.00289   -0.00373
O004  6    0.192793    0.023349    0.453367    11.00000    0.03885    0.06071 =
         0.06714    0.01737    0.02340    0.00184
O005  6    0.030529    0.170527    0.426930    11.00000    0.03900    0.05716 =
         0.06460    0.01716    0.01997    0.00203
N006  5    0.778504    0.255428    0.465494    11.00000    0.02930    0.03997 =
         0.06556   -0.00182    0.00912    0.00257
F007  4    0.802949    0.593559    0.446970    11.00000    0.05660    0.05000 =
         0.19848   -0.00170    0.01724   -0.01290
C008  1    0.139634    0.128047    0.421547    11.00000    0.03379    0.05595 =
         0.04429    0.00408    0.00648   -0.00203
C009  1    0.131569    0.410640    0.154902    11.00000    0.03319    0.05563 =
         0.04545    0.00206    0.01134    0.00491
C00A  1    0.350109    0.232216    0.407422    11.00000    0.03231    0.05303 =
         0.05342    0.00860    0.00892   -0.00023
AFIX  43
H00A  2    0.398809    0.188491    0.459931    11.00000   -1.20000
AFIX   0
C00B  1    0.205843    0.352122    0.244489    11.00000    0.03417    0.05310 =
         0.05037    0.00737    0.00706    0.00070
C00C  1    0.211697    0.212679    0.371777    11.00000    0.03264    0.05467 =
         0.05481    0.00400    0.00987   -0.00159
C00D  1    0.559541    0.341154    0.402591    11.00000    0.03095    0.05024 =
         0.06031    0.00505    0.00990   -0.00020
C00E  1    0.142491    0.271532    0.290977    11.00000    0.03070    0.05587 =
         0.05288    0.00704    0.00844   -0.00017
AFIX  43
H00E  2    0.051519    0.256997    0.267088    11.00000   -1.20000
AFIX   0
C00F  1    0.647092    0.240192    0.432339    11.00000    0.03153    0.04563 =
         0.06069    0.00473    0.00958   -0.00182
AFIX  43
H00F  2    0.612505    0.157790    0.429016    11.00000   -1.20000
AFIX   0
C00G  1    0.343066    0.376478    0.282206    11.00000    0.03172    0.05306 =
         0.05488    0.00779    0.01245    0.00012
AFIX  43
H00G  2    0.386258    0.432228    0.252416    11.00000   -1.20000
AFIX   0
C00H  1    0.412967    0.317698    0.363099    11.00000    0.03041    0.05245 =
         0.05775    0.00718    0.01021   -0.00045
C00I  1    0.612097    0.462894    0.406962    11.00000    0.03844    0.04966 =
         0.07472    0.00628    0.01088    0.00352
AFIX  43
H00I  2    0.557353    0.533415    0.386682    11.00000   -1.20000
AFIX   0
C00J  1    0.828848    0.373491    0.469779    11.00000    0.03204    0.05187 =
         0.07798   -0.00321    0.00585   -0.00439
AFIX  43
H00J  2    0.920486    0.385158    0.491905    11.00000   -1.20000
AFIX   0
C00K  1    0.748316    0.476976    0.442315    11.00000    0.03900    0.04842 =
         0.08285    0.00192    0.00701   -0.00187

C1    1    0.724261    0.210333    0.695655    10.12500    0.10436    0.10655 =
         0.10189   -0.00037    0.03147   -0.00159
C2    1    0.615121    0.221865    0.652598    10.12500    0.09415    0.09587 =
         0.09383   -0.00171    0.02593   -0.00116
HKLF 4


REM  1_a.res in P2(1)/c
REM R1 =  0.1056 for    2400 Fo > 4sig(Fo)  and  0.1190 for all    3125 data
REM    199 parameters refined using    306 restraints

END

WGHT      0.2000      0.0000

REM Highest difference peak  1.237,  deepest hole -1.001,  1-sigma level  0.182
Q1    1   0.0037  0.3893  0.0435  11.00000  0.05    1.24
Q2    1   0.1828 -0.0827  0.5626  11.00000  0.05    1.21
Q3    1   0.1287 -0.0394  0.4621  11.00000  0.05    1.05
Q4    1   0.1454 -0.1295  0.4557  11.00000  0.05    0.91
Q5    1  -0.0652  0.3773  0.0876  11.00000  0.05    0.77
Q6    1   0.8033  0.1167  0.7346  11.00000  0.05    0.76
Q7    1  -0.0078  0.0615  0.4413  11.00000  0.05    0.75
Q8    1  -0.0119  0.1286  0.4366  11.00000  0.05    0.75
Q9    1  -0.0518  0.1301  0.4330  11.00000  0.05    0.74
Q10   1   0.6970  0.2468  0.6874  11.00000  0.05    0.74
Q11   1   0.0551 -0.0430  0.5573  11.00000  0.05    0.71
Q12   1   0.8789  0.4169  0.5621  11.00000  0.05    0.67
Q13   1   0.1863  0.4499  0.0774  11.00000  0.05    0.67
Q14   1   0.1879  0.0648  0.4787  11.00000  0.05    0.65
Q15   1  -0.0660  0.4577  0.1003  11.00000  0.05    0.65
Q16   1   0.6873  0.1366  0.6849  11.00000  0.05    0.63
Q17   1   0.1016  0.0885  0.4242  11.00000  0.05    0.61
Q18   1   0.6345  0.1043  0.6643  11.00000  0.05    0.60
Q19   1   0.7138  0.1561  0.7084  11.00000  0.05    0.59
Q20   1   0.1045  0.6022  0.0997  11.00000  0.05    0.58
Q21   1   0.6235  0.1813  0.6758  11.00000  0.05    0.57
Q22   1   0.1148  0.5455  0.1208  11.00000  0.05    0.55
Q23   1   0.1337  0.6414  0.1315  11.00000  0.05    0.54
Q24   1   0.1202  0.5319  0.1884  11.00000  0.05    0.51
Q25   1   0.8932  0.6245  0.5048  11.00000  0.05    0.50
Q26   1   0.7819  0.2470  0.6947  11.00000  0.05    0.50
Q27   1  -0.0848  0.4179  0.1804  11.00000  0.05    0.50
Q28   1   0.9451  0.4172  0.4138  11.00000  0.05    0.49
Q29   1   0.0058  0.2428  0.4690  11.00000  0.05    0.48
Q30   1  -0.0986  0.0966  0.2484  11.00000  0.05    0.48
Q31   1  -0.0130  0.2589  0.0579  11.00000  0.05    0.48
Q32   1   0.8951  0.4120  0.3543  11.00000  0.05    0.48
Q33   1   0.6338  0.2731  0.6363  11.00000  0.05    0.45
Q34   1   0.0404  0.1244  0.3427  11.00000  0.05    0.45
Q35   1   0.8345  0.2572  0.4125  11.00000  0.05    0.44
Q36   1   0.8204  0.5662  0.3922  11.00000  0.05    0.43
Q37   1   0.2172  0.1398  0.4686  11.00000  0.05    0.43
Q38   1   1.0493  0.3686  0.5138  11.00000  0.05    0.43
Q39   1   0.5728  0.0948  0.6865  11.00000  0.05    0.42
Q40   1   0.1148  0.2846  0.1650  11.00000  0.05    0.41
Q41   1   0.2315  0.0352  0.4571  11.00000  0.05    0.40
Q42   1   0.6209  0.4579  0.3586  11.00000  0.05    0.40
Q43   1   0.2840  0.0276  0.4819  11.00000  0.05    0.39
Q44   1   0.3948  0.2507  0.5125  11.00000  0.05    0.39
Q45   1   0.2801  0.1879  0.3988  11.00000  0.05    0.39
Q46   1   0.3405  0.2601  0.4280  11.00000  0.05    0.39
Q47   1   0.7551  0.4551  0.3944  11.00000  0.05    0.38
Q48   1   0.7834  0.5801  0.4904  11.00000  0.05    0.37
Q49   1   0.1251  0.3769  0.1754  11.00000  0.05    0.36
Q50   1   0.2194  0.1779  0.3641  11.00000  0.05    0.36
Q51   1   0.8414  0.3989  0.6636  11.00000  0.05    0.36
Q52   1   0.3394  0.2425  0.5631  11.00000  0.05    0.36
Q53   1   0.2033  0.3411  0.1324  11.00000  0.05    0.35
Q54   1   0.7360  0.2519  0.4602  11.00000  0.05    0.35
Q55   1   0.1742  0.4106  0.2976  11.00000  0.05    0.34
Q56   1   0.1395  0.2251  0.3381  11.00000  0.05    0.33
Q57   1   0.3414  0.1181  0.5860  11.00000  0.05    0.33
Q58   1   0.8331  0.3245  0.6004  11.00000  0.05    0.33
Q59   1   0.3346  0.1658  0.4996  11.00000  0.05    0.33
Q60   1   0.6555  0.7272  0.3479  11.00000  0.05    0.33
Q61   1   0.8802  0.6473  0.4437  11.00000  0.05    0.32
Q62   1   0.1255  0.4037  0.3077  11.00000  0.05    0.32
Q63   1   0.0977  0.2110  0.4683  11.00000  0.05    0.31
Q64   1   0.8148  0.6309  0.5358  11.00000  0.05    0.31
Q65   1   0.1906  0.5375  0.2201  11.00000  0.05    0.31
Q66   1   0.2228  0.4334  0.3642  11.00000  0.05    0.30
Q67   1   0.2103  0.3034  0.3422  11.00000  0.05    0.30
Q68   1   0.0606  0.2065  0.3605  11.00000  0.05    0.29
Q69   1   0.1919  0.4870  0.3601  11.00000  0.05    0.29
Q70   1   0.8762  0.2263  0.4951  11.00000  0.05    0.28
Q71   1   0.1607  0.2815  0.2509  11.00000  0.05    0.28
Q72   1   0.8164  0.3348  0.5190  11.00000  0.05    0.28
Q73   1   0.7588  0.3238  0.5534  11.00000  0.05    0.28
Q74   1   0.7920  0.2417  0.5051  11.00000  0.05    0.28
Q75   1   0.6791  0.0888  0.4541  11.00000  0.05    0.27
Q76   1   0.8015  0.5427  0.3105  11.00000  0.05    0.27
Q77   1   0.5609  0.1799  0.5435  11.00000  0.05    0.27
Q78   1   0.0856  0.2535  0.5145  11.00000  0.05    0.26
Q79   1   0.1585 -0.0347  0.3404  11.00000  0.05    0.26
Q80   1   0.5493  0.3368  0.6864  11.00000  0.05    0.25
;
_shelx_res_checksum                16478
_shelx_hkl_file
;
   0   0   2 9999.00  920.00
   0   0  -2 9860.60  919.98
   0   0  -3   -0.20    1.80
   0   0   3   -0.25    2.35
   0   0   4  145.82   15.58
   0   0  -4  143.30   15.23
   0   0  -5   -0.38    2.28
   0   0   5   -1.58    3.20
   0   0   5    1.43    2.93
   0   0  -6   41.71    5.05
   0   0   6   53.03    6.05
   0   0   6   41.73    5.60
   0   0   7    1.03    1.68
   0   0   7   -0.93    3.18
   0   0   7   -0.38    1.70
   0   0   8  196.96   22.80
   0   0   8  252.69   22.80
   0   0   8  197.53   23.55
   0   0   9   -0.33    2.43
   0   0   9   -0.80    2.08
   0   0  10   47.88    5.93
   0   0  10   56.51    5.95
   0   0  11   -1.08    3.18
   0   0  11    0.18    2.93
   0   0  12   10.10    3.98
   0   0  12   19.80    3.30
   0   0  13   -0.83    3.35
   0   0  13   -0.90    2.35
   0   0  14   53.26    6.25
   0   0  15    2.83    2.95
   0   0  16    6.03    2.88
   0   0  17   -0.58    2.55
   0  -1   1 2638.64  234.79
   0   1  -1 2447.11  234.74
   0   1  -2 2255.78  209.16
   0   1   3  173.23   21.05
   0  -1   3  270.20   21.13
   0   1  -3  206.88   20.68
   0   1  -3  254.84   20.93
   0   1  -4 1860.66  153.13
   0   1   4 1206.30  153.13
   0   1  -4 1564.74  152.98
   0  -1   4 2297.71  153.45
   0   1   5   97.72   18.03
   0   1   5  114.44   17.85
   0   1  -5  214.66   17.73
   0  -1   5  312.45   18.58
   0   1  -5  238.97   18.00
   0   1  -5  194.61   17.90
   0   1  -6  483.18   33.61
   0   1  -6  429.25   33.66
   0   1   6  181.43   33.71
   0  -1   6  588.55   34.53
   0   1   6  224.01   33.61
   0  -1   7  675.14   66.96
   0  -1   7  638.01   66.14
   0  -1   7  826.49   66.16
   0   1   7  802.08   66.19
   0   1   7  382.46   66.69
   0   1  -7  897.98   66.54
   0   1   7  357.33   66.41
   0  -1   7  902.38   66.16
   0   1   7  611.20   66.14
   0   1  -7  756.35   66.54
   0   1   8    0.98    4.50
   0  -1   8    0.58    2.10
   0  -1   8    1.43    2.25
   0  -1   8   -0.08    1.88
   0   1  -8   -0.53    2.43
   0   1   8    1.05    1.98
   0   1  -8   -0.05    2.95
   0   1   8   -1.30    2.18
   0   1   8    0.65    2.78
   0  -1   9   77.19    8.98
   0   1   9   82.71    9.08
   0   1   9   53.81    9.05
   0   1  10   25.15    3.80
   0   1  10   22.23    3.83
   0  -1  10   26.30    3.83
   0   1  11   26.50    4.28
   0  -1  11   20.78    3.93
   0   1  11   20.28    4.20
   0  -1  12    7.93    3.68
   0   1  12   10.90    3.48
   0   1  12    4.38    3.58
   0   1  13   33.13    4.03
   0   1  13   25.38    4.65
   0  -1  13   23.48    4.25
   0   1  14   21.35    4.10
   0  -1  14   15.55    3.53
   0   1  14   17.28    3.03
   0   1  15   37.06    4.85
   0  -1  15   20.68    3.85
   0  -1  16   51.08    7.10
   0   1  16   98.77    7.70
   0   1  17   19.88    3.65
   0   2  -1 1418.69  117.67
   0  -2   1  938.48  118.02
   0  -2   2  777.58   64.89
   0   2  -2  777.51   64.71
   0  -2   3  960.81   88.26
   0   2  -3  900.63   88.24
   0  -2  -3 1106.76   88.79
   0   2   3  922.25   88.54
   0  -2   4  217.59   17.28
   0   2   4  194.18   17.40
   0   2  -4  199.83   17.10
   0  -2  -4  177.88   17.20
   0   2  -4  150.03   16.65
   0   2   5  359.96   42.63
   0  -2  -5  488.88   42.81
   0   2  -5  519.06   42.71
   0   2  -5  458.88   42.41
   0  -2   6  335.56   27.68
   0  -2  -6  274.92   28.15
   0   2  -6  323.58   28.30
   0   2   6  179.66   28.45
   0   2  -6  303.00   27.83
   0   2   6  328.48   27.65
   0   2  -6  356.06   28.30
   0   2   6  172.55   27.88
   0   2   7  579.17   52.68
   0  -2   7  664.99   52.68
   0   2  -7  539.17   53.11
   0   2   7  292.12   53.38
   0   2  -7  569.72   52.86
   0  -2   7  643.36   52.71
   0   2   7  263.47   52.78
   0   2  -7  604.88   53.33
   0   2   7  701.14   52.76
   0   2   8   47.76    9.38
   0  -2   8  106.99    7.83
   0  -2   8   57.63    7.40
   0  -2   8  111.57    7.70
   0   2   8   64.14    7.65
   0   2  -8   62.94    8.20
   0   2   9   -2.70    2.98
   0  -2   9   -0.18    3.48
   0  -2   9    0.78    2.15
   0  -2   9    3.83    3.05
   0   2  10   -0.08    2.93
   0  -2  10    1.78    3.68
   0  -2  10    4.15    2.73
   0  -2  10    0.25    4.33
   0  -2  11   11.30    3.40
   0   2  11    6.80    3.50
   0   2  11    0.95    3.50
   0   2  12    1.23    3.70
   0   2  12    5.15    3.73
   0  -2  12    5.15    3.28
   0   2  13   14.50    4.33
   0  -2  13   21.03    4.05
   0   2  13   26.38    4.05
   0  -2  14    3.28    2.90
   0   2  14    0.33    2.88
   0   2  14    1.03    3.48
   0   2  15   58.21    7.33
   0   2  15   64.11    6.73
   0   2  16    4.80    3.45
   0   2  16    4.58    2.15
   0   2  17   82.89    8.68
   0   3   0   -0.03    2.65
   0  -3   1  195.26   15.75
   0   3  -1  119.22   12.60
   0  -3   2  287.12   41.01
   0   3   2  421.65   41.18
   0   3   3   35.53    5.63
   0   3  -3   39.06    4.58
   0  -3   3   23.93    4.45
   0   3   4   16.78    4.10
   0  -3   4   17.68    3.63
   0  -3   5  204.56   18.63
   0   3  -5  207.61   19.23
   0   3  -5  179.46   18.75
   0   3   5  204.36   19.30
   0   3  -6  176.83   16.45
   0   3   6  183.06   16.10
   0   3  -6  201.36   17.00
   0  -3  -6  169.03   17.20
   0  -3   6  183.98   16.15
   0  -3   6  218.41   16.33
   0  -3   7   93.62    7.55
   0   3  -7   78.86    8.75
   0   3  -7   69.06    7.48
   0  -3   7   71.19    7.18
   0   3   7   64.34    7.40
   0   3  -7   71.61    8.33
   0  -3  -7   55.76    8.45
   0   3   7   69.76    7.18
   0  -3   8  107.57    9.73
   0  -3   8   83.21    9.35
   0   3   8   91.69    9.43
   0   3   8  103.72    9.53
   0   3   9    2.58    3.05
   0  -3   9    0.45    2.98
   0  -3   9    0.08    3.83
   0   3   9    0.83    3.45
   0  -3  10   36.21    7.90
   0  -3  10  115.74    8.75
   0   3  10  115.32    7.98
   0   3  10   44.08    7.78
   0   3  11   29.18    6.45
   0   3  11   52.13    6.45
   0   3  12   59.58    7.20
   0   3  13   12.08    3.68
   0   3  14   84.69    9.03
   0   3  15   -3.03    2.95
   0   3  16   61.94    4.83
   0   3  16   16.08    4.83
   0   3  17    2.68    2.60
   0   4   0  775.83   75.14
   0  -4   0 1037.42   78.36
   0   4   1   16.03    2.95
   0   4  -1   18.95    3.28
   0   4  -2  163.25   17.60
   0   4   2  178.95   18.70
   0  -4   3   -0.08    3.00
   0   4   3    0.28    4.68
   0   4  -3    1.55    3.00
   0   4  -4  546.04   30.88
   0  -4   4  505.38   29.83
   0   4   4  547.42   31.53
   0   4   5  100.82    9.88
   0   4   5  155.88    8.90
   0   4   6  129.17    8.08
   0  -4   6   65.76    8.10
   0  -4   6   36.08    7.80
   0   4   6  113.02    7.90
   0   4   7   72.84    5.80
   0   4   7   85.56    6.00
   0   4   8  232.46   15.80
   0  -4   8  192.41   16.15
   0  -4   9  156.58   13.58
   0   4   9  184.36   13.15
   0  -4  10   82.09   10.58
   0  -4  10   57.53    9.88
   0   4  10  120.85    9.93
   0   4  10  122.12   10.08
   0  -4  11   94.07   13.48
   0   4  11   99.57   12.88
   0   4  12   36.48    8.60
   0   4  12  136.20    8.88
   0   4  13   45.23    4.98
   0   4  13   15.45    4.45
   0   4  14    3.33    3.23
   0   4  14    0.15    3.33
   0   4  15    9.00    2.95
   0   4  15    6.78    3.48
   0   4  16   -0.83    2.78
   0   4  16   -0.43    2.23
   0  -5   0    4.80    9.25
   0   5   0    1.48    2.88
   0   5  -1  171.18   16.08
   0  -5  -1  169.85   21.18
   0  -5   1  162.38   15.30
   0   5   1  151.28   15.73
   0   5   1  141.02   17.58
   0   5   2  130.62   14.43
   0  -5   2  126.77   12.63
   0   5  -2  138.92   13.53
   0   5   2  128.15   13.00
   0   5   3  292.65   25.05
   0   5   3  305.55   26.50
   0  -5   3  278.45   24.80
   0   5   3  226.79   24.65
   0   5  -3  275.52   25.65
   0  -5   3  304.35   25.08
   0  -5   3  361.54   26.70
   0   5   4   80.86    9.08
   0   5   4   70.44    6.93
   0   5   4   87.71    7.23
   0  -5   4   80.01    7.08
   0  -5   4   52.08    7.23
   0   5  -4   79.14    8.33
   0  -5   4   78.74    7.15
   0  -5   5  431.97   42.86
   0   5   5  477.38   42.68
   0   5   5  534.96   42.76
   0   5   6   30.33    3.18
   0   5   6   33.63    3.50
   0  -5   6   22.25    3.40
   0   5   7  376.51   29.18
   0  -5   7  163.73   29.35
   0  -5   7  240.34   29.20
   0   5   7  483.13   29.43
   0   5   8   13.05    2.78
   0  -5   8    7.95    3.08
   0  -5   8    7.90    4.50
   0   5   8   18.48    3.53
   0   5   9  130.80   11.43
   0  -5   9  100.32   11.65
   0   5  10   52.58    5.40
   0  -5  10   50.06    6.05
   0  -5  11   77.24   13.58
   0   5  11  154.98   12.80
   0   5  12   19.23    3.80
   0  -5  12   10.43    6.28
   0   5  12   17.63    4.30
   0   5  13   62.66    5.90
   0   5  13   34.16    6.13
   0   5  14    2.33    3.25
   0   5  14    1.05    3.33
   0   5  15    6.18    2.83
   0   5  15   -1.00    2.65
   0   5  16    2.15    2.15
   0   5  16   -2.78    2.45
   0   6   0  581.60   72.99
   0  -6   0  545.22   75.34
   0   6  -1   53.33    7.75
   0  -6   1   60.59    6.88
   0   6   1   57.43    9.83
   0   6   1   58.06    7.58
   0  -6   1   36.93    9.25
   0  -6  -1   62.01   13.70
   0  -6   2  661.94   72.99
   0   6  -2  603.18   71.66
   0  -6  -2  535.89   74.19
   0   6   2  648.41   72.24
   0  -6   2  717.57   71.09
   0   6   2  628.16   71.39
   0   6   3   -0.43    1.58
   0  -6   3   -0.35    2.20
   0   6   3    1.23    5.13
   0   6  -3   -1.53    3.63
   0  -6   3    2.05    2.35
   0  -6   3    1.40    3.40
   0  -6   3   -2.43    3.05
   0  -6   4 1038.80  103.27
   0  -6   4 1540.36  103.69
   0   6   4  936.91  103.17
   0  -6   4 1393.33  103.44
   0  -6   5    9.80    3.83
   0   6   5    6.75    2.28
   0  -6   5    7.58    2.65
   0  -6   6  697.22   52.18
   0   6   6  579.90   51.98
   0  -6   6  677.59   52.41
   0   6   7   23.20    3.55
   0  -6   7   18.83    4.80
   0   6   7   19.43    2.93
   0  -6   7   23.83    3.38
   0  -6   8   60.24    7.50
   0   6   8   67.59    6.40
   0   6   8   50.88    5.98
   0  -6   9   15.23    5.25
   0   6   9   14.53    2.80
   0   6   9   20.30    4.00
   0   6  10  106.22    9.55
   0  -6  10   95.69   10.25
   0   6  10   78.91    8.88
   0   6  11    0.03    2.60
   0  -6  11    2.63    4.70
   0   6  11    1.58    3.63
   0   6  12   45.21    5.65
   0  -6  12   74.44    7.83
   0   6  13    1.53    2.70
   0   6  14   24.18    3.50
   0   6  14   23.95    3.98
   0   6  15    9.73    2.35
   0   6  15   11.00    2.68
   0   6  16    0.58    1.65
   0  -7   0   -2.75    3.63
   0  -7   0    0.03    2.75
   0  -7  -1   82.09   11.13
   0  -7   1  101.59   10.48
   0  -7   2   95.24    9.30
   0  -7   2   81.34    8.83
   0  -7   3  215.79   22.28
   0  -7   3  269.32   22.65
   0   7   4    3.15    2.15
   0  -7   4    7.78    3.60
   0  -7   5  374.79   23.93
   0   7   5  213.91   22.93
   0  -7   6  167.08   12.10
   0   7   6   96.79   11.18
   0  -7   7  220.11   15.15
   0   7   7  120.82   14.25
   0  -7   8    8.10    4.50
   0   7   8    0.83    3.15
   0   7   8    0.88    2.00
   0   7   9   34.48    4.60
   0   7   9   25.88    3.73
   0   7  10   34.93    4.78
   0   7  10   50.51    5.55
   0   7  11   35.28    4.95
   0   7  11   31.06    4.35
   0   7  12   61.09    6.13
   0   7  12   38.08    5.55
   0   7  13   17.90    2.85
   0   7  13   27.38    3.50
   0   7  14   25.23    2.98
   0  -8   0  173.05   17.93
   0  -8   0  190.63   17.68
   0  -8  -1   27.58    4.20
   0  -8   1   29.00    4.53
   0  -8   1   28.33    5.33
   0  -8  -1   23.45    5.43
   0  -8  -2    2.38    3.00
   0  -8  -2    3.78    4.98
   0  -8   2   -1.05    3.63
   0  -8   2   -1.88    3.50
   0  -8   3  121.12   10.65
   0  -8   3  114.97   10.90
   0  -8   4    1.18    3.35
   0  -8   5   87.49   11.08
   0   8   5  119.29   10.60
   0   8   6   42.06    5.08
   0  -8   6   55.91    5.88
   0  -8   7   36.03    4.25
   0   8   7    7.88    2.83
   0  -8   8    8.65    3.60
   0   8   8    5.25    2.48
   0  -8   9   26.40    4.53
   0   8   9   23.80    3.55
   0   8  10    2.48    2.55
   0  -8  10    2.50    3.30
   0   8  11   54.43    6.15
   0  -8  11   63.86    6.83
   0   8  12    5.50    2.28
   0   8  13   66.79    6.70
   0   8  14    0.08    1.45
   0  -9   0    0.18    3.23
   0  -9   0    3.48    4.83
   0  -9   1   48.03    5.80
   0  -9   1   40.41    6.60
   0  -9  -1   55.73    5.98
   0  -9  -2   25.25    5.78
   0  -9  -2   44.98    4.98
   0  -9   2   37.96    5.60
   0  -9   2   40.81    5.10
   0  -9  -3    2.18    4.38
   0  -9   3    1.20    3.40
   0  -9  -3   -0.40    2.65
   0  -9   4   32.88    4.95
   0  -9  -4   33.91    4.28
   0  -9  -4   46.96    5.78
   0  -9   5   18.45    3.60
   0  -9  -5   24.58    4.68
   0  -9   6   17.70    3.55
   0  -9   7   53.86    5.93
   0   9   7   46.63    5.15
   0  -9   8    8.83    3.03
   0   9   8   10.63    2.33
   0   9   9   16.20    2.55
   0  -9   9   13.45    3.25
   0  -9  10   35.88    4.93
   0   9  10   42.06    4.38
   0  -9  11    6.10    2.75
   0   9  11    6.53    1.85
   0  -9 -12   37.26    3.35
   0   9  12   25.10    3.35
   0 -10   0   45.16    4.68
   0 -10   0   27.08    5.68
   0 -10  -1    1.05    2.30
   0 -10  -1   -0.33    4.03
   0 -10   1    1.95    3.78
   0 -10  -2   48.76    4.78
   0 -10   2   36.71    5.80
   0 -10  -2   32.78    5.90
   0 -10   3    1.30    3.58
   0 -10   4   24.95    4.08
   0 -10   5   38.68    6.03
   0 -10  -5   65.29    6.03
   0 -10   6  103.22   14.08
   0 -10  -6  181.86   14.03
   0 -10   7   22.88    4.00
   0 -10  -7   30.46    3.70
   0 -10   8   22.85    3.98
   0 -10  -8   35.28    3.63
   0 -10  -9    1.13    1.63
   0 -10   9   -0.78    2.33
   0 -10  10    0.25    2.28
   0 -11   0   -2.00    3.10
   0 -11   1   26.28    4.20
   0 -11  -1   20.98    4.10
   0 -11  -2    2.50    3.15
   0 -11   2    0.55    3.08
   0 -11  -3   68.01    5.25
   0 -11   3   19.93    4.88
   0 -11  -4    2.60    2.88
   0 -11   4    0.60    2.73
   0 -11   5   49.28    8.60
   0 -11  -5  123.50    8.65
   0 -11   6   -0.18    2.40
   0 -11  -6    0.83    2.10
   0 -11  -7   31.03    3.00
   0 -11   7   14.83    3.30
   0 -11   8    0.05    1.85
   0 -11  -8   -0.35    1.25
   0 -12   0   51.53    5.35
   0 -12  -1    1.70    2.08
   0 -12   1    0.23    1.85
   0 -12  -2   50.56    3.55
   0 -12   2   12.40    3.23
   0 -12   3    0.08    1.75
   0 -12  -3   -0.50    1.70
   0 -12   4    5.45    1.83
   0 -12  -4   15.65    1.88
  -1   0  17   -1.55    3.08
  -1   0  16   45.01    5.80
  -1   0  15   -3.58    3.83
  -1   0  14  106.34   11.28
  -1   0  13   -2.65    3.83
  -1   0  13    0.20    2.75
  -1   0  12  105.29   11.25
  -1   0  12  110.84   11.08
  -1   0  11    1.38    2.95
  -1   0  11   -1.95    3.40
  -1   0  10  175.98   15.68
  -1   0  10  149.40   15.70
  -1   0   9   -0.23    2.15
   1   0  -9   -0.98    3.15
  -1   0   9   -1.45    2.10
   1   0  -9   -2.95    4.10
   1   0  -8 1365.70  149.73
  -1   0   8 1654.50  149.38
  -1   0   8 1766.57  149.38
   1   0  -8 1417.79  149.60
  -1   0   7    0.38    1.48
   1   0  -7    1.28    2.28
   1   0  -7    0.08    1.98
   1   0  -6  926.46   91.07
  -1   0   6 1120.14   91.67
   1   0  -5    1.63    1.85
  -1   0   5   -0.13    3.13
  -1   0   4 6301.93  594.45
   1   0  -4 6470.56  594.27
   1   0  -3    0.78    1.33
  -1   0   3    0.10    1.93
  -1   0   2 4220.83  391.27
   1   0  -1    0.63    0.68
  -1   0   0 5904.99  566.69
   1   0   0 6257.50  566.67
  -1   0  -1   -0.03    1.03
   1   0   1    0.15    0.93
   1   0   2 1585.59  137.70
   1   0   2 1279.06  137.97
   1   0   3    1.90    3.23
   1   0   3    5.65    5.30
   1   0   4    7.73    3.30
   1   0   4    0.30    4.28
   1   0   5   -0.08    3.60
   1   0   5    1.13    3.30
   1   0   6  246.99   21.90
   1   0   6  232.14   21.90
   1   0   7    0.63    4.33
   1   0   7    1.38    1.80
   1   0   8    6.78    2.50
   1   0   8    3.38    2.25
   1   0   8    3.53    4.25
   1   0   9    0.45    2.85
   1   0   9    2.33    4.18
   1   0   9    0.18    2.40
   1   0  10    5.63    3.38
   1   0  10    3.28    2.70
   1   0  11    1.48    3.33
   1   0  11    0.65    2.35
   1   0  12   -3.45    2.25
   1   0  12    0.05    2.88
   1   0  13    0.05    2.58
   1   0  14    0.60    2.38
   1   0  15    1.60    2.50
   1   0  16    4.25    2.43
  -1   1  18   10.05    3.38
  -1  -1  17   25.00    4.50
  -1   1  17   42.03    5.05
  -1   1  16   34.16    4.80
  -1  -1  16   16.98    4.00
  -1  -1  15   47.51    5.98
  -1   1  15   38.38    5.25
  -1   1  14    8.93    3.00
  -1   1  14   13.18    4.03
  -1  -1  14    8.63    3.98
  -1  -1  13   53.41    7.33
  -1   1  13   47.58    7.20
  -1   1  12    0.98    3.35
  -1  -1  12    3.05    3.78
  -1   1  12    3.40    4.18
  -1   1  11  109.77   10.63
  -1  -1  11  126.05   10.80
  -1   1  10   11.15    3.43
  -1  -1  10   17.45    3.35
  -1   1  10   23.03    3.75
  -1   1   9  869.90   64.16
   1   1  -9  920.40   65.01
   1   1  -9  700.37   64.56
  -1   1   9  414.87   64.99
  -1   1   9  502.01   64.04
  -1  -1   9  764.73   64.09
  -1  -1   8  123.05   11.18
   1  -1  -8   95.67   11.78
   1   1  -8  120.50   11.88
  -1   1   8  122.40   11.25
   1   1  -8  113.67   11.73
  -1  -1   8  118.07   11.25
  -1   1   8  125.55   11.23
   1  -1  -7   62.44    7.15
  -1   1   7   65.61    6.45
  -1  -1   7   65.19    6.43
   1   1  -7   67.61    7.10
   1   1  -7   73.51    7.25
  -1   1   7   70.59    6.48
  -1   1   6    5.25    3.93
   1  -1  -6   10.50    2.95
   1   1  -6   10.10    2.50
   1   1  -6   11.30    2.65
   1   1  -6    9.68    2.80
   1  -1  -5  595.45   55.08
   1   1  -5  735.37   55.13
   1   1  -5  686.32   55.13
   1   1  -5  734.50   55.16
   1  -1  -4  455.85   47.83
   1   1  -4  475.33   47.73
   1  -1  -4  550.37   47.61
   1   1  -4  573.17   47.83
   1   1  -4  481.38   47.73
   1  -1  -3  602.60   55.58
   1   1  -3  659.56   55.51
   1   1  -3  590.17   55.46
   1  -1  -3  604.75   55.26
   1   1  -3  525.41   55.41
  -1  -1   2 2815.57  213.96
   1  -1  -2 2502.44  214.04
   1   1  -2 2360.27  213.86
   1  -1  -1 6511.24  603.45
   1   1   0  184.68   16.53
  -1   1   0  165.70   16.23
   1   1   0  184.81   16.10
   1  -1   0  155.28   16.18
   1  -1   1 4234.46  400.59
  -1  -1  -1 4523.76  400.47
  -1   1  -1 4143.07  400.52
  -1  -1  -2  389.92   33.96
  -1   1  -2  338.68   33.93
   1  -1   3 1886.87  142.02
  -1   1  -3 1726.16  141.65
  -1   1  -3 1708.74  141.70
  -1  -1  -3 1647.20  141.62
  -1   1  -3 1368.83  141.35
   1  -1   4  352.06   42.51
  -1   1  -4  475.33   42.21
   1   1   4  525.81   42.63
  -1   1  -4  527.69   42.33
  -1  -1  -4  457.15   42.16
  -1   1  -4  422.07   41.86
   1   1   4  574.82   43.43
   1  -1   5  437.35   56.08
  -1   1  -5  588.30   55.33
  -1  -1  -5  617.58   55.66
  -1   1  -5  686.26   55.78
   1   1   5  617.28   56.51
   1  -1   6 1411.11  123.62
   1  -1   6 1349.40  123.60
  -1   1  -6 1371.25  124.07
   1   1   6 1146.24  124.55
   1  -1   6  944.56  124.40
  -1   1  -6 1349.73  123.67
  -1  -1  -6 1282.29  124.00
   1  -1   7  200.13   32.36
  -1   1  -7  369.49   32.48
   1  -1   7  421.05   32.46
   1   1   7  426.47   32.36
  -1  -1  -7  337.61   32.88
   1   1   7  301.55   33.61
   1  -1   7  389.47   32.41
   1  -1   7  218.39   33.36
  -1  -1  -8   65.81    7.33
   1   1   8   80.36    6.20
   1   1   8   51.46    8.00
   1  -1   8   36.51    8.18
   1  -1   8   76.61    6.53
   1   1   8   32.78    6.48
   1  -1   8   36.46    6.35
   1  -1   8   90.82    6.55
   1   1   9   14.98    3.25
   1   1   9   17.65    2.40
   1   1   9    7.18    3.25
   1  -1   9   12.25    3.33
   1  -1   9   21.15    3.60
   1   1  10   29.00    4.15
   1  -1  10   18.93    3.83
   1   1  10   17.25    4.30
   1  -1  10   35.21    4.93
   1   1  11    1.98    2.93
   1  -1  11    4.28    2.95
   1   1  11    2.43    3.50
   1   1  12   15.95    4.23
   1  -1  12   16.10    3.28
   1   1  12   23.68    3.53
   1  -1  13    4.60    2.50
   1   1  13    8.80    3.30
   1   1  13    5.40    2.38
   1  -1  14    3.45    2.25
   1   1  14    4.73    3.30
   1   1  14    2.30    1.98
   1  -1  15    1.93    2.30
   1   1  15    3.50    2.93
   1   1  16   44.08    5.30
   1   1  17    6.23    2.40
  -1   2  18   -0.30    2.98
  -1   2  17   30.66    4.93
  -1   2  16   29.20    5.03
  -1   2  16   32.58    4.13
  -1   2  15   14.48    4.68
  -1  -2  15   16.53    4.18
  -1   2  15   25.98    3.65
  -1   2  14    9.05    3.30
  -1  -2  14    6.60    3.65
  -1   2  14    0.60    3.85
  -1   2  13    5.93    3.55
  -1  -2  13    3.05    3.65
  -1   2  13    0.73    3.80
  -1  -2  12   16.05    4.33
  -1   2  12   13.15    3.93
  -1   2  12    9.45    4.38
  -1  -2  11    0.88    3.13
  -1   2  11   -1.38    3.48
  -1  -2  10   39.73    4.58
  -1   2  10   30.46    4.93
  -1   2   9   56.63    6.45
   1   2  -9   50.23    7.25
  -1  -2   9   66.89    6.25
  -1  -2   9   61.31    6.63
  -1  -2   8   21.65    2.73
  -1   2   8   13.90    5.40
  -1  -2   8   23.08    2.90
   1   2  -8   20.15    4.18
  -1   2   8   18.63    3.00
  -1  -2   8   19.23    3.05
   1   2  -8   24.80    3.88
   1  -2  -8   18.85    4.13
  -1   2   8   21.50    3.10
   1   2  -7    5.35    2.75
  -1  -2   7   15.58    2.33
   1   2  -7    8.45    3.80
  -1   2   7    7.08    2.13
  -1   2   7    3.85    4.58
   1   2  -7   13.95    3.30
   1  -2  -7    4.40    3.45
  -1   2   7    9.10    2.28
   1   2  -6    6.55    2.08
   1  -2  -6    3.90    3.23
  -1   2   6    5.23    1.63
   1   2  -6    4.98    2.58
   1   2  -6    5.80    2.78
   1   2  -5   85.61    8.65
   1   2  -5   87.16    8.58
   1  -2  -5   72.94    8.85
   1   2  -5   81.66    8.28
   1   2  -4   96.29    7.58
   1  -2  -4   71.46    7.93
   1   2  -4   78.06    7.05
  -1  -2   3   52.13    5.40
   1   2  -3   36.38    4.58
  -1  -2   2 3685.34  282.25
   1   2  -2 3305.13  282.15
  -1   2   1   57.16    4.93
   1   2  -1   43.16    5.90
  -1   2   0 1002.34   80.11
   1  -2   0  765.15   80.01
   1   2   1  338.78   27.90
   1  -2   1  272.35   27.73
  -1   2  -1  284.27   27.65
   1  -2   2  173.38   14.00
   1  -2   2  141.07   13.28
   1   2   2  135.47   13.63
  -1   2  -2  150.35   13.68
  -1  -2  -3 1358.70  126.50
  -1   2  -4  182.83   19.48
  -1  -2  -4  215.51   19.75
   1   2   5 2105.23  177.85
  -1   2  -5 1748.84  176.78
  -1  -2  -5 1937.05  176.90
   1  -2   5 1964.40  177.35
  -1   2  -5 1935.57  176.90
   1   2   6  859.02   72.14
  -1  -2  -6  831.49   72.79
   1  -2   6  873.35   72.24
   1   2   6  951.71   73.66
  -1   2  -6  668.44   72.14
  -1   2  -6  718.67   72.59
  -1   2  -6  824.39   72.76
   1  -2   7  320.88   20.23
  -1  -2  -7  256.72   20.95
   1   2   7  242.54   21.45
   1  -2   7  150.20   21.38
   1  -2   7  138.82   19.98
  -1   2  -7  190.41   19.90
   1   2   7  262.02   19.98
  -1   2  -7  241.57   20.80
   1  -2   8   80.96   14.75
   1  -2   8   88.61   13.33
   1   2   8  165.63   13.30
   1  -2   8  206.41   13.68
   1   2   9   72.79    9.83
   1  -2   9   72.51    9.65
   1  -2  10    8.00    3.05
   1   2  10    9.98    3.55
   1   2  10    9.58    3.60
   1   2  11   25.78    5.08
   1  -2  11   30.31    4.45
   1   2  12   -2.40    3.45
   1  -2  12    0.78    2.60
   1   2  12   -0.05    3.20
   1   2  13   32.91    5.63
   1  -2  13   35.98    5.03
   1   2  14    2.73    2.45
   1   2  14   -2.18    3.35
   1  -2  14    0.90    2.45
   1   2  15  165.23   14.95
   1   2  15  140.40   15.18
   1   2  16    6.05    3.13
   1   2  17   28.93    3.73
  -1   3  17    1.28    2.18
  -1   3  17   -3.85    3.13
  -1   3  16   24.23    3.90
  -1   3  15   -1.75    3.05
  -1   3  14    7.43    3.78
  -1   3  13    4.35    3.60
  -1   3  12   27.28    6.75
  -1   3  12  110.72    7.50
  -1   3  11   -2.78    4.18
  -1   3  11   -0.73    3.68
  -1   3  10   95.59    9.63
  -1   3  10   89.92    9.90
  -1  -3  10  101.72   10.28
  -1  -3   9   45.56    5.40
  -1   3   9   42.78    5.05
  -1   3   9   33.38    4.83
  -1  -3   9   44.81    4.88
   1   3  -8   33.11    5.83
  -1   3   8   41.31    6.78
  -1   3   8   38.61    4.68
   1   3  -8   44.73    5.38
  -1  -3   8   46.13    4.53
  -1   3   8   35.43    4.48
   1   3  -8   46.56    6.60
  -1  -3   8   48.38    4.98
  -1  -3   7    9.65    2.45
  -1   3   7    6.05    1.93
   1   3  -7   10.63    3.73
  -1  -3   7    7.33    1.83
   1   3  -7    8.80    2.85
   1   3  -7   10.58    4.40
  -1   3   6   21.15    2.85
  -1   3   6   17.43    2.58
   1   3  -6   23.53    3.55
  -1  -3   6   27.58    2.98
   1   3  -6   31.38    4.73
   1   3  -6   25.35    4.23
   1   3  -5   23.58    4.13
   1   3  -5   22.93    3.38
   1   3  -4  143.27   14.95
  -1  -3   4  177.25   15.43
   1   3  -3  328.46   25.78
  -1  -3   3  204.86   25.88
  -1  -3   2   54.08   13.35
  -1   3   2  159.53   12.68
  -1   3   1  547.22   48.11
  -1  -3   1  396.37   48.98
  -1   3   0   19.70    3.08
  -1  -3   0   13.60    6.98
  -1   3  -1  126.05   14.13
   1   3   1  149.40   14.53
   1  -3   2   31.43    4.23
  -1   3  -2   31.63    4.30
   1   3   2   37.53    4.88
  -1   3  -3   27.50    3.95
   1  -3   3   26.68    3.50
   1  -3   3   26.38    4.18
   1   3   3   29.20    4.28
  -1   3  -4  495.21   46.41
  -1   3  -4  490.06   46.41
  -1  -3  -5  814.36   65.74
  -1   3  -5  916.80   65.64
   1  -3   5  581.00   64.81
   1   3   5 1099.28   67.59
   1   3   5  704.29   64.71
   1  -3   6  403.94   43.78
  -1  -3  -6  534.91   44.78
  -1   3  -6  590.90   44.78
  -1   3  -6  448.83   44.33
   1  -3   6  592.82   45.33
   1   3   6  455.35   43.66
  -1   3  -7   31.61    5.08
   1   3   7   26.25    2.98
  -1   3  -7   25.03    4.38
  -1  -3  -7   29.00    5.60
   1  -3   7   21.58    3.50
   1  -3   8  483.28   54.43
   1   3   8  695.89   54.48
   1   3   9    9.23    3.60
   1  -3   9    8.03    3.78
   1   3  10  189.63   14.18
   1   3  10  143.10   14.10
   1  -3  11    7.20    4.85
   1   3  11    9.28    3.75
   1   3  12   75.09    8.30
   1   3  13    5.28    3.28
   1   3  14  114.77   11.50
   1   3  15    2.03    2.65
   1   3  15   -0.35    2.78
   1   3  16   23.18    5.15
   1   3  16   62.06    4.95
   1   3  17    0.13    1.83
  -1   4  17    1.55    2.78
  -1   4  17    1.15    2.03
  -1   4  16    7.30    2.78
  -1   4  16    1.80    3.15
  -1   4  15    2.85    3.00
  -1   4  15    2.98    3.50
  -1   4  14   14.13    4.43
  -1   4  14   37.16    4.98
  -1   4  13   21.28    4.03
  -1   4  13    6.35    4.05
  -1   4  12  110.79   16.78
  -1   4  12  262.34   17.10
  -1   4  11   28.33    4.38
  -1   4  11   27.05    4.83
  -1   4  10  144.10   12.40
  -1  -4  10   94.17   12.95
  -1  -4   9    7.38    4.08
  -1   4   9   11.23    2.85
  -1  -4   9    4.10    2.90
  -1   4   8  159.30   16.00
  -1  -4   8  150.70   16.35
  -1   4   8  197.18   16.18
   1   4  -7   96.22    9.95
  -1   4   7   61.69    7.48
  -1   4   7   73.54    7.68
   1   4  -7   99.97   10.23
  -1  -4   7   94.42    8.00
  -1  -4   6   62.51    9.23
   1   4  -6  123.20   10.55
   1   4  -6  150.10   11.48
  -1   4   6   93.67    9.03
  -1   4   6  110.02    9.18
  -1   4   5   26.98    2.43
  -1  -4   5    4.95    2.60
   1   4  -4   88.46    6.25
  -1  -4   4   14.33    5.33
   1   4  -3  288.87   24.08
  -1   4   3  284.80   23.40
  -1  -4   2 1210.40  114.22
  -1   4   2 1210.18  112.89
   1   4  -2 1226.03  113.24
  -1   4   1  341.01   33.21
  -1  -4   1  433.17   35.43
  -1   4   0 1804.08  167.10
  -1  -4   0 1770.52  168.90
  -1   4  -1  289.67   30.16
   1   4   1  321.25   30.53
  -1   4  -2 1047.40  111.17
   1   4   2 1184.20  111.42
   1   4   3  174.63    8.08
  -1   4  -3  160.75    7.35
   1  -4   4   12.88    2.48
   1  -4   4    8.90    2.83
  -1   4  -5  597.38   26.35
   1  -4   5  151.00   23.98
  -1   4  -5  480.96   25.60
   1  -4   5  260.42   24.15
   1  -4   6    0.85    2.23
  -1   4  -6   -0.68    3.95
   1  -4   6    2.13    2.80
   1   4   7  227.66   15.65
   1  -4   7  232.56   16.08
   1  -4   8    0.80    3.23
   1  -4   8    4.88    4.10
   1   4   8    4.45    2.85
   1   4   9  266.69   18.30
   1  -4   9  244.32   18.60
   1   4  10   12.25    3.93
   1  -4  10    5.38    4.05
   1   4  10    5.95    4.70
   1  -4  10   11.20    5.48
   1   4  11  202.16   13.85
   1  -4  11  211.71   14.85
   1   4  12    5.70    3.98
   1   4  12    7.80    3.58
   1   4  13   34.13    5.33
   1   4  13   46.98    5.53
   1   4  14    1.23    3.15
   1   4  14    1.13    2.85
   1   4  15    8.70    2.58
   1   4  15    5.40    3.08
   1   4  16   -0.08    1.70
  -1   5  16    2.13    2.58
  -1   5  16   12.33    2.90
  -1   5  15   27.20    3.70
  -1   5  15    9.20    3.40
  -1   5  14    2.93    3.63
  -1   5  14    0.95    3.45
  -1   5  13  114.27   10.80
  -1   5  13   94.22   11.05
  -1   5  12    1.93    3.05
  -1   5  11  154.33   13.15
  -1  -5  11   94.34   13.80
  -1   5  10  211.84   16.18
  -1   5  10  186.73   15.83
  -1   5   9  342.48   23.05
  -1   5   9  260.22   22.73
  -1   5   8    1.13    2.90
  -1   5   8   -0.33    2.15
  -1  -5   8    0.93    3.78
  -1   5   7  388.67   34.26
  -1   5   7  500.86   34.46
  -1   5   6   -0.20    1.98
  -1  -5   6   -1.45    2.60
  -1   5   6   -0.45    1.48
  -1   5   5  246.32   69.51
  -1  -5   5  326.00   69.44
   1   5  -5 1221.95   70.69
  -1  -5   5  531.89   68.99
  -1   5   5  987.29   68.91
  -1   5   5  818.91   68.81
  -1  -5   4  159.23   17.73
   1   5  -4  227.39   17.83
  -1   5   4   82.26   17.83
  -1  -5   4  246.39   16.60
  -1  -5   4  164.50   16.53
  -1   5   4  156.70   16.20
  -1  -5   3  556.22   45.18
  -1  -5   3  465.78   45.03
   1   5  -3  471.63   45.81
  -1   5   3  457.95   45.13
  -1  -5   3  558.64   46.71
   1   5  -2    1.68    3.25
  -1   5   2    0.95    2.38
  -1  -5   2   -3.38    5.93
  -1   5   1  261.52   26.53
   1   5  -1  280.60   26.85
   1  -5   0  329.96   31.21
   1  -5   0  250.59   26.88
  -1   5   0  329.11   27.28
  -1  -5   0  336.18   31.11
   1  -5   1  130.87   13.78
   1   5   1  143.62   14.60
  -1   5  -1  154.23   14.28
  -1  -5  -1  143.70   17.98
   1  -5   1  156.58   16.68
  -1   5  -2   61.41    7.03
   1  -5   2   58.33    5.90
   1   5   2   77.16    8.08
   1  -5   2   63.41    6.38
   1  -5   3  138.12   18.98
   1  -5   3  275.07   18.75
   1  -5   3  136.17   18.48
   1   5   3  266.29   19.70
  -1   5  -3  240.77   19.38
  -1   5  -4   -2.95    3.68
   1  -5   4   -0.65    2.48
   1  -5   4    1.10    2.35
   1  -5   4    0.25    2.38
   1   5   5  258.49   20.00
   1  -5   5  270.47   20.40
   1   5   6   23.68    2.75
   1  -5   6   17.78    3.45
   1   5   7   50.76    4.85
   1  -5   7   36.81    4.83
   1   5   7   41.33    4.45
   1   5   8   12.98    3.88
   1  -5   8   13.93    3.48
   1   5   8   12.80    3.15
   1  -5   9   52.08    5.85
   1   5   9   51.33    5.48
   1   5  10   69.36    7.10
   1  -5  10   91.12    7.68
   1   5  11   25.13    4.40
   1  -5  11    7.60    5.93
   1   5  12   45.96    6.43
   1   5  12   50.16    5.80
   1   5  13    2.88    3.15
   1   5  13   -0.05    3.43
   1   5  14    2.38    2.78
   1   5  14    1.43    3.10
   1   5  15    2.48    2.35
   1   5  15    1.70    2.58
   1   5  16   -0.03    1.88
  -1   6  16    7.75    2.05
  -1   6  16    4.43    2.28
  -1   6  15   20.33    3.35
  -1   6  15   15.00    2.93
  -1   6  14   40.73    4.78
  -1   6  13    9.58    2.93
  -1   6  12   42.81    5.28
  -1   6  12   47.58    5.95
  -1  -6  11    5.63    4.60
  -1   6  11    2.58    3.68
  -1   6  11    2.73    2.60
  -1  -6  10  104.34   10.98
  -1   6  10   93.02    9.90
  -1   6  10  112.72   10.30
  -1   6   9   21.90    3.48
  -1  -6   9   26.53    5.30
  -1   6   9   25.38    4.40
  -1  -6   8  725.32   62.54
  -1   6   8  592.55   61.99
  -1   6   8  768.93   62.19
  -1   6   7   30.28    3.90
  -1   6   7   20.38    3.18
  -1  -6   7   28.55    4.70
  -1  -6   6 1296.59  109.69
  -1   6   6 1123.16  109.37
  -1   6   5   24.38    3.38
  -1  -6   5   27.00    4.38
  -1  -6   5   27.13    4.10
  -1  -6   4 1533.16  100.02
  -1  -6   4 1476.12  101.97
  -1  -6   3  143.95   11.55
  -1  -6   3  174.68   11.73
   1   6  -3  127.85   12.88
  -1  -6   3  142.55   13.68
  -1  -6   2  426.37   39.86
  -1  -6   2  460.35   42.71
  -1   6   2  440.45   42.28
   1   6  -2  402.87   40.76
  -1  -6   2  428.02   40.06
   1   6  -1  151.68   14.65
  -1   6   1  146.52   14.33
  -1  -6   1  172.60   17.45
   1  -6  -1  164.15   20.28
   1  -6  -1  159.10   13.55
  -1   6   1  117.17   16.60
   1  -6   0  418.65   45.63
   1   6   0  436.05   42.81
   1  -6   0  492.96   42.46
   1  -6   0  471.73   42.08
  -1   6   0  439.85   42.76
  -1  -6   0  387.01   45.36
   1   6   0  350.28   42.91
  -1   6  -1   58.83    7.73
   1   6   1   60.01    8.35
   1   6   1   60.19    7.43
   1  -6   1   58.88    9.35
   1  -6   1   89.36    7.48
  -1  -6  -1   63.29   12.63
   1  -6   1   66.04    6.68
   1  -6   2  189.93   15.93
  -1   6  -2  111.62   14.13
   1  -6   2  120.52   13.28
   1  -6   2  160.45   13.88
   1   6   2  124.62   13.83
  -1  -6  -2   94.82   17.75
   1   6   2  115.29   14.55
   1  -6   2  223.11   13.90
   1  -6   3   -1.23    3.33
  -1   6  -3    1.78    3.80
   1  -6   3   -1.83    2.85
   1   6   3   -1.50    4.10
   1  -6   4   41.76    6.85
   1  -6   4   78.64    6.73
   1  -6   5   28.45    5.43
   1   6   5   34.23    4.18
   1   6   5   37.23    4.45
   1   6   6   64.71    6.85
   1   6   6   59.31    6.58
   1   6   7    5.08    3.25
   1   6   7    4.00    2.38
   1  -6   7    3.70    4.10
   1  -6   7    6.55    3.08
   1  -6   8    0.23    4.53
   1  -6   8    3.38    3.00
   1   6   8   -1.40    2.50
   1   6   8    0.25    3.63
   1   6   9    1.55    2.50
   1  -6   9    6.23    3.08
   1  -6   9    0.05    4.43
   1   6   9    0.85    3.40
   1   6  10   34.31    4.68
   1  -6  10   36.56    4.25
   1   6  10   23.88    3.80
   1  -6  10   17.30    5.55
   1  -6  11    0.05    2.83
   1  -6  11   -3.85    4.75
   1   6  11   -3.35    2.73
   1   6  11    0.03    3.80
   1  -6  12    2.98    5.23
   1   6  12    4.45    2.83
   1   6  13    0.55    2.35
   1   6  14   -1.13    2.85
   1   6  14   -2.58    2.30
   1   6  15    4.80    2.15
   1   6  15    4.70    1.85
  -1   7  14   14.45    2.60
  -1   7  14   24.43    3.20
  -1   7  13   21.63    3.20
  -1   7  13   29.15    3.83
  -1   7  12   39.88    5.13
  -1   7  12   66.19    5.93
  -1   7  11    5.73    2.30
  -1   7  11    3.95    3.23
  -1   7  10   57.43    6.35
  -1   7  10   44.43    5.88
  -1   7   9   -0.83    2.13
  -1   7   9    1.75    2.93
  -1  -7   9   -2.23    3.93
  -1  -7   8    5.18    4.00
  -1   7   8    4.53    3.03
  -1  -7   7  931.98   59.31
  -1   7   7  538.49   58.61
  -1  -7   6  110.89    8.83
  -1   7   6   68.71    8.08
  -1   7   5  563.92   58.28
  -1  -7   5  670.46   58.56
  -1  -7   5  767.25   58.83
  -1   7   4  116.04   12.30
  -1  -7   4  141.70   12.95
  -1  -7   4  156.45   12.93
  -1  -7   3  351.01   26.03
  -1  -7   3  217.49   25.80
   1  -7  -2   79.24   14.40
  -1  -7   2  111.42   13.88
  -1  -7   2  186.63   14.05
   1  -7  -2  160.90   13.63
   1  -7  -1   -0.13    4.33
   1  -7  -1    3.03    2.48
  -1  -7   1    3.33    3.08
   1  -7   0   28.48    3.95
   1  -7   0   35.31    5.40
   1  -7   1   65.29    6.43
   1  -7   1   45.96    5.58
   1  -7   2  246.42   19.05
   1  -7   2  276.15   18.88
   1  -7   3  163.28   12.50
   1  -7   3  183.61   12.95
   1   7   4  129.50   14.50
   1  -7   4  159.33   14.85
   1  -7   5  120.07   12.35
   1   7   5  113.12   12.13
   1  -7   6   88.59    9.73
   1   7   6   89.92    9.73
   1   7   7    5.95    2.15
   1  -7   7   11.25    2.60
   1   7   7   10.75    3.15
   1  -7   8   51.76    6.15
   1   7   8   66.24    6.30
   1   7   8   49.56    5.80
   1   7   9    9.70    2.25
   1  -7   9   16.93    4.73
   1   7   9   13.43    3.38
   1  -7   9    8.93    2.53
   1   7  10   49.63    5.68
   1   7  10   36.16    4.78
   1   7  11    2.78    2.05
   1   7  11    6.80    3.15
   1   7  12   32.81    4.28
   1   7  12   49.01    4.88
   1   7  13    2.80    1.83
   1   7  13    2.85    2.63
   1   7  14    5.80    1.45
  -1   8  14   16.23    2.45
  -1   8  13    7.50    2.23
  -1   8  12    9.93    2.53
  -1  -8  11    4.25    3.10
  -1   8  11    4.55    2.50
  -1   8  10    4.13    2.70
  -1  -8  10    1.93    2.95
  -1  -8   9   21.23    4.33
  -1   8   9   29.40    3.80
  -1   8   8   58.48    6.63
  -1  -8   8   72.61    7.25
  -1  -8   7   51.26    5.78
  -1   8   7   44.33    5.20
  -1   8   6    5.80    2.53
  -1  -8   6    4.38    2.85
  -1   8   5   34.33    3.88
  -1  -8   5   21.10    4.13
  -1  -8   4    3.75    2.85
  -1  -8   4    5.98    3.98
   1  -8  -3  243.42   23.55
  -1  -8   3  173.88   22.93
  -1  -8   2    3.48    4.30
  -1  -8   2    0.83    2.80
   1  -8  -2    3.45    2.78
   1  -8  -2   -1.53    5.05
  -1  -8   1  319.60   35.46
   1  -8  -1  240.19   35.43
  -1  -8   1  490.23   35.48
   1  -8  -1  422.52   35.13
   1  -8   0    4.48    4.20
   1  -8   0    3.08    2.75
  -1  -8   0    4.63    3.75
   1  -8   1  182.48   18.18
   1  -8   1  220.06   17.88
   1  -8   1  164.48   17.30
   1  -8   2   38.21    5.03
   1  -8   2   31.43    5.75
   1  -8   3  134.32   15.75
   1  -8   3  235.39   16.60
   1  -8   4   44.91    6.18
   1   8   4   55.71    6.00
   1  -8   5   75.34   11.28
   1   8   5  122.92   11.25
   1  -8   6   -0.58    1.78
   1   8   6   -2.08    2.35
   1  -8   6   -1.05    3.70
   1   8   7    2.68    3.23
   1  -8   7   87.16    5.68
   1   8   8    5.35    2.60
   1  -8   8   10.18    3.90
   1   8   9   99.67   12.10
   1  -8   9  215.94   13.28
   1  -8  10   22.88    4.23
   1   8  10   10.23    2.73
   1   8  11   84.66   10.40
   1  -8  11  189.56   11.50
   1   8  12    5.05    2.23
   1   8  13   32.01    3.55
   1  -9 -13    0.60    1.15
  -1   9  12    4.93    1.80
   1  -9 -12    8.93    1.85
  -1   9  11    2.78    1.75
  -1  -9  10   -1.08    2.45
  -1   9  10    4.88    2.03
  -1   9   9    0.78    1.95
  -1  -9   9    0.10    2.38
  -1   9   8   18.98    2.65
  -1  -9   8   13.00    3.20
  -1  -9   7   21.58    3.78
  -1   9   7   26.85    3.20
  -1  -9   6    0.45    2.38
   1  -9  -6    3.08    3.93
   1  -9  -5   28.20    4.60
  -1  -9   5    9.50    2.80
   1  -9  -4   22.45    4.70
  -1  -9   4   11.35    3.08
  -1  -9   3    3.58    2.83
   1  -9  -3   -2.05    4.38
  -1  -9   3   -0.28    3.70
  -1  -9   2    5.30    3.13
  -1  -9   2    5.15    3.93
   1  -9  -2    4.70    4.58
   1  -9  -1    1.98    3.88
  -1  -9   1   -1.68    3.60
  -1  -9   1   -0.65    4.00
   1  -9  -1    3.05    2.43
   1  -9   0   -2.23    4.70
   1  -9   0    2.10    3.50
  -1  -9   0    1.45    4.33
  -1  -9   0   -0.08    3.73
  -1  -9  -1    5.45    3.55
   1  -9   1    2.05    4.53
   1  -9   1   -0.05    3.38
  -1  -9  -2    8.88    3.35
   1  -9   2    1.30    3.98
   1  -9   2    5.23    2.78
   1  -9   3   38.53    5.75
  -1  -9  -3   37.33    4.83
   1  -9   4  257.97   24.88
   1  -9   5   95.74   10.13
   1   9   6   15.00    2.50
   1  -9   6   26.08    4.30
   1   9   7   18.58    2.98
   1  -9   7   44.38    4.83
   1  -9   8   28.55    4.30
   1   9   8   12.20    2.50
   1   9   9    2.80    2.03
   1  -9   9    7.55    3.35
   1   9  10   53.56    6.35
   1  -9  10   97.09    7.23
   1   9  11    3.50    1.60
   1  -9  11    5.15    2.93
   1   9  12   45.01    4.45
   1 -10 -11    2.13    1.13
   1 -10 -10   19.73    2.48
   1 -10  -9    1.50    1.90
  -1 -10   9    0.03    2.08
  -1 -10   8   16.75    3.48
   1 -10  -8   34.38    3.50
  -1 -10   7    1.55    2.40
   1 -10  -7    2.73    2.73
   1 -10  -6   44.76    4.45
  -1 -10   6   20.30    4.10
  -1 -10   5    1.35    2.58
   1 -10  -5    6.90    3.38
  -1 -10   4   17.98    3.95
   1 -10  -4   49.48    4.78
   1 -10  -3   13.80    3.65
  -1 -10   3    9.13    3.15
  -1 -10   2   46.61    5.93
   1 -10  -2   28.25    5.65
   1 -10  -2   30.88    6.48
   1 -10  -1   23.83    4.88
  -1 -10   1   33.28    5.20
   1 -10  -1   30.38    5.83
  -1 -10   0   53.76    8.25
   1 -10   0   49.91    8.50
   1 -10   1   65.71   10.53
  -1 -10  -1   76.86   10.40
   1 -10   2   43.98    6.83
  -1 -10  -2   35.81    6.50
  -1 -10  -3  138.82   10.48
   1 -10   3  111.77   11.10
   1 -10   4   19.78    4.23
  -1 -10  -4   21.40    3.18
   1 -10   5    8.45    3.60
   1 -10   6   15.28    3.75
   1 -10   7   23.78    4.05
   1 -10   8    0.25    2.80
   1 -10   9    6.08    2.68
   1 -10  10    1.30    2.35
   1 -11  -9   23.90    2.63
   1 -11  -8    2.38    1.65
   1 -11  -7   48.93    5.15
   1 -11  -6    1.75    2.40
   1 -11  -5   35.88    3.58
  -1 -11   5   11.08    3.13
  -1 -11   4   -1.03    2.35
   1 -11  -4    2.73    3.23
   1 -11  -3  128.60    7.38
  -1 -11   3   36.08    6.58
   1 -11  -2   11.13    3.55
  -1 -11   2    3.75    2.63
  -1 -11   1   38.63    4.75
   1 -11  -1   36.06    5.18
   1 -11   0    3.73    3.28
  -1 -11   0    0.65    2.83
  -1 -11  -1   20.48    4.15
   1 -11   1   24.05    4.80
  -1 -11  -2    1.43    1.73
  -1 -11  -2   -1.33    2.60
   1 -11   2   -1.48    3.20
  -1 -11  -3    3.68    2.50
   1 -11   3    1.98    3.00
   1 -11   4   -0.03    2.90
  -1 -11  -4    1.08    2.15
  -1 -11  -5   68.31    5.68
   1 -11   5   30.96    6.08
   1 -11   6   -0.13    2.53
   1 -11   7    8.73    2.48
   1 -11   8    3.00    1.88
   1 -12  -7    2.08    0.95
   1 -12  -6   22.28    2.48
   1 -12  -5    1.25    1.45
   1 -12  -4   22.58    2.85
   1 -12  -4   31.06    3.15
   1 -12  -3    1.23    1.43
   1 -12  -3    1.33    1.95
   1 -12  -2   53.63    5.73
   1 -12  -1   -1.18    2.35
   1 -12   0   29.80    3.75
   1 -12   1    9.20    2.30
   1 -12   2    0.55    2.08
   1 -12   3    3.25    1.93
   1 -12   4    0.15    1.78
   1 -12   5    1.20    1.50
  -2   0  18   40.46    5.80
  -2   0  17   -1.70    3.98
  -2   0  16   46.76    6.63
  -2   0  15    2.75    4.35
  -2   0  14  132.42   12.53
  -2   0  14  112.77   12.83
  -2   0  13   -0.80    4.20
  -2   0  13    0.85    3.40
  -2   0  12  286.15   30.91
  -2   0  12  361.66   30.86
  -2   0  11    0.30    3.13
  -2   0  11   -1.48    3.13
  -2   0  10 2478.34  208.48
  -2   0  10 2051.89  208.41
  -2   0   9   -0.68    2.13
  -2   0   9   -0.83    2.30
   2   0  -9    3.53    3.98
   2   0  -9   -0.63    2.40
   2   0  -9    0.08    3.13
   2   0  -8 1402.01  148.17
  -2   0   8 1594.09  147.80
  -2   0   8 1696.78  147.80
   2   0  -8 1524.83  148.02
   2   0  -7   -0.13    2.43
  -2   0   7   -0.40    1.45
   2   0  -7   -0.83    2.10
   2   0  -6   58.51    5.80
   2   0  -6   53.28    5.95
   2   0  -5    1.73    1.98
   2   0  -5   -0.25    1.93
   2   0  -4  825.59   76.79
   2   0  -3    3.45    2.73
   2   0  -2  742.32   69.14
   2   0  -1   -0.53    1.50
   2   0   0 1379.96  122.82
  -2   0   0 1427.06  122.80
   2   0   0 1248.58  122.70
   2   0   1    0.03    1.90
  -2   0  -1    1.80    1.55
  -2   0  -2   32.48    3.55
   2   0   2   30.71    4.10
   2   0   3   -1.98    6.30
  -2   0  -3    0.40    1.90
   2   0   3    0.50    2.63
  -2   0  -4    0.98    1.88
   2   0   4    1.53    2.78
   2   0   4    3.38    6.23
   2   0   5    1.38    3.13
   2   0   5    0.40    1.35
   2   0   5    2.75    4.65
   2   0   6   36.83    3.95
   2   0   6   37.96    4.00
   2   0   6   33.48    6.70
   2   0   7    1.00    4.40
   2   0   8  194.31   17.60
   2   0   8  134.80   19.43
   2   0   9   -0.50    2.88
   2   0  10   29.98    4.43
   2   0  10   29.25    3.98
   2   0  11   -1.50    1.93
   2   0  11   -0.73    2.75
   2   0  12    0.20    2.53
   2   0  12    0.90    1.83
   2   0  13   -1.28    2.33
   2   0  14   26.63    3.83
   2   0  15   -1.68    2.30
   2   0  16   22.80    3.15
  -2   1  18    0.05    4.05
  -2   1  17   52.38    6.25
  -2  -1  17   31.06    5.63
  -2  -1  16    6.13    4.10
  -2   1  16    2.38    4.33
  -2   1  15   36.61    5.10
  -2  -1  15   41.81    6.30
  -2   1  15   43.43    6.25
  -2   1  14    4.25    4.63
  -2  -1  14    8.73    4.65
  -2   1  14    4.70    3.40
  -2   1  13  107.14   10.83
  -2  -1  13  112.94   11.25
  -2   1  13   92.27   11.23
  -2  -1  12   46.26    7.25
  -2   1  12   67.04    7.10
  -2   1  12   56.76    7.00
  -2   1  11  311.95   20.08
  -2  -1  11  253.07   20.05
  -2  -1  11  170.63   19.70
  -2   1  11  148.57   19.83
  -2   1  10  196.36   22.75
  -2  -1  10  262.24   22.73
  -2  -1  10  261.74   22.83
  -2   1  10  245.12   22.88
   2  -1  -9  243.34   30.03
  -2   1   9  305.30   29.50
  -2   1   9  340.43   29.53
   2   1  -9  292.52   30.01
  -2  -1   9  326.13   29.48
   2   1  -9  299.68   30.41
   2   1  -9  269.22   29.98
  -2  -1   9  343.43   29.45
   2   1  -8  475.68   41.53
  -2   1   8  474.90   41.06
  -2  -1   8  470.60   40.98
   2   1  -8  488.63   41.83
  -2   1   8  426.30   41.03
  -2  -1   8  436.85   41.01
   2  -1  -8  393.92   41.56
   2  -1  -7    9.08    3.65
   2   1  -7   12.08    3.38
  -2   1   7   17.85    2.33
  -2  -1   7   17.43    2.13
   2  -1  -7   14.03    2.48
   2   1  -7   14.40    3.20
   2  -1  -6  370.44   34.43
   2   1  -6  375.01   34.73
   2  -1  -6  392.84   34.88
   2   1  -6  510.04   35.03
   2   1  -6  431.30   34.98
   2  -1  -5   55.31    5.45
   2   1  -5   68.66    6.33
   2   1  -5   51.88    5.95
   2  -1  -5   53.98    6.25
   2   1  -5   70.11    5.98
   2   1  -4  839.69   70.71
   2  -1  -4  876.65   70.84
   2  -1  -4  848.27   70.36
   2   1  -4  803.76   70.56
  -2   1   3  643.03   60.21
  -2   1   2 1168.75  109.09
  -2  -1   1 1293.29  130.37
   2   1  -1 1366.33  130.40
   2  -1  -1 1627.75  130.55
  -2  -1   0   58.53    7.18
   2  -1   0   64.46    7.58
   2   1   0   83.29    7.80
  -2  -1  -1  181.56   15.05
   2  -1   1  128.92   15.75
  -2   1  -1  136.70   14.90
  -2  -1  -1  183.26   15.38
  -2   1  -2  238.76   23.40
  -2  -1  -2  226.84   23.38
  -2   1  -3  227.56   25.28
  -2  -1  -3  310.08   25.60
   2   1   4  690.72   48.56
   2  -1   4  379.84   47.08
  -2  -1  -4  453.05   46.31
   2   1   4  611.18   46.81
   2   1   5  702.87   48.68
   2   1   5  581.65   49.86
   2   1   5  506.08   47.53
   2  -1   5  351.43   48.53
  -2  -1  -5  511.71   47.93
   2   1   6  633.33   66.21
   2   1   6  854.49   65.71
   2   1   6  673.11   64.54
  -2  -1  -6  650.23   64.99
   2  -1   6  483.43   65.79
   2   1   6  747.18   64.56
   2  -1   6  688.94   64.56
   2   1   7    3.88    3.55
  -2  -1  -7    5.55    2.98
   2   1   7    7.78    4.35
   2  -1   7    0.53    2.45
   2  -1   7    1.93    4.95
   2  -1   7    0.98    1.98
   2   1   7    0.08    1.93
   2   1   7   -0.13    2.13
   2  -1   8  213.36   21.58
   2   1   8  252.14   21.53
   2   1   8  171.33   23.18
   2  -1   8  226.61   21.65
   2  -1   9   21.00    3.88
   2   1   9   27.15    4.63
   2  -1   9   37.93    4.65
   2   1   9   31.96    3.78
   2  -1  10    3.25    2.78
   2   1  10    3.93    3.15
   2   1  10    1.95    2.30
   2  -1  10    9.68    4.38
   2   1  10    6.38    3.50
   2   1  11   10.98    4.00
   2   1  11    9.23    3.10
   2  -1  11    4.43    2.50
   2  -1  12   -1.55    1.98
   2   1  12    2.40    2.23
   2   1  12    0.75    3.33
   2   1  13   25.10    3.55
   2  -1  13   20.05    3.45
   2  -1  14   10.33    2.48
   2   1  14   20.28    3.40
   2   1  15   26.45    3.80
   2  -1  15   23.40    3.45
   2   1  16    4.13    2.30
  -2   2  18    4.93    3.83
  -2   2  17    7.85    4.40
  -2   2  16   19.73    3.68
  -2   2  16   16.13    4.80
  -2   2  15   -1.25    4.35
  -2  -2  15    2.48    4.35
  -2   2  15    0.45    3.38
  -2  -2  14   -6.35    4.45
  -2   2  14    0.83    4.50
  -2   2  14   -0.20    3.63
  -2   2  13    0.75    3.65
  -2  -2  13   -2.13    4.18
  -2   2  13   -1.40    4.35
  -2   2  12    4.40    4.20
  -2  -2  12    4.45    4.20
  -2   2  11  123.12   18.25
  -2  -2  11  291.95   18.55
  -2   2  10  175.20   17.88
  -2  -2  10  198.41   17.93
  -2   2   9  180.53   16.08
   2   2  -9  172.30   16.98
  -2  -2   9  176.53   16.00
  -2  -2   9  178.33   16.08
   2   2  -9  164.05   16.95
   2   2  -8  121.72   11.30
   2  -2  -8   96.49   11.35
  -2   2   8  116.72   10.55
  -2  -2   8  116.94   10.45
  -2   2   8   96.49   10.45
   2   2  -8  133.77   11.60
  -2  -2   8  114.52   10.50
   2   2  -7   73.69    7.83
   2   2  -7   83.29    8.13
  -2   2   7   73.46    7.20
  -2  -2   7   85.84    7.23
   2  -2  -7   64.11    8.18
  -2  -2   7   74.79    7.13
   2   2  -7   89.84    8.18
  -2   2   7   45.13    8.50
  -2   2   7   62.69    7.10
   2  -2  -6  194.28   20.00
   2   2  -6  229.84   19.93
   2   2  -6  315.68   20.40
  -2   2   6  140.55   20.35
   2   2  -6  266.82   20.15
  -2   2   6  189.71   19.35
   2   2  -5  120.35    9.40
   2   2  -5  108.09    9.40
  -2   2   4   30.23    5.68
   2   2  -4   39.31    4.70
  -2  -2   3 5246.88  448.23
  -2   2   3 5169.79  448.70
   2   2  -3 4446.24  448.00
   2  -2  -2    0.98    1.60
   2  -2  -1  229.99   21.70
  -2   2   0   80.14    9.08
   2  -2   0   77.54    7.93
   2   2   0   73.66    7.50
  -2  -2   0   67.54    8.88
  -2   2  -1  254.39   25.55
  -2  -2  -1  296.40   26.08
   2  -2   1  262.34   25.48
  -2  -2  -2  124.00   12.83
  -2   2  -2  124.52   12.70
   2  -2   2  145.27   12.90
  -2   2  -2  104.47   12.20
  -2   2  -3  284.05   29.78
  -2  -2  -3  413.67   30.28
   2  -2   3  349.21   30.33
  -2  -2  -3  366.94   29.96
  -2   2  -3  255.64   29.53
  -2   2  -4  322.03   35.46
  -2  -2  -4  399.39   35.68
  -2   2  -5 1248.58  134.05
   2  -2   5 1483.87  133.60
   2   2   5 1361.28  134.42
  -2   2  -5 1366.23  134.00
   2   2   5 1487.25  133.55
   2  -2   5 1522.38  133.65
   2   2   5 1531.66  135.75
  -2  -2  -5 1622.72  134.25
   2  -2   6   31.51    3.70
  -2  -2  -6   31.11    4.98
   2   2   6   30.11    3.38
   2  -2   6   19.68    5.93
   2   2   6   30.46    6.23
   2   2   6   27.53    5.45
   2  -2   6   30.16    3.65
   2  -2   7  657.66   57.91
   2  -2   7  692.02   57.98
   2   2   7  660.39   57.81
   2   2   7  400.09   58.68
  -2  -2  -7  607.13   58.56
   2   2   7  659.29   59.91
   2  -2   7  324.33   58.86
   2  -2   8    5.23    2.35
   2  -2   8    9.83    3.20
   2  -2   8   10.80    3.65
   2   2   8   11.18    2.43
   2  -2   9  367.51   28.25
   2  -2   9  394.59   28.35
   2   2   9  315.03   27.85
   2  -2  10    0.70    2.45
   2   2  10   -0.33    3.48
   2   2  10    2.08    3.55
   2  -2  10    0.23    4.65
   2  -2  10    3.88    4.73
   2   2  11   62.61    8.80
   2   2  11  120.67    9.18
   2  -2  11   62.26    8.23
   2  -2  11  140.25    9.93
   2   2  12   -0.93    3.38
   2  -2  12    2.63    2.05
   2   2  12    4.18    2.85
   2  -2  13   21.43    3.70
   2   2  13   30.11    4.63
   2   2  14    2.03    2.33
   2   2  14   -0.78    3.08
   2   2  15   31.58    4.23
   2   2  16    7.85    2.48
  -2   3  18    0.53    2.93
  -2   3  17    2.65    2.80
  -2   3  16    2.05    3.30
  -2   3  15    1.65    3.58
  -2   3  14    4.48    3.63
  -2   3  13    1.03    3.90
  -2   3  13   12.60    4.08
  -2  -3  12   52.21    6.20
  -2   3  12   53.73    5.93
  -2   3  11    2.00    3.48
  -2  -3  11    2.43    3.45
  -2   3  11    3.33    4.03
  -2  -3  10  121.55   11.65
  -2  -3  10  128.32   12.10
  -2   3  10  108.09   11.68
  -2   3  10  118.19   11.85
  -2   3   9    1.93    2.85
  -2  -3   9    0.98    3.13
  -2   3   9    1.98    2.55
  -2   3   8  105.47   11.40
  -2  -3   8  141.42   11.58
   2   3  -8  109.72   12.10
   2   3  -8  132.35   12.88
  -2   3   8   87.94   12.88
   2   3  -8  141.47   12.93
  -2  -3   7    5.25    2.08
   2   3  -7    2.18    3.48
   2   3  -7    6.13    3.75
   2   3  -7    3.30    2.73
  -2   3   7    4.63    1.68
   2   3  -6  309.00   31.36
  -2   3   6  325.28   30.93
   2   3  -6  425.00   32.01
  -2   3   6  277.00   30.86
  -2  -3   6  373.01   30.98
   2   3  -6  467.20   32.21
  -2  -3   6  361.16   30.98
   2   3  -5   41.06    5.03
   2   3  -5   29.83    5.33
  -2  -3   5   25.43    4.00
  -2   3   5   46.46    3.95
  -2   3   4 1050.78  108.54
   2   3  -4 1341.27  108.07
  -2  -3   4 1192.82  108.09
   2   3  -4 1062.68  107.74
   2   3  -3   63.91    6.88
  -2   3   3   73.86    9.98
  -2  -3   3   54.18    7.35
  -2  -3   2   36.26    7.50
   2   3  -2   94.79    7.55
  -2   3   1  121.92   10.20
   2  -3  -1   90.07    9.48
   2   3   0  734.07   59.26
   2  -3   0  623.60   59.16
  -2   3   0  783.31   59.38
  -2   3  -1  789.78   70.71
   2   3   1  810.06   70.56
   2  -3   1  836.82   70.71
  -2  -3  -2  587.92   24.68
   2  -3   2  559.04   23.33
  -2   3  -3  252.52   27.58
   2  -3   3  340.06   28.13
  -2   3  -3  252.97   27.58
   2   3   4 2290.61  216.76
  -2   3  -4 2285.36  217.26
   2  -3   4 2146.96  216.89
  -2   3  -4 2155.86  217.26
   2  -3   4 2508.65  216.89
  -2  -3  -4 2644.19  217.66
   2  -3   4 3049.04  218.09
   2  -3   5   60.26    6.38
   2   3   5   60.26    6.08
   2  -3   5   61.19    6.53
  -2  -3  -5   65.09    8.50
  -2   3  -5   66.24    7.40
  -2   3  -6  857.14   77.24
   2   3   6 1305.69   79.96
   2  -3   6  380.14   77.19
   2  -3   6  968.49   76.61
   2  -3   6  763.20   76.56
   2   3   6  870.30   76.44
  -2   3  -6  640.36   76.99
  -2  -3  -6  989.27   77.66
   2  -3   7   11.78    3.18
   2  -3   7   16.10    3.45
   2   3   7   10.78    2.30
   2   3   8  414.12   37.06
   2  -3   8  486.51   37.38
   2   3   9    1.03    3.20
   2  -3   9   -2.05    4.35
   2  -3   9   -0.20    4.08
   2  -3  10   61.99   13.83
   2   3  10  115.62   13.90
   2  -3  11    1.08    4.73
   2   3  11    2.60    3.35
   2   3  12   27.30    4.10
   2   3  13   40.23    5.35
   2   3  14  101.09    7.08
   2   3  14   35.06    6.73
   2   3  15    5.05    2.10
   2   3  15    0.73    2.35
   2   3  16    9.40    2.40
  -2   4  17   -0.60    3.23
  -2   4  17    5.50    2.73
  -2   4  16   12.55    3.78
  -2   4  16   11.25    3.43
  -2   4  15    4.05    3.48
  -2   4  15   14.55    4.13
  -2   4  14   13.40    4.23
  -2   4  14    2.20    3.68
  -2   4  13    9.35    4.15
  -2   4  13    1.03    4.13
  -2   4  12    3.40    3.58
  -2   4  12    2.50    4.28
  -2   4  11    3.90    4.15
  -2   4  11    2.78    3.38
  -2  -4  10  209.66   21.73
  -2   4  10  234.09   21.38
  -2  -4   9   50.06    5.95
  -2   4   9   45.43    5.30
  -2   4   8  213.64   18.58
  -2  -4   8  216.41   18.70
  -2   4   8  171.15   18.40
  -2   4   7  304.38   32.11
   2   4  -7  322.13   32.81
   2   4  -7  418.57   33.81
   2   4  -7  473.95   34.11
  -2   4   7  354.16   32.21
  -2  -4   7  377.24   32.31
  -2   4   6  470.73   44.08
   2   4  -6  456.48   44.66
  -2  -4   6  468.35   44.13
  -2   4   6  417.09   44.01
  -2  -4   6  586.75   44.23
   2   4  -5  430.30   43.11
  -2   4   5  395.14   44.28
   2   4  -5  589.12   43.81
  -2  -4   5  603.00   42.81
  -2   4   5  447.62   42.53
  -2   4   4   63.94   10.15
  -2  -4   4   85.89    6.98
  -2   4   4   60.01    6.58
  -2  -4   4   83.41    6.78
  -2  -4   3  185.46   31.61
  -2   4   3  215.06   33.03
  -2   4   2  907.75   83.86
  -2  -4   2  873.87   84.89
  -2  -4   1  653.46   85.94
  -2   4   1 1036.40   85.26
  -2   4   0 1709.41  155.93
   2   4   0 1646.25  155.88
  -2   4  -1 1039.95  100.54
   2   4   1 1124.71  100.52
   2   4   2  216.39   15.38
   2  -4   2   92.94   15.53
   2   4   2  296.57   16.43
  -2  -4  -2  214.71   18.23
   2  -4   2  232.11   16.65
   2  -4   2  258.24   16.48
  -2   4  -2  268.77   16.55
   2  -4   2   65.39   15.48
  -2   4  -3  540.69   39.93
   2  -4   3  573.02   39.33
   2  -4   3  399.97   39.26
   2   4   3  486.48   39.08
  -2  -4  -3  941.26   42.53
   2  -4   3  164.90   39.16
   2  -4   3  625.38   40.31
   2  -4   4  112.12    7.98
  -2   4  -4  122.37    9.10
   2  -4   4  132.45    9.65
   2   4   5   18.90   10.15
   2   4   5   22.18    2.43
   2  -4   5   16.60    3.40
  -2   4  -5   21.98    5.05
  -2   4  -5   16.33    4.38
  -2  -4  -5   25.35    5.88
   2  -4   5    8.28    5.23
   2  -4   5    3.73    3.08
  -2  -4  -6  235.49   16.70
   2  -4   6  246.07   15.45
   2   4   6  194.16   14.83
   2   4   7  108.62    8.70
   2  -4   7  144.97    9.80
   2  -4   8    2.65    3.58
   2   4   8   12.20    3.53
   2  -4   8   10.60    4.40
   2   4   9  153.68   14.45
   2  -4   9  206.38   14.90
   2   4   9  181.28   14.23
   2   4  10   18.08    4.88
   2  -4  10   10.18    4.58
   2   4  11  102.34    7.98
   2  -4  11   88.44    8.35
   2   4  12   16.55    3.90
   2   4  12    9.88    3.75
   2   4  13   21.65    3.88
   2   4  13   18.68    4.00
   2   4  14    4.38    2.93
   2   4  14    2.88    2.55
   2   4  15   10.70    2.38
  -2   5  17   36.86    3.28
  -2   5  17    7.55    2.83
  -2   5  16    3.15    2.93
  -2   5  16    1.43    2.93
  -2   5  15   55.06    4.80
  -2   5  15   12.30    4.45
  -2   5  14    5.28    3.53
  -2   5  14   -0.40    3.60
  -2   5  13   35.86    5.55
  -2   5  13   41.01    5.28
  -2   5  12    9.13    3.60
  -2   5  11    6.58    3.33
  -2  -5  11    2.78    5.08
  -2   5  10    6.83    3.13
  -2  -5  10    2.05    4.60
  -2   5  10    8.28    3.88
  -2   5   9  611.73   37.86
  -2   5   9  462.63   37.61
  -2   5   8   70.51    6.08
  -2   5   8   57.96    5.58
  -2   5   7  646.28   44.13
  -2   5   7  565.99   43.98
  -2   5   6   40.36    3.78
  -2   5   6   32.46    3.48
  -2  -5   6   45.11    4.48
  -2  -5   5   21.05    9.05
  -2   5   5   53.26   12.10
  -2   5   5  185.71    8.03
   2   5  -5  134.82   11.25
  -2  -5   5   23.83    7.83
  -2  -5   5   71.59    8.28
  -2   5   4  117.84   11.05
  -2  -5   4   82.49   11.20
  -2  -5   4  147.52   11.25
  -2  -5   4  120.30   13.40
   2   5  -4  188.38   13.15
  -2   5   4   50.01   14.20
   2   5  -3   67.11    7.38
  -2  -5   3   60.61    5.73
  -2  -5   3   71.24    8.58
  -2   5   3   53.26    5.55
  -2  -5   2  320.93   31.18
  -2   5   2  411.69   31.91
  -2  -5   2  411.87   34.06
   2   5  -1  332.96   35.51
  -2   5   1  470.18   35.71
  -2  -5   1  398.82   34.96
   2  -5  -1  286.67   35.23
  -2  -5   1  434.90   37.86
  -2  -5   0    4.50    6.35
   2   5   0    4.08    3.50
  -2   5   0    7.13    3.35
   2  -5   0    3.80    2.95
  -2   5  -1  670.31   46.63
   2   5   1  722.65   46.63
   2   5   2    0.75    2.90
   2  -5   2    3.85    3.85
  -2  -5  -2   -3.93    7.45
  -2   5  -2    3.08    3.20
   2  -5   2    0.65    2.40
  -2   5  -3    0.60    3.35
   2  -5   3   -1.10    2.80
  -2  -5  -3    0.50    6.58
   2  -5   3    0.90    1.75
  -2   5  -4   38.58    5.38
   2  -5   4   27.08    4.28
   2  -5   5   12.25    3.38
   2  -5   6   14.73    3.60
   2  -5   7   -3.10    3.53
   2   5   8   22.78    3.90
   2  -5   8   20.03    4.23
   2  -5   9   10.73    4.05
   2   5   9    6.15    3.83
   2   5  10   47.01    5.95
   2  -5  10   53.21    6.38
   2   5  11   10.18    3.55
   2   5  11    9.65    4.15
   2  -5  11   14.23    4.15
   2   5  12   53.36    7.80
   2   5  12   76.61    7.33
   2   5  13   24.25    3.70
   2   5  13   10.43    3.85
   2   5  14    0.53    2.48
   2   5  14    2.05    2.58
   2   5  15    6.40    2.28
   2   5  15    0.58    1.95
  -2   6  16   41.96    4.90
  -2   6  16   41.58    4.60
  -2   6  15   -1.40    2.48
  -2   6  15    1.50    2.93
  -2   6  14  118.59   11.63
  -2   6  13   -0.03    2.73
  -2   6  12  110.89   11.38
  -2   6  12  124.02   11.80
  -2   6  11   -0.68    2.68
  -2  -6  11    2.73    4.38
  -2   6  11    3.00    3.80
  -2   6  10   13.48    3.08
  -2   6  10   11.85    3.90
  -2  -6  10    9.43    4.30
  -2   6   9   61.34    6.15
  -2   6   9   51.11    5.68
  -2   6   8  259.39   24.13
  -2   6   8  296.02   24.25
  -2   6   7   56.63    5.65
  -2   6   7   51.48    5.43
  -2  -6   7   40.56    6.20
  -2  -6   6  320.23   36.06
  -2   6   6  424.40   35.88
  -2   6   5   15.53    2.63
  -2  -6   5   15.70    3.30
  -2  -6   4  786.76   58.26
  -2   6   4  564.62   57.86
  -2  -6   3  236.41   17.45
  -2  -6   3  238.01   14.20
  -2  -6   2   31.93    7.23
  -2  -6   2   33.68    4.05
   2   6  -2   23.95    5.30
   2   6  -1    9.38    4.25
   2   6  -1   15.00    3.98
  -2  -6   1   15.40    7.03
   2  -6  -1    3.75    3.78
   2  -6   0   21.03    7.08
   2   6   0   10.45    3.93
  -2   6   0   12.88    3.83
   2  -6   0    8.80    3.73
   2   6   1    5.25    3.50
  -2   6  -1    1.33    3.65
   2  -6   1    3.65    3.13
   2   6   2   51.73    6.18
   2  -6   2   46.31    5.60
  -2   6  -2   40.11    6.28
   2  -6   3   15.85    3.88
   2  -6   3   14.98    2.70
   2  -6   4    0.78    3.10
   2   6   5    9.38    2.28
   2  -6   5   18.78    3.65
   2   6   6    1.03    2.23
   2  -6   6   -1.35    3.15
   2   6   7   62.69    7.98
   2   6   7   78.31    8.38
   2   6   8   -1.00    3.33
   2  -6   8   -1.28    3.25
   2   6   8    1.28    2.75
   2   6   9    7.18    2.73
   2   6   9    7.13    3.93
   2  -6   9   13.13    3.45
   2   6  10    9.68    2.85
   2   6  10    6.35    3.73
   2  -6  10   12.50    3.53
   2   6  11    0.30    2.53
   2  -6  11   -0.90    2.95
   2   6  12   20.90    3.38
   2   6  13    1.58    2.15
   2   6  13   -0.60    2.78
   2   6  14   32.83    3.98
   2   6  14   39.73    4.30
  -2   7  15   47.98    5.30
  -2   7  14   -0.53    2.63
  -2   7  14   -0.45    1.95
  -2   7  13   37.98    4.28
  -2   7  13   24.65    3.58
  -2   7  12   13.98    2.98
  -2   7  12   24.83    3.78
  -2   7  11   28.00    3.93
  -2   7  11   34.06    4.55
  -2  -7  10   66.76    7.08
  -2   7  10   50.46    6.08
  -2   7  10   67.61    6.58
  -2   7   9    3.70    2.18
  -2   7   9    1.83    3.08
  -2  -7   9    6.70    3.55
  -2   7   8    4.40    3.23
  -2  -7   8    3.93    3.80
  -2   7   7  288.60   25.08
  -2  -7   7  230.61   25.30
  -2   7   6   12.23    2.95
  -2  -7   6   14.53    3.63
  -2  -7   5  236.66   19.73
  -2   7   5  236.34   19.35
  -2  -7   4  247.14   18.98
  -2  -7   4  143.95   18.98
  -2  -7   3   71.34    7.28
  -2  -7   3   47.81    7.65
  -2  -7   2  300.03   25.10
   2  -7  -2  244.37   25.38
  -2  -7   2  241.49   25.03
  -2  -7   1   29.28    3.85
   2  -7  -1   15.40    5.25
   2  -7   0  199.28   19.48
   2  -7   1    7.98    3.75
   2  -7   1    7.93    4.05
   2  -7   2  121.12   16.68
   2  -7   2  233.21   16.95
   2  -7   3   42.61    5.13
   2  -7   3   25.15    5.88
   2   7   4  220.59   22.73
   2  -7   4  165.38   23.20
   2  -7   5    0.98    3.40
   2   7   5    3.35    2.68
   2  -7   5    2.95    4.35
   2   7   6   51.23    6.08
   2  -7   6   39.66    7.25
   2   7   7   21.98    3.73
   2  -7   7   30.11    3.70
   2   7   7   15.70    2.90
   2  -7   7   19.68    4.83
   2   7   8  131.62   11.03
   2  -7   8   86.54   11.55
   2  -7   8  136.90   11.10
   2   7   8   95.52   10.58
   2   7   9   -0.43    1.90
   2   7   9    0.03    2.75
   2  -7   9    2.30    4.43
   2  -7   9   -1.18    2.35
   2   7  10   73.04    7.73
   2  -7  10   77.09    8.08
   2  -7  10   66.94    8.83
   2  -7  11    5.55    4.15
   2   7  11    2.40    2.03
   2   7  11    5.38    2.85
   2   7  12   19.55    2.83
   2   7  12   27.45    3.45
   2   7  13    2.28    1.58
  -2   8  14    4.13    2.10
  -2   8  13   -0.38    2.18
  -2   8  12    4.08    2.45
  -2   8  11    0.38    2.45
  -2   8  10   23.10    3.50
  -2  -8  10   26.13    4.05
  -2   8   9   27.18    3.98
  -2  -8   9   36.91    4.58
  -2   8   8   -0.13    2.35
  -2  -8   8    0.38    2.93
  -2   8   7   19.45    2.98
  -2  -8   7   14.08    3.63
  -2   8   6   -0.93    2.38
  -2  -8   6    3.30    2.88
  -2  -8   5  231.16   19.60
  -2  -8   5  172.15   19.68
  -2  -8   4   20.80    5.00
  -2  -8   4   18.80    3.73
  -2  -8   3  334.76   28.80
   2  -8  -3  414.14   29.10
  -2  -8   2   21.63    3.75
   2  -8  -2   17.45    5.80
  -2  -8   2   33.63    5.18
  -2  -8   1  239.54   25.05
   2  -8  -1  180.56   25.28
   2  -8   0   91.64   11.43
  -2  -8   0  122.62   11.20
   2  -8   0  100.89   11.23
   2  -8   1  120.85   14.58
   2  -8   1  168.93   14.65
   2  -8   2   25.80    3.95
   2  -8   2   24.93    5.45
   2  -8   2   34.46    5.35
   2  -8   3  237.96   31.76
   2  -8   3  451.35   31.93
   2  -8   4    5.68    3.10
   2   8   4    3.50    2.20
   2  -8   4    1.43    4.55
   2  -8   5  179.71   15.83
   2  -8   5  164.50   16.30
   2   8   5  152.38   15.38
   2  -8   6    5.93    2.38
   2  -8   6    4.30    4.00
   2   8   6    6.30    2.25
   2  -8   7   48.98    5.83
   2   8   7   53.11    5.75
   2   8   8    7.10    2.53
   2  -8   8    8.23    4.18
   2  -8   8    5.18    2.18
   2  -8   9  101.04    8.98
   2   8   9   97.04    8.13
   2   8  10    0.35    2.33
   2  -8  10   -1.80    3.45
   2   8  11   82.86    8.40
   2  -8  11   92.64    9.13
   2   8  12    1.38    1.95
   2   8  13   11.15    1.68
   2  -9 -13    1.13    1.33
  -2   9  13    2.23    1.28
  -2   9  12    6.45    1.90
   2  -9 -12    9.60    2.05
  -2   9  11    5.70    2.03
   2  -9 -11    8.28    2.33
  -2   9  10    4.65    2.10
  -2   9   9   13.60    2.55
  -2  -9   9    9.88    2.88
   2  -9  -8    1.28    3.33
  -2   9   8    0.20    2.00
  -2  -9   8    3.63    2.55
   2  -9  -7   16.30    3.95
  -2  -9   7    5.18    2.70
   2  -9  -6    6.68    4.10
  -2  -9   6    2.90    2.55
  -2  -9   5    0.80    2.45
   2  -9  -5   13.83    4.20
  -2  -9   4    1.25    3.90
  -2  -9   4    0.13    2.35
   2  -9  -4    0.20    4.43
  -2  -9   3   11.65    4.00
   2  -9  -3    6.28    4.83
  -2  -9   3    5.88    2.85
  -2  -9   2    8.35    3.20
   2  -9  -2    6.63    4.80
   2  -9  -1    4.18    5.03
  -2  -9   1    3.53    4.13
  -2  -9   1    1.43    3.10
   2  -9  -1    7.05    4.03
   2  -9   0  108.99   14.85
  -2  -9   0  118.52   14.55
   2  -9   0  122.77   14.63
  -2  -9  -1   -0.03    3.75
   2  -9   1    1.28    2.75
   2  -9   1   -2.63    4.33
  -2  -9  -1   -4.10    3.68
   2  -9   1    2.30    3.73
   2  -9   2  282.60   26.30
   2  -9   2  319.68   26.65
   2  -9   2  226.71   26.70
   2  -9   3   10.98    4.60
   2  -9   3   14.38    3.48
   2  -9   4  198.53   22.23
   2  -9   4  251.82   21.98
   2   9   5   46.61    4.73
   2  -9   5   55.33    6.20
   2  -9   5   37.56    4.95
   2  -9   6   50.08    6.15
   2   9   6   61.41    6.05
   2   9   7   -1.18    1.90
   2  -9   7    2.60    3.98
   2  -9   8   95.29    8.28
   2   9   8   66.61    7.13
   2  -9   9    2.05    3.18
   2   9   9    1.58    1.78
   2   9  10   60.74    6.25
   2  -9  10   71.24    7.03
   2   9  11    2.98    1.35
   2 -10 -11    2.28    1.38
   2 -10 -10    4.53    1.73
   2 -10  -9    4.43    2.13
   2 -10  -8   24.28    3.43
   2 -10  -7    8.45    2.95
   2 -10  -6   50.73    5.93
   2 -10  -5   60.79    6.98
   2 -10  -4  174.93   17.03
  -2 -10   3   52.13    6.18
   2 -10  -3   50.48    6.68
   2 -10  -3   48.03    6.03
  -2 -10   2   63.19    5.88
   2 -10  -2   48.61    6.38
   2 -10  -1   21.23    4.88
   2 -10  -1   19.13    5.55
   2 -10   0    3.43    3.25
   2 -10   0    0.40    2.58
  -2 -10   0   -2.28    3.68
   2 -10   0   -2.83    4.08
   2 -10   1   30.66    6.13
   2 -10   1   27.13    5.35
   2 -10   2    8.28    4.25
   2 -10   2    4.20    2.88
  -2 -10  -2   13.78    3.30
   2 -10   3   75.31   10.23
   2 -10   3   65.14    9.63
  -2 -10  -4   24.20    3.33
   2 -10   4   12.45    4.10
   2 -10   5   20.63    4.40
  -2 -10  -5   29.33    3.48
   2 -10   6    2.43    3.38
  -2 -10  -6    2.30    1.80
   2 -10   7    6.28    3.25
   2 -10   8    0.95    2.70
   2 -10   9    4.40    2.38
   2 -11  -9   18.18    2.25
   2 -11  -8    0.13    1.28
   2 -11  -8    0.75    1.65
   2 -11  -7   26.23    3.30
   2 -11  -7   23.90    2.95
   2 -11  -6    0.25    2.38
   2 -11  -6    1.45    1.80
   2 -11  -5   45.28    5.18
   2 -11  -5   41.63    4.73
   2 -11  -4    0.83    2.35
   2 -11  -4    1.13    3.08
   2 -11  -3   49.16    5.65
   2 -11  -3   44.33    5.15
   2 -11  -2    3.53    3.43
   2 -11  -2    1.95    2.28
   2 -11  -2    1.13    2.43
  -2 -11   1   16.33    2.93
   2 -11  -1   14.05    2.73
   2 -11  -1   10.95    3.68
  -2 -11   0    1.05    2.48
   2 -11   0    1.28    3.58
  -2 -11  -1   12.98    2.60
   2 -11   1    5.65    3.73
  -2 -11  -2   17.10    2.63
   2 -11   2   12.20    3.50
   2 -11   3    3.20    2.95
  -2 -11  -3    9.35    2.00
   2 -11   4    1.83    2.70
   2 -11   5    0.55    2.68
   2 -11   6   -0.05    2.35
   2 -11   7    5.00    2.13
   2 -11   8   -0.18    1.53
   2 -12  -7    4.95    1.10
   2 -12  -6    0.63    1.13
   2 -12  -6    2.05    1.35
   2 -12  -5    3.18    1.35
   2 -12  -5    4.63    1.65
   2 -12  -4    8.10    1.70
   2 -12  -4   11.15    2.10
   2 -12  -3    3.93    1.50
   2 -12  -3    4.58    2.08
   2 -12  -2   23.53    3.33
   2 -12  -1    8.78    2.58
   2 -12   0    8.30    2.45
   2 -12   1    4.78    2.15
   2 -12   2    0.90    2.03
   2 -12   3   12.95    2.35
   2 -12   4    1.08    1.73
   2 -12   5   -0.20    1.40
  -3   0  18   52.63    8.18
  -3   0  17   -0.75    5.10
  -3   0  16   15.05    5.80
  -3   0  15   -2.05    5.08
  -3   0  14   86.86   10.08
  -3   0  14   83.24    9.43
  -3   0  13    2.35    4.80
  -3   0  13   -3.10    4.05
  -3   0  12  318.30   42.96
  -3   0  12  737.22   43.46
  -3   0  11    1.63    3.95
  -3   0  11    0.53    3.35
  -3   0  10  603.93   56.13
  -3   0  10  599.20   56.18
  -3   0   9   -0.60    2.38
  -3   0   9   -0.53    2.10
   3   0  -9    1.88    3.40
   3   0  -9    1.03    3.85
  -3   0   8    8.23    2.28
  -3   0   8    8.10    2.03
   3   0  -8    9.25    4.38
   3   0  -8    7.10    3.23
   3   0  -8    8.65    2.45
   3   0  -7   -0.13    2.83
  -3   0   7   -1.10    1.53
  -3   0   7    0.88    1.58
   3   0  -7    0.68    3.70
   3   0  -7   -0.75    2.35
   3   0  -6  701.54   57.16
   3   0  -6  649.63   56.56
   3   0  -6  524.21   56.53
   3   0  -5    0.85    2.25
   3   0  -4  239.22   22.65
   3   0  -4  242.59   23.00
   3   0  -3   -0.48    2.43
   3   0  -2  165.65    7.88
  -3   0   2   53.06    7.00
   3   0  -1   -0.95    2.28
   3   0   0 1518.20  141.10
   3   0   1   -0.13    1.80
  -3   0  -2  202.76   19.75
   3   0   2  230.54   20.03
   3   0   3   -1.25    2.40
  -3   0  -3    0.58    0.98
   3   0   3    1.18    5.95
   3   0   4  232.79   21.70
   3   0   4  279.82   24.50
   3   0   4  276.97   22.43
   3   0   4  250.94   21.70
  -3   0  -4  209.69   21.65
   3   0   5   -0.03    1.45
   3   0   5    0.48    1.60
   3   0   5   -2.38    5.80
  -3   0  -5    0.08    0.40
   3   0   5    0.93    1.53
   3   0   6  171.08   15.95
   3   0   6  160.55   18.78
   3   0   6  170.45   15.98
   3   0   6  166.20   15.93
   3   0   7   -0.33    2.33
   3   0   8  192.68   19.63
   3   0   8  218.66   19.60
   3   0   9    1.73    2.78
   3   0   9   -1.63    3.68
   3   0  10    5.95    3.00
   3   0  10    1.90    2.20
   3   0  11    0.05    2.83
   3   0  11   -0.83    1.80
   3   0  12   64.86    7.03
   3   0  13   -1.58    2.30
   3   0  14   86.94    8.83
   3   0  15    1.03    2.10
  -3   1  18    7.00    5.48
  -3   1  17   20.70    5.88
  -3  -1  17   20.10    5.88
  -3  -1  16   12.35    5.73
  -3   1  16   16.28    3.53
  -3   1  16   10.63    5.50
  -3   1  15   19.58    4.33
  -3   1  15    8.95    5.33
  -3  -1  15    9.65    5.48
  -3  -1  14    2.58    4.78
  -3   1  14   -1.00    4.85
  -3   1  14    2.00    3.85
  -3   1  13    6.98    5.00
  -3  -1  13    7.63    5.13
  -3   1  13    5.43    4.03
  -3  -1  12  136.95   16.88
  -3   1  12  107.29   16.83
  -3   1  11  234.41   27.50
  -3  -1  11  323.48   27.68
  -3   1  11  305.35   27.70
  -3  -1  11  315.85   27.55
  -3   1  10  445.15   44.41
  -3  -1  10  473.83   44.41
  -3  -1  10  513.04   44.38
  -3   1  10  462.93   44.41
  -3  -1   9  332.28   28.28
  -3   1   9  314.88   28.33
   3  -1  -9  238.69   28.90
  -3  -1   9  304.50   28.28
   3   1  -9  243.39   28.73
   3   1  -9  312.28   28.95
  -3  -1   9  315.28   28.25
  -3   1   9  283.40   28.30
   3   1  -9  304.08   29.53
   3  -1  -8  358.09   42.46
  -3   1   8  474.50   42.53
   3   1  -8  420.72   42.88
   3   1  -8  552.64   43.21
   3  -1  -8  438.52   43.11
   3   1  -8  552.87   43.63
  -3  -1   8  501.13   42.51
  -3  -1   8  491.91   42.48
  -3  -1   8  454.25   42.51
   3  -1  -7  311.63   32.91
   3   1  -7  450.60   33.16
  -3   1   7  357.36   32.36
  -3  -1   7  385.26   32.36
   3   1  -7  352.61   33.13
  -3  -1   7  330.38   32.33
   3  -1  -7  329.41   32.36
   3   1  -7  287.90   32.61
   3   1  -6   44.26    5.60
   3   1  -6   39.68    4.93
  -3   1   6   59.43    5.65
  -3   1   6   40.28    4.60
   3  -1  -6   45.46    5.55
   3  -1  -6   50.81    4.65
   3   1  -6   57.78    5.63
   3   1  -5  219.61   16.08
  -3   1   5  173.75   16.18
   3   1  -5  208.26   16.55
   3  -1  -5  147.97   15.85
   3   1  -5  140.52   15.88
   3   1  -4   61.24    6.25
   3   1  -4   63.19    6.35
  -3   1   4   67.11    6.38
   3   1  -3  276.10   24.58
   3   1  -3  247.57   24.15
  -3   1   2  735.55   48.83
   3   1  -2  444.75   47.68
   3  -1  -1   10.43    2.50
   3   1  -1    8.98    3.18
  -3  -1   1    6.48    3.13
   3  -1   0   36.63    3.80
   3  -1   0   49.08    6.13
  -3  -1   0   42.46    4.43
   3  -1   1  206.21   15.10
  -3  -1  -1  172.25   14.98
   3   1   2  254.57   23.63
  -3  -1  -2  274.35   23.60
  -3  -1  -2  260.37   23.50
   3   1   3   -0.55    2.68
  -3  -1  -3    1.48    2.08
  -3  -1  -3    1.68    2.33
   3   1   3   -2.43    8.18
   3   1   4  462.63   34.98
   3   1   4  363.56   34.08
   3   1   4  340.38   34.06
   3  -1   4  372.84   34.13
  -3  -1  -4  416.17   34.46
  -3  -1  -4  368.54   34.51
   3  -1   5  149.35   21.83
  -3  -1  -5  229.79   20.43
   3  -1   5  214.94   20.05
   3   1   5  213.99   20.05
   3  -1   5  220.96   20.03
   3   1   5  203.88   20.03
   3  -1   5  214.59   20.13
  -3  -1  -5  197.33   20.58
   3   1   5  231.21   21.10
   3   1   5  294.12   23.58
   3  -1   6  132.55   13.28
  -3  -1  -6  131.65   13.98
   3   1   6  162.88   14.68
   3   1   6  128.65   13.28
   3  -1   6  151.10   13.43
   3  -1   6  159.35   13.35
   3   1   6  147.00   16.10
   3  -1   7  432.72   43.93
   3  -1   7  488.56   43.98
   3   1   7  458.98   43.96
   3   1   7  512.09   43.98
   3   1   8   65.79    6.58
   3  -1   8   55.81    6.68
   3  -1   9  121.60   15.73
   3   1   9  215.69   15.88
   3  -1  10    0.10    2.20
   3   1  10    1.05    3.68
   3   1  10   -0.05    3.08
   3   1  10   -0.45    2.53
   3   1  11   38.31    4.63
   3   1  11   27.20    3.60
   3  -1  12    0.93    2.00
   3   1  12   -0.83    3.23
   3   1  12    1.05    2.10
   3   1  13   59.06    5.53
   3   1  13   64.89    5.95
   3  -1  14    7.00    2.15
   3   1  14    9.20    2.93
   3   1  15   40.63    4.65
  -3   2  18    1.68    4.83
  -3   2  17   14.00    3.18
  -3   2  17    5.33    5.05
  -3   2  16    4.50    5.03
  -3   2  16    5.78    3.60
  -3  -2  16    1.95    5.58
  -3  -2  15   25.90    6.13
  -3   2  15   28.13    4.78
  -3   2  15   12.55    5.45
  -3   2  14    9.93    4.83
  -3  -2  14   16.93    5.43
  -3   2  14    5.73    4.13
  -3   2  13    3.45    3.88
  -3  -2  13    1.03    4.75
  -3   2  12   10.03    4.23
  -3  -2  12   15.55    4.93
  -3   2  11  197.11   19.48
  -3  -2  11  206.61   19.50
  -3   2  10  145.70   13.85
  -3  -2  10  136.32   13.73
  -3   2   9  262.27   22.23
  -3  -2   9  259.37   22.13
  -3   2   9  220.56   22.10
   3   2  -9  299.40   23.53
   3   2  -9  227.49   22.68
   3   2  -9  269.15   23.55
  -3   2   8  142.57   13.23
  -3  -2   8  139.97   13.13
   3   2  -8  140.17   14.18
  -3   2   8  124.50   13.10
  -3  -2   8  163.00   13.23
   3   2  -8  180.81   14.50
   3   2  -7  817.89   73.51
  -3   2   7  827.86   72.81
   3   2  -7  797.88   73.26
  -3   2   7  431.72   73.24
  -3  -2   7  764.00   72.76
  -3   2   7  739.05   72.76
   3   2  -7 1136.02   74.01
  -3  -2   7  875.92   72.84
   3   2  -6  419.17   35.91
  -3   2   6  226.79   35.71
   3   2  -6  476.10   35.86
  -3   2   6  338.38   35.18
  -3  -2   6  415.99   35.26
   3   2  -6  562.59   36.36
   3   2  -5 2001.76  174.65
   3   2  -5 1743.67  174.78
  -3   2   5 1854.36  175.10
   3  -2  -4  222.71   21.83
   3   2  -4  323.08   22.70
  -3   2   3 3389.52  175.45
   3  -2  -3 1737.79  173.25
   3  -2  -2  267.84   24.58
  -3  -2   2  268.80   24.98
   3   2  -2  240.24   24.88
  -3  -2   1  706.97   71.34
   3  -2  -1  799.98   71.29
   3   2  -1  782.76   71.46
  -3  -2   0 1245.66  122.85
   3  -2   0 1388.76  122.82
  -3  -2  -1  232.76   16.70
   3  -2   1  152.00   15.70
   3  -2   1  261.24   17.13
  -3   2  -1  161.65   15.95
   3  -2   2  746.85   57.53
  -3  -2  -2  621.53   56.93
  -3  -2  -2  713.44   56.96
  -3  -2  -3  397.37   29.33
   3  -2   3  319.45   28.50
  -3  -2  -3  376.64   29.18
   3  -2   4   23.68    2.88
   3   2   4   20.65    2.65
   3   2   4   29.80    4.88
  -3  -2  -4   32.06    4.60
  -3  -2  -4   26.33    4.63
   3   2   5  993.74   96.54
   3   2   5 1202.88   97.67
   3  -2   5 1026.62   96.59
   3  -2   5  987.07   96.57
  -3  -2  -5 1118.69   97.27
  -3  -2  -5 1209.40   97.27
   3  -2   6   35.38    4.23
   3  -2   6   33.73    3.90
   3   2   6   36.16    3.98
   3   2   6   39.16    6.33
   3   2   6   49.73    7.95
  -3  -2  -6   40.13    5.60
   3   2   7  626.43   52.41
   3  -2   7  475.38   52.33
   3  -2   7  607.53   52.43
   3   2   8   26.73    3.78
   3  -2   8   23.48    4.13
   3  -2   8   32.53    4.83
   3  -2   9  195.16   15.45
   3  -2   9  211.96   15.78
   3   2   9  192.53   15.08
   3   2  10    5.78    2.73
   3  -2  10    5.93    2.33
   3  -2  10    9.75    4.98
   3   2  10    3.30    3.45
   3   2  11    1.33    3.45
   3   2  11    1.50    3.13
   3  -2  11    5.13    4.80
   3  -2  11    3.03    1.93
   3   2  12   19.33    4.18
   3  -2  12   17.13    2.95
   3   2  13   21.38    4.65
   3   2  13   50.53    4.78
   3   2  14   23.73    4.23
   3   2  14   39.43    3.98
   3   2  15    7.25    2.23
  -3   3  18    8.30    3.98
  -3   3  17    4.38    3.23
  -3   3  16    5.93    3.95
  -3   3  15    2.58    3.70
  -3   3  14    6.28    4.13
  -3  -3  13   33.43    5.78
  -3   3  13   50.16    5.78
  -3  -3  12  171.23   14.88
  -3   3  12  120.02   14.55
  -3   3  12  157.00   14.83
  -3   3  11   57.01    7.20
  -3  -3  11   70.21    7.13
  -3   3  11   51.01    7.03
  -3   3  10  159.73   15.15
  -3  -3  10  158.50   15.05
  -3   3  10  146.62   15.05
  -3  -3   9   32.26    4.13
  -3   3   9   28.83    4.10
  -3   3   8  243.37   25.55
  -3  -3   8  289.55   25.60
   3   3  -8  325.20   26.83
  -3   3   8  163.78   26.50
  -3  -3   8  328.86   25.80
   3   3  -8  266.57   26.45
   3   3  -8  359.54   27.38
  -3  -3   8  261.54   25.55
  -3   3   7   28.83    3.35
  -3   3   7   26.05    3.43
  -3  -3   7   26.43    3.15
  -3  -3   7   33.33    3.65
  -3  -3   7   28.48    3.20
  -3   3   7   13.63    4.63
   3   3  -7   33.61    5.58
   3   3  -7   28.03    5.03
   3   3  -7   16.80    4.38
  -3   3   6  363.56   37.73
   3   3  -6  553.59   39.16
   3   3  -6  392.19   38.36
   3   3  -6  520.94   38.73
  -3   3   6  344.16   37.71
  -3  -3   6  470.60   37.86
  -3  -3   6  459.15   37.83
  -3   3   5 1191.30  115.22
  -3  -3   5 1170.27  115.32
   3   3  -5 1240.86  115.79
  -3  -3   5 1295.29  115.29
  -3  -3   4 4367.63  399.22
   3   3  -4 3617.11  398.72
  -3   3   3   10.53   10.28
  -3  -3   3   -0.33    3.48
   3   3  -2 1939.42  182.06
   3  -3  -2 1988.83  182.11
  -3  -3   1 1303.14  130.77
   3  -3  -1 1449.64  130.30
   3   3  -1 1401.46  130.10
  -3  -3   0 3145.08  267.22
   3  -3   0 2739.08  266.67
  -3  -3  -1 1002.92   86.81
   3  -3   1  875.30   86.39
   3   3   2 1263.69  123.05
   3  -3   2 1773.02  124.20
  -3   3  -2 1213.08  123.40
  -3  -3  -2 1916.37  124.35
  -3   3  -3    4.05    2.75
   3  -3   3    3.28    2.03
  -3  -3  -3    1.08    4.20
   3  -3   3    4.18    4.35
   3  -3   3    4.95    2.35
   3  -3   4  446.92   41.06
  -3  -3  -4  476.60   40.86
  -3   3  -4  368.26   40.03
   3  -3   4  395.69   39.56
   3  -3   4  446.02   39.71
   3   3   5    7.20    2.05
  -3   3  -5    0.33    3.20
   3  -3   5    6.05    2.55
  -3  -3  -5    1.13    5.63
   3  -3   5   -0.30    4.68
   3  -3   5    8.05    3.08
  -3  -3  -5    9.60    4.45
   3   3   6  485.78   43.91
   3  -3   6  528.54   44.08
  -3  -3  -6  488.71   45.08
   3  -3   6  387.69   43.86
   3  -3   6  510.56   44.11
   3  -3   7    2.23    3.50
   3  -3   7   -0.28    3.50
   3   3   7   -0.68    2.50
   3  -3   8  252.42   20.90
   3  -3   8  206.71   20.88
   3   3   8  204.03   20.48
   3   3   9   22.70    3.60
   3  -3   9   27.78    4.95
   3  -3   9   16.73    5.23
   3   3  10   81.91   13.23
   3  -3  10  110.24   13.53
   3  -3  11    8.28    4.90
   3   3  11   10.20    3.65
   3   3  12    4.78    3.00
   3   3  13    1.23    2.75
   3   3  13    1.93    2.90
   3   3  14   -0.83    2.50
   3   3  14    0.80    2.00
   3   3  15    0.68    1.95
  -3   4  17   10.15    3.20
  -3   4  17   10.88    3.75
  -3   4  16   14.73    4.20
  -3   4  16    7.93    3.65
  -3   4  15   13.73    4.33
  -3   4  15    4.58    3.95
  -3   4  14   41.53    5.08
  -3   4  14    6.73    4.60
  -3   4  13   31.23    4.93
  -3   4  13   24.28    5.05
  -3   4  12   13.45    4.08
  -3   4  12   12.08    4.45
  -3   4  11  151.23   14.90
  -3   4  10  154.93   15.10
  -3   4   9   64.81    7.15
  -3  -4   9   73.16    7.08
  -3   4   9   56.56    6.83
  -3   4   8  181.61   17.20
  -3  -4   8  205.66   17.18
  -3   4   8  158.75   17.08
  -3   4   7  115.62   11.20
  -3  -4   7  142.65   11.48
   3   4  -7  147.40   13.25
   3   4  -7  103.22   12.20
  -3  -4   7  108.77   11.35
  -3   4   7  105.19   11.08
   3   4  -6   95.07    8.80
  -3   4   6   67.34    6.60
  -3   4   6   65.34    6.50
   3   4  -6   64.86    7.73
  -3   4   6  105.97   10.00
  -3  -4   6   51.91    6.88
  -3  -4   5  379.76   77.96
   3   4  -5 1101.11   78.14
  -3  -4   5  361.64   77.19
   3   4  -5 1628.57   79.36
  -3   4   5 1089.31   77.21
  -3   4   5 2018.61   82.16
  -3   4   5 1045.20   77.21
  -3   4   4   35.86    4.00
   3   4  -4   38.31    5.40
  -3  -4   4   47.76    4.20
  -3  -4   3 1855.16  149.95
  -3   4   3 1811.58  153.35
   3   4  -2   44.96    5.33
  -3  -4   2   48.06    4.73
   3  -4  -1  913.40   96.09
   3   4  -1 1181.55   96.19
   3   4   0    0.08    2.30
  -3  -4   0    2.30    4.65
   3  -4   0   -0.28    2.55
   3  -4   0    0.33    2.43
   3   4   1  169.23   17.08
  -3   4  -1  212.26   18.48
   3  -4   1  187.86   17.38
   3  -4   1  169.70   17.13
  -3  -4  -1  181.58   18.90
   3  -4   1  198.58   17.33
   3  -4   1  186.23   17.85
   3  -4   2  243.24   20.83
   3  -4   2  262.09   21.00
   3  -4   2  263.52   21.88
   3  -4   2  178.75   20.75
   3  -4   2  196.03   21.03
  -3   4  -2  252.32   22.03
   3   4   2  221.51   20.75
   3   4   3  289.92   29.20
  -3   4  -3  298.80   30.23
   3  -4   3  387.21   30.63
  -3   4  -3  316.68   29.96
   3  -4   3  367.31   29.33
   3  -4   3  383.99   29.48
   3  -4   3  201.68   29.38
  -3  -4  -3  507.39   31.63
  -3   4  -4   66.66    7.98
   3  -4   4   81.44    8.93
   3  -4   4   92.97    7.35
   3  -4   4   37.86    7.20
  -3  -4  -4  113.19    9.63
   3   4   5    0.68    1.88
   3  -4   5   -0.25    3.18
  -3  -4  -5    1.50    4.65
   3  -4   5    4.03    3.05
   3   4   5    1.20    9.13
   3   4   6    2.75    2.05
   3  -4   6    1.93    3.53
   3  -4   6    0.30    3.30
   3   4   7   16.63    2.80
   3  -4   7   25.85    4.65
   3   4   8   12.25    2.90
   3  -4   8   15.70    4.63
   3  -4   9  137.05    9.75
   3   4   9  100.09    9.08
   3   4  10   27.75    5.95
   3  -4  10   79.54    6.93
   3  -4  10   21.60    5.75
   3   4  10   58.48    6.20
   3   4  11   60.36    5.80
   3  -4  11   40.86    6.00
   3   4  12  161.63   10.90
   3   4  12   68.24   10.45
   3   4  13    3.38    2.83
   3   4  13    1.25    2.93
   3   4  14    6.95    2.33
  -3   5  17    8.28    3.05
  -3   5  17   34.93    3.63
  -3   5  16    6.88    3.20
  -3   5  16    2.50    3.20
  -3   5  15   30.26    5.90
  -3   5  15   61.16    5.85
  -3   5  14    4.75    3.98
  -3   5  14    5.18    3.45
  -3   5  13   22.20    4.25
  -3   5  12    9.60    3.43
  -3   5  11    4.80    3.33
  -3   5  11    4.23    4.00
  -3   5  10  128.95   10.35
  -3   5  10  114.27    9.93
  -3   5   9   31.63    4.05
  -3   5   9   35.03    4.63
  -3   5   8   67.26    6.63
  -3  -5   8   53.11    6.58
  -3   5   8   60.36    6.33
  -3   5   7  204.26   14.93
  -3   5   7  189.06   14.78
  -3   5   6  176.73   14.40
  -3   5   6  183.56   14.35
  -3  -5   5   16.35    5.33
  -3  -5   5   -1.38    6.55
  -3   5   4   93.12    8.75
  -3  -5   4   61.39   10.73
  -3  -5   4   59.13    9.10
   3   5  -4  132.07   11.05
  -3   5   4   60.34   14.05
  -3  -5   4  112.84    8.95
  -3   5   3   42.08    4.50
  -3  -5   3   41.86    7.33
  -3  -5   3   46.66    4.58
   3  -5  -2   22.25    3.85
   3   5  -2   13.88    3.20
  -3  -5   2   10.50    1.98
  -3  -5   2   11.93    5.03
   3   5  -1   32.48    4.60
   3  -5  -1   45.38    4.93
  -3  -5   1   34.63    3.70
   3   5   0   68.49    7.40
   3  -5   0   61.34    7.48
   3   5   0   66.81    6.68
  -3  -5   0   75.16    6.68
   3   5   1    6.58    1.40
   3  -5   1   15.90    5.20
  -3  -5  -1    2.40    5.63
   3  -5   1    5.23    2.83
   3  -5   1    2.00    2.95
  -3   5  -1    9.08    4.23
  -3   5  -2  274.82   22.48
   3   5   2  252.29   21.03
   3  -5   2  232.49   21.33
  -3  -5  -2  343.83   23.93
   3  -5   2  312.43   21.20
  -3   5  -3   17.63    4.43
   3  -5   3   19.50    3.43
   3  -5   3   21.35    2.90
   3   5   3   16.65    2.33
   3   5   4   31.38    3.78
   3  -5   4   61.44    5.03
   3  -5   4   14.55    4.70
   3  -5   4   46.56    5.13
   3  -5   5  166.78   11.00
   3  -5   5   61.56   10.65
   3  -5   6   14.68    4.30
   3  -5   6    5.95    3.65
   3  -5   7    7.23    5.08
   3  -5   7    1.80    3.53
   3   5   8    2.20    3.40
   3  -5   8    3.90    4.78
   3  -5   8    0.95    3.45
   3  -5   9   76.61    7.40
   3   5   9   56.33    6.15
   3  -5  10   -0.53    4.53
   3  -5  10   -0.38    3.53
   3   5  10   -0.88    3.65
   3   5  11  148.70   15.48
   3  -5  11  184.36   16.08
   3  -5  11  164.63   15.70
   3   5  11  145.62   15.30
   3   5  12   17.00    3.40
   3   5  12   10.63    3.88
   3   5  13  102.14   12.58
   3   5  13  160.98   12.68
   3   5  14   11.80    2.40
   3   5  14   10.75    2.45
  -3   6  16   55.61    5.98
  -3   6  16   60.34    6.30
  -3   6  15    2.95    2.45
  -3   6  14   20.70    3.55
  -3   6  13    2.83    2.95
  -3   6  13    3.78    3.65
  -3   6  12   60.86    6.55
  -3   6  12   48.41    6.05
  -3   6  11   35.63    4.93
  -3   6  11   31.76    4.30
  -3   6  10   39.11    4.75
  -3   6  10   31.18    4.08
  -3   6   9   11.83    3.70
  -3  -6   9    8.95    3.73
  -3   6   9   11.70    3.10
  -3   6   8   96.14    8.20
  -3   6   8   91.69    7.95
  -3   6   7    3.23    2.50
  -3   6   7    0.95    2.68
  -3  -6   7    1.35    3.83
  -3   6   6    3.93    2.40
  -3  -6   6    1.43    3.65
  -3   6   5   56.81    5.40
  -3  -6   5   35.71    6.35
  -3   6   4   11.93    2.40
  -3  -6   4   13.53    2.88
  -3  -6   4    7.40    3.60
   3  -6  -3   49.81    6.03
  -3  -6   3   36.13    4.35
  -3  -6   2    4.83    1.98
   3  -6  -2    3.75    4.43
  -3  -6   1    0.50    1.70
   3  -6  -1    2.93    4.10
  -3  -6   0   34.13    3.38
   3  -6   0   12.15    4.95
   3  -6   1   13.88    4.00
   3  -6   1   17.93    3.98
   3  -6   2   37.46    6.35
   3  -6   2   20.70    6.00
   3  -6   3    5.65    4.18
   3  -6   3   12.70    4.20
   3  -6   4    7.28    5.00
   3  -6   4   24.08    4.60
   3  -6   5   14.28    3.95
   3  -6   5    5.85    4.18
   3  -6   6   60.39    5.95
   3  -6   6   24.83    6.00
   3   6   7   21.78    3.48
   3  -6   7   25.88    4.38
   3  -6   7   17.38    5.55
   3   6   8   73.04    7.55
   3  -6   8   83.51    7.80
   3   6   8   70.74    7.23
   3   6   9   84.26    8.78
   3   6   9   95.39    9.25
   3  -6  10  106.52    7.73
   3   6  10   67.69    6.93
   3   6  11    6.08    2.48
   3  -6  11    1.08    4.53
   3  -6  11   11.98    3.48
   3   6  12    5.33    2.38
   3   6  13    7.68    2.43
   3   6  13    3.68    1.85
   3   6  14   13.70    2.13
   3   6  14   18.68    2.33
  -3   7  15   33.93    4.25
  -3   7  14   26.98    3.78
  -3   7  14   46.61    4.50
  -3   7  13   32.11    4.13
  -3   7  13   21.70    3.33
  -3   7  12   36.41    4.68
  -3   7  12   50.71    5.25
  -3   7  11   -0.03    3.03
  -3   7  11   -0.23    2.38
  -3   7  10   31.08    4.33
  -3   7  10   27.10    3.73
  -3   7   9   22.35    3.68
  -3   7   8   39.06    4.83
  -3   7   7   35.46    4.63
  -3   7   6   97.97    8.53
  -3  -7   6   57.61    9.18
  -3   7   5   39.38    4.75
   3  -7  -4  200.71   19.80
   3  -7  -3    7.88    5.23
   3  -7  -2  172.58   17.23
   3  -7  -1   39.03    6.25
   3  -7   0   60.04    7.98
   3  -7   0   74.39    7.98
   3  -7   1   10.70    4.93
   3  -7   1   17.53    4.85
   3  -7   2   82.94   17.88
   3  -7   2  166.13   18.20
   3  -7   3   23.43    3.58
   3  -7   3   13.80    4.30
   3  -7   4   91.27    9.85
   3   7   5   11.98    2.33
   3  -7   5   15.53    4.13
   3   7   6   79.71    7.88
   3   7   6   63.81    7.58
   3   7   7   82.51    8.78
   3   7   7   70.11    8.43
   3   7   8   48.91    5.58
   3   7   8   35.11    4.93
   3   7   9   52.43    5.68
   3   7   9   36.36    5.05
   3   7  10    3.80    1.95
   3   7  10    7.08    2.83
   3  -7  10   10.70    2.88
   3   7  11   33.01    3.98
   3  -7  11   36.18    3.93
   3   7  12    0.90    1.40
   3   7  12    4.48    2.18
  -3   8  14    3.15    1.88
  -3   8  13   24.80    3.43
  -3   8  12    3.95    2.58
  -3   8  11   66.16    6.93
  -3   8  10   -0.48    2.68
  -3   8   9  146.57   14.10
  -3   8   8    1.08    2.45
  -3   8   7   76.04    7.73
  -3   8   6    7.85    2.73
   3  -8  -6   14.80    5.05
   3  -8  -5  252.99   24.43
   3  -8  -4   11.68    5.40
  -3  -8   4   11.80    5.08
  -3  -8   3   42.68    8.78
   3  -8  -3  133.82    9.75
  -3  -8   2    8.60    4.60
   3  -8  -2   26.58    5.83
   3  -8  -1   69.26    8.38
   3  -8   0    1.40    4.38
   3  -8   1  175.70   24.55
   3  -8   1  317.75   24.38
   3  -8   2    6.48    3.08
   3  -8   2    3.08    4.03
   3  -8   3  104.87   12.30
   3  -8   3  131.85   12.80
   3   8   3  138.25   12.10
   3   8   4   -0.43    2.08
   3  -8   4   -1.98    3.45
   3  -8   5   43.56    4.98
   3   8   5   30.43    4.05
   3   8   6    8.15    2.58
   3  -8   6   10.98    3.05
   3  -8   7  100.27    8.18
   3   8   7   64.36    7.73
   3   8   8    2.10    2.28
   3  -8   8    3.60    2.50
   3   8   9   83.14    8.53
   3  -8   9   88.86    8.68
   3   8  10   15.00    2.58
   3  -8  10   12.73    2.60
   3   8  11   40.53    4.30
   3   8  12    4.30    1.53
  -3   9  13    0.58    1.25
   3  -9 -13    1.08    1.35
  -3   9  12    8.03    1.88
   3  -9 -12    9.30    2.05
  -3   9  11    1.83    1.90
   3  -9 -11    3.68    2.23
  -3   9  10   25.55    3.58
   3  -9 -10   38.76    4.05
   3  -9  -9   -1.60    2.98
  -3   9   9    1.18    2.13
   3  -9  -8   13.70    3.73
  -3   9   8   12.05    2.55
   3  -9  -7    7.05    3.78
   3  -9  -6   88.49    9.35
  -3  -9   5   24.78    6.13
   3  -9  -5   79.81    6.68
   3  -9  -4  112.04    7.95
  -3  -9   4   32.23    7.28
   3  -9  -3   46.36    5.68
  -3  -9   3   13.73    5.25
   3  -9  -2  114.02    9.60
  -3  -9   2   61.36    9.45
  -3  -9   1    1.25    4.15
   3  -9  -1   -3.40    4.10
  -3  -9   0  256.12   17.98
   3  -9   0  218.16   17.53
   3  -9   1   25.48    3.65
   3  -9   1   10.20    4.23
   3  -9   2  185.23   24.45
   3  -9   2  322.88   24.40
   3  -9   3    1.05    3.23
   3  -9   4  155.38   15.25
   3   9   5    3.08    1.85
   3  -9   5    2.15    2.73
   3   9   6   66.51    6.73
   3  -9   6   68.26    7.05
   3   9   7    9.20    2.13
   3  -9   7    8.83    2.45
   3   9   8   60.56    5.55
   3  -9   8   46.91    5.73
   3   9   9    2.68    1.50
   3   9  10   29.91    3.20
   3 -10 -11   18.88    2.35
   3 -10 -10   12.93    2.20
   3 -10  -9   26.53    3.35
   3 -10  -8   20.83    3.25
   3 -10  -7   66.41    7.05
   3 -10  -6   22.43    4.00
   3 -10  -5   35.21    4.98
  -3 -10   4    8.60    3.88
   3 -10  -4   22.65    4.48
   3 -10  -4   21.23    4.03
   3 -10  -3    3.38    4.25
   3 -10  -3    4.15    3.45
  -3 -10   3    6.38    3.85
   3 -10  -2   16.53    3.45
   3 -10  -2   22.78    4.93
   3 -10  -2   20.60    4.13
  -3 -10   2   19.90    4.33
   3 -10  -1    2.20    2.68
  -3 -10   1    2.43    4.00
   3 -10  -1   -0.13    4.18
   3 -10  -1    2.63    3.58
   3 -10   0   28.85    5.68
   3 -10   0   19.23    5.08
   3 -10   1   16.00    5.15
   3 -10   1   12.18    3.85
  -3 -10  -2   12.70    3.30
   3 -10   2    1.85    3.90
   3 -10   2    2.38    2.90
   3 -10   3   13.15    4.08
   3 -10   3   12.38    3.48
  -3 -10  -4    8.25    2.75
   3 -10   4    3.53    3.35
   3 -10   4    3.78    2.43
  -3 -10  -5    4.30    2.33
   3 -10   5    5.83    3.30
   3 -10   5    1.53    1.98
   3 -10   6    5.03    3.08
  -3 -10  -6   12.63    2.13
  -3 -10  -7   11.73    1.78
   3 -10   7    4.25    2.78
   3 -10   8    9.38    2.58
   3 -10   9    3.95    1.98
   3 -11 -10   -0.55    0.95
   3 -11 -10    1.18    0.90
   3 -11  -9    2.78    1.35
   3 -11  -9    1.70    1.10
   3 -11  -8   -1.33    1.65
   3 -11  -8    0.75    1.35
   3 -11  -7    0.50    1.98
   3 -11  -7    1.08    1.70
   3 -11  -6    0.13    2.25
   3 -11  -6    0.25    1.93
   3 -11  -5   18.85    3.05
   3 -11  -5   23.05    3.03
   3 -11  -5   20.63    3.48
   3 -11  -4    2.25    2.10
   3 -11  -4    0.50    2.78
   3 -11  -4    1.53    2.48
   3 -11  -3   10.08    2.48
   3 -11  -3   12.85    3.35
   3 -11  -3    8.28    2.88
  -3 -11   2    3.65    2.88
   3 -11  -2    8.23    2.43
   3 -11  -2   10.35    3.28
   3 -11  -2    3.93    2.68
   3 -11  -1   -0.30    2.05
   3 -11  -1    3.05    3.25
   3 -11  -1    0.88    2.35
  -3 -11   1    1.98    2.70
   3 -11   0   -1.48    2.08
   3 -11   0   -1.33    3.45
   3 -11   0   -0.20    2.30
  -3 -11   0    0.28    2.55
   3 -11   1   12.50    3.48
   3 -11   1    5.40    2.28
   3 -11   2    0.35    2.85
  -3 -11  -2    0.23    2.28
   3 -11   3    1.53    2.75
  -3 -11  -3    2.05    2.00
   3 -11   4    2.70    2.58
  -3 -11  -4    5.28    1.78
   3 -11   5    1.45    2.35
   3 -11   6   -0.60    2.00
   3 -11   7    5.63    1.75
   3 -12  -6    0.43    1.05
   3 -12  -6   -0.45    1.28
   3 -12  -5   11.35    1.70
   3 -12  -5   12.45    1.95
   3 -12  -4   -0.23    1.30
   3 -12  -4    0.50    1.68
   3 -12  -3    8.95    1.73
   3 -12  -3   15.63    2.40
   3 -12  -2    1.05    2.10
   3 -12  -1   31.66    3.80
   3 -12   0    2.95    2.08
   3 -12   1    2.58    1.95
   3 -12   2    0.58    1.90
   3 -12   3    1.73    1.83
   3 -12   4   -1.15    1.45
  -4   0  18   30.08    9.63
  -4   0  17   -2.55    7.00
  -4   0  16   35.43    7.48
  -4   0  15   -2.33    4.13
  -4   0  15    1.48    5.88
  -4   0  14   75.59    8.83
  -4   0  14   71.71    9.48
  -4   0  13   -8.10    5.43
  -4   0  13    0.85    4.43
  -4   0  12  126.70   12.73
  -4   0  12  117.94   12.68
  -4   0  11   -1.93    3.75
  -4   0  11    2.53    3.80
  -4   0  10   37.91    4.93
  -4   0  10   35.51    4.90
  -4   0   9    0.98    2.53
   4   0  -9   -3.43    3.58
  -4   0   9   -0.23    2.58
   4   0  -8   32.56    4.85
  -4   0   8   37.36    4.08
   4   0  -8   42.73    6.33
  -4   0   8   34.51    4.05
   4   0  -8   47.03    4.83
  -4   0   8   31.23    3.78
  -4   0   7   -1.25    1.83
  -4   0   7    0.33    1.60
   4   0  -7    1.85    3.63
   4   0  -7    0.63    2.63
  -4   0   7   -0.40    1.93
   4   0  -7    1.70    2.55
  -4   0   6  342.36   30.51
  -4   0   6  311.63   30.51
  -4   0   5   -0.45    1.48
   4   0  -5   -1.40    3.15
   4   0  -4  298.85   28.35
   4   0  -3   -0.15    2.33
   4   0  -2  413.99   38.83
   4   0  -1   -0.28    2.30
   4   0   0 1731.94  161.15
   4   0   1    1.20    5.58
   4   0   2    8.83    1.50
   4   0   3    1.25    1.38
   4   0   3   -0.65    1.40
   4   0   4   92.37   13.53
   4   0   4  111.77   10.45
   4   0   4  108.79   10.43
   4   0   5    0.33    1.63
   4   0   5    0.60    6.03
   4   0   5    0.83    1.93
   4   0   5    0.58    1.75
   4   0   6  299.50   29.60
   4   0   6  336.66   29.68
   4   0   7    0.15    2.83
   4   0   8  342.81   31.53
   4   0   8  325.85   31.51
   4   0   9   -0.33    3.20
   4   0   9    0.98    3.98
   4   0  10  252.19   12.93
   4   0  10  276.42   13.33
   4   0  11    0.80    2.88
   4   0  11    0.50    2.00
   4   0  12  192.58   18.53
   4   0  13   -0.73    2.25
   4   0  14   64.31    6.53
  -4   1  18    7.83    7.40
  -4  -1  17    5.73    8.40
  -4   1  17    7.40    6.35
  -4  -1  16   74.76   10.33
  -4   1  16   70.29    8.10
  -4   1  16   64.46    9.20
  -4  -1  15    8.33    6.23
  -4   1  15    9.38    6.03
  -4   1  15    4.03    4.53
  -4   1  14   47.73    6.88
  -4   1  14   49.56    7.28
  -4  -1  14   54.36    7.93
  -4   1  13   -1.93    5.23
  -4   1  13   -2.53    4.48
  -4  -1  13    0.75    4.28
  -4  -1  13   -3.88    5.53
  -4   1  12   47.71    7.43
  -4  -1  12   73.14    7.90
  -4   1  12   68.74    7.83
  -4  -1  12   61.79    7.40
  -4   1  11   16.10    4.40
  -4  -1  11   16.45    4.00
  -4   1  11   16.13    4.15
  -4  -1  11   13.18    4.35
  -4   1  10   22.68    4.05
  -4  -1  10   24.68    4.05
  -4  -1  10   25.53    4.25
  -4   1  10   23.15    4.18
  -4  -1  10   23.63    3.65
  -4  -1   9   16.43    3.33
  -4  -1   9   18.03    2.93
  -4   1   9   21.30    3.30
  -4  -1   9   20.25    3.23
  -4  -1   8    2.18    2.20
  -4  -1   8    1.90    1.88
  -4  -1   8    0.40    2.08
  -4   1   8    2.50    2.13
   4   1  -8    3.03    2.83
   4   1  -8    0.78    3.75
   4   1  -8    4.28    3.50
  -4  -1   7   -2.33    1.93
  -4  -1   7   -3.60    2.15
   4   1  -7   -6.43    2.88
   4   1  -7   -8.15    4.18
   4   1  -7   -3.78    3.88
  -4  -1   6  503.36   47.56
   4   1  -6  569.95   47.81
  -4  -1   6  540.39   47.58
  -4   1   6  517.29   47.56
  -4  -1   6  387.21   47.58
  -4   1   6  492.96   47.56
  -4  -1   5  101.47    7.73
  -4   1   5  102.19    7.68
   4   1  -4  283.37   26.88
   4  -1  -3    7.13    2.68
  -4   1   3    4.55    3.38
   4   1  -3    2.55    0.70
   4   1  -3    5.98    3.13
  -4   1   2  354.11   34.18
   4  -1  -2  334.46   32.86
   4   1  -2  367.69   33.06
   4  -1  -1  334.26   24.60
   4   1  -1  287.37   24.15
  -4  -1   0   68.31   10.20
   4   1   0  105.72   10.15
  -4  -1   0  102.99   10.40
   4   1   0  178.98   12.03
   4  -1   0  152.75   11.90
   4  -1   0  129.80   10.48
   4   1   1  524.84   41.61
  -4  -1  -1  472.50   41.63
   4  -1   1  414.39   42.33
  -4  -1  -2  104.39    9.15
  -4  -1  -2   88.89    8.93
   4   1   2   99.29    9.20
   4  -1   2   89.31    8.60
   4  -1   3  774.05  102.77
   4   1   3 1227.48  102.04
   4   1   3 1040.77  101.49
  -4  -1  -3 1260.31  101.97
   4   1   3 1053.38  101.47
   4  -1   3 1154.34  101.54
   4   1   3  915.90  103.52
  -4  -1  -3 1184.45  101.77
  -4  -1  -4   45.98    4.78
  -4  -1  -4   44.88    5.33
   4   1   4   42.41    4.50
   4   1   4   50.13    5.80
   4   1   4   40.31    4.40
   4  -1   4   44.61    4.53
   4  -1   4   45.88    4.63
   4  -1   4   41.63    4.43
   4   1   4   41.91    9.05
   4  -1   5 1049.10  102.69
   4   1   5 1118.44  102.74
  -4  -1  -5 1078.93  103.27
   4  -1   5 1178.82  102.74
   4   1   5 1245.93  103.64
   4   1   5 1028.45  102.69
   4  -1   5 1146.92  102.77
  -4  -1  -6   49.58    6.75
   4  -1   6   51.21    5.60
   4   1   6   52.76    5.65
   4  -1   6   54.41    5.88
   4  -1   6   62.54    5.80
   4   1   7  525.54   50.31
   4   1   7  584.82   50.38
   4  -1   7  487.73   50.26
   4  -1   7  550.24   50.41
   4  -1   7  570.15   50.38
   4   1   8  231.19   21.60
   4  -1   8  221.64   21.70
   4   1   9   29.08    3.88
   4  -1   9   28.63    4.85
   4  -1  10   10.90    2.73
   4   1  10   12.03    3.03
   4   1  11  251.09   18.58
   4   1  11  212.16   18.70
   4  -1  12    0.68    2.13
   4   1  12    2.13    3.03
   4   1  12    1.25    2.15
   4  -1  13  122.62   11.78
   4   1  13  119.45   11.98
   4   1  14    2.70    2.13
   4   1  15    8.33    1.70
  -4   2  18    7.13    6.03
  -4   2  17   19.00    6.40
  -4   2  17   37.91    4.93
  -4  -2  16    1.05    8.40
  -4   2  16   -1.08    4.05
  -4   2  16   -5.28    5.75
  -4   2  15    0.05    5.38
  -4   2  15    4.03    4.35
  -4  -2  15    7.08    6.78
  -4  -2  14   28.68    6.60
  -4   2  14   24.38    5.48
  -4   2  13  114.72   16.60
  -4  -2  13  266.54   17.40
  -4  -2  12   18.58    5.48
  -4   2  12   10.10    4.88
  -4  -2  11  350.41   32.73
  -4   2  11  341.08   32.66
  -4  -2  10   22.93    3.78
  -4   2  10   15.63    3.90
  -4   2  10   17.23    3.98
  -4  -2  10   20.60    4.08
  -4   2   9  385.99   35.38
  -4  -2   9  391.02   35.38
  -4  -2   9  404.89   35.43
  -4   2   9  335.93   35.33
  -4  -2   8   53.68    5.23
   4   2  -8   66.54    7.08
  -4  -2   8   49.26    5.28
  -4   2   8   46.53    5.30
   4   2  -8   60.56    7.20
  -4   2   8   37.43    5.20
  -4  -2   8   49.98    5.30
  -4  -2   7  105.72   10.88
  -4   2   7  123.75   11.53
   4   2  -7  114.99   11.35
   4   2  -7  130.40   12.40
   4   2  -7  116.29   11.15
  -4   2   7   97.74   10.85
  -4  -2   7  117.92   10.93
  -4  -2   6  117.77   11.35
   4   2  -6  121.02   11.68
  -4   2   6  105.62   11.28
  -4  -2   6  131.17   11.43
  -4   2   6  134.25   11.73
   4   2  -6  131.67   12.40
   4   2  -6  111.49   11.40
   4   2  -5 1859.26  139.72
  -4   2   5 1500.03  139.40
  -4   2   5 1833.98  139.65
   4   2  -5 1338.40  139.40
  -4   2   5 1418.74  139.40
  -4   2   5 1615.85  140.45
   4  -2  -5 1397.13  139.37
  -4  -2   5 1533.51  139.50
  -4  -2   5 1623.57  139.52
  -4   2   4   87.86   10.05
  -4   2   4  116.02   11.70
  -4   2   4  116.69   10.15
  -4  -2   4  112.07   10.23
   4   2  -4  120.40   11.00
   4  -2  -4  113.37   10.25
   4  -2  -3  903.75   86.09
  -4   2   3 1140.49   87.81
   4   2  -3  894.10   86.34
  -4  -2   2  293.55   24.40
   4   2  -2  356.93   24.70
   4  -2  -2  333.88   24.23
  -4   2   1  216.74   22.38
  -4  -2   1  267.64   23.08
   4  -2  -1  223.51   22.60
   4   2  -1  299.25   23.40
   4  -2  -1  300.23   23.15
  -4  -2   0   97.32    8.95
   4  -2   0   77.34    8.25
  -4   2   0   78.56    8.30
   4  -2   1  649.23   45.83
  -4   2  -1  440.72   44.73
  -4  -2  -1  502.58   45.06
   4   2   1  417.59   44.48
   4  -2   1  536.61   44.61
   4  -2   1  451.43   44.66
   4  -2   1  557.19   44.61
  -4  -2  -2    3.88    6.38
   4   2   2    2.33    1.30
   4  -2   2    1.90    1.80
  -4  -2  -2    2.35    2.50
   4  -2   2    9.08    4.53
  -4  -2  -3  194.93   16.68
   4   2   3  201.46   16.88
   4  -2   3  164.63   15.95
   4   2   3  158.03   15.90
   4  -2   3  186.18   16.10
   4   2   4  342.51   27.78
   4  -2   4  286.12   26.70
  -4  -2  -4  354.46   27.78
   4   2   4  267.97   26.65
   4  -2   4  308.53   26.83
  -4  -2  -4  314.00   27.33
   4   2   4  334.31   30.86
   4  -2   5  158.13   16.43
   4   2   5  187.51   17.70
   4  -2   5  177.58   16.48
  -4  -2  -5  182.98   17.50
   4  -2   5  177.18   16.58
   4   2   6  540.24   49.53
   4  -2   6  506.86   49.51
   4  -2   6  543.79   49.63
   4  -2   6  539.97   49.56
   4  -2   7   92.97    9.75
   4  -2   7  100.12    9.85
   4   2   7  102.67    9.85
   4   2   8  164.75   15.70
   4  -2   8  159.00   15.68
   4   2   9   44.43    4.70
   4  -2   9   29.05    4.05
   4   2  10    1.28    2.53
   4   2  10    4.63    3.55
   4  -2  10    3.93    2.23
   4  -2  11   -1.30    1.93
   4   2  11   -1.93    3.35
   4   2  11   -2.25    3.00
   4   2  12   22.75    4.43
   4   2  12   39.41    4.28
   4   2  13    2.78    2.50
   4   2  13    3.78    2.35
   4   2  14    4.83    2.18
   4   2  15   -0.35    1.48
  -4   3  17    1.28    3.43
  -4   3  16   15.28    4.40
  -4   3  15    2.18    4.15
  -4   3  14   20.98    5.68
  -4  -3  14   34.83    7.93
  -4  -3  13    3.90    5.60
  -4   3  13    1.05    4.05
  -4   3  13   -3.73    4.20
  -4  -3  12  579.12   47.66
  -4   3  12  496.96   47.43
  -4   3  12  458.88   47.36
  -4  -3  11   12.28    4.65
  -4   3  11   13.83    4.03
  -4   3  11   14.58    4.65
  -4   3  10  402.59   39.26
  -4  -3  10  463.38   39.36
  -4   3  10  396.79   39.21
  -4   3   9   18.55    3.65
  -4  -3   9   24.90    4.15
  -4  -3   9   22.85    4.05
  -4  -3   8  286.85   24.48
  -4  -3   8  275.62   24.40
  -4   3   8  227.96   24.28
   4   3  -7   73.91    7.65
  -4   3   7   48.63    5.58
   4   3  -7   53.88    6.75
  -4  -3   7   54.43    5.95
  -4   3   7   47.41    5.53
  -4  -3   7   49.91    5.73
   4   3  -7   66.01    6.85
  -4  -3   7   62.11    5.85
  -4  -3   6  426.42   34.76
  -4   3   6  377.24   34.46
   4   3  -6  556.79   35.51
  -4   3   6  229.21   34.83
  -4  -3   6  231.51   34.51
   4   3  -6  421.37   35.41
  -4   3   6  398.22   34.48
  -4  -3   6  482.86   34.63
  -4   3   5  124.32    9.83
  -4   3   5  130.25    9.90
   4   3  -5  137.12   11.13
  -4  -3   4 1853.56  145.87
  -4   3   4 1643.23  145.80
   4  -3  -4 1427.86  145.72
  -4   3   4 1479.85  145.75
  -4   3   3    9.55   12.93
  -4  -3   3    2.55    1.95
  -4   3   3    1.03    1.60
  -4  -3   3    1.90    3.78
   4   3  -3    4.43    3.75
   4  -3  -3    3.15    1.93
  -4  -3   2 1787.30  153.75
  -4  -3   2 1763.27  152.85
   4  -3  -2 1591.57  152.83
   4   3  -2 1653.48  153.53
   4  -3  -2 1483.77  153.03
  -4  -3   1   96.37    9.10
  -4  -3   1  100.57   10.40
   4  -3  -1   95.69    9.23
   4  -3  -1   85.49    9.63
  -4  -3   0  987.79   78.41
   4  -3   0  910.48   78.99
  -4  -3   0 1006.39   79.31
  -4   3   0  737.07   78.54
   4  -3   0  867.62   78.41
   4  -3   0  742.70   78.34
   4  -3   1    1.75    1.68
  -4   3  -1    1.58    2.20
   4  -3   1    3.15    1.68
   4  -3   1    1.40    0.88
  -4  -3  -1    3.80    3.48
   4  -3   1    3.48    2.38
   4  -3   1    2.13    3.55
  -4  -3  -2 1146.99   85.76
  -4   3  -2  722.40   84.84
   4  -3   2  826.04   84.59
   4  -3   2  923.40   84.69
   4  -3   2 1108.44   84.74
   4  -3   2 1019.30   85.76
   4   3   3  159.43   16.18
  -4  -3  -3  219.16   17.53
  -4   3  -3  134.90   16.58
   4  -3   3  173.40   16.28
   4  -3   3  205.26   16.48
   4  -3   3  221.19   18.35
   4   3   4  204.43   18.60
   4  -3   4  172.30   17.30
  -4  -3  -4  205.78   18.30
   4   3   4  185.23   22.55
   4  -3   5   32.91    4.28
   4   3   5   34.51    4.03
   4   3   6   51.83    5.53
   4  -3   6   51.03    5.73
   4  -3   6   45.91    5.40
   4  -3   7   11.20    3.45
   4   3   7    9.38    3.03
   4  -3   7    5.30    2.68
   4   3   8    1.18    3.00
   4  -3   8    2.68    3.60
   4  -3   8    5.10    4.55
   4   3   9    0.03    2.70
   4  -3   9    1.40    3.63
   4  -3   9    1.98    4.60
   4  -3  10   22.15    5.33
   4   3  11   41.83    6.85
   4  -3  11  102.54    8.18
   4   3  12    0.28    3.20
   4   3  12    0.23    2.63
   4   3  13   -0.33    2.58
   4   3  13    0.73    2.33
   4   3  14    2.30    2.15
   4   3  14    0.25    1.53
   4   3  15    1.18    1.43
  -4   4  17   30.81    4.70
  -4   4  17   18.25    3.93
  -4   4  16   15.83    4.35
  -4   4  16    8.28    3.83
  -4   4  15   21.45    5.73
  -4   4  15   62.24    6.20
  -4   4  14    3.40    4.30
  -4   4  14    0.10    4.30
  -4   4  13   20.10    4.90
  -4   4  13   27.55    5.28
  -4   4  12  154.30   14.35
  -4   4  12  131.32   14.20
  -4   4  11  131.82   13.18
  -4   4  10   63.51    7.15
  -4   4   9  117.12   11.48
  -4   4   9  115.02   11.43
  -4   4   8    1.40    2.55
  -4  -4   8   -1.23    3.53
  -4   4   8   -0.68    2.90
  -4   4   7  226.91   17.48
  -4   4   7  236.59   17.48
  -4   4   6  744.45   62.81
  -4   4   6  798.91   62.84
  -4   4   5  277.02   25.00
  -4   4   5  249.47   24.95
   4   4  -5  277.47   25.95
  -4  -4   5  216.39   25.15
  -4  -4   5  296.82   25.05
  -4   4   4  351.91   34.46
   4   4  -4  354.21   35.26
  -4   4   4  399.64   34.58
  -4  -4   4  403.34   34.53
  -4   4   3  433.47   31.83
   4  -4  -3  346.23   24.58
   4   4  -3  207.51   24.18
  -4   4   3  252.17   24.25
  -4  -4   3  319.28   24.35
  -4   4   2  231.99   22.98
   4  -4  -2  287.17   23.18
  -4  -4   2  257.22   23.00
   4  -4  -2  227.34   23.20
   4   4  -1  259.72   24.60
  -4  -4   1  227.79   25.85
  -4  -4   1  272.80   24.68
   4  -4  -1  302.13   24.88
   4  -4  -1  220.84   25.00
   4  -4   0   91.17   11.40
   4   4   0  109.19   10.60
  -4  -4   0  146.10   12.75
  -4  -4   0  132.72   10.68
   4  -4   0  107.17   10.80
   4  -4   0  118.22   10.98
   4  -4   0   95.89   10.65
   4  -4   1  261.97   25.58
   4   4   1  252.24   25.50
   4  -4   1  283.57   25.65
  -4   4  -1  248.62   25.98
   4  -4   1  292.65   26.50
  -4  -4  -1  295.42   25.53
   4   4   2  189.08   18.53
  -4   4  -2  171.30   19.05
   4  -4   2  199.21   18.68
  -4  -4  -2  259.37   20.48
   4  -4   2  212.91   18.70
   4  -4   2  200.91   19.85
   4   4   3  107.32   10.85
  -4   4  -3   98.14   11.58
   4  -4   3  127.00   11.15
   4  -4   4  181.83   17.33
   4  -4   5   61.36    7.00
   4  -4   5   55.46    6.50
   4   4   6   28.50    3.50
   4  -4   6   39.51    4.68
   4  -4   6   26.50    4.78
   4   4   7    1.20    2.58
   4  -4   7    3.15    4.00
   4  -4   7    0.85    4.00
   4   4   8   60.14    6.10
   4  -4   8   69.64    6.83
   4   4   9    1.23    3.60
   4  -4   9    0.08    3.85
   4  -4   9   -3.15    4.10
   4   4  10   22.73    4.38
   4   4  10   13.10    4.48
   4  -4  10   25.78    4.73
   4   4  11    1.03    4.00
   4   4  11    2.88    3.73
   4  -4  11    0.65    4.15
   4   4  12    7.25    3.60
   4   4  12   43.73    4.18
   4   4  13   -0.30    2.38
   4   4  14    4.13    1.65
  -4   5  17    5.63    2.95
  -4   5  17   30.53    3.90
  -4   5  16    9.35    3.38
  -4   5  16    5.88    3.30
  -4   5  15   11.90    3.75
  -4   5  15   10.73    4.18
  -4   5  14   13.13    3.80
  -4   5  14   14.03    4.50
  -4   5  13    6.25    3.60
  -4   5  12   -0.73    3.45
  -4   5  11    6.48    3.93
  -4   5  11    5.60    3.48
  -4   5  10    7.48    3.58
  -4   5  10   14.03    3.90
  -4   5   9    3.63    3.48
  -4   5   9   -0.08    3.10
  -4   5   8   22.95    3.85
  -4   5   8   19.58    3.65
  -4   5   7   39.03    4.55
  -4   5   7   40.96    4.63
  -4   5   6    6.53    2.73
  -4  -5   6    7.40    3.25
  -4   5   6    7.18    2.53
  -4  -5   6    3.95    3.73
  -4   5   5   28.98    3.70
  -4  -5   5   31.88    4.73
  -4  -5   5   30.71    4.08
  -4  -5   4   14.08    2.63
  -4   5   4   14.68    2.70
  -4   5   3    0.58    2.08
  -4   5   3   -7.28   14.05
  -4  -5   3    0.75    1.88
  -4  -5   2  119.17   11.35
   4   5  -1   88.61    8.45
  -4  -5   1   88.76    8.50
   4   5   0  265.99   26.28
   4  -5   0  306.90   26.58
  -4  -5   0  290.00   26.30
   4  -5   0  278.57   26.38
   4   5   1  623.48   63.86
   4  -5   1  613.58   64.59
   4  -5   1  752.40   64.09
   4  -5   1  817.09   64.26
   4  -5   1  710.12   63.99
   4   5   2  148.70   15.93
   4  -5   2  185.41   16.33
   4  -5   2  196.93   16.65
   4  -5   2  184.73   16.18
   4   5   3  230.49   23.73
   4  -5   3  170.33   24.03
   4   5   4    2.13    2.00
   4  -5   4    4.13    3.38
   4  -5   4   -1.43    4.00
   4  -5   5  254.79   13.70
   4  -5   5   51.01   13.33
   4  -5   6    2.30    4.50
   4  -5   6    0.83    3.80
   4  -5   7  234.11   11.88
   4  -5   7   47.28   10.98
   4   5   8    6.80    3.53
   4  -5   8    9.05    4.15
   4  -5   8    2.50    3.55
   4  -5   9  152.53   11.03
   4   5   9  127.67   10.58
   4   5  10   61.59    6.55
   4  -5  10   67.81    6.83
   4   5  10   56.41    6.28
   4   5  11  134.57   11.03
   4   5  11  119.80   10.80
   4   5  12    4.25    2.58
   4   5  12    1.50    2.93
   4   5  13   57.18    5.68
   4   5  13   50.71    5.65
   4   5  14    0.25    1.30
  -4   6  16   13.80    3.10
  -4   6  16    9.48    3.00
  -4   6  15    0.98    2.70
  -4   6  14    7.85    3.08
  -4   6  13   21.70    3.95
  -4   6  13   29.00    4.60
  -4   6  12   19.18    4.20
  -4   6  12   11.18    3.33
  -4   6  11   14.93    3.93
  -4   6  11   14.80    3.30
  -4   6  10   11.68    3.25
  -4   6  10   12.35    3.75
  -4   6   9   15.23    3.45
  -4   6   9   14.03    3.78
  -4   6   8   14.25    3.53
  -4   6   8   17.80    3.70
  -4   6   7    9.15    3.20
  -4  -6   7   11.83    4.48
  -4  -6   6   31.46    4.70
  -4   6   6   23.00    3.93
  -4  -6   6   32.03    5.35
  -4  -6   5   24.68    4.15
  -4   6   5   23.73    3.80
  -4  -6   5   27.30    5.08
  -4   6   4   68.49    7.65
  -4  -6   4   88.01    8.38
  -4  -6   4   75.14    7.73
  -4  -6   3   15.38    2.88
   4  -6  -2   98.42    9.05
  -4  -6   2   76.24    8.00
   4  -6  -1   55.83    6.40
  -4  -6   1   40.93    4.58
   4  -6   0  673.29   55.81
   4  -6   0  642.86   55.88
  -4  -6   0  559.77   55.43
   4  -6   0  590.65   55.58
   4  -6   1    6.78    3.08
   4  -6   1    6.83    3.75
   4  -6   1    6.45    4.08
   4  -6   2  188.28   14.05
   4  -6   2  183.73   13.75
   4  -6   3    4.83    4.03
   4  -6   3    7.90    4.50
   4  -6   3    2.30    4.00
   4  -6   4   79.81    6.93
   4  -6   4   28.48    6.58
   4  -6   5   55.03    5.88
   4  -6   5   19.88    5.40
   4  -6   6   33.81    5.00
   4  -6   6   10.73    4.03
   4   6   7   24.98    3.45
   4  -6   7   27.48    5.05
   4  -6   8   33.56    5.03
   4   6   8   26.88    3.65
   4   6   9    7.38    2.93
   4   6   9   12.13    3.83
   4  -6   9   10.70    4.20
   4  -6   9    8.40    3.33
   4   6  10   95.02    9.50
   4  -6  10   80.96    9.83
   4   6  11    0.03    2.10
   4  -6  11   -0.05    2.93
   4   6  12   91.44    7.63
   4   6  12   64.64    7.30
   4   6  13    3.38    1.33
   4   6  13    3.68    1.65
  -4   7  15    9.63    2.55
   4  -7 -15    7.40    2.28
  -4   7  14   31.26    4.25
  -4   7  13    1.88    3.23
  -4   7  13    1.68    2.35
  -4   7  12   90.52    7.93
  -4   7  12   62.96    7.33
  -4   7  11    2.55    2.50
  -4   7  11    3.25    3.40
  -4   7  10   57.18    6.50
  -4   7   9    1.63    3.00
  -4   7   8    5.98    3.05
  -4   7   7   19.68    3.88
  -4  -7   7   25.03    4.85
  -4   7   6  132.62   13.58
  -4  -7   6  153.45   14.23
   4  -7  -5   25.63    5.70
  -4   7   5   22.75    3.85
  -4  -7   5   20.70    5.60
   4  -7  -4  204.36   17.60
  -4  -7   4  152.18   17.33
   4  -7  -3   52.61    7.35
   4  -7  -2  281.72   27.08
   4  -7  -1   98.39   10.78
   4  -7   0  104.84   10.30
   4  -7   0  116.37   10.93
   4  -7   0   83.19   10.93
   4  -7   1  141.55   11.90
   4  -7   1  149.00   11.45
   4  -7   2   39.63    5.65
   4  -7   2   46.56    5.03
   4  -7   3   73.54    7.63
   4  -7   3  101.89    7.80
   4  -7   4    2.48    4.25
   4  -7   4   -1.15    3.83
   4  -7   5   22.73    4.93
   4   7   5   30.56    3.60
   4   7   6   12.25    2.28
   4  -7   6   14.60    4.45
   4  -7   6    8.75    3.50
   4  -7   7   69.99    7.00
   4  -7   7   41.33    6.10
   4   7   7   50.28    5.60
   4   7   7   62.99    6.05
   4   7   8   16.53    3.38
   4   7   8   13.10    2.58
   4  -7   8   20.58    4.48
   4  -7   8   14.00    3.58
   4   7   9  139.65   11.20
   4  -7   9  124.40   11.50
   4  -7   9  130.10   11.38
   4   7  10   25.98    3.23
   4  -7  10   18.48    3.98
   4  -7  10   23.18    3.55
   4   7  10   16.33    2.55
   4   7  11   26.55    3.10
   4   7  11   17.78    2.48
  -4   8  14   10.60    2.20
   4  -8 -14   13.15    2.10
  -4   8  13   57.78    7.00
   4  -8 -13   79.41    6.90
  -4   8  12    8.60    2.65
  -4   8  11   44.18    5.10
  -4   8  10   39.18    4.73
  -4   8   9   57.91    6.83
   4  -8  -9   77.66    7.38
   4  -8  -8    1.70    3.90
  -4   8   8    1.75    2.68
   4  -8  -7  268.04   19.60
  -4   8   7  172.70   19.03
   4  -8  -6   37.33    5.55
  -4  -8   6   24.38    5.08
   4  -8  -5  266.82   21.43
  -4  -8   5  176.95   21.28
   4  -8  -4    7.65    4.85
   4  -8  -3  143.35   14.80
   4  -8  -2   -0.05    5.08
   4  -8  -1   22.38    4.35
   4  -8  -1   21.63    5.35
   4  -8  -1   29.30    5.43
   4  -8   0    1.03    3.48
   4  -8   0    0.13    4.50
   4  -8   0    3.00    4.90
   4  -8   1  118.69   10.78
   4  -8   1  122.75   10.03
   4  -8   2   17.05    3.63
   4  -8   2   15.20    4.80
   4  -8   2    5.43    4.08
   4  -8   3    8.63    4.55
   4  -8   3    6.88    3.90
   4   8   4    0.18    2.05
   4  -8   4    0.38    4.05
   4  -8   4   -4.28    3.50
   4   8   5    5.98    2.33
   4  -8   5    8.30    4.10
   4  -8   5    1.43    3.10
   4   8   6   16.33    2.75
   4  -8   6   11.90    4.40
   4  -8   6   14.40    3.45
   4   8   7   47.28    4.68
   4  -8   7   39.98    5.13
   4   8   8   45.93    4.50
   4  -8   8   40.38    5.03
   4   8   9   16.00    2.50
   4  -8   9    7.15    3.20
   4  -8   9   10.35    2.68
   4  -8  10    7.40    3.10
   4  -8  10    9.73    2.43
   4   8  11   -0.13    1.30
   4  -9 -13    8.03    1.60
   4  -9 -12   38.46    3.80
   4  -9 -12   41.86    3.75
   4  -9 -11    8.33    2.18
  -4   9  11    6.18    1.95
  -4   9  10   77.39    8.90
   4  -9 -10  116.57    9.15
  -4   9   9    4.38    2.15
   4  -9  -9    9.40    2.95
   4  -9  -8  245.34   23.30
   4  -9  -7   14.93    3.93
   4  -9  -6  215.04   20.68
   4  -9  -5   80.31    8.93
   4  -9  -4   50.46    6.55
   4  -9  -3    6.43    4.50
   4  -9  -3    9.10    4.33
  -4  -9   3    3.08    4.40
   4  -9  -2   36.53    5.73
   4  -9  -2   44.21    5.43
   4  -9  -2   34.03    4.50
   4  -9  -1   37.96    5.43
   4  -9  -1   34.81    5.38
   4  -9  -1   34.71    4.48
  -4  -9   0  192.71   19.23
   4  -9   0  248.72   19.45
   4  -9   0  245.37   18.93
   4  -9   1   73.79    7.25
   4  -9   1   73.96    6.40
   4  -9   2  170.35   15.08
   4  -9   2  257.47   15.13
   4  -9   3   16.90    4.20
   4  -9   3    6.68    3.53
   4  -9   4    5.18    3.90
   4  -9   4    2.58    3.03
   4   9   5    6.53    1.80
   4  -9   5    2.45    3.73
   4  -9   5    3.68    2.88
   4   9   6    9.45    1.98
   4  -9   6    6.65    3.65
   4  -9   6    6.95    2.58
   4   9   7   13.08    2.05
   4  -9   7    6.90    3.33
   4  -9   7    7.95    2.63
   4   9   8    1.08    1.48
   4  -9   8    0.50    2.63
   4  -9   8   -0.08    1.85
   4   9   9    1.90    1.20
   4  -9   9   -0.40    2.33
   4 -10 -11   53.33    5.45
   4 -10 -11   58.08    5.45
   4 -10 -10   -0.65    1.53
   4 -10 -10    0.88    1.70
   4 -10  -9   34.61    3.98
   4 -10  -8   11.70    2.70
   4 -10  -7   48.78    5.50
   4 -10  -6   21.58    3.75
   4 -10  -5   23.38    3.60
   4 -10  -5   22.63    3.90
   4 -10  -4   11.00    2.98
   4 -10  -4    9.80    3.45
  -4 -10   4    3.60    3.48
   4 -10  -3    6.30    2.90
   4 -10  -3    5.00    3.38
  -4 -10   3    2.35    3.68
   4 -10  -2    9.20    3.03
   4 -10  -2   13.03    3.73
  -4 -10   2    6.20    4.03
   4 -10  -1    2.60    2.83
   4 -10  -1   -3.10    3.68
  -4 -10   1    3.45    4.13
   4 -10   0   25.15    4.93
   4 -10   0   40.06    4.75
  -4 -10  -1    1.20    3.60
   4 -10   1    2.35    3.50
   4 -10   1    2.90    3.15
  -4 -10  -2   21.30    3.73
   4 -10   2    9.35    3.28
   4 -10   3    6.58    3.15
  -4 -10  -3   35.78    3.63
  -4 -10  -4   40.68    3.58
   4 -10   4   11.70    3.23
  -4 -10  -5    5.55    2.15
   4 -10   5    0.70    1.83
  -4 -10  -6   45.41    3.23
   4 -10   6   13.50    3.03
  -4 -10  -7    5.60    1.40
   4 -10   8   20.58    2.83
   4 -11  -9    8.63    1.45
   4 -11  -9    8.05    1.35
   4 -11  -8    1.75    1.33
   4 -11  -7    3.53    1.70
   4 -11  -7    2.85    1.60
   4 -11  -6    0.60    1.73
   4 -11  -6    0.60    1.83
   4 -11  -5    7.98    2.08
   4 -11  -5    6.23    2.20
   4 -11  -4    3.53    2.18
   4 -11  -4    6.83    2.43
   4 -11  -3   16.78    2.83
   4 -11  -3   22.88    3.20
   4 -11  -2    7.15    2.18
  -4 -11   2    7.90    2.80
   4 -11  -2    6.20    2.45
   4 -11  -1   35.73    4.45
   4 -11  -1   39.73    4.40
  -4 -11   1   40.83    4.75
   4 -11   0    2.45    2.23
  -4 -11   0    1.28    2.63
   4 -11   1   12.15    2.55
  -4 -11  -1   17.33    2.90
  -4 -11  -2    4.85    2.30
   4 -11   2    3.45    1.75
  -4 -11  -3    2.13    2.03
  -4 -11  -4    3.68    1.68
   4 -12  -5    4.70    1.25
   4 -12  -4    3.65    1.33
  -5   0  18   46.33   17.30
  -5   0  17    2.20   10.33
  -5   0  16   -3.30    8.03
  -5   0  15   -4.90    4.93
  -5   0  15    3.00    6.88
  -5   0  14   32.01    7.00
  -5   0  14   22.93    5.85
  -5   0  13   -2.10    5.55
  -5   0  13    0.10    4.63
  -5   0  12   69.34    7.90
  -5   0  12   58.53    8.25
  -5   0  11   -3.15    4.10
  -5   0  11    2.80    4.35
  -5   0  10  288.05   26.28
  -5   0  10  265.82   26.30
  -5   0   9    0.15    3.05
  -5   0   9    0.43    2.13
  -5   0   9   -1.43    2.98
  -5   0   8  451.43   29.80
  -5   0   8  396.07   29.78
  -5   0   7    0.23    2.35
  -5   0   7   -2.65    2.43
   5   0  -7    0.45    3.45
  -5   0   7   -0.10    2.15
   5   0  -7    1.00    3.05
   5   0  -6  708.39   55.23
  -5   0   6  557.24   54.28
  -5   0   6  518.31   54.36
  -5   0   6  627.38   54.28
  -5   0   5    1.90    2.53
  -5   0   5    1.83    1.93
   5   0  -5    2.20    2.98
   5   0  -4 1027.65   94.97
  -5   0   4 1011.17   94.69
  -5   0   3    0.08    9.13
  -5   0   3    1.38    3.33
   5   0  -3    1.90    2.48
  -5   0   2    7.75    9.53
   5   0  -2   10.18    3.13
  -5   0   1    0.60    2.30
  -5   0   1   -4.68   11.30
   5   0  -1    0.20    3.03
  -5   0   0  868.62   85.24
   5   0   0 1080.03   86.01
  -5   0  -1   -0.58    3.18
   5   0   1    6.45    6.35
   5   0   2  182.28   16.25
   5   0   2   82.84   18.00
   5   0   3   -1.15    1.70
   5   0   3    1.28    1.50
   5   0   4 1051.78   94.57
   5   0   4  990.82   94.52
   5   0   5    1.65    2.63
   5   0   5    1.75    2.25
   5   0   6 1182.57  106.39
   5   0   6 1113.16  106.32
   5   0   7    1.95    3.23
   5   0   8    0.55    3.48
   5   0   8   -0.75    3.48
   5   0   9    1.90    3.05
   5   0  10  480.71   18.28
   5   0  10  448.38   18.53
   5   0  11    1.68    2.93
   5   0  12  231.04   21.93
   5   0  13   -0.40    1.73
  -5   1  18    9.00   11.00
  -5   1  17   16.05    8.15
  -5  -1  17   20.68   14.33
  -5   1  16    6.58    4.75
  -5  -1  16   -0.43   10.23
  -5   1  16   11.65    7.08
  -5   1  15    5.73    6.73
  -5   1  15    6.85    4.90
  -5  -1  15    8.95    7.85
  -5  -1  14   26.08    7.60
  -5   1  14   27.58    6.23
  -5  -1  13   25.45    6.08
  -5   1  13   25.48    5.75
  -5  -1  13    7.60    5.00
  -5   1  13   12.85    4.75
  -5  -1  12  111.09   10.95
  -5   1  12   97.42   10.93
  -5  -1  12   96.17   11.23
  -5   1  12   94.22   11.15
  -5  -1  11  187.71   15.28
  -5   1  11  161.05   15.20
  -5  -1  11  132.52   14.83
  -5  -1  11  155.73   15.25
  -5   1  11  139.27   15.25
  -5   1  10  200.46   16.08
  -5  -1  10  170.35   16.05
  -5  -1  10  205.23   16.08
  -5   1   9   97.19    7.28
  -5  -1   9   99.24    7.23
  -5  -1   9   87.69    7.30
  -5  -1   8   -0.50    2.78
  -5  -1   8    0.73    2.38
  -5  -1   8    0.33    2.68
  -5   1   8    3.45    2.68
  -5  -1   7  240.84   17.53
  -5   1   7  210.61   17.48
  -5   1   7  150.00   17.50
  -5  -1   7  217.21   17.58
  -5  -1   7  111.19   17.43
  -5   1   7  189.56   17.48
   5  -1  -7  230.29   18.80
  -5  -1   6  115.14   10.30
  -5   1   6   96.87    9.95
   5  -1  -6  108.74    9.80
  -5   1   6  134.70   10.30
   5   1  -6  104.67   10.83
   5  -1  -6  115.29   11.08
  -5   1   6   99.62   10.03
  -5   1   5  549.39   34.38
   5   1  -5  378.59   34.71
  -5  -1   5  222.74   34.03
  -5  -1   5  387.39   34.01
   5  -1  -5  394.57   34.71
   5  -1  -5  367.51   33.86
  -5  -1   5  364.19   34.28
  -5   1   5  371.11   34.08
  -5   1   4   68.96    6.03
  -5   1   4   45.93    5.20
  -5  -1   4   42.43    8.78
  -5   1   4   54.68    6.18
   5  -1  -4   54.11    6.00
  -5  -1   4   53.48    5.23
   5   1  -4   57.18    6.33
  -5  -1   4   30.78    5.38
   5  -1  -4   52.48    4.95
  -5   1   3  508.01   56.68
   5  -1  -3  611.78   56.71
  -5  -1   3  641.83   56.33
   5  -1  -3  609.63   56.21
  -5  -1   3  468.33   57.58
  -5   1   3  510.09   57.46
   5   1  -3  726.25   57.01
   5  -1  -2  102.52   11.45
  -5   1   2  124.85   12.88
  -5  -1   2  111.79   11.20
  -5   1   2  105.89   11.20
  -5   1   2   84.51   15.78
   5  -1  -2  138.27   11.18
   5  -1  -2  125.12   12.35
   5   1  -2  118.72   11.95
  -5  -1   2  108.94   14.43
  -5  -1   1  618.53   78.59
   5  -1  -1  995.62   78.89
  -5   1   1  954.01   78.51
   5   1  -1  788.28   78.34
   5   1  -1 1161.49   79.49
   5  -1  -1 1093.36   79.56
  -5   1   1  954.01   80.44
  -5   1   0  105.92    8.45
   5   1   0   78.16    8.03
   5   1   0   69.89    7.83
   5  -1   0   83.86    7.88
   5  -1   0  116.37    9.08
   5  -1   0  117.74   10.20
  -5   1  -1  275.82   18.48
  -5  -1  -1  109.99   18.18
   5   1   1  204.96   18.15
   5   1   1  174.65   17.83
   5  -1   1  209.11   17.90
   5  -1   1  262.29   20.15
  -5  -1  -2   23.75    3.75
   5   1   2   15.75    2.08
   5  -1   2   17.58    2.45
   5   1   2   17.85    3.15
   5  -1   2   12.90    6.03
   5   1   3  651.96   54.43
   5   1   3  590.55   53.81
   5  -1   3  607.05   53.88
   5  -1   3  588.95   53.86
   5  -1   3  292.17   55.06
   5   1   3  342.71   55.66
   5   1   4   51.76    5.18
   5  -1   4   49.76    5.18
   5   1   4   45.63    5.00
   5  -1   4   49.16    5.20
   5  -1   5  458.83   45.51
   5   1   5  508.59   45.61
   5  -1   5  518.11   45.63
   5   1   5  465.98   45.53
   5  -1   5  517.94   45.63
   5  -1   6    5.75    2.45
   5  -1   6    7.93    3.18
   5   1   6    6.13    2.58
   5  -1   6    7.58    3.03
   5   1   7  199.08   18.63
   5  -1   7  209.59   18.60
   5   1   7  173.73   18.48
   5  -1   7  199.41   18.68
   5   1   8    2.48    3.28
   5  -1   8    1.80    3.75
   5   1   9   95.29    7.03
   5  -1   9   99.97    7.50
   5  -1  10   14.68    3.05
   5   1  10    7.85    3.78
   5   1  10    9.80    2.83
   5   1  11  160.48   15.25
   5  -1  11  182.23   15.33
   5  -1  12    7.35    2.10
   5   1  12    6.25    2.60
   5   1  13   33.63    3.90
   5   1  14    1.05    1.30
  -5   2  18    4.35    8.18
  -5   2  17   15.45    6.65
  -5   2  16   -0.90    6.08
  -5   2  16   -0.23    4.65
  -5  -2  16   11.80   14.05
  -5  -2  15   40.16   10.70
  -5   2  15   22.05    5.50
  -5   2  14    9.73    4.98
  -5  -2  14   14.55    7.73
  -5   2  13  289.07   31.06
  -5  -2  13  389.14   31.73
  -5   2  12  128.95   13.75
  -5  -2  12  135.20   14.00
  -5  -2  11  254.69   24.45
  -5   2  11  271.65   24.40
  -5   2  11  235.19   24.23
  -5   2  10   84.44    7.58
  -5   2  10   78.39    7.63
  -5  -2  10   79.56    7.83
  -5   2   9  105.04    9.38
  -5   2   9  128.37    9.53
  -5  -2   9  125.62    9.70
  -5   2   8   34.06    4.35
  -5   2   8   32.56    4.33
  -5  -2   8   37.16    4.85
  -5  -2   8   44.48    4.23
   5   2  -8   47.66    6.18
  -5  -2   7   98.34    9.95
  -5  -2   7  120.80    9.53
   5  -2  -7  116.34    9.25
  -5   2   7   95.92    9.48
  -5   2   6   37.96    4.45
  -5  -2   6   41.36    5.70
  -5   2   6   39.11    4.53
  -5  -2   6   45.48    4.53
   5  -2  -6   40.16    4.15
  -5   2   5  455.75   30.08
  -5  -2   5  144.20   29.60
  -5   2   5  348.63   29.60
   5   2  -5  354.81   29.60
  -5  -2   5  344.28   29.63
  -5  -2   5  181.03   30.51
   5  -2  -5  256.84   29.63
  -5   2   5  361.41   29.70
   5   2  -5  338.51   30.56
   5  -2  -5  366.16   29.50
  -5   2   4    8.93    3.65
  -5   2   4    8.45    3.63
  -5  -2   4    8.18    8.83
   5  -2  -4   10.20    3.40
   5  -2  -4    7.43    1.55
  -5   2   4    7.45    2.08
   5  -2  -4    7.83    1.85
  -5  -2   4    5.63    2.05
   5   2  -4    7.63    1.53
   5   2  -4   10.93    3.45
   5  -2  -4    7.03    2.45
  -5  -2   3  106.42    9.10
  -5   2   3  113.37   11.50
   5  -2  -3   99.57    9.65
  -5  -2   3   86.21   12.15
   5  -2  -3  109.24    9.00
   5   2  -3  123.85   10.43
   5  -2  -3  112.42    9.70
  -5   2   3   95.14   12.78
   5  -2  -3   98.52    8.95
   5  -2  -2  175.65   14.68
  -5   2   2  144.10   19.23
   5  -2  -2  152.38   14.23
  -5  -2   2  175.28   13.95
  -5   2   2  162.83   13.98
   5   2  -2  148.40   13.70
   5  -2  -2  162.70   13.83
   5   2  -2  193.96   15.18
   5  -2  -2  136.85   13.75
  -5  -2   1   65.71    7.43
   5  -2  -1   69.81    7.55
  -5  -2   1   82.21    7.45
  -5   2   1   84.16    7.58
   5   2  -1   67.99    7.08
  -5  -2   1   85.36    8.38
   5   2  -1  102.79    9.18
   5  -2  -1   73.71    7.18
   5  -2  -1   71.91    7.20
   5  -2  -1   91.89    8.60
  -5   2   1   95.07   15.80
  -5   2   0  144.30   11.03
   5   2   0   89.19   10.43
  -5  -2   0  134.10   10.78
  -5  -2   0   96.89   11.15
   5  -2   0  112.49   10.58
   5  -2   0  141.80   12.40
   5  -2   0  123.75   10.98
  -5  -2  -1   11.73    2.63
  -5   2  -1   13.63    3.75
   5   2   1    9.50    2.75
   5   2   1    7.25    1.70
   5  -2   1   11.15    4.73
   5  -2   1    8.90    2.10
  -5  -2  -1   12.20    3.30
  -5  -2  -2   30.71    3.50
   5  -2   2   22.03    2.68
   5   2   2   20.05    2.83
   5   2   2   26.30    3.95
   5  -2   2   26.00    3.20
   5  -2   2   31.53    5.88
  -5  -2  -2   24.78    3.75
  -5  -2  -3   56.03    5.25
   5  -2   3   43.48    4.90
   5   2   3   49.43    6.05
   5   2   3   45.33    4.83
   5  -2   3   52.16    5.25
  -5  -2  -4  255.97   22.70
   5  -2   4  225.89   22.63
   5   2   4  234.19   22.60
   5  -2   4  251.72   22.73
   5  -2   4  247.04   22.78
   5  -2   5    6.35    2.35
   5  -2   5    8.60    2.75
   5  -2   5    8.45    3.30
   5   2   6  187.46   17.18
   5  -2   6  159.35   17.00
   5  -2   6  195.91   17.23
   5  -2   6  187.78   17.30
   5   2   7   83.49    8.40
   5  -2   7   66.71    8.18
   5  -2   7   87.89    8.43
   5  -2   7   87.94    8.78
   5   2   8  127.85   13.05
   5  -2   8  139.95   13.38
   5   2   9  127.35    9.10
   5  -2   9  147.90    9.68
   5  -2   9  122.85    9.00
   5   2  10    1.05    3.45
   5   2  10    0.30    2.58
   5  -2  10   -0.20    4.33
   5  -2  10    1.00    2.23
   5   2  11   16.95    3.23
   5   2  11   10.65    3.78
   5   2  12    1.50    2.55
   5   2  12   -1.10    2.05
   5   2  13    4.90    2.10
   5   2  14    0.33    1.40
  -5   3  17    1.38    3.88
  -5   3  16   39.33    5.95
  -5   3  15    7.08    4.55
  -5   3  15   14.30    5.63
  -5  -3  14  145.57   18.40
  -5   3  14  190.43   14.50
  -5  -3  13    9.50    8.08
  -5   3  13    5.58    4.83
  -5   3  13    9.83    5.20
  -5   3  12  343.31   30.63
  -5  -3  12  371.16   31.38
  -5   3  12  277.00   30.46
  -5   3  11   26.83    5.15
  -5   3  11   27.60    5.70
  -5  -3  11   31.88    7.45
  -5  -3  10  206.56   15.30
  -5   3  10  197.08   14.30
  -5  -3   9   93.12    8.60
  -5   3   9   86.01    7.35
  -5   3   8  129.52   10.43
  -5  -3   8  127.40   11.88
  -5   3   8  121.30   10.38
  -5   3   7   75.51    6.15
  -5  -3   7   75.34    5.83
  -5  -3   7   68.31    9.38
  -5   3   7   67.24    6.00
  -5  -3   7   23.93    5.85
  -5  -3   7   38.33    5.98
  -5   3   6  172.35   13.58
  -5  -3   6  181.36   13.48
  -5  -3   6  100.42   16.45
  -5  -3   6   70.51   13.53
  -5   3   6  167.60   13.58
  -5  -3   6  120.40   13.60
  -5  -3   5   66.66   12.85
  -5   3   5   83.74   10.98
  -5  -3   5  103.54    9.35
  -5   3   5   97.24    9.40
  -5  -3   5   80.01    9.55
  -5   3   5  115.34    9.78
  -5   3   4  238.46   23.45
  -5  -3   4  264.19   23.63
   5  -3  -4  218.84   23.35
  -5  -3   4  254.77   23.43
  -5  -3   4  193.81   24.73
   5  -3  -4  280.50   23.48
   5   3  -4  283.22   24.63
  -5   3   4  329.91   26.78
  -5   3   4  306.30   24.10
  -5  -3   3    3.38    2.23
   5  -3  -3    1.48    1.50
  -5   3   3    1.88    2.10
  -5  -3   3    2.40    1.80
  -5   3   3    6.60   11.25
  -5   3   3    2.28    8.68
   5   3  -3    4.08    3.68
   5  -3  -3    3.65    2.08
   5  -3  -3    1.85    1.90
  -5  -3   2  254.04   23.88
  -5   3   2  235.61   27.90
  -5   3   2  265.69   24.00
  -5  -3   2  282.75   24.98
   5  -3  -2  247.77   24.35
   5  -3  -2  268.32   23.90
  -5  -3   2  293.10   23.98
   5  -3  -2  260.42   24.38
   5  -3  -2  218.69   23.78
  -5  -3   1   87.79    7.43
  -5   3   1   60.89    7.23
   5  -3  -1   70.59    7.58
  -5   3   1   84.76    7.65
  -5  -3   1   86.51    9.00
   5  -3  -1   69.66    7.15
   5  -3  -1   77.31    7.33
   5  -3  -1   83.66    8.25
  -5  -3   0   97.59   10.75
  -5   3   0  114.57   10.00
   5  -3   0   88.04    9.43
   5  -3   0  105.12    9.63
  -5  -3   0  112.29    9.65
   5  -3   0   94.97    9.53
   5  -3   0   86.94   10.58
  -5  -3  -1   48.16    6.63
  -5   3  -1   55.68    6.23
   5  -3   1   45.68    5.30
   5  -3   1   55.58    5.73
   5  -3   1   62.94    5.93
   5  -3   1   49.51    6.80
  -5  -3  -1   55.78    5.45
  -5  -3  -2    9.88    2.13
   5  -3   2    8.28    2.05
   5  -3   2    7.18    2.70
  -5  -3  -2   11.73    3.65
   5  -3   2    8.65    4.48
   5  -3   3   70.91    7.25
  -5  -3  -3   70.26    7.15
   5  -3   3   81.96    7.65
   5  -3   4   46.98    5.48
   5  -3   4   59.38    6.15
   5   3   5    1.90    2.63
   5  -3   5   -0.55    2.75
   5  -3   5    2.40    2.65
   5  -3   5    1.18    3.48
   5   3   6   14.93    3.45
   5  -3   6   15.25    3.40
   5  -3   6   15.00    3.20
   5  -3   6   15.75    4.13
   5   3   7   25.10    4.13
   5  -3   7   25.03    3.95
   5  -3   7   19.18    3.90
   5  -3   7   28.30    4.83
   5   3   8   52.01    4.33
   5  -3   8   54.08    4.45
   5   3   9    2.30    2.65
   5   3  10   29.18    4.90
   5   3  11    0.18    3.68
   5   3  11    1.53    3.20
   5   3  12    1.83    2.70
   5   3  12    3.93    2.40
   5   3  13   -1.48    2.00
   5   3  13    0.60    1.65
   5   3  14    0.48    1.30
  -5   4  17   11.85    3.98
  -5   4  17   44.56    5.65
  -5   4  16    1.05    4.45
  -5   4  16    1.18    3.75
  -5   4  15   23.55    5.85
  -5   4  15   56.11    6.05
  -5   4  14   22.03    4.95
  -5   4  14   25.78    5.43
  -5   4  13  101.07   10.43
  -5   4  13   86.96   10.00
  -5   4  12   31.78    5.40
  -5   4  11  118.04   11.90
  -5  -4  10   -1.75   13.93
  -5   4  10    8.25    4.15
  -5   4  10   11.60    4.43
  -5   4   9   20.53    4.08
  -5  -4   9   13.10    4.60
  -5   4   9   22.23    4.08
  -5  -4   9   24.08   13.15
  -5   4   8  212.89   19.40
  -5   4   8  195.41   19.33
  -5  -4   8  212.81   19.53
  -5  -4   7   12.55   10.20
  -5   4   7   11.00    3.35
  -5  -4   7   11.60    3.38
  -5   4   7   13.28    3.23
  -5  -4   7    7.30    3.40
  -5   4   6  494.16   46.71
  -5  -4   6  552.22   47.01
  -5   4   6  542.17   46.83
  -5  -4   5   45.88    4.45
  -5   4   5   38.58    5.15
  -5  -4   5   18.50    7.50
  -5   4   5   24.15    3.78
  -5  -4   5   24.33    3.33
  -5  -4   5   29.25    3.93
  -5   4   5   50.68    8.08
  -5   4   4   96.44   11.48
  -5   4   4   76.81    9.08
   5  -4  -4   97.74    9.30
  -5  -4   4  102.69    9.25
   5  -4  -3   12.15    2.33
  -5   4   3   20.43   12.30
  -5   4   3    9.10   15.85
  -5   4   3   11.65    2.80
  -5  -4   3   15.93    2.78
   5  -4  -3   16.55    3.10
   5   4  -2  212.51   20.35
  -5   4   2  210.89   20.63
  -5  -4   2  250.39   22.45
   5  -4  -2  213.56   20.58
  -5  -4   2  229.29   20.53
   5   4  -1   83.39    7.85
  -5  -4   1   94.34    9.95
  -5   4   1   87.31    8.48
   5  -4  -1   75.51    8.03
   5  -4  -1   89.94    8.25
   5  -4  -1   72.26    8.73
   5  -4  -1   69.51    7.98
  -5  -4   1   91.94    8.08
  -5  -4   0  418.25   33.13
   5   4   0  333.01   32.98
  -5  -4   0  356.41   34.46
   5  -4   0  328.98   33.03
   5  -4   0  387.36   33.21
   5  -4   0  339.91   33.91
   5  -4   0  336.38   33.06
  -5  -4  -1  191.08   16.98
   5  -4   1  185.01   18.25
   5   4   1  159.58   16.90
   5  -4   1  168.30   17.00
   5  -4   1  207.61   17.33
   5  -4   1  195.86   17.15
   5   4   2  390.59   38.38
   5  -4   2  424.90   38.46
  -5  -4  -2  398.79   38.36
   5  -4   2  465.48   38.66
   5   4   3    3.08    2.18
   5  -4   3    0.88    2.58
   5  -4   3    2.48    3.65
   5   4   4   60.49    6.40
   5  -4   4   62.56    6.65
   5  -4   5   10.63    3.53
   5  -4   5    9.70    2.95
   5   4   6   62.34    6.70
   5  -4   6   71.34    7.03
   5  -4   6   56.06    6.60
   5   4   7    7.23    2.73
   5  -4   7   13.65    3.50
   5   4   8    3.48    2.55
   5  -4   8    4.15    3.20
   5   4   9    0.05    3.88
   5  -4   9    3.58    3.40
   5  -4   9    0.13    4.20
   5   4  10   19.20    4.05
   5   4  10   12.30    4.25
   5  -4  10   19.35    4.53
   5   4  11   12.75    3.53
   5   4  11    9.83    3.63
   5  -4  11    9.20    3.90
   5   4  12   -0.53    2.35
   5   4  13    4.25    1.73
  -5   5  17    6.43    4.40
  -5   5  16    8.85    3.95
  -5   5  16    6.13    3.55
  -5   5  15   24.40    4.50
  -5   5  15   25.68    4.53
  -5   5  14   -0.13    3.53
  -5   5  13   20.50    4.35
  -5   5  12    1.85    3.43
  -5   5  12    6.15    4.55
  -5   5  11    0.03    3.38
  -5   5  11    7.80    4.08
  -5   5  10   10.45    3.83
  -5   5  10   12.70    4.38
  -5   5   9   42.81    5.70
  -5   5   9   35.93    5.28
  -5   5   8    8.33    3.68
  -5  -5   8    7.78    4.43
  -5   5   8   10.98    3.93
  -5  -5   8   13.83    3.98
  -5   5   7  128.15   13.20
  -5   5   7  121.32   13.05
  -5  -5   7  160.15   13.50
  -5   5   6   21.45    4.10
  -5  -5   6   25.23    4.40
  -5   5   6   29.33    5.48
  -5   5   5  100.72   12.75
   5  -5  -5  130.50   13.18
  -5  -5   5  129.10   12.95
  -5  -5   4    6.85    2.55
  -5   5   4    6.35    3.03
   5  -5  -4    7.90    3.65
   5  -5  -3  197.76   17.63
  -5  -5   3  174.30   17.35
  -5  -5   2    0.45    2.18
   5  -5  -2    2.55    2.50
   5   5  -2   -3.30    1.73
   5  -5  -2   -2.65    3.60
   5   5  -1  874.37   81.26
   5  -5  -1  863.29   81.39
   5  -5  -1  994.72   81.56
   5  -5  -1  817.31   81.36
  -5  -5   1  875.02   81.31
   5   5   0   97.04    9.98
   5  -5   0  101.79   10.30
   5  -5   0  117.54   10.63
   5  -5   0   99.27   10.18
  -5  -5   0  108.72   10.00
   5   5   1  993.14   96.62
   5  -5   1 1075.66   96.77
   5  -5   1 1116.56   96.77
  -5  -5  -1 1023.20   96.62
   5   5   2   81.46    9.23
   5  -5   2  100.14    9.68
   5   5   3  596.98   59.03
   5  -5   3  697.84   59.21
   5   5   4   13.83    2.73
   5  -5   4   16.93    3.83
   5   5   5  288.87   29.65
   5  -5   5  375.09   30.03
   5  -5   6    1.08    3.50
   5  -5   6    0.55    2.20
   5  -5   6    5.50    4.30
   5   5   7  129.52   12.65
   5  -5   7   95.99   13.08
   5  -5   8    2.13    3.25
   5  -5   8   -0.05    3.78
   5   5   9   58.63    5.75
   5  -5   9   67.04    6.03
   5   5  10    0.43    3.13
   5   5  10    1.73    3.38
   5  -5  10   -1.00    3.45
   5   5  11   35.31    4.00
   5   5  11   30.96    3.63
   5   5  12    4.63    2.05
   5   5  12   11.83    2.45
   5   5  13    9.53    1.55
   5  -6 -16    0.60    1.85
  -5   6  15    5.93    3.45
   5  -6 -15    6.78    2.53
  -5   6  14   22.08    4.20
  -5   6  14   16.75    3.80
  -5   6  13    8.30    3.88
  -5   6  13    4.18    3.28
  -5   6  12   22.53    4.55
  -5   6  12   16.38    3.85
  -5   6  11    3.03    3.10
  -5   6  11    2.68    3.78
  -5   6  10   14.85    3.65
  -5   6  10   12.50    3.93
  -5   6   9    3.10    3.53
  -5   6   9    1.25    3.45
  -5   6   8  183.56   17.75
  -5   6   8  183.11   17.93
  -5  -6   7   -2.60    4.50
  -5   6   7    0.08    3.40
  -5  -6   7   -2.98    4.30
  -5   6   6   65.14    8.90
   5  -6  -6   95.22    9.73
  -5  -6   6   78.56    9.25
  -5   6   5   38.71    5.75
   5  -6  -5   46.36    6.60
  -5  -6   5   44.23    5.88
  -5   6   4   83.09   10.23
   5  -6  -4  109.54   10.70
  -5  -6   4   83.64   10.05
  -5  -6   3   61.36    6.48
   5  -6  -2  157.65   15.18
  -5  -6   2  157.45   15.03
   5  -6  -1   72.79    7.43
   5  -6  -1   69.51    7.25
  -5  -6   1   63.74    6.73
   5  -6   0  736.27   65.89
   5  -6   0  703.17   65.79
  -5  -6   0  693.52   65.64
   5  -6   1    2.00    3.38
   5   6   1    1.40    1.98
   5  -6   1    4.33    3.60
   5  -6   2  154.68   13.85
   5  -6   2  170.25   14.13
   5   6   3    4.68    2.38
   5  -6   3    2.98    3.75
   5  -6   3    5.80    4.75
   5  -6   4   80.49    7.88
   5  -6   4   56.66    8.28
   5  -6   5   -0.90    3.78
   5  -6   5   -4.13    4.05
   5  -6   6  171.98    9.45
   5  -6   6   32.98    8.75
   5   6   7    4.30    2.83
   5  -6   7    4.35    3.75
   5  -6   7   -0.33    3.38
   5  -6   8  203.21   13.85
   5   6   8  171.35   13.40
   5  -6   9   55.28    5.30
   5   6   9   47.71    4.80
   5  -6  10   34.98    6.48
   5   6  10   76.64    6.20
   5   6  11    6.10    1.75
   5   6  12   31.71    3.20
   5   6  12   25.60    2.98
  -5   7  15    2.23    2.35
   5  -7 -15   -0.43    1.68
   5  -7 -14   38.76    4.20
  -5   7  14   32.61    4.43
  -5   7  13    0.80    2.78
   5  -7 -13    3.15    2.63
   5  -7 -12   30.18    3.68
  -5   7  12   22.18    4.28
  -5   7  11    2.70    3.28
  -5   7  10   50.76    5.95
  -5   7   9   33.28    4.93
   5  -7  -9   45.01    5.63
  -5   7   8   28.23    4.45
   5  -7  -8   34.93    5.25
  -5   7   7   70.19    9.23
   5  -7  -7   92.89    9.90
  -5   7   6   36.28    5.63
  -5  -7   6   71.89    6.65
  -5   7   5   40.06    5.95
  -5  -7   5   65.84    6.85
  -5  -7   4   76.24    9.20
  -5  -7   4  118.52   10.05
   5  -7  -3   64.94    7.23
  -5  -7   3   65.39    7.00
   5  -7  -2   98.62    9.63
  -5  -7   2   86.26    8.85
   5  -7  -2   85.64    9.23
   5  -7  -1  337.23   29.58
   5  -7  -1  372.89   29.83
  -5  -7   1  284.35   29.18
   5  -7  -1  306.08   29.43
   5  -7   0  103.49   10.65
   5  -7   0  113.27   11.20
   5  -7   0   93.97   10.40
   5  -7   1  221.86   22.93
   5  -7   1  281.05   23.33
   5  -7   1  231.56   22.85
   5  -7   2   71.16    8.40
   5  -7   2   53.93    8.43
   5  -7   3   88.39    7.50
   5  -7   3   38.96    7.55
   5  -7   4   32.21    4.40
   5  -7   4    6.78    4.58
   5  -7   5   56.63    5.28
   5  -7   5   11.93    4.63
   5   7   6    0.38    1.93
   5  -7   6    2.33    3.83
   5  -7   6   -0.33    3.30
   5   7   7   33.83    3.95
   5  -7   7   38.26    4.65
   5   7   7   28.50    3.48
   5   7   8    0.05    1.85
   5   7   8    0.40    2.70
   5  -7   8    0.80    3.33
   5  -7   8   -1.65    2.83
   5   7   9   26.30    3.20
   5  -7   9   28.90    3.78
   5   7   9   20.45    2.60
   5   7  10    2.68    1.30
   5   7  10    3.03    1.90
   5  -7  10   -0.73    2.20
   5   7  11    6.15    1.65
   5  -8 -14    0.30    1.43
   5  -8 -13   38.71    3.98
  -5   8  13   32.38    4.13
   5  -8 -12    4.58    2.00
  -5   8  12    4.98    2.40
   5  -8 -12    5.63    2.28
  -5   8  11   55.71    6.95
   5  -8 -11   75.64    6.93
   5  -8 -11   71.81    7.05
  -5   8  10    2.13    2.65
  -5   8   9   44.23    5.15
  -5   8   8   -2.63    2.73
  -5   8   7  114.29   13.78
  -5  -8   7  221.21   14.63
  -5  -8   6   23.68    4.65
   5  -8  -5   23.93    5.15
  -5  -8   5   26.15    5.23
   5  -8  -4   20.25    4.20
  -5  -8   4   28.05    5.25
   5  -8  -4   25.83    5.25
  -5  -8   3    9.35    4.68
   5  -8  -3    9.48    3.55
   5  -8  -3   11.20    4.25
   5  -8  -3    8.55    4.63
   5  -8  -2   89.67    9.70
   5  -8  -2  102.97    9.93
   5  -8  -2   84.11    9.40
   5  -8  -1    7.98    3.50
   5  -8  -1   11.75    4.35
   5  -8  -1   12.70    4.90
   5  -8   0   23.13    4.30
   5  -8   0   29.43    4.95
   5  -8   0   27.70    5.65
   5  -8   1  117.82   12.65
   5  -8   1  118.42   12.73
   5  -8   1  134.75   12.53
   5  -8   2    1.50    4.18
   5  -8   2    3.70    3.95
   5  -8   3   -3.33    3.83
   5  -8   3   -1.10    3.95
   5  -8   4    4.35    3.88
   5  -8   4    2.45    3.45
   5   8   5   28.80    3.38
   5  -8   5   37.93    4.65
   5   8   6   -0.18    2.10
   5  -8   6   -3.00    3.63
   5  -8   6   -1.83    2.73
   5   8   7   20.60    2.85
   5  -8   7   28.55    3.90
   5   8   8   16.50    2.28
   5  -8   8   18.00    3.20
   5   8   9    7.58    1.70
   5  -8   9    6.78    2.55
   5  -8   9    1.93    1.90
   5   8  10    0.83    1.13
   5  -9 -13   -0.38    1.18
   5  -9 -12   52.28    5.18
   5  -9 -11   16.70    2.45
   5  -9 -10   42.61    4.65
   5  -9  -9    4.70    2.45
   5  -9  -8  100.27   10.15
   5  -9  -8  107.62   10.35
   5  -9  -7    2.15    3.45
   5  -9  -6  192.78   17.23
  -5  -9   6  159.60   17.33
   5  -9  -5   14.75    3.63
   5  -9  -5   20.70    4.10
  -5  -9   5   12.18    4.28
   5  -9  -4   78.94    7.95
   5  -9  -4   88.09    8.05
   5  -9  -4   71.71    7.65
   5  -9  -3   19.93    3.90
   5  -9  -3   19.10    4.20
   5  -9  -3   17.58    4.53
   5  -9  -2    9.73    3.38
   5  -9  -2   10.33    4.10
   5  -9  -2    6.30    4.28
   5  -9  -1   44.93    5.93
   5  -9  -1   38.31    5.53
   5  -9  -1   33.41    4.85
  -5  -9   0    2.83    4.30
   5  -9   0    3.40    3.18
   5  -9   0    5.25    4.13
   5  -9   0    4.85    3.95
   5  -9   1    4.98    4.03
   5  -9   1    2.60    3.85
   5  -9   1    4.73    3.60
   5  -9   2    0.20    3.65
   5  -9   2   -4.33    3.58
   5  -9   3  123.72    7.73
   5  -9   3   32.76    7.03
   5   9   4   23.98    2.83
   5  -9   4   12.78    3.65
   5   9   5   28.25    2.93
   5  -9   5   43.86    4.50
   5   9   6    8.20    1.63
   5  -9   6   11.65    3.08
   5  -9   6    3.85    2.28
   5   9   7    0.40    1.40
   5  -9   7   -1.75    2.50
   5  -9   7    0.78    1.85
   5   9   8    1.65    1.03
   5  -9   8    0.63    2.08
   5  -9   8    1.35    1.48
   5 -10 -11    0.13    1.08
   5 -10 -11    0.95    1.03
   5 -10 -11    0.85    1.10
   5 -10 -10   21.88    2.68
   5 -10 -10   20.38    2.68
   5 -10 -10   26.73    2.73
   5 -10  -9   21.90    3.00
   5 -10  -9   26.68    3.08
   5 -10  -9   26.00    3.03
   5 -10  -8   15.03    2.73
   5 -10  -8   19.18    2.75
   5 -10  -8   19.93    2.73
   5 -10  -7   18.10    2.95
   5 -10  -7   18.50    2.95
   5 -10  -6    3.70    2.43
   5 -10  -6    2.13    2.48
   5 -10  -6    2.43    2.50
   5 -10  -5   19.10    3.35
   5 -10  -5   19.18    3.50
   5 -10  -5   21.70    3.50
   5 -10  -4   62.76    6.85
   5 -10  -4   70.01    6.98
   5 -10  -4   58.46    6.65
   5 -10  -3    2.75    2.68
   5 -10  -3    3.40    3.13
   5 -10  -3    0.40    3.30
   5 -10  -2   85.84    7.85
   5 -10  -2   92.69    7.98
   5 -10  -2   77.64    7.58
   5 -10  -1    2.65    3.63
   5 -10  -1   -1.03    3.28
   5 -10  -1    0.70    2.90
  -5 -10   1    6.90    3.88
   5 -10   0   76.74    8.70
   5 -10   0   73.44    8.50
   5 -10   0   87.34    8.75
  -5 -10   0   96.89    8.90
  -5 -10  -1    0.25    3.40
   5 -10   1    2.13    3.20
   5 -10   1   -0.58    2.90
  -5 -10  -2   17.53    3.45
   5 -10   2   13.28    3.25
   5 -10   2    8.05    3.10
  -5 -10  -3    2.38    2.70
   5 -10   3    1.50    2.93
   5 -10   3    2.25    2.25
  -5 -10  -4   70.49    4.65
   5 -10   4   60.26    5.05
   5 -10   5   14.03    2.65
  -5 -10  -5   11.33    2.05
   5 -10   6   34.38    2.90
  -5 -10  -6   29.93    2.38
   5 -10   7   -0.03    1.50
   5 -11  -8    4.75    1.33
   5 -11  -8    5.30    1.35
   5 -11  -7   17.03    2.33
   5 -11  -7   17.83    2.33
   5 -11  -7   17.38    2.28
   5 -11  -6    1.05    1.55
   5 -11  -6   -0.23    1.73
   5 -11  -6    0.13    1.73
   5 -11  -5   29.08    3.53
   5 -11  -5   29.75    3.50
   5 -11  -5   29.50    3.38
   5 -11  -4   -1.15    1.85
   5 -11  -4    0.80    2.03
   5 -11  -4   -0.48    2.03
   5 -11  -3   60.01    6.18
   5 -11  -3   57.43    6.03
   5 -11  -3   59.21    6.00
   5 -11  -2    2.60    2.53
   5 -11  -2    2.98    2.48
   5 -11  -2    2.73    2.08
  -5 -11   2    1.25    2.40
   5 -11  -1   62.46    6.48
   5 -11  -1   57.81    6.38
  -5 -11   1   68.74    6.55
   5 -11   0    0.98    2.23
   5 -11   0   -1.58    2.05
  -5 -11   0    0.30    2.28
   5 -11   1   39.51    4.60
   5 -11   1   35.91    4.30
  -5 -11  -1   49.66    4.60
   5 -11   2    1.85    2.20
   5 -11   2    1.10    1.53
  -5 -11  -2    1.48    1.93
   5 -11   3    7.75    2.15
  -5 -11  -3    6.18    1.78
   5 -11   4    0.60    1.65
   5 -12  -3   -0.45    1.13
   5 -12  -2   14.55    1.85
   5 -12  -1   -0.83    1.18
  -6   0  18   10.35   34.23
  -6   0  17   -6.95   16.38
  -6   0  16   40.56   12.70
  -6   0  15   -1.48    9.25
  -6   0  15    0.20    5.23
  -6   0  14   71.11   10.45
  -6   0  13    2.00    6.38
  -6   0  13   -2.28    4.85
  -6   0  12  157.83   14.80
  -6   0  12  129.47   14.80
  -6   0  11    0.85    4.55
  -6   0  11    1.73    5.58
  -6   0  10  137.87    8.90
  -6   0  10  112.62    9.10
  -6   0   9    1.40    4.25
  -6   0   9    1.33    2.85
  -6   0   9    0.53    3.70
  -6   0   8  798.51   70.86
  -6   0   8  731.95   70.94
  -6   0   8  742.37   70.94
  -6   0   7   -0.20    2.85
  -6   0   6  971.19   90.52
  -6   0   5    2.00    2.80
  -6   0   5    1.10    2.45
   6   0  -5   -0.35    2.85
  -6   0   4  430.80   41.58
   6   0  -4  459.98   41.98
  -6   0   3    2.18    3.88
  -6   0   3    1.08    9.60
   6   0  -3    1.33    3.00
  -6   0   2  450.20   49.11
  -6   0   2  509.01   47.48
   6   0  -2  535.31   48.06
  -6   0   1    0.33    2.68
   6   0  -1   -0.80    3.93
  -6   0   0   36.91    5.05
   6   0   0   47.26    7.73
   6   0   1    0.05    1.70
   6   0   1    0.13    1.43
   6   0   2  409.37   38.13
   6   0   3   -0.33    2.15
   6   0   3   -0.25    1.85
   6   0   4  460.43   42.01
   6   0   4  440.45   41.93
   6   0   5    0.95    2.80
   6   0   5   -2.20    2.55
   6   0   6  491.48   43.68
   6   0   6  446.80   43.58
   6   0   7   -1.53    3.05
   6   0   8   78.64    7.65
   6   0   8   63.79    7.43
   6   0   9   -0.73    3.03
   6   0  10   20.83    3.63
   6   0  10   22.65    3.28
   6   0  11    1.33    2.25
   6   0  12    7.38    1.88
  -6   1  18    5.70   20.00
  -6  -1  17   15.85   29.13
  -6   1  17   21.73   12.15
  -6   1  16   -4.28    9.15
  -6   1  16    3.00    5.03
  -6  -1  16    4.78   16.63
  -6  -1  15   25.13   11.60
  -6   1  15   44.31    8.80
  -6   1  14   33.31    7.25
  -6   1  14    6.08    5.38
  -6  -1  14   11.60    5.28
  -6  -1  14   35.58    9.28
  -6   1  13   67.36    8.65
  -6  -1  13   51.28    8.50
  -6  -1  13  100.22   10.58
  -6   1  13   80.86    9.25
  -6  -1  12   40.43    7.78
  -6   1  12   27.43    6.23
  -6   1  12   26.80    5.48
  -6   1  11  125.42    9.05
  -6  -1  11  124.72    9.95
  -6  -1  10   49.23    6.70
  -6   1  10   46.11    5.50
  -6   1   9  307.78   19.25
  -6  -1   9  297.62   19.70
  -6  -1   9  188.43   19.00
  -6   1   9  125.40   18.80
  -6  -1   8    4.30    3.18
  -6   1   8    6.13    3.00
  -6   1   8    5.80    3.30
  -6  -1   8    8.53    3.35
  -6  -1   8    6.18    4.78
  -6   1   7  835.39   81.36
  -6  -1   7  869.52   81.39
  -6  -1   7  736.75   81.61
  -6   1   7  811.11   81.46
  -6  -1   7  795.81   81.54
  -6  -1   6    2.00    7.68
   6  -1  -6    1.68    2.15
  -6  -1   6    0.20    3.05
  -6   1   6    1.73    2.58
  -6  -1   6   -1.13    2.55
  -6   1   6    3.90    4.30
  -6   1   5 1601.49  161.70
   6  -1  -5 1686.38  162.10
  -6  -1   5 1726.71  161.48
  -6  -1   5 1442.17  161.63
  -6   1   5 1468.05  161.88
   6   1  -5 1688.26  162.20
  -6  -1   4   26.20   10.53
  -6  -1   4   20.15    4.25
  -6   1   4   28.25    4.55
  -6  -1   4   26.15    3.58
  -6   1   4   24.85    3.70
   6   1  -4   27.05    3.03
   6   1  -4   31.98    4.78
   6  -1  -4   37.13    3.60
   6  -1  -4   27.73    4.23
  -6   1   4   18.30   11.55
  -6  -1   3  831.89  103.49
   6  -1  -3 1100.76  103.12
  -6  -1   3 1157.02  102.72
  -6   1   3 1088.68  102.72
   6   1  -3 1115.89  102.59
   6  -1  -3 1225.01  103.47
   6   1  -3 1289.07  103.52
  -6   1   3  802.01  103.82
  -6  -1   2    5.53    3.35
  -6  -1   2    4.45    2.58
  -6   1   2    5.30    2.60
   6   1  -2   -0.08    3.85
   6   1  -2    3.85    1.48
   6  -1  -2    3.98    2.90
   6  -1  -2    3.63    1.45
   6  -1  -2    7.35    4.18
  -6   1   2    6.20   11.05
  -6  -1   1   42.93    7.20
  -6   1   1   68.61    6.73
   6   1  -1   59.69    6.05
   6  -1  -1   59.63    6.05
   6   1  -1   91.94    8.38
   6  -1  -1   75.61    8.23
   6  -1  -1   78.26    7.35
   6  -1   0  198.76   17.48
  -6   1   0  204.23   16.08
   6   1   0  146.85   15.53
   6  -1   0  170.18   15.58
   6   1   1   57.13    6.23
   6  -1   1   64.79    6.28
   6   1   2   21.40    3.08
   6  -1   2   25.03    3.15
   6  -1   2   26.58    3.10
   6  -1   3  202.11   18.50
   6   1   3  185.13   18.38
   6  -1   3  204.21   18.48
   6   1   4    0.30    2.43
   6  -1   4    1.65    2.40
   6   1   4    2.85    2.05
   6  -1   4    3.00    2.35
   6  -1   5  402.64   33.88
   6   1   5  338.48   33.71
   6  -1   5  353.43   33.78
   6  -1   6   52.93    5.93
   6   1   6   51.71    5.68
   6  -1   6   46.63    5.88
   6   1   7    1.78    3.35
   6  -1   7    1.83    3.13
   6   1   8  269.05   25.93
   6  -1   8  285.70   25.98
   6  -1   8  267.19   25.93
   6   1   9   47.61    5.30
   6  -1   9   52.91    5.65
   6  -1   9   37.16    5.18
   6  -1   9   40.73    5.30
   6   1  10   41.61    4.90
   6   1  10   33.36    5.08
   6  -1  11   10.20    2.23
   6   1  11   11.48    3.00
   6   1  12    8.73    2.15
   6   1  13    2.30    1.30
  -6   2  18  -11.13   15.73
  -6   2  17    0.65    4.03
  -6   2  17   -6.70    9.00
  -6  -2  16   -4.33   30.56
  -6  -2  15   14.18   18.63
  -6   2  15   18.58    5.75
  -6   2  14    3.30    5.15
  -6  -2  14   27.83   11.68
  -6   2  13  122.42   13.03
  -6  -2  13  125.47   15.33
  -6   2  12  102.79   10.98
  -6  -2  12  109.54   12.93
  -6  -2  12  104.12   10.68
  -6   2  12   88.94   10.93
  -6   2  11  179.26   14.95
  -6  -2  11  191.53   14.88
  -6  -2  11  178.88   16.48
  -6   2  11  148.40   14.88
  -6   2  10  154.93   13.83
  -6  -2  10  177.43   13.90
  -6  -2  10  162.85   15.25
  -6   2  10  144.82   13.85
  -6  -2   9   16.43    7.23
  -6   2   9   16.58    4.40
  -6  -2   9    9.88    3.53
  -6   2   9   18.28    4.10
  -6  -2   9   21.60    4.03
  -6  -2   8   46.86    9.18
  -6  -2   8   57.91    6.18
   6  -2  -8   60.34    5.60
  -6   2   8   54.21    6.53
  -6  -2   8   35.58    6.18
  -6   2   7   21.80    4.95
   6  -2  -7   27.28    3.50
  -6  -2   7   16.60    4.28
  -6  -2   7   10.18   10.20
  -6  -2   7   23.85    4.05
  -6   2   6  314.03   21.88
  -6   2   6  209.79   21.48
  -6  -2   6  230.11   21.45
  -6  -2   6  156.85   21.60
   6  -2  -6  224.54   21.28
   6  -2  -6  245.82   21.30
  -6  -2   6  125.50   24.58
  -6   2   6  242.77   21.90
  -6   2   5   18.18    7.33
  -6   2   5   25.83    3.33
  -6  -2   5    8.38    3.48
  -6   2   5   16.05    3.68
  -6  -2   5   18.08    3.15
  -6  -2   5   18.68   10.00
   6  -2  -5   18.33    2.53
   6  -2  -5   26.78    2.70
   6  -2  -5    9.48    3.90
  -6   2   4   92.07   17.90
   6  -2  -4  128.87   13.50
  -6  -2   4   94.14   15.33
  -6  -2   4  139.02   12.98
  -6   2   4  131.27   13.03
   6  -2  -4  140.05   12.78
   6   2  -4  150.73   14.25
   6  -2  -4  134.10   12.80
  -6  -2   3  134.62   17.28
   6  -2  -3  148.55   14.98
  -6  -2   3  167.08   14.63
  -6   2   3  158.85   14.68
   6   2  -3  160.33   14.38
   6  -2  -3  153.58   14.40
   6   2  -3  183.43   15.85
   6  -2  -3  162.73   14.50
   6  -2  -3  166.25   15.20
  -6   2   3  132.20   19.30
  -6   2   2   36.43   13.10
   6  -2  -2   29.78    3.93
  -6  -2   2   12.83    4.00
  -6  -2   2   30.91    3.85
  -6   2   2   28.68    3.98
   6   2  -2   28.38    3.18
   6   2  -2   34.08    5.50
   6  -2  -2   29.03    3.25
   6  -2  -2   39.53    3.93
   6  -2  -2   32.41    4.93
  -6  -2   1   21.73    4.23
  -6  -2   1   31.91    4.00
  -6   2   1   32.98    4.23
   6   2  -1   29.10    3.28
   6  -2  -1   31.46    3.50
   6  -2  -1   35.31    5.53
  -6  -2   0   97.07    8.73
  -6   2   0   98.69    8.98
   6   2   0   76.74    8.18
   6  -2   0   81.61    8.25
   6  -2   0   96.87   10.43
  -6  -2  -1   85.79    7.68
  -6   2  -1   91.32    8.25
   6   2   1   63.24    7.15
   6  -2   1   72.14    7.28
  -6  -2  -2  188.96   16.23
   6   2   2  153.75   15.95
   6  -2   2  174.13   16.08
  -6  -2  -3    4.83    2.75
   6  -2   3    4.60    2.48
   6  -2   3    5.95    2.70
  -6  -2  -4   90.94    9.35
   6  -2   4   96.14    9.45
   6  -2   4   98.67    9.55
   6  -2   5   66.24    6.95
   6  -2   5   73.24    7.38
   6  -2   5   69.51    7.40
   6   2   6  118.89   11.75
   6  -2   6  105.49   11.43
   6  -2   6  137.90   11.85
   6  -2   6  122.75   11.83
   6   2   7  141.90   14.15
   6  -2   7  144.15   14.15
   6  -2   7  150.15   14.33
   6   2   8   27.10    4.13
   6  -2   8   25.43    4.30
   6   2   9  209.96   10.93
   6  -2   9  256.14   11.53
   6  -2   9   99.54   10.55
   6   2  10    6.38    3.58
   6   2  10   11.88    3.58
   6   2  11   18.05    3.88
   6   2  11   28.45    3.60
   6   2  12    5.38    2.18
   6   2  13    5.48    1.53
  -6   3  17    6.43    3.75
  -6   3  17    6.70    7.50
  -6   3  16   42.08    7.03
  -6   3  16   14.88    4.95
  -6  -3  15  -12.43   27.68
  -6   3  15    7.25    5.78
  -6   3  15    3.35    4.75
  -6   3  14   81.66    9.68
  -6   3  14   88.54    9.95
  -6  -3  13   19.20   17.55
  -6   3  13   16.35    5.53
  -6   3  13   25.78    5.35
  -6   3  12  170.08   15.53
  -6  -3  12  134.07   20.35
  -6   3  12  140.40   15.28
  -6   3  11   12.10    4.45
  -6  -3  11    4.63    4.35
  -6   3  11   18.78    4.93
  -6  -3  11    9.10   13.35
  -6  -3  10   15.53    4.73
  -6  -3  10    9.63   14.50
  -6   3  10   30.83    4.78
  -6  -3   9   -0.78   13.03
  -6  -3   9    2.28    3.65
   6  -3  -9    3.40    2.58
  -6  -3   9    4.35    3.23
  -6   3   9    5.48    4.25
  -6  -3   8    7.20    3.35
   6  -3  -8    8.63    2.53
  -6  -3   8   10.90   13.65
  -6   3   8    8.70    3.53
  -6  -3   8    7.70    2.95
  -6   3   8   10.20    4.08
  -6  -3   7   27.25   12.78
  -6   3   7   35.51    5.20
  -6  -3   7   13.35    4.10
  -6   3   7   26.25    4.15
  -6  -3   7   31.76    3.80
   6  -3  -7   30.21    3.53
  -6   3   6    7.20    5.35
  -6  -3   6    6.15    3.20
   6  -3  -6    6.93    2.20
  -6   3   6    6.73    2.88
  -6  -3   6    3.20    9.88
  -6  -3   6    5.08    2.50
  -6   3   6   11.35    3.33
   6  -3  -6    6.15    2.55
  -6  -3   6    1.68    2.93
  -6   3   5   23.93    3.98
  -6   3   5   40.61    5.40
  -6  -3   5   23.65    3.68
  -6   3   5   33.36    9.53
   6  -3  -5   27.63    3.50
  -6  -3   5   27.45    3.93
   6  -3  -5   26.28    3.33
  -6  -3   5   22.58    8.83
  -6  -3   4   36.03    7.68
  -6  -3   4   84.44    7.43
   6  -3  -4   73.71    8.05
   6  -3  -4   86.49    7.38
   6  -3  -4   74.39    7.25
  -6   3   4   52.21   16.65
  -6  -3   3   23.00    4.18
  -6  -3   3   31.16    3.78
  -6   3   3   27.20   13.88
  -6   3   3   33.86    4.18
   6  -3  -3   34.16    3.70
   6  -3  -3   28.90    3.60
   6  -3  -2   17.28    2.85
  -6   3   2    9.65   14.53
  -6  -3   2   21.98    3.40
  -6   3   2   19.20    3.63
   6  -3  -2   17.45    2.78
  -6  -3   1    5.15    2.80
  -6   3   1    3.43    3.45
   6  -3  -1    6.35    2.35
   6  -3  -1   -0.80    3.53
  -6  -3   0  216.59   20.45
  -6   3   0  229.99   20.75
   6  -3   0  206.81   20.38
  -6  -3  -1   54.56    5.85
  -6   3  -1   57.13    6.83
   6  -3   1   52.58    5.90
   6  -3   2  265.74   26.68
  -6  -3  -2  291.20   26.80
   6  -3   2  316.55   26.90
  -6  -3  -3   29.78    3.65
   6   3   3   25.60    3.80
   6  -3   3   29.38    3.65
   6  -3   3   31.91    4.40
   6  -3   4  465.30   46.38
   6  -3   4  523.31   46.53
   6  -3   4  524.99   46.58
   6  -3   5  128.47   13.93
   6  -3   5  153.33   14.08
   6  -3   5  166.58   14.38
   6   3   6   56.23    6.08
   6  -3   6   47.21    5.73
   6  -3   6   56.01    6.00
   6  -3   6   57.06    6.43
   6   3   7    6.28    2.73
   6  -3   7    7.30    2.70
   6  -3   7    6.65    2.85
   6  -3   7    8.60    3.80
   6   3   8   12.40    3.13
   6  -3   8   18.38    4.23
   6   3   9    2.75    2.40
   6  -3   9    2.63    3.78
   6   3  10   10.48    3.75
   6  -3  10   41.58    4.50
   6   3  11   10.20    2.98
   6   3  11    7.48    2.68
   6   3  12   17.68    2.58
   6   3  12   14.33    2.38
  -6   4  17    7.58    3.28
  -6   4  17   18.60    7.55
  -6   4  16   54.13    6.55
  -6   4  16   13.10    4.65
  -6   4  15   47.28    7.13
  -6   4  15   65.34    7.73
  -6   4  14   49.46    7.18
  -6   4  14   55.06    7.15
  -6   4  13   37.18    6.35
  -6   4  13   48.33    6.50
  -6   4  12   35.83    5.80
  -6   4  11    3.95    4.28
  -6  -4  11    0.75   13.88
  -6  -4  10   54.28   16.00
  -6   4  10   74.16    8.73
  -6   4  10   75.94    8.70
  -6  -4  10   48.16    8.90
  -6   4   9    2.45    4.55
  -6  -4   9    2.80    4.13
   6  -4  -9    5.58    2.83
  -6   4   9    6.60    4.23
  -6  -4   9   12.43   12.23
  -6   4   8  128.75   12.00
  -6   4   8  149.30   12.63
  -6  -4   8   60.66   11.98
   6  -4  -8  147.57   11.75
  -6  -4   8   91.52   15.83
  -6   4   7   -0.45    5.43
   6  -4  -7    1.03    2.48
  -6   4   7    0.18    3.28
  -6  -4   7   -1.58    2.43
  -6  -4   7   -8.68    9.03
   6  -4  -7    1.43    3.30
  -6  -4   7   -0.45    3.25
  -6   4   6  143.95   15.25
  -6  -4   6  141.90   15.03
   6  -4  -6  149.50   15.05
  -6   4   6  169.03   17.03
  -6  -4   6  100.32   17.33
   6  -4  -6  168.83   15.25
  -6   4   5   22.20   15.08
  -6  -4   5   11.33    3.63
   6  -4  -5   19.10    3.05
  -6  -4   5   12.58    2.93
  -6   4   5   13.53    3.68
   6  -4  -5   16.45    3.33
  -6  -4   5   30.26    3.83
  -6   4   4    8.23   16.85
   6  -4  -4    6.10    2.45
  -6  -4   4    6.98    3.15
   6  -4  -4    7.18    2.88
   6  -4  -3   20.23    3.38
  -6  -4   3   26.10    3.95
  -6   4   3   25.28    4.10
   6  -4  -3   22.25    3.70
  -6   4   3   21.88   15.90
   6   4  -2  135.65   11.98
  -6   4   2  125.47   12.48
   6  -4  -2  106.52   11.98
   6  -4  -2  118.22   12.15
  -6  -4   2  156.20   12.38
  -6  -4   1    3.60    2.80
   6   4  -1    4.50    2.08
  -6   4   1    3.83    3.75
   6  -4  -1    3.38    2.13
   6  -4  -1    3.70    2.98
   6   4   0   80.06    8.65
   6  -4   0   80.96    8.73
   6  -4   0   96.69    9.25
  -6  -4   0   95.22    8.93
  -6  -4  -1    3.63    2.55
   6   4   1    2.23    2.10
   6  -4   1    1.45    2.28
   6  -4   1    1.88    3.08
   6   4   2   77.11    8.08
   6  -4   2   76.19    8.08
   6  -4   2  105.42    8.73
  -6  -4  -2   80.29    8.05
   6   4   3  102.74   11.38
   6  -4   3  118.62   11.43
   6  -4   4   75.69    8.03
   6   4   4   73.44    8.00
   6  -4   4   91.99    8.68
   6  -4   5   17.60    3.43
   6  -4   5   19.85    3.50
   6  -4   5   18.78    4.33
   6  -4   6   28.53    3.95
   6  -4   6   29.40    3.90
   6  -4   6   32.41    4.88
   6   4   7   23.30    3.40
   6  -4   7   28.38    3.53
   6  -4   7   32.18    4.63
   6   4   8   19.65    3.20
   6   4   9   52.13    6.23
   6   4  10    8.38    3.08
   6   4  10    8.50    3.23
   6   4  11   51.11    5.48
   6   4  12    7.90    1.80
  -6   5  16    4.18    5.73
  -6   5  15   49.76    6.83
   6  -5 -15   60.99    6.13
  -6   5  15   54.66    7.43
  -6   5  14    5.70    4.65
  -6   5  13   81.36    9.10
  -6   5  12    5.35    4.38
  -6   5  12    0.05    4.13
  -6   5  11   38.03    5.95
   6  -5 -11   46.88    4.78
  -6   5  10    7.13    4.53
   6  -5 -10   11.30    3.05
  -6   5  10   11.83    4.18
  -6   5   9  257.54   22.38
   6  -5  -9  288.67   22.15
  -6   5   9  257.64   22.63
   6  -5  -8   21.73    3.85
  -6   5   8   19.90    4.45
  -6   5   8   21.58    6.50
   6  -5  -8   24.73    4.70
  -6  -5   8   25.98    4.48
  -6   5   7  232.79   25.70
   6  -5  -7  242.24   25.58
   6  -5  -7  289.15   25.80
  -6   5   7  236.56   27.03
  -6  -5   6    0.70    3.45
   6  -5  -6    2.50    2.80
  -6   5   6    4.53    3.50
  -6   5   6    2.83   14.73
  -6  -5   6    4.35    3.90
   6  -5  -6    2.73    3.55
  -6   5   5  138.15   14.83
   6  -5  -5  151.03   14.88
  -6  -5   5  140.20   14.85
   6  -5  -5  139.27   14.60
  -6  -5   4    0.05    3.00
   6  -5  -4   -1.43    2.98
   6  -5  -4   -2.08    3.55
  -6   5   3  314.80   31.18
   6  -5  -3  361.76   31.16
  -6  -5   3  317.28   31.03
   6   5  -2   26.03    3.43
  -6   5   2   30.91    4.80
   6  -5  -2   26.78    3.98
   6  -5  -2   28.85    4.50
  -6  -5   2   32.46    3.98
   6   5  -1  746.73   69.16
   6  -5  -1  696.47   69.19
   6  -5  -1  824.81   69.36
   6  -5  -1  698.24   69.24
  -6  -5   1  780.03   69.24
   6   5   0   90.34    9.63
   6  -5   0   93.27    9.78
   6  -5   0  123.62   10.45
   6  -5   0  117.52   10.38
  -6  -5   0   95.62    9.73
   6   5   1  709.32   69.69
   6  -5   1  775.45   69.81
   6  -5   1  886.10   70.04
  -6  -5  -1  715.74   69.69
   6   5   2    2.00    2.48
   6  -5   2    1.18    2.98
   6  -5   2    2.15    4.18
   6   5   3  193.13   20.28
   6  -5   3  213.79   20.40
   6   5   4   16.85    2.95
   6  -5   4   19.93    3.65
   6  -5   4   23.23    4.68
   6   5   5  128.72   13.53
   6  -5   5  148.70   13.80
   6  -5   5  152.88   13.73
   6  -5   6  127.97   10.05
   6  -5   6   82.34    9.75
   6  -5   7   38.51    4.65
   6   5   8   16.90    3.63
   6  -5   8   15.08    3.20
   6   5   9    1.48    2.90
   6   5   9   14.15    3.23
   6   5  10    6.03    2.43
   6   5  10    5.75    2.78
   6  -5  10    6.90    3.03
   6   5  11    3.83    1.75
   6   5  11    6.45    1.95
  -6   6  15    6.45    3.18
  -6   6  15   -0.05    5.90
   6  -6 -15    4.83    2.05
  -6   6  14   30.33    4.80
  -6   6  14   24.08    6.20
   6  -6 -14   38.11    4.15
  -6   6  13   -2.55    3.63
  -6   6  13    0.40    4.78
   6  -6 -13   -1.65    2.88
  -6   6  12   45.48    7.98
  -6   6  12   61.74    7.43
   6  -6 -12   66.46    7.15
   6  -6 -12   74.39    6.83
  -6   6  11    2.65    4.88
   6  -6 -11    5.25    2.70
  -6   6  11    2.78    3.85
   6  -6 -11    4.65    3.45
  -6   6  10  125.35   14.40
   6  -6 -10  155.58   14.43
  -6   6  10  127.20   15.08
   6  -6 -10  165.00   14.23
  -6   6   9    8.10    6.25
   6  -6  -9    6.85    2.98
  -6   6   9    1.45    3.58
   6  -6  -9    8.90    3.55
  -6   6   8  207.13   22.50
   6  -6  -8  245.64   22.43
   6  -6  -8  258.92   22.60
  -6  -6   7    8.15    4.53
   6  -6  -7    7.93    3.30
  -6   6   7    6.05    3.83
   6  -6  -7    7.35    4.00
  -6  -6   7    9.15    3.53
  -6   6   6   49.68    6.53
   6  -6  -6   46.06    6.10
   6  -6  -6   55.16    6.63
  -6  -6   6   71.36    6.83
  -6  -6   6   55.68    6.63
  -6  -6   5   13.73    3.70
  -6  -6   5   12.43    3.83
   6  -6  -5    9.28    3.48
   6  -6  -5   12.90    4.50
  -6   6   4   59.61    7.38
   6  -6  -4   74.36    7.60
  -6  -6   4   58.38    7.15
  -6  -6   4   61.59    6.93
   6  -6  -3   36.71    5.33
   6  -6  -3   28.35    4.48
  -6  -6   3   27.33    4.10
   6  -6  -2  193.23   17.85
   6  -6  -2  208.86   18.13
   6  -6  -2  179.83   17.85
  -6  -6   2  173.43   17.70
   6  -6  -1  161.45   15.58
   6  -6  -1  197.81   16.05
   6  -6  -1  157.68   15.63
  -6  -6   1  149.28   15.30
   6   6   0  158.48   16.20
   6  -6   0  178.85   16.53
   6  -6   0  234.84   17.15
   6  -6   0  213.34   16.88
  -6  -6   0  149.05   16.18
   6  -6   1    0.58    5.08
   6   6   1    2.23    2.18
   6  -6   1    0.45    3.38
   6   6   2  196.91   20.03
   6  -6   2  241.07   20.33
   6   6   3   36.43    4.40
   6  -6   3   43.88    5.05
   6  -6   4  399.79   37.56
   6  -6   5   26.38    3.70
   6  -6   5   30.41    4.30
   6  -6   6  317.48   30.43
   6  -6   6  331.13   30.61
   6   6   7   26.35    3.78
   6  -6   7   28.05    3.98
   6  -6   7   27.48    4.53
   6   6   8   78.21    7.55
   6  -6   8   75.64    7.50
   6  -6   8   62.06    7.65
   6   6   8   70.44    7.25
   6   6   9   12.45    2.35
   6  -6   9    9.43    2.98
   6   6  10    3.28    1.53
   6  -6  10    3.25    2.40
   6   6  11    6.98    1.60
  -6   7  15   10.90    2.25
   6  -7 -14    9.18    2.05
  -6   7  13   11.93    3.18
   6  -7 -13   13.93    2.60
   6  -7 -12   12.13    2.48
  -6   7  12    7.28    3.30
   6  -7 -12   11.10    2.83
  -6   7  11   48.63    6.60
   6  -7 -11   63.14    6.58
   6  -7 -11   65.19    6.35
  -6   7  10   12.30    3.70
   6  -7 -10   12.58    3.60
   6  -7 -10   18.53    3.23
  -6   7   9   88.91   10.18
   6  -7  -9  106.64   10.35
   6  -7  -9  107.22   10.08
   6  -7  -8   13.98    3.30
  -6   7   8    8.60    3.55
   6  -7  -8   13.05    3.88
   6  -7  -7    7.58    3.20
  -6   7   7    4.68    3.43
   6  -7  -7   10.05    3.85
  -6  -7   7    5.63    3.13
   6  -7  -6    0.65    3.20
   6  -7  -6   -1.55    3.90
  -6  -7   6    2.08    3.05
  -6  -7   5   31.36    4.88
   6  -7  -5   28.75    5.10
  -6  -7   5   30.66    4.73
  -6  -7   4    2.30    3.15
  -6  -7   4   -0.60    3.58
   6  -7  -4   -1.73    4.30
   6  -7  -3  163.65   14.98
   6  -7  -3  152.83   15.20
  -6  -7   3  148.72   14.85
   6  -7  -3  150.73   15.00
  -6  -7   2   11.35    2.78
   6  -7  -2    9.78    3.70
   6  -7  -2   12.28    3.58
   6  -7  -1  501.73   44.48
   6  -7  -1  494.58   44.48
  -6  -7   1  448.05   44.26
   6  -7   0   10.15    3.60
   6  -7   0   10.48    4.15
   6  -7   1   15.53    3.80
   6  -7   2    6.73    3.30
   6  -7   3    9.75    3.43
   6  -7   3   11.90    4.45
   6  -7   4    5.10    3.43
   6  -7   4    6.48    3.80
   6  -7   5   19.23    3.75
   6  -7   5   16.78    4.00
   6  -7   6   27.03    3.90
   6  -7   6   20.80    3.93
   6   7   6   22.38    2.93
   6   7   7   66.71    6.08
   6  -7   7   66.34    6.23
   6   7   7   56.58    5.83
   6   7   8   89.06    6.93
   6  -7   8   91.84    7.05
   6   7   9    3.05    1.18
   6   7   9    4.70    1.70
   6  -7   9    1.63    2.15
   6   7  10   30.66    3.25
  -6   8  13    8.18    2.08
   6  -8 -13   11.20    1.93
   6  -8 -12    0.60    1.73
   6  -8 -12   -0.05    1.98
   6  -8 -11   13.03    2.43
   6  -8 -11   10.00    2.58
   6  -8 -10    8.75    2.75
   6  -8 -10   10.53    2.83
   6  -8  -9    0.08    2.65
   6  -8  -9   -0.90    3.00
   6  -8  -8   19.40    3.65
   6  -8  -8   21.65    3.95
   6  -8  -7   -2.50    3.20
   6  -8  -7   -2.25    3.63
  -6  -8   7   -2.80    2.88
   6  -8  -6    0.55    3.25
  -6  -8   6   -1.15    3.08
   6  -8  -5    0.68    3.18
  -6  -8   5    1.18    3.75
   6  -8  -4    7.05    3.48
   6  -8  -4    4.53    3.35
  -6  -8   4    6.53    4.20
  -6  -8   3    1.50    4.18
   6  -8  -3    4.78    3.30
   6  -8  -3    3.55    3.38
  -6  -8   2   43.16    6.90
   6  -8  -2   54.11    6.03
   6  -8  -2   50.06    6.03
   6  -8  -1   14.68    3.83
   6  -8  -1   11.68    3.58
   6  -8  -1   12.55    4.60
   6  -8   0  127.57   14.10
   6  -8   0  144.45   14.38
   6  -8   0  168.18   14.65
   6  -8   1    6.80    3.55
   6  -8   1    8.90    4.03
   6  -8   2   11.15    3.35
   6  -8   2   12.23    4.30
   6  -8   3   22.83    4.15
   6  -8   3   29.20    4.60
   6  -8   4   13.70    3.48
   6  -8   4   17.38    3.70
   6   8   5   44.43    4.43
   6  -8   5   44.33    5.08
   6   8   6   -0.88    1.80
   6  -8   6    1.10    2.55
   6  -8   6   -0.43    2.45
   6   8   7   48.76    4.33
   6  -8   7   53.63    4.65
   6   8   8    1.80    1.30
   6  -8   8    0.40    1.80
   6  -9 -12    0.85    1.33
   6  -9 -11   11.55    1.88
   6  -9 -11    7.95    1.95
   6  -9 -10   15.75    2.93
   6  -9 -10   23.88    2.78
   6  -9  -9   31.01    3.80
   6  -9  -8   27.25    3.73
   6  -9  -7    5.80    2.83
   6  -9  -7    5.48    2.58
   6  -9  -6    8.93    2.80
  -6  -9   6    7.75    3.23
   6  -9  -5   33.76    4.38
   6  -9  -5   33.76    4.28
  -6  -9   5   25.65    4.80
   6  -9  -4    0.38    2.93
   6  -9  -4   -0.03    2.93
   6  -9  -4   -0.95    3.33
  -6  -9   4    0.53    3.93
   6  -9  -3   11.15    3.18
   6  -9  -3    9.00    3.33
   6  -9  -3    8.78    3.73
  -6  -9   2    4.53    4.28
   6  -9  -2    9.30    3.45
   6  -9  -2    9.45    3.20
   6  -9  -2    7.85    4.13
   6  -9  -1   33.13    5.10
   6  -9  -1   40.43    5.35
   6  -9  -1   48.98    5.90
   6  -9   0   25.70    4.43
   6  -9   0   30.56    4.63
   6  -9   1    4.20    3.10
   6  -9   1    8.08    3.70
   6  -9   2   95.04   10.18
   6  -9   2  109.94   10.35
   6  -9   3    6.08    2.90
   6  -9   3    8.35    3.03
   6  -9   4   18.38    3.25
   6  -9   4   17.48    3.13
   6   9   5   10.78    1.60
   6  -9   5   11.33    2.65
   6  -9   5   12.68    2.48
   6   9   6   15.10    1.83
   6  -9   6   11.65    2.43
   6  -9   7    3.33    1.60
   6  -9   7    3.00    1.43
   6 -10 -10   13.80    1.98
   6 -10 -10   22.35    2.15
   6 -10  -9    1.53    1.50
   6 -10  -9    1.68    1.33
   6 -10  -8   25.03    3.15
   6 -10  -8   29.10    3.28
   6 -10  -8   30.66    3.25
   6 -10  -7    6.13    1.93
   6 -10  -7    6.58    2.10
   6 -10  -6   29.43    3.70
   6 -10  -6   31.58    3.90
   6 -10  -6   31.83    3.70
   6 -10  -5    3.40    2.30
   6 -10  -5    4.43    2.23
   6 -10  -5    3.05    2.53
   6 -10  -4   37.18    4.18
   6 -10  -4   42.96    4.60
   6 -10  -4   38.63    4.28
   6 -10  -3    3.60    2.88
   6 -10  -3    0.20    2.60
   6 -10  -3    0.53    2.80
  -6 -10   3    1.08    2.98
   6 -10  -2   64.96    7.43
   6 -10  -2   69.21    7.45
   6 -10  -2   86.06    7.75
   6 -10  -1   -1.75    2.75
   6 -10  -1    1.08    2.73
   6 -10   0   42.26    5.00
   6 -10   0   47.01    5.18
   6 -10   1    1.80    2.43
   6 -10   1    1.00    2.53
  -6 -10  -1    3.63    2.90
  -6 -10  -2   18.05    3.00
   6 -10   2   12.38    2.78
   6 -10   2   14.43    2.68
   6 -10   3   25.35    3.48
   6 -10   3   25.45    3.35
  -6 -10  -3   30.61    3.53
   6 -10   4   19.08    2.78
   6 -10   4   17.28    2.58
  -6 -10  -4   26.15    2.75
  -6 -10  -5    8.65    1.55
   6 -10   5    5.15    1.65
   6 -11  -7   19.15    2.18
   6 -11  -7   11.68    1.80
   6 -11  -6    4.55    1.90
   6 -11  -6    3.38    1.38
   6 -11  -6    4.88    1.40
   6 -11  -5   34.83    4.18
   6 -11  -5   39.43    4.18
   6 -11  -4   -0.08    1.65
   6 -11  -4   -2.60    1.60
   6 -11  -3   60.91    6.23
   6 -11  -3   64.49    6.23
   6 -11  -2    0.95    1.63
   6 -11  -2    1.20    1.65
   6 -11  -1   45.51    5.23
   6 -11  -1   52.23    5.28
  -6 -11   1   61.46    5.45
   6 -11   0    2.25    1.65
   6 -11   0    0.63    1.50
  -6 -11   0   -0.18    1.78
   6 -11   1   21.88    2.85
   6 -11   1   22.05    2.68
  -6 -11  -1   30.21    2.95
   6 -11   2   -0.13    1.30
  -6 -11  -2    0.50    1.25
  -7   0  17   14.03   32.23
  -7   0  16   86.39   23.08
  -7   0  15    2.33   13.08
  -7   0  15   -2.33    5.08
  -7   0  14   42.63    7.68
  -7   0  14  105.67   12.45
  -7   0  13    0.08    8.33
  -7   0  13   -1.15    5.15
  -7   0  12   55.38    9.90
  -7   0  12   50.58    7.35
  -7   0  11    1.68    7.20
  -7   0  11    1.20    2.75
  -7   0  11   -2.45    4.95
  -7   0  10    3.83    7.95
  -7   0  10    3.58    3.08
  -7   0  10    5.58    4.68
  -7   0   9   -1.35    7.58
  -7   0   9   -1.30    3.30
  -7   0   9   -1.08    4.10
  -7   0   8  280.72   32.38
  -7   0   8  453.78   32.78
  -7   0   7   -0.98    2.93
  -7   0   7    4.25    3.35
  -7   0   6  635.76   59.28
  -7   0   6  630.26   58.98
  -7   0   5    2.65    3.30
  -7   0   5   -2.08    2.85
  -7   0   4  989.57   85.76
  -7   0   4  778.16   86.46
  -7   0   3   -6.38   11.25
  -7   0   3    0.60    4.78
  -7   0   2  429.55   40.23
  -7   0   1    3.80    3.33
   7   0  -1    0.63    1.90
   7   0   0  417.74   38.98
   7   0   1    0.60    2.03
   7   0   1    0.73    1.65
   7   0   2  259.32   24.30
   7   0   3    1.03    2.73
   7   0   3    1.70    2.15
   7   0   4  140.57   12.53
   7   0   4  119.19   12.23
   7   0   5    0.10    2.75
   7   0   5   -1.25    2.40
   7   0   6   49.13    5.43
  -7   0  -7   -0.68    2.35
   7   0   7   -4.10    3.05
   7   0   8    8.63    3.10
   7   0   9   -0.08    2.83
   7   0   9    1.58    2.50
   7   0  10    0.25    2.40
   7   0  10    3.20    1.75
   7   0  11   -0.13    1.50
  -7   1  18    1.40   25.78
  -7  -1  17   21.78   36.81
  -7   1  17   12.18   22.78
  -7  -1  16  -16.68   32.33
  -7   1  16    5.53   13.88
  -7   1  16   -3.00    4.73
  -7  -1  15   22.33   21.55
  -7   1  15   42.21    7.80
  -7  -1  14   -2.70   13.95
  -7   1  14    0.08    8.80
  -7  -1  14    1.53    4.75
  -7  -1  13   70.34   13.55
  -7  -1  13   56.48    8.05
  -7   1  13   74.34   10.48
  -7  -1  12    0.43   10.40
  -7  -1  12   -0.18    3.20
  -7  -1  12    0.80    4.53
  -7  -1  11   60.44   11.15
  -7  -1  11   60.21    6.90
  -7  -1  11   39.43    5.83
  -7  -1  10    0.08    9.60
  -7  -1  10    0.80    3.40
  -7  -1  10    2.33    4.50
  -7  -1   9  206.36   27.55
  -7  -1   9  249.59   25.45
  -7  -1   9  316.00   25.55
  -7   1   9  256.34   25.40
  -7  -1   8    8.08   13.50
  -7   1   8    9.53    7.53
  -7  -1   8   12.28    3.50
  -7   1   8   15.65    3.63
  -7  -1   8    6.90    3.83
  -7  -1   7  835.09   59.69
  -7   1   7  727.10   59.51
  -7  -1   7  627.56   59.18
  -7   1   7  576.55   59.21
  -7  -1   7  342.76   61.24
  -7   1   7  504.88   60.24
  -7  -1   6   -2.43   12.38
  -7  -1   6    0.05    3.60
  -7   1   6    1.65    2.85
  -7  -1   6    3.10    3.05
  -7   1   6   11.63   13.15
  -7  -1   5  473.13   45.08
  -7   1   5  381.91   44.91
  -7  -1   5  485.98   44.68
   7   1  -5  542.84   44.53
  -7  -1   5  338.43   46.11
  -7   1   5  306.83   47.01
  -7  -1   4    9.65    4.30
  -7   1   4   11.63    4.68
  -7  -1   4   11.63    3.05
  -7   1   4    6.68    3.20
   7   1  -4    9.83    2.08
  -7  -1   4    0.15    9.53
  -7   1   4    1.55   11.83
  -7   1   3  304.23   28.23
  -7  -1   3  292.47   27.10
  -7   1   3  272.02   27.10
   7   1  -3  294.80   26.88
  -7   1   3  227.69   29.83
  -7   1   2   44.33    5.25
   7   1  -2   43.28    4.38
  -7   1   1   61.19    6.75
   7   1  -1   56.46    5.78
   7  -1  -1   61.16    5.75
  -7  -1   0  361.11   29.53
  -7   1   0  370.31   29.30
   7   1   0  284.52   28.83
   7  -1   0  296.27   28.83
   7   1   1  129.60   12.53
   7  -1   1  119.02   12.40
   7   1   2  200.71   18.98
   7  -1   2  183.83   18.88
   7  -1   3   56.08    6.38
   7   1   3   58.91    6.05
   7  -1   3   56.33    6.15
  -7  -1  -4  141.15   12.65
   7   1   4  123.62   12.40
   7  -1   4  126.67   12.45
   7   1   4  123.95   12.25
   7  -1   4  126.47   12.33
  -7  -1  -5    1.13    2.70
   7  -1   5    0.53    3.15
   7   1   5    0.28    2.35
   7  -1   5    0.03    2.55
  -7  -1  -6    1.20    2.15
   7   1   6    4.60    3.00
   7  -1   6    2.85    2.90
   7  -1   6    3.85    2.65
   7   1   7    6.85    3.10
   7  -1   7    6.18    2.80
   7   1   8   74.86    7.93
   7  -1   8   80.86    7.98
   7  -1   8   73.41    7.83
   7  -1   9   -1.28    2.18
   7   1   9    2.23    3.03
   7   1   9   -1.58    2.48
   7  -1   9    0.93    2.43
   7  -1  10   17.00    2.75
   7   1  10    9.05    3.23
   7   1  10    9.45    2.80
   7   1  11   -0.23    1.78
  -7   2  17   -4.88   16.68
  -7   2  17    0.90    3.50
  -7  -2  16   13.68   31.83
  -7   2  16    7.30    4.65
  -7  -2  15    6.13   30.48
  -7  -2  14   21.18   25.08
  -7  -2  13    1.08   20.10
  -7   2  13    0.08    6.95
  -7   2  13    0.05    5.18
  -7  -2  12    1.25   16.10
  -7   2  12    9.43    6.55
  -7  -2  12    3.83    3.68
  -7   2  12    5.73    4.88
  -7  -2  12    5.68    4.10
  -7  -2  11   13.23   15.90
  -7   2  11    5.80    6.40
  -7  -2  11    1.50    3.50
  -7   2  11    1.13    4.90
  -7  -2  11   -6.75    3.90
  -7   2  10   60.49    9.00
  -7   2  10   64.89    7.68
  -7  -2  10   67.76    7.20
  -7  -2  10   51.63    7.03
  -7  -2  10   47.61   18.13
  -7  -2   9    8.25   16.15
  -7   2   9    7.58    6.58
  -7  -2   9    5.85    3.40
  -7  -2   9    8.73    3.85
  -7   2   8   63.86    6.73
  -7  -2   8   25.43   16.40
  -7   2   8   45.56    9.53
  -7  -2   8   43.96    6.55
   7  -2  -8   81.09    6.75
  -7  -2   8   46.11    6.88
  -7  -2   7    2.40   13.08
  -7   2   7   19.45    9.58
  -7  -2   7   14.70    4.40
  -7   2   7   30.91    4.13
  -7  -2   7   11.63    3.93
   7  -2  -7   35.21    4.30
  -7   2   6   82.51   20.88
  -7   2   6  145.62   15.73
  -7  -2   6  161.55   15.45
  -7   2   6  149.48   15.55
   7  -2  -6  155.08   15.13
  -7  -2   6   97.82   18.53
  -7  -2   6  130.60   15.85
  -7   2   5   75.99   18.53
  -7   2   5  103.72   12.00
  -7  -2   5   78.21   11.83
  -7  -2   5  117.79   11.45
  -7   2   5  114.67   11.58
   7  -2  -5  114.07   11.13
  -7  -2   5   82.06   14.90
  -7   2   4  159.23   14.63
  -7  -2   4  134.22   13.05
   7   2  -4  151.55   12.80
  -7   2   4  121.70   13.10
   7  -2  -4  124.65   12.73
  -7  -2   3    1.93    3.90
  -7  -2   3    6.40    2.88
  -7   2   3    5.88    3.25
   7   2  -3    7.28    1.90
   7  -2  -3    6.93    2.05
  -7   2   3    2.15   13.55
  -7  -2   2    5.63    4.00
  -7  -2   2   14.33    3.48
  -7   2   2   13.90    3.73
   7   2  -2   15.00    2.45
   7  -2  -2   13.98    2.50
  -7  -2   1  266.27   27.25
  -7   2   1  315.80   27.25
   7   2  -1  291.42   26.88
   7  -2  -1  279.97   26.85
  -7  -2   0   14.70    3.93
  -7   2   0   12.48    4.43
   7   2   0    8.95    2.38
   7  -2   0   10.70    2.53
  -7  -2  -1  649.86   50.71
   7   2   1  489.41   50.43
   7  -2   1  540.72   50.48
  -7  -2  -2   -0.80    3.23
   7   2   2    0.68    2.35
   7  -2   2   -0.03    2.48
   7  -2   2   -0.50    2.45
  -7  -2  -3  556.64   52.86
   7  -2   3  576.10   52.88
   7  -2   3  567.17   52.83
  -7  -2  -4    3.18    2.60
   7  -2   4    3.95    2.88
   7  -2   4    2.80    2.70
  -7  -2  -5   14.38    2.70
   7   2   5   17.55    3.53
   7  -2   5   17.90    3.48
   7  -2   5   15.65    3.38
   7   2   6    2.75    2.93
   7  -2   6   -0.98    2.83
   7  -2   6   -1.00    2.83
   7   2   7  197.93   19.15
   7  -2   7  203.48   19.15
   7  -2   8    0.15    2.15
   7   2   8   -0.70    2.63
   7  -2   8   -0.20    2.68
   7  -2   8    0.03    3.08
   7   2   9  173.93   11.48
   7   2   9  131.57   11.83
   7   2  10   10.58    2.83
   7   2  10    6.00    2.38
   7   2  11  100.02    9.68
  -7   3  17    0.70   14.70
  -7   3  17    2.90    3.20
  -7   3  16   -0.68    9.43
  -7   3  16    0.43    4.13
  -7   3  15   18.08    8.08
  -7  -3  15    4.03   21.13
  -7  -3  14    4.60   22.25
  -7   3  14   -9.33    7.18
  -7   3  14    0.73    5.20
  -7   3  13    2.40    6.73
  -7  -3  13   -6.40   20.48
  -7   3  13    0.20    5.18
  -7   3  12    5.10    6.13
  -7   3  12   -2.48    4.65
  -7  -3  12  -11.35   18.33
   7  -3 -12   -2.50    2.73
  -7  -3  11    0.15   17.03
  -7   3  11    3.83    5.88
  -7  -3  11   -3.18    3.98
   7  -3 -11    0.65    2.63
  -7  -3  10   16.13   15.93
  -7   3  10   18.88    6.55
  -7  -3  10   20.93    4.53
  -7  -3  10   13.13    3.88
   7  -3 -10   11.95    3.25
  -7  -3   9    4.88   14.35
  -7   3   9   22.55    7.45
   7  -3  -9   23.75    3.55
  -7  -3   9   13.90    4.30
  -7   3   9   19.58    4.98
  -7  -3   9   20.40    4.00
   7  -3  -9   19.03    3.43
  -7  -3   8   17.53   11.45
  -7   3   8   17.05    8.23
   7  -3  -8   18.13    3.28
  -7  -3   8   11.10    4.00
  -7   3   8   20.98    4.75
  -7  -3   8   19.43    3.68
   7  -3  -8   13.63    3.00
  -7   3   7   26.63   12.45
   7  -3  -7   20.88    3.38
  -7  -3   7   16.65    4.50
  -7   3   7   28.90    4.30
  -7  -3   7   22.00    3.68
   7  -3  -7   17.80    3.18
  -7  -3   7   17.85   10.58
  -7   3   6   56.58    5.63
  -7  -3   6   22.73    9.93
  -7   3   6   22.65   16.78
  -7  -3   6   34.78    4.65
   7  -3  -6   31.83    4.25
   7  -3  -6   37.28    4.40
  -7   3   5   -2.30   15.98
   7  -3  -5    0.90    2.68
  -7   3   5   -4.73    4.75
  -7  -3   5   -2.38    2.83
  -7   3   5   -0.03    3.60
   7  -3  -5    0.63    2.30
  -7  -3   4  565.94   51.08
  -7   3   4  588.30   51.18
   7  -3  -4  554.62   50.93
   7  -3  -4  683.54   51.13
  -7   3   4  415.94   53.68
  -7  -3   4  333.71   51.18
  -7   3   3   56.68    6.48
   7  -3  -3   58.31    5.73
   7  -3  -3   76.11    6.55
  -7  -3   2  406.64   38.63
  -7   3   2  400.54   38.58
   7  -3  -2  418.65   38.36
  -7  -3   1   25.98    4.20
  -7   3   1   16.43    4.43
   7  -3  -1   17.93    3.25
  -7  -3   0  511.69   43.18
  -7   3   0  480.03   43.31
   7  -3   0  420.00   42.96
  -7  -3  -1   13.60    3.48
   7  -3   1   12.55    3.15
  -7  -3  -2  170.13   17.05
   7  -3   2  188.51   17.15
  -7  -3  -3  100.62   10.43
   7   3   3  111.37   10.53
   7  -3   3  103.57   10.55
   7  -3   3  112.19   10.63
   7  -3   4   11.38    3.03
   7  -3   4   10.28    3.18
   7  -3   5    1.80    2.45
   7  -3   5   -0.23    2.93
   7   3   6   86.11    9.65
   7  -3   6  110.04    9.78
   7  -3   6   94.92    9.85
   7   3   7   10.08    2.80
   7  -3   7    7.80    2.63
   7  -3   7   11.30    3.35
   7   3   8  111.39   10.40
   7  -3   8   82.16   10.38
   7  -3   9    7.60    3.03
   7   3  10  141.05   13.83
   7   3  10  148.50   13.93
   7   3  11   -0.05    1.70
   7   3  11    1.38    1.43
  -7   4  17    4.58   10.58
  -7   4  16   28.03   11.13
  -7   4  16   15.10    4.05
  -7   4  15    2.55    7.95
  -7   4  14   40.48    8.45
  -7   4  14   45.21    6.38
  -7   4  13    8.23    6.48
   7  -4 -13   14.03    3.13
  -7   4  12   11.00    6.13
   7  -4 -12    8.38    3.05
  -7  -4  12    1.23   12.48
  -7   4  11   13.25    6.33
  -7  -4  11   17.23    4.83
  -7   4  11   17.08    5.03
   7  -4 -11   20.23    3.45
  -7  -4  11   13.60   11.43
  -7   4  10   87.74    9.68
   7  -4 -10   81.76    9.00
  -7   4  10   72.84   10.78
  -7  -4  10   71.56    9.65
  -7  -4  10   54.16   13.70
  -7   4   9    6.45    7.83
   7  -4  -9   -0.40    2.70
  -7  -4   9    1.40    3.93
  -7   4   9   -0.38    4.43
   7  -4  -9   -1.05    2.83
  -7  -4   9    0.88    9.93
  -7   4   8   89.99   14.48
  -7   4   8   85.89    9.20
  -7  -4   8   87.51    8.45
   7  -4  -8   86.81    8.48
   7  -4  -8  100.27    8.53
  -7  -4   8   68.04   12.90
   7  -4  -7    4.55    2.93
  -7  -4   7    5.83    2.88
   7  -4  -7    5.60    3.03
  -7  -4   7    4.70    3.15
  -7   4   7   16.25   16.33
  -7   4   6   35.38   20.08
  -7   4   6   85.09    8.63
   7  -4  -6   66.99    7.73
  -7  -4   6  106.94    8.40
   7  -4  -6   62.64    7.68
  -7   4   5   44.63   17.60
  -7   4   5  128.67   10.63
  -7  -4   5   35.33    8.85
  -7   4   5   75.26    8.98
   7  -4  -5   82.06    8.53
   7  -4  -5   82.34    8.55
  -7  -4   5  151.30    9.25
  -7   4   4   87.06    9.15
   7  -4  -4   88.76    8.70
   7  -4  -4   95.69    8.80
  -7  -4   4   72.21    9.05
  -7   4   4   61.46   17.78
   7   4  -3  264.59   22.95
  -7   4   3  219.11   23.20
   7  -4  -3  221.11   22.98
   7  -4  -3  240.62   23.10
  -7  -4   3  275.52   23.30
   7   4  -2   60.41    6.25
  -7  -4   2   68.84    6.98
  -7   4   2   57.61    7.20
   7  -4  -2   55.06    6.53
  -7  -4   1   16.30    3.78
   7   4  -1   12.50    2.75
  -7   4   1   17.80    4.65
   7  -4  -1   14.40    3.60
  -7  -4   0   10.48    3.38
   7   4   0    7.58    2.75
  -7   4   0   10.25    4.40
   7  -4   0    8.83    3.20
  -7  -4  -1    0.70    2.90
   7   4   1   -0.78    2.63
   7  -4   1   -1.33    3.35
  -7  -4  -2    1.85    2.58
   7   4   2    2.10    2.75
   7  -4   2    3.95    3.50
   7   4   3  120.42   12.23
   7  -4   3  134.75   12.50
   7   4   4  396.09   39.66
   7  -4   4  436.97   39.78
   7  -4   4  450.85   39.83
   7  -4   5  299.20   31.23
   7  -4   5  365.54   31.46
   7  -4   5  374.46   31.56
   7  -4   6   70.89    7.63
   7  -4   6   78.39    7.95
   7   4   7  167.25   16.18
   7  -4   7  151.33   16.20
   7  -4   8    6.40    3.05
   7   4   9   74.61    7.68
   7  -4   9   85.39    7.75
   7   4   9   64.39    7.53
   7   4  10    0.35    2.18
  -7   5  16    3.75    8.15
  -7   5  16    4.05    2.88
  -7   5  15    2.48    9.18
  -7   5  14   12.90    8.43
   7  -5 -14   15.65    2.75
  -7   5  13   97.24    9.98
   7  -5 -13   93.14    9.25
  -7   5  13   78.46   12.35
  -7   5  12   -2.28    7.23
  -7   5  12   -1.95    4.20
   7  -5 -12   -5.30    2.98
  -7   5  11  215.14   22.00
   7  -5 -11  218.31   21.65
   7  -5 -11  258.02   21.63
  -7   5  11  170.48   23.10
  -7   5  10    2.23    8.55
  -7  -5  10    5.90    4.33
   7  -5 -10    9.10    2.83
  -7   5  10    4.90    3.85
   7  -5 -10    6.45    3.08
  -7   5   9  190.18   18.03
   7  -5  -9  203.93   17.73
  -7   5   9  127.92   21.10
   7  -5  -9  229.44   17.73
  -7  -5   9  103.02   17.93
  -7   5   8    3.13   14.83
   7  -5  -8    4.25    3.00
  -7   5   8    0.80    3.90
   7  -5  -8    3.88    3.08
   7  -5  -7  236.71   23.85
   7  -5  -7  226.84   23.80
  -7   5   6    5.80   14.65
   7  -5  -6    3.93    3.23
  -7  -5   6    2.98    3.75
  -7   5   6    8.23    4.23
   7  -5  -6    6.73    3.53
  -7  -5   6    4.13    3.60
  -7   5   5  153.45   26.40
  -7   5   5  268.27   26.23
   7  -5  -5  311.38   26.10
   7  -5  -5  289.82   26.03
  -7  -5   5  373.54   26.45
  -7   5   5  174.40   29.78
  -7  -5   5  261.84   26.15
   7  -5  -4   28.05    4.45
  -7   5   4   32.43    5.10
   7  -5  -4   28.80    3.78
   7  -5  -4   26.45    4.45
  -7  -5   4   31.91    4.58
  -7   5   3  390.04   38.56
   7  -5  -3  386.49   38.26
   7  -5  -3  435.50   38.46
   7  -5  -3  388.94   38.41
  -7  -5   3  471.95   38.53
  -7  -5   2    3.28    3.13
   7   5  -2    2.13    2.28
  -7   5   2    1.03    4.10
   7  -5  -2   -0.25    2.33
   7  -5  -2   -0.08    3.78
   7  -5  -1    4.28    4.83
  -7  -5   1    7.73    2.93
   7   5  -1    6.38    2.45
   7  -5  -1    2.83    2.55
   7  -5  -1    2.78    3.80
   7   5   0   53.93    5.98
   7  -5   0   54.91    5.95
   7  -5   0   69.01    6.73
  -7  -5   0   53.53    6.05
  -7  -5  -1    1.10    2.23
   7   5   1    2.80    2.43
   7  -5   1    1.25    2.38
   7  -5   1    6.45    3.85
   7   5   2  292.00   28.83
   7  -5   2  288.27   28.85
   7   5   3   75.46    8.38
   7  -5   3   85.09    8.45
   7  -5   3  103.97    9.03
   7   5   4  146.92   16.18
   7  -5   4  167.68   16.20
   7  -5   4  184.18   16.43
   7  -5   4  211.54   16.70
   7   5   5   38.01    4.73
   7  -5   5   40.08    4.75
   7  -5   5   46.81    4.88
   7  -5   5   54.23    5.55
   7  -5   6   28.83    3.50
   7  -5   6   20.60    3.30
   7  -5   6   28.78    4.20
   7  -5   7    2.80    3.00
   7   5   8    8.98    2.45
   7  -5   8    9.93    3.10
   7   5   9    8.30    2.20
   7   5   9    6.03    2.38
   7   5  10    0.73    1.38
   7   5  10   -0.65    1.58
  -7   6  15    2.35    2.58
  -7   6  14   14.50    8.85
   7  -6 -14   52.96    5.15
  -7   6  13    3.05    9.68
   7  -6 -13   11.48    2.53
  -7   6  12   39.36   14.95
   7  -6 -12  125.87   11.38
   7  -6 -11    2.43    2.58
  -7   6  11    2.15    3.88
   7  -6 -11    0.93    2.75
  -7   6  10  294.70   30.26
   7  -6 -10  323.83   30.13
   7  -6 -10  371.14   30.13
   7  -6  -9    3.88    2.83
  -7   6   9    9.45   12.25
   7  -6  -9    5.45    3.13
   7  -6  -8  113.99    9.23
   7  -6  -8  107.14    9.10
  -7  -6   7    0.98    3.93
   7  -6  -7    0.28    3.00
  -7   6   7   -3.73    3.63
   7  -6  -7   -1.80    3.25
  -7  -6   7   -1.73    2.83
  -7  -6   6   -0.20    3.58
   7  -6  -6   -0.78    2.98
  -7   6   6    0.38    3.65
   7  -6  -6    0.13    3.33
  -7  -6   6   -0.55    2.95
  -7  -6   5    2.00    2.90
   7  -6  -5   -0.08    3.00
  -7  -6   5    2.48    3.33
  -7   6   5    2.53    3.65
   7  -6  -5    0.83    2.55
   7  -6  -5    1.58    3.43
  -7  -6   4    8.28    3.30
   7  -6  -4   11.23    3.35
  -7  -6   4   11.85    3.35
  -7   6   4   11.40    3.90
   7  -6  -4   11.23    2.85
   7  -6  -4   15.73    3.70
  -7  -6   3    3.05    2.93
   7  -6  -3    5.05    2.68
   7  -6  -3    7.28    3.68
   7  -6  -2  425.27   44.38
   7  -6  -2  546.42   44.71
   7  -6  -2  527.91   44.66
  -7  -6   2  461.38   44.43
   7  -6  -1  127.75   13.18
   7  -6  -1  153.73   13.68
  -7  -6   1  120.97   13.05
   7   6   0  235.74   22.55
   7  -6   0  250.72   22.68
   7  -6   0  299.10   23.00
  -7  -6   0  214.19   22.50
   7   6   1   -0.55    2.00
   7  -6   1    1.28    2.35
   7  -6   1    2.30    3.98
   7   6   2  133.02   13.88
   7  -6   2  146.32   14.03
   7  -6   2  180.16   14.53
   7  -6   3   17.18    3.18
   7  -6   3   19.20    4.30
   7  -6   4   36.16    4.55
   7  -6   4   39.13    4.58
   7  -6   4   44.06    5.35
   7  -6   5    2.55    2.35
   7  -6   5    1.03    2.05
   7  -6   6   23.15    3.15
   7   6   7   19.25    2.70
   7   6   8    0.40    1.75
   7   6   9    6.83    1.45
  -7   7  14   -0.08    1.93
   7  -7 -14    0.35    1.33
  -7   7  13   11.73    2.88
   7  -7 -13   18.73    2.50
  -7   7  12   -2.95    2.73
   7  -7 -12   -0.43    2.15
   7  -7 -11   54.26    6.48
   7  -7 -11   68.04    6.38
   7  -7 -10    6.15    2.55
   7  -7 -10    6.83    2.90
  -7   7   9  107.64   12.70
   7  -7  -9  140.80   12.70
   7  -7  -9  138.25   12.60
  -7   7   8   36.98    5.53
   7  -7  -8   49.51    5.65
   7  -7  -8   51.23    5.43
   7  -7  -7    4.45    3.08
  -7   7   7    0.53    3.20
   7  -7  -7   -1.13    3.55
  -7  -7   7    2.00    2.53
  -7   7   6   62.69    7.55
   7  -7  -6   75.41    7.30
   7  -7  -6   82.76    7.75
  -7  -7   6   50.18    7.50
   7  -7  -6   73.81    7.53
  -7  -7   6   87.29    8.05
  -7  -7   5   23.68    3.98
   7  -7  -5   17.50    3.75
   7  -7  -5   13.88    3.23
   7  -7  -5   18.43    3.93
  -7  -7   5   15.50    3.83
  -7  -7   4   21.58    4.08
  -7  -7   4   22.80    3.80
   7  -7  -4   17.10    3.45
   7  -7  -4   21.95    4.08
  -7  -7   3   22.10    4.70
   7  -7  -3   25.40    4.45
   7  -7  -3   23.48    3.63
   7  -7  -3   24.35    4.60
  -7  -7   3   25.40    3.68
   7  -7  -2    1.10    4.30
  -7  -7   2    1.55    2.40
   7  -7  -2    1.58    2.60
   7  -7  -2    0.38    4.05
   7  -7  -1  135.02   12.90
   7  -7  -1  144.95   13.33
  -7  -7   1  115.24   12.65
   7  -7   0   21.05    3.43
   7  -7   0   20.13    4.30
   7  -7   1    6.30    2.65
   7  -7   1    6.43    4.13
   7  -7   2   50.18    5.60
   7  -7   3    1.10    2.68
   7  -7   4   41.01    4.85
   7  -7   4   44.13    4.68
   7   7   5    4.60    1.70
   7  -7   5    5.40    2.25
   7   7   6   53.08    4.98
   7  -7   6   48.51    4.93
   7   7   6   41.93    4.73
   7   7   7    1.15    1.23
   7   7   7    1.80    1.73
   7  -7   7    2.90    2.40
   7   7   8   52.43    5.70
   7  -7   8   69.81    6.00
   7  -8 -13   -0.45    1.15
  -7   8  12    3.05    1.60
   7  -8 -12    6.10    1.65
   7  -8 -11   10.43    2.18
  -7   8  11    5.70    2.03
   7  -8 -11   10.60    2.15
   7  -8 -10   18.40    2.63
  -7   8  10   10.50    2.53
   7  -8 -10   13.78    2.73
   7  -8  -9    8.25    2.55
  -7   8   9    4.50    2.25
   7  -8  -9    9.08    2.68
   7  -8  -8    6.75    2.65
   7  -8  -8    5.33    2.25
   7  -8  -8    6.05    2.75
   7  -8  -7   29.45    4.08
   7  -8  -7   35.53    4.45
   7  -8  -7   38.11    4.38
   7  -8  -6    0.75    2.95
   7  -8  -6   -0.35    2.45
   7  -8  -6   -0.30    3.00
  -7  -8   6   -1.18    2.73
   7  -8  -5   34.31    4.20
   7  -8  -5   37.08    4.75
  -7  -8   5   24.65    4.68
   7  -8  -4    3.93    2.73
   7  -8  -4    7.28    3.60
  -7  -8   4    3.35    3.73
  -7  -8   3   31.08    5.70
   7  -8  -3   35.76    4.65
   7  -8  -3   43.13    5.58
   7  -8  -3   45.28    5.55
   7  -8  -2   10.70    4.55
  -7  -8   2    9.05    4.43
   7  -8  -2    6.40    2.95
   7  -8  -1    2.25    2.80
   7  -8   0    9.43    2.80
   7  -8   1   95.82    9.55
   7  -8   2    1.80    2.48
   7  -8   3   58.91    6.23
   7  -8   3   54.28    6.05
   7  -8   3   70.59    6.58
   7   8   4    0.85    1.68
   7  -8   4    2.05    2.08
   7  -8   4    1.78    2.65
   7   8   5   57.23    5.98
   7  -8   5   58.63    6.10
   7  -8   5   71.84    6.40
   7   8   6    3.73    1.43
   7  -8   6    2.23    1.55
   7  -8   6    6.58    2.15
   7   8   7   26.18    3.00
   7  -8   7   37.56    3.35
   7  -9 -11    4.90    1.38
   7  -9 -10   13.15    2.00
   7  -9 -10    9.35    1.88
   7  -9  -9    8.03    2.05
   7  -9  -9    6.15    1.63
   7  -9  -9    9.20    2.03
   7  -9  -8    7.70    2.18
   7  -9  -8    6.15    1.80
   7  -9  -8    4.13    2.15
   7  -9  -7   12.58    2.68
   7  -9  -7    9.85    2.23
   7  -9  -7   11.08    2.55
   7  -9  -6   46.03    5.15
   7  -9  -6   53.08    5.45
   7  -9  -5   11.15    2.58
  -7  -9   5   16.03    3.48
   7  -9  -4   74.84    7.65
  -7  -9   4   51.66    8.15
   7  -9  -3   -0.95    3.68
   7  -9  -3    0.23    2.48
  -7  -9   3    4.50    3.90
   7  -9  -2   62.14    5.95
  -7  -9   2   40.88    6.55
  -7  -9   1    0.23    3.55
   7  -9  -1    0.60    2.33
  -7  -9   0    7.03    3.60
   7  -9   0   10.08    2.48
   7  -9   0   14.73    3.30
  -7  -9  -1   10.98    3.43
   7  -9   1    7.05    2.45
   7  -9   1    9.03    2.95
   7  -9   2   28.63    3.65
   7  -9   2   27.85    3.30
   7  -9   2   35.51    3.90
   7  -9   3    1.55    1.85
   7  -9   3    3.50    2.25
   7  -9   4   20.23    2.68
   7  -9   4   23.53    2.95
   7  -9   5    1.43    1.63
   7 -10  -9    0.38    1.25
   7 -10  -7   -0.95    1.33
   7 -10  -6   18.33    2.40
   7 -10  -5    3.63    2.48
   7 -10  -5    2.88    1.70
   7 -10  -4    7.43    1.88
   7 -10  -4    4.85    2.08
  -7 -10   4    1.93    2.38
   7 -10  -3    7.03    1.83
   7 -10  -3    4.58    2.10
  -7 -10   3    4.25    2.55
   7 -10  -2   14.13    2.28
   7 -10  -2   17.98    2.68
  -7 -10   2   10.53    2.85
   7 -10  -1   10.80    2.15
   7 -10  -1   14.50    2.55
  -7 -10   1   12.50    2.95
   7 -10   0    5.70    1.80
   7 -10   0    8.35    2.20
  -7 -10   0   12.48    2.75
   7 -10   1   14.50    2.23
   7 -10   1   17.50    2.48
   7 -10   2    8.55    1.60
   7 -10   2   10.45    1.85
   7 -10   3    1.53    1.28
  -7 -10  -3    0.75    1.53
  -8   0  17   22.80   22.13
  -8   0  16   46.91   25.28
  -8   0  15  -14.28   25.05
  -8   0  15    1.98    4.38
  -8   0  14   22.48   20.23
  -8   0  14   10.30    5.03
  -8   0  13    0.15   18.35
  -8   0  13   -3.48    4.80
  -8   0  12    0.15   17.03
  -8   0  12   -9.33    4.63
  -8   0  11   -1.85   15.73
  -8   0  11   -1.65    2.73
  -8   0  11    0.05    4.50
  -8   0  10    2.38   16.68
  -8   0  10   11.85    3.40
  -8   0  10   22.33    4.78
  -8   0   9    1.90    2.90
  -8   0   9    0.10    4.03
  -8   0   8  329.53   29.28
  -8   0   8  284.85   29.38
  -8   0   7    1.05    3.20
  -8   0   7    3.40    3.63
  -8   0   6  245.97   31.58
  -8   0   6  287.57   31.33
  -8   0   5   -4.95    4.40
   8   0  -5    1.70    2.13
  -8   0   5   -3.90   11.48
  -8   0   4  165.50   20.98
   8   0  -4  225.76   20.08
  -8   0   3   -2.75    5.48
  -8   0   3    3.10    3.48
   8   0  -3    2.73    2.18
  -8   0   2   47.58    6.10
   8   0  -2   51.28    5.33
  -8   0   1   -2.65    5.90
   8   0  -1    2.85    2.25
  -8   0   0   60.61    7.35
   8   0   0   33.23    4.18
  -8   0  -1   -0.10    5.78
   8   0   1    2.43    2.50
  -8   0  -2    5.70    5.13
  -8   0  -3    0.50    3.83
   8   0   3   -0.13    1.88
  -8   0  -4   27.03    4.05
   8   0   4   20.58    3.45
   8   0   4   18.33    2.88
  -8   0  -5   -0.33    2.60
   8   0   5   -1.18    2.13
  -8   0  -6   68.24    6.88
   8   0   7    0.13    2.63
   8   0   8    4.70    2.33
   8   0   9    0.13    2.00
   8   0   9   -1.45    1.65
   8   0  10    7.68    1.55
  -8   1  17    8.23   20.35
  -8  -1  17   37.63   22.03
  -8  -1  16   -4.45   24.73
  -8   1  16   21.05   22.20
  -8   1  16    1.33    3.83
  -8   1  15   72.54   20.75
  -8   1  15   56.83    7.38
  -8  -1  14   -0.20   23.55
  -8   1  14    6.50   16.05
  -8  -1  14   11.88    4.80
  -8   1  14   24.83    5.43
  -8  -1  13   39.63   22.50
  -8  -1  13   35.51    6.03
  -8   1  13   43.46    6.48
  -8  -1  12    4.75   20.65
  -8  -1  12    2.85    3.23
  -8  -1  12    4.75    4.48
  -8   1  12    4.25    4.73
  -8  -1  11    3.38   18.08
  -8  -1  11    5.50    2.98
  -8  -1  11    6.28    4.28
  -8   1  11    5.68    4.63
  -8  -1  10   -2.73   17.30
  -8  -1  10    4.15    2.78
  -8   1  10    2.75    2.70
  -8  -1  10    2.48    4.00
  -8   1  10    2.75    4.50
  -8  -1   9    8.13   16.50
  -8   1   9    2.25   15.93
  -8  -1   9   18.53    3.65
  -8   1   9   24.33    3.78
  -8  -1   9   16.80    4.38
  -8   1   9   19.33    4.83
  -8  -1   8   11.18   14.00
  -8   1   8    6.93   15.18
  -8  -1   8    1.98    2.80
  -8   1   8    4.45    3.28
  -8  -1   8    3.63    3.98
  -8   1   8    2.45    3.95
  -8   1   7   38.46    4.93
  -8  -1   7   38.26    5.35
  -8  -1   7   29.75    4.90
  -8  -1   7   23.78   12.30
  -8  -1   6  127.75   13.15
  -8   1   6  125.07   13.00
  -8  -1   6  139.40   12.60
  -8  -1   6  107.17   16.30
  -8  -1   5  139.57   16.00
  -8   1   5  124.00   15.88
  -8  -1   5  149.15   15.38
  -8   1   5  155.50   15.40
   8   1  -5  186.13   15.03
  -8  -1   5  108.57   18.33
  -8   1   5  117.79   20.15
  -8   1   4   63.16    9.35
  -8  -1   4   70.49    7.90
  -8   1   4   67.39    8.00
   8   1  -4   83.31    7.48
  -8   1   3    4.45    6.60
  -8   1   3    8.68    3.78
   8   1  -3   10.03    2.30
  -8   1   2  157.63   18.70
  -8   1   2  200.51   17.43
   8   1  -2  189.26   17.00
  -8  -1   1   11.88    5.25
  -8   1   1   16.33    4.43
   8   1  -1   14.40    2.65
   8  -1  -1   13.85    2.78
   8   1   0  260.77   25.00
   8  -1   0  262.72   25.00
   8  -1   0  251.24   24.88
  -8  -1  -1    0.03    4.33
   8   1   1   -0.10    2.80
   8  -1   1    1.68    1.98
  -8  -1  -2  227.41   19.40
   8   1   2  203.91   19.08
   8  -1   2  188.28   18.93
  -8  -1  -3   -4.88    3.13
   8  -1   3    0.23    2.60
   8  -1   3    1.13    2.13
  -8  -1  -4   16.58    3.10
   8  -1   4   17.75    3.40
   8  -1   4   18.03    2.78
  -8  -1  -5   60.24    6.75
   8  -1   5   73.26    7.03
   8  -1   5   67.74    6.73
   8   1   6    3.08    2.65
   8  -1   6    2.80    2.25
  -8   1  -7   16.13    2.88
   8   1   7   19.83    3.28
   8  -1   7   24.90    3.40
   8   1   8   19.55    2.70
   8  -1   8   18.90    2.70
   8  -1   9    2.63    1.73
   8   1   9    4.30    2.25
   8   1   9    4.43    1.73
   8  -1   9    1.65    1.68
   8   1  10   21.35    2.68
  -8   2  16    3.28    3.63
  -8  -2  16    0.73   21.45
  -8   2  15    6.85    4.70
  -8  -2  15    4.90   21.28
  -8  -2  14   28.95   20.83
  -8   2  14   18.33   14.85
  -8   2  14   26.85    5.55
  -8  -2  13   66.74   21.05
  -8   2  13   64.39   14.68
  -8  -2  13   45.83    7.60
  -8  -2  12   -0.15   17.88
  -8   2  12   22.40   12.75
  -8  -2  12   14.53    3.75
  -8  -2  12    9.55    4.13
  -8   2  12   11.50    5.18
  -8  -2  11   53.13   18.38
  -8   2  11   62.76   15.43
  -8  -2  11   92.07   10.35
  -8   2  11   93.69   10.88
  -8  -2  11  122.62   10.43
  -8  -2  10   14.25   13.88
  -8   2  10   12.85   12.53
  -8  -2  10   11.50    3.48
  -8  -2  10   19.65    4.03
  -8   2  10    9.88    4.65
  -8  -2   9   36.31   13.45
  -8   2   9   38.73   16.28
  -8  -2   9   59.18    6.53
  -8  -2   9   57.61    6.40
  -8   2   9   53.11    6.30
  -8   2   8    5.00   16.73
  -8  -2   8    1.43    3.25
  -8   2   8    0.65    3.40
  -8  -2   8    1.78    3.35
  -8  -2   8    1.03   11.58
  -8   2   7   18.35   15.05
  -8  -2   7    3.65    3.70
  -8   2   7    3.43    3.48
  -8  -2   7    4.60   10.68
  -8  -2   7    0.18    3.63
  -8   2   7    3.53    3.93
  -8   2   6    9.48   13.85
  -8  -2   6   14.70    5.03
  -8   2   6   14.38    4.53
  -8  -2   6   16.13    3.78
  -8   2   6   15.20    4.10
  -8  -2   6    7.95   10.63
  -8   2   5  230.16   20.55
  -8  -2   5  202.28   19.63
  -8   2   5  206.56   19.75
  -8   2   4    3.13    5.95
  -8  -2   4    1.05    3.20
  -8   2   4    0.45    3.58
   8   2  -4    1.48    2.25
  -8  -2   3  146.15   23.15
  -8   2   3  195.13   24.33
  -8  -2   3  225.51   22.90
   8   2  -3  297.97   22.75
  -8   2   3  236.69   22.95
   8  -2  -3  249.29   22.60
  -8  -2   2   -3.05    4.65
  -8   2   2   -0.60    4.10
   8   2  -2    0.10    2.35
   8  -2  -2    1.93    2.10
  -8  -2   1  649.16   51.41
   8   2  -1  503.78   50.93
  -8   2   1  549.79   51.23
   8  -2  -1  550.07   50.91
  -8  -2   0   34.93    5.35
   8   2   0   26.80    3.68
   8  -2   0   24.63    3.55
  -8  -2  -1  627.86   49.21
   8   2   1  492.96   48.91
   8  -2   1  505.18   48.88
  -8  -2  -2   35.48    4.78
   8  -2   2   33.41    4.33
   8  -2   2   34.41    4.08
  -8  -2  -3  257.59   24.95
   8  -2   3  263.94   24.95
   8  -2   3  270.45   24.85
  -8  -2  -4    3.58    2.23
   8  -2   4    1.65    2.50
   8  -2   4    2.83    2.48
   8  -2   5   62.11    6.73
   8  -2   5   63.16    6.53
   8   2   6    9.68    2.80
   8  -2   6   12.33    2.63
   8   2   7   68.21    6.88
   8  -2   7   66.06    6.88
   8   2   8   -0.03    1.88
  -8   2  -8   -0.10    1.78
   8  -2   8    1.78    2.10
   8   2   9   63.26    6.83
   8   2   9   74.99    6.95
   8   2  10    2.70    1.63
  -8   3  17   -0.08    9.48
  -8   3  16   13.68   15.00
  -8   3  16    2.63    3.28
  -8   3  15   -2.93   14.75
  -8   3  15    3.28    4.13
  -8   3  14    9.48   13.85
  -8   3  14   10.48    4.75
  -8  -3  14   -3.35   16.08
  -8   3  13   11.80   12.53
  -8   3  13    6.18    4.70
  -8  -3  13   11.00   15.18
  -8   3  12   84.61   16.73
  -8  -3  12   68.19   17.05
  -8   3  12  112.84   11.23
  -8   3  11    9.43   13.10
  -8  -3  11    7.55    3.48
  -8  -3  11    7.13    3.25
  -8  -3  11    6.70   12.15
  -8   3  10   69.69   19.03
  -8  -3  10  115.27   11.55
  -8  -3  10  130.15   11.83
  -8  -3  10   62.14   15.78
  -8   3   9   -0.65   14.20
  -8  -3   9   -0.05    3.20
  -8  -3   9   -1.08    3.05
  -8   3   9   -1.80    4.20
  -8  -3   9   -2.10   10.23
  -8   3   8  135.05   14.83
  -8  -3   8  163.93   14.70
  -8   3   8  157.80   14.95
   8  -3  -8  160.05   14.38
  -8  -3   8  102.17   17.58
  -8  -3   8  141.50   15.03
  -8   3   7   27.48   16.35
  -8   3   7   52.31    5.58
  -8  -3   7   22.05    5.43
  -8  -3   7   31.61    4.65
  -8   3   7   30.73    5.33
   8  -3  -7   34.63    3.95
  -8  -3   6  139.42   14.40
  -8   3   6  142.65   14.75
   8  -3  -6  144.00   14.18
  -8   3   6  103.74   20.75
  -8   3   5  351.38   27.65
  -8  -3   5  267.37   26.68
  -8   3   5  273.97   26.85
   8  -3  -5  288.92   26.55
  -8  -3   4   68.61   10.50
  -8   3   4  101.82   11.85
  -8   3   4  103.24   10.28
   8  -3  -4  105.62    9.65
  -8  -3   3    6.88    4.68
  -8   3   3    5.23    4.13
   8  -3  -3    7.83    2.58
  -8  -3   2  227.36   18.43
  -8   3   2  170.30   18.15
   8  -3  -2  181.58   17.73
  -8  -3   1  204.28   17.58
  -8   3   1  175.58   17.58
   8  -3  -1  169.83   17.08
  -8  -3   0  138.77   12.60
   8  -3   0  118.14   12.23
  -8  -3  -1  140.42   13.65
   8   3   1  138.77   13.48
   8  -3   1  139.55   13.45
  -8  -3  -2  231.21   22.90
   8   3   2  253.59   22.93
   8  -3   2  233.94   22.95
   8  -3   2  251.44   22.90
  -8  -3  -3    6.25    2.30
   8   3   3    4.48    2.40
   8  -3   3    6.65    2.48
   8  -3   3    2.45    2.50
   8   3   4   17.55    3.20
   8  -3   4   18.50    3.25
   8  -3   4   18.03    3.20
   8  -3   5    1.35    2.65
   8  -3   5   -0.98    2.73
   8   3   6  141.62   14.55
   8  -3   6  161.53   14.63
   8  -3   6  154.73   14.63
   8   3   7    4.50    2.00
   8  -3   7    3.53    2.48
   8   3   8  140.10   14.28
   8  -3   8  151.80   14.30
   8  -3   8  166.48   14.43
   8   3   9    0.33    2.00
   8   3   9   -0.88    1.88
   8   3  10   58.56    5.73
  -8   4  16   10.65    9.08
  -8   4  16    4.23    2.78
  -8   4  15    6.33   12.03
  -8   4  15    7.53    3.65
  -8   4  14   10.30   13.73
  -8   4  14   22.15    4.58
  -8   4  13   15.20   13.38
  -8   4  12   17.18   14.10
  -8   4  11   39.56   15.25
  -8   4  11   33.41    5.70
   8  -4 -11   34.13    4.25
  -8  -4  11   43.28    5.40
  -8   4  10   17.05   16.03
  -8  -4  10   15.63    4.15
  -8   4  10   11.00    4.43
   8  -4 -10   13.68    2.80
  -8   4   9   66.76    8.98
   8  -4  -9   81.31    8.23
  -8  -4   9   62.16    8.90
  -8   4   8    1.23   14.75
   8  -4  -8    3.35    3.80
  -8  -4   8    1.55    3.90
  -8   4   8    0.03    3.78
   8  -4  -8    0.48    2.40
  -8   4   7  163.08   17.28
   8  -4  -7  159.28   16.80
   8  -4  -6   24.53    4.45
  -8  -4   6    5.98    4.00
  -8   4   6   14.48    4.40
  -8   4   6   13.10    4.28
   8  -4  -6   14.48    2.78
  -8   4   6    4.23   13.55
  -8  -4   5   33.63    7.40
  -8   4   5   47.73    8.03
  -8   4   5   59.99    7.40
   8  -4  -5   63.49    6.70
   8  -4  -5   97.27    7.73
  -8  -4   5   83.69    7.25
  -8   4   4  121.90   16.28
  -8   4   4  172.18   15.03
   8  -4  -4  177.48   14.68
  -8  -4   4  107.59   14.93
  -8  -4   3   -0.05    3.68
   8   4  -3    2.40    2.48
  -8   4   3    1.30    3.95
   8  -4  -3    0.75    2.85
   8   4  -2   24.40    3.40
  -8  -4   2   25.55    4.38
  -8   4   2   20.83    4.80
   8  -4  -2   20.40    3.55
   8   4  -1   79.94    7.88
  -8   4   1   77.64    8.55
   8  -4  -1   72.86    7.98
  -8  -4   1   81.66    8.28
  -8  -4   0    9.10    3.13
   8   4   0    7.18    2.63
   8  -4   0   10.33    3.03
   8   4   1  329.91   30.91
   8  -4   1  347.11   31.01
  -8  -4  -1  314.80   30.93
  -8  -4  -2   -1.38    2.08
   8   4   2   -0.03    2.38
   8  -4   2    0.63    2.48
   8  -4   2   -0.25    2.58
   8   4   3  143.17   14.30
   8  -4   3  147.30   14.38
   8  -4   3  160.08   14.45
   8   4   4    0.98    2.33
   8  -4   4    1.03    2.43
   8  -4   4    1.30    2.73
   8   4   5  113.14   12.20
   8  -4   5  138.47   12.38
   8  -4   5  134.22   12.40
   8  -4   6    0.43    2.15
   8  -4   6   -0.65    2.63
   8   4   7   75.71    8.08
   8  -4   7   95.99    8.35
   8   4   8    8.90    2.28
   8  -4   8    8.05    2.38
   8   4   9   59.76    5.93
   8   4   9   59.76    5.98
  -8   5  15   11.40    6.25
  -8   5  14    2.38    8.33
  -8   5  14    3.30    3.33
  -8   5  13    7.03   11.35
  -8   5  13   37.18    5.03
  -8   5  12   -4.90   12.10
  -8   5  12    3.23    3.88
   8  -5 -12    5.50    2.30
  -8   5  11  200.13   19.25
   8  -5 -11  208.88   18.88
  -8   5  10   15.80   12.65
   8  -5 -10   13.05    3.80
  -8  -5  10    0.78    4.13
  -8   5  10    7.48    4.18
   8  -5 -10    3.93    2.70
  -8   5   9   66.81   18.25
  -8   5   9  145.67   14.45
   8  -5  -9  145.80   14.05
  -8  -5   9   84.34   14.48
   8  -5  -8    3.60    3.28
  -8   5   8    2.78    3.85
   8  -5  -8    3.50    2.60
  -8   5   8    0.73   11.43
  -8  -5   7   16.38    4.95
  -8   5   7   36.26    5.08
   8  -5  -7   32.18    4.15
  -8  -5   7   34.86    4.38
   8  -5  -7   48.76    4.90
  -8   5   7   17.15   11.23
  -8   5   6   38.96    5.70
   8  -5  -6   45.46    5.15
   8  -5  -6   60.26    5.98
  -8  -5   6   61.24    5.65
  -8   5   5   10.25    5.03
  -8   5   5   30.88    4.78
   8  -5  -5   30.93    4.20
   8  -5  -5   55.96    5.80
  -8  -5   5   43.53    4.90
  -8  -5   5   23.63    4.68
  -8   5   4  305.00   31.13
   8  -5  -4  341.46   31.03
  -8  -5   4  374.71   31.36
  -8  -5   4  347.38   31.18
  -8  -5   3   15.65    3.58
  -8   5   3   12.80    3.85
   8  -5  -3   18.58    3.50
   8   5  -2   32.66    3.65
  -8   5   2   29.25    4.68
   8  -5  -2   24.18    4.18
  -8  -5   2   29.05    4.28
  -8  -5   1    7.83    2.75
   8   5  -1    5.83    2.30
   8  -5  -1    7.28    3.08
  -8  -5   0   12.33    2.70
   8   5   0   13.78    2.65
   8  -5   0   16.75    3.43
   8   5   1  122.25   11.88
  -8  -5  -1  109.84   11.75
   8   5   2    2.33    2.15
   8  -5   2    1.70    2.45
   8  -5   2    0.50    2.85
   8   5   3   -0.38    2.03
   8  -5   3   -0.28    2.43
   8  -5   3    1.45    2.98
   8   5   4   85.69    9.23
   8  -5   4   97.89    9.38
   8  -5   4  107.34    9.50
   8   5   5    1.38    1.83
   8  -5   5    1.93    2.25
   8  -5   5    0.43    2.63
   8  -5   6   28.80    3.58
   8  -5   6   35.38    4.05
   8   5   7    5.38    1.98
   8  -5   7    4.83    2.28
   8   5   8   15.65    2.28
   8   5   8   12.73    2.38
   8  -5   8   18.78    2.65
   8   5   9    8.38    1.35
   8   5   9    9.05    1.48
  -8   6  14   17.35    3.03
  -8   6  13   -0.60    2.75
   8  -6 -13    1.03    1.55
  -8   6  12   62.11    7.20
   8  -6 -12   69.99    6.75
  -8   6  11    2.28    3.33
   8  -6 -11   -0.30    2.23
  -8   6  10  103.37   12.65
   8  -6 -10  114.87   12.43
  -8   6   9   21.00    4.33
   8  -6  -9   27.05    3.70
   8  -6  -9   31.96    4.15
  -8   6   8   36.81    5.25
   8  -6  -8   42.23    4.73
   8  -6  -8   54.26    5.23
   8  -6  -7   15.55    3.55
  -8  -6   7    6.05    4.05
  -8   6   7   12.20    3.58
   8  -6  -7   10.85    2.85
  -8  -6   7   13.00    2.93
  -8   6   6   79.16    9.83
   8  -6  -6   95.17    9.68
   8  -6  -6  122.32   10.10
  -8  -6   6  107.09    9.95
  -8  -6   6   87.31   10.03
  -8   6   5   49.38    6.75
   8  -6  -5   60.94    6.68
   8  -6  -5   73.26    7.35
  -8  -6   5   67.59    7.08
  -8  -6   5   63.14    7.00
   8  -6  -4   97.27    9.53
  -8  -6   4   91.24    9.78
  -8  -6   4  101.89    9.60
  -8  -6   3    9.55    2.93
   8  -6  -3   10.23    3.50
  -8  -6   2   20.33    3.38
   8  -6  -2   25.30    3.93
   8  -6  -1  173.70   14.98
  -8  -6   1  143.15   14.65
  -8  -6   0   10.30    2.23
   8  -6   0   20.65    3.63
   8  -6   1   32.46    4.73
   8  -6   2    5.70    2.60
   8  -6   2    6.00    3.10
   8  -6   3    6.58    2.48
   8  -6   3    4.35    2.98
   8  -6   4   -2.18    2.00
   8  -6   4    1.73    2.63
   8  -6   5    0.90    1.85
   8  -6   5    0.40    2.45
   8  -6   6   34.46    3.70
   8   6   6   26.18    3.20
   8   6   7    1.55    1.40
   8   6   7    0.58    1.63
   8  -6   7    2.75    1.95
   8  -6   8   39.96    4.20
  -8   7  13    3.30    1.73
  -8   7  12    5.35    2.18
   8  -7 -12    5.78    1.68
  -8   7  11   32.76    4.28
   8  -7 -11   40.23    4.08
  -8   7  10   12.40    3.03
   8  -7 -10   14.80    2.70
  -8   7   9   22.73    4.10
   8  -7  -9   33.11    4.00
   8  -7  -8   27.58    3.65
   8  -7  -8   36.48    4.13
   8  -7  -7   13.38    3.50
  -8   7   7    7.10    2.80
   8  -7  -7    9.23    2.93
   8  -7  -6   90.12    8.68
   8  -7  -6  108.17    9.13
  -8  -7   6   88.76    9.03
   8  -7  -5    5.68    4.53
  -8  -7   5    5.80    3.25
   8  -7  -5    3.70    3.13
  -8  -7   5    6.15    3.15
   8  -7  -4  153.68   12.93
  -8  -7   4  138.07   12.80
  -8  -7   3    8.08    3.75
  -8  -7   3   10.45    2.83
  -8   7   3    8.75    3.75
   8  -7  -3   10.95    3.45
  -8  -7   2   81.16   10.63
  -8  -7   2   99.39    9.98
   8  -7  -1   14.10    3.63
   8  -7   0   73.44    7.90
   8  -7   1   11.20    3.40
   8  -7   2   49.96    5.55
   8  -7   2   56.66    5.85
   8  -7   3    1.45    1.93
   8  -7   3    3.13    2.68
   8  -7   4   36.86    3.75
   8  -7   4   44.23    4.20
   8   7   5    0.85    1.18
   8  -7   5    0.15    2.15
   8   7   6   19.25    2.35
   8   7   7    5.18    1.13
   8  -8 -11    7.33    1.63
   8  -8 -10   11.30    2.03
   8  -8  -9   21.40    3.18
   8  -8  -9   13.40    2.53
   8  -8  -8    5.83    3.15
   8  -8  -8    2.03    2.18
   8  -8  -7   88.76    9.98
   8  -8  -7  126.12   10.40
   8  -8  -6    6.45    3.73
   8  -8  -6    5.88    2.80
  -8  -8   6    1.78    2.50
   8  -8  -5  171.28   13.70
  -8  -8   5  109.84   13.68
   8  -8  -4    0.03    1.90
   8  -8  -4    2.10    2.93
  -8  -8   4    1.83    3.33
   8  -8  -3  115.27   11.58
  -8  -8   3   94.54   12.13
  -8  -8   2    5.65    3.60
   8  -8  -2    6.25    1.93
   8  -8  -2    9.25    3.08
  -8  -8   1   16.90    4.30
   8  -8  -1   35.18    4.05
  -8  -8   0    3.03    3.40
   8  -8   0    1.90    2.78
   8  -8   1   87.14    8.73
   8  -8   2    0.85    1.65
   8   8   3   44.28    4.35
   8  -8   3   42.78    4.40
   8   8   4    0.33    1.13
   8  -9  -9    6.75    1.68
   8  -9  -8   36.76    3.98
   8  -9  -7    3.93    1.95
   8  -9  -6   44.18    4.75
   8  -9  -5    2.88    2.13
  -8  -9   5    6.65    2.38
   8  -9  -4   69.54    5.65
  -8  -9   4   36.08    5.73
   8  -9  -3    5.53    2.33
  -8  -9   3    4.68    2.58
   8  -9  -2   19.83    2.85
  -8  -9   2   10.15    3.18
  -8  -9   1    0.40    2.58
  -8  -9   0   75.04    7.68
  -8  -9  -1    3.38    2.23
   8  -9   1    1.08    1.30
  -8  -9  -2   43.11    4.60
  -8  -9  -3    1.70    1.50
   8  -9   3    1.23    1.45
   8 -10  -6   -1.00    1.25
   8 -10  -5    8.58    1.63
  -8 -10   2    4.73    1.60
  -8 -10   1   18.55    2.40
   8 -10   0    3.00    1.18
  -8 -10   0    2.30    1.30
  -9   0  16   10.45   15.15
  -9   0  15    1.50    3.48
  -9   0  15   -5.05   15.55
  -9   0  14   40.61   16.23
  -9   0  14   33.81    5.38
  -9   0  13   11.63   14.43
  -9   0  13    0.18    4.15
  -9   0  12   15.50   15.58
  -9   0  12   21.68    4.75
  -9   0  11    0.13   13.13
  -9   0  11   -0.63    2.55
  -9   0  11   -2.20    3.90
  -9   0  10    5.13    2.93
  -9   0  10   18.50    4.23
  -9   0   9   -0.10    2.75
  -9   0   9    2.25    3.53
  -9   0   8   74.19    7.33
  -9   0   8   57.38    7.23
  -9   0   7   -1.00    3.63
  -9   0   7    0.63    3.08
  -9   0   6   32.51    6.23
  -9   0   6   36.08    5.68
  -9   0   5    2.25    4.83
   9   0  -5   -0.40    2.18
  -9   0   4    0.13    5.30
   9   0  -4    4.28    2.28
  -9   0   3    1.78    3.28
   9   0  -3    0.55    2.20
   9   0  -2   16.40    2.80
  -9   0   1   -1.13    5.08
   9   0  -1   -1.03    2.35
  -9   0   0  206.38   16.85
   9   0   0  155.10   16.05
  -9   0  -1    0.15    4.08
   9   0   1   -0.33    2.40
  -9   0  -2   39.41    5.38
  -9   0  -3   -0.80    2.80
  -9   0  -4   75.16    7.63
  -9   0  -5   -0.63    1.98
   9   0   5    0.60    2.53
  -9   0  -6   67.91    7.50
   9   0   6   98.87    7.83
   9   0   7    2.13    1.88
   9   0   8    6.68    1.80
   9   0   8    8.48    1.63
  -9   1  16    3.13   13.60
  -9   1  15   24.00   14.43
  -9   1  15   13.20    3.85
  -9  -1  15   25.58   15.30
  -9  -1  14   16.50    4.28
  -9   1  14   29.03    4.75
  -9  -1  14   23.03   15.03
  -9  -1  13   10.58    4.15
  -9   1  13    8.90    4.25
  -9  -1  13   12.58   15.03
  -9  -1  12   76.11    8.65
  -9   1  12   72.01    8.70
  -9  -1  12   87.21    8.38
  -9  -1  11    0.18    2.48
  -9  -1  11   -1.40    3.80
  -9   1  11   -0.48    4.10
  -9  -1  11   -0.83   11.75
  -9   1  10   66.21   20.35
  -9  -1  10  183.06   16.28
  -9   1  10  186.06   16.35
  -9  -1  10  114.67   19.55
  -9  -1  10  125.35   16.03
  -9   1  10  211.44   16.25
  -9   1   9    1.35   12.43
  -9  -1   9    1.75    2.43
  -9   1   9    2.15    2.80
  -9  -1   9    1.75    3.40
  -9   1   9    2.10    3.58
  -9  -1   9    3.88   10.28
  -9  -1   8    1.50    2.83
  -9   1   8    4.58    3.23
  -9  -1   8    1.38    3.25
  -9  -1   8    7.13    9.83
  -9   1   8    1.60   11.63
  -9  -1   7   19.45    4.75
  -9   1   7   27.48    4.68
  -9  -1   7   26.60    4.40
   9  -1  -7   34.83    3.65
  -9   1   7   18.78   10.75
  -9  -1   6   21.78    5.35
  -9   1   6   22.75    5.25
  -9  -1   6   24.78    4.20
   9  -1  -6   27.03    3.43
  -9  -1   5    0.38    5.15
  -9   1   5    4.68    5.33
  -9  -1   5    2.08    3.23
  -9   1   5    4.05    3.48
   9   1  -5    4.33    2.33
   9  -1  -5    6.08    2.28
  -9   1   4   52.11    9.48
  -9  -1   4   63.99    8.15
  -9   1   4   65.16    8.25
   9  -1  -4   78.56    7.65
   9   1  -3   27.53    3.45
  -9   1   3   21.65    4.53
   9  -1  -3   24.43    3.48
  -9   1   2  113.57   11.55
   9   1  -2  133.65   11.10
   9  -1  -2  111.89   11.03
   9   1  -1   41.28    4.85
   9  -1  -1   39.91    4.78
  -9  -1   0  157.50   13.50
   9   1   0  121.17   12.85
   9  -1   0  121.77   12.80
  -9  -1  -1   60.59    6.25
  -9   1  -1   69.74    7.00
   9   1   1   44.83    5.35
   9  -1   1   42.73    5.33
  -9  -1  -2   11.25    3.20
  -9   1  -2    0.05    4.43
  -9  -1  -3   66.71    7.05
  -9   1  -3   73.31    7.53
   9  -1   3   74.14    7.00
   9  -1   3   62.99    6.68
  -9  -1  -4    2.50    2.13
  -9   1  -4    3.48    2.68
   9  -1   4    3.08    2.40
   9  -1   4    2.78    1.80
  -9  -1  -5   38.43    4.50
  -9   1  -5   40.78    4.80
   9   1   5   53.71    4.90
  -9   1  -6    1.65    1.78
   9   1   6    2.98    2.23
   9  -1   6    4.73    2.33
   9   1   7   27.80    3.25
   9  -1   7   30.43    3.38
   9  -1   7   23.90    3.30
   9   1   8    2.38    1.68
   9   1   8    3.98    1.38
   9  -1   8    4.48    1.45
  -9   2  16    2.43    2.65
  -9   2  15   27.00   12.88
  -9   2  15   17.00    3.95
  -9   2  14    1.75   13.70
  -9   2  14    5.08    3.90
  -9  -2  14    6.85   14.00
  -9   2  13   61.76   16.90
  -9  -2  13   39.51    6.98
  -9  -2  13   76.66   15.13
  -9   2  12   -3.03   15.05
  -9  -2  12    1.45    2.78
  -9  -2  12   -0.03    3.55
  -9   2  12   -1.88    4.30
  -9  -2  12   11.00   12.48
  -9   2  11   72.39   20.10
  -9  -2  11  172.13   13.83
  -9   2  11  159.90   14.00
  -9  -2  11  113.37   13.55
  -9  -2  11   87.66   17.28
  -9   2  10   -0.10   12.68
  -9  -2  10   10.65    2.95
  -9  -2  10   16.85    3.90
  -9  -2  10    2.75    9.78
  -9   2   9   35.13   15.35
  -9  -2   9  108.07    9.38
  -9  -2   9   67.44    9.18
  -9  -2   9   64.99   13.20
  -9   2   9  109.07    9.38
  -9  -2   8    7.05    3.53
  -9   2   8   17.33    3.83
  -9  -2   8    6.93    3.15
  -9   2   8   12.83   12.20
  -9  -2   7  227.06   21.15
  -9   2   7  213.36   21.30
  -9  -2   7  182.56   21.53
  -9  -2   6  112.49   11.43
  -9   2   6  108.82   11.53
  -9  -2   6  101.12   12.25
  -9   2   5   30.61    6.08
  -9  -2   5   30.21    4.35
  -9   2   5   32.93    4.78
  -9   2   4   31.53    7.50
   9   2  -4   55.98    5.38
  -9   2   4   43.58    6.13
  -9  -2   3   98.79   16.88
  -9   2   3  115.92   17.50
   9   2  -3  217.56   16.35
  -9   2   3  175.80   16.60
  -9  -2   2    3.55    4.33
  -9   2   2    4.28    6.25
  -9   2   2    2.93    3.70
   9   2  -2    4.43    2.33
   9  -2  -2    1.43    2.23
  -9   2   1  324.53   31.81
   9  -2  -1  294.82   30.71
   9  -2   0   31.56    4.05
   9  -2   0   31.88    3.73
  -9  -2  -1  508.89   41.41
   9  -2   1  412.49   41.11
  -9  -2  -2   -0.08    2.63
   9  -2   2    1.95    2.28
   9  -2   2   -0.13    1.88
  -9  -2  -3   27.78    3.68
   9   2   3   29.75    3.75
   9  -2   3   28.75    3.85
   9  -2   3   29.35    3.48
  -9  -2  -4   19.93    2.90
   9  -2   4   26.25    3.35
   9  -2   4   24.25    3.00
  -9   2  -5    0.68    2.70
   9  -2   5    3.03    1.90
  -9   2  -6   -0.65    1.88
   9   2   6    1.68    2.00
   9   2   7    9.28    1.83
  -9   2  -7    6.93    1.65
   9  -2   7   10.48    2.08
   9   2   8    9.23    1.93
   9   2   8    8.30    1.68
  -9   3  16    8.28    2.38
  -9   3  16   10.93    7.58
  -9   3  15    0.78    3.05
  -9   3  15   -5.08   10.03
  -9   3  14   30.51   14.00
  -9   3  14   85.79    8.55
  -9   3  13   13.05   12.70
  -9   3  13    6.33    3.90
  -9   3  12   50.23   14.20
  -9   3  11  -11.68   13.05
  -9  -3  11    5.38    2.75
  -9   3  10   52.91   14.63
  -9  -3  10   84.26    7.93
  -9   3  10   83.81    8.30
  -9  -3  10   59.03    7.83
  -9  -3   9    0.48    3.03
  -9  -3   9    1.78    2.90
  -9   3   9    0.73    3.73
  -9   3   9    2.60   11.83
  -9   3   8   97.44   11.13
  -9  -3   8  125.00   10.90
  -9   3   8  120.75   11.20
  -9  -3   8   92.69   11.25
  -9   3   8   68.71   15.88
  -9  -3   7    9.45    4.33
  -9   3   7   10.38    3.83
  -9   3   7    8.28    3.65
  -9   3   7    1.38   12.00
  -9   3   6  226.59   21.83
  -9   3   6  221.26   21.33
  -9  -3   5    5.30    4.05
  -9   3   5    9.48    4.85
  -9   3   5   11.65    3.75
  -9  -3   4    5.68    4.43
  -9   3   4    2.75    5.33
  -9   3   4   10.45    3.40
   9  -3  -4   12.00    2.20
  -9  -3   3    1.68    4.13
  -9   3   3   -0.70    5.50
   9   3  -3    0.83    2.28
  -9   3   3    1.53    3.58
   9  -3  -3    0.03    1.98
  -9  -3   2   72.84    7.08
   9   3  -2   56.46    5.75
  -9   3   2   28.73    8.70
  -9   3   2   42.73    6.40
   9  -3  -2   54.03    5.58
  -9  -3   1    4.53    3.50
   9   3  -1    0.15    2.35
   9  -3  -1    1.70    2.00
  -9  -3   0  208.08   18.08
   9   3   0  191.76   17.80
   9  -3   0  174.40   17.70
  -9  -3  -1   -0.90    2.70
   9   3   1    0.05    2.30
   9  -3   1    0.05    2.28
   9  -3   1    0.18    2.00
  -9  -3  -2  227.31   20.88
   9   3   2  238.89   20.90
   9  -3   2  215.29   20.85
   9  -3   2  207.26   20.78
  -9  -3  -3    0.28    1.88
   9   3   3    0.68    2.33
   9  -3   3   -0.63    2.50
   9  -3   3    0.18    2.13
   9   3   4   76.04    7.65
   9  -3   4   83.49    7.78
   9  -3   4   72.46    7.60
   9  -3   5   22.73    3.03
   9  -3   5   19.03    2.80
  -9   3  -6   46.13    5.20
   9  -3   6   50.78    5.05
   9   3   7   20.65    2.45
  -9   3  -7   16.73    2.50
   9  -3   7   24.45    2.63
   9   3   8   33.86    3.95
   9   3   8   45.93    4.10
  -9   4  15   12.25    2.95
  -9   4  15    7.25    6.38
  -9   4  14   -0.43    7.95
  -9   4  13   38.38   10.10
  -9   4  12    4.65    3.85
  -9   4  12   -1.38   10.00
  -9   4  11   41.58    5.48
  -9  -4  11   37.83    5.05
  -9  -4  10    9.83    3.65
  -9   4  10   17.05    4.10
  -9   4  10    4.25   11.13
  -9   4   9   48.76    5.78
  -9  -4   9   38.41    5.83
  -9  -4   8    2.40    3.88
  -9   4   8    0.65    3.60
  -9   4   8    4.33   10.98
  -9   4   7   71.81    7.18
   9  -4  -7   82.11    6.48
  -9   4   6   46.23    8.28
  -9   4   6   88.91    8.28
   9  -4  -6  107.37    7.80
  -9  -4   6   42.88    8.20
  -9   4   5  126.20   21.45
  -9   4   5  255.22   21.33
   9  -4  -5  313.58   21.10
  -9  -4   5  131.02   21.35
  -9   4   4   65.26    7.20
   9  -4  -4   72.64    6.65
  -9  -4   4   66.04    7.68
   9   4  -3  118.47    9.83
  -9   4   3   87.44   10.18
   9  -4  -3   99.59    9.78
  -9  -4   3  116.34   10.50
  -9  -4   2   15.05    3.63
   9   4  -2   18.78    2.88
   9  -4  -2   14.53    2.83
   9   4  -1   88.19    8.43
   9  -4  -1   78.04    8.38
  -9  -4   1   88.46    8.68
   9   4   0   25.60    3.55
   9  -4   0   28.75    3.58
  -9  -4   0   26.63    3.68
   9   4   1   61.81    5.95
   9  -4   1   56.63    6.08
   9  -4   1   60.14    5.95
  -9  -4  -1   49.98    5.88
  -9  -4  -2    0.75    1.75
   9   4   2   -0.18    2.15
   9  -4   2   -0.95    2.18
   9  -4   2   -0.08    2.13
   9   4   3   32.16    4.00
   9  -4   3   39.81    4.18
   9  -4   3   35.41    4.13
   9   4   4   68.51    7.45
   9  -4   4   86.26    7.70
   9  -4   4   78.99    7.60
   9   4   5   24.28    3.18
   9  -4   5   33.01    3.43
   9  -4   5   29.28    3.43
   9  -4   6   64.01    6.38
  -9   4  -7   17.10    2.35
   9   4   7   19.33    2.40
   9   4   8   21.05    2.35
  -9   5  14    0.68    2.35
  -9   5  13   18.83    3.30
  -9   5  13    8.93    6.05
  -9   5  12   10.15    3.20
  -9   5  12    9.50    6.75
  -9   5  11    8.85    3.20
  -9   5  11    0.93    7.65
  -9  -5  10   12.68    4.10
  -9   5  10   14.25    3.50
  -9   5  10    8.93    8.20
  -9   5   9    3.63    3.15
   9  -5  -9    0.70    2.08
  -9   5   8  107.47   12.35
   9  -5  -8  135.85   12.08
  -9  -5   7    1.98    3.35
  -9   5   7    1.95    3.20
   9  -5  -7    2.40    2.25
  -9   5   6   93.19    9.15
   9  -5  -6  120.72    8.93
  -9  -5   5    1.48    3.25
  -9   5   5    1.05    3.58
  -9   5   5   -0.30    3.08
   9  -5  -5    5.73    2.45
  -9   5   4   64.09    6.73
   9  -5  -4   73.69    6.33
  -9  -5   4   78.29    6.85
  -9   5   3   57.71    8.00
  -9   5   3   61.74    6.83
   9  -5  -3   74.66    6.58
  -9  -5   3   78.79    6.90
  -9  -5   2   12.25    3.00
   9   5  -2   10.20    2.23
   9  -5  -2   13.88    2.80
   9   5  -1   65.09    6.55
   9  -5  -1   74.56    6.85
  -9  -5   1   58.18    6.70
  -9  -5   0    0.53    1.90
   9   5   0    1.00    1.85
   9  -5   0    4.38    2.43
   9   5   1    8.13    1.98
   9  -5   1    6.48    2.45
   9  -5   1    7.70    2.50
   9   5   2   10.60    2.23
   9  -5   2   13.23    2.50
   9  -5   2   15.20    2.60
   9   5   3   14.35    2.38
   9  -5   3   21.30    2.75
   9  -5   3   16.38    2.83
   9  -5   4    1.20    1.95
   9  -5   4    2.55    2.13
   9  -5   5   80.11    7.58
   9  -5   5   75.46    7.65
   9   5   6    2.95    1.53
   9  -5   6    5.83    1.65
  -9   5  -7   45.63    4.40
   9   5   7   36.38    4.38
   9   5   7   50.73    4.38
  -9   6  13    1.43    1.88
  -9   6  12   23.68    3.23
  -9   6  11    3.68    2.48
  -9   6  10   32.66    4.43
   9  -6 -10   37.18    4.00
  -9   6   9    9.43    3.03
   9  -6  -9   16.20    2.58
  -9  -6   8    4.83    3.78
  -9   6   8    2.33    2.80
   9  -6  -8    4.75    2.23
  -9   6   7   25.53    3.88
   9  -6  -7   36.73    3.70
  -9  -6   6    2.58    3.35
  -9   6   6   -0.25    2.68
   9  -6  -6    1.35    2.53
  -9  -6   5    7.78    3.08
  -9   6   5    5.83    2.68
   9  -6  -5    4.93    2.50
  -9  -6   5    5.83    2.75
  -9  -6   4   -2.48    2.88
  -9   6   4    0.13    3.05
   9  -6  -4   -1.13    2.28
  -9  -6   4    1.08    3.08
  -9  -6   3    2.38    3.10
  -9  -6   3    5.25    2.55
  -9   6   3    7.30    3.70
   9  -6  -3    5.33    2.63
  -9   6   2   42.88    5.80
   9  -6  -2   42.43    4.40
  -9  -6   2   36.13    4.15
  -9  -6   1    0.53    1.83
   9  -6  -1   -0.05    2.48
   9  -6   0   78.19    7.90
   9  -6   1   65.86    6.88
   9  -6   1   70.71    6.98
   9  -6   2   76.89    7.60
   9  -6   2   76.71    7.65
   9  -6   3    4.15    1.83
   9  -6   3    2.68    2.08
   9  -6   4   40.83    4.35
   9  -6   4   42.71    4.50
   9   6   5    0.38    1.18
   9  -6   5   -0.48    1.65
  -9   6  -6   46.13    4.63
   9   6   6   35.98    4.43
  -9   7  11    5.85    1.55
  -9   7  10   11.63    2.45
   9  -7 -10   25.98    2.55
  -9   7   9    0.73    1.73
   9  -7  -9   -0.40    1.88
   9  -7  -8   47.43    5.05
   9  -7  -7   -0.38    2.13
  -9  -7   5    1.30    2.78
   9  -7  -5    0.38    2.23
  -9  -7   5    0.20    2.35
   9  -7  -4   65.31    6.05
  -9  -7   4   66.96    6.18
  -9  -7   3    3.25    2.20
  -9   7   3    0.48    2.18
   9  -7  -3    2.30    2.55
  -9  -7   3    1.60    2.83
  -9  -7   2   26.90    4.75
  -9   7   2   41.46    4.68
  -9  -7   2   35.23    4.13
  -9   7   1   52.81    5.63
   9  -7  -1   62.64    5.43
   9  -7   0   87.81    8.90
   9  -7   0   95.97    9.00
   9  -7   1    2.23    1.80
   9  -7   1    2.83    2.08
   9  -7   2    6.65    1.68
   9  -7   2    6.85    2.00
   9  -7   3   -0.15    1.40
   9  -7   3    1.03    1.73
   9   7   4    5.18    1.30
   9  -7   4    7.23    1.70
  -9   7  -5    1.70    1.35
   9  -7   5    0.63    1.15
   9  -8  -9   22.95    2.60
   9  -8  -8   -0.08    1.48
   9  -8  -7   36.78    3.95
   9  -8  -6    3.23    1.85
   9  -8  -5   97.47    9.45
   9  -8  -4   17.50    2.48
  -9  -8   4    5.30    2.28
   9  -8  -3  106.42    8.15
  -9  -8   3   58.73    8.13
   9  -8  -2    4.65    2.08
  -9  -8   2   -0.05    2.40
   9  -8  -1   69.81    6.43
  -9  -8   1   56.38    6.58
  -9  -8   0    3.98    2.15
  -9   8   0    0.93    1.50
   9  -8   0    2.33    1.53
   9  -8   0    0.55    1.80
  -9   8  -1   12.53    2.23
   9  -8   1   15.93    2.08
   9  -8   1   16.00    2.28
  -9  -8  -2   -0.58    1.53
  -9   8  -2   -0.45    1.43
   9  -8   2    2.08    1.43
   9  -8   3   25.43    2.78
   9  -9  -6   15.60    2.00
   9  -9  -5   -0.70    1.40
   9  -9  -4   58.78    5.80
   9  -9  -3   -0.03    1.45
  -9  -9   3   -0.45    1.35
   9  -9  -2   30.56    3.40
   9  -9  -2   34.86    3.53
  -9  -9   2   36.88    3.58
   9  -9  -1    9.38    1.40
   9  -9  -1    9.90    1.63
   9  -9   0   16.18    1.95
 -10   0  14    1.25    2.85
 -10   0  13    4.90    3.28
 -10   0  13   -5.48   10.08
 -10   0  12    4.73    3.55
 -10   0  12   -7.13   10.45
 -10   0  11    0.53    2.45
 -10   0  11    3.53    3.43
 -10   0  11   -5.58   10.03
 -10   0  10    6.50    2.58
 -10   0  10    2.85    3.35
 -10   0   9   -1.75    2.90
 -10   0   9   -1.45    3.30
 -10   0   8  216.26   19.70
 -10   0   8  191.78   19.90
 -10   0   7   -0.68    3.98
 -10   0   7    1.48    3.08
 -10   0   6   87.21   14.95
  10   0  -6  174.65   14.33
 -10   0   5   -0.30    4.73
  10   0  -5    0.38    2.03
 -10   0   4   44.38    8.75
  10   0  -4   82.26    7.45
  10   0  -3    0.03    2.18
  10   0  -2   51.03    5.48
 -10   0   1    0.18    4.15
  10   0  -1    1.13    2.18
 -10   0   0  118.87   10.68
  10   0   0   94.72    9.93
 -10   0  -1    0.85    3.25
  10   0   1   -0.05    2.15
 -10   0  -2  208.16   19.80
 -10   0  -3   -1.93    2.28
 -10   0  -4   94.87   10.20
  10   0   4  124.22   10.35
 -10   0  -5   -0.50    1.30
  10   0   5   -1.58    1.73
  10   0   6  152.78   14.38
  10   0   7    1.00    0.93
 -10   1  15   -0.98    2.30
 -10   1  14   21.78    3.83
 -10  -1  13    1.23    3.03
 -10   1  13   -2.78    3.33
 -10  -1  12   32.46    4.63
 -10   1  12   25.90    4.65
 -10  -1  12   33.13    4.23
 -10  -1  11    1.10    2.43
 -10  -1  11   -3.38    3.20
 -10   1  11   -1.78    3.50
 -10   1  11   -4.85   10.43
 -10  -1  10   76.96    6.70
 -10   1  10   67.49    6.88
 -10  -1  10   45.81    6.43
 -10   1  10   55.01    6.35
 -10   1  10   45.31   11.73
 -10  -1   9   41.38    4.93
 -10   1   9   36.83    5.05
 -10   1   9   49.48    5.13
 -10  -1   8  182.71   16.63
 -10   1   8  200.86   17.08
 -10   1   7   44.11    5.90
 -10  -1   7   31.48    5.58
 -10  -1   7   42.08    4.98
 -10  -1   6    6.13    4.53
 -10   1   6    0.05    4.25
 -10  -1   6    6.00    3.15
 -10   1   6    2.38    3.18
  10  -1  -6    4.15    2.00
 -10  -1   5   64.66   11.13
 -10   1   5   65.06   11.03
  10   1  -5  131.80   10.13
 -10   1   5   85.29   10.33
  10  -1  -5  111.69   10.03
 -10   1   4    3.18    4.90
 -10   1   4    5.85    3.38
  10   1  -4    9.25    2.28
  10  -1  -4    6.65    2.23
 -10  -1   3   34.71    7.93
 -10   1   3   43.26    8.43
  10   1  -3   85.29    6.88
  10  -1  -3   67.09    6.80
 -10  -1   2    2.43    4.25
  10   1  -2    0.80    2.03
  10  -1  -2    0.03    2.00
 -10  -1   1  186.58   15.43
  10   1  -1  148.90   14.75
  10  -1  -1  149.30   14.75
 -10  -1   0  155.43   14.03
 -10   1   0  154.85   14.25
  10  -1   0  129.92   13.60
 -10  -1  -1   81.24    8.05
 -10   1  -1   80.96    8.20
  10  -1   1   72.89    7.73
 -10  -1  -2   27.25    3.60
 -10   1  -2   24.50    4.03
 -10  -1  -3   75.06    7.78
 -10   1  -3   77.51    7.95
  10   1   3   85.54    7.85
 -10  -1  -4    0.58    1.45
 -10   1  -4    2.93    1.95
 -10   1  -5   59.38    6.85
  10   1   5   75.06    6.98
  10  -1   5   84.36    7.00
  10   1   6    8.50    1.63
  10  -1   6    9.55    1.78
  10   1   7   19.43    2.10
 -10   2  15   12.00    2.68
 -10   2  14    0.08    2.85
 -10   2  14   -6.20    9.05
 -10   2  13   69.34    7.13
 -10   2  13   40.63   11.50
 -10  -2  12    4.35    2.58
 -10   2  12    4.90    3.35
 -10   2  12   10.13    9.75
 -10  -2  11  208.08   15.80
 -10   2  11  183.03   15.80
 -10   2  11  110.47   18.73
 -10  -2  11  117.29   15.65
 -10  -2  10   -0.05    2.43
 -10  -2  10    7.00    3.13
 -10   2  10    1.83   10.13
 -10  -2   9   43.11    5.93
 -10   2   9   41.28    5.88
 -10  -2   8    1.78    3.28
 -10   2   8    3.35    3.28
 -10  -2   8    4.48    2.98
 -10   2   8    2.88    3.28
 -10   2   7  112.09   13.00
 -10   2   7  114.57   12.68
 -10  -2   7   94.64   13.08
 -10  -2   6   -0.18    4.25
 -10   2   6    0.85    4.30
 -10   2   6    0.50    3.28
  10  -2  -6   -0.48    2.03
 -10   2   5    5.33    4.73
 -10   2   5   12.53    3.50
  10  -2  -5   15.95    2.65
 -10  -2   4    2.50    4.30
 -10   2   4    0.23    4.95
 -10   2   4    2.75    3.15
  10  -2  -4    4.73    2.15
 -10  -2   3   23.45    5.23
  10  -2  -3   34.38    3.65
 -10  -2   2   71.21    7.03
 -10   2   2   50.58    7.43
  10  -2  -2   53.01    5.85
 -10  -2   1  121.20   10.55
  10  -2  -1   94.17    9.85
 -10  -2   0  103.04   10.40
  10   2   0  113.52   10.13
  10  -2   0   94.99   10.05
 -10  -2  -1   54.76    6.00
 -10   2  -1   54.73    6.55
  10   2   1   56.63    5.83
 -10  -2  -2   42.18    4.83
 -10   2  -2   42.83    5.43
  10   2   2   49.26    4.88
 -10  -2  -3    0.45    1.68
 -10   2  -3    1.95    2.48
  10   2   3    1.30    1.85
  10  -2   3    1.38    1.93
 -10   2  -4   22.70    3.15
  10   2   4   26.53    3.03
 -10   2  -5    5.85    1.68
  10  -2   5    6.58    1.85
 -10   2  -6    0.18    1.08
  10   2   6   -0.80    1.13
  10  -2   6    0.70    1.35
  10   2   7    2.53    1.05
 -10   3  15    4.85    2.00
 -10   3  14   35.41    4.43
 -10   3  13    1.03    2.88
 -10   3  13    6.65    8.05
 -10   3  12   51.58   10.20
 -10  -3  11   16.93    3.30
 -10   3  11   16.40    9.10
 -10  -3  10   20.55    3.90
 -10   3  10   34.16    4.38
 -10   3   9   98.49    8.53
 -10  -3   9   62.69    8.40
 -10   3   8   28.85    6.70
 -10   3   8   76.14    7.05
  10  -3  -8   98.32    6.60
 -10  -3   8   43.56    7.15
 -10   3   7    0.80    3.25
 -10   3   7   -0.98    3.23
 -10   3   6   66.56    9.65
 -10   3   6  110.04    9.38
 -10  -3   5    0.15    3.78
 -10   3   5   -0.05    4.13
 -10   3   5    0.80    3.08
 -10   3   4   37.66    8.08
 -10   3   4   82.16    7.45
  10  -3  -4   86.94    7.08
 -10  -3   4   42.03    7.68
  10   3  -3   28.05    3.28
 -10  -3   3   25.10    4.50
  10  -3  -3   20.63    3.23
 -10   3   2  118.62   11.85
  10   3  -2  121.60   10.85
  10  -3  -2   98.54   10.80
 -10  -3   2  115.72   11.33
 -10  -3   1    2.50    3.15
 -10   3   1    0.63    4.23
  10   3  -1    2.25    2.23
  10  -3  -1    1.05    2.10
 -10   3   0  108.52   10.95
  10   3   0  106.99   10.18
 -10  -3   0   99.89   10.35
 -10  -3  -1   13.50    2.55
  10   3   1   11.90    2.50
  10  -3   1   12.40    2.05
 -10   3  -2   33.93    4.20
  10   3   2   30.18    3.38
  10  -3   2   30.03    3.45
  10  -3   2   25.80    3.05
 -10  -3  -2   23.53    3.10
 -10   3  -3    3.20    2.53
  10   3   3    1.65    1.70
  10  -3   3    3.03    1.90
  10  -3   3    0.68    1.38
  10   3   4    6.85    1.63
 -10   3  -4    6.20    2.08
 -10   3  -5   22.43    3.00
  10  -3   5   32.08    3.08
 -10   3  -6    0.83    1.05
  10  -3   6    1.88    1.10
 -10   4  13   22.23    3.30
 -10   4  12    8.40    2.80
 -10  -4  11    3.13    2.80
 -10   4  11    6.53    2.85
 -10  -4  10    4.15    3.08
 -10   4  10    2.95    3.00
 -10   4   9   56.16    5.83
 -10  -4   9   42.96    6.05
 -10   4   8    3.63    2.98
 -10   4   7   39.56    7.88
 -10   4   7  143.77    8.30
 -10  -4   6    8.10    3.50
 -10   4   6    9.50    3.50
 -10   4   6   17.70    3.28
 -10   4   5   53.63    9.78
 -10  -4   5   77.51    9.80
 -10  -4   4   15.18    3.70
 -10   4   4    5.70    4.18
 -10   4   4   12.28    3.20
 -10   4   3   36.31    5.53
  10  -4  -3   33.81    4.08
  10  -4  -3   33.23    3.80
 -10  -4   3   42.31    4.88
 -10   4   2   69.54    7.35
  10   4  -2   68.66    6.25
  10  -4  -2   55.78    6.30
  10  -4  -2   55.48    6.10
 -10  -4   2   66.91    6.68
 -10  -4   1   14.98    2.98
  10   4  -1   18.58    2.60
 -10   4   1   17.28    4.50
  10  -4  -1   14.35    2.35
  10   4   0   33.66    3.60
  10  -4   0   28.25    3.43
 -10  -4   0   28.40    3.68
 -10  -4  -1    0.45    1.53
  10   4   1    1.00    1.73
 -10   4  -1   -3.13    3.40
  10  -4   1    0.18    1.88
  10  -4   1    0.93    1.60
  10   4   2    5.75    1.73
  10  -4   2    7.43    2.03
  10  -4   2    7.65    1.70
  10   4   3   -1.85    1.35
 -10   4  -3   -0.63    2.40
  10  -4   3   -0.88    1.70
  10  -4   3   -1.38    1.48
  10   4   4   76.14    7.75
 -10   4  -4   79.49    7.95
  10  -4   4   87.16    7.75
 -10   4  -5    1.80    1.43
  10  -4   5    0.33    1.35
  10   4   6   27.53    3.25
  10   4   6   36.36    3.23
 -10   5  13    1.43    1.78
 -10   5  12    8.48    2.28
 -10   5  11   10.88    2.58
 -10   5  10   20.90    3.28
 -10   5   9   43.26    4.95
 -10   5   8    9.00    2.78
 -10  -5   7   10.65    3.53
 -10   5   7   21.75    3.20
 -10  -5   6    6.08    3.13
 -10   5   6    9.68    2.75
 -10   5   5   25.80    4.10
 -10   5   5   25.05    3.80
  10  -5  -5   29.68    3.38
 -10  -5   5   35.88    4.28
 -10  -5   4    0.50    2.70
 -10   5   4    2.60    3.18
  10  -5  -4    0.33    1.85
 -10   5   3   83.26    8.23
  10  -5  -3   74.49    7.50
 -10  -5   3   76.34    7.83
 -10  -5   2    0.95    2.10
 -10   5   2   -3.53    3.48
  10  -5  -2    0.48    1.93
  10  -5  -2   -0.93    1.73
 -10   5   1   63.41    6.23
  10  -5  -1   53.28    5.28
 -10  -5   1   46.91    5.30
 -10   5   0   11.58    3.35
  10  -5   0    8.30    2.08
  10  -5   0   11.95    1.98
 -10   5  -1   13.58    3.30
  10  -5   1   11.13    2.08
  10  -5   1   11.63    1.98
 -10   5  -2    9.73    2.75
  10  -5   2   10.55    2.03
  10  -5   2    9.40    1.85
  10  -5   3   34.31    3.53
  10  -5   3   31.53    3.45
 -10   5  -4    2.85    1.65
  10  -5   4    1.85    1.18
 -10   5  -5   44.06    4.35
 -10   6  11    8.13    1.73
 -10   6  10    8.18    1.93
 -10   6   9    0.70    1.80
 -10  -6   8   17.83    3.95
 -10   6   8   27.90    3.13
 -10  -6   7   -3.00    2.98
 -10   6   7    0.33    1.80
  10  -6  -6   26.35    3.18
 -10  -6   6   32.56    4.10
 -10  -6   5    1.80    2.60
  10  -6  -5    0.75    1.70
 -10   6   4   47.91    5.63
  10  -6  -4   56.48    5.53
 -10  -6   4   58.53    5.78
 -10  -6   3    0.28    1.98
 -10   6   3   -1.00    2.38
  10  -6  -3    1.35    1.80
 -10   6   2  139.12   13.15
  10  -6  -2  145.62   12.93
 -10  -6   2  126.30   12.90
 -10   6   1    1.43    2.40
  10  -6  -1    2.70    1.78
  10  -6  -1    3.90    1.70
 -10   6   0   23.48    3.55
  10  -6   0   25.88    3.10
  10  -6   0   25.70    3.03
 -10  -6   0   31.21    3.20
 -10  -6  -1    4.13    1.63
 -10   6  -1    4.28    2.23
  10  -6   1    2.60    1.55
  10  -6   1    2.95    1.45
 -10   6  -2   47.63    5.33
  10  -6   2   58.08    5.15
  10  -6   2   50.63    5.10
 -10  -6  -2   49.36    5.10
 -10   6  -3    1.13    1.53
  10  -6   3    2.28    1.13
  10  -6   3    2.15    1.18
  10  -7  -7   12.65    1.80
  10  -7  -6   10.30    1.78
  10  -7  -5   10.28    1.88
  10  -7  -4   11.23    1.98
  10  -7  -3   13.98    2.08
 -10   7   2    1.28    1.35
  10  -7  -2    1.33    1.55
  10  -7  -2    1.58    1.48
 -10   7   1    2.35    1.53
  10  -7  -1    2.70    1.45
  10  -7  -1    3.43    1.43
 -10   7   0    2.88    1.50
  10  -7   0    2.75    1.30
  10  -7   0    2.18    1.30
 -10   7  -1    0.30    1.33
  10  -7   1    2.10    1.20
  10  -7   1    1.38    1.18
  10  -8  -5   14.70    1.85
  10  -8  -4    5.05    1.23
  10  -8  -3    3.73    1.25
  10  -8  -3    4.55    1.18
  10  -8  -2   -0.23    0.98
  10  -8  -1   19.95    2.15
 -11   0  12   39.66    4.68
 -11   0  11   -0.85    1.98
 -11   0  11   -0.03    2.60
 -11   0  10  108.64    9.33
 -11   0  10   78.89    9.23
 -11   0   9   -2.00    2.65
 -11   0   9   -1.63    2.75
 -11   0   8   16.33    3.98
 -11   0   8   22.53    3.40
 -11   0   7   -0.18    3.28
 -11   0   6   23.08    4.55
 -11   0   5   -0.83    3.85
  11   0  -5    0.40    1.83
 -11   0   4   27.43    7.10
  11   0  -4   70.99    6.13
  11   0  -3    0.10    1.80
 -11   0   2  283.10   25.70
  11   0  -2  264.54   25.28
 -11   0   1    0.70    3.10
 -11   0   0   98.74    9.85
 -11   0  -1   -1.33    2.20
 -11   0  -2  112.87   11.93
  11   0   2  139.10   11.95
 -11   0  -3    0.50    1.35
  11   0   5   -0.75    0.88
 -11   1  13   17.60    2.95
 -11   1  12   21.73    3.40
 -11  -1  11    6.83    2.40
 -11   1  11    7.05    2.68
 -11  -1  10    1.45    2.48
 -11   1  10    0.35    1.95
 -11   1  10    4.60    2.73
 -11  -1   9   55.03    5.55
 -11   1   9   39.88    5.23
 -11  -1   8    6.03    3.30
 -11   1   8    8.15    3.20
 -11  -1   7   30.88    4.75
 -11   1   7   26.58    4.53
 -11  -1   6    2.43    3.48
 -11   1   6    1.70    3.70
  11  -1  -6    5.40    2.00
 -11   1   5   32.03    6.35
 -11  -1   5   33.81    6.38
 -11   1   4   -0.90    3.73
  11  -1  -4    2.40    2.00
 -11  -1   3   85.61    8.40
 -11   1   3   65.36    8.35
  11  -1  -3   75.74    7.50
 -11  -1   2    3.30    3.30
  11  -1  -2    1.18    1.83
 -11  -1   1   82.44    8.20
 -11   1   1   82.01    8.38
  11  -1  -1   76.74    7.78
  11   1   0   19.60    2.65
 -11  -1   0   18.45    3.13
 -11   1   0   20.83    3.48
  11  -1   0   17.03    2.53
 -11  -1  -1   57.51    6.03
 -11   1  -1   59.06    6.15
  11   1   1   59.61    5.88
 -11  -1  -2    5.98    1.78
 -11   1  -2    6.18    1.98
  11   1   2    5.38    1.68
 -11   1  -3   37.18    3.90
  11   1   3   44.06    3.93
 -11  -1  -3   33.78    3.75
  11  -1   4   16.00    1.80
 -11   1  -4   10.03    1.58
  11   1   5   26.48    2.78
  11  -1   5   29.93    2.83
 -11   2  13   14.88    2.70
 -11   2  12    5.05    2.55
 -11  -2  11    7.58    2.58
 -11  -2  10    0.18    2.43
 -11   2   9   74.54    5.03
 -11  -2   9   52.46    5.20
 -11  -2   8    6.28    3.10
 -11   2   8    5.18    2.63
 -11   2   8    7.83    2.80
 -11  -2   7    9.30    3.50
 -11   2   7   10.75    3.40
 -11   2   7   13.53    2.95
 -11   2   6    2.70    3.50
 -11   2   6    4.70    2.88
  11  -2  -6    7.90    1.98
 -11   2   5    1.23    3.38
  11  -2  -5    0.80    1.83
 -11  -2   4   15.43    4.03
 -11   2   4   10.68    4.38
  11  -2  -4   25.60    2.83
 -11  -2   3   16.30    3.73
 -11   2   3   14.65    4.13
  11   2  -3   15.40    2.53
  11  -2  -3   15.70    2.43
 -11   2   2   48.18    5.83
  11   2  -2   48.83    4.93
  11  -2  -2   43.38    4.93
 -11  -2   2   47.63    5.55
 -11  -2   1    3.63    2.68
  11   2  -1    4.45    1.90
  11  -2  -1    4.03    1.85
  11   2   0  102.12    9.25
  11  -2   0   94.34    9.25
 -11  -2   0   89.11    9.38
 -11  -2  -1    1.25    1.63
 -11   2  -1    0.75    2.30
  11   2   1    2.35    1.60
 -11  -2  -2    8.75    1.53
 -11   2  -2    8.85    2.20
  11   2   2   10.63    1.73
  11   2   3   13.40    1.78
 -11   2  -3   11.43    2.00
 -11   2  -4   10.95    1.63
  11   2   4   11.23    1.53
  11  -2   4   14.53    1.73
 -11  -3  11    4.33    2.40
 -11   3  11    2.60    2.35
 -11   3  10   66.01    5.88
 -11  -3  10   40.53    6.05
 -11  -3   9    4.08    2.90
 -11   3   9    3.73    2.55
 -11   3   8   14.40    3.65
 -11  -3   8   37.66    4.65
 -11   3   7    3.78    2.50
 -11   3   7    0.18    2.53
  11  -3  -7    0.68    1.55
 -11   3   6   25.90    3.58
  11  -3  -6   30.26    3.00
 -11  -3   5   10.23    3.40
 -11   3   5    7.23    3.60
 -11  -3   4    1.48    3.10
 -11   3   4    1.93    3.38
  11  -3  -4    0.48    1.68
 -11  -3   3    0.58    2.88
 -11   3   3    2.68    3.40
  11  -3  -3    1.00    1.68
  11   3  -2   24.40    2.80
 -11  -3   2   19.70    3.40
 -11   3   2   24.48    4.00
  11  -3  -2   20.88    2.83
 -11  -3   1    3.75    2.15
 -11   3   1    3.23    2.98
  11   3  -1    2.90    1.65
  11  -3  -1    3.58    1.80
 -11  -3   0    3.38    1.75
  11   3   0    5.23    1.60
  11  -3   0    5.28    1.80
 -11  -3  -1    6.70    1.48
  11   3   1    9.78    1.60
  11   3   2    1.43    1.13
 -11   3  -2    1.50    1.88
  11   3   3    0.75    0.95
 -11   3  -3    1.00    1.48
  11  -3   4    1.40    0.95
 -11   4  12    1.53    1.70
 -11   4  11   12.83    2.35
 -11   4  10   40.06    4.10
 -11  -4  10   27.90    4.60
 -11  -4   9    6.78    3.15
 -11   4   9   10.95    2.43
 -11   4   8   31.11    3.78
 -11   4   7   16.70    2.88
  11  -4  -7   18.68    2.40
 -11   4   6   68.39    6.75
  11  -4  -6   80.34    6.48
 -11  -4   5    9.68    2.80
 -11   4   5    9.63    2.83
  11  -4  -5    9.80    1.95
 -11   4   4  103.67    9.78
  11  -4  -4   95.14    9.33
 -11  -4   4   95.64    9.58
 -11  -4   3   12.13    2.43
 -11   4   3   15.35    3.15
  11  -4  -3   11.13    2.05
 -11   4   2   58.46    5.65
  11  -4  -2   51.51    5.03
 -11  -4   2   42.98    5.08
 -11  -4   1    0.58    1.48
  11   4  -1    0.60    1.20
 -11   4   1   -1.03    2.48
  11  -4  -1    1.15    1.53
  11   4   0   15.43    1.88
 -11   4   0   18.58    2.78
 -11  -4   0   12.85    1.83
 -11   4  -1    4.15    1.93
  11  -4   1    5.55    1.53
 -11   4  -3    6.40    1.38
 -11   5  10    9.03    1.70
 -11   5   9   42.11    4.35
 -11  -5   8    0.68    2.55
  11  -5  -8    0.23    1.18
  11  -5  -7   47.21    4.10
 -11  -5   7   21.30    4.63
 -11  -5   6    7.45    2.50
  11  -5  -6    6.98    1.65
 -11   5   5   40.33    4.73
  11  -5  -5   46.56    4.68
 -11  -5   5   52.83    5.08
 -11  -5   4   10.38    2.25
 -11   5   4   11.23    2.40
  11  -5  -4   10.48    1.93
 -11   5   3  129.72   12.08
  11  -5  -3  124.55   11.90
 -11  -5   3  124.22   11.95
 -11  -5   2    1.58    1.38
 -11   5   2    2.55    2.05
  11  -5  -2    1.85    1.40
 -11   5   1   21.30    2.90
 -11   5   0   12.93    2.33
  11  -5   0   15.50    2.03
 -11   5  -1    7.18    1.68
  11  -5   1    7.13    1.40
 -11   5  -2    3.43    1.30
  11  -6  -7    0.18    1.08
  11  -6  -6   45.08    4.48
 -11  -6   5    0.95    1.75
  11  -6  -5    0.25    1.23
  11  -6  -4   82.74    7.88
 -11  -6   4   81.66    7.90
  11  -6  -3    9.80    1.60
 -11   6   2   67.41    6.50
 -11   6   1   13.43    2.03
  11  -6  -1   19.00    2.00
  11  -6   0   24.95    2.65
  11  -7  -4    1.00    0.83
 -12   0  10   23.55    2.78
 -12   0   9    1.00    1.80
 -12   0   8   17.05    2.75
 -12   0   7    0.83    2.38
 -12   0   6   26.98    3.85
 -12   0   5    0.08    2.55
  12   0  -4   83.01    7.88
 -12   0   4   78.71    8.33
  12   0  -3   -0.43    1.45
 -12   0   2  128.25   12.55
  12   0  -2  131.15   12.30
 -12   0   1    1.38    1.93
  12   0  -1   -0.05    1.28
  12   0   0   16.90    2.08
 -12   0   0   16.83    2.35
 -12   0  -1    0.10    1.15
  12   0   1   -0.35    1.05
  12   0   2    9.80    1.28
 -12  -1  10    1.18    1.80
 -12   1   9   14.40    2.23
 -12  -1   9   19.88    2.73
 -12  -1   8    1.25    2.10
 -12   1   8    0.38    1.75
 -12  -1   7    8.10    2.43
 -12   1   7    7.55    2.48
 -12  -1   6    1.13    2.43
 -12   1   6   -0.65    2.38
 -12   1   5   14.60    3.13
 -12   1   4    6.65    2.85
 -12   1   3   49.76    5.60
  12   1  -3   51.08    5.00
 -12  -1   3   49.41    5.40
 -12  -1   2    0.75    1.98
  12   1  -2    0.63    1.30
 -12   1   1   21.28    2.88
  12   1  -1   21.98    2.43
 -12  -1   1   18.85    2.63
 -12  -1   0    4.68    1.38
 -12   1   0    5.30    1.75
  12   1   0    4.88    1.23
  12  -1   0    4.40    1.35
 -12   1  -1    2.83    1.30
  12   1   1    2.58    0.98
  12  -1   1    3.15    1.13
  12  -1   2    3.40    0.95
 -12  -2  10    6.53    2.10
 -12  -2   9    0.13    2.03
 -12  -2   8    8.73    2.45
 -12   2   8    7.63    1.70
 -12  -2   7    3.13    2.15
 -12   2   7    1.95    1.93
 -12   2   6    1.48    2.13
  12  -2  -5   31.13    3.30
 -12   2   5   31.36    4.00
 -12   2   4   31.78    3.85
  12  -2  -4   27.70    3.03
 -12  -2   4   25.15    3.60
 -12   2   3   44.21    4.68
  12  -2  -3   40.83    4.13
 -12  -2   3   38.61    4.48
 -12  -2   2    6.30    1.95
 -12   2   2    7.13    2.23
  12   2  -1   12.23    1.55
 -12  -2   1   10.63    1.83
 -12   2   0   18.48    2.33
  12   2   0   17.25    1.88
 -12  -2   0   15.35    1.93
 -12   2  -1    7.63    1.50
  12  -2   1    9.33    1.35
 -12  -3  10    4.20    1.95
 -12  -3   9   -0.13    1.95
 -12  -3   8   -0.73    2.00
 -12  -3   6   -0.38    1.98
 -12   3   6   -0.68    1.73
  12  -3  -6    0.48    1.08
 -12  -3   5   10.88    2.35
 -12   3   5   12.18    2.43
  12  -3  -5   13.50    1.83
 -12  -3   4    5.68    1.93
 -12   3   4    8.20    2.28
  12  -3  -4    5.20    1.43
 -12  -3   3    2.10    1.58
 -12   3   3    4.15    2.00
  12  -3  -3    2.83    1.28
 -12  -3   2    6.98    1.55
 -12   3   2    8.38    2.10
  12  -3  -2    9.68    1.48
 -12  -3   1    2.10    1.00
 -12   3   1    4.53    1.63
 -12  -4   7   -0.50    1.88
 -12  -4   6   41.46    4.43
 -12  -4   5    7.53    1.83
 -12   4   5    5.15    1.43
  12  -4  -5    6.75    1.35
 -12   4   4  109.92   10.90
  12  -4  -4  124.25   10.83
 -12  -4   4  107.49   10.88
 -12  -4   3    0.55    1.20
 -12   4   3    2.20    1.58
  12  -4  -3    1.45    1.15
 -12   4   2   36.68    3.98
  12  -4  -2   39.91    3.85
 -12   4   1   13.78    1.83
 -13   0   6   35.38    3.63
 -13   0   5    0.08    1.20
 -13   0   3   -0.10    1.03
 -13  -1   6    4.45    1.33
 -13   1   5   11.18    1.63
 -13  -1   4   18.88    2.10
 -13   1   4   17.58    2.15
   0   0   0    0.00    0.00


_computing_structure_solution     'SHELXT 2014/5 (Sheldrick, 2014)'
_computing_structure_solution     'SHELXT 2014/5 (Sheldrick, 2014)'
;
_shelx_hkl_checksum                37183
_olex2_submission_special_instructions  'No special instructions were received'
