# Supplementary material
Source: publisher figshare collection journal article supplement (https://acs.figshare.com/ndownloader/files/18064346)
Supplement: Supplementary file 1 [file 18064346 › NKU-FlexMOF-1a-C3H8.cif]

data_NKU-FlexMOF-1a-C3H8
_audit_creation_date               2018-11-23
_audit_creation_method
;
Olex2 1.2
(compiled 2018.05.29 svn.r3508 for OlexSys, GUI svn.r5506)
;
_shelx_SHELXL_version_number       '2014/7'
_audit_contact_author_address      ?
_audit_contact_author_email        ?
_audit_contact_author_name         ''
_audit_contact_author_phone        ?
_publ_contact_author_id_orcid      ?
_publ_section_references
;
Dolomanov, O.V., Bourhis, L.J., Gildea, R.J, Howard, J.A.K. & Puschmann, H.
 (2009), J. Appl. Cryst. 42, 339-341.

Sheldrick, G.M. (2015). Acta Cryst. A71, 3-8.

Sheldrick, G.M. (2015). Acta Cryst. C71, 3-8.
;
_chemical_name_common              ?
_chemical_name_systematic          ?
_chemical_formula_moiety           'C13 H6 Cu F N O4, C1.5 H5'
_chemical_formula_sum              'C29 H22 Cu2 F2 N2 O8'
_chemical_formula_weight           691.59
_chemical_melting_point            ?
loop_
  _atom_type_symbol
  _atom_type_description
  _atom_type_scat_dispersion_real
  _atom_type_scat_dispersion_imag
  _atom_type_scat_source
 'C' 'C' 0.0181 0.0091 'International Tables Vol C Tables 4.2.6.8 and 6.1.1.4'
 'H' 'H' 0.0000 0.0000 'International Tables Vol C Tables 4.2.6.8 and 6.1.1.4'
 'Cu' 'Cu' -1.9646 0.5888
 'International Tables Vol C Tables 4.2.6.8 and 6.1.1.4'
 'F' 'F' 0.0727 0.0534 'International Tables Vol C Tables 4.2.6.8 and 6.1.1.4'
 'N' 'N' 0.0311 0.0180 'International Tables Vol C Tables 4.2.6.8 and 6.1.1.4'
 'O' 'O' 0.0492 0.0322 'International Tables Vol C Tables 4.2.6.8 and 6.1.1.4'

_shelx_space_group_comment
;
The symmetry employed for this shelxl refinement is uniquely defined
by the following loop, which should always be used as a source of
symmetry information in preference to the above space-group names.
They are only intended as comments.
;
_space_group_crystal_system        'monoclinic'
_space_group_IT_number             14
_space_group_name_H-M_alt          'P 1 21/c 1'
_space_group_name_Hall             '-P 2ybc'
loop_
  _space_group_symop_operation_xyz
 'x, y, z'
 '-x, y+1/2, -z+1/2'
 '-x, -y, -z'
 'x, -y-1/2, z-1/2'

_cell_length_a                     10.5743(7)
_cell_length_b                     10.6558(7)
_cell_length_c                     15.2273(12)
_cell_angle_alpha                  90
_cell_angle_beta                   108.493(8)
_cell_angle_gamma                  90
_cell_volume                       1627.2(2)
_cell_formula_units_Z              2
_cell_measurement_reflns_used      3694
_cell_measurement_temperature      298(20)
_cell_measurement_theta_max        73.6900
_cell_measurement_theta_min        5.1100
_shelx_estimated_absorpt_T_max     1.000
_shelx_estimated_absorpt_T_min     0.303
_exptl_absorpt_coefficient_mu      2.131
_exptl_absorpt_correction_T_max    1.00000
_exptl_absorpt_correction_T_min    0.30276
_exptl_absorpt_correction_type     multi-scan
_exptl_absorpt_process_details
;
CrysAlisPro 1.171.39.7e (Rigaku Oxford Diffraction, 2015)
Empirical absorption correction using spherical harmonics,
 implemented in SCALE3 ABSPACK scaling algorithm.
;
_exptl_absorpt_special_details     ?
_exptl_crystal_colour              BLUE
_exptl_crystal_density_diffrn      1.411
_exptl_crystal_density_meas        ?
_exptl_crystal_density_method      ?
_exptl_crystal_description         rhombus
_exptl_crystal_F_000               700
_exptl_crystal_size_max            0.2
_exptl_crystal_size_mid            0.15
_exptl_crystal_size_min            0.1
_exptl_transmission_factor_max     ?
_exptl_transmission_factor_min     ?
_diffrn_reflns_av_R_equivalents    0.0795
_diffrn_reflns_av_unetI/netI       0.0910
_diffrn_reflns_Laue_measured_fraction_full  0.991
_diffrn_reflns_Laue_measured_fraction_max  0.963
_diffrn_reflns_limit_h_max         9
_diffrn_reflns_limit_h_min         -13
_diffrn_reflns_limit_k_max         13
_diffrn_reflns_limit_k_min         -12
_diffrn_reflns_limit_l_max         18
_diffrn_reflns_limit_l_min         -11
_diffrn_reflns_number              8741
_diffrn_reflns_point_group_measured_fraction_full  0.991
_diffrn_reflns_point_group_measured_fraction_max  0.963
_diffrn_reflns_theta_full          67.684
_diffrn_reflns_theta_max           74.210
_diffrn_reflns_theta_min           4.409
_diffrn_ambient_environment        air
_diffrn_ambient_temperature        298(20)
_diffrn_detector                   'CCD plate'
_diffrn_detector_area_resol_mean   ?
_diffrn_measured_fraction_theta_full  0.991
_diffrn_measured_fraction_theta_max  0.963
_diffrn_measurement_details
;
List of Runs (angles in degrees, time in seconds):

  # Type    Start    End  Width  t~exp~   \w     \q     \k     \f   Frames
--------------------------------------------------------------------------
  1  \w    -27.00  19.00   0.50    6.92    --    0.00  82.00-180.00   92
  2  \w      5.00  48.00   0.50    6.92    --    0.00  77.00   0.00   86
  3  \w      2.00  29.00   0.50    6.92    --    0.00  38.00  90.00   54
  4  \w    -19.00  34.00   0.50    6.92    --    0.00  82.00 -90.00  106
  5  \w    -31.00  32.00   0.50    6.92    --    0.00  82.00  60.00  126
  6  \w    155.00 180.00   0.50   27.67    --   94.30  82.00-120.00   50
  7  \w     11.00  94.00   0.50   27.67    --   94.30 -61.00 -60.00  166
  8  \w    112.00 183.00   0.50   27.67    --   94.30  82.00 120.00  142
  9  \w     77.00 156.00   0.50   27.67    --   94.30  45.00  90.00  158
 10  \w    113.00 160.00   0.50   27.67    --   94.30  82.00  90.00   94
 11  \w     13.00 105.00   0.50   27.67    --   94.30 -61.00-150.00  184
 12  \w    106.00 184.00   0.50   27.67    --   94.30  77.00 -30.00  156
 13  \w     80.00 173.00   0.50   27.67    --   94.30  45.00  60.00  186
;
_diffrn_measurement_device         'four-circle diffractometer'
_diffrn_measurement_device_type    'XtaLAB Pro: Kappa single'
_diffrn_measurement_method         '\w scans'
_diffrn_orient_matrix_type        
 'CrysAlisPro convention (1999,Acta A55,543-557)'
_diffrn_orient_matrix_UB_11        0.1476279000
_diffrn_orient_matrix_UB_12        -0.0325765000
_diffrn_orient_matrix_UB_13        0.0489599000
_diffrn_orient_matrix_UB_21        0.0425584000
_diffrn_orient_matrix_UB_22        0.1164470000
_diffrn_orient_matrix_UB_23        -0.0435823000
_diffrn_orient_matrix_UB_31        -0.0020351000
_diffrn_orient_matrix_UB_32        0.0793197000
_diffrn_orient_matrix_UB_33        0.0841168000
_diffrn_radiation_monochromator    graphite
_diffrn_radiation_probe            x-ray
_diffrn_radiation_type             CuK\a
_diffrn_radiation_wavelength       1.54184
_diffrn_source                     'fine-focus sealed X-ray tube'
_diffrn_source_type                'Enhance (Cu) X-ray Source'
_reflns_Friedel_coverage           0.000
_reflns_Friedel_fraction_full      .
_reflns_Friedel_fraction_max       .
_reflns_number_gt                  2072
_reflns_number_total               3197
_reflns_odcompleteness_completeness  98.80
_reflns_odcompleteness_iscentric   1
_reflns_odcompleteness_theta       66.97
_reflns_special_details
;
 Reflections were merged by SHELXL according to the crystal
 class for the calculation of statistics and refinement.
 
 _reflns_Friedel_fraction is defined as the number of unique
 Friedel pairs measured divided by the number that would be
 possible theoretically, ignoring centric projections and
 systematic absences.
;
_reflns_threshold_expression       'I > 2\s(I)'
_computing_cell_refinement         'CrysAlisPro 1.171.39.7e (Rigaku OD, 2015)'
_computing_data_collection         'CrysAlisPro 1.171.39.7e (Rigaku OD, 2015)'
_computing_data_reduction          'CrysAlisPro 1.171.39.7e (Rigaku OD, 2015)'
_computing_molecular_graphics      'Olex2 (Dolomanov et al., 2009)'
_computing_publication_material    'Olex2 (Dolomanov et al., 2009)'
_computing_structure_refinement    'ShelXL (Sheldrick, 2015)'
_computing_structure_solution      'ShelXT (Sheldrick, 2015)'
_refine_diff_density_max           1.696
_refine_diff_density_min           -0.806
_refine_diff_density_rms           0.190
_refine_ls_extinction_coef         .
_refine_ls_extinction_method       none
_refine_ls_goodness_of_fit_ref     1.095
_refine_ls_hydrogen_treatment      constr
_refine_ls_matrix_type             full
_refine_ls_number_parameters       210
_refine_ls_number_reflns           3197
_refine_ls_number_restraints       0
_refine_ls_R_factor_all            0.1546
_refine_ls_R_factor_gt             0.1033
_refine_ls_restrained_S_all        1.095
_refine_ls_shift/su_max            0.000
_refine_ls_shift/su_mean           0.000
_refine_ls_structure_factor_coef   Fsqd
_refine_ls_weighting_details      
 'w=1/[\s^2^(Fo^2^)+(0.1510P)^2^+22.0089P] where P=(Fo^2^+2Fc^2^)/3'
_refine_ls_weighting_scheme        calc
_refine_ls_wR_factor_gt            0.3179
_refine_ls_wR_factor_ref           0.3438
_refine_special_details            ?
_olex2_refinement_description
;
1. Fixed Uiso
 At 1.2 times of:
  All C(H) groups, All C(H,H) groups, All C(H,H,H) groups
2. Others
 Fixed Sof: C00L(0.5) H00A(0.5) H00B(0.5) H00C(0.5) C00M(0.5) H00D(0.5)
 H00E(0.5) H00K(0.5) C1(0.5)
3.a Secondary CH2 refined with riding coordinates:
 C1(H1A,H1B)
3.b Aromatic/amide H refined with riding coordinates:
 C009(H009), C00F(H00F), C00G(H00G), C00H(H00H), C00I(H00I), C00J(H00J)
3.c Idealised Me refined as rotating group:
 C00L(H00A,H00B,H00C), C00M(H00D,H00E,H00K)
;
_atom_sites_solution_hydrogens     geom
_atom_sites_solution_primary       direct
_atom_sites_solution_secondary     ?
loop_
  _atom_site_label
  _atom_site_type_symbol
  _atom_site_fract_x
  _atom_site_fract_y
  _atom_site_fract_z
  _atom_site_U_iso_or_equiv
  _atom_site_adp_type
  _atom_site_occupancy
  _atom_site_site_symmetry_order
  _atom_site_calc_flag
  _atom_site_refinement_flags_posn
  _atom_site_refinement_flags_adp
  _atom_site_refinement_flags_occupancy
  _atom_site_disorder_assembly
  _atom_site_disorder_group
 Cu01 Cu 0.09420(13) -0.08515(13) 0.51404(9) 0.0289(5) Uani 1 1 d . . . . .
 O002 O 0.1829(7) -0.0027(7) 0.6322(5) 0.0420(18) Uani 1 1 d . . . . .
 O003 O 0.0194(7) 0.1387(7) 0.6112(5) 0.0411(17) Uani 1 1 d . . . . .
 O004 O 0.0227(7) 0.3283(7) 0.9263(5) 0.0423(18) Uani 1 1 d . . . . .
 O005 O 0.1899(7) 0.4677(7) 0.9578(5) 0.0445(18) Uani 1 1 d . . . . .
 N006 N 0.7743(7) 0.2541(8) 0.9678(6) 0.0349(19) Uani 1 1 d . . . . .
 F007 F 0.8039(8) -0.0787(7) 0.9665(8) 0.095(3) Uani 1 1 d . . . . .
 C008 C 0.1339(9) 0.3667(10) 0.9233(7) 0.035(2) Uani 1 1 d . . . . .
 C009 C 0.3423(9) 0.2675(10) 0.9124(7) 0.036(2) Uani 1 1 d . . . . .
 H009 H 0.3901 0.3108 0.9656 0.043 Uiso 1 1 calc R . . . .
 C00A C 0.1286(9) 0.0898(10) 0.6573(7) 0.034(2) Uani 1 1 d . . . . .
 C00B C 0.4082(9) 0.1849(9) 0.8709(7) 0.033(2) Uani 1 1 d . . . . .
 C00C C 0.2010(9) 0.1473(10) 0.7495(7) 0.035(2) Uani 1 1 d . . . . .
 C00D C 0.2057(9) 0.2857(10) 0.8748(7) 0.033(2) Uani 1 1 d . . . . .
 C00E C 0.5552(9) 0.1658(10) 0.9099(7) 0.034(2) Uani 1 1 d . . . . .
 C00F C 0.3377(10) 0.1243(10) 0.7903(7) 0.037(2) Uani 1 1 d . . . . .
 H00F H 0.3809 0.0679 0.7629 0.045 Uiso 1 1 calc R . . . .
 C00G C 0.6414(9) 0.2662(10) 0.9337(7) 0.034(2) Uani 1 1 d . . . . .
 H00G H 0.6056 0.3467 0.9257 0.041 Uiso 1 1 calc R . . . .
 C00H C 0.1361(9) 0.2253(10) 0.7932(6) 0.035(2) Uani 1 1 d . . . . .
 H00H H 0.0446 0.2375 0.7678 0.042 Uiso 1 1 calc R . . . .
 C00I C 0.8256(10) 0.1388(11) 0.9783(9) 0.048(3) Uani 1 1 d . . . . .
 H00I H 0.9176 0.1286 1.0015 0.057 Uiso 1 1 calc R . . . .
 C00J C 0.6104(11) 0.0468(11) 0.9211(9) 0.051(3) Uani 1 1 d . . . . .
 H00J H 0.5565 -0.0240 0.9055 0.062 Uiso 1 1 calc R . . . .
 C00K C 0.7465(11) 0.0360(12) 0.9558(11) 0.060(4) Uani 1 1 d . . . . .
 C00L C 0.589(5) 0.092(3) 0.656(3) 0.106(15) Uani 0.5 1 d . . P . .
 H00A H 0.5962 0.0720 0.5964 0.127 Uiso 0.5 1 calc GR . P . .
 H00B H 0.5022 0.0680 0.6579 0.127 Uiso 0.5 1 calc GR . P . .
 H00C H 0.6560 0.0470 0.7031 0.127 Uiso 0.5 1 calc GR . P . .
 C00M C 0.747(3) 0.217(7) 0.710(3) 0.17(3) Uani 0.5 1 d . . P . .
 H00D H 0.7745 0.1316 0.7234 0.203 Uiso 0.5 1 calc GR . P . .
 H00E H 0.7753 0.2654 0.7664 0.203 Uiso 0.5 1 calc GR . P . .
 H00K H 0.7867 0.2512 0.6667 0.203 Uiso 0.5 1 calc GR . P . .
 C1 C 0.607(3) 0.223(3) 0.6722(19) 0.079(10) Uani 0.5 1 d . . P . .
 H1A H 0.5777 0.2714 0.6155 0.094 Uiso 1 1 calc R . . . .
 H1B H 0.5647 0.2535 0.7159 0.094 Uiso 1 1 calc R . . . .

loop_
  _atom_site_aniso_label
  _atom_site_aniso_U_11
  _atom_site_aniso_U_22
  _atom_site_aniso_U_33
  _atom_site_aniso_U_23
  _atom_site_aniso_U_13
  _atom_site_aniso_U_12
 Cu01 0.0240(7) 0.0336(8) 0.0293(8) 0.0000(6) 0.0087(5) 0.0009(6)
 O002 0.033(4) 0.051(5) 0.039(4) -0.012(3) 0.008(3) 0.003(3)
 O003 0.037(4) 0.053(4) 0.031(4) -0.009(3) 0.009(3) 0.006(3)
 O004 0.034(4) 0.048(4) 0.047(4) -0.015(4) 0.017(3) -0.001(3)
 O005 0.031(4) 0.050(4) 0.054(5) -0.016(4) 0.015(3) -0.004(3)
 N006 0.024(4) 0.033(4) 0.045(5) 0.001(4) 0.007(3) -0.006(3)
 F007 0.047(4) 0.041(4) 0.183(11) 0.012(5) 0.017(5) 0.008(3)
 C008 0.029(5) 0.043(6) 0.033(5) -0.007(4) 0.009(4) 0.002(4)
 C009 0.028(5) 0.042(6) 0.034(5) -0.010(4) 0.007(4) 0.000(4)
 C00A 0.028(4) 0.046(6) 0.028(5) -0.002(4) 0.010(4) -0.002(4)
 C00B 0.029(5) 0.037(5) 0.033(5) -0.009(4) 0.009(4) 0.000(4)
 C00C 0.023(4) 0.043(6) 0.039(6) -0.007(5) 0.010(4) -0.002(4)
 C00D 0.030(5) 0.044(6) 0.029(5) -0.005(4) 0.013(4) -0.003(4)
 C00E 0.023(4) 0.045(6) 0.036(5) -0.004(4) 0.010(4) -0.001(4)
 C00F 0.033(5) 0.047(6) 0.028(5) -0.014(4) 0.005(4) -0.005(4)
 C00G 0.028(5) 0.040(5) 0.033(5) -0.006(4) 0.008(4) 0.001(4)
 C00H 0.027(5) 0.051(6) 0.026(5) -0.005(4) 0.006(4) 0.000(4)
 C00I 0.024(5) 0.044(6) 0.071(8) 0.005(6) 0.010(5) 0.003(4)
 C00J 0.031(5) 0.042(6) 0.076(9) -0.008(6) 0.010(5) -0.003(5)
 C00K 0.032(6) 0.041(6) 0.096(11) 0.005(7) 0.006(6) 0.008(5)
 C00L 0.17(4) 0.08(2) 0.11(3) 0.03(2) 0.12(3) 0.05(3)
 C00M 0.046(18) 0.40(9) 0.07(2) -0.10(4) 0.025(17) -0.02(3)
 C1 0.12(3) 0.10(3) 0.039(15) 0.010(15) 0.054(17) 0.03(2)

_geom_special_details
;
 All esds (except the esd in the dihedral angle between two l.s. planes)
 are estimated using the full covariance matrix.  The cell esds are taken
 into account individually in the estimation of esds in distances, angles
 and torsion angles; correlations between esds in cell parameters are only
 used when they are defined by crystal symmetry.  An approximate (isotropic)
 treatment of cell esds is used for estimating esds involving l.s. planes.
;
loop_
  _geom_bond_atom_site_label_1
  _geom_bond_atom_site_label_2
  _geom_bond_distance
  _geom_bond_site_symmetry_2
  _geom_bond_publ_flag
 Cu01 Cu01 2.628(3) 3_556 ?
 Cu01 O002 1.954(7) . ?
 Cu01 O003 1.987(7) 3_556 ?
 Cu01 O004 1.979(7) 2_546 ?
 Cu01 O005 1.968(7) 4_565 ?
 Cu01 N006 2.168(8) 2_646 ?
 O002 C00A 1.259(12) . ?
 O003 Cu01 1.987(7) 3_556 ?
 O003 C00A 1.259(11) . ?
 O004 Cu01 1.979(7) 2_556 ?
 O004 C008 1.260(12) . ?
 O005 Cu01 1.968(7) 4_566 ?
 O005 C008 1.260(12) . ?
 N006 Cu01 2.168(8) 2_656 ?
 N006 C00G 1.341(12) . ?
 N006 C00I 1.333(14) . ?
 F007 C00K 1.352(14) . ?
 C008 C00D 1.491(13) . ?
 C009 H009 0.9300 . ?
 C009 C00B 1.392(13) . ?
 C009 C00D 1.389(13) . ?
 C00A C00C 1.500(13) . ?
 C00B C00E 1.492(13) . ?
 C00B C00F 1.378(13) . ?
 C00C C00F 1.402(13) . ?
 C00C C00H 1.377(14) . ?
 C00D C00H 1.385(13) . ?
 C00E C00G 1.377(14) . ?
 C00E C00J 1.383(15) . ?
 C00F H00F 0.9300 . ?
 C00G H00G 0.9300 . ?
 C00H H00H 0.9300 . ?
 C00I H00I 0.9300 . ?
 C00I C00K 1.354(17) . ?
 C00J H00J 0.9300 . ?
 C00J C00K 1.372(15) . ?
 C00L H00A 0.9600 . ?
 C00L H00B 0.9600 . ?
 C00L H00C 0.9600 . ?
 C00L C1 1.42(5) . ?
 C00M H00D 0.9600 . ?
 C00M H00E 0.9600 . ?
 C00M H00K 0.9600 . ?
 C00M C1 1.41(4) . ?
 C1 H1A 0.9700 . ?
 C1 H1B 0.9700 . ?

loop_
  _geom_angle_atom_site_label_1
  _geom_angle_atom_site_label_2
  _geom_angle_atom_site_label_3
  _geom_angle
  _geom_angle_site_symmetry_1
  _geom_angle_site_symmetry_3
  _geom_angle_publ_flag
 O002 Cu01 Cu01 87.5(2) . 3_556 ?
 O002 Cu01 O003 168.5(3) . 3_556 ?
 O002 Cu01 O004 88.5(3) . 2_546 ?
 O002 Cu01 O005 87.3(3) . 4_565 ?
 O002 Cu01 N006 97.9(3) . 2_646 ?
 O003 Cu01 Cu01 81.1(2) 3_556 3_556 ?
 O003 Cu01 N006 93.6(3) 3_556 2_646 ?
 O004 Cu01 Cu01 81.1(2) 2_546 3_556 ?
 O004 Cu01 O003 91.8(3) 2_546 3_556 ?
 O004 Cu01 N006 92.4(3) 2_546 2_646 ?
 O005 Cu01 Cu01 87.6(2) 4_565 3_556 ?
 O005 Cu01 O003 90.1(3) 4_565 3_556 ?
 O005 Cu01 O004 168.1(3) 4_565 2_546 ?
 O005 Cu01 N006 99.2(3) 4_565 2_646 ?
 N006 Cu01 Cu01 171.5(2) 2_646 3_556 ?
 C00A O002 Cu01 120.0(6) . . ?
 C00A O003 Cu01 125.8(7) . 3_556 ?
 C008 O004 Cu01 126.3(7) . 2_556 ?
 C008 O005 Cu01 119.1(6) . 4_566 ?
 C00G N006 Cu01 121.6(7) . 2_656 ?
 C00I N006 Cu01 119.5(6) . 2_656 ?
 C00I N006 C00G 118.2(9) . . ?
 O004 C008 O005 125.6(9) . . ?
 O004 C008 C00D 117.2(9) . . ?
 O005 C008 C00D 117.1(9) . . ?
 C00B C009 H009 119.8 . . ?
 C00D C009 H009 119.8 . . ?
 C00D C009 C00B 120.4(9) . . ?
 O002 C00A C00C 117.2(8) . . ?
 O003 C00A O002 125.4(9) . . ?
 O003 C00A C00C 117.3(9) . . ?
 C009 C00B C00E 120.9(9) . . ?
 C00F C00B C009 119.6(9) . . ?
 C00F C00B C00E 119.5(9) . . ?
 C00F C00C C00A 119.4(9) . . ?
 C00H C00C C00A 121.0(8) . . ?
 C00H C00C C00F 119.5(9) . . ?
 C009 C00D C008 120.2(9) . . ?
 C00H C00D C008 120.3(8) . . ?
 C00H C00D C009 119.5(9) . . ?
 C00G C00E C00B 121.2(9) . . ?
 C00G C00E C00J 117.5(9) . . ?
 C00J C00E C00B 121.3(9) . . ?
 C00B C00F C00C 120.2(10) . . ?
 C00B C00F H00F 119.9 . . ?
 C00C C00F H00F 119.9 . . ?
 N006 C00G C00E 123.5(9) . . ?
 N006 C00G H00G 118.3 . . ?
 C00E C00G H00G 118.3 . . ?
 C00C C00H C00D 120.6(9) . . ?
 C00C C00H H00H 119.7 . . ?
 C00D C00H H00H 119.7 . . ?
 N006 C00I H00I 119.3 . . ?
 N006 C00I C00K 121.3(9) . . ?
 C00K C00I H00I 119.3 . . ?
 C00E C00J H00J 120.8 . . ?
 C00K C00J C00E 118.3(10) . . ?
 C00K C00J H00J 120.8 . . ?
 F007 C00K C00I 118.9(10) . . ?
 F007 C00K C00J 119.9(11) . . ?
 C00I C00K C00J 121.2(11) . . ?
 H00A C00L H00B 109.5 . . ?
 H00A C00L H00C 109.5 . . ?
 H00B C00L H00C 109.5 . . ?
 C1 C00L H00A 109.5 . . ?
 C1 C00L H00B 109.5 . . ?
 C1 C00L H00C 109.5 . . ?
 H00D C00M H00E 109.5 . . ?
 H00D C00M H00K 109.5 . . ?
 H00E C00M H00K 109.5 . . ?
 C1 C00M H00D 109.5 . . ?
 C1 C00M H00E 109.5 . . ?
 C1 C00M H00K 109.5 . . ?
 C00L C1 H1A 112.6 . . ?
 C00L C1 H1B 112.6 . . ?
 C00M C1 C00L 96(4) . . ?
 C00M C1 H1A 112.6 . . ?
 C00M C1 H1B 112.6 . . ?
 H1A C1 H1B 110.1 . . ?

loop_
  _geom_torsion_atom_site_label_1
  _geom_torsion_atom_site_label_2
  _geom_torsion_atom_site_label_3
  _geom_torsion_atom_site_label_4
  _geom_torsion
  _geom_torsion_site_symmetry_1
  _geom_torsion_site_symmetry_2
  _geom_torsion_site_symmetry_3
  _geom_torsion_site_symmetry_4
  _geom_torsion_publ_flag
 Cu01 O002 C00A O003 -1.6(14) . . . . ?
 Cu01 O002 C00A C00C 179.0(7) . . . . ?
 Cu01 O003 C00A O002 -1.3(15) 3_556 . . . ?
 Cu01 O003 C00A C00C 178.1(7) 3_556 . . . ?
 Cu01 O004 C008 O005 -0.2(16) 2_556 . . . ?
 Cu01 O004 C008 C00D 179.8(7) 2_556 . . . ?
 Cu01 O005 C008 O004 -4.9(15) 4_566 . . . ?
 Cu01 O005 C008 C00D 175.2(7) 4_566 . . . ?
 Cu01 N006 C00G C00E 171.3(8) 2_656 . . . ?
 Cu01 N006 C00I C00K -171.2(11) 2_656 . . . ?
 O002 C00A C00C C00F 19.1(15) . . . . ?
 O002 C00A C00C C00H -162.9(10) . . . . ?
 O003 C00A C00C C00F -160.4(10) . . . . ?
 O003 C00A C00C C00H 17.6(15) . . . . ?
 O004 C008 C00D C009 -137.9(11) . . . . ?
 O004 C008 C00D C00H 40.3(15) . . . . ?
 O005 C008 C00D C009 42.0(15) . . . . ?
 O005 C008 C00D C00H -139.8(10) . . . . ?
 N006 C00I C00K F007 179.1(13) . . . . ?
 N006 C00I C00K C00J 0(2) . . . . ?
 C008 C00D C00H C00C -178.0(10) . . . . ?
 C009 C00B C00E C00G -47.8(15) . . . . ?
 C009 C00B C00E C00J 134.0(12) . . . . ?
 C009 C00B C00F C00C 1.1(16) . . . . ?
 C009 C00D C00H C00C 0.2(16) . . . . ?
 C00A C00C C00F C00B 174.3(10) . . . . ?
 C00A C00C C00H C00D -174.9(10) . . . . ?
 C00B C009 C00D C008 175.4(10) . . . . ?
 C00B C009 C00D C00H -2.9(16) . . . . ?
 C00B C00E C00G N006 -179.1(9) . . . . ?
 C00B C00E C00J C00K 178.8(12) . . . . ?
 C00D C009 C00B C00E 179.2(10) . . . . ?
 C00D C009 C00B C00F 2.2(16) . . . . ?
 C00E C00B C00F C00C -175.9(10) . . . . ?
 C00E C00J C00K F007 -179.2(13) . . . . ?
 C00E C00J C00K C00I 0(2) . . . . ?
 C00F C00B C00E C00G 129.1(11) . . . . ?
 C00F C00B C00E C00J -49.1(16) . . . . ?
 C00F C00C C00H C00D 3.1(16) . . . . ?
 C00G N006 C00I C00K -0.4(18) . . . . ?
 C00G C00E C00J C00K 0.5(18) . . . . ?
 C00H C00C C00F C00B -3.7(16) . . . . ?
 C00I N006 C00G C00E 0.7(16) . . . . ?
 C00J C00E C00G N006 -0.8(16) . . . . ?

loop_
  _refln_index_h
  _refln_index_k
  _refln_index_l
  _refln_F_squared_meas
  _refln_F_squared_sigma
 0 0 -2 9795.12 267.88
 0 0 2 9689 267.92
 0 0 3 -0.56 11.65
 0 0 -3 -4.86 10.71
 0 0 4 628.31 25.66
 0 0 -4 601.57 25.62
 0 0 -5 0.04 3.63
 0 0 5 -2.08 12.65
 0 0 -6 25.92 4.17
 0 0 6 29.9 12.35
 0 0 7 2.31 8.63
 0 0 7 0.24 9.91
 0 0 -7 1.04 3.63
 0 0 7 -1.29 8.46
 0 0 7 5.54 8.61
 0 0 7 2.73 6.45
 0 0 -7 -2.38 8.38
 0 0 7 -3.83 12.32
 0 0 7 1.66 6.47
 0 0 8 478.26 19.78
 0 0 8 481.47 18.06
 0 0 8 439.91 17.86
 0 0 8 428.39 18.24
 0 0 -8 405.03 20.71
 0 0 9 -11.03 14.71
 0 0 9 -2.37 12.09
 0 0 9 6.36 12.04
 0 0 9 -3.37 10.95
 0 0 10 146.16 15.52
 0 0 10 126.75 15.51
 0 0 10 168.18 20.64
 0 0 10 126.15 14.33
 0 0 11 -0.33 23.53
 0 0 11 -7.2 19.37
 0 0 11 -3.81 18.34
 0 0 11 -7 14.63
 0 0 12 16.04 28.39
 0 0 12 29.08 20.84
 0 0 12 34.28 20.09
 0 0 13 -19.63 27.85
 0 0 13 3.37 19.25
 0 0 14 51.83 14.13
 0 0 14 75.66 27.08
 0 0 14 73.6 19.82
 0 0 15 18.62 25.87
 0 0 15 6.76 17.96
 0 0 17 18.46 16.2
 0 -1 -1 3032.5 84.73
 0 1 1 3124.62 84.81
 0 1 1 3106.96 85.26
 0 -1 -2 2587.79 73.1
 0 1 2 2648.69 73.2
 0 -1 3 16.11 20.7
 0 -1 -3 14.2 7.59
 0 -1 -4 3633.81 106.69
 0 -1 4 4115.41 114
 0 -1 5 142.67 21.11
 0 -1 -5 124.46 9.07
 0 -1 -5 127.05 11
 0 -1 -6 865.82 31.1
 0 -1 6 838.93 37.57
 0 -1 -6 780.95 29.42
 0 -1 -6 829.67 28.96
 0 -1 -7 1344.58 36.7
 0 -1 -7 1156.05 39.97
 0 1 7 1218.29 35.93
 0 1 7 1179.2 36.87
 0 1 -7 1133.31 39.53
 0 -1 7 1153.4 47.46
 0 -1 7 1206.6 35.42
 0 -1 7 1300.35 36.24
 0 -1 -7 1231.04 39.26
 0 -1 7 1157.13 35.26
 0 1 7 1125.51 35.9
 0 1 7 1290.76 36.03
 0 -1 7 989.75 36.35
 0 1 8 -2.41 10.01
 0 -1 -8 5.37 8.59
 0 1 8 -0.29 12.74
 0 -1 8 1.14 7.69
 0 1 8 0.15 10.18
 0 1 -8 2.82 8.33
 0 -1 -8 -2.7 5.31
 0 -1 8 0.43 15.48
 0 -1 8 3.99 10.5
 0 1 8 1.14 9.65
 0 -1 8 -0.1 7.68
 0 -1 8 0.93 10.3
 0 -1 -8 1.67 7.18
 0 1 9 192.58 14.26
 0 -1 9 115.55 18.05
 0 -1 9 172.5 14.7
 0 1 9 173.02 13.6
 0 -1 9 183.95 12.05
 0 -1 9 124.78 12.82
 0 -1 9 185.97 16.94
 0 -1 9 181.9 14.32
 0 1 9 190.51 17.83
 0 1 9 195.18 13.49
 0 -1 10 82.26 14.78
 0 1 10 103.25 14.47
 0 -1 10 101.29 15.71
 0 -1 10 53.56 12.13
 0 1 10 107.21 21.61
 0 1 10 96.43 16.58
 0 -1 10 78.96 18.71
 0 1 10 86.01 13.57
 0 -1 11 40.82 20.18
 0 1 11 63.9 26.21
 0 1 11 29.71 15.73
 0 1 11 0.07 20.92
 0 1 11 49.92 17.97
 0 -1 11 14.17 14.27
 0 -1 12 31.72 27.54
 0 1 12 13.87 17.5
 0 1 12 26.99 29.32
 0 1 12 22.96 19.67
 0 -1 12 7.43 21.09
 0 1 13 47.49 18.55
 0 -1 13 59.06 28.03
 0 1 13 4.67 16.48
 0 -1 13 22.49 20.69
 0 -1 13 45.69 20.84
 0 1 13 23.64 28.02
 0 1 14 43.29 17.21
 0 -1 14 8.23 20.17
 0 -1 14 49.33 19.58
 0 1 14 28.07 27.11
 0 1 14 30.2 14.59
 0 -1 14 48.4 28.16
 0 1 15 5.05 24.93
 0 1 15 10.69 17.08
 0 -1 15 14.83 18.2
 0 -1 15 25.38 25.53
 0 -1 16 665.49 37.15
 0 1 17 0.33 13.54
 0 -1 17 3.22 16.47
 0 2 0 139.2 9.04
 0 -2 -1 2055.89 62.39
 0 -2 -1 2163.77 61.21
 0 -2 1 2204.55 61.24
 0 2 2 1467.95 40.02
 0 2 2 1512.24 40.53
 0 -2 -2 1450.46 40.13
 0 -2 -2 1479.54 40.63
 0 -2 -3 1155.07 34.88
 0 2 3 1185.28 35.66
 0 -2 -3 1229.85 34.12
 0 -2 -4 499.17 17.89
 0 -2 -4 473.26 18.22
 0 -2 -4 531.75 16.88
 0 -2 -4 497.72 18.39
 0 -2 -5 1116.13 32.55
 0 -2 -5 1027.76 34.16
 0 -2 5 1123.51 47.56
 0 -2 -5 1111.04 33.96
 0 -2 6 821.93 27.25
 0 -2 6 827.9 42.62
 0 -2 -6 935.71 29.75
 0 -2 6 861.61 26.1
 0 2 6 800.28 26.33
 0 -2 -6 832 30.16
 0 -2 -6 938.17 28.33
 0 -2 -6 805.66 29.88
 0 -2 7 921.61 28.11
 0 -2 7 907.46 28.84
 0 -2 -7 1053.66 30.98
 0 -2 -7 910.53 33.45
 0 -2 7 744.36 42.65
 0 -2 7 874.59 29.53
 0 2 7 922.3 30.64
 0 -2 -7 1085.76 31.21
 0 -2 -7 924.06 33.06
 0 2 -7 890.96 32.22
 0 2 7 897.38 28.54
 0 2 7 855.25 28.36
 0 -2 7 862.51 27.81
 0 -2 8 217.87 11.41
 0 2 -8 193.38 13.88
 0 2 8 242.6 17.21
 0 -2 -8 221.94 15.07
 0 -2 -8 217.7 13.81
 0 2 8 240.1 12.98
 0 -2 -8 243.92 12.38
 0 -2 -8 189.13 14.47
 0 2 8 202.73 12.3
 0 -2 8 224.55 11.64
 0 -2 8 225.84 13.33
 0 -2 -8 249.57 12.33
 0 -2 8 222.29 14.23
 0 2 9 484.73 19.28
 0 -2 9 449.63 17.79
 0 -2 9 477.71 20.39
 0 -2 9 428.35 19.41
 0 2 9 471.04 18.53
 0 2 9 481.77 23.61
 0 -2 9 459.28 17.47
 0 -2 10 8.76 12.7
 0 -2 10 8.06 14.99
 0 2 10 7.82 14.62
 0 -2 10 15.91 12.3
 0 2 10 17.19 13.4
 0 -2 10 7.33 11.86
 0 2 10 14.26 21.19
 0 -2 11 15.94 25.14
 0 2 11 -46.59 29.13
 0 2 11 85.33 17.55
 0 2 11 97.39 19.2
 0 -2 11 21.32 14.09
 0 -2 12 -11.98 16.06
 0 -2 12 247.33 22.71
 0 2 12 9.47 17.51
 0 2 12 21.87 29.19
 0 -2 12 196.35 29.89
 0 2 12 5.73 16.88
 0 -2 13 101.99 28.07
 0 -2 13 104.99 15.83
 0 2 13 81.04 28.79
 0 2 13 100.18 17.05
 0 2 13 53.29 17.66
 0 -2 13 77.12 19.89
 0 -2 14 -6.76 27.58
 0 -2 14 -0.08 19.97
 0 2 14 -8.47 26.28
 0 2 14 -6.72 15.51
 0 2 14 2.2 16.01
 0 -2 15 158.75 26.7
 0 2 15 99.62 24.02
 0 -2 16 -5.46 22.16
 0 -2 17 82.88 16.17
 0 3 0 -3.5 10.09
 0 -3 1 137.62 8.27
 0 3 1 183.43 11.32
 0 -3 2 496.62 16.71
 0 3 2 516.83 17.33
 0 -3 -2 502.38 16.77
 0 3 2 529.08 19.16
 0 -3 -2 553.61 18.37
 0 -3 3 79.63 6
 0 3 3 70.86 8.24
 0 -3 -3 65.1 6.61
 0 -3 -3 53.46 6.13
 0 -3 -4 48.24 8.32
 0 -3 -4 50.49 6.36
 0 -3 -4 55.97 6.93
 0 3 4 47.87 8.13
 0 -3 -5 374.43 15.58
 0 -3 5 365.96 12.86
 0 -3 -5 383.13 17
 0 3 5 345.67 13.39
 0 -3 5 374.32 12.97
 0 -3 -5 401 15.77
 0 -3 -6 638.23 24.37
 0 -3 -6 664.01 24.25
 0 -3 6 783.23 41.27
 0 -3 6 644.11 20.97
 0 -3 -6 822.31 25.28
 0 -3 -6 747.32 22.82
 0 -3 -6 657.13 24.87
 0 3 6 658.09 23.88
 0 -3 6 639.39 20.95
 0 3 -6 642.54 24.71
 0 -3 6 643.24 22.79
 0 3 6 606.86 21.43
 0 -3 7 245.78 28.78
 0 -3 -7 200.36 13.8
 0 -3 7 211.54 10.94
 0 -3 7 207.88 13.41
 0 -3 -7 228.14 11.32
 0 3 7 221.19 16
 0 -3 -7 204.77 13.54
 0 -3 -7 210.54 13.13
 0 3 -7 205.08 13.63
 0 3 7 206.14 12.32
 0 3 8 232 14.12
 0 3 8 226.02 18.02
 0 -3 8 199.86 14.84
 0 -3 8 212.22 14.2
 0 -3 -8 244.6 14.02
 0 3 -8 192.86 14.69
 0 -3 -8 180.35 14.13
 0 3 8 191.98 12.37
 0 -3 8 227.31 12.47
 0 3 9 53.82 11.1
 0 3 9 72.72 19.8
 0 -3 9 19.87 11.5
 0 -3 9 62.77 15.08
 0 -3 9 54.61 14.16
 0 -3 9 57.75 11.33
 0 3 9 68.19 13.36
 0 3 10 127.48 13.15
 0 -3 10 122.52 18.55
 0 -3 10 85.54 14.98
 0 -3 10 129.66 13.54
 0 -3 10 142.39 14.4
 0 3 10 156.41 17.35
 0 -3 10 137.09 17.85
 0 3 10 179.85 23.47
 0 3 11 76.45 15.54
 0 -3 11 132.41 27.87
 0 3 11 -2.33 20.76
 0 3 11 2.51 31.79
 0 -3 11 104.75 20.64
 0 -3 11 92.19 20.94
 0 -3 11 69.26 16.3
 0 -3 11 87.89 15.58
 0 3 12 343.78 32.31
 0 -3 12 249.22 23.31
 0 -3 12 243.14 23.44
 0 3 12 242.41 18.23
 0 -3 12 199.99 17.61
 0 3 12 393.64 23.45
 0 -3 12 288.84 29.51
 0 -3 13 16.38 21.42
 0 -3 13 18.96 25.62
 0 3 13 10.18 27.69
 0 -3 13 17.23 19.44
 0 3 13 28.99 15.15
 0 3 13 42 18.81
 0 3 14 213.38 27.05
 0 -3 14 162.08 20.12
 0 -3 14 175.86 22.19
 0 -3 14 203.01 28.04
 0 -3 15 -20.97 17.41
 0 -3 15 -6.65 25.02
 0 -3 15 8.08 18.01
 0 3 15 23.3 21.84
 0 -3 16 98.36 20.36
 0 -3 17 7.69 13.29
 0 -4 0 421.62 15.94
 0 4 0 421.24 18.52
 0 4 1 3.09 8.38
 0 -4 -1 7 6.47
 0 -4 1 5.64 5.92
 0 4 -1 6.41 9.94
 0 -4 -2 123.03 9.69
 0 -4 2 123.44 7.97
 0 -4 -3 14.88 4.49
 0 4 3 13.67 7.93
 0 -4 -3 14.46 5.97
 0 4 -3 18.03 6.75
 0 -4 3 16.86 5.21
 0 4 4 414.97 16.34
 0 -4 -4 576.55 20.66
 0 -4 -4 493.26 18.81
 0 4 4 572.04 21.45
 0 -4 4 587.13 17.55
 0 -4 -4 431.3 17.29
 0 4 -4 529.4 18.43
 0 -4 4 465.6 15.64
 0 -4 4 471.23 15.79
 0 -4 -5 244.45 13.42
 0 -4 -5 210.95 13.2
 0 -4 -5 175.84 10.34
 0 4 5 171.42 10.42
 0 4 5 200.34 13.59
 0 -4 5 205.91 12.08
 0 4 -5 200.91 11.98
 0 -4 5 194.14 9.41
 0 -4 -5 203.55 11.45
 0 -4 -6 72.27 8.97
 0 4 6 61.53 9.52
 0 -4 -6 72.32 10.55
 0 4 6 79.47 6.97
 0 -4 6 71.56 10.96
 0 4 -6 71.66 9.57
 0 4 6 74.21 13.37
 0 -4 6 66.74 7.89
 0 -4 -6 58.48 7.53
 0 -4 -6 81.41 8.98
 0 4 7 218.87 13.9
 0 4 -7 266.65 15.9
 0 -4 7 199.65 14.66
 0 -4 7 208.01 11.55
 0 -4 7 192.83 11.84
 0 4 7 213.52 17.48
 0 -4 -7 189.77 13.61
 0 -4 -7 276.49 15.43
 0 -4 -7 236.4 13.5
 0 -4 8 281.77 14.25
 0 -4 8 252.54 13.88
 0 4 8 280.01 20.72
 0 -4 8 258.08 16.65
 0 4 8 289.37 16.73
 0 -4 9 727.16 25.28
 0 4 9 742.06 31.21
 0 -4 9 664.06 27.4
 0 -4 9 684.3 26.81
 0 4 9 693.23 27.05
 0 4 10 208.14 25.65
 0 -4 10 184.25 18.06
 0 4 10 256.48 22.58
 0 -4 10 149.45 18.92
 0 -4 10 184.92 19.77
 0 -4 10 121.16 21.5
 0 -4 11 483.03 24.04
 0 4 11 599.78 28.27
 0 -4 11 649.88 29.73
 0 4 11 656.02 34.19
 0 -4 11 418.96 24.71
 0 -4 12 271.39 28.84
 0 -4 12 183.54 20.08
 0 -4 12 248.7 24.05
 0 -4 12 211.69 18.69
 0 4 12 224.61 27.65
 0 4 12 221.09 22.26
 0 -4 13 203.94 28.98
 0 4 13 199.14 26.06
 0 -4 13 189.31 22.53
 0 -4 13 161.87 19.32
 0 -4 14 3.76 16.94
 0 4 14 26.28 22.83
 0 -4 14 0.07 18.78
 0 -4 14 5.21 24.59
 0 -4 15 -6.96 17.68
 0 -4 15 40.48 24.08
 0 -4 16 7.67 16.79
 0 -4 17 20.55 10.41
 0 -5 0 -2.96 6.7
 0 5 0 -1.21 9.37
 0 -5 1 166.57 7.13
 0 -5 1 197.81 10.7
 0 5 1 195.56 13.33
 0 -5 -1 208.7 11.67
 0 -5 2 74.2 5.49
 0 5 2 95.64 9.02
 0 -5 -2 92 9.63
 0 -5 2 76.61 7.63
 0 5 2 96.14 11.57
 0 -5 3 227.25 9.89
 0 -5 3 284.18 12.39
 0 5 3 280.83 13.21
 0 -5 3 245.87 9.73
 0 5 3 284.3 15.12
 0 5 3 225.84 12.31
 0 5 4 229.07 13.93
 0 -5 4 309.16 13.08
 0 -5 4 230.8 10.31
 0 5 -4 248.57 11.3
 0 5 4 280.22 16.19
 0 -5 -4 280.81 15.63
 0 -5 4 222.71 10.26
 0 -5 -4 222.56 12.71
 0 5 5 530.36 21.53
 0 -5 -5 533.74 21.47
 0 -5 5 517.41 17.49
 0 -5 -5 548.47 22.7
 0 -5 5 510.64 17.47
 0 -5 6 115.39 12.51
 0 5 6 109.4 9.26
 0 -5 6 103.51 9.34
 0 5 6 103.95 14.59
 0 -5 7 529.02 23.24
 0 -5 7 459.48 20.29
 0 5 7 510.89 24.91
 0 5 8 103.2 18.61
 0 -5 8 92.76 11.97
 0 -5 8 88.88 15.14
 0 -5 8 95.15 12.54
 0 5 8 117.01 17.49
 0 -5 9 209.12 17
 0 5 9 236.46 24.19
 0 -5 9 244.61 21.31
 0 -5 9 217.12 18.49
 0 -5 9 243.31 19.23
 0 5 10 215.09 27.32
 0 -5 10 140.97 17.76
 0 -5 10 104.53 23.57
 0 -5 10 148.08 17.22
 0 -5 10 182.66 18.33
 0 -5 11 182.28 21.77
 0 -5 11 163.98 18.22
 0 -5 11 200.29 18.05
 0 -5 11 178.09 17.85
 0 -5 11 157.29 17.14
 0 -5 12 71.95 16.88
 0 5 12 82.98 23.97
 0 -5 12 64.87 16.56
 0 -5 12 68.75 21.71
 0 5 13 28.25 21.89
 0 -5 13 37.74 19.4
 0 -5 14 8.96 14.49
 0 -5 14 -4.38 22.67
 0 -5 14 -5.06 18.19
 0 -5 15 96.36 15.13
 0 -5 16 -7.64 13.16
 0 -6 0 1107.02 30.57
 0 -6 0 1427.6 37.58
 0 6 1 64.05 11.62
 0 6 1 93.01 9.23
 0 -6 -1 90.43 9.98
 0 -6 1 92.12 8.76
 0 -6 1 77.26 5.62
 0 -6 1 82.95 5.76
 0 -6 -1 79.49 5.51
 0 -6 2 960.71 28.8
 0 -6 2 1031.87 33.24
 0 6 2 1019.64 37.33
 0 -6 -2 1075.11 35.71
 0 -6 2 1005.11 28.56
 0 6 2 1074.02 34.24
 0 6 -3 23.52 11.83
 0 -6 3 32.11 7.91
 0 -6 3 23.48 6.29
 0 -6 3 19.11 6.21
 0 6 3 26.88 6.97
 0 -6 -3 19.58 8.61
 0 6 3 17.75 9.68
 0 -6 4 1368.52 40.99
 0 -6 4 1388.12 40.81
 0 -6 5 4.64 7.93
 0 -6 5 0.3 8.22
 0 6 5 5.38 11.49
 0 6 6 1088.97 36.55
 0 -6 6 1033.35 33.73
 0 -6 6 1045 33.75
 0 -6 7 8.34 13.13
 0 -6 7 5.76 11.17
 0 6 7 10.29 15.37
 0 6 7 8.68 10.1
 0 -6 8 88.74 14.82
 0 -6 8 67.64 12.9
 0 6 8 92.55 20.72
 0 -6 9 14.19 16.31
 0 6 9 7.57 23.37
 0 -6 9 54.21 14.9
 0 -6 10 134.55 21.44
 0 -6 10 94.72 14.81
 0 -6 10 110.71 17.24
 0 -6 10 110.29 15.12
 0 -6 10 114.89 17.33
 0 6 10 59.99 23.16
 0 -6 11 11.22 15.99
 0 6 11 15.81 21.92
 0 -6 11 19.41 13.83
 0 -6 11 18.63 15.36
 0 -6 11 25.11 20.15
 0 -6 12 36.28 13.77
 0 6 12 52.8 19.8
 0 -6 12 43.41 20.43
 0 -6 12 54.72 15.84
 0 -6 13 10.05 16.67
 0 -6 14 2.54 15.01
 0 -6 15 17.45 10.91
 0 -6 16 4.66 8.55
 0 -7 0 2.91 5.58
 0 -7 -1 196.02 8.84
 0 -7 1 196.69 9.54
 0 7 1 211.29 14.24
 0 -7 2 134.83 8.84
 0 -7 2 139.45 8.9
 0 -7 3 385.22 15.18
 0 -7 3 394.86 15.13
 0 -7 4 17.46 8.66
 0 -7 4 19.53 8.54
 0 -7 5 468 18.28
 0 -7 5 471.44 18.5
 0 -7 6 87.8 11.44
 0 7 6 96.94 14.12
 0 -7 6 101.74 12.52
 0 -7 7 237.38 16.84
 0 -7 7 250.89 16.3
 0 7 7 281.37 17.1
 0 -7 8 -10.5 13.39
 0 -7 9 82.92 14.73
 0 -7 10 60.34 19.87
 0 -7 10 57.24 13.69
 0 -7 10 13.81 14.21
 0 -7 11 51.42 19.03
 0 -7 11 52.15 15.49
 0 -7 12 83.49 14.53
 0 -7 12 78.62 18.44
 0 -7 12 74.57 21.85
 0 -7 13 31.69 19.1
 0 -7 13 -6.89 14.18
 0 -7 14 41.53 11.5
 0 -7 15 -4.62 7.04
 0 -8 0 1.1 7.37
 0 -8 1 20.43 8.13
 0 -8 -1 16.16 6.83
 0 -8 -2 124.59 8.51
 0 -8 2 143.12 10.49
 0 -8 3 185.02 11.91
 0 -8 3 163.92 10.98
 0 -8 -3 171.71 9.41
 0 -8 -4 45.3 6.64
 0 -8 4 43.43 11.02
 0 -8 4 41.93 10.07
 0 8 5 180.51 18.72
 0 -8 5 204.53 13.59
 0 -8 5 224.39 14.82
 0 -8 6 82.49 14.58
 0 8 6 73.9 15.18
 0 -8 6 77.97 11.96
 0 -8 7 -1.96 10.66
 0 -8 7 5.39 13.73
 0 8 7 -6 13.45
 0 -8 8 24.19 14.68
 0 -8 8 21.01 12.21
 0 -8 9 147.24 14.05
 0 -8 9 149.48 16.68
 0 -8 10 3.34 17.37
 0 -8 11 157.34 17.41
 0 -8 12 5 14.16
 0 -8 12 23.42 16.65
 0 -8 12 11.9 11.98
 0 -8 13 145.13 12.02
 0 -8 13 163.01 15.02
 0 -8 14 5.7 9.09
 0 -8 14 5.01 7.09
 0 -9 0 -5.34 8.89
 0 -9 -1 159.34 10.55
 0 -9 1 154.03 11.33
 0 -9 -2 29.34 7.9
 0 -9 2 32.35 10.48
 0 -9 3 15.78 9.9
 0 -9 -3 0.72 6.84
 0 -9 4 12.76 9.1
 0 -9 4 11.24 10.36
 0 -9 5 76.88 12.63
 0 -9 5 72.02 10.19
 0 -9 6 49.24 10.3
 0 9 6 33.01 14.33
 0 -9 6 53.27 12.7
 0 -9 7 31.24 12.97
 0 -9 7 38.78 10.76
 0 9 7 37.82 12.7
 0 -9 8 0.05 13.66
 0 -9 8 12.96 10.87
 0 -9 9 21.47 13.31
 0 -9 9 2.84 15.26
 0 -9 10 74.36 13.36
 0 -9 10 104.53 16.75
 0 -9 11 39.09 13.39
 0 -9 11 117.31 16.46
 0 -9 12 112.19 13.06
 0 -9 12 81.24 10.82
 0 -9 13 -0.46 6.26
 0 -9 13 0.08 7.87
 0 -10 0 3.33 8.32
 0 -10 1 -0.05 8.78
 0 -10 -1 -4.75 8.01
 0 -10 -2 -2.64 7.65
 0 -10 2 17.23 9.68
 0 -10 3 0.57 10.17
 0 -10 4 2.74 10.66
 0 10 4 -18.32 14.26
 0 10 5 58.11 12.99
 0 -10 5 50.57 11.96
 0 10 6 31.07 12.62
 0 -10 6 215.19 13.63
 0 -10 7 84.31 13.01
 0 -10 8 49.51 11.51
 0 -10 9 29.64 12.74
 0 -10 9 26.21 10.88
 0 -10 10 -2.27 9.8
 0 -10 10 4.65 8.57
 0 -10 11 67.31 9.94
 0 -10 11 80.22 8.5
 0 -11 0 -7.05 7.73
 0 -11 1 71.54 9.13
 0 -11 2 8.47 8.99
 0 11 2 6.36 16.88
 0 -11 3 70.85 10
 0 11 3 28.02 15.72
 0 11 4 15.58 13.12
 0 -11 4 19.8 9.76
 0 -11 5 222.26 12.01
 0 11 5 51.19 11.92
 0 -11 6 120.57 11.97
 0 11 6 -9.6 9.98
 0 -11 7 73.77 10.36
 0 -11 8 2.84 7.73
 0 -11 9 27.62 8.05
 0 -11 9 8.84 8.15
 0 -11 9 21.75 6.7
 0 -11 10 1.19 5.09
 0 12 0 123.15 16.14
 0 12 2 88.18 14.23
 0 -12 3 25.32 7.4
 0 12 3 26.39 12.58
 0 -12 4 41.88 6.96
 0 12 4 25.08 10.19
 0 -12 5 7.57 6.13
 0 -12 6 37.14 5.59
 0 12 -6 38.05 6.6
 0 13 0 1.26 7.59
 0 13 1 53.76 8.08
 0 13 2 0.53 6.64
 0 13 -3 -1.31 5.36
 -1 0 16 90.24 17.79
 -1 0 16 5.29 19.83
 -1 0 15 3.03 20.26
 -1 0 15 -38.26 24.11
 -1 0 14 249.96 22.82
 -1 0 14 232.07 28.27
 -1 0 13 -36.01 20.3
 -1 0 13 259.28 30.35
 -1 0 12 213.12 16.67
 -1 0 12 117.67 27.18
 -1 0 12 242.98 23.15
 -1 0 12 135.56 20.58
 -1 0 11 0.1 12.23
 -1 0 11 -2.82 17.7
 -1 0 11 -4.33 20.65
 -1 0 11 -10.7 16.12
 -1 0 10 572.27 24.12
 -1 0 10 585.97 22.14
 -1 0 10 627.4 24.5
 -1 0 10 658.46 27.17
 -1 0 9 0.05 11.38
 -1 0 9 5.2 8.61
 1 0 -9 -0.4 7.53
 -1 0 9 -1.55 13.76
 -1 0 9 -1.46 8.97
 -1 0 9 0.49 11.4
 -1 0 8 4022.86 107.72
 -1 0 8 3857.9 107.13
 -1 0 8 3633.86 107.75
 -1 0 8 4003.83 108.67
 -1 0 8 3885.26 107.12
 -1 0 8 3610.76 107
 -1 0 7 2.37 8.1
 1 0 -7 -3.27 13.8
 -1 0 7 -4.37 13.57
 -1 0 6 1446.97 47.68
 1 0 -6 1345.83 47.79
 -1 0 5 2.5 11.94
 1 0 -5 -1.45 11.55
 1 0 -5 0.06 5.24
 1 0 -4 9623.7 263.81
 -1 0 4 9999 267.26
 1 0 -4 9224.89 267.39
 -1 0 3 1.6 3.53
 -1 0 2 3718.69 102.92
 1 0 -1 1.25 3.76
 1 0 -1 0.96 1.94
 1 0 0 5680.91 155.28
 -1 0 -1 0.82 3.18
 1 0 2 3785.2 101.57
 -1 0 -2 3449.3 98.13
 -1 0 -3 -1.77 6.89
 1 0 3 -9.62 14.22
 -1 0 -4 -1.96 8.93
 -1 0 -4 1.51 6.51
 1 0 4 5.97 12.02
 -1 0 -5 -1.63 8.72
 1 0 5 -8.19 11.54
 -1 0 -5 -0.42 7.36
 1 0 6 272.26 12.81
 -1 0 -6 354.86 15.48
 1 0 6 383.97 20.14
 -1 0 -6 291.7 16.16
 1 0 6 305.33 14.29
 1 0 6 341.97 14.19
 1 0 7 -4.03 9.56
 -1 0 -7 4.38 7.3
 1 0 7 -3.53 10.84
 1 0 7 -0.49 9
 1 0 7 7.85 11.09
 -1 0 -7 -0.33 8.39
 -1 0 -7 1.32 4.06
 1 0 8 46.88 10.4
 1 0 8 48.62 10.95
 -1 0 -8 42.41 8.45
 -1 0 -8 37.23 9.9
 1 0 8 56.99 13.64
 1 0 8 53.7 11.17
 1 0 8 45.49 11.39
 1 0 9 -0.92 12.43
 1 0 9 -2.13 15.92
 1 0 9 11.2 12.78
 1 0 9 -4.56 11.76
 1 0 10 -1.85 16.96
 1 0 10 7.26 15.18
 1 0 10 -10.56 13.97
 1 0 10 5.24 21.09
 1 0 11 -15.01 22.55
 1 0 11 -16.25 26.85
 1 0 12 -33.47 23.77
 1 0 12 -57.26 29.37
 1 0 13 -21.32 15.49
 1 0 13 0.84 18.32
 1 0 13 -28.74 28.43
 1 0 14 202.66 20.6
 1 0 14 134.93 28.47
 1 0 15 -12.91 12.65
 1 0 15 -10.56 26.12
 1 0 16 29.16 21.43
 1 0 17 4.08 12.92
 -1 -1 17 38.07 14.63
 -1 -1 17 86.8 22.17
 -1 -1 16 74.34 17.09
 -1 -1 16 48.15 22.74
 -1 1 16 88.12 17.32
 -1 1 15 49.35 23.21
 -1 -1 15 82.18 20.66
 -1 -1 14 49.26 25.81
 -1 1 14 59.44 20.11
 -1 -1 14 0.5 15.87
 -1 -1 14 60.78 21.4
 -1 -1 13 9.43 27.03
 -1 1 13 40.66 20.71
 -1 -1 13 128.68 22.26
 -1 1 13 111.14 15.35
 -1 1 13 161.02 28.39
 -1 -1 12 5.01 21.29
 -1 -1 12 11.25 26.49
 -1 1 12 0.22 14.75
 -1 1 12 -16.4 20.65
 -1 -1 12 -24.87 18.74
 -1 1 11 314.47 17.44
 -1 -1 11 344.27 24.91
 -1 -1 11 319.8 21.84
 -1 1 11 306.04 20.52
 -1 1 11 347.63 24.49
 -1 1 11 317.08 21.19
 -1 -1 10 2.7 17.14
 -1 -1 10 0.22 14.94
 -1 1 10 -2.2 11.39
 -1 -1 10 3.04 12.8
 -1 1 10 2.37 14.11
 -1 -1 10 0.38 10.14
 -1 -1 10 5.6 10.76
 -1 1 10 3.28 17.76
 -1 -1 10 -3.59 11.78
 -1 1 10 6.12 13.77
 -1 1 9 1434.73 43.04
 -1 -1 9 1290.44 41.6
 1 -1 -9 1213.29 46.48
 -1 1 9 1494.47 42.15
 -1 -1 9 1455.88 42.24
 -1 -1 9 1483.57 42.05
 -1 -1 9 1285.43 43.07
 -1 -1 9 1321.37 43.09
 -1 -1 9 1219.55 54.43
 -1 1 9 1505.11 43.18
 -1 1 9 1540.07 44.78
 1 -1 -8 306.7 16.31
 -1 -1 8 316.8 12.91
 -1 1 8 285.03 14.22
 -1 1 8 319.35 16.21
 1 -1 -8 344.81 14.37
 -1 1 8 294.66 12.99
 -1 1 8 325.63 14.38
 -1 -1 8 296.04 13.01
 -1 -1 8 299.9 14.54
 -1 -1 8 295.8 23.6
 1 -1 -8 293.47 20.44
 -1 1 7 7.59 8.44
 1 -1 -7 11.96 7.22
 -1 1 7 11.46 7.81
 -1 -1 7 5.01 8.19
 1 -1 -7 5.06 7.41
 -1 -1 7 10.62 16.59
 -1 -1 7 8.97 6.46
 1 -1 -7 12.46 11.77
 1 -1 -6 4.03 5.81
 1 -1 -6 4.01 9.52
 1 -1 -6 0.21 5.78
 -1 -1 6 3.83 15.32
 -1 -1 5 939.45 36.15
 1 -1 -5 843.91 30.3
 1 -1 -5 912.01 28.34
 1 -1 -5 854.44 27.15
 1 -1 -4 1082.23 35.79
 1 -1 -4 1127.98 33.17
 1 -1 -3 89.06 6.97
 1 -1 -3 112.03 9.57
 1 -1 -3 115.47 6.85
 1 -1 -2 1701.15 47.88
 -1 1 2 1657.25 47.57
 1 -1 -2 1689.48 47.12
 1 -1 -1 6738.29 184.27
 -1 -1 1 6795.7 186.81
 1 -1 0 15.99 5.52
 -1 -1 0 13.33 7.07
 -1 -1 0 8.77 4.55
 -1 1 0 16.79 5.96
 1 -1 1 4139.51 118.83
 1 1 1 4091.86 119.88
 -1 1 -1 4636.75 118.65
 -1 -1 -1 4067.65 118.42
 -1 -1 -1 4128.29 119.24
 -1 1 -1 4609.76 119.23
 1 1 2 665.19 21.2
 -1 -1 -2 592.19 20
 -1 1 -2 635.02 19.85
 -1 -1 -2 511.04 17.53
 -1 -1 -2 510.93 18.15
 -1 -1 -3 2124.08 61.02
 -1 -1 -3 2085.35 60.24
 -1 -1 -3 2032.67 61.54
 -1 1 -3 2167.52 61.83
 -1 -1 -4 514.23 17.9
 -1 -1 -4 523.7 19.8
 -1 1 -4 518.67 20.29
 -1 -1 -5 785.95 27.42
 -1 1 -5 820.32 28.01
 -1 -1 -5 773.42 25.73
 1 -1 6 1772.56 38.87
 -1 1 -6 1265.7 37.12
 1 -1 6 1699.52 40.62
 1 1 6 1737.55 39.54
 1 -1 6 1371.52 50.23
 1 1 6 1890.58 39.78
 -1 -1 -6 1891.9 45.62
 -1 -1 -6 1958.11 43.53
 1 -1 6 1691.28 38.84
 -1 1 -6 2046.36 46.67
 1 1 6 1813.83 40.67
 1 1 7 413.31 16.13
 -1 -1 -7 419.66 17.75
 1 1 7 435.8 16.54
 1 -1 7 315.94 16.97
 -1 1 -7 395.18 19.08
 1 1 7 398.88 17.84
 -1 -1 -7 412.24 19.4
 1 -1 7 309.3 22.97
 1 1 7 377.79 15.48
 1 -1 7 391.33 14.92
 -1 1 -8 117.99 12.45
 1 1 8 117.98 11.37
 1 -1 8 100.05 15.85
 -1 -1 -8 107.7 12.04
 1 1 8 127.23 14.69
 -1 1 -8 106.86 10.81
 1 1 8 138.14 12.05
 1 1 8 129.91 12.71
 1 -1 8 79.04 12.33
 1 -1 8 107.59 11.93
 1 -1 8 119.37 13.64
 -1 -1 -8 101.47 10.34
 1 -1 9 90.3 13.76
 1 -1 9 87.41 14.19
 1 -1 9 98.92 17.47
 1 1 9 81.3 13.65
 1 -1 9 43.9 12.03
 1 1 9 86.12 14.83
 1 1 9 78.89 19.58
 1 1 9 90.73 12.84
 1 1 10 23.31 15.37
 1 -1 10 2.27 11.15
 1 1 10 21.33 14.38
 1 1 10 49.37 18.32
 1 -1 10 37.3 16.67
 1 1 10 33.08 22.52
 1 -1 10 54.62 22.33
 1 -1 10 45.37 17.33
 1 1 11 7.77 28.29
 1 -1 11 9.7 20.38
 1 -1 11 -12.15 22.05
 1 -1 11 -16.93 26.35
 1 1 12 4.9 29.3
 1 -1 12 43.36 18.88
 1 -1 12 59.65 28.96
 1 1 12 110.62 20.06
 1 -1 12 40.01 21.35
 1 -1 13 -10.45 15.04
 1 -1 13 -0.15 18.63
 1 -1 13 -21.89 21.55
 1 1 13 -0.11 27.92
 1 1 13 -6.94 15.45
 1 1 13 -19.44 16.78
 1 -1 13 -16.8 28.47
 1 -1 14 9.16 18.92
 1 1 14 6.88 30.99
 1 -1 14 15.87 13.8
 1 -1 14 7.44 27.03
 1 1 14 2.96 14.37
 1 1 15 3.36 13.24
 1 1 15 26.32 25.29
 1 -1 15 -22.6 24.9
 1 1 16 29.8 21.08
 1 -1 16 10.19 20.26
 1 1 17 -7.28 10.28
 1 -1 17 10.22 13.1
 -1 -2 17 100.56 13.87
 -1 -2 17 49.54 18.68
 -1 -2 16 198.03 18.9
 -1 -2 16 28.52 22.94
 -1 -2 15 71.89 26.72
 -1 2 15 83.48 18.22
 -1 2 15 84.68 22.75
 -1 2 14 -2.9 24.93
 -1 -2 14 0.08 15.59
 -1 -2 14 18.19 25
 -1 2 14 -16.02 17.14
 -1 2 13 -1.49 18.73
 -1 -2 13 -0.08 16.59
 -1 2 13 12.3 15.86
 -1 -2 13 18.82 26.44
 -1 -2 12 39.49 25.93
 -1 -2 12 0.07 16.36
 -1 2 12 29.38 19.03
 -1 2 12 57.46 17.87
 -1 2 11 103.53 15.26
 -1 2 11 122.66 17.49
 -1 -2 11 63.72 16.58
 -1 -2 11 95.21 14.9
 -1 2 11 102.48 24.29
 -1 -2 11 114.35 14.99
 -1 -2 10 87.54 16.16
 -1 2 10 108.05 19.48
 -1 -2 10 48.66 13.53
 -1 2 10 81.7 14.21
 -1 -2 10 100.58 12.49
 -1 -2 10 96.1 11.63
 -1 2 10 109.93 13.36
 -1 -2 9 334.82 14.71
 -1 -2 9 325.22 14.89
 -1 2 9 344.77 15.55
 -1 2 9 355.02 16.6
 -1 2 9 354.6 20.54
 -1 -2 9 316.7 17.31
 1 -2 -9 325.22 20.17
 -1 2 8 55.62 13.54
 -1 -2 8 53.81 20.05
 1 -2 -8 56.75 10.15
 -1 -2 8 63.78 8.88
 1 -2 -8 67.11 5.85
 -1 2 8 60.11 10.19
 -1 2 8 66.87 9.53
 1 -2 -8 57.94 8.55
 1 -2 -8 76.6 9.35
 -1 -2 8 38.9 10.09
 -1 -2 8 66.21 8.46
 -1 -2 8 60 11.27
 1 -2 -7 35.7 9.42
 1 -2 -7 51.69 7.96
 -1 -2 7 43.53 7.23
 -1 -2 7 38.67 9.54
 -1 -2 7 32.1 8.69
 -1 -2 7 45.85 18.64
 1 -2 -7 37.38 7.12
 -1 -2 7 40.34 6.8
 -1 2 7 44.31 7.66
 1 -2 -7 47.04 4.92
 -1 -2 6 36.8 19.85
 1 -2 -6 38.42 6.12
 -1 -2 6 34.27 5.65
 1 -2 -6 37.46 4.25
 1 -2 -6 37.39 9.02
 1 -2 -6 38.26 6.79
 1 -2 -5 95.69 5.18
 1 -2 -5 86.04 9.43
 1 -2 -5 86.75 6.84
 1 -2 -5 95.96 7.43
 1 -2 -4 78.14 9.05
 1 -2 -4 81.76 6.85
 1 -2 -4 82.91 4.56
 1 -2 -4 82.22 6.85
 1 -2 -3 300.99 12.22
 1 -2 -3 301.84 11.67
 -1 -2 3 328.94 26.19
 -1 2 2 5130.42 134.15
 -1 2 2 4913.66 134.86
 -1 2 1 118.1 6.43
 1 -2 -1 88.76 7.49
 1 -2 0 1479.24 44.93
 -1 2 0 1417.96 44.28
 1 2 1 460.61 19.29
 -1 2 -1 440.41 14.88
 -1 2 -1 496.66 17.5
 1 -2 1 540.85 17.34
 1 2 1 415.6 15.54
 -1 -2 -2 188.77 8.97
 -1 -2 -2 185.44 10.77
 -1 2 -2 169.1 8.13
 -1 -2 -3 1277.48 41.62
 -1 -2 -3 1404.56 40.83
 -1 2 -3 1405.55 42.28
 -1 -2 -3 1347.06 39.89
 -1 2 -3 1396.82 38.84
 -1 -2 -4 312.21 14.1
 -1 2 -4 362.07 15.23
 -1 -2 -4 340.91 12.81
 -1 -2 -4 334.17 13.24
 -1 -2 -5 2707.48 81.94
 -1 2 -5 2924.37 82.53
 -1 -2 -5 2719.34 80.69
 -1 -2 -5 2916.22 80.59
 1 -2 6 874.98 27.27
 -1 -2 -6 881.08 31.77
 1 2 6 890 29.55
 1 -2 6 924.17 27.4
 -1 2 -6 924.29 32.16
 1 -2 6 881.16 28.58
 1 2 6 926.01 27.97
 1 2 7 623.85 20.55
 1 -2 7 574.37 21.1
 -1 2 -7 619.53 24.77
 1 -2 7 597.08 19.56
 1 2 7 615.77 22.83
 -1 -2 -7 538.44 23.64
 1 2 7 560.27 20.1
 -1 -2 -7 660.58 22.82
 1 2 8 174.61 12.17
 -1 2 -8 173.71 13.88
 1 2 8 212.19 13.35
 1 2 8 204.25 17.3
 1 -2 8 192.01 14.16
 1 -2 8 183.55 10.86
 1 -2 8 45.8 10.45
 1 -2 8 7.35 16.6
 -1 -2 -8 196.4 12.08
 1 2 9 399.18 16.29
 1 -2 9 430.9 16.14
 1 -2 9 401.77 18.88
 1 2 9 459.43 18.89
 1 2 9 467.3 23.53
 1 2 10 24.44 24.68
 1 2 10 23.61 12.44
 1 -2 10 10.75 10.58
 1 2 10 28.47 16.68
 1 -2 10 24.69 18.37
 1 2 11 89.11 30.65
 1 -2 11 132.19 27.84
 1 2 11 70.68 20.5
 1 -2 11 91.45 22.29
 1 -2 12 3.55 27.08
 1 -2 12 9.23 22.7
 1 2 12 -7.4 29.12
 1 2 13 31.33 16.7
 1 2 13 28.72 16.15
 1 -2 13 47.38 14.81
 1 2 13 84.2 28.75
 1 -2 13 68.21 21.84
 1 -2 13 79.45 28.99
 1 -2 14 -1.81 27.12
 1 2 14 -11.57 16.54
 1 -2 14 -13.17 20.42
 1 -2 14 0.38 13.08
 1 -2 15 202.57 26.71
 1 2 15 237.2 25.52
 1 2 16 -25.72 18.37
 1 -2 16 24.88 18.85
 1 -2 17 54.89 12.07
 -1 -3 17 19.46 16.58
 -1 -3 16 226.87 26.49
 -1 -3 16 59.95 16.43
 -1 -3 15 -7.37 25.14
 -1 -3 15 4.96 17.77
 -1 -3 15 7.07 17.56
 -1 3 14 47.47 15.18
 -1 -3 14 33.53 19.28
 -1 3 14 36.17 23.54
 -1 -3 14 3.13 21.08
 -1 -3 14 47.47 25.8
 -1 -3 13 -13.92 21.33
 -1 -3 13 10.34 25.78
 -1 -3 13 -9.74 18.93
 -1 3 12 53.85 27.1
 -1 3 12 50.21 16.89
 -1 3 12 50.99 18.53
 -1 -3 12 52.19 16.61
 -1 -3 11 -26.7 17.72
 -1 -3 11 6.53 18.08
 -1 3 11 7.53 14.75
 -1 3 11 26.28 16.91
 -1 3 11 17.95 25.12
 -1 3 10 27.42 13.54
 -1 3 10 24.81 12.68
 -1 -3 10 26.25 17
 -1 -3 10 30.76 11.81
 -1 3 10 27.43 20.62
 -1 -3 10 10.96 12.99
 -1 -3 10 25.29 12.87
 -1 -3 9 83.49 11.42
 -1 -3 9 79.52 15.01
 -1 3 9 82.97 12.8
 -1 -3 9 88.07 11.17
 -1 3 9 95.87 17.65
 -1 3 9 87.32 12.28
 -1 -3 9 39.69 11.93
 1 -3 -8 3.46 8.24
 -1 -3 8 7.49 8.45
 -1 3 8 3.94 10.19
 1 -3 -8 8.91 7.68
 1 -3 -8 -0.44 5.69
 -1 -3 8 24.11 20.55
 -1 3 8 -1.72 9.36
 -1 -3 8 -0.78 11.93
 1 -3 -8 6.63 7.18
 -1 3 8 0.26 14.57
 -1 -3 8 8.38 8.21
 -1 3 7 -10.02 11.56
 -1 3 7 4.7 8.25
 1 -3 -7 2.13 7.96
 1 -3 -7 1.52 5.27
 -1 -3 7 -1.47 10.42
 -1 -3 7 9.71 20.2
 1 -3 -7 -0.29 5.92
 1 -3 -7 1.32 5.72
 -1 -3 7 0.32 6.71
 -1 -3 6 0.81 8.53
 -1 -3 6 1.41 5.53
 -1 3 6 4.67 7.19
 1 -3 -6 4.36 5.83
 1 -3 -6 3.34 7.53
 1 -3 -6 5.34 5.06
 1 -3 -5 4.74 5.17
 1 -3 -5 -1.87 4.87
 1 -3 -5 1.34 7.52
 1 -3 -4 556.71 19.6
 1 -3 -4 547.34 18.56
 -1 -3 4 493.26 15.72
 1 -3 -3 494.67 18.39
 -1 3 3 515.64 17.75
 1 -3 -3 482.16 16.71
 -1 3 2 209.83 8.68
 -1 3 2 203.29 10.4
 1 -3 -1 549.48 20.33
 1 3 -1 577.31 22.91
 1 3 0 13.18 9.58
 -1 3 0 4.01 8.99
 1 -3 0 5.34 6.66
 1 3 0 12.46 8.81
 1 -3 1 134.3 10.14
 1 3 1 148.78 10.64
 1 3 1 141.18 8.91
 1 3 1 148.03 10.76
 1 3 2 88.59 7.63
 -1 -3 -2 83.79 8.57
 -1 3 -2 104.93 9.69
 1 3 2 98.92 9.94
 1 -3 2 107.54 8.74
 1 3 3 2.01 7.58
 -1 -3 -3 2.71 5.94
 -1 3 -3 7.18 8.58
 -1 -3 -3 2.81 6.24
 -1 -3 -4 574.41 21.39
 1 3 4 604.05 22.34
 -1 -3 -4 583.18 19.97
 -1 3 -4 621.63 22.44
 -1 -3 -4 572.88 19.85
 -1 -3 -5 1629.89 45.81
 1 3 5 1472.49 44.64
 1 3 5 1436.35 43.06
 1 -3 5 1481.99 44.02
 -1 -3 -5 1404.16 46.52
 1 -3 5 1420.16 42.55
 -1 -3 -5 1532.02 46.76
 -1 -3 -5 1440.65 44.89
 -1 3 -5 1634.6 47.82
 1 -3 6 584.23 39.16
 -1 -3 -6 452.49 20.47
 -1 -3 -6 438.28 18.98
 -1 -3 -6 548.49 19.69
 -1 3 -6 530.61 21.88
 1 3 6 479.72 20.77
 -1 -3 -6 480.67 20.06
 1 -3 6 481.7 18.86
 1 -3 6 462.27 16.72
 1 3 6 493.22 17.76
 1 -3 7 149.07 27.24
 1 3 7 165.05 16.4
 1 -3 7 151.68 10.43
 -1 -3 -7 128.14 12.25
 1 3 7 140.44 9.71
 1 -3 7 164.54 13.34
 -1 3 -7 164.31 13.15
 -1 -3 -7 191.35 12.42
 1 -3 7 160.52 10.64
 -1 -3 -7 135.06 11.21
 -1 -3 -7 179.65 11.24
 1 3 7 163.93 12.17
 1 -3 8 1010.77 32.96
 -1 -3 -8 1076.87 36.9
 1 3 8 1126.45 34.74
 1 -3 8 1094.72 33.32
 1 3 8 963.5 32.87
 1 -3 8 1042.73 35.07
 1 3 8 1183.37 37.63
 1 -3 9 93.41 12.6
 1 3 9 112.21 15.89
 1 -3 9 91.69 16.24
 1 3 9 106.5 22.55
 1 3 9 89.9 11.09
 1 3 10 590.98 22.79
 1 -3 10 582.4 25.96
 1 3 10 773.33 35.95
 1 -3 10 632.13 24.73
 1 3 10 784.75 28.58
 1 3 11 11.79 14.95
 1 3 11 47.37 28.96
 1 -3 11 6.49 17.66
 1 -3 11 70.53 21.51
 1 3 11 5.09 21.43
 1 3 12 337.31 31.35
 1 -3 12 292.3 24.39
 1 -3 12 177.27 17.64
 1 -3 12 248.74 21.8
 1 3 12 195.95 21.11
 1 -3 13 -1.61 26.49
 1 3 13 2.66 27.97
 1 -3 13 -5.14 14.07
 1 -3 13 -13.79 19.79
 1 -3 13 16.3 21.24
 1 3 13 5.35 17.68
 1 -3 14 272.45 20.43
 1 3 14 272.63 27.71
 1 -3 14 250.33 28.34
 1 -3 14 239.62 21.91
 1 -3 15 -34.53 22.23
 1 -3 16 131.26 17.25
 1 3 16 7.52 13.77
 -1 -4 17 4.42 12.75
 -1 -4 16 2.79 14.37
 -1 -4 16 23.42 21.26
 -1 -4 15 14.95 17.5
 -1 -4 15 -0.08 22.31
 -1 -4 15 37.58 15.82
 -1 -4 14 55.35 27.58
 -1 -4 14 517.27 26.64
 -1 -4 13 45 19.95
 -1 -4 13 55.46 26.42
 -1 -4 13 44.79 19.49
 -1 4 13 53.12 22.54
 -1 -4 12 423.26 25.38
 -1 -4 12 461.48 23.5
 -1 -4 12 411.98 26.43
 -1 -4 12 437.89 22.87
 -1 4 12 498.17 30.08
 -1 -4 11 148.25 18.22
 -1 -4 11 127.89 20.9
 -1 -4 11 152.9 20.78
 -1 -4 11 185.27 19.91
 -1 4 10 148.94 20.88
 -1 -4 10 120.74 18.44
 -1 4 10 150.22 17.67
 -1 -4 10 81.76 19.48
 -1 -4 10 150.77 15.82
 -1 -4 9 84.62 15.63
 -1 -4 9 66.05 14.86
 -1 4 9 65.29 14.79
 -1 -4 9 80.13 12.13
 -1 4 9 86.58 18.42
 -1 -4 8 172.77 11.18
 -1 4 8 183.6 16.87
 -1 4 8 171.55 13.66
 1 -4 -8 120.44 11.12
 -1 -4 8 166.09 14.6
 1 4 -8 119.77 11.83
 -1 -4 7 4.39 8.3
 -1 4 7 42.7 8.04
 1 -4 -7 -3.34 6.5
 1 -4 -7 55.44 10.79
 -1 4 7 11.19 12.47
 1 -4 -7 35.16 9.5
 -1 -4 7 9.94 11.55
 -1 4 7 35.31 10.97
 -1 -4 7 1.73 7.51
 -1 -4 6 56.37 6.98
 1 -4 -6 55.08 8.07
 -1 -4 6 58.84 7.39
 -1 -4 6 57.84 10.21
 -1 4 6 54.78 10.11
 1 -4 -6 47.1 7.08
 -1 4 6 60.84 7.52
 1 -4 -6 55.12 9.31
 1 -4 -6 60.31 7.32
 1 -4 -5 50.76 6.59
 -1 4 5 46.87 7.12
 1 -4 -5 49.6 7.61
 -1 -4 5 37.81 3.58
 -1 -4 5 74.31 22.11
 -1 -4 5 52 6.4
 1 -4 -5 54.64 8.51
 -1 -4 5 45.66 6.29
 -1 -4 4 38.71 22.51
 1 -4 -4 46.13 6.23
 1 -4 -4 33.06 6.29
 -1 -4 4 41.95 4.75
 -1 4 4 46.02 8.36
 -1 -4 4 37.36 5.11
 1 -4 -4 50.95 8.35
 -1 4 3 448.28 16.72
 1 -4 -3 358.31 13.81
 1 -4 -3 390.34 15.06
 -1 4 3 450.29 14.89
 -1 4 2 1068.48 33.12
 1 -4 -2 1035.59 34.71
 1 4 -1 377.42 18.05
 -1 4 1 395.67 15.62
 -1 4 0 2059.24 69.12
 1 -4 0 2109.49 67.94
 1 4 1 466.44 19.24
 1 4 1 436.86 17.06
 1 -4 1 468.71 17.69
 1 4 2 1084.12 35.76
 1 4 2 1194.06 38.29
 1 -4 2 1178.12 36.3
 1 4 3 292.67 12.22
 1 4 3 352.09 16.14
 1 -4 3 308.42 11.13
 1 4 3 293.01 14.49
 -1 -4 -3 351.7 15.42
 1 -4 4 32.73 5.64
 1 -4 4 38.31 6.29
 -1 -4 -4 29.78 5.8
 -1 4 -4 45.5 9.6
 1 4 4 44.61 11.15
 -1 -4 -4 40.68 8.03
 -1 -4 -4 44.34 7.42
 1 4 4 43.01 9.43
 1 -4 5 757.58 24.3
 -1 -4 -5 696.33 25.76
 -1 -4 -5 666.16 23.89
 1 -4 5 688.32 21.74
 1 4 5 658.1 25.34
 -1 -4 -5 613.85 24.52
 1 -4 5 670.88 21.75
 -1 4 -5 788.44 27.02
 -1 4 -6 1.11 8.64
 1 -4 6 -2.44 7.53
 -1 -4 -6 -1.71 7.09
 1 -4 6 -3.99 24.35
 -1 -4 -6 3.09 7.05
 1 -4 6 4.76 11.21
 1 4 6 -5.64 14
 1 4 6 4.96 10
 1 -4 7 753.42 26.99
 1 -4 7 697.45 24.25
 1 4 7 787.69 29.59
 1 4 7 793.26 26.08
 1 -4 8 13.9 14.54
 1 4 8 3.56 14.23
 1 -4 8 8.82 10.63
 1 4 8 12.56 19.41
 1 -4 9 594.13 27.76
 1 -4 9 606.11 26.47
 1 4 9 728.15 32.71
 1 -4 9 614.12 24.26
 1 -4 9 574.59 24.98
 1 4 9 758.87 28.82
 1 -4 10 9.12 16.12
 1 4 10 20.67 21.02
 1 -4 10 12.84 18.14
 1 4 10 8.35 27.29
 1 4 11 538.71 35.35
 1 -4 11 471.17 25.55
 1 -4 11 546.56 28.19
 1 4 11 549.64 27.88
 1 4 12 -0.57 20.2
 1 4 12 12.76 27.06
 1 -4 12 7.66 17.68
 1 -4 12 15.81 14.63
 1 -4 12 -4.19 20.91
 1 4 13 121.02 21.55
 1 -4 13 148.7 15.13
 1 4 13 204.39 27.91
 1 -4 13 204.54 22.7
 1 4 14 39.7 22.92
 1 -4 14 27.07 17.62
 1 -4 15 0.05 15.93
 1 -4 15 6.21 20.16
 1 -4 16 4.85 12.96
 -1 -5 16 0.82 16.07
 -1 -5 15 76.08 15.28
 -1 -5 15 242.82 19.78
 -1 -5 14 -4.96 17.96
 -1 -5 14 -1.35 15.37
 -1 -5 14 -9.52 23.44
 -1 -5 13 174.69 18.36
 -1 -5 13 206.96 27.17
 -1 -5 13 180.01 18.12
 -1 -5 13 207.91 22.24
 -1 -5 12 29.39 15.14
 -1 -5 12 36.97 16.81
 -1 -5 12 35.91 19.49
 -1 -5 11 319.59 24.98
 -1 -5 11 345.78 22.05
 -1 -5 11 333.49 20.89
 -1 -5 10 311.32 20.73
 -1 5 10 373.17 25.52
 -1 -5 10 351.36 24.83
 -1 -5 10 373.89 20.37
 -1 5 9 399.13 23.18
 -1 -5 9 371.46 19.66
 -1 -5 9 390.53 18.97
 -1 -5 9 384.56 21.3
 -1 -5 8 5.92 11.52
 -1 -5 8 2.16 10.6
 -1 5 8 16.98 16.06
 -1 -5 8 3.32 14.02
 -1 -5 7 413.67 17.86
 -1 5 7 555.32 18.61
 -1 -5 7 510.78 21.16
 -1 -5 7 420.1 17.55
 1 -5 -6 -8.82 8.41
 -1 5 6 0.1 8.73
 -1 -5 6 0.26 7.88
 -1 -5 6 6.24 11.04
 -1 5 6 -4.1 10.76
 -1 -5 6 1.01 7.28
 1 -5 -6 0.43 5.51
 1 -5 -5 1263.14 39.41
 1 -5 -5 1370.27 42.71
 -1 5 5 1225.74 36.34
 -1 -5 5 1158 35.38
 1 -5 -5 1072.08 36.98
 -1 -5 4 316.78 12.18
 -1 -5 4 292.6 11.4
 1 -5 -3 482.56 19.56
 -1 5 3 511.07 17.04
 -1 -5 3 386.47 13.95
 -1 5 3 517.14 19.47
 -1 -5 3 458.59 16.31
 -1 -5 3 394.76 14.26
 -1 -5 2 27.63 4.73
 1 -5 -2 28.15 7.66
 1 5 -2 24.15 10.69
 -1 -5 2 34.24 6.61
 -1 -5 2 26.94 5.04
 -1 5 2 31.65 6.55
 -1 5 2 29.94 9.17
 1 5 -1 303.96 17.83
 -1 5 1 339.13 16.29
 1 -5 -1 324.51 15.63
 1 5 0 421.7 20.28
 1 -5 0 407.9 17.31
 1 -5 1 219.71 12.23
 1 5 1 217.1 13.99
 1 5 1 232.89 12
 1 -5 1 191.3 7.57
 1 5 2 72.12 8.33
 1 5 2 54.57 9.59
 1 -5 2 71.57 5.97
 1 5 2 69.48 11.52
 1 -5 2 82.47 9.54
 1 -5 3 293.98 11.32
 1 5 3 284.33 15.5
 1 -5 3 316.9 11.29
 1 -5 4 3.92 6.69
 1 -5 4 -0.37 6.22
 1 5 4 -0.39 9.2
 -1 -5 -4 -3.3 6.9
 1 5 4 -0.2 11.85
 1 -5 5 341.14 13.71
 1 5 5 342.85 19.21
 1 -5 5 334.38 13.81
 1 -5 6 18.87 12.07
 1 -5 6 15.97 8.86
 1 5 6 17.72 15.65
 1 -5 6 16.43 8.57
 1 -5 7 18.85 11.08
 1 5 7 29.42 18.46
 1 -5 7 30.57 13.5
 1 -5 7 18.25 9.84
 1 5 7 21.85 15.5
 1 -5 8 37.76 12.45
 1 5 8 36.41 18.66
 1 5 8 39.83 21.82
 1 -5 8 41.94 14.73
 1 -5 9 82.6 16.44
 1 -5 9 63.57 13.85
 1 5 9 89.16 22.61
 1 -5 10 134.89 17.63
 1 -5 10 162.83 17.74
 1 -5 10 183.43 20.88
 1 5 10 118.09 23.28
 1 -5 11 14.02 16.3
 1 -5 11 29.57 16.45
 1 -5 11 2.87 24.1
 1 5 11 -0.42 25.55
 1 -5 11 29.26 17.63
 1 -5 12 157.55 21.81
 1 -5 12 171.05 18.41
 1 -5 12 129.21 26.63
 1 5 12 209.54 27.2
 1 -5 12 149.49 15.05
 1 -5 13 10.35 18.3
 1 5 13 -28.32 24.69
 1 5 14 -0.24 19.33
 1 -5 15 19.55 12.05
 -1 -6 16 3.69 11.74
 -1 -6 15 8.34 12.46
 -1 -6 15 48.01 16.56
 -1 -6 14 70.13 12.46
 -1 -6 14 -19.16 16.82
 -1 -6 13 9.28 14.75
 -1 -6 13 28.77 19.26
 -1 -6 13 20.66 23.38
 -1 -6 13 6.34 13.12
 -1 -6 12 89.07 17.14
 -1 -6 12 120.62 20.44
 -1 -6 12 89.48 15.96
 -1 -6 12 94.12 15.29
 -1 -6 11 1.98 14.3
 -1 -6 11 4.35 15.56
 -1 -6 11 19.77 16.26
 -1 -6 11 5.51 19.94
 -1 -6 10 258.92 19.23
 -1 -6 10 287.68 19.72
 -1 -6 10 258.36 18.76
 -1 -6 10 287.52 22.08
 -1 -6 9 132.26 16.11
 -1 -6 9 144.38 16.6
 -1 -6 9 123.3 15.73
 -1 -6 8 1111.97 38.16
 -1 -6 8 1069.72 39.11
 -1 6 7 51.13 12.05
 -1 -6 7 41.59 11.06
 -1 6 6 2053.18 57.78
 -1 -6 6 1881.19 56.82
 -1 6 5 34.62 11.84
 -1 -6 5 24.97 7.94
 -1 -6 5 27.24 8.08
 -1 -6 4 1610.94 47.28
 -1 -6 4 1576.06 46.94
 -1 -6 3 118.57 8.98
 -1 6 3 129.41 11.72
 -1 -6 3 112.37 7.52
 -1 -6 3 110.43 7.33
 -1 6 3 132.49 9.34
 1 6 -3 131.86 15.39
 1 -6 -3 129.69 12.4
 1 -6 -2 556.88 23.83
 -1 -6 2 569.51 17.58
 -1 6 2 571.39 24.01
 -1 6 2 609.32 22.41
 -1 -6 2 608.23 21.64
 -1 -6 2 599.65 17.88
 1 6 -2 530.16 26.94
 -1 -6 1 94.87 6.4
 -1 -6 1 117.2 9.69
 1 -6 -1 97.16 5.72
 -1 6 1 102.9 11.25
 -1 -6 1 109.01 6.57
 1 6 -1 86.52 13.51
 1 -6 -1 113.3 10.95
 -1 -6 0 514.48 20.05
 -1 -6 0 444.65 14.39
 1 6 0 445.19 23.61
 1 6 0 496.09 20.03
 1 -6 0 496.92 20.81
 1 -6 0 416.7 14.31
 -1 -6 -1 -2.25 7.37
 1 6 1 0.15 9.82
 1 -6 1 0.21 5
 1 -6 1 0.11 7.93
 1 6 1 -0.76 7.27
 -1 6 -1 -1 7.38
 -1 -6 -1 1.54 4.16
 1 -6 2 239.44 10.08
 -1 -6 -2 275.98 15.46
 1 6 2 276.81 18.09
 1 6 2 271.23 14.64
 1 -6 2 289.79 15.15
 -1 -6 -2 241.51 8.81
 1 -6 3 54.6 7.02
 -1 6 -3 46.67 11.52
 1 -6 3 52.1 6.94
 1 -6 4 72.96 8.3
 1 -6 4 64.16 8.26
 1 6 4 72.63 13.06
 1 -6 5 0.96 8.48
 1 6 5 11.37 14.83
 1 -6 5 3.46 8.62
 1 6 6 58.93 9.44
 1 6 6 39.65 17.94
 1 -6 6 51.05 10.88
 1 -6 6 44.7 10.44
 1 6 7 -8.66 20.42
 1 -6 7 10.91 13.17
 1 -6 7 -4.24 12.52
 1 -6 7 1.11 11.6
 1 -6 8 4.22 13.62
 1 -6 8 4.73 13.36
 1 -6 8 -1.87 15.22
 1 -6 9 32.18 14.68
 1 -6 9 17.07 14.62
 1 -6 10 17.5 14.15
 1 6 10 6.19 24.06
 1 -6 10 24.64 16.56
 1 6 11 10.48 23.04
 1 -6 11 6.25 15.81
 1 -6 11 10.14 22.59
 1 -6 12 -11.15 12.22
 1 -6 12 2.9 22.25
 1 -6 13 -20.87 16.66
 1 6 13 13.11 18.4
 1 -6 13 44.07 21.09
 1 -6 14 12.44 12.3
 1 -6 14 7.33 16.44
 1 -6 15 -0.16 10.95
 1 -6 15 9.01 8.79
 -1 -7 15 50.91 8.61
 -1 -7 15 39.55 11.55
 -1 -7 14 32.86 13.25
 -1 -7 14 69.75 17.19
 -1 -7 13 -28.17 14.79
 -1 -7 13 60.53 15.46
 -1 -7 12 76.25 11.8
 -1 -7 12 78.48 18.28
 -1 -7 12 92.77 14.57
 -1 -7 11 33.02 10.92
 -1 -7 11 44.29 19.32
 -1 -7 11 18.46 15.85
 -1 -7 11 25.56 15.28
 -1 -7 10 110.66 19.74
 -1 -7 10 79.8 15.7
 -1 -7 10 105.43 16.87
 -1 -7 9 42.48 15.07
 -1 -7 9 59.64 15.51
 -1 7 8 11.81 13.81
 -1 -7 8 -21.66 15.37
 -1 7 7 1270.14 39.65
 -1 -7 7 1070.85 36.94
 -1 7 6 74.24 15.91
 -1 -7 6 60.52 11.49
 -1 -7 6 51.77 11.26
 -1 -7 5 738.43 25.49
 -1 7 5 755.16 29
 -1 -7 5 793.05 26.02
 -1 -7 4 104.94 9.57
 -1 -7 4 107.53 10.07
 -1 -7 3 454.12 16.34
 -1 -7 3 460.35 16.71
 -1 -7 2 159.6 9.22
 1 -7 -2 148.57 7.7
 -1 -7 2 168.94 9.41
 -1 -7 1 2.7 5.76
 1 -7 -1 1.44 5.28
 -1 -7 1 -3.09 6.01
 -1 -7 0 62.97 6.68
 1 -7 0 63.85 6.71
 -1 -7 0 62.53 6.6
 1 -7 1 154.49 9.11
 1 -7 2 235.1 12.11
 1 -7 3 309.96 13.04
 1 -7 3 308.1 13.38
 1 -7 4 146.19 10.66
 1 -7 4 132.69 10.82
 1 -7 5 167.54 11.94
 1 -7 5 161.83 12.32
 1 -7 6 77.4 11.19
 1 7 6 100.13 12.45
 1 -7 6 80.64 12.68
 1 -7 7 -6.81 15.38
 1 -7 7 20.87 11.6
 1 7 7 22.8 20.2
 1 -7 8 112.43 15.81
 1 -7 8 73.58 13.24
 1 7 9 107.51 21.01
 1 -7 9 71.18 15.6
 1 -7 10 59.53 15.02
 1 7 10 50.96 20.13
 1 -7 11 10.11 13.59
 1 -7 11 -2.55 20.06
 1 -7 12 -25.32 20.13
 1 -7 13 -0.04 12.7
 1 -7 13 -25.17 16.07
 1 -7 14 0.2 11.66
 1 -7 14 8.43 9.04
 -1 -8 14 48.87 8.73
 -1 -8 13 5.01 12.35
 -1 -8 12 498.15 20.07
 -1 -8 12 80.04 14.11
 -1 -8 11 127.44 14.1
 -1 -8 11 134.71 17.64
 -1 -8 11 131.87 15.16
 -1 -8 10 1.18 13.53
 -1 -8 10 0.05 17.21
 -1 -8 9 323.46 18.02
 -1 -8 8 54.58 12.76
 -1 8 8 59.69 14.03
 -1 -8 7 51.48 13.52
 -1 -8 7 59.53 14.48
 -1 -8 6 183.49 14.63
 -1 8 6 179.55 19.07
 -1 -8 5 141 12.04
 -1 -8 5 160.62 13.89
 -1 8 5 132.79 19.99
 -1 -8 4 181.43 13.49
 -1 -8 4 182.45 12.44
 -1 -8 3 577.14 20.43
 -1 -8 3 583.45 21.23
 -1 -8 2 50.75 8.83
 -1 -8 2 70.3 9.88
 -1 -8 1 665.54 21.66
 1 -8 -1 682.31 21.76
 -1 -8 1 645.86 22.21
 1 -8 0 6.52 7.71
 -1 -8 0 1.8 7.32
 -1 -8 -1 362.11 14.7
 1 -8 1 401.93 15.23
 -1 -8 -2 63.18 7.54
 1 -8 2 66.2 9.3
 -1 -8 -3 348.88 14.1
 1 -8 3 341.7 15.48
 1 -8 4 120.62 11.03
 1 -8 4 133.62 12.17
 1 -8 5 199.77 13.06
 1 -8 5 237.33 14.62
 1 8 5 219.77 17.31
 1 -8 6 -2.51 10.3
 1 -8 6 -17.76 12.88
 1 8 6 -2.32 12.69
 1 -8 7 31.76 10.8
 1 -8 7 38.18 13.79
 1 -8 8 6.63 14.24
 1 -8 9 327.93 18.89
 1 -8 10 27.65 13.33
 1 -8 10 39.02 12.98
 1 -8 11 104.83 18.49
 1 -8 11 245.9 15.8
 1 -8 12 -14.79 14.72
 1 -8 13 53.66 11.01
 1 -8 13 54.9 9.07
 -1 -9 13 10.1 7.27
 -1 -9 13 15.96 9.98
 -1 -9 12 6.53 9.36
 -1 -9 12 4.1 10.65
 -1 -9 12 14.77 13.97
 -1 -9 11 1.06 13.11
 -1 -9 10 0.04 11.04
 -1 -9 10 -8.92 14.37
 -1 -9 9 11.88 11.39
 -1 -9 8 55.87 14.36
 -1 -9 8 3.11 11.54
 -1 9 7 168.7 16.72
 -1 -9 7 189.95 13.78
 -1 -9 7 187.83 15.82
 -1 9 6 16.27 16.09
 -1 -9 6 11.15 12.55
 -1 -9 6 9.68 10.65
 -1 -9 5 67.01 11.55
 -1 -9 5 73.21 10.54
 -1 9 4 17.08 19.3
 -1 -9 4 4.31 11.55
 -1 -9 4 6.13 9.47
 -1 -9 3 13.35 9.31
 -1 -9 3 5.72 11.47
 -1 -9 2 10.1 8.69
 -1 -9 2 0.05 10.69
 1 -9 -1 -2.87 7.75
 -1 -9 1 2.41 9.35
 1 -9 0 5.56 8.25
 -1 -9 0 7.95 8.71
 -1 -9 -1 63.36 9.01
 1 -9 1 64.6 9.43
 1 -9 2 20.26 9.66
 -1 -9 -2 11.1 7.63
 1 -9 3 7.33 10.45
 -1 -9 -3 -0.04 7.13
 1 -9 4 207.35 13.65
 -1 -9 -4 205.83 10.87
 1 -9 5 7.74 11.5
 1 9 5 11.12 12.39
 -1 -9 -5 9.09 6.41
 1 9 6 22.38 11.84
 1 -9 6 15.31 9.02
 1 -9 6 25.24 12.83
 1 -9 7 -20.03 13.82
 1 -9 8 64.81 16.16
 1 -9 8 55.3 12.97
 1 -9 9 3.16 11.93
 1 -9 9 5.35 11.63
 1 -9 10 115.91 12.42
 1 -9 10 79.63 16.45
 1 -9 11 15.26 12.72
 1 -9 12 105.88 10.08
 -1 -10 12 5.66 7.7
 -1 -10 12 9.08 5.64
 -1 -10 11 108.1 9.74
 -1 -10 10 5.54 10.62
 -1 -10 10 -0.22 9.51
 -1 -10 9 1.55 12.81
 -1 -10 9 17.71 11.25
 -1 -10 8 11.31 8.99
 -1 -10 8 16.65 11.82
 -1 -10 7 22.34 9.59
 -1 10 7 -0.88 11.99
 -1 -10 7 21.84 12.21
 -1 10 6 12.28 13.97
 -1 -10 6 17.38 9.33
 -1 -10 5 11.01 9.08
 -1 10 4 4.1 17.04
 -1 -10 4 4.73 11.14
 -1 10 3 7.68 19.4
 -1 -10 3 19.27 10.78
 -1 -10 2 59.7 11
 -1 -10 1 106.94 11.42
 1 -10 0 74.5 8.92
 -1 -10 0 71.85 10.02
 1 -10 1 327.76 14.45
 -1 -10 -1 338.04 15.33
 -1 -10 -2 52.31 9.05
 1 -10 2 83.29 10.27
 1 -10 3 376.22 16.51
 -1 -10 -3 386.05 15.24
 1 10 4 -13.93 11.45
 1 -10 4 35.84 10.57
 1 10 5 22.18 11.93
 1 -10 5 51.36 11.93
 1 -10 6 27.71 11.1
 1 10 6 14.88 10.54
 1 -10 7 64.97 11.27
 1 -10 8 20.76 10.26
 1 -10 8 -22.69 12.4
 1 -10 9 40.41 12.49
 1 -10 9 47.51 9.84
 1 -10 9 55.31 11.47
 1 -10 10 5.16 9.7
 -1 -11 10 -5.91 7.32
 -1 -11 10 -3.18 6.14
 -1 -11 10 -0.07 5.37
 -1 -11 9 58.96 8.79
 -1 -11 9 66.97 7.96
 -1 -11 8 2.34 9.57
 -1 -11 8 -1.58 8.82
 -1 -11 7 66.31 11.09
 -1 -11 6 44.6 11.4
 -1 -11 5 58.96 10.52
 -1 11 5 17.36 13.46
 -1 11 4 -0.53 16.23
 -1 -11 4 -1.9 10.22
 -1 11 3 150.84 18.1
 -1 -11 3 219.5 12.85
 -1 11 2 22.17 18.12
 -1 -11 2 13.41 9.35
 -1 11 1 164.26 19.91
 -1 -11 1 162.68 11.37
 -1 -11 0 42.36 9.24
 -1 -11 -1 67.2 8.84
 1 11 2 10.91 15.33
 1 -11 2 18.03 8.64
 1 -11 3 -4.27 8.75
 1 11 3 -3.93 13.12
 1 -11 4 -0.9 8.57
 1 11 4 -1.18 11.69
 1 11 5 58.96 10.26
 1 -11 5 74.8 9.32
 1 -11 7 14.47 9.56
 1 -11 7 25.41 7.83
 -1 11 -7 0.39 5.94
 1 -11 8 6.85 6.58
 1 -11 8 9.15 8.21
 1 -11 9 1.31 6.48
 -1 -12 8 31.01 5.13
 -1 -12 7 2.96 5.39
 -1 -12 7 1.75 6.36
 -1 -12 6 80.88 7.35
 -1 -12 5 10.83 7.03
 -1 12 4 75.23 12.6
 -1 -12 4 79.69 8.5
 -1 12 3 -15.22 13.52
 -1 -12 3 4.54 7.38
 -1 12 2 138.77 17.75
 -1 -12 2 420.24 14.55
 -1 12 1 80.86 14.42
 1 12 0 83.53 14.87
 -1 12 -1 599.68 19.42
 1 12 1 16.72 14.24
 1 12 2 14.25 11.99
 -1 12 -2 18.68 12.03
 1 12 3 53.26 10.54
 -1 12 -3 -3.71 10.5
 1 12 4 3.87 8.3
 -1 12 -4 28.63 8.45
 -1 12 -5 0.34 6.13
 1 -12 6 7.02 6.83
 1 -12 7 5.36 5.09
 1 13 -2 5.74 6.4
 -1 13 2 -0.67 7.04
 1 13 -1 14.83 6.71
 -1 13 1 8.5 7.51
 1 13 0 15.24 6.98
 1 13 1 -0.87 6.03
 -1 13 -1 -3 6.74
 -1 13 -2 2.87 5.68
 -2 0 17 -31.86 16.48
 -2 0 16 146.72 20.36
 -2 0 16 63.98 18.72
 -2 0 15 -3.25 19.34
 -2 0 14 533.75 27.51
 -2 0 14 294.21 27.72
 -2 0 13 -6.02 24.63
 -2 0 13 99.14 23.8
 -2 0 12 1286.14 43.3
 -2 0 12 1263.42 43.95
 -2 0 11 4.92 14.21
 -2 0 11 -3.99 16.27
 -2 0 11 -3.81 18.63
 -2 0 10 2998.68 84.29
 -2 0 10 2919.33 85.1
 -2 0 10 3010.04 86.84
 -2 0 10 2895.27 85.47
 -2 0 9 -3.23 13.36
 -2 0 9 8.25 11.37
 -2 0 9 0.04 10.4
 -2 0 9 -0.73 8.12
 -2 0 8 2143.51 59.23
 -2 0 8 1938.12 60.13
 -2 0 8 2122.77 59.72
 2 0 -8 2083.13 70.16
 -2 0 7 2.83 8.15
 2 0 -7 -0.14 12.34
 -2 0 6 15.29 12.27
 2 0 -6 10.4 11.65
 -2 0 5 1.84 4.61
 -2 0 4 3986.31 111.55
 -2 0 3 5.05 9.83
 2 0 -3 16.82 10.84
 2 0 -2 1169.45 37.2
 2 0 -2 1267.76 35.14
 2 0 -1 -1.58 4.12
 -2 0 1 0.04 4
 -2 0 0 1893.06 50.7
 2 0 0 1727.36 50.28
 -2 0 -1 -4.72 5.28
 -2 0 -2 217.63 14.66
 -2 0 -2 197.59 9.03
 2 0 2 200.44 15.22
 -2 0 -3 4.4 9.48
 2 0 3 8.82 12.93
 -2 0 -3 -0.56 5.41
 -2 0 -4 36.54 6.36
 -2 0 -4 39.56 9.99
 2 0 4 42.23 11.89
 2 0 5 4.31 7.51
 2 0 5 -3.06 8.73
 -2 0 -5 0.42 6.16
 -2 0 -5 3.24 9.03
 2 0 5 1.66 8.87
 2 0 5 2.76 7.03
 2 0 5 3.52 10.24
 -2 0 -6 13.94 8.45
 2 0 6 7.98 8.22
 2 0 6 5.23 9.68
 2 0 6 8.04 10.14
 2 0 6 12.81 8.53
 -2 0 -6 12.78 6.54
 2 0 7 1.45 10.91
 2 0 7 1.21 7.56
 2 0 7 -6.32 9.68
 -2 0 -7 -1.87 8.76
 2 0 7 3.74 9.79
 -2 0 -7 0.63 6.36
 2 0 8 549.41 21.79
 2 0 8 522.09 22.43
 2 0 9 -1.8 12.73
 2 0 9 10.17 13.69
 2 0 10 175.72 28.82
 2 0 10 50.74 21.32
 2 0 11 -6.92 15.15
 2 0 11 325.4 32.64
 2 0 12 -5.26 13.99
 2 0 12 50.11 16.92
 2 0 12 12.95 28.43
 2 0 13 -2.43 14.03
 2 0 13 -8.74 27.09
 2 0 14 101.63 27.28
 2 0 14 29.04 14.93
 2 0 15 -22.73 23.16
 2 0 16 17.29 16.39
 -2 -1 17 132.65 17.67
 -2 1 17 62.73 16.59
 -2 -1 16 52.03 18.95
 -2 -1 16 -2.81 19.59
 -2 1 16 43.93 17.1
 -2 1 15 47.71 21.55
 -2 -1 15 20.3 20.44
 -2 1 15 155.67 21.26
 -2 -1 15 238.27 23.55
 -2 -1 14 -10.33 16.11
 -2 1 14 26.14 20.39
 -2 -1 14 -15.42 22.83
 -2 -1 14 18.04 20.31
 -2 1 14 8.29 23.4
 -2 1 13 284.08 27.65
 -2 -1 13 226.85 26.5
 -2 -1 13 251.9 26.65
 -2 1 12 30.51 20.44
 -2 -1 12 11.81 23.11
 -2 1 12 7.75 23.79
 -2 1 11 712.87 28.33
 -2 -1 11 734.37 27.56
 -2 1 11 696.49 30.55
 -2 -1 11 698.49 29.98
 -2 -1 11 691.69 24.59
 -2 1 10 430.14 21.96
 -2 -1 10 394.03 16.28
 -2 -1 10 382.46 19.93
 -2 -1 10 416.11 17.43
 -2 1 10 444.16 19.3
 -2 1 10 405.83 19.71
 -2 1 9 1037.16 32.06
 -2 -1 9 1071.41 45.1
 2 -1 -9 989.2 40.93
 -2 1 9 1047.22 33.28
 -2 1 9 1092.59 31.78
 -2 -1 9 1013.42 30.72
 -2 -1 9 1059.05 30.81
 -2 -1 8 935.51 39.77
 -2 1 8 848.54 28.31
 2 -1 -8 846.39 35.35
 -2 -1 8 936.17 27.38
 -2 -1 8 814.98 28.03
 -2 1 8 903.81 28.89
 2 -1 -8 787.02 31.09
 -2 -1 8 918.22 27.23
 -2 1 8 900.69 27.58
 -2 -1 7 83.92 15.87
 2 -1 -7 83.3 13.25
 -2 1 7 74.36 8.86
 -2 -1 7 87.47 7.05
 2 -1 -7 89.57 8.39
 -2 1 7 75.65 7.87
 2 -1 -6 315.31 17.26
 2 -1 -5 13.05 10.21
 -2 -1 5 10.54 4.88
 2 -1 -5 10.69 6.7
 2 1 -4 1027.58 35.87
 -2 1 4 905.17 29.46
 -2 -1 4 1003.08 34.73
 2 -1 -4 987.95 30.66
 2 1 -3 1345.37 45.27
 -2 1 3 1418.22 41.49
 -2 -1 3 1390.67 44.33
 -2 -1 2 1661.87 52.08
 2 1 -2 1734.9 53.06
 2 1 -1 2213.81 64.16
 -2 -1 1 2259.33 64.24
 2 1 -1 2147.76 64.62
 -2 -1 0 415.89 15.21
 -2 -1 0 403.46 14.35
 2 1 0 451.32 15.27
 2 1 0 403.05 14.62
 2 -1 0 452.15 17.67
 2 -1 1 134.62 11.66
 2 1 1 131.92 14.45
 -2 -1 -1 118.91 8.5
 2 1 1 132.02 8.12
 -2 1 -1 120.54 6.11
 -2 1 -2 343.92 18.33
 2 -1 2 371.01 16.95
 -2 -1 -2 307.61 13.4
 2 1 2 359.73 14.12
 2 1 2 402.89 19.61
 -2 -1 -2 324.75 16.87
 2 1 3 209.74 15.34
 -2 -1 -3 204.46 10.42
 -2 -1 -3 198.99 13.11
 -2 1 -3 218.92 13.64
 -2 -1 -4 620.26 20.62
 -2 1 -4 608.44 19.89
 -2 1 -4 653.99 23.52
 -2 -1 -5 557.05 22.75
 2 1 5 575.34 18.38
 2 -1 5 557.03 19.4
 -2 1 -5 615.11 20.99
 -2 1 -5 618.6 24.13
 2 -1 5 594.03 18.57
 -2 -1 -5 612.88 20.95
 -2 -1 -6 758.99 30.86
 -2 1 -6 890.48 32.13
 -2 -1 -6 890.42 29.6
 2 1 6 855.72 26.5
 2 -1 6 920.36 26.96
 2 -1 6 848.29 27.77
 2 1 6 851.81 27
 -2 1 -6 879.21 29.4
 2 1 6 767.36 26.71
 2 -1 6 874.1 27.97
 2 1 7 -1.31 9.44
 2 -1 7 -15.42 11.69
 2 -1 7 -3.48 10.79
 -2 -1 -7 2.5 8.65
 -2 1 -7 -0.19 6.57
 -2 1 -7 -1.36 8.96
 2 1 7 -15.08 10.44
 2 -1 7 -13.4 10.41
 -2 -1 -7 -4.96 7.09
 2 -1 7 -7.15 11.69
 2 -1 8 251.01 15.41
 2 1 8 266.35 15.42
 2 -1 8 289.5 15.82
 2 1 8 224.3 14.02
 2 -1 8 214.84 15.87
 2 1 8 249.56 15.72
 2 1 8 258.06 20.22
 2 -1 9 356.78 19.05
 2 -1 9 311.33 19.68
 2 1 9 343.57 25.4
 2 1 9 301.5 19.58
 2 1 9 330.41 17.42
 2 -1 10 68.36 16.85
 2 1 10 -11.23 17.48
 2 1 11 -36.03 18.95
 2 -1 11 249.12 22.94
 2 1 12 3.4 28.15
 2 1 12 -2.84 15.86
 2 -1 12 6.33 19.33
 2 -1 12 -8.68 14.6
 2 -1 12 -4.66 28.29
 2 -1 13 37.81 15.59
 2 1 13 132.57 29.77
 2 -1 13 123.31 29.22
 2 1 13 -5.81 13.81
 2 1 14 -7.65 12.62
 2 1 14 17.68 26.33
 2 -1 14 22.83 25.58
 2 -1 14 9.11 14.4
 2 -1 15 39.47 22.93
 2 1 15 57.34 22.39
 2 -1 15 12.74 12.03
 2 1 16 6.28 15.61
 2 -1 16 20.99 15.58
 -2 -2 17 18.98 14.13
 -2 -2 17 -35.88 19.86
 -2 2 16 59.87 15.91
 -2 -2 16 54.42 22.98
 -2 2 15 46.24 17.72
 -2 -2 15 18.06 16.76
 -2 2 14 -20.99 22.86
 -2 -2 14 -0.15 16.33
 -2 2 14 -5.65 18.87
 -2 -2 14 21.75 22.36
 -2 -2 13 -2.67 25.96
 -2 2 13 -12.9 24.38
 -2 2 13 -1.8 20.11
 -2 -2 12 24.63 16.86
 -2 -2 12 -18.71 25.57
 -2 2 12 34.88 24.29
 -2 2 12 7 21.37
 -2 2 11 408.36 20.96
 -2 2 11 381.22 24.34
 -2 -2 11 426.08 18.78
 -2 2 10 361.63 15.24
 -2 -2 10 391.03 16.61
 -2 -2 10 346.78 19.68
 -2 2 10 361.69 18.36
 -2 2 10 418.96 22.08
 -2 -2 10 355.22 15.68
 -2 2 9 280.99 12.67
 2 -2 -9 297.11 15.51
 2 -2 -9 284.74 20.1
 -2 2 9 308.4 15.56
 -2 -2 9 302.74 13.76
 -2 -2 9 270.57 15.58
 -2 2 9 323.29 18.04
 -2 -2 9 310.14 13.18
 -2 2 8 162.87 9.34
 2 -2 -8 210.37 13.12
 -2 2 8 182.42 11.94
 -2 -2 8 187.88 9.76
 2 -2 -8 175.39 11.2
 2 -2 -8 181.17 8.08
 -2 -2 8 187.91 10.48
 -2 -2 8 197.38 22.91
 2 -2 -8 152.6 15.25
 -2 -2 8 165.9 12.7
 -2 -2 7 62.24 7.34
 -2 -2 7 66.72 10.14
 -2 2 7 64.82 8.82
 2 -2 -7 69.78 8.23
 2 -2 -7 57.96 4.22
 2 -2 -7 57.68 7.23
 -2 -2 7 65.61 6.62
 2 -2 -7 62.85 11.83
 -2 2 7 61.09 7.78
 2 -2 -6 201.61 11.08
 2 -2 -6 175.33 13.6
 2 -2 -6 165.52 9.65
 -2 -2 5 7.28 15.7
 2 -2 -5 4.83 10.08
 -2 -2 5 8.37 6.14
 2 -2 -5 10.95 6
 2 -2 -5 11.24 6.79
 -2 -2 4 36.03 15.73
 2 -2 -4 24.85 7.19
 2 -2 -4 27.88 5.53
 2 -2 -3 6349.8 179.26
 -2 -2 3 7001.75 185.23
 -2 2 3 6447.29 181.04
 2 -2 -3 6837.71 182.26
 -2 -2 2 -1.35 13.73
 2 -2 -2 0.24 4.1
 2 2 -1 261.62 12.75
 -2 -2 1 243.94 14.32
 2 -2 -1 210.16 13.24
 -2 2 1 201.23 11.59
 -2 2 0 70.55 8.92
 2 -2 0 87.2 8.58
 -2 -2 0 80.98 8.03
 2 2 0 76.38 9.83
 2 2 0 68 14.58
 2 -2 1 262.03 11.91
 -2 -2 -1 210.93 12.23
 2 2 1 238.51 12.23
 -2 2 -1 217.45 11.89
 2 2 1 232.32 16.86
 -2 2 -2 342.79 14.02
 -2 -2 -2 256.57 12.29
 2 2 2 354.48 18.91
 -2 2 -2 353.1 16.93
 -2 -2 -2 278.36 12.94
 2 2 2 297.39 13.22
 2 2 3 648.39 22.72
 -2 -2 -3 619.99 22.38
 -2 -2 -3 602.19 21.94
 -2 2 -3 707.74 21.8
 -2 -2 -3 583.53 23.87
 -2 2 -3 673 25.41
 -2 -2 -4 325.42 14.08
 -2 2 -4 353.13 16.82
 -2 -2 -4 314.1 14.31
 -2 -2 -4 297.61 15.99
 -2 2 -4 343.88 12.86
 2 -2 5 1583.84 47.6
 2 2 5 1645.33 49.38
 -2 2 -5 1615.17 47.54
 2 -2 5 1714.63 49.14
 -2 -2 -5 1793.26 51.34
 -2 -2 -5 1866 51.59
 -2 -2 -5 1538.18 52.27
 2 -2 5 1790.83 47.89
 -2 2 -5 1842.33 54.16
 2 2 6 15.47 8.97
 2 2 6 10.58 7.56
 2 -2 6 7.3 9.87
 2 -2 6 14.03 8.94
 -2 -2 -6 10.93 6.58
 -2 -2 -6 16.76 8.6
 -2 2 -6 19.42 9.76
 -2 -2 -6 7.29 6.76
 2 2 6 3.45 12.09
 2 -2 6 -9.82 17.17
 -2 2 -6 3.56 1.79
 2 -2 7 470.4 32.53
 2 2 7 729.92 24.22
 2 -2 7 600.29 24.44
 2 -2 7 668.39 24.33
 -2 2 -7 676.5 28.34
 -2 -2 -7 728.84 26.28
 2 2 7 703.98 26.87
 2 -2 7 757.81 23.54
 -2 2 -7 579.87 24.83
 2 2 7 638.16 22.67
 2 -2 7 678.46 24.91
 2 -2 8 0.23 14.87
 2 2 8 8.24 13.4
 2 2 8 0.39 9.9
 2 -2 8 1.93 13.58
 2 2 8 5.04 18.55
 2 -2 8 -6.67 13.22
 2 -2 8 -4.16 13.25
 2 2 9 388.31 21.31
 2 -2 9 389.01 20.7
 2 2 9 372.35 26.58
 2 -2 9 362.33 24.08
 2 2 9 354.14 17.19
 2 2 10 -6.02 20.62
 2 2 10 14.77 27.44
 2 2 11 74.88 20.63
 2 2 11 86.43 31.32
 2 -2 11 154.67 19.09
 2 -2 12 -8.13 16.24
 2 2 12 -4.22 17.38
 2 2 12 -15.63 29.79
 2 -2 13 38.02 16.14
 2 2 13 134 31.22
 2 2 14 -16.64 13.26
 2 -2 14 11.65 13.49
 2 2 14 -9.07 25.75
 2 -2 15 359.07 23.56
 2 -2 15 36.7 10.74
 2 2 16 14.34 14.03
 2 -2 16 18.2 14.04
 -2 -3 17 6.74 12.88
 -2 -3 17 -22.74 17.7
 -2 -3 16 11.53 23.01
 -2 -3 16 124.89 18.72
 -2 3 15 -10.53 14.28
 -2 -3 15 -14.9 20.13
 -2 -3 15 5.7 23.46
 -2 -3 14 -1.22 24.13
 -2 3 14 6.98 15.94
 -2 -3 14 5.59 20.87
 -2 -3 14 11.43 17.8
 -2 -3 13 49.93 17.25
 -2 -3 13 45.63 20.38
 -2 -3 13 12.9 17.79
 -2 -3 13 59.58 24.57
 -2 -3 12 32.68 17.07
 -2 -3 12 -29.59 23.85
 -2 3 12 -36.35 18.77
 -2 -3 12 29.02 14.05
 -2 -3 12 -17.97 16.21
 -2 -3 11 18.01 13.69
 -2 -3 11 53.12 20.75
 -2 3 11 15.34 15.54
 -2 -3 11 27.15 17.32
 -2 -3 11 23.45 13.82
 -2 -3 10 192.09 14.55
 -2 3 10 164.99 15.44
 -2 -3 10 192.42 13.29
 -2 -3 10 165.51 17.74
 -2 -3 9 -0.04 9.65
 -2 -3 9 8.77 8.18
 -2 -3 9 7.27 13.78
 -2 3 9 2.56 11.5
 -2 -3 9 2.79 9.17
 -2 3 9 3.42 10.97
 -2 -3 8 85.23 9.24
 -2 -3 8 82.62 12.04
 -2 3 8 93.52 10.51
 2 -3 -8 77.86 8.63
 2 -3 -8 101.22 10.7
 -2 -3 8 86.57 8.38
 2 -3 -8 75.8 11.42
 -2 3 8 83.68 9.81
 -2 -3 7 11.58 7.27
 2 -3 -7 7.7 8.55
 -2 -3 7 8.29 6.38
 -2 -3 7 7.05 10.05
 2 -3 -7 9.91 5.98
 2 -3 -7 12.31 8.19
 -2 3 7 8.93 7.49
 2 -3 -6 481.51 21.58
 -2 3 6 467.38 15.7
 2 -3 -6 462.06 17.93
 -2 -3 6 570.55 30.7
 -2 -3 6 434 17.03
 -2 -3 6 489.39 15.76
 -2 -3 6 427.48 15.59
 2 -3 -6 547.6 21.02
 -2 -3 5 1.48 17.39
 2 -3 -5 6.08 9.15
 2 -3 -5 4.06 6.93
 2 -3 -5 6.04 5.49
 2 -3 -4 1138.05 36.61
 -2 -3 4 1196.99 43.55
 2 -3 -4 1081.68 33.6
 -2 -3 3 428.79 24.04
 2 -3 -3 420.21 14.58
 2 -3 -2 191.66 12.58
 -2 -3 2 198.83 18.75
 -2 3 2 185.97 8.07
 -2 -3 1 48.45 14.61
 -2 3 1 57.8 5.5
 2 -3 -1 56.71 9.35
 -2 3 1 49.43 7.07
 -2 3 0 801.29 25.85
 2 3 0 725.8 25.91
 2 -3 0 841.48 28.26
 2 3 0 661.61 30.19
 -2 3 0 813.3 25.97
 2 -3 0 887.69 24.59
 2 3 1 740.9 28.85
 -2 3 -1 691.37 22.55
 2 3 1 694.03 23.32
 2 3 2 359.84 18.69
 -2 3 -2 336.3 12.18
 -2 -3 -2 359.87 15.11
 -2 -3 -3 201.13 11.57
 2 3 3 188.77 12.09
 -2 3 -3 218.47 15.17
 -2 3 -3 207.61 8.97
 2 -3 4 2814.53 74.83
 2 -3 4 2484.8 72.97
 -2 3 -4 2604.81 73.24
 -2 -3 -4 2675.08 76.91
 2 3 4 2558 74.73
 2 3 4 2698.32 77.77
 -2 -3 -4 2475.51 77.43
 2 -3 4 2507.32 72.9
 2 3 4 2552.34 73.27
 -2 -3 -4 2788.93 76.59
 -2 3 -5 131.92 12.5
 2 -3 5 130.27 11.5
 -2 -3 -5 125.45 9.55
 2 3 5 108.82 13.23
 -2 -3 -5 122.25 10.31
 2 -3 5 113.25 8.18
 -2 -3 -5 111.57 10.84
 2 -3 5 100.73 7.92
 -2 -3 -6 1170.38 37.06
 2 -3 6 1120.46 34.75
 2 3 6 1131.69 36.36
 2 -3 6 1147.94 33.32
 -2 3 -6 1154.79 39.54
 -2 -3 -6 1101.88 37.5
 2 -3 6 1037.59 32.69
 2 -3 6 989.94 32.55
 -2 -3 -6 956.97 37.58
 2 -3 6 1307.33 57.49
 -2 3 -7 16.22 9.93
 2 3 7 4.6 12.47
 2 -3 7 16.33 12.09
 2 -3 7 -3.09 21.04
 2 3 7 8.51 15.9
 2 -3 7 17.71 11.65
 2 -3 8 597.6 26.51
 2 3 8 691.08 25.96
 2 -3 8 694.12 25.07
 2 -3 8 583.09 25.1
 2 3 8 673.02 30.96
 2 -3 9 -20.61 17.22
 2 -3 9 3.8 18.8
 2 -3 9 -14.63 18.53
 2 -3 9 -7.01 19.71
 2 -3 10 516.69 27.43
 2 -3 10 469.1 24.61
 2 3 10 528.8 28.14
 2 3 10 603.25 35.81
 2 -3 10 477.91 30.34
 2 -3 10 381.47 27.44
 2 -3 11 3.79 17.52
 2 -3 11 -18.93 17.98
 2 3 11 -4.93 28.51
 2 3 11 -2.8 20.54
 2 -3 11 -2.83 24.11
 2 -3 12 43.68 19.33
 2 -3 12 42.6 16.74
 2 3 12 62.46 28.45
 2 3 12 25.3 18.94
 2 3 13 13.79 27.61
 2 -3 13 -18.96 16.15
 2 -3 14 112.99 13.51
 2 3 14 143.82 23.9
 2 3 15 -29.41 19.48
 2 -3 16 35.08 11.94
 -2 -4 17 -0.52 13.99
 -2 -4 17 9.44 10.55
 -2 -4 15 14.47 16.76
 -2 -4 15 4.55 16.6
 -2 -4 15 38.34 22.83
 -2 -4 14 5490.31 58.36
 -2 -4 14 -3.86 24.36
 -2 -4 13 -0.13 17.24
 -2 -4 13 9.69 18.59
 -2 -4 13 0.07 14.95
 -2 -4 13 -2.69 19.64
 -2 -4 12 178.08 18.33
 -2 -4 12 159.8 21.9
 -2 -4 11 70.24 17.68
 -2 -4 11 60.24 20.15
 -2 -4 11 29.65 19.71
 -2 -4 11 55.42 16.13
 -2 -4 10 328.49 21.2
 -2 -4 10 339.01 18.13
 -2 -4 10 370.52 18.19
 -2 -4 9 155.39 16.02
 -2 -4 9 163.89 12.46
 -2 -4 9 169.95 13.71
 -2 -4 8 303.42 16.86
 2 -4 -8 284.38 15.76
 -2 -4 8 323.46 13.73
 2 -4 -7 667.41 26.46
 2 -4 -7 528.32 25.45
 -2 4 7 526.18 18.85
 -2 -4 7 543.95 18.85
 -2 -4 7 517.19 20.46
 -2 4 7 560.71 18.63
 -2 -4 7 642.1 35.69
 2 -4 -7 541.26 21.75
 2 -4 -6 738.15 27.67
 -2 4 6 636.06 20.97
 -2 -4 6 771.75 37.32
 -2 -4 6 610.28 22.09
 2 -4 -6 682.52 27.68
 -2 -4 6 648.38 20.79
 -2 4 6 606.72 20.18
 2 -4 -6 670.28 23.38
 -2 4 5 641.04 21.16
 -2 -4 5 627.59 20.79
 -2 -4 5 661.34 20.84
 2 -4 -5 724.37 23.4
 2 -4 -5 789.89 27.7
 -2 -4 5 852.47 36.72
 -2 4 4 192.08 9.61
 2 -4 -4 208.93 9.79
 2 -4 -4 229.94 13.76
 -2 -4 4 189.15 8.52
 -2 -4 4 198.76 8.34
 -2 -4 4 245.08 21.72
 -2 -4 3 1030.65 39.5
 -2 4 3 1041.94 29.49
 -2 -4 3 847.57 26.8
 -2 4 3 1008.06 27.45
 -2 -4 3 854.37 26.75
 -2 -4 2 1483.57 50.44
 -2 4 2 1412.32 42.31
 2 -4 -2 1431.44 45.9
 2 -4 -1 1759.78 34.82
 -2 4 1 1918.11 29.95
 -2 4 0 2531.87 68.83
 2 -4 0 2688.1 71.21
 2 4 1 1692.55 49.09
 2 4 1 1642 51.86
 2 4 1 1535.21 47.28
 2 4 2 403.37 16.68
 2 4 2 390.48 13.98
 -2 -4 -3 1197.8 35.42
 2 4 3 1252.22 37.98
 2 -4 3 1227.6 35.33
 2 4 3 1218.62 35.97
 2 4 4 139.09 9.55
 2 -4 4 143.87 7.84
 2 4 4 129.75 12.8
 2 -4 4 150.66 7.63
 2 -4 5 27.89 7.58
 -2 4 -5 38.61 10.52
 2 -4 5 39.05 11.07
 2 4 5 19.06 9.86
 2 4 5 33.6 13.49
 2 -4 5 30.03 7.67
 2 -4 6 342.85 16.81
 2 4 6 305.02 20.11
 2 -4 6 309.92 13.71
 2 -4 6 300.49 14.05
 2 4 7 216.85 21.37
 2 -4 7 215.79 15.09
 2 -4 7 212.58 15.38
 2 -4 7 196.32 13.26
 2 -4 8 25.93 15.01
 2 4 8 32.99 17.45
 2 -4 8 21.86 16.04
 2 4 8 24.38 23.27
 2 4 9 320.7 24.35
 2 -4 9 246 24.34
 2 -4 9 272.08 20.65
 2 4 9 315.5 30.2
 2 -4 9 315.95 21.15
 2 -4 9 311.75 24.27
 2 -4 10 26.02 23.45
 2 4 10 31.69 22.53
 2 -4 10 41.44 23.19
 2 -4 10 92.06 21.62
 2 -4 11 231.41 21.44
 2 -4 11 236.03 21.19
 2 4 11 258.39 30.45
 2 -4 11 229.65 26.7
 2 4 11 224.41 23.24
 2 4 12 92 21.01
 2 4 12 98.56 27.86
 2 -4 12 103.88 16.34
 2 -4 12 44.89 25.14
 2 4 13 103.74 25.38
 2 4 13 27.09 17.6
 2 -4 13 78.52 14.18
 2 -4 13 81.97 23.99
 2 -4 14 11.05 10.3
 2 -4 14 -28.52 21.01
 2 4 15 30.98 15.61
 -2 -5 17 26.64 9.97
 -2 -5 16 2.42 17.12
 -2 -5 16 21.1 11.21
 -2 -5 16 13.31 11
 -2 -5 15 24.63 14.14
 -2 -5 15 78.96 15.39
 -2 -5 14 4.89 15.93
 -2 -5 14 -4.64 24.33
 -2 -5 14 -6.76 17.04
 -2 -5 13 56.79 15.13
 -2 -5 13 64.45 18.01
 -2 -5 13 71.86 17.3
 -2 -5 13 87.4 19.6
 -2 -5 12 43.16 19.89
 -2 -5 12 36.51 16.93
 -2 -5 12 44.84 17.76
 -2 -5 12 51.52 15.38
 -2 -5 11 12.92 17.81
 -2 -5 11 93.46 18.36
 -2 -5 10 5.74 16.6
 -2 -5 10 11.29 15.45
 -2 -5 10 -35.11 18.82
 -2 -5 9 1674.39 52.38
 -2 -5 9 1679.18 50.9
 -2 -5 8 187.24 16.34
 -2 -5 8 193.65 12.41
 -2 5 7 951.79 29
 -2 -5 7 845.67 28.36
 -2 -5 7 840.67 28.33
 -2 -5 7 931.31 30.49
 2 -5 -6 37.27 10.26
 2 -5 -6 31.39 6.29
 -2 5 6 39.33 9.65
 -2 -5 6 32.66 10.77
 -2 -5 6 31.86 7.75
 -2 -5 6 35.3 7.5
 -2 5 5 49.89 9.69
 -2 -5 5 67.83 18.52
 2 -5 -5 62.32 11.45
 -2 -5 5 45.74 7.1
 -2 -5 5 50.69 6.55
 2 -5 -4 231.24 9.71
 -2 -5 4 276.7 10.46
 -2 -5 3 171.69 8.86
 -2 -5 3 232.44 21.76
 2 5 -3 222.49 15.39
 2 -5 -3 213.03 14.45
 -2 5 3 209.25 9.44
 -2 5 3 212.63 11.56
 -2 -5 2 438.24 24.77
 2 -5 -2 450.09 19.66
 2 5 -2 496.58 21.91
 -2 5 2 483.43 16.19
 2 5 -1 643.82 26.49
 2 5 -1 749.58 26.61
 2 5 -1 887.43 30.96
 -2 5 1 947.83 27.3
 -2 -5 1 705.12 22.74
 2 -5 -1 903.64 30.32
 2 -5 0 7.98 9.17
 2 5 0 10.39 7.32
 -2 -5 0 3.28 4.13
 2 5 0 8 6.52
 -2 5 0 7.48 7.94
 2 5 0 13.02 10.17
 2 -5 1 972.9 30.51
 2 5 1 855.72 27.99
 2 5 1 733.73 25.34
 2 5 1 990.88 31.29
 2 -5 1 775.58 22.85
 2 5 2 -10.36 9.66
 2 5 2 -15.16 10.82
 2 -5 2 0.16 5.22
 2 -5 3 23.33 6.26
 2 5 3 16.79 9.25
 2 5 3 19.24 11.73
 2 5 3 25.15 9.51
 2 -5 3 18.9 6.02
 2 5 4 34.37 13.23
 2 5 4 40.9 10.22
 2 -5 4 40.78 7.55
 2 -5 4 43.48 7.37
 2 5 5 -0.95 12.29
 2 -5 5 4.3 12.04
 2 -5 5 3.47 8.67
 2 -5 5 1.24 7.99
 2 5 5 1.1 15.73
 2 -5 6 42.65 10.39
 2 -5 6 34.94 9.6
 2 5 6 46.77 18.59
 2 -5 6 47.45 13.82
 2 -5 7 4.56 14.29
 2 5 7 -5.86 22.05
 2 -5 7 -0.78 11.39
 2 -5 7 1.71 10.2
 2 -5 8 54.63 16.09
 2 -5 8 45.35 18.11
 2 5 8 13.82 24.88
 2 -5 8 54.33 14.34
 2 -5 9 270.88 24.85
 2 -5 9 305.65 22.29
 2 -5 9 327.52 21.59
 2 5 10 143.35 23.72
 2 -5 10 91.39 22.77
 2 5 10 110.23 27.35
 2 -5 10 120.31 20.8
 2 -5 10 115.09 20.06
 2 -5 11 32.69 23.74
 2 -5 11 59.24 18.66
 2 5 11 58.48 22.77
 2 5 11 40.46 27.03
 2 -5 11 62.25 20.01
 2 -5 12 153.09 15.99
 2 -5 12 156.78 23.1
 2 5 12 201.99 27.34
 2 -5 13 85.58 12.47
 2 5 13 91.7 23.59
 2 -5 14 -0.06 16.88
 2 5 14 122.7 21.1
 2 -5 15 7.43 11.22
 -2 -6 16 102.06 14.07
 -2 -6 15 -18.89 12.14
 -2 -6 15 -3.24 10.3
 -2 -6 14 350.42 19.72
 -2 -6 14 419.82 25.87
 -2 -6 13 25.76 14.33
 -2 -6 13 -23.9 18.94
 -2 -6 13 -16.39 15.35
 -2 -6 12 193.61 17.4
 -2 -6 12 244.37 20.84
 -2 -6 12 248.19 18.36
 -2 -6 11 39.41 14.77
 -2 -6 11 35.5 19.64
 -2 -6 11 44.52 14.9
 -2 -6 10 14.62 17.17
 -2 -6 10 26.7 15.07
 -2 -6 10 -12.34 15.81
 -2 -6 9 118.83 15.66
 -2 -6 9 109.88 16.62
 -2 -6 9 98.68 15.88
 -2 -6 8 752.25 28.99
 -2 -6 8 779.68 28.58
 -2 -6 8 775.38 28.61
 -2 6 7 44.23 13.27
 -2 -6 7 50.24 10.46
 -2 -6 7 42.17 11.52
 -2 6 6 1061.15 32.61
 -2 -6 6 996.57 31.32
 -2 -6 5 15.17 8.16
 -2 6 5 25 11.95
 -2 -6 4 771.5 35.75
 -2 -6 4 607.35 20.37
 -2 -6 3 27.27 6.21
 -2 6 3 36.59 7.48
 -2 -6 3 26.83 6.26
 -2 -6 3 47.66 15.5
 -2 -6 3 30.53 5.9
 2 -6 -2 0.3 9.71
 -2 -6 2 12.41 14.49
 -2 -6 2 29.16 6.01
 2 6 -2 -4.68 11.39
 -2 6 2 -3.32 6.18
 -2 -6 2 9.59 6.13
 2 6 -1 136.39 10.97
 2 6 -1 158.64 15.36
 -2 6 1 156.96 10.82
 -2 -6 1 128.03 7.44
 2 -6 -1 158.85 13.86
 -2 -6 0 39 5.35
 2 6 0 40.33 8.6
 2 -6 0 38.11 5.24
 -2 6 0 41.66 7.74
 2 6 0 51.36 11.48
 2 -6 0 49.13 10.63
 2 -6 1 1.69 5.4
 2 6 1 -0.46 6.86
 2 -6 1 -2.85 9.37
 -2 6 -1 0.25 6.88
 -2 -6 -1 0.03 4.8
 -2 -6 -2 151.86 7.5
 2 -6 2 152.89 8.39
 2 -6 3 1.17 7.18
 2 6 3 7.72 11.78
 2 -6 3 3.02 6.86
 2 -6 4 12.24 8.28
 2 -6 4 11.6 8.39
 2 6 4 8.7 14.76
 2 -6 5 0.71 9.33
 2 6 5 -0.36 16.12
 2 -6 5 0.85 9.89
 2 -6 6 5.9 11.42
 2 6 6 15.29 20.63
 2 -6 6 6.07 10.15
 2 -6 7 106.52 14.98
 2 6 7 125.6 25.77
 2 -6 8 -6.05 15.46
 2 -6 8 14.03 17.95
 2 -6 9 3.11 14.46
 2 -6 9 10.85 18.14
 2 6 9 6.67 25.57
 2 -6 10 25.38 15.85
 2 -6 10 23.2 20.63
 2 -6 10 32.99 17.5
 2 -6 10 46.01 18.56
 2 6 10 45.47 25.3
 2 -6 11 28.9 18.75
 2 6 11 57.92 25.42
 2 -6 12 84.05 13.02
 2 6 12 99.73 22.5
 2 -6 12 90.36 19.51
 2 -6 12 103.26 17.15
 2 -6 13 -36.81 18.63
 2 -6 14 136 14.18
 -2 -7 15 155.56 10.15
 -2 -7 15 174.36 14.65
 -2 -7 14 260.4 20.61
 -2 -7 14 -17.5 12.66
 -2 -7 13 164.23 17.48
 -2 -7 13 172.68 15.16
 -2 -7 12 4.6 14.65
 -2 -7 12 -18.08 18.34
 -2 -7 12 -1.65 15.12
 -2 -7 11 142.99 19.13
 -2 -7 11 139.77 16.83
 -2 -7 11 101.29 16.45
 -2 -7 10 24.8 15.97
 -2 -7 10 12.72 18.66
 -2 -7 10 22.96 15.79
 -2 -7 9 3.22 13.91
 -2 -7 9 6.48 15.14
 -2 7 8 23.4 15.96
 -2 -7 8 -26.46 14.83
 -2 -7 7 517.01 22.98
 -2 -7 7 468.04 22.97
 -2 -7 6 2.93 11.45
 -2 7 6 -14.68 17.46
 -2 7 5 445.44 21.36
 -2 -7 5 407.26 17.02
 -2 -7 4 299.28 13.55
 -2 -7 4 297.57 13.6
 -2 -7 3 153.84 9.68
 -2 -7 3 163.05 10.03
 -2 -7 2 609.2 20.35
 -2 -7 2 591.96 20
 -2 -7 1 86.26 7.95
 -2 -7 1 84.49 7.76
 -2 -7 0 328.81 12.95
 2 -7 0 316.9 12.49
 2 -7 1 10.43 6.93
 -2 -7 -1 8.4 5.98
 2 -7 2 151.49 9.89
 -2 -7 -2 133.59 8.26
 -2 -7 -3 39.44 6.4
 2 -7 3 39.58 8.88
 -2 -7 -4 202.21 9.8
 2 -7 4 212.46 12.81
 2 -7 4 204.47 12.08
 2 -7 5 -0.89 9.78
 2 -7 5 1.19 10.97
 2 7 6 55.11 20.39
 2 -7 6 52.42 11.59
 2 -7 6 61.66 12.95
 2 7 7 -0.6 22.06
 2 -7 7 7.38 13.91
 2 -7 8 138.6 17.8
 2 -7 8 125.69 14.88
 2 7 8 137.53 22.48
 2 -7 9 73.66 17.94
 2 -7 9 68.65 14.46
 2 7 9 118.55 22.3
 2 -7 10 126.91 18.32
 2 -7 10 104.44 15.68
 2 -7 10 123.53 17.94
 2 -7 10 108.71 20.03
 2 -7 11 56.3 13.94
 2 -7 11 44.26 15.78
 2 -7 11 33.61 17.56
 2 -7 12 3.72 9.29
 2 -7 12 19.54 15.21
 2 -7 13 29.71 12.56
 2 -7 13 23.03 9.98
 2 -7 14 -0.33 7.44
 -2 -8 15 3.54 7.34
 -2 -8 14 19.22 8.35
 -2 -8 14 20.87 12.54
 -2 -8 13 -17.42 12.72
 -2 -8 13 12.56 11.25
 -2 -8 12 -1.27 14.58
 -2 -8 12 -25.06 13.68
 -2 -8 11 84.2 16.72
 -2 -8 11 56.9 14.46
 -2 -8 11 89.92 15.41
 -2 -8 10 1823.62 32.41
 -2 -8 10 -0.06 17.64
 -2 -8 9 231.03 17.67
 -2 -8 9 194.59 16.02
 -2 8 8 38.27 15.99
 -2 -8 8 13.71 13.39
 -2 8 7 9.29 18.62
 -2 -8 7 20.13 12.84
 -2 8 6 -23.39 20.94
 -2 -8 6 13.41 12.81
 -2 8 5 412.7 25.3
 -2 -8 5 411.31 18.5
 -2 -8 5 451.78 20
 -2 -8 4 44.54 11.08
 -2 8 4 45.53 20.14
 -2 -8 4 38.42 10.69
 -2 -8 3 523.01 20.09
 -2 -8 3 510.75 19.16
 -2 -8 2 15.24 8.83
 -2 -8 2 43.79 10.41
 -2 -8 1 540.84 18.82
 -2 -8 1 544.17 19.4
 2 -8 0 164.1 9.94
 -2 -8 0 172.45 10.17
 -2 -8 0 177.97 10.41
 -2 -8 -1 286.36 13.12
 2 -8 1 264.57 12.75
 -2 -8 -1 287.73 12.46
 2 -8 2 14.5 9.12
 -2 -8 -2 14.83 7.17
 2 -8 3 443.23 18.06
 2 -8 4 -2.89 11.21
 2 8 5 238.9 15.16
 2 -8 5 277.95 15.99
 2 -8 6 16.75 12.23
 2 -8 7 88.02 13.63
 2 -8 8 12.66 16.14
 2 -8 9 137.92 17.44
 2 -8 9 136.11 14.07
 2 -8 9 154.05 16.91
 2 -8 10 -0.05 15.77
 2 -8 10 -6.55 14.34
 2 -8 10 7.77 13.37
 2 -8 11 68.64 14.7
 2 -8 11 60.59 10.22
 2 -8 11 72.95 14.36
 2 -8 12 5.39 10.98
 2 -8 12 3.87 9.46
 2 -8 13 4.11 5.95
 -2 -9 13 -6.35 7.08
 -2 -9 12 2.62 9.5
 -2 -9 11 9.83 12.19
 -2 -9 11 18.99 11.7
 -2 -9 10 -1.49 12.76
 -2 -9 10 1.66 13.74
 -2 -9 10 -0.41 11.85
 -2 -9 9 18.26 12.18
 -2 -9 8 0.72 12.43
 -2 -9 7 15.65 12.17
 -2 -9 7 7.41 14.21
 -2 9 7 23.18 17.04
 -2 9 6 2.74 18.25
 -2 -9 6 30.17 11.5
 -2 -9 6 24.74 13.27
 -2 -9 5 5.03 12.7
 -2 -9 5 -7.67 10.61
 -2 9 5 -1.2 18.19
 -2 9 4 -1.99 20.51
 -2 -9 4 0.16 12.44
 -2 -9 3 -14.09 11.93
 -2 9 3 1.54 21.63
 -2 -9 3 -4.99 9.43
 -2 -9 2 38.93 9.1
 -2 -9 2 -16.3 12.63
 -2 -9 1 21.47 9.99
 -2 -9 1 8.51 8.33
 -2 -9 0 493.55 18.01
 -2 -9 0 399.73 16.22
 2 -9 1 40.42 8.78
 -2 -9 -1 81.57 10.53
 2 -9 2 677.7 22.69
 -2 -9 -2 618.27 22.38
 2 -9 3 -15.37 9.71
 -2 -9 -3 -5 8.07
 -2 -9 -4 487.4 17.65
 2 -9 4 487.3 18.82
 -2 -9 -5 46.23 8.13
 2 -9 5 42.31 11.03
 2 -9 6 164.2 13.35
 -2 -9 -6 158.78 10.12
 2 -9 7 -2.57 12.03
 2 -9 8 190.81 16.24
 2 -9 8 189.22 13.68
 2 -9 9 1.82 13.24
 2 -9 9 -5.36 11.45
 2 -9 9 35.79 13.46
 2 -9 10 83.27 9.64
 2 -9 10 103.53 12.86
 2 -9 11 3.42 8.48
 2 -9 11 0.39 8.47
 2 -9 12 41.98 5.88
 -2 -10 12 6.07 8.54
 -2 -10 12 3.53 6.08
 -2 -10 11 25.73 8.82
 -2 -10 11 17.44 8
 -2 -10 10 -7.03 8.67
 -2 -10 10 -3.35 11.2
 -2 -10 9 -6.95 9.85
 -2 -10 9 71.53 14.07
 -2 -10 8 34.36 10.04
 -2 -10 8 39.98 12.33
 -2 10 7 7.92 13.64
 -2 -10 7 15.57 10.29
 -2 -10 7 21.86 12.45
 -2 -10 6 53.28 13.15
 -2 -10 6 43.7 10.14
 -2 10 5 67.54 19.57
 -2 -10 5 79.36 10.43
 -2 -10 5 47.74 14.78
 -2 10 4 207.68 22
 -2 -10 4 212.33 12.18
 -2 -10 4 189.54 14.55
 -2 -10 3 132.74 10.42
 -2 -10 3 135.56 13.28
 -2 10 3 110.22 21.86
 -2 -10 2 190.04 13.82
 -2 -10 1 211.45 13.56
 -2 -10 0 21.35 9.75
 -2 -10 -1 282.62 14.32
 2 -10 2 3.81 8.53
 -2 -10 -2 2.28 8.41
 2 -10 3 337.09 15.35
 -2 -10 -3 357.76 14.91
 2 -10 4 36.49 9.95
 2 10 4 27.27 11.53
 -2 -10 -4 35.92 7.74
 2 -10 5 72.89 10.55
 -2 -10 -5 71.27 8.06
 2 -10 6 -0.27 9.37
 2 -10 7 23.72 9.28
 2 -10 7 36.66 12.49
 2 -10 8 189.92 13.13
 2 -10 8 13.99 11.52
 2 -10 9 40.55 9.18
 2 -10 10 14.01 6.9
 -2 -11 10 6.64 5.81
 -2 -11 10 -1.27 5.85
 -2 -11 9 55.15 8.6
 -2 -11 9 38.24 8.33
 -2 -11 8 4.75 9.12
 -2 -11 7 85.21 11.91
 -2 11 6 93.85 17.09
 -2 -11 6 -6.1 10.61
 -2 11 5 4.3 16.16
 -2 -11 5 47.56 10.97
 -2 11 4 7.99 16.45
 -2 -11 4 0.72 10.04
 -2 11 3 120.83 18.48
 -2 -11 3 133.3 11.64
 -2 -11 2 3.19 9.63
 -2 -11 1 29.08 9.59
 -2 11 0 6.68 15.8
 -2 -11 0 6.23 8.9
 -2 -11 -1 11.06 8.6
 -2 11 -1 22.7 15.77
 2 11 2 60.72 13.73
 -2 11 -2 87.47 14.47
 -2 -11 -2 77.92 9.09
 2 11 3 -0.54 11.08
 -2 11 -3 6.25 12.1
 -2 -11 -3 5.19 7.26
 -2 11 -4 27.21 10.2
 2 -11 5 -8.7 7.21
 -2 11 -5 50.56 8.69
 2 -11 6 18.75 9.46
 2 -11 7 33.55 8.52
 2 -11 8 5.21 6.65
 -2 -12 7 3.62 6.38
 -2 -12 7 4.43 6.01
 -2 -12 6 9.05 6.77
 -2 -12 5 -1.86 7.44
 -2 -12 4 31.97 7.76
 -2 12 4 51.48 12.55
 -2 12 3 -8.17 12.93
 -2 -12 3 14.97 8.02
 -2 -12 2 64.21 8
 -2 -12 1 -1.49 7.05
 -2 12 0 22.33 12.12
 -2 -12 0 -9.28 7.54
 -2 12 -1 -5.02 10.77
 2 12 1 26.86 10.88
 2 12 2 19.96 9.29
 -2 12 -2 5.01 9.54
 -2 12 -3 41.04 8.21
 -2 12 -4 2.33 5.99
 2 -12 5 3.91 6.4
 2 13 -3 3.01 5.03
 2 13 -2 -0.1 5.41
 -2 13 0 18.66 6.32
 -3 0 18 133.93 14.05
 -3 0 16 106.52 21.03
 -3 0 15 21.98 21.46
 -3 0 14 402.83 26.35
 -3 0 14 341.87 27.3
 -3 0 13 256.85 27.27
 -3 0 12 553.68 28.63
 -3 0 12 543.73 24.37
 -3 0 11 11.38 17.93
 -3 0 11 -0.05 13.68
 -3 0 11 5.71 16.81
 -3 0 11 3.13 10.59
 -3 0 10 666.91 26.79
 -3 0 10 741.23 24.45
 -3 0 10 701.31 25.11
 -3 0 10 722.97 28.28
 3 0 -9 -1.76 13.18
 -3 0 9 -3.86 11.22
 -3 0 9 -0.77 8.79
 -3 0 9 2.14 7.7
 -3 0 8 220.09 13.11
 3 0 -8 212.63 18.83
 -3 0 8 248.38 10.58
 -3 0 7 6.36 8.66
 -3 0 7 -2.96 4.81
 -3 0 6 761.38 25.04
 3 0 -5 -2.72 10.71
 -3 0 5 -4.09 8.29
 3 0 -4 205.69 7.96
 3 0 -4 197.3 13.89
 3 0 -3 -0.18 10.72
 3 0 -3 0.02 3.97
 3 0 -2 408.65 16.78
 3 0 -1 -1.14 4.29
 3 0 -1 -0.93 6.74
 -3 0 1 0.51 5.66
 -3 0 0 2675.33 72.48
 3 0 0 2698.14 71.66
 3 0 0 2644.24 76.61
 3 0 1 1.91 12.13
 -3 0 -1 0.61 5.91
 3 0 2 460.42 20.48
 -3 0 -2 374.93 14.35
 3 0 3 -2.71 11.8
 3 0 3 -1.68 11.05
 -3 0 -3 -0.53 5.73
 3 0 4 993.9 31.82
 3 0 4 974.21 30.19
 -3 0 -4 1011.8 32.66
 3 0 4 929.93 31.53
 -3 0 -4 1016.97 36.71
 -3 0 -5 -4.61 9.4
 3 0 5 1.94 11.18
 3 0 5 4.22 7.98
 3 0 5 1.29 6.99
 -3 0 -5 1.96 6.12
 3 0 5 0.91 8.79
 3 0 6 719.74 25.44
 3 0 6 804.26 24.75
 3 0 6 763.19 26.84
 -3 0 -6 711.27 26.76
 -3 0 -6 719.14 30.39
 3 0 7 2.11 15.81
 3 0 7 -0.85 10.61
 3 0 7 0.62 12.66
 3 0 7 10.8 11.32
 3 0 8 451.13 25.39
 3 0 8 486.01 20.12
 3 0 8 465.65 21.95
 3 0 9 -0.54 15.83
 3 0 9 66.71 19.69
 3 0 10 -6.97 20.76
 3 0 10 -26.08 19.63
 3 0 11 0.08 17.46
 3 0 12 60.85 17.94
 3 0 13 4.23 16.95
 3 0 14 31.65 15.47
 3 0 14 192.83 26.36
 3 0 15 -3.18 10.52
 3 0 15 -5.01 16.84
 3 0 16 9.49 9.95
 -3 1 18 -5.58 11.49
 -3 -1 18 6.05 12.19
 -3 -1 17 49.39 17.41
 -3 1 17 141.34 20.93
 -3 1 16 126.3 20.07
 -3 -1 16 119.29 21.7
 -3 1 15 36.03 20.48
 -3 -1 15 29.37 22.18
 -3 -1 15 -5.81 18.36
 -3 1 14 10.07 20.8
 -3 -1 14 5.38 23.79
 -3 -1 14 -3.05 18.21
 -3 -1 13 60.89 17.8
 -3 1 13 54.06 24.33
 -3 -1 13 -1.32 24.66
 -3 -1 13 29 20.17
 -3 1 12 659.37 29.37
 -3 -1 12 433.76 23.41
 -3 -1 12 568.5 28.41
 -3 -1 12 318.11 26.46
 -3 -1 12 558.33 23.34
 -3 1 11 1169.75 36.19
 -3 -1 11 1125.57 36.53
 -3 -1 11 1117.22 33.2
 -3 -1 11 845.99 33.62
 -3 -1 11 705.72 34.61
 -3 -1 10 529.03 19.26
 -3 1 10 491.94 22.07
 -3 -1 9 1597.6 42.64
 -3 1 9 1526.5 43.9
 -3 -1 9 1438.49 42.6
 3 -1 -9 1377.13 52.57
 -3 1 9 1463.94 42.52
 -3 1 8 414.95 16.48
 3 -1 -8 353.98 22.22
 -3 -1 8 380.45 15.02
 -3 1 8 397.8 15.24
 -3 -1 8 439.53 14.77
 -3 1 7 455.99 15.67
 -3 1 7 437.32 16.49
 -3 -1 7 421.86 15.56
 -3 -1 7 475.93 15.36
 3 -1 -7 459.95 24.2
 3 1 -6 79.78 15.26
 -3 -1 6 67.13 13.86
 3 -1 -6 36.47 2.17
 -3 1 6 64.65 6.51
 -3 1 6 70.64 7.52
 -3 -1 6 75.66 7.67
 -3 -1 5 143.25 14.52
 -3 -1 5 147.52 12.75
 -3 1 5 142.69 9.63
 3 1 -5 136.4 15.03
 3 1 -4 22.08 12.78
 3 -1 -4 20.64 9.64
 -3 -1 4 25.12 11.42
 -3 1 4 35.46 9.42
 3 1 -3 377.14 13.97
 -3 -1 3 388.47 17.48
 3 1 -3 427.21 19.59
 -3 1 2 512.65 16.22
 3 1 -2 524.89 17.24
 3 1 -1 71.4 10.29
 3 1 -1 64.36 6.8
 3 1 0 104.5 8.03
 -3 1 0 88.16 5.15
 -3 -1 0 75.25 7.39
 3 1 0 101.98 7.23
 3 1 0 103.28 14.91
 3 -1 0 101.98 11.94
 3 -1 1 183.73 13.09
 -3 1 -1 153.01 7.2
 -3 -1 -1 145.65 9.26
 3 1 1 150.24 8.54
 -3 -1 -1 165.51 9.27
 3 1 1 183.18 15.72
 -3 -1 -2 338.08 14.05
 -3 1 -2 333.38 12.56
 3 1 2 353.22 14.19
 3 -1 2 362.14 17.88
 3 1 2 367.72 20.22
 3 1 3 -0.6 12.18
 3 -1 3 -0.55 9.66
 -3 -1 -3 -0.91 5.8
 -3 1 -3 2.15 4.72
 3 1 4 342.38 12.71
 -3 -1 -4 351.83 14.69
 3 1 4 326.55 15.32
 3 -1 4 325.02 14.1
 -3 1 -4 318.39 13.27
 -3 1 -4 360.02 18.79
 3 1 4 356.23 13.81
 -3 -1 -4 341.86 14.96
 3 -1 4 360.55 12.86
 3 -1 5 376.55 16.19
 3 1 5 380.37 14.59
 -3 -1 -5 360.31 15.97
 3 1 5 374.02 17.12
 3 -1 5 406.63 14.53
 -3 1 -5 339.57 14.85
 -3 -1 -5 358.85 16.55
 -3 1 -5 387.73 19.85
 3 1 5 384.47 15.36
 3 1 6 163.78 14.31
 3 -1 6 178.09 13.84
 3 1 6 159.35 11.63
 3 -1 6 185.94 11.53
 3 1 6 172.21 11.65
 -3 -1 -6 142.86 10.57
 3 -1 6 174.96 13.41
 -3 1 -6 137.81 10.09
 -3 -1 -6 178.86 11.86
 3 -1 6 187.44 15.16
 -3 1 -6 168.64 14.46
 3 -1 7 847.74 28.97
 3 -1 7 686.48 26.74
 3 1 7 679.06 26.09
 3 1 7 772.38 26.13
 3 -1 7 794.72 25.76
 3 -1 7 741.67 28.2
 3 -1 8 42.59 14.2
 3 -1 8 37.36 17.16
 3 1 8 41.39 16.71
 3 1 8 41.85 14.5
 3 -1 8 35.99 13.36
 3 -1 8 39.61 18.53
 3 -1 9 638.16 29.93
 3 -1 9 694 28.02
 3 -1 9 584.96 33.08
 3 1 9 827.78 31.3
 3 -1 9 760.04 30.87
 3 -1 10 -6.18 20.05
 3 -1 10 15.88 28.06
 3 1 11 77.37 20.04
 3 -1 11 78.66 19.55
 3 -1 11 150.82 21.05
 3 -1 11 106.4 28.08
 3 1 12 -5.55 17.73
 3 -1 12 -11.33 17.3
 3 1 12 0.9 29.56
 3 1 13 52.4 16.19
 3 -1 13 82.36 17.71
 3 1 14 2.58 23.8
 3 -1 15 42.54 9.94
 3 1 15 74.07 11.72
 3 1 15 91.05 17.82
 3 -1 16 3.64 9.45
 3 1 16 -2.14 9.67
 -3 -2 18 25.19 11.14
 -3 2 17 261.83 17.96
 -3 -2 17 18.58 15.71
 -3 2 16 37.48 17.08
 -3 -2 16 10.13 20.27
 -3 2 15 16.26 19.49
 -3 -2 15 -27.3 20.78
 -3 -2 14 25.9 16.32
 -3 2 14 54.32 20.07
 -3 -2 13 91.79 18.12
 -3 -2 13 -13.08 16.83
 -3 -2 12 16.01 17.11
 -3 -2 12 11.01 10.55
 -3 -2 11 214.11 17.84
 -3 -2 11 276.73 15.35
 -3 -2 11 499.95 24.4
 -3 2 11 483.83 22.7
 -3 -2 11 512.84 19.78
 -3 -2 10 219.73 17.9
 -3 2 10 261.68 17.09
 -3 -2 10 207.19 12.29
 -3 -2 10 248.58 14.24
 -3 2 9 468.86 19.33
 -3 -2 9 426.95 19.45
 -3 2 9 437.14 17.42
 3 -2 -9 400.46 18.88
 -3 -2 9 431.04 15.96
 -3 -2 9 469.36 16.69
 -3 -2 8 236.53 14.38
 -3 2 8 277.09 13.82
 -3 -2 8 275.03 11.65
 -3 2 8 257.04 12.35
 3 -2 -8 250.82 13.51
 -3 -2 8 256.61 11.01
 3 -2 -8 240.11 18.42
 -3 2 7 1390.36 38.47
 3 -2 -7 1471.78 47.22
 -3 -2 7 1316.41 39.14
 -3 2 7 1416.49 39.19
 3 -2 -7 1415.96 41.39
 -3 -2 7 1395.89 38.13
 -3 -2 7 1411.97 38.3
 -3 -2 7 1538.29 51.12
 -3 -2 7 1297.49 38.26
 -3 -2 6 418.67 16.38
 3 -2 -6 400.34 20.48
 -3 2 6 363.38 13.78
 -3 -2 6 365.52 14.68
 -3 -2 6 440.26 24.34
 3 -2 -6 399.2 15.26
 -3 -2 6 393.92 13.35
 -3 2 5 1709.27 50.88
 3 -2 -5 1673.81 48.83
 -3 -2 5 1649.36 55.75
 -3 -2 4 363.53 19.56
 3 -2 -4 355.34 12.35
 -3 2 4 375.72 15.89
 -3 -2 3 1538.06 43.49
 -3 2 3 1551.99 42
 -3 -2 2 325.03 15.65
 3 2 -2 340.85 13.53
 -3 2 1 923.09 29.14
 3 2 -1 864.11 26.2
 3 2 -1 729.81 25.2
 -3 -2 1 752.18 24.65
 3 2 0 2046.73 63.44
 3 -2 0 2131.27 64.45
 3 2 0 2329.82 68.84
 -3 2 0 2457.73 66.96
 3 -2 1 372.13 16.57
 3 2 1 409.14 21.5
 -3 -2 -1 364.09 15.19
 3 2 1 388.86 14.86
 -3 2 -1 410.98 17.27
 -3 2 -2 1137.76 33.69
 3 -2 2 937.68 32.65
 3 2 2 1076.21 38.38
 -3 -2 -2 968.18 31.8
 3 2 2 971.33 31.54
 -3 2 -2 936.23 29.25
 3 2 3 251.46 11.05
 3 2 3 284.37 19.01
 -3 -2 -3 271.19 13.14
 3 2 3 252.28 13.82
 -3 2 -3 271.56 11.34
 3 2 3 284.41 13.66
 -3 -2 -3 267.72 12.86
 3 -2 4 1.27 9.15
 3 2 4 -1.17 7.84
 3 -2 4 1.36 9.58
 3 -2 4 2.09 6.94
 -3 -2 -4 -0.33 6.29
 -3 -2 -4 3.27 7.22
 -3 2 -4 6.37 5.49
 3 -2 4 -0.44 6.2
 3 2 4 -4.05 11.41
 -3 2 -4 -2.3 7.46
 3 -2 5 926.96 29.71
 3 -2 5 882.02 28.45
 3 -2 5 1015.05 31.07
 -3 2 -5 975.27 30.57
 -3 -2 -5 984.67 32.67
 3 2 5 857.62 31
 -3 -2 -5 964.83 32.4
 3 -2 5 998.33 28.67
 -3 2 -5 916.02 30.68
 -3 2 -5 1016.08 36.55
 3 2 5 977.51 29.54
 3 -2 6 141.32 11.08
 3 -2 6 133.75 12.43
 -3 -2 -6 120.43 10.57
 3 -2 6 119.09 13.09
 -3 2 -6 97.13 8.93
 -3 2 -6 126.97 13.61
 3 -2 7 617.57 24.96
 3 -2 7 568.29 23.78
 3 -2 7 589.83 24.66
 3 -2 7 619.93 22.81
 3 2 8 77.35 17.41
 3 -2 8 84.58 19.21
 3 -2 8 76.61 13.73
 3 -2 8 78.26 19.12
 3 -2 8 68.09 15.9
 3 2 9 190.44 22.09
 3 2 9 177.3 29.36
 3 -2 9 182.94 19.26
 3 -2 9 187.21 23.71
 3 -2 9 137.65 22.2
 3 2 10 -31.8 22.19
 3 -2 10 -14.76 26.9
 3 -2 10 3.84 19.98
 3 2 11 45.39 19.55
 3 -2 11 37.2 17.89
 3 -2 11 41.74 19.35
 3 2 11 41.54 28.94
 3 -2 11 31.14 25.93
 3 2 12 57.25 19.07
 3 -2 12 61.02 18.48
 3 -2 12 51.58 19.85
 3 2 12 52.67 29.09
 3 -2 12 58.19 26.7
 3 2 13 12.36 16.19
 3 -2 13 18.13 16.56
 3 2 13 1.03 26.27
 3 -2 13 12.81 24.38
 3 2 14 -4.21 17.01
 3 2 14 56.8 23.37
 3 -2 15 6.02 7.32
 3 2 15 14.18 15.52
 -3 -3 18 81.54 10.38
 -3 -3 17 3.36 13.86
 -3 -3 16 -19.94 21.18
 -3 3 15 6.25 15.62
 -3 -3 15 -12.14 20.24
 -3 -3 15 3.59 15.48
 -3 -3 14 53.18 22.97
 -3 -3 14 59.95 16.59
 -3 -3 14 70.01 22.23
 -3 3 14 64.41 17.5
 -3 -3 13 25.12 22.12
 -3 3 13 4.97 18.88
 -3 -3 13 68.11 23.26
 -3 -3 13 45.33 17.46
 -3 3 12 45.28 19
 -3 -3 12 44.01 22.06
 -3 -3 12 15.13 17.74
 -3 -3 12 19.6 13.93
 -3 -3 11 44.74 15.82
 -3 -3 11 25.46 14.89
 -3 3 11 65.21 17.04
 -3 -3 11 64.16 12.76
 -3 3 10 209.49 16.69
 -3 -3 10 181.81 18.67
 -3 -3 10 218.85 14.62
 -3 -3 10 195.71 12.71
 -3 -3 9 63 13.8
 -3 3 9 69.98 13.42
 -3 -3 9 68.65 9.42
 -3 -3 9 65.18 10.76
 -3 3 9 70.76 12.02
 -3 3 8 388.08 16.62
 -3 -3 8 364.05 17.8
 3 -3 -8 352.29 16.99
 -3 -3 8 396.86 14.83
 -3 -3 8 400.09 15.46
 -3 3 8 372.61 15.91
 -3 3 7 88.97 8.8
 -3 -3 7 99.11 18.4
 3 -3 -7 110.15 14.83
 -3 3 7 129.81 10.03
 3 -3 -7 85.91 8.56
 -3 -3 7 97.13 11.03
 3 -3 -7 113.39 11.8
 -3 -3 7 94.45 7.97
 -3 -3 7 99.02 8.47
 3 -3 -6 796 31.22
 -3 -3 6 732.02 24.38
 -3 3 6 728.81 23.73
 3 -3 -6 792.51 25.27
 3 -3 -6 822.75 29.78
 -3 -3 6 796.51 23.53
 -3 -3 6 745.49 23.41
 -3 3 6 731.93 23.35
 -3 -3 6 880.22 35.91
 -3 3 5 1317.44 39.62
 3 -3 -5 1471.55 41.18
 3 -3 -5 1477.39 46.02
 -3 -3 5 1372.8 39.6
 -3 -3 5 1350.41 39.71
 -3 -3 5 1517.11 49.88
 3 -3 -4 5597.46 151.53
 -3 3 4 5468 154.41
 3 -3 -4 5584.34 156.87
 -3 -3 4 5333.56 151.05
 -3 -3 4 5687.89 158.28
 -3 -3 3 0.36 11.42
 -3 3 2 2416.94 71.23
 3 3 -2 2266.63 69.99
 -3 -3 2 2470.67 71.82
 -3 -3 1 1511.49 47.03
 3 3 -1 1460.35 47.16
 3 -3 -1 1561.71 46.87
 3 3 0 4059.65 132.82
 -3 -3 0 4452.75 126.09
 3 3 0 4786.3 129.52
 -3 3 0 4457.24 128.8
 3 -3 0 4913.42 128.14
 3 3 1 777.64 34.05
 -3 3 -1 885.4 28.53
 3 -3 1 808.23 28.08
 3 3 2 1693.59 57.38
 -3 -3 -2 1707.13 51.7
 3 3 2 1811.82 51.67
 -3 3 -2 1729.02 50.22
 3 3 3 11.03 7.19
 3 3 3 16.12 12.7
 -3 -3 -3 12.79 8.21
 -3 3 -3 19.19 5.75
 3 3 3 14.36 8.26
 3 -3 3 14.93 5.83
 3 3 4 472.27 17.1
 -3 -3 -4 476.06 19.09
 -3 -3 -4 499.85 19.79
 -3 3 -4 449.67 16.57
 3 -3 4 438.36 15.76
 3 3 5 14.78 9.9
 3 -3 5 14.44 11.13
 3 -3 5 14.18 9.05
 -3 -3 -5 16.18 6.53
 -3 -3 -5 10.07 6.86
 -3 3 -5 9.66 5.72
 3 -3 5 12.18 7.47
 3 -3 6 607.35 38.53
 3 3 6 601.31 22.1
 3 -3 6 601.39 23.22
 3 -3 6 574.83 20.48
 3 -3 6 538.55 22.23
 3 -3 6 507.33 20.01
 3 -3 7 15.33 15.57
 3 -3 7 8.65 14.19
 3 -3 7 10.44 12.77
 3 3 7 9.59 20.43
 3 -3 8 263.44 20.08
 3 -3 8 341.43 18.96
 3 -3 8 287.94 21.68
 3 -3 8 287.33 22.86
 3 -3 9 23.58 21.97
 3 3 9 14.62 22.16
 3 -3 9 22.15 18
 3 3 9 19.36 27.56
 3 -3 9 20.46 21.37
 3 3 10 248.7 24.08
 3 -3 10 235.01 24.04
 3 3 10 252.02 30.31
 3 -3 10 282.49 21.24
 3 -3 10 243.6 25.57
 3 -3 11 49.69 24.01
 3 3 11 29.65 20.55
 3 -3 11 34.7 18.31
 3 -3 11 41.36 19.15
 3 3 11 29.97 27.37
 3 3 12 -0.07 19.07
 3 -3 12 15.9 17.88
 3 -3 12 -11.14 18.63
 3 3 12 -11.98 28.22
 3 -3 12 -19.63 23.77
 3 3 13 3.31 15.96
 3 -3 13 1.62 13.72
 3 -3 13 0.05 17.24
 3 3 13 -1.73 25.27
 3 -3 13 4.22 22.33
 3 3 14 193.96 22.01
 3 3 14 16.83 14.47
 3 3 15 -3.6 13.88
 3 -3 15 1.48 12.62
 -3 -4 17 6.72 10.85
 -3 -4 17 10.56 13.19
 -3 -4 16 216.26 24
 -3 -4 16 27.76 15.56
 -3 -4 15 31.57 23.36
 -3 -4 15 9.98 18.42
 -3 -4 15 17.22 14.71
 -3 -4 14 61.95 24.68
 -3 -4 14 53.64 16.59
 -3 -4 14 42.55 17.1
 -3 -4 13 80.12 20.34
 -3 -4 13 62.85 17.35
 -3 -4 13 78.2 16.92
 -3 -4 13 76.63 14.26
 -3 -4 12 22.07 15
 -3 -4 12 43.46 18.63
 -3 -4 12 22.19 16.88
 -3 -4 11 130.75 18.69
 -3 -4 11 157.23 22.15
 -3 -4 11 175.12 18.12
 -3 -4 10 282.55 20.87
 -3 -4 10 327.33 16.5
 -3 -4 10 320.93 18.02
 -3 -4 9 127.71 15.8
 -3 -4 9 134.35 11.65
 -3 -4 9 128.73 12.93
 -3 4 8 323.31 15.32
 -3 -4 8 288.75 17.21
 -3 -4 8 324.64 14.99
 -3 -4 8 322.71 14.24
 -3 4 7 474.49 17.08
 -3 4 7 454.89 17.14
 3 -4 -7 429 24.84
 -3 -4 7 453.29 18.75
 3 -4 -7 393.92 17.98
 -3 -4 7 508.29 31.05
 -3 -4 7 473.3 16.79
 3 -4 -7 530.97 25.04
 -3 -4 7 435.01 16.73
 -3 4 6 136.94 9.22
 3 -4 -6 132.98 8.94
 -3 4 6 141.09 9.74
 3 -4 -6 153.09 15.3
 -3 -4 6 155.49 19.61
 -3 -4 6 124.39 10.85
 -3 -4 6 115.81 8.4
 -3 -4 6 138.18 8.39
 3 -4 -6 166 15.13
 -3 4 5 2543.24 72.78
 -3 4 5 2596.27 73.18
 -3 -4 5 2522.86 73.22
 -3 -4 5 2961.83 85
 -3 -4 5 2595.14 72.87
 3 -4 -5 2955.93 82.58
 3 -4 -5 2562.85 74.18
 -3 -4 4 215.99 17.83
 -3 -4 4 179.36 8.18
 -3 -4 3 3219.54 87.53
 -3 4 3 2797.04 79.5
 3 4 -3 3351.99 86.02
 -3 4 3 2740.5 78.61
 -3 -4 3 2798.6 79.3
 3 -4 -3 3099.19 86.32
 3 -4 -2 25.95 6.05
 -3 -4 2 31.92 10.54
 3 -4 -2 36.81 10.49
 3 4 -2 29.85 10.07
 -3 -4 2 21.62 4.55
 -3 -4 1 1712.52 48.31
 3 -4 -1 1696.84 44.91
 -3 4 1 1761.56 47.91
 -3 4 1 1704.12 43.52
 -3 4 0 31.66 6.77
 -3 -4 0 33.54 7.31
 3 4 0 1.71 12.64
 3 4 0 23.83 9.17
 3 4 0 24.95 6.85
 -3 4 0 25.57 4.51
 3 4 0 26.98 8.99
 3 4 1 178.26 17.97
 -3 -4 -1 259.52 9.51
 -3 4 -1 381.62 14.07
 -3 4 -1 364.11 13.9
 3 4 1 427.41 17.31
 3 4 1 325.24 11.62
 3 4 2 254.19 19.88
 3 4 2 290.2 12.47
 3 4 2 382.41 17.55
 3 -4 2 307.98 11.42
 -3 4 -2 338.5 13.72
 3 4 3 415.45 16
 -3 -4 -3 432.19 19.12
 -3 4 -3 450.07 16.28
 3 -4 3 410.14 14.85
 -3 -4 -4 156.97 11.96
 3 4 4 154.67 11.14
 3 4 4 191.37 14.21
 3 -4 4 157.17 9.51
 3 4 5 9.33 11.21
 3 -4 5 4.67 8.16
 3 4 5 -4.73 15.67
 3 4 6 19.53 13.28
 3 -4 6 18.51 11.73
 3 4 6 12.03 19.3
 3 -4 6 17.76 9.82
 3 -4 7 9.36 13.82
 3 4 7 10.4 23.32
 3 -4 7 5.44 11.82
 3 -4 7 22.52 16.72
 3 -4 8 40.64 16.33
 3 4 8 34.29 27.2
 3 -4 8 38.1 19.78
 3 -4 9 277.58 24.96
 3 -4 9 186.57 21.62
 3 -4 9 236.35 25.28
 3 -4 10 66.91 21.34
 3 4 10 89.14 22.03
 3 -4 10 92.66 22.2
 3 -4 10 77.33 18.21
 3 4 10 99.04 28.88
 3 -4 11 59.77 22.9
 3 4 11 80.37 21.93
 3 -4 11 83.91 18.97
 3 -4 11 101.77 19.36
 3 4 11 88 28.16
 3 -4 12 476.29 23.25
 3 4 12 501.21 26.9
 3 -4 12 590.33 25.26
 3 4 12 572.3 32.75
 3 -4 12 447.92 28.63
 3 -4 13 2.3 13.93
 3 4 13 -8.16 27.96
 3 -4 14 67.57 9.7
 3 4 14 71.33 17.84
 3 -4 14 69.71 16.25
 3 4 15 3.01 8.77
 3 -4 15 0.22 10.02
 -3 -5 17 61.96 8.43
 -3 -5 16 80.32 18.6
 -3 -5 16 27.42 11.55
 -3 -5 15 131.93 14.26
 -3 -5 15 152.41 22.98
 -3 -5 15 116.23 16.23
 -3 -5 14 7.87 23.96
 -3 -5 14 -2.24 17.05
 -3 -5 14 2.44 16.45
 -3 -5 14 8.99 16.08
 -3 -5 13 34.34 17.68
 -3 -5 13 78.68 17.84
 -3 -5 13 74.54 17.62
 -3 -5 13 69.16 14.64
 -3 -5 12 7.19 17.77
 -3 -5 12 14.58 17.8
 -3 -5 12 -1.47 15.1
 -3 -5 12 -2.73 17.18
 -3 -5 11 15.58 18.89
 -3 -5 10 183.74 19.99
 -3 -5 10 174.63 17.1
 -3 -5 10 204.68 18.2
 -3 -5 9 370.57 20.63
 -3 -5 9 374.27 18.11
 -3 -5 9 317.38 18.38
 -3 -5 8 168.24 15.78
 -3 5 8 163.9 12.89
 -3 -5 8 164.38 11.79
 -3 5 7 819.57 27.39
 -3 -5 7 794.98 27.98
 -3 -5 7 783.9 26.38
 -3 5 7 811.33 26.27
 -3 -5 6 340.44 15.85
 -3 5 6 326.58 15.27
 -3 -5 6 317.55 13.42
 -3 -5 5 28.9 15.34
 -3 5 5 23.25 9.34
 -3 -5 5 34.28 7.19
 -3 -5 5 26.12 6.32
 -3 -5 4 126.94 7.53
 -3 -5 4 123.45 8.26
 -3 -5 3 56.46 13.89
 3 -5 -3 57.34 11.57
 -3 -5 3 49.37 6.43
 3 -5 -2 111.38 12.28
 -3 -5 2 101.98 6.81
 -3 -5 2 104.14 13.04
 -3 -5 1 2.99 9.33
 3 5 -1 0.42 8.8
 3 5 -1 -0.97 6.54
 -3 5 1 5.9 3.62
 -3 -5 1 4.88 5.1
 -3 5 0 480.03 15.34
 3 5 0 435.37 18.35
 -3 -5 0 481.33 18.1
 3 5 1 6.73 9.21
 3 5 1 1.36 6.55
 3 -5 1 2.81 5.19
 3 5 2 576.49 23.96
 3 -5 2 628.15 19.83
 3 5 2 599.61 21.12
 3 5 3 76.18 10.62
 3 5 3 79.87 15.18
 3 -5 3 80.54 8.15
 3 5 4 112.27 12.26
 3 5 4 110.6 17.37
 3 -5 4 103.43 9.43
 3 5 5 245.23 16.68
 3 5 5 230.54 21.26
 3 -5 5 224.59 13.04
 3 5 6 -4.25 15.25
 3 -5 6 3 10.4
 3 -5 6 -3.28 13.01
 3 5 6 13.98 20.85
 3 5 7 9.16 19.07
 3 -5 7 7.37 15.62
 3 5 7 -18.95 25.28
 3 -5 7 18.34 12.87
 3 -5 8 86.56 16.4
 3 5 8 90.37 29.3
 3 -5 9 324 24.09
 3 -5 9 279.73 20.89
 3 -5 9 281.84 22.96
 3 5 10 -7.13 20.33
 3 -5 10 -8.04 19.82
 3 -5 10 -4.49 19.53
 3 -5 10 -6.8 17.22
 3 5 10 -0.1 26.02
 3 5 11 221.59 30.07
 3 -5 11 256.24 19.87
 3 -5 11 164.64 22.91
 3 5 11 245.26 25.01
 3 -5 12 17.33 13.07
 3 -5 12 -0.73 19.8
 3 -5 12 14.05 15.24
 3 5 12 18.87 23.48
 3 5 13 300.39 25.37
 3 -5 13 424.03 21.93
 3 -5 13 377.28 17.76
 3 -5 13 283.77 16.21
 3 -5 14 26.53 12.24
 3 5 14 12 12.79
 -3 -6 16 98.72 13.88
 -3 -6 15 -18.16 10.29
 -3 -6 15 66.13 11.15
 -3 -6 14 70.5 13.35
 -3 -6 14 87.42 23.13
 -3 -6 14 59.22 13.54
 -3 -6 14 74.35 14.31
 -3 -6 14 67.09 14.9
 -3 -6 13 8.24 14.03
 -3 -6 13 -12.1 13.55
 -3 -6 13 -21.55 16.65
 -3 -6 13 -1.54 16.35
 -3 -6 12 67.48 15.99
 -3 -6 12 63.9 17.84
 -3 -6 12 50.84 15.31
 -3 -6 12 63.29 17.8
 -3 -6 11 51.72 15.08
 -3 -6 11 60.42 18.62
 -3 -6 11 55.25 16.24
 -3 -6 10 64.13 16.07
 -3 -6 10 76.55 16.25
 -3 -6 9 169.93 17.95
 -3 -6 9 199.38 16.66
 -3 -6 8 166.58 16.46
 -3 -6 8 149.48 16.23
 -3 6 8 177.68 18.11
 -3 6 7 39.93 15
 -3 -6 7 27 11.47
 -3 -6 7 31.66 11.07
 -3 6 6 19.02 12.92
 -3 -6 6 18.51 10.17
 -3 -6 6 20.55 9.4
 -3 -6 5 3.44 7.91
 -3 6 5 6.81 12.13
 -3 -6 5 -5.7 7.63
 -3 -6 4 14.48 13.06
 -3 -6 4 11.93 7.69
 -3 -6 4 8.3 6.73
 -3 -6 3 24.7 7.08
 -3 -6 3 27.28 12.29
 -3 -6 2 11.3 6.43
 -3 -6 1 13.92 6.08
 -3 -6 0 56.69 6.4
 -3 -6 -1 122.23 7.59
 3 -6 1 121.65 7.96
 3 -6 2 179.6 10.05
 3 6 3 23.59 15
 3 -6 3 33.95 8.13
 3 6 4 107.9 19.35
 3 -6 4 123.1 10.94
 3 -6 5 11.69 10.79
 3 6 6 163.12 20.63
 3 6 6 187.75 26.56
 3 -6 6 151.18 13.72
 3 6 7 238.54 29.08
 3 -6 7 273.36 19.92
 3 -6 7 283.39 17.98
 3 -6 8 161.13 17.44
 3 -6 8 143.73 18.61
 3 6 8 159.19 27.57
 3 -6 8 158.02 15.59
 3 -6 9 123.68 19.9
 3 -6 9 125.05 18.7
 3 -6 9 80.75 16.95
 3 6 9 156.56 27.74
 3 -6 10 222.75 21.28
 3 6 10 282.59 28.83
 3 -6 10 165.28 19.89
 3 -6 10 110.28 20.38
 3 -6 11 7.98 15.21
 3 -6 11 2.56 14.14
 3 6 11 2.57 23.29
 3 -6 11 15.58 17.54
 3 -6 12 30.22 13.12
 3 -6 12 -1.36 16.87
 3 -6 13 7.01 12.52
 3 -6 13 7.02 6.45
 3 -6 13 18.43 9.72
 -3 -7 15 136.39 14.79
 -3 -7 14 137 13.14
 -3 -7 14 -10.33 12.19
 -3 -7 13 79.99 14.59
 -3 -7 13 75.17 13.22
 -3 -7 12 195.21 18.72
 -3 -7 12 -20.88 15.66
 -3 -7 11 55.93 17.43
 -3 -7 11 76.76 16.55
 -3 -7 10 18.66 14.32
 -3 -7 10 29.28 16.33
 -3 -7 9 56.93 14.61
 -3 -7 9 60.4 14.76
 -3 -7 8 122.77 16.38
 -3 -7 8 123.39 15.72
 -3 7 7 39.21 18.91
 -3 -7 7 28.68 14.62
 -3 -7 7 27.13 14.43
 -3 7 6 92.07 18.08
 -3 -7 6 110.81 13.45
 -3 -7 6 58.22 13.24
 -3 7 5 61.64 16.88
 -3 -7 5 86.31 10.35
 -3 -7 4 114.09 9.7
 -3 -7 3 10.24 8.25
 -3 -7 2 133.2 9.36
 -3 -7 2 113.7 9.33
 -3 -7 1 59.43 8.33
 -3 -7 0 133.15 8.81
 -3 -7 -1 82.89 7.99
 3 -7 1 81.22 8.51
 -3 -7 -2 166 9.88
 3 -7 2 183.51 11.07
 -3 -7 -3 65.74 7.67
 3 -7 3 69.63 10.21
 -3 -7 -4 49.3 7.53
 3 -7 4 45.08 10.7
 -3 -7 -5 60.35 7.88
 3 -7 5 63.57 12.29
 3 7 6 109.44 21.64
 3 -7 6 95.35 12.22
 3 7 7 214.81 24.08
 3 -7 7 233.15 17.13
 3 -7 7 190.26 14.67
 3 -7 8 70.23 16.65
 3 7 8 64.2 22.09
 3 -7 8 78.22 15.12
 3 -7 8 63.24 13.8
 3 -7 9 514.35 25.57
 3 -7 9 273.89 23.56
 3 -7 10 -6.35 15.3
 3 -7 10 13.09 13.72
 3 -7 10 -11.76 15.85
 3 -7 11 151.11 16.34
 3 -7 11 161.82 14.38
 3 -7 12 8.71 11.86
 3 -7 12 -12.04 7.5
 3 -7 12 1.1 9.93
 3 -7 13 16.83 6.95
 -3 -8 15 8.71 7.97
 -3 -8 14 38.81 13.52
 -3 -8 13 45.24 12.51
 -3 -8 13 55.07 11.89
 -3 -8 12 28.82 13.26
 -3 -8 12 34.77 13.33
 -3 -8 11 206.81 17.22
 -3 -8 11 196.87 16.18
 -3 -8 11 171.69 16.13
 -3 -8 10 6.85 14.69
 -3 -8 10 2.32 15.42
 -3 -8 10 2.82 14.93
 -3 -8 9 347.69 20.53
 -3 -8 9 433.53 20.65
 -3 -8 8 4.89 13.69
 -3 -8 8 14.07 14.07
 -3 8 7 82.29 19.19
 -3 -8 7 63.49 14.1
 -3 -8 7 72.74 14
 -3 8 6 0.28 21.2
 -3 -8 6 32.32 12.88
 -3 8 5 88.81 21.3
 -3 -8 5 154.99 13.26
 -3 -8 4 2.53 10.99
 -3 -8 3 73.11 10.33
 -3 -8 3 76.91 11.64
 -3 -8 2 4.22 9.14
 -3 -8 2 3.39 9.81
 -3 -8 1 213.56 12.29
 -3 -8 1 239.26 12.86
 -3 -8 0 1.49 9.41
 -3 -8 0 1.61 8.74
 -3 -8 -1 387.61 15.73
 -3 -8 -2 4.29 7.76
 3 -8 2 10.07 9.41
 3 -8 3 162.25 11.89
 -3 -8 -3 160.35 9.96
 3 -8 4 24.97 11.12
 -3 -8 -4 28.41 7.13
 3 -8 5 32.62 10.9
 -3 -8 -5 31.8 6.95
 3 -8 6 29.45 11.14
 3 -8 7 59.14 14.19
 3 -8 7 52.74 12.07
 3 -8 8 13.19 14.18
 3 -8 8 16.09 13.69
 3 -8 9 45.84 14.36
 3 -8 9 36.26 12.62
 3 -8 9 33.06 14.28
 3 -8 10 34.65 13.28
 3 -8 10 35.77 11.94
 3 -8 10 41.52 13.66
 3 -8 11 18.01 7.55
 3 -8 11 36.09 9.45
 3 -8 11 17.54 10.64
 3 -8 12 11.1 6.3
 -3 -9 13 6.21 11.09
 -3 -9 13 0.54 7.35
 -3 -9 12 8.6 10.07
 -3 -9 12 9.6 9.78
 -3 -9 11 -6.23 11.34
 -3 -9 10 80.5 13.44
 -3 -9 10 53.14 14.01
 -3 -9 10 78.17 12.99
 -3 -9 9 24.61 13.23
 -3 -9 9 15.05 13.09
 -3 -9 8 26.94 13.14
 -3 -9 8 27.17 13.97
 -3 9 7 30.79 18.76
 -3 -9 7 10.83 12.05
 -3 9 6 158.41 21.36
 -3 -9 6 177.59 14.33
 -3 -9 5 16.8 13.32
 -3 9 5 24.23 21.52
 -3 -9 5 20.59 11.71
 -3 -9 4 176.39 14.93
 -3 -9 4 173.29 12.46
 -3 -9 3 0.04 10.17
 -3 -9 3 17.07 11.38
 -3 -9 2 477.98 17.76
 -3 -9 2 391.07 18.59
 -3 -9 1 -2.17 8.02
 -3 -9 1 -3.18 10.24
 -3 -9 0 531.79 19.61
 -3 -9 0 502.51 18.6
 -3 -9 -1 42.02 8.09
 -3 -9 -1 51.52 9.89
 -3 -9 -2 628.97 21.63
 3 -9 2 622.3 21.94
 -3 -9 -2 685.49 23.24
 3 -9 3 2.14 8.71
 -3 -9 -3 0.05 8.75
 3 -9 4 324.11 14.95
 3 -9 5 2.92 9.36
 3 -9 6 150.51 14.45
 3 -9 6 137.44 12.31
 3 -9 7 -3.47 12.64
 -3 -9 -7 -1.52 6.86
 3 -9 7 5.57 11.82
 3 -9 8 104.36 12.51
 3 -9 8 139.4 12.94
 3 -9 9 -7.34 10.74
 3 -9 9 20.42 10.75
 3 -9 10 38.99 6.65
 3 -9 10 72.51 8.48
 3 -9 11 -1.64 5.33
 -3 -10 12 9.56 6.09
 -3 -10 11 33.91 7.64
 -3 -10 11 29.22 8.37
 -3 -10 11 32.65 7.87
 -3 -10 10 17 10.28
 -3 -10 10 45.13 10.77
 -3 -10 10 17.15 9.13
 -3 -10 9 232.5 16.6
 -3 -10 9 175.6 13.24
 -3 -10 8 32.5 10.77
 -3 -10 7 154.18 12.09
 -3 10 6 27.85 18.22
 -3 -10 6 33.76 12.43
 -3 -10 6 35.86 11.14
 -3 10 5 85.22 19.64
 -3 -10 5 114.33 11.59
 -3 -10 5 81.62 13.17
 -3 -10 4 74.14 13.56
 -3 -10 4 71.03 10.35
 -3 -10 3 -18.98 13.96
 -3 -10 3 44.55 9.78
 -3 -10 2 1.2 8.35
 -3 10 2 5.18 19.23
 -3 -10 2 3.05 11.42
 -3 -10 1 10.63 10.83
 -3 -10 1 14.07 8.03
 -3 10 1 18.45 17.94
 -3 -10 0 15.18 9.82
 -3 10 -1 100.31 16.39
 -3 -10 -1 95.36 10.95
 -3 10 -2 -8.39 13.8
 -3 -10 -2 -2.78 8.75
 -3 10 -3 146.76 12.82
 -3 -10 -3 121.72 10.49
 -3 10 -4 10.91 9.64
 3 -10 4 -1.69 8.28
 -3 -10 -4 9.8 8.07
 -3 10 -5 16.85 7.34
 3 -10 5 18.19 8.28
 -3 -10 -5 18.37 7.45
 3 -10 6 9.96 11.15
 3 -10 7 87.12 10.98
 3 -10 8 50.17 8.71
 3 -10 8 47.41 8.77
 3 -10 9 24.12 6.52
 -3 -11 9 22.24 7.4
 -3 -11 9 18.42 5.33
 -3 -11 8 1.6 8.88
 -3 -11 8 6.98 6.9
 -3 -11 7 59.19 8.52
 -3 -11 6 -5.58 10.02
 -3 -11 6 1.48 7.78
 -3 -11 5 122.1 12.37
 -3 11 5 69.85 16.96
 -3 -11 4 6.25 9.91
 -3 -11 3 16.16 10.01
 -3 -11 2 19.25 10.08
 -3 11 2 4.84 16.7
 -3 11 1 4.34 14.58
 -3 -11 1 3.07 9.91
 -3 11 0 47.17 14.58
 -3 -11 0 37.72 9.63
 -3 11 -1 19.13 12.44
 -3 -11 -1 22.59 8.76
 -3 11 -2 26.94 11.05
 3 11 2 31.61 10.21
 -3 -11 -2 34.79 8.27
 -3 -11 -3 -0.84 7.18
 -3 11 -4 130.18 9.37
 3 -11 5 14.42 8.33
 3 -11 6 -1.52 7.31
 3 -11 7 18.6 5.2
 3 -11 7 46.39 6.02
 -3 -12 7 5.39 4.88
 -3 -12 7 5.98 5.57
 -3 -12 6 0.48 6.67
 -3 -12 5 6.14 7.1
 -3 -12 4 -5.92 7.32
 -3 -12 3 -2.54 7.21
 -3 12 2 -3.14 11.46
 -3 -12 2 0.26 7.11
 -3 -12 1 29.5 7.24
 -3 12 1 21.74 11.11
 -3 12 0 28.37 10.34
 3 12 0 4.99 8.86
 -3 -12 0 19.27 6.72
 -3 12 -1 2.42 8.61
 3 12 1 -10.49 7.14
 -3 -12 -1 -0.1 5.73
 -3 12 -2 8.24 6.99
 -3 12 -3 2.86 4.94
 3 -12 3 4 5.33
 -4 0 18 107.58 14.35
 -4 0 16 44.49 20.84
 -4 0 15 -11.56 23.28
 -4 0 14 194.9 26.9
 -4 0 13 -1.78 25.14
 -4 0 12 1.06 21.62
 -4 0 11 7.96 19.81
 -4 0 10 14.2 15.82
 -4 0 9 1.49 10.63
 -4 0 9 -1.79 12.27
 -4 0 8 255.21 12.81
 -4 0 8 268.89 14.42
 -4 0 8 265.22 12.36
 4 0 -8 239.34 19.18
 4 0 -7 0.31 11.45
 -4 0 7 -0.62 9.03
 -4 0 7 2.05 6.45
 4 0 -7 -0.03 3.57
 -4 0 7 5.54 7.74
 -4 0 6 702.15 23.88
 -4 0 6 844.83 29.56
 4 0 -6 853.79 24.02
 4 0 -6 757.92 31.12
 -4 0 5 0.47 11.44
 -4 0 5 2.77 5.98
 4 0 -5 -2.93 10.56
 4 0 -5 -0.63 3.71
 -4 0 4 333.98 21.73
 4 0 -4 406.26 18.57
 4 0 -3 4.47 9.15
 4 0 -3 -2.34 4.82
 4 0 -2 433 17.8
 4 0 -2 458.36 14.55
 4 0 -1 1.3 7.42
 -4 0 1 3.7 5.2
 4 0 -1 -0.18 3.69
 -4 0 0 2216.25 68.42
 4 0 0 2811.35 74.28
 4 0 1 2.97 12.36
 -4 0 -1 2.8 6.23
 -4 0 -1 -2.96 5.4
 -4 0 -2 99.57 7.6
 -4 0 -2 96.87 8.3
 4 0 3 -2.28 5.62
 4 0 3 2.13 8.65
 4 0 3 -1.11 12.17
 -4 0 -3 1.01 6.17
 4 0 3 0.5 9.99
 -4 0 -4 164.51 10.39
 4 0 4 190.17 9.82
 4 0 4 174.36 13.35
 4 0 4 194.11 8.38
 4 0 5 -0.14 12.89
 4 0 5 0.36 8.44
 -4 0 -5 0.49 5.88
 4 0 5 -1.38 11.52
 4 0 6 390.37 20.56
 4 0 6 424.4 17.48
 4 0 7 -0.37 12.23
 4 0 7 4.09 18.92
 4 0 8 363.04 19.65
 4 0 8 394.11 27.25
 4 0 10 428.49 30.74
 4 0 10 435.92 25.19
 4 0 11 -7.08 19.4
 4 0 11 -7.21 27.28
 4 0 12 284.74 21.2
 4 0 12 306.12 29.04
 4 0 14 148.51 13.32
 4 0 15 2.78 6.62
 -4 1 18 26.4 12.08
 -4 -1 18 15.94 12.99
 -4 1 17 554.75 26.83
 -4 -1 17 9.24 18.8
 -4 1 16 261.73 22.88
 -4 -1 16 268.88 23.96
 -4 1 15 97.59 23.24
 -4 -1 15 60.78 24.57
 -4 1 14 29.15 23.5
 -4 -1 14 9.22 24.27
 -4 -1 13 -30.83 27.19
 -4 1 13 325.31 27.19
 -4 -1 12 8.42 18.31
 -4 1 12 0.69 22.08
 -4 -1 12 37.3 21.93
 -4 -1 12 26.57 14.18
 -4 -1 11 203.08 21.07
 -4 -1 11 132.53 13.62
 -4 1 11 193.41 21.4
 -4 1 10 37.84 14.1
 -4 1 10 37.66 15.99
 -4 -1 10 43.94 10.06
 -4 -1 9 160.47 10.4
 -4 1 9 164.88 14.71
 -4 -1 9 134.7 11.96
 -4 1 9 152.73 12.64
 -4 -1 8 35.86 8.91
 -4 1 8 31.77 9.28
 -4 -1 8 30.61 5.33
 -4 1 8 26.04 10.82
 -4 -1 8 37.63 7.41
 4 1 -8 42.62 14.99
 -4 -1 7 33.67 8.26
 -4 1 7 55.39 8.5
 4 1 -7 9.15 13.83
 -4 1 7 35 10.23
 -4 1 7 31.8 7.82
 -4 -1 7 30.28 6.64
 -4 -1 7 20.12 7.36
 -4 1 6 607.97 20.23
 -4 -1 6 593.42 20.93
 -4 -1 6 612.02 19.91
 -4 1 6 689.09 24.51
 4 1 -6 652.91 29.44
 -4 -1 6 699.01 26.52
 4 -1 -6 669.98 27.42
 4 1 -5 8.67 11.77
 4 -1 -5 7.82 9.51
 4 1 -5 9.37 4.61
 -4 1 5 11.1 9.2
 -4 1 4 506.3 23.34
 4 -1 -4 436.18 20.06
 4 1 -4 452.58 16.02
 4 1 -4 455.88 22.86
 -4 1 3 27.36 13.6
 4 1 -3 25.98 11.19
 4 -1 -3 27.25 9.06
 4 -1 -3 11.17 1.65
 4 1 -3 24.09 5.95
 4 1 -3 21.4 5.14
 -4 1 2 455.3 15.8
 4 1 -2 476.5 16.5
 4 1 -2 508.77 20.34
 4 1 -1 427.47 15.06
 -4 1 1 405.24 15.03
 4 1 -1 457.25 17.46
 4 -1 0 32.64 11.57
 4 1 0 37.93 5.71
 -4 -1 0 35.81 6.4
 4 1 0 48.67 6.5
 -4 -1 -1 922.4 30.43
 -4 1 -1 929.78 28.37
 -4 -1 -1 921.29 30.69
 4 1 1 945.51 29.67
 4 -1 1 1014.2 34.05
 4 -1 2 135.47 13.38
 -4 -1 -2 116 9.32
 -4 1 -2 115.37 7.64
 4 1 2 109.38 11.23
 -4 -1 -2 117.36 8.91
 4 1 3 1568.67 45.02
 -4 -1 -3 1564.14 47.56
 4 1 3 1571.27 46.47
 -4 1 -3 1491.39 45.99
 4 -1 3 1498.51 45.52
 -4 -1 -3 1545.27 48.17
 4 -1 4 54.75 12.94
 4 1 4 55.08 9.28
 4 -1 4 60.83 10.52
 4 -1 4 58.75 7.23
 -4 -1 -4 52.07 7.63
 -4 1 -4 39.08 6.46
 4 1 4 48.93 12.43
 4 -1 4 55.2 10.82
 4 1 5 1746.04 49.28
 4 1 5 1699.95 50.83
 -4 -1 -5 1594.68 52.03
 4 -1 5 1712.67 48.17
 4 -1 5 1632.45 49.79
 4 1 6 42.12 11.71
 4 -1 6 35.35 10.47
 4 -1 6 36.29 14.6
 4 1 6 23.42 16.76
 4 1 7 1113.35 39.93
 4 -1 7 1084.88 35.07
 4 -1 7 1073.98 38.59
 4 1 8 341.76 27.82
 4 -1 8 339.69 19.07
 4 -1 8 355.94 26.22
 4 -1 9 190.05 23.25
 4 1 9 113.41 28.6
 4 1 10 62.81 20.67
 4 -1 10 84.01 20.32
 4 -1 10 60.62 17.33
 4 1 10 67.01 28.2
 4 -1 10 75.01 25.46
 4 1 11 262.03 23.02
 4 -1 11 309.22 22.89
 4 -1 11 256.89 28.41
 4 1 12 33.11 18.16
 4 -1 12 25.72 24.03
 4 -1 12 34.07 17.05
 4 -1 13 74.48 18.3
 4 -1 13 341.36 27.09
 4 1 14 -2.5 11.47
 4 -1 14 -10.64 11.28
 4 -1 14 17.92 16.25
 4 1 15 25.42 6.93
 4 1 15 23 10.35
 4 -1 15 11.75 10.28
 -4 -2 18 -12.9 11.59
 -4 2 17 244.83 19.87
 -4 2 16 21.53 18.11
 -4 2 15 34.16 20.2
 -4 -2 15 6.37 19.75
 -4 -2 14 -4.52 18.44
 -4 2 14 143.16 22.19
 -4 -2 13 148.13 20.11
 -4 -2 13 256.1 20.23
 -4 2 12 -15.1 22.85
 -4 -2 11 541.56 22.95
 -4 2 11 552.93 27.12
 -4 -2 11 535.24 27.76
 -4 2 10 15.91 14.24
 -4 -2 10 17.08 16.79
 -4 2 10 16.16 15.66
 -4 -2 10 24.47 11.31
 -4 -2 9 665.42 25.83
 -4 2 9 745.33 26.12
 -4 -2 9 747.68 24.08
 -4 -2 9 624.35 24.27
 -4 2 9 692.33 24.74
 -4 -2 8 41.98 9.37
 -4 2 8 42.14 9.4
 4 -2 -8 33.37 12.4
 -4 -2 8 39.35 15.54
 -4 -2 8 42.67 11.48
 -4 2 8 58.29 11.27
 4 -2 -8 35.87 7.39
 -4 -2 8 43.88 7.84
 -4 -2 7 85.87 8.68
 -4 -2 7 82.64 15.21
 -4 -2 7 91.11 10.58
 -4 2 7 120.33 11.13
 -4 2 7 147.18 10.19
 4 -2 -7 58.38 7.5
 -4 -2 7 113.41 8.14
 -4 -2 7 75.55 9.33
 -4 -2 6 267.37 11.26
 -4 2 6 290.73 12.28
 -4 -2 6 302.91 19.71
 -4 -2 6 280.14 12.95
 4 -2 -6 282.63 11.52
 -4 -2 6 293.28 11.02
 -4 -2 5 1913.29 59.6
 -4 2 5 1815.48 53.8
 4 -2 -5 1925.75 60.28
 -4 -2 5 1977.85 53.57
 4 -2 -5 1786.09 53.31
 -4 2 5 2069.96 59.11
 -4 2 4 122.07 8.8
 -4 -2 4 96.23 11.53
 -4 2 4 111.23 10.99
 4 2 -4 100.65 7.31
 4 2 -3 1309.28 40.5
 4 2 -3 1310.37 39.78
 4 2 -2 493.43 18.04
 -4 2 2 464.08 15.45
 4 2 -2 468.95 17.33
 4 2 -1 301.24 13
 4 -2 -1 275.65 15.56
 4 2 0 365.99 21.55
 -4 2 0 358.36 18.99
 4 2 0 337.25 14.35
 4 -2 0 313.71 16.34
 -4 2 -1 715.91 25.23
 -4 -2 -1 550.22 19.49
 -4 2 -1 444.74 15.59
 4 2 1 545.26 19.44
 4 2 1 525.42 18.85
 4 -2 1 601.71 22.44
 4 2 1 686.12 28.33
 4 2 2 15.6 6.84
 -4 2 -2 28.44 10.76
 4 2 2 26.63 14.17
 4 -2 2 17.48 9.49
 -4 -2 -2 18.83 6.62
 -4 -2 -2 20.26 7.62
 -4 2 -2 16.81 4.53
 4 2 2 4.08 10.93
 4 2 2 21.99 7.36
 4 2 3 120.08 9.35
 4 2 3 157.19 17.22
 -4 -2 -3 135.58 10.4
 4 2 3 122.22 13.14
 -4 2 -3 112.87 7.46
 4 -2 3 127.44 7.73
 4 -2 3 120.93 9.88
 -4 2 -3 147.38 12.69
 4 2 4 513.86 18.33
 -4 -2 -4 477.86 20.23
 -4 -2 -4 474.49 20.46
 4 2 4 504.29 21.27
 4 -2 4 510.37 17.13
 -4 2 -4 449.62 17.82
 4 -2 4 483.78 19.02
 -4 2 -4 543.3 21.8
 4 2 5 69.58 10.87
 4 -2 5 75.8 9.92
 4 2 5 60.6 15.86
 4 -2 5 62.74 12.4
 4 2 6 765.63 26.82
 4 2 6 712.67 29.97
 4 -2 6 749.47 24.97
 4 -2 6 663.58 26.82
 4 2 7 46.86 16.21
 4 -2 7 43.36 12.85
 4 2 7 43.06 20.94
 4 -2 7 36.95 17.36
 4 -2 8 245.58 24.84
 4 2 8 218.21 28.87
 4 -2 8 203.87 16.24
 4 -2 8 199.73 22.98
 4 -2 9 104.74 19.81
 4 -2 9 934.75 31.87
 4 2 10 6.44 20.12
 4 -2 10 0.14 18.62
 4 -2 10 6.73 16.39
 4 -2 10 1.06 22.82
 4 2 11 -32.11 21.17
 4 -2 11 3.3 18.47
 4 -2 11 -23.12 23.73
 4 -2 11 -21 17.95
 4 2 12 89.42 18.83
 4 -2 12 111.51 17.03
 4 -2 12 113.96 23.78
 4 -2 13 89.42 17.83
 4 2 13 91.32 16.27
 4 2 14 49.3 12.12
 4 -2 14 46.03 10.25
 4 2 14 55.31 16.78
 4 -2 14 27.75 14.87
 4 2 15 -1.57 9.04
 4 -2 15 0.53 8.59
 -4 -3 18 62.19 10.04
 -4 -3 17 -13.46 14.47
 -4 -3 16 -16.19 19.44
 -4 3 15 16.05 16.57
 -4 -3 15 10.67 21.45
 -4 -3 15 15.69 21.01
 -4 -3 14 34.46 21.04
 -4 3 14 81.23 18.72
 -4 -3 14 64.39 23.92
 -4 -3 14 64.29 16.07
 -4 3 13 82.9 20.29
 -4 -3 13 20.04 21.31
 -4 -3 13 45.27 16.8
 -4 3 12 773.83 32.12
 -4 -3 12 818.29 35.56
 -4 -3 12 805.77 30.53
 -4 3 11 9.39 17.62
 -4 -3 11 5.12 20.74
 -4 -3 11 2.06 10.25
 -4 3 10 651.64 25.37
 -4 -3 10 577.81 26.46
 -4 -3 10 621.4 22.74
 -4 3 10 563.66 23.72
 -4 3 9 73.94 13.04
 -4 -3 9 75.02 15.6
 -4 3 9 81.76 14.46
 -4 -3 9 74.62 9.21
 -4 -3 9 75.98 11.11
 -4 3 8 508.77 19.69
 -4 -3 8 498.8 20.87
 -4 3 8 568.96 21.11
 -4 -3 8 546.51 18.71
 -4 -3 8 520.77 19.1
 -4 3 7 22.79 9.29
 -4 -3 7 13.79 6.83
 4 -3 -7 2.46 12.39
 -4 -3 7 7.63 10.35
 -4 3 7 22.78 10.12
 -4 -3 7 -1.08 13.05
 -4 -3 7 8.11 7.29
 -4 -3 7 20.55 8.4
 -4 3 6 720.74 23.28
 -4 -3 6 671.25 23.45
 -4 3 6 770.3 23.78
 -4 -3 6 734.2 31.27
 -4 -3 6 717.64 22.24
 4 -3 -6 646.06 22.52
 -4 -3 6 753.14 22.46
 -4 -3 6 730.22 22.65
 -4 3 5 256.88 10.98
 -4 3 5 285.17 12.17
 -4 3 5 318.53 15.52
 -4 -3 5 269.27 11.9
 -4 -3 5 292.21 10.27
 -4 -3 5 291.16 11.11
 -4 -3 5 281.52 17.68
 -4 3 4 3280.19 90.36
 -4 -3 4 3151.7 94.83
 -4 3 4 3108.49 89.31
 4 3 -4 3173.05 92.24
 -4 -3 4 3190.19 89.56
 -4 3 3 9.23 9.29
 -4 3 3 0.79 5.82
 -4 -3 3 0.8 8.33
 4 3 -3 -2.82 5.97
 4 3 -3 3.32 8.07
 -4 -3 3 0.63 4.57
 -4 -3 2 1999.48 59.93
 -4 3 2 1935.34 57.41
 4 3 -2 2257.44 62.09
 -4 3 2 2269.92 63.59
 4 3 -2 2067.17 60.84
 -4 3 2 2103.98 59.9
 4 -3 -1 256.22 13.76
 -4 3 1 295.59 15.22
 4 3 -1 244.56 13.34
 4 3 -1 310.88 14.63
 4 3 -1 256.72 12.91
 4 3 -1 282.59 20.57
 4 -3 0 1952.71 57.1
 -4 3 0 1889.15 58.52
 4 3 0 1990.12 57.43
 4 3 0 1947.96 64.21
 -4 3 -1 24.92 8.63
 4 3 1 22.37 6.23
 4 3 1 22.12 13.95
 4 -3 1 26.77 8.46
 4 3 1 26.69 11.01
 4 3 1 22.52 7.72
 4 3 2 974.94 28.25
 4 3 2 1111.88 41.84
 -4 3 -2 1139.92 33.49
 4 3 2 995.95 31.12
 -4 3 -2 790.95 27.35
 4 3 2 1178.62 33.72
 4 -3 2 898.8 27.73
 -4 3 -3 110.32 9.99
 4 3 3 118.34 17.52
 -4 -3 -3 115.53 10.27
 4 3 3 120.34 13.98
 4 3 3 117.61 9.73
 4 -3 3 119.85 7.97
 4 -3 3 113.07 10.36
 4 -3 3 108.42 8.16
 4 3 3 129.68 11.21
 4 3 4 203.43 12.09
 4 3 4 192.61 16.26
 4 -3 4 209.44 10.9
 4 -3 4 206.71 13.14
 4 3 5 118.15 13.02
 4 -3 5 117.99 10.88
 4 -3 5 117.2 13.34
 4 3 5 116.32 18.92
 4 -3 6 47.68 15
 4 3 6 53.25 14.95
 4 -3 6 47.1 11.91
 4 3 6 45.76 19.9
 4 3 7 44.35 18.15
 4 -3 7 22.77 13.7
 4 -3 7 20.52 17.37
 4 3 8 -19.12 20.84
 4 -3 8 16.69 22.7
 4 -3 8 16 15.04
 4 -3 8 6.65 18.49
 4 -3 9 47.87 22.22
 4 -3 9 41.49 15.28
 4 -3 9 30.23 20.63
 4 -3 10 72.72 19.73
 4 -3 10 72.15 21.91
 4 -3 10 29.04 15.76
 4 -3 11 101.08 18.53
 4 -3 11 160.07 25.43
 4 3 11 104.14 28.6
 4 3 11 116.92 21.29
 4 3 12 10.9 17.41
 4 -3 12 1.89 16.32
 4 -3 12 22.62 14.98
 4 3 12 26.6 24.49
 4 -3 12 17.19 20.43
 4 -3 13 -24.45 13.27
 4 3 13 241.5 23.38
 4 -3 14 34.39 8.45
 4 3 14 28.45 14.31
 4 -3 14 37.46 13.12
 -4 -4 18 23.6 7.03
 -4 -4 17 56.22 12.28
 -4 -4 16 4.31 19.22
 -4 -4 16 35.46 16.41
 -4 -4 15 63.72 21.52
 -4 -4 15 62.1 18.49
 -4 -4 14 13.87 22.72
 -4 -4 14 -55.77 27.59
 -4 -4 14 -18.19 17.46
 -4 -4 13 26.66 20.73
 -4 -4 13 13.35 16.89
 -4 -4 13 35.25 12.98
 -4 -4 12 12.6 18.8
 -4 -4 12 28.33 15.78
 -4 -4 12 28.45 13.89
 -4 -4 12 25.37 16.3
 -4 -4 11 354.01 23.81
 -4 -4 11 385.17 20.07
 -4 4 10 57.61 17.05
 -4 -4 10 47.69 17.99
 -4 -4 10 40.43 14.59
 -4 -4 10 98.6 15.61
 -4 -4 10 63.44 12.53
 -4 -4 9 689.14 26.49
 -4 -4 9 644.64 22.36
 -4 -4 9 657.46 23.76
 -4 4 9 688.6 24.28
 -4 4 8 5.17 11.57
 -4 -4 8 -0.76 9.46
 -4 -4 8 1.57 12.83
 -4 -4 8 -2.72 8.71
 -4 4 7 553.99 20.11
 -4 -4 7 468.27 20.26
 -4 -4 7 531.27 18.62
 -4 -4 7 484.78 18.58
 -4 4 6 1162.04 34.91
 -4 -4 6 1185.92 45.09
 -4 -4 6 1097.34 35.2
 -4 -4 6 1199.01 34.39
 -4 -4 6 1117.56 34.39
 -4 4 5 440.14 16.7
 -4 -4 5 482.93 24.22
 -4 -4 5 445.03 15.21
 -4 -4 5 458.27 15.82
 -4 -4 5 426.9 16.55
 -4 -4 4 438.32 20.77
 -4 4 4 399.75 15.63
 -4 4 4 384.55 14.73
 -4 -4 4 381.56 14.47
 4 4 -4 435.82 19.76
 4 4 -4 391.34 16.51
 -4 -4 4 360.17 13.81
 -4 -4 3 394.64 18.41
 -4 4 3 372.61 14.36
 -4 4 3 392.6 16.37
 4 4 -3 460.93 19.85
 -4 4 3 437.03 19.18
 4 4 -3 422.37 17.3
 -4 4 2 158.5 8.7
 -4 4 2 214.12 13
 -4 -4 2 174.93 11.3
 4 4 -2 218.75 13.25
 4 4 -2 163.83 10.59
 4 4 -2 187.89 17.5
 4 -4 -2 158.02 10.14
 -4 4 2 153.33 12.38
 -4 4 1 185.86 14.69
 -4 -4 1 285.7 11.8
 -4 4 1 278.16 11.29
 -4 4 1 354.69 16.19
 4 -4 -1 334.9 13.56
 4 4 -1 381.27 16.89
 4 4 -1 320.71 14.8
 4 4 -1 269.78 20.8
 4 4 0 112.84 7.74
 -4 4 0 121.22 7.6
 4 -4 0 168.79 9.65
 -4 4 0 138.08 10.58
 4 4 0 123.97 12
 4 4 0 173.51 12.12
 -4 4 -1 246.4 9.71
 4 4 1 249.46 10.99
 4 4 1 278.37 15.28
 4 4 1 321.92 15.8
 4 -4 1 239.28 9.61
 -4 4 -1 304.42 14.21
 4 4 2 251.89 11.81
 4 4 2 251.43 15.97
 4 -4 2 244.07 10.41
 -4 4 -2 283.44 13.48
 4 4 3 85.8 9.96
 4 -4 3 80.18 8.2
 4 4 3 88.13 15.43
 4 4 4 299.38 15.31
 4 4 4 282.02 19.59
 4 -4 4 293.73 13.25
 4 -4 4 295.38 15.73
 4 -4 4 272.46 12.89
 4 4 5 26.44 13.55
 4 -4 5 30.46 13.28
 4 -4 5 32.22 10.82
 4 -4 5 21.35 10.01
 4 -4 6 49.24 15.99
 4 4 6 56.42 16.23
 4 -4 6 56.49 12.4
 4 4 7 11.55 18.83
 4 -4 7 5.43 13.06
 4 -4 7 -2.39 17.02
 4 -4 8 53.83 18.78
 4 4 8 54.49 20.87
 4 -4 8 14.06 22.57
 4 -4 9 93.49 22.75
 4 -4 9 78.13 19.27
 4 -4 9 85.33 15.47
 4 4 9 126.03 28.93
 4 -4 10 32.99 19.65
 4 -4 10 8.97 15.51
 4 4 10 25.09 26.78
 4 -4 10 33.04 20.22
 4 -4 11 29.39 20.08
 4 -4 11 37.61 17.11
 4 -4 11 43.8 15.12
 4 4 11 25.38 25.4
 4 -4 12 -3.24 18.47
 4 -4 12 2.01 14.98
 4 -4 12 -14.94 14.91
 4 -4 13 5.68 14.87
 4 4 13 9.52 17.45
 4 4 14 8.04 11.15
 4 -4 14 15.09 9.93
 -4 -5 17 46.31 8.28
 -4 -5 16 -15.48 15.52
 -4 -5 16 34.55 12.05
 -4 -5 15 37.35 20.21
 -4 -5 15 35.74 15.18
 -4 -5 14 44.25 16.58
 -4 -5 14 43.07 12.97
 -4 -5 14 46.02 16.3
 -4 -5 13 15.07 17.7
 -4 -5 13 -5.4 13.91
 -4 -5 13 -12.21 13.1
 -4 -5 13 0.07 16.68
 -4 -5 12 10.31 14.08
 -4 -5 12 5.3 17.88
 -4 -5 12 1.61 17.41
 -4 -5 11 153.06 20.36
 -4 -5 11 95.14 17.67
 -4 -5 11 159.22 19.21
 -4 -5 11 93.76 16.19
 -4 -5 10 24.12 16.95
 -4 -5 10 17 18.11
 -4 -5 10 -29.31 18.49
 -4 -5 10 20.33 14.03
 -4 -5 9 170.24 17.13
 -4 -5 9 165.67 14.81
 -4 -5 9 127.38 16.27
 -4 5 9 173.48 15.9
 -4 5 8 19.82 12.14
 -4 -5 8 11.66 14.39
 -4 -5 8 8.16 10.55
 -4 -5 8 7.32 11.88
 -4 -5 7 36.39 9.24
 -4 5 7 33.47 11.02
 -4 5 7 25.76 11.75
 -4 -5 7 38.63 12.76
 -4 -5 7 34.13 9.65
 -4 5 6 172.95 11.73
 -4 -5 6 167.27 13.11
 -4 -5 6 162.48 10.02
 -4 5 5 126.63 10.49
 -4 -5 5 96.58 14.66
 -4 -5 5 113.47 8.23
 -4 -5 4 168.61 9.02
 -4 5 4 173.4 10.88
 -4 5 4 156.36 11.84
 -4 -5 4 161.76 14.78
 -4 5 3 10.57 8.76
 -4 -5 3 4.26 9.21
 -4 5 3 4.32 8.51
 4 5 -3 12.36 11.24
 4 5 -3 11.93 9.35
 -4 -5 3 3.59 6.21
 -4 5 2 278.35 16.35
 -4 5 2 430.52 15.77
 4 5 -2 350.36 22.44
 4 5 -2 577.57 23.37
 4 5 -2 444.11 19.02
 -4 -5 2 448.75 14.73
 -4 -5 1 170.85 8.06
 -4 5 1 159.63 9.68
 4 5 -1 202.69 14.05
 4 5 -1 69.5 12.67
 -4 5 1 5.48 9.13
 4 5 0 101.15 13.2
 -4 5 0 53.29 11.07
 4 5 1 98.38 15.51
 4 5 1 759.71 19.71
 4 5 2 451.11 17.4
 4 -5 2 420.36 15.4
 4 5 3 378.43 16.82
 4 -5 3 343.47 14.24
 4 5 4 20.41 11.58
 4 -5 4 21.29 9.33
 4 5 5 311.89 18.64
 4 -5 5 304.52 15.43
 4 -5 5 316.87 17.43
 4 -5 5 271.72 15.06
 4 -5 6 11.35 15.28
 4 5 6 -5.42 15.89
 4 -5 6 0.04 13.28
 4 5 7 289.59 22.62
 4 -5 7 314.38 17.87
 4 -5 7 300.31 20.32
 4 5 8 21.94 20.28
 4 -5 8 20.75 16.99
 4 -5 8 33.28 20.38
 4 -5 8 24.3 14.45
 4 5 8 21.37 27.09
 4 5 9 318.15 23.22
 4 5 9 329.81 30.57
 4 -5 9 276.22 18.67
 4 -5 9 288.51 21.04
 4 -5 10 79.11 19.17
 4 -5 10 133.47 19.26
 4 -5 10 75.12 15.04
 4 5 10 91.93 26.78
 4 -5 11 157.81 16.73
 4 5 11 181.51 25.2
 4 -5 11 153.98 14.63
 4 -5 11 166.83 18.37
 4 -5 12 -8.1 15.04
 4 -5 12 -8.11 11.81
 4 -5 12 -11.72 12
 4 5 12 -13.67 20.6
 4 -5 13 43.4 11.48
 4 -5 13 50.36 8.11
 4 5 13 42.46 13.88
 -4 -6 16 60.36 7.59
 -4 -6 16 35.87 11.48
 -4 -6 15 -31.23 18.5
 -4 -6 15 -14.25 10.45
 -4 -6 14 10.77 12.92
 -4 -6 14 9.22 11.77
 -4 -6 14 -6.13 15.04
 -4 -6 13 25.64 14.02
 -4 -6 13 13.67 13.18
 -4 -6 13 16.36 16.05
 -4 -6 13 6.69 13.76
 -4 -6 12 28.73 14.62
 -4 -6 12 26.82 14.94
 -4 -6 12 30.15 14.17
 -4 -6 12 16.69 16.48
 -4 -6 11 37.81 17.77
 -4 -6 11 12.89 15.15
 -4 -6 11 27.64 15.99
 -4 -6 11 8.02 14.47
 -4 -6 10 3.03 16.31
 -4 -6 10 0.26 14.95
 -4 -6 10 -8.42 16.57
 -4 -6 9 39.3 14.78
 -4 -6 9 26.02 15.22
 -4 -6 8 -2.18 14.34
 -4 -6 8 -18.17 13.14
 -4 6 7 18.67 16.63
 -4 -6 7 47.85 12.23
 -4 -6 6 32.22 9.89
 -4 6 6 39.43 15.2
 -4 -6 6 34.01 9.43
 -4 -6 5 30.7 9.62
 -4 -6 5 31.07 8.24
 -4 6 4 80.4 12.57
 -4 -6 4 73.33 8.03
 -4 -6 4 79.58 9.74
 -4 6 3 26.6 11.61
 -4 -6 3 22.13 8.02
 -4 6 2 53.19 11.8
 -4 -6 2 49.15 7.59
 -4 6 1 53.12 10.34
 -4 -6 1 49.62 7.45
 -4 -6 0 982.43 30.15
 -4 6 -1 22.11 15.53
 -4 -6 -1 21.51 6.99
 4 -6 2 330.41 13.96
 4 -6 3 27.25 9.02
 4 6 4 107.33 23.28
 4 -6 4 108.24 11.08
 4 -6 5 57.78 14.33
 4 -6 5 59.67 13.08
 4 -6 5 45.82 11.66
 4 -6 6 61.59 14.94
 4 -6 6 49.18 13.92
 4 -6 6 80.29 13.14
 4 -6 7 19.13 14.68
 4 -6 7 14.7 13.22
 4 6 7 23.69 24.46
 4 -6 8 81.69 19.09
 4 -6 8 64.34 14.47
 4 6 8 71.82 25.45
 4 -6 8 70.36 16.28
 4 -6 9 21.83 15.73
 4 -6 9 27.84 18.55
 4 -6 9 35.41 14.6
 4 6 9 30 25.27
 4 -6 10 185.65 18.96
 4 6 10 184.47 23.88
 4 -6 10 166.49 14.23
 4 -6 10 161.62 17.32
 4 -6 11 37.3 14.24
 4 -6 11 -19.96 12.21
 4 -6 12 154.15 10.62
 4 -6 12 145.69 10.93
 -4 -7 15 16.54 13.57
 -4 -7 14 124.61 12.61
 -4 -7 14 152.57 14.54
 -4 -7 13 7.85 12.5
 -4 -7 13 6.21 14.62
 -4 -7 12 162.09 15.21
 -4 -7 12 154.46 15.61
 -4 -7 11 37.28 14.35
 -4 -7 11 20.77 14.67
 -4 -7 10 62.79 15.69
 -4 -7 10 68.53 14.59
 -4 -7 9 84.4 13.77
 -4 -7 8 -3.63 13.99
 -4 -7 8 -28.85 14.72
 -4 -7 7 16.24 13.98
 -4 7 7 12.63 18.45
 -4 -7 7 23.94 14.82
 -4 -7 6 174.26 15.4
 -4 7 6 198.22 20.98
 -4 -7 6 180.51 14.84
 -4 -7 5 40.06 10.94
 -4 -7 5 1.87 11.82
 -4 7 4 231.82 18.59
 -4 -7 4 231.19 13.81
 -4 -7 3 78.79 10.69
 -4 7 3 71.4 14.81
 -4 7 2 183.36 15.23
 -4 -7 2 170.32 11.59
 -4 7 1 120.85 14.29
 -4 -7 1 110.08 9.1
 -4 -7 0 20.08 8.2
 -4 -7 -1 399.98 15.52
 -4 -7 -2 6.34 7.99
 4 -7 2 15.11 8.71
 4 -7 3 176.41 11.72
 -4 -7 -3 200 11.36
 4 -7 4 3 9.89
 -4 -7 -4 9.71 8.05
 4 -7 5 99.02 13.11
 4 -7 5 111.41 13.46
 4 -7 5 73.07 11.58
 4 -7 6 27.13 13.39
 4 7 6 20.19 21.46
 4 -7 6 31.6 12.98
 4 7 7 187.41 23.77
 4 -7 7 140.01 14.35
 4 -7 7 155.31 15.3
 4 -7 8 5.82 17.28
 4 7 8 -2.5 21.91
 4 -7 8 15.56 12.85
 4 -7 8 9.04 13.31
 -4 -7 -8 9.96 7.3
 4 -7 9 344.23 20.02
 4 -7 9 310.36 16.21
 4 -7 10 -27.91 15.58
 4 -7 10 -5.82 13.22
 4 -7 11 49.53 9.24
 4 -7 11 61.75 9.21
 4 -7 11 40.38 10.68
 4 -7 12 11.93 6.15
 -4 -8 14 27.01 12.79
 -4 -8 13 35.54 10.52
 -4 -8 12 5.95 12.31
 -4 -8 12 17.83 10.62
 -4 -8 11 96.11 13.65
 -4 -8 11 120.37 14.13
 -4 -8 11 108.25 15.37
 -4 -8 10 70.21 13.81
 -4 -8 10 42.91 14.28
 -4 -8 10 77.29 15.82
 -4 -8 9 185.4 15.84
 -4 -8 9 192.01 17.29
 -4 -8 8 12.28 12.84
 -4 -8 8 17.75 14.5
 -4 8 7 258.05 21.86
 -4 -8 7 224.71 16.72
 -4 -8 7 239.15 16.81
 -4 8 6 78.58 20.03
 -4 -8 6 69.29 13.44
 -4 -8 6 61.48 13.09
 -4 -8 5 151.05 14.82
 -4 -8 5 133.06 14.22
 -4 8 4 42.41 19.27
 -4 -8 4 25.25 11.39
 -4 8 3 106.11 18.93
 -4 -8 3 105.96 11.84
 -4 -8 2 3.98 10.12
 -4 -8 2 3.5 11.48
 -4 -8 1 2.35 11.13
 -4 8 1 -4.09 15.39
 -4 -8 1 0.4 9.83
 -4 8 0 25.72 14.44
 -4 -8 0 11.58 9.58
 -4 8 -1 89.7 13.65
 -4 -8 -1 96.01 9.57
 -4 8 -2 26.27 11.52
 -4 -8 -2 36.56 9.64
 -4 8 -3 5.59 9.3
 4 -8 3 0.04 8.22
 -4 -8 -4 -1.42 7.55
 4 -8 4 -0.57 9.13
 4 -8 5 -0.04 11.46
 4 -8 5 -0.96 9.72
 -4 -8 -5 0.43 7.08
 4 -8 6 53.92 12.57
 -4 -8 -6 50.5 7.68
 4 -8 7 35.89 12.31
 4 -8 8 177.66 16.75
 4 -8 8 162.4 13.19
 4 -8 9 0.04 13.18
 4 -8 9 14.58 10.05
 4 -8 10 70.47 9.56
 4 -8 10 67.19 9.01
 4 -8 11 1.15 5.13
 -4 -9 13 33.96 7.02
 -4 -9 12 101.36 10.37
 -4 -9 12 87.89 10.78
 -4 -9 11 -1.13 9.91
 -4 -9 11 -0.75 11.6
 -4 -9 11 3.39 11.02
 -4 -9 10 364.42 16.78
 -4 -9 10 365.69 18.18
 -4 -9 10 383.41 18.31
 -4 -9 9 19.2 12.54
 -4 -9 9 11.11 12.62
 -4 -9 8 434.92 19.23
 -4 -9 8 332.43 18.97
 -4 -9 7 9.02 13.33
 -4 -9 7 -2.93 13.15
 -4 9 6 425.95 26.03
 -4 -9 6 364.57 18.53
 -4 -9 5 22.91 11.32
 -4 9 4 165.19 20.28
 -4 -9 4 128.09 12.79
 -4 9 3 39.11 18.32
 -4 -9 3 25.1 12.09
 -4 -9 3 10.19 9.92
 -4 9 2 133.54 18.12
 -4 -9 2 184.53 14.06
 -4 -9 2 153.39 12.15
 -4 9 1 21.83 15.39
 -4 -9 1 25.51 9.17
 -4 -9 1 17.11 10.62
 -4 9 0 399.84 20.43
 -4 -9 0 414.85 18.05
 -4 -9 0 410.15 16.72
 -4 9 -1 26.32 12.41
 -4 -9 -1 28.88 8.49
 -4 -9 -1 20.48 10.51
 -4 9 -2 276.33 14.76
 -4 -9 -2 265.81 14.86
 -4 -9 -2 287.54 13.35
 -4 9 -3 3.57 8.95
 -4 -9 -3 -0.91 7.49
 -4 -9 -4 15.62 7.25
 4 -9 5 13.3 10.27
 4 -9 6 13.49 10.38
 4 -9 8 5.79 10.78
 4 -9 8 28.91 9.3
 4 -9 9 5.72 8.17
 4 -9 9 -2.61 6.95
 -4 -10 12 6.19 5.05
 -4 -10 11 209.85 10.81
 -4 -10 11 206.8 10.72
 -4 -10 10 -0.85 8.81
 -4 -10 10 0.38 9.06
 -4 -10 9 114.83 11.57
 -4 -10 9 83.68 12.27
 -4 -10 8 82.77 12.97
 -4 -10 8 0.08 10.9
 -4 -10 7 124.9 11.93
 -4 10 6 30.44 18.39
 -4 -10 6 13.17 11.03
 -4 -10 5 29.01 10.52
 -4 -10 4 0.65 12.4
 -4 -10 4 -5.71 10.07
 -4 10 3 -7.76 18.35
 -4 -10 3 2.99 9.08
 -4 -10 3 -0.25 11.76
 -4 -10 2 4.28 8.98
 -4 -10 2 -3.7 11.58
 -4 10 1 -25.91 16.64
 -4 -10 1 0.16 8.53
 -4 -10 0 76.52 8.69
 -4 10 0 96.08 14.15
 -4 10 -1 2.17 11.66
 -4 -10 -1 7.32 7.06
 -4 -10 -1 7.82 9.37
 -4 10 -2 34.61 10.21
 -4 -10 -2 24.58 9.57
 -4 10 -3 86.6 9.23
 -4 -10 -3 77.91 9.81
 4 -10 4 52.77 9.28
 -4 -10 -4 38.84 8.39
 4 -10 6 72.6 8.54
 -4 -10 -6 33.04 6.54
 4 -10 7 1.42 8.67
 4 -10 7 0.41 6.68
 4 -10 8 26.62 6.36
 -4 -11 10 3.76 5.19
 -4 -11 9 18.38 5.75
 -4 -11 9 25.25 7.35
 -4 -11 8 7.75 6.68
 -4 -11 8 14.16 6.76
 -4 -11 7 34.95 7.76
 -4 -11 6 191.29 12.34
 -4 -11 6 17.99 8.46
 -4 -11 5 1.12 9.62
 -4 -11 5 12.85 7.85
 -4 -11 4 35.59 7.89
 -4 -11 4 8.39 10.56
 -4 -11 3 49.15 11.64
 -4 11 3 35.24 16.52
 -4 -11 3 32.08 7.54
 -4 -11 2 90.43 11.41
 -4 11 2 41.85 15.75
 -4 11 1 153.66 14.96
 -4 -11 1 96.56 11.42
 -4 -11 0 23.85 9.85
 -4 11 0 -10.16 11.94
 -4 11 -1 49.89 10.65
 -4 -11 -1 5.85 10.34
 -4 -11 -2 -1.72 7.83
 -4 11 -2 -10.01 8.18
 4 -11 3 -11.6 7.41
 -4 -11 -3 7.19 6.75
 4 -11 4 -1.62 6.24
 -4 -11 -4 4.01 5.55
 4 -11 6 3.96 6.04
 -4 -12 7 3.43 4.8
 -4 -12 6 11.42 5.68
 -4 -12 5 1.26 6.32
 -4 -12 4 25.19 6.73
 -4 -12 3 1.75 6.77
 -4 -12 2 49.79 6.97
 4 12 -1 -3.51 6.38
 -4 -12 1 2.13 6.17
 -4 -12 0 17.69 5.81
 -4 -12 -1 -0.33 4.76
 -5 0 18 102.89 14.73
 -5 0 17 -28.35 19.51
 -5 0 16 115.89 23.1
 -5 0 15 28.45 24.76
 -5 0 14 71.94 25.42
 -5 0 13 1.67 25.01
 -5 0 12 16.05 24.95
 -5 0 11 -4.04 17.06
 -5 0 10 462.01 23.2
 -5 0 10 424.6 21.11
 -5 0 9 6.28 11.83
 -5 0 9 5.77 14.61
 -5 0 8 323.08 14.95
 -5 0 8 339.06 17.07
 -5 0 8 298.72 16.25
 -5 0 7 2.35 8.15
 -5 0 7 -1.96 8.53
 5 0 -7 0.34 12.18
 -5 0 7 -2.22 10.78
 -5 0 6 522.09 17.68
 5 0 -6 521.94 25.05
 -5 0 5 -2.42 8.04
 5 0 -5 -0.6 10.89
 -5 0 5 -4.03 12.9
 -5 0 4 911.62 27.43
 5 0 -4 878.86 26.66
 5 0 -4 890.41 32.65
 -5 0 3 -5.11 9.42
 5 0 -3 3.8 9.56
 5 0 -3 -0.56 3.95
 -5 0 2 4.09 9.38
 5 0 -2 2.64 9.06
 5 0 -2 -1.25 3.72
 5 0 -1 4.19 7.53
 5 0 -1 9.89 11.31
 -5 0 1 0.74 5.75
 5 0 0 1756.56 49.52
 5 0 0 1923.51 56.56
 5 0 1 0.55 4.45
 5 0 1 0.96 7.16
 5 0 1 -1.45 11.64
 -5 0 -1 -2.59 5.65
 5 0 2 241.34 11.93
 -5 0 -2 222.3 11.98
 5 0 2 218.43 13.75
 -5 0 -2 207.59 11.89
 5 0 3 1.66 9.87
 5 0 3 0.39 6.48
 5 0 3 -8.63 12.29
 -5 0 -3 -1.81 5.9
 -5 0 -3 4.77 5.65
 5 0 3 8.59 11.94
 5 0 4 1639.47 46.29
 5 0 4 1480.41 44.66
 5 0 4 1512.68 47.42
 5 0 5 -0.33 14.86
 5 0 5 -0.33 13.28
 5 0 5 -1.92 9.77
 5 0 6 1296.3 40.75
 5 0 6 1282.6 44.45
 5 0 7 0.57 17.79
 5 0 7 -2.14 21.35
 5 0 8 223.56 29.12
 5 0 9 6.56 22.58
 5 0 10 351.24 27.55
 5 0 11 -9.93 18.1
 5 0 11 3.63 23.1
 5 0 12 450.95 23.52
 5 0 12 575.7 29.98
 5 0 13 10 11.78
 5 0 13 -13.66 16.25
 5 0 14 67.85 8.15
 5 0 14 45.74 10.54
 -5 1 18 6.64 12.01
 -5 -1 18 -0.75 13.34
 -5 1 16 20.24 20.32
 -5 -1 16 43.44 21.86
 -5 -1 15 -7.15 25.55
 -5 1 14 157.21 24.77
 -5 -1 14 159.61 25.65
 -5 1 13 48.28 24.53
 -5 -1 13 51.39 25.12
 -5 -1 13 11.16 11.26
 -5 -1 12 182.57 25.14
 -5 1 12 179.52 25.59
 -5 1 11 147.14 22.1
 -5 -1 11 126.11 12.14
 -5 1 10 187.84 19.64
 -5 -1 10 148.79 11.62
 -5 -1 10 169.28 15.3
 -5 1 10 159.97 16.84
 -5 -1 9 135.12 12.76
 -5 1 9 166.69 16.2
 -5 -1 9 135.1 10.52
 -5 -1 8 6.08 9.33
 -5 1 8 8.19 7.12
 -5 1 8 10.65 12.23
 -5 -1 8 4.31 7.23
 -5 -1 7 319.56 13.85
 -5 1 7 339.15 16.14
 5 1 -7 353.12 13.34
 -5 1 7 322.02 17.81
 -5 -1 7 336.18 12.79
 5 1 -7 317.57 22.3
 5 -1 -7 300.84 20.41
 -5 -1 6 161.02 9.56
 5 1 -6 163.75 16.4
 -5 1 6 157.11 14.23
 5 1 -6 172.11 8.65
 -5 -1 6 175.83 8.58
 5 -1 -6 151.15 14.91
 5 -1 -5 599.8 25.74
 -5 -1 5 527.88 18.82
 -5 1 5 577.03 27.28
 5 1 -5 619.53 20.21
 -5 -1 5 601.78 18.59
 5 1 -5 562.19 26.9
 -5 1 4 -0.67 12.99
 -5 -1 4 8.51 7.21
 5 1 -4 8.96 11.7
 5 -1 -4 9.43 8.91
 5 1 -4 12.42 6
 -5 -1 3 1364.71 40.98
 5 -1 -3 1361.36 45.32
 5 1 -3 1382.88 41.62
 5 1 -3 1449.33 46.51
 -5 -1 2 154.51 10.87
 -5 1 2 136.1 8.23
 5 -1 -2 137.7 11.53
 5 1 -2 138.8 8.19
 5 1 -2 154.57 13.16
 -5 -1 1 1467.21 44.28
 -5 1 1 1447.74 45.13
 5 1 -1 1481.19 44.15
 5 -1 -1 1453.44 49.1
 5 1 -1 1559.45 46.28
 -5 -1 0 413.98 17.95
 -5 1 0 391.32 17.07
 5 1 0 561.55 17.91
 5 1 0 473.28 16.49
 5 -1 0 603.72 23.81
 5 1 1 245.08 10.49
 -5 -1 -1 254.26 12.92
 5 1 1 258.95 14.23
 -5 1 -1 266.54 12.93
 5 1 2 1.67 7.48
 5 -1 2 6.97 11.15
 -5 -1 -2 1.91 6.45
 -5 -1 -2 5.15 5.88
 -5 1 -2 0.51 5.42
 -5 1 -2 1.8 5.49
 5 1 2 3.7 11.78
 5 -1 2 3.45 9.38
 5 1 3 1099.98 33.69
 5 -1 3 1180.77 34.56
 -5 -1 -3 1056.42 37.11
 5 1 3 1128 36.31
 5 -1 3 1085.3 32.77
 5 -1 3 1127.14 35.23
 5 1 4 80.08 11.11
 5 -1 4 89.66 12.6
 -5 -1 -4 60.4 8.44
 5 -1 4 79.12 9.04
 5 1 4 75.14 15.06
 5 -1 4 82.51 13.43
 5 1 5 752.19 26.78
 5 1 5 755.86 30.44
 5 -1 5 740.64 25.25
 5 -1 5 727.34 28.47
 5 1 6 30.73 15.04
 5 -1 6 46.16 16.95
 5 -1 6 27.19 11.15
 5 1 6 16.98 18.54
 5 -1 6 22.44 17.14
 5 1 7 224.06 20.26
 5 -1 7 265.45 22.33
 5 1 7 232.17 25.02
 5 -1 7 184.39 15.25
 5 -1 7 211.89 21.85
 5 1 8 -16.98 20.2
 5 -1 8 4.97 14.42
 5 -1 8 4.85 21.44
 5 1 9 96.15 25.86
 5 -1 9 87.55 22.79
 5 -1 10 -0.07 19.66
 5 -1 10 12.58 22.39
 5 1 10 2.83 25.22
 5 -1 11 219.62 19.58
 5 1 11 221.51 25.68
 5 -1 11 199.52 23.75
 5 1 12 260.93 18.34
 5 -1 12 228 23.24
 5 -1 13 104.6 12.69
 5 1 13 126.83 12.91
 5 1 13 148.36 16.44
 5 -1 13 110.5 16.31
 5 1 14 9.92 7.69
 5 -1 14 10.31 6.56
 5 1 14 1.64 9.69
 5 -1 14 12.7 9.46
 -5 -2 18 13 11.74
 -5 2 17 83.05 17.7
 -5 2 16 51.41 18.54
 -5 2 15 -21.4 22.22
 -5 2 14 22.81 21.85
 -5 -2 14 5.75 12.47
 -5 2 13 664.45 30.64
 -5 -2 13 470.03 24.18
 -5 2 12 125.74 24.61
 -5 -2 12 95.31 15.41
 -5 -2 11 277.18 23.63
 -5 2 11 200.08 25.24
 -5 -2 11 246.82 16.74
 -5 2 11 208.91 22.52
 -5 -2 10 76.03 14.86
 -5 2 10 66.06 15.48
 -5 -2 10 71.3 11.82
 -5 -2 10 80.7 18.77
 -5 2 10 75.47 18.06
 -5 2 9 396.12 19.27
 -5 -2 9 422.14 21.23
 -5 2 9 424.97 20.34
 -5 -2 9 400.97 17.1
 -5 -2 9 368.39 17.93
 -5 -2 8 92.46 10.53
 -5 2 8 90.51 12.17
 -5 -2 8 86.4 13.2
 -5 2 8 103.01 13.3
 -5 -2 8 92.27 9.49
 -5 -2 7 183.91 11.24
 -5 2 7 209.23 12.52
 -5 2 7 180.68 14.69
 -5 -2 7 207.85 13.63
 -5 2 7 201.1 13.76
 5 2 -7 169.07 10.1
 -5 -2 7 201.57 10.71
 -5 -2 6 32.41 7.73
 -5 2 6 24.08 9.1
 5 -2 -6 32.03 11.71
 5 2 -6 29.59 6.07
 -5 2 6 22.74 9.92
 -5 -2 6 24.69 6.77
 -5 -2 5 243.09 11.11
 -5 2 5 254.32 13.45
 5 -2 -5 255.17 17.11
 -5 2 5 258.47 16.59
 5 2 -5 256.9 12.06
 -5 -2 5 271.7 10.92
 -5 -2 4 11.45 6.55
 -5 2 4 13.44 10.12
 5 -2 -4 14.06 9.96
 5 2 -4 4.94 6.53
 5 2 -4 14.34 5.61
 -5 2 4 14.85 11.17
 -5 -2 4 13.53 5.54
 -5 -2 3 165.94 9.09
 -5 2 3 181.31 13.4
 5 2 -3 178.98 10.13
 -5 -2 3 178.9 8.32
 -5 2 2 345.86 17.36
 -5 2 2 330.31 13.06
 5 2 -2 332.68 14.09
 5 2 -1 105.52 11.27
 5 2 -1 119.69 8.59
 -5 2 1 108.89 7.71
 5 2 -1 99.16 14.5
 5 -2 -1 106.19 11.4
 -5 -2 1 119.21 9.04
 -5 2 1 148.59 16.53
 5 2 0 329.75 14.2
 -5 2 0 369.63 21.71
 5 2 0 372.33 22.9
 5 -2 0 369.7 18.69
 5 2 1 33.36 6.68
 -5 2 -1 47.29 12.8
 5 2 1 57.93 15.12
 5 -2 1 48.4 10.82
 5 2 1 35.3 11.63
 5 2 1 42.99 7.49
 5 2 2 23.48 7.8
 5 2 2 33.84 15.33
 5 -2 2 35.91 10.54
 -5 -2 -2 29.15 6.73
 5 2 2 15.97 12.3
 -5 2 -2 29.2 11.66
 5 2 3 10.17 8.54
 5 -2 3 4.09 6.83
 -5 -2 -3 7.7 6.59
 5 2 3 8.88 13.93
 5 -2 3 8.56 11.51
 -5 2 -3 1.13 9.94
 5 2 4 208.29 13.08
 5 2 4 215.74 18.28
 5 -2 4 200.71 11.15
 5 -2 4 219.8 15.4
 5 2 5 3.98 12.11
 5 -2 5 0.71 13.83
 5 -2 5 0.13 9.75
 5 2 5 1.83 18.65
 5 -2 5 -4.82 14.31
 5 -2 6 265.56 20.85
 5 2 6 211.75 23.71
 5 -2 6 233.83 14.52
 5 -2 6 223.54 18.64
 5 2 6 232.76 17.73
 5 2 7 87.69 18.86
 5 -2 7 72.39 13.68
 5 2 7 89.96 25.96
 5 -2 7 71.76 18.75
 5 2 8 200.52 19.97
 5 2 8 194.52 26.15
 5 -2 8 183.43 15.84
 5 -2 8 217.9 21.98
 5 2 9 329.7 23.11
 5 2 9 311.9 27.95
 5 -2 9 290.82 18.04
 5 -2 9 278.86 23.76
 5 -2 10 4.52 18.45
 5 2 10 11.97 26.37
 5 -2 10 8.95 20.87
 5 -2 11 91.44 17.57
 5 2 11 69.25 24.74
 5 -2 11 70.36 20.85
 5 -2 12 50.08 18.7
 5 2 13 59.48 11.63
 5 -2 13 41.06 10.8
 5 -2 13 63.35 13.97
 5 -2 14 -2.14 7.88
 -5 -3 18 115.25 11.06
 -5 -3 17 -10.16 14.5
 -5 -3 16 303.26 23.4
 -5 3 15 -6.35 17.7
 -5 -3 15 3.89 21.1
 -5 3 14 209.52 21.92
 -5 -3 14 237.32 25.19
 -5 -3 14 210.01 17.87
 -5 3 13 19.42 19.78
 -5 -3 13 8.66 23.29
 -5 -3 13 14 15.31
 -5 3 12 495 26.16
 -5 -3 12 458.86 28.09
 -5 3 11 122.45 22.44
 -5 -3 11 126.2 21.76
 -5 -3 11 83.56 17.82
 -5 3 11 119.3 21.05
 -5 3 10 352.48 21.94
 -5 -3 10 352.39 18.79
 -5 3 10 343.37 21.54
 -5 3 9 163.84 14.69
 -5 -3 9 159.18 17.06
 -5 3 9 177.37 16.75
 -5 -3 9 128.33 10.17
 -5 -3 9 163.58 13.01
 -5 3 8 281.03 16.1
 -5 -3 8 267.49 16.86
 -5 3 8 293.96 16.71
 -5 -3 8 279.42 12.97
 -5 -3 8 287.72 13.7
 -5 -3 8 281.51 14.18
 -5 -3 7 161.17 10.61
 -5 3 7 160.29 12.8
 -5 -3 7 147.77 13.09
 -5 3 7 183.49 13.85
 5 3 -7 154.13 10.25
 -5 -3 7 176.84 9.41
 -5 -3 7 156.63 10.05
 -5 -3 6 300.04 12.64
 -5 3 6 316.19 14.89
 -5 3 6 312.48 18.22
 -5 -3 6 277.5 14.46
 5 3 -6 312.8 14.48
 -5 -3 6 314.71 12.09
 -5 -3 6 331.26 13.37
 -5 -3 5 114.92 7.89
 5 -3 -5 136.3 14.62
 -5 3 5 127.95 11.52
 5 3 -5 114.39 10.38
 5 3 -5 131.24 9.48
 -5 -3 5 128.26 8.41
 -5 3 5 128.88 12.88
 -5 -3 4 434.57 15.6
 -5 3 4 456.33 18.6
 5 3 -4 499.24 20.05
 5 3 -4 434.62 18.03
 -5 3 4 479.09 22.34
 -5 3 3 2.53 5.79
 -5 3 3 3.69 11.62
 -5 3 3 0.64 8.92
 5 3 -3 3.52 6.03
 5 3 -3 1 6.98
 -5 -3 3 5.88 5.4
 -5 3 2 334.49 17.48
 -5 3 2 303.27 11.49
 -5 3 2 360.73 19.1
 5 3 -2 362.87 15.58
 -5 3 2 299.75 11.92
 5 3 -2 310.66 21.41
 5 -3 -2 321.5 16.27
 -5 3 1 20.74 5.47
 -5 3 1 23.57 14.24
 5 3 -1 21.97 14.09
 5 -3 -1 25.32 8.68
 5 3 -1 24.54 10.35
 5 3 -1 26.54 7.35
 -5 3 1 28.53 10.44
 5 -3 0 106.42 11.1
 -5 3 0 96.07 11.95
 5 3 0 93.73 13.15
 5 3 0 114.84 9.45
 5 3 0 112.51 16.98
 5 3 1 3.7 7.01
 5 3 1 3.05 14.17
 5 -3 1 2.91 8.61
 -5 3 -1 7.85 8.98
 5 3 1 3.76 12.85
 5 3 1 0.84 6.77
 5 3 2 20.18 8.26
 5 3 2 22.3 13.63
 -5 3 -2 28.72 9.33
 5 3 2 32.47 8.23
 5 3 3 43.67 9.78
 5 -3 3 43.47 7.67
 5 3 3 52.58 14.66
 5 3 4 102.85 12.59
 5 -3 4 113.94 10.11
 5 -3 4 108.6 14.14
 5 3 4 112.62 19.08
 5 3 5 -4.3 13.74
 5 -3 5 -2.34 10.14
 5 3 5 -3.14 20.3
 5 -3 5 -6.03 15.01
 5 3 6 19.03 16.11
 5 -3 6 43.63 19.83
 5 -3 6 31.79 11.38
 5 3 6 39.9 24.1
 5 -3 6 25.26 16.95
 5 3 7 5.86 18.93
 5 -3 7 43.2 13.29
 5 -3 7 34.58 18.85
 5 3 8 146.3 19.76
 5 -3 8 131.1 14.71
 5 -3 8 142.47 19.65
 5 3 8 137.82 25.95
 5 3 9 25.07 18.97
 5 -3 9 31.38 19.86
 5 -3 9 25.25 13.42
 5 3 9 29.65 26.71
 5 -3 9 21.46 18.68
 5 -3 10 397.58 22.47
 5 -3 10 386.36 19.27
 5 -3 10 382.11 24.54
 5 -3 11 -3.76 15.46
 5 -3 11 12.35 18.08
 5 -3 12 52.76 13.39
 5 -3 12 43.36 15.96
 5 3 13 -2.17 10.31
 5 -3 13 -3.08 8.87
 5 -3 13 -3.62 11.61
 -5 -4 17 55.37 12.18
 -5 -4 16 -22.05 15.52
 -5 -4 15 161.24 20.13
 -5 -4 14 49.5 21.34
 -5 -4 14 42.95 16.48
 -5 -4 13 173.49 23.27
 -5 -4 13 191.59 18.69
 -5 -4 12 5.48 19.41
 -5 -4 12 -7.04 16.61
 -5 -4 11 343.34 23.99
 -5 -4 11 287.75 20.86
 -5 4 10 -23.26 19.66
 -5 4 10 1.88 17.1
 -5 -4 10 -2.17 19.64
 -5 -4 10 10.73 11.9
 -5 -4 10 -3.86 16.46
 -5 4 9 444.45 21.99
 -5 -4 9 458.29 22.51
 -5 4 9 452.57 20.93
 -5 -4 9 413.52 17.76
 -5 4 8 241.22 16.16
 -5 -4 8 236.78 17.35
 -5 4 8 263.25 16.64
 -5 -4 8 274.74 13.32
 -5 -4 8 253.75 14.03
 -5 4 7 29.94 11.87
 -5 -4 7 23.88 12.46
 -5 4 7 27.4 12.07
 -5 -4 7 16.47 9.38
 -5 -4 7 13.58 8.27
 -5 4 6 652.85 23.63
 -5 -4 6 634.58 23.27
 -5 -4 6 694.77 21.93
 -5 -4 6 679.01 22.55
 -5 4 5 37.43 10.6
 -5 4 5 41.39 8.87
 -5 -4 5 35.61 10.19
 -5 -4 5 45.93 9.98
 -5 -4 5 46.51 6.55
 -5 -4 5 39.83 8.08
 -5 4 4 80.84 8.48
 -5 -4 4 69.29 9.62
 -5 4 4 75.38 11.14
 5 4 -4 85.9 10.22
 5 4 -4 76.82 8.4
 -5 -4 4 81.04 7.68
 -5 4 3 8.85 11.04
 -5 4 3 12.48 6.93
 5 -4 -3 10.21 7.22
 5 4 -3 19.81 6.45
 5 4 -3 15.77 7.97
 -5 -4 3 14.03 6.11
 -5 4 2 187.93 9.45
 5 4 -2 211.97 13.41
 5 4 -2 194.64 12.14
 5 4 -2 193.51 19.21
 -5 4 2 212.6 14.63
 -5 -4 2 178.28 9.31
 5 -4 -2 179.87 11.9
 -5 4 1 67.93 7.12
 -5 4 1 45 13.98
 5 4 -1 79.72 16.15
 5 4 -1 68.58 9.56
 -5 4 1 73.48 10.7
 5 4 0 633.51 32.15
 -5 4 0 542.06 18.56
 5 4 0 586.74 22.93
 -5 4 0 587.42 24.87
 5 4 1 108.47 9.22
 5 4 1 100.02 14
 -5 4 -1 97.48 10.88
 5 4 2 405.21 16.6
 5 4 2 464.77 22.49
 5 4 3 41.45 10.8
 5 -4 3 38.56 8.58
 5 4 3 31.81 18.17
 5 4 4 41.89 12.5
 5 -4 4 36.71 12.81
 5 -4 4 41.38 9.72
 5 4 4 37.2 19.2
 5 4 5 71.79 14.81
 5 -4 5 73.48 11.24
 5 4 5 68.7 22.62
 5 -4 5 76.32 14.28
 5 -4 6 84.78 16.27
 5 4 6 102.88 17.29
 5 -4 6 84.11 13.31
 5 4 6 70.7 24.86
 5 4 7 48.94 17.44
 5 -4 7 53.99 12.97
 5 4 7 45.47 25.75
 5 -4 7 31.39 16.52
 5 4 8 5.54 18.18
 5 -4 8 0.05 12.7
 5 -4 8 -9.08 17.02
 5 4 9 2.31 18.95
 5 -4 9 16.25 20.01
 5 -4 9 17.46 12.79
 5 -4 9 22.46 17.55
 5 4 10 14.75 18.21
 5 -4 10 1.37 16.09
 5 -4 10 -3.67 12.32
 5 -4 10 8.85 16.47
 5 -4 11 111.75 15.64
 5 -4 11 43.65 16.07
 5 -4 12 -3.43 10.62
 5 4 12 6.87 16.94
 5 -4 12 -3.74 13.57
 5 -4 13 8.3 6.63
 5 4 13 2.44 10.17
 5 -4 13 8.08 8.23
 -5 -5 17 7.13 6.97
 -5 -5 16 15.71 11.55
 -5 -5 15 18.76 18.64
 -5 -5 14 1.83 15.99
 -5 -5 14 7.72 16.17
 -5 -5 13 32.67 18.27
 -5 -5 13 30.52 12.21
 -5 -5 12 14.36 16.98
 -5 -5 12 0.44 17.47
 -5 -5 12 0.62 13.18
 -5 -5 11 16.18 17.9
 -5 -5 11 22.47 16.84
 -5 -5 10 16.81 17.42
 -5 -5 10 18.08 13.36
 -5 5 10 15.32 17.31
 -5 5 9 60.73 18.18
 -5 -5 9 81.5 18.33
 -5 -5 9 85.91 16.44
 -5 5 8 94.63 14.78
 -5 -5 8 91.58 15.32
 -5 -5 8 104.41 13.3
 -5 5 7 289.51 16.52
 -5 -5 7 299.82 17.38
 -5 -5 7 301.21 14.41
 -5 -5 7 295.77 15.67
 -5 5 6 146.63 12.8
 -5 -5 6 128.94 13.02
 -5 -5 6 143.06 9.99
 -5 -5 6 131.76 11.11
 -5 5 5 210.67 13.96
 -5 5 5 198.88 13.56
 -5 -5 5 210.71 13.1
 -5 -5 5 214.32 10.89
 -5 -5 5 219.93 12.21
 -5 5 4 21.3 10.46
 -5 5 4 32.24 10.65
 -5 5 3 80.32 11.08
 -5 5 3 245.62 12.24
 -5 5 2 3.39 8.9
 -5 5 2 32.48 9.07
 -5 5 1 1118.45 25.97
 -5 -5 1 1108.21 25.95
 -5 5 0 226.89 10.74
 -5 5 0 123.57 18.97
 -5 5 -1 1331.31 38.98
 5 5 1 1349.1 43.38
 5 5 2 105.01 12.2
 5 5 2 106.98 17.89
 5 5 3 729.44 25.45
 5 -5 3 682.55 23.25
 5 5 4 23 13.5
 5 -5 4 24.2 10.64
 5 5 4 13.07 22.56
 5 5 5 493.78 22.41
 5 5 5 444.97 29.99
 5 -5 5 470.88 18.99
 5 -5 5 426.11 20.8
 5 -5 6 3.68 13.75
 5 5 6 12.3 16.47
 5 5 7 187.81 18.9
 5 -5 7 167.26 13.89
 5 -5 7 165.23 16.55
 5 5 8 4.46 18.25
 5 -5 8 5.54 18.81
 5 -5 8 5.45 11.56
 5 -5 8 3.51 15.65
 5 5 9 50.85 19.03
 5 -5 9 52.15 18.95
 5 -5 9 35.64 12.47
 5 -5 9 27.82 15.55
 5 5 10 8.63 17.1
 5 -5 10 -7.36 15.01
 5 -5 10 5.47 10.69
 5 5 10 -7.45 22.69
 5 -5 10 11.74 14.35
 5 -5 11 128.5 12.68
 5 -5 11 22.65 9.8
 5 5 11 122 20.36
 5 -5 11 -6.8 13.3
 5 -5 12 39.19 8.52
 5 5 12 19.49 12.08
 5 -5 12 20.95 8.77
 -5 -6 15 -14.23 10.08
 -5 -6 14 19.02 12.16
 -5 -6 13 1.78 13.72
 -5 -6 13 44.65 12.9
 -5 -6 13 4.1 15.52
 -5 -6 12 13.7 14.97
 -5 -6 12 28.61 17.27
 -5 -6 12 17.25 13.12
 -5 -6 11 14.6 16.65
 -5 -6 11 6.02 14.48
 -5 -6 10 29.24 14.74
 -5 -6 10 7.5 15.07
 -5 -6 10 14.33 13.49
 -5 6 9 18.71 14.64
 -5 -6 9 15.16 14.3
 -5 -6 9 16.46 14.36
 -5 -6 9 2.17 15.01
 -5 -6 8 238.04 17.19
 -5 -6 8 179.15 18.39
 -5 -6 7 -13.64 13.09
 -5 6 7 11.67 12.71
 -5 6 6 97.19 12.41
 -5 -6 6 109.17 12.64
 -5 6 5 90.36 11.53
 -5 6 5 94.25 15.08
 -5 -6 5 92.08 10.99
 -5 6 4 115.69 14.13
 -5 6 4 99.21 11.5
 -5 -6 4 96.38 9.75
 -5 -6 4 111.28 11.49
 -5 6 3 115.43 13.3
 -5 6 3 76.57 11.48
 -5 -6 3 111.84 10.15
 -5 6 2 262.1 14.06
 -5 -6 2 240.59 11.81
 -5 6 1 68.53 10.43
 -5 -6 1 65.13 8.53
 -5 6 0 1231.81 33.78
 -5 -6 0 1208.48 33.92
 -5 6 -1 -18.26 19.4
 -5 6 -1 3.14 8.25
 -5 6 -2 205.03 25.44
 5 6 3 18.08 20.12
 5 -6 3 -1.79 9.8
 5 -6 4 132.41 11.54
 5 -6 5 0.04 10.28
 5 -6 6 215.19 13.86
 5 -6 7 4.22 19.23
 5 -6 7 2.61 11.61
 5 -6 7 -1.34 13.09
 5 -6 8 300.43 20.69
 5 6 8 314.57 26.56
 5 -6 8 292.82 15.41
 5 -6 8 257.44 17.62
 5 -6 9 89.32 17.75
 5 -6 9 70.18 11.34
 5 6 9 75.84 21.32
 5 -6 9 54.43 13.95
 5 -6 10 66.37 10.93
 5 6 10 51.11 18.67
 5 -6 10 84.72 12.53
 5 -6 11 8.35 8.78
 5 -6 11 10.05 7.55
 -5 -7 15 -4.68 9.41
 -5 -7 14 25.87 11.77
 -5 -7 13 0.21 10.95
 -5 -7 13 46.29 14.41
 -5 -7 12 16.52 13.08
 -5 -7 12 24.34 15.34
 -5 -7 11 2.11 14.11
 -5 -7 11 19.24 16.21
 -5 -7 10 97.31 14.43
 -5 -7 9 99.52 14.39
 -5 -7 8 16.44 13.09
 -5 -7 7 194.42 15.83
 -5 -7 6 122.43 15.16
 -5 -7 6 62.48 12.57
 -5 7 5 111.07 18.43
 -5 -7 5 96.12 12.71
 -5 -7 5 86.47 12.59
 -5 7 4 104.92 15.9
 -5 -7 4 88.67 12.38
 -5 -7 4 104.27 12.47
 -5 7 3 247.4 17.92
 -5 -7 3 208.38 13.86
 -5 -7 3 216.4 14.42
 -5 7 2 92.21 14.69
 -5 -7 2 91.46 11.61
 -5 7 1 593.27 22.68
 -5 -7 1 575.28 21.38
 -5 7 0 82.84 11.59
 -5 -7 0 68.62 9.94
 -5 7 -1 393.97 16.5
 -5 -7 -1 392.06 16.89
 -5 7 -2 100.6 9.53
 -5 7 -2 103.86 20.92
 -5 -7 -2 103.94 10.77
 -5 7 -3 194.33 21.14
 5 -7 3 157.29 11.56
 -5 -7 -3 162.41 11.86
 5 -7 4 48.78 10.19
 -5 -7 -4 44.2 9.35
 -5 7 -5 79.4 19.3
 5 -7 5 72.89 10.87
 -5 -7 -5 82.7 9.96
 -5 -7 -6 10.39 8.43
 5 -7 6 8.8 10.36
 5 -7 7 110.23 18.01
 5 -7 7 101.03 11.57
 -5 -7 -7 86.19 9.12
 5 -7 8 5.33 14.82
 5 -7 8 -3 9.5
 -5 -7 -8 -0.42 6.79
 -5 7 -9 49.86 11.41
 5 -7 9 60.88 13.97
 5 -7 9 57.8 9.76
 -5 -7 -9 21.16 6.02
 5 -7 10 2.85 9.04
 5 -7 10 4.48 6.92
 5 -7 11 16.64 5.8
 -5 -8 14 3.54 10.05
 -5 -8 14 1.59 8.17
 -5 -8 13 107.58 10.19
 -5 -8 13 106.23 11.78
 -5 -8 11 147.73 13.87
 -5 -8 10 -0.71 12.35
 -5 -8 9 199.19 15.97
 -5 -8 9 204.74 17.75
 -5 -8 8 28.67 13.19
 -5 -8 8 41.06 14.99
 -5 -8 7 242.22 16.65
 -5 -8 7 261.21 16.77
 -5 -8 6 103.7 14.13
 -5 -8 6 109.5 14
 -5 8 5 33.34 17.91
 -5 -8 5 17.74 12.21
 -5 -8 5 29.48 12.41
 -5 8 4 53.34 17.16
 -5 -8 4 44.92 11.9
 -5 -8 4 45.7 11.72
 -5 8 3 20.15 16.07
 -5 -8 3 20.1 11.48
 -5 8 2 92.09 15.31
 -5 -8 2 102.12 12.34
 -5 8 1 -4.92 12.76
 -5 -8 1 0.05 10.36
 -5 8 0 16.47 11.57
 -5 -8 0 25.19 10.12
 -5 8 -1 96.56 10.79
 -5 -8 -1 95.4 10.3
 -5 8 -2 -1.48 8.57
 -5 -8 -2 -11.05 8.92
 5 -8 3 2.23 8.98
 -5 -8 -3 0.09 8.44
 5 -8 4 22.86 9.8
 -5 -8 -4 26.19 8.7
 5 -8 5 55.59 9.82
 -5 -8 -5 41.48 8.17
 5 -8 6 20.23 9.66
 -5 -8 -6 12.64 7.34
 5 -8 7 48.28 9.44
 -5 -8 -7 26.55 6.81
 5 -8 8 106.92 13.17
 5 -8 8 59.07 8.64
 5 -8 9 28.3 9.58
 5 -8 9 8.82 6.02
 5 -8 10 3.84 5.29
 -5 -9 12 120.2 9.51
 -5 -9 12 138.89 10.48
 -5 -9 11 37.73 10.8
 -5 -9 10 281.93 16.46
 -5 -9 10 108.18 15
 -5 -9 9 0.05 11.6
 -5 -9 9 -2.87 12.38
 -5 -9 8 321.62 16.79
 -5 -9 8 357.13 18.1
 -5 -9 7 -3.86 12.73
 -5 -9 6 337.04 23.67
 -5 -9 6 1230.41 28.62
 -5 -9 5 -7.28 11.97
 -5 9 5 -4.79 17.67
 -5 -9 5 -14.02 12.9
 -5 9 4 116.81 18.63
 -5 -9 4 58.23 12.17
 -5 9 3 0.89 15.6
 -5 -9 3 1.6 10.36
 -5 9 2 5.9 15.22
 -5 -9 2 11.6 10.23
 -5 9 1 -4.21 13.2
 -5 -9 1 1.27 9.66
 -5 -9 1 -0.35 10.72
 -5 9 0 8.79 11.54
 -5 -9 0 -1.86 9.52
 -5 -9 0 -6.35 10.99
 -5 9 -1 11.42 9.55
 -5 -9 -1 10.95 9.03
 -5 -9 -1 5.33 10.91
 -5 9 -2 0.51 8.02
 5 -9 2 4.8 8.57
 -5 -9 -2 -5.98 8.38
 5 -9 3 64.73 9.14
 -5 -9 -3 77.5 9.07
 5 -9 4 61.47 9.17
 -5 -9 -4 74.87 8.59
 5 -9 5 14.33 8.45
 5 -9 6 39.23 8.39
 5 -9 7 4.11 9.77
 -5 -9 -7 6.77 6.06
 5 -9 8 34.13 8.51
 -5 -10 11 24.72 7.07
 -5 -10 11 23.89 6.63
 -5 -10 10 12.48 8.49
 -5 -10 10 15.39 8.28
 -5 -10 9 105.35 10.17
 -5 -10 9 85.25 10.9
 -5 -10 8 6.78 10.17
 -5 -10 8 10.76 10.35
 -5 -10 7 64.8 12.85
 -5 -10 7 36.92 10.53
 -5 -10 6 3.06 10.6
 -5 -10 6 9.31 10.66
 -5 -10 5 65.9 11.13
 -5 10 4 161 16.37
 -5 -10 4 118.83 11.45
 -5 10 3 -5.02 14.36
 -5 -10 3 4.01 9.01
 -5 -10 3 9.21 10.86
 -5 -10 2 164.23 12.71
 -5 -10 2 145.65 11.28
 -5 10 1 -5.32 11.81
 -5 -10 1 6.76 8.25
 -5 -10 1 -2.69 9.92
 -5 10 0 178.22 12.47
 -5 -10 0 176.71 12.12
 -5 -10 0 150.18 10.28
 -5 -10 -1 6.08 7.19
 -5 10 -1 7.59 8.69
 -5 -10 -1 0.75 8.91
 -5 -10 -2 3.27 9.01
 -5 10 -2 16.17 6.93
 -5 -10 -2 7.24 6.64
 -5 -10 -3 10.11 9.21
 -5 -10 -4 65.31 8.25
 -5 -10 -5 7.13 6.19
 5 -10 6 25.53 7.96
 -5 -10 -6 7.07 4.41
 5 -10 7 5.21 5.88
 -5 -11 9 14.16 5.85
 -5 -11 8 23.76 7.24
 -5 -11 8 20.53 6.09
 -5 -11 7 23.09 7.79
 -5 -11 7 32.71 7.16
 -5 -11 6 1.1 7.1
 -5 -11 5 52.92 7.9
 -5 -11 4 179.7 11.63
 -5 -11 4 -7.79 7.45
 -5 -11 3 99.19 12.41
 -5 -11 3 353.74 11.91
 -5 -11 2 95.39 8.46
 -5 -11 2 8.03 9.88
 -5 -11 1 128.71 11.36
 -5 -11 -1 71.53 8.45
 -5 -11 -2 3.2 6.5
 -5 -11 -3 2.84 5.54
 5 -11 5 41.8 5.48
 -5 -12 6 24.3 4.65
 -5 -12 5 -1.8 4.85
 -5 -12 4 8.98 5.26
 -5 -12 3 3.22 5.14
 -5 -12 2 47.67 5.63
 -5 -12 1 0.6 4.75
 -6 0 18 36.89 13.25
 -6 0 17 19.27 19.82
 -6 0 16 55.07 23.3
 -6 0 15 -3.23 25.11
 -6 0 14 105.99 24.82
 -6 0 13 16.62 23.69
 -6 0 12 291.98 29.67
 -6 0 11 -5.86 18.46
 -6 0 11 -4.14 24.27
 -6 0 10 169.86 17.8
 -6 0 10 167.09 21.67
 -6 0 9 2.74 14.13
 -6 0 9 9.63 16.64
 -6 0 8 893.02 30.15
 -6 0 8 950.18 32.44
 -6 0 7 -3.73 10.56
 -6 0 7 3.1 9.39
 -6 0 6 830.05 22.27
 6 0 -6 778.44 30.62
 -6 0 5 3.98 9.97
 6 0 -5 -3.72 10.49
 -6 0 5 -4.66 15.65
 -6 0 4 723.73 23.83
 6 0 -4 683.47 28.11
 -6 0 3 0.13 11.22
 6 0 -3 -3.24 8.91
 6 0 -2 633.82 29.09
 6 0 -2 659.86 25.51
 -6 0 1 3.94 13.03
 6 0 -1 0.16 11.11
 6 0 0 65.11 7.87
 -6 0 0 49.26 7.14
 6 0 1 2.59 8.25
 -6 0 -1 -0.1 5.87
 6 0 2 449.24 17.28
 6 0 2 409.22 19.89
 6 0 3 1.15 11.01
 6 0 3 8.88 14.71
 6 0 4 593.01 22.66
 6 0 4 596.03 26.05
 6 0 5 -6.84 13.41
 6 0 5 -8.3 18.29
 6 0 6 587.65 25
 6 0 6 546.45 28.09
 6 0 7 -0.93 16.23
 6 0 7 -25.33 20.6
 6 0 8 36.1 17.3
 6 0 8 29.3 20.6
 6 0 9 1.67 17.95
 6 0 9 -9.88 20.6
 6 0 10 17.82 19.62
 6 0 11 51.4 19.21
 6 0 12 4.74 13.74
 6 0 13 -0.24 6.82
 6 0 13 -7.04 8.34
 -6 1 18 12.78 10.97
 -6 -1 18 33.65 12.71
 -6 1 16 47.08 19.77
 -6 -1 16 58.19 21.97
 -6 1 15 -32.36 25.25
 -6 -1 15 64.38 25.16
 -6 1 14 47.25 23.66
 -6 -1 14 51.21 26.27
 -6 1 13 185.43 25.65
 -6 -1 13 188.71 27.5
 -6 1 12 265.78 28.37
 -6 1 11 325.04 25.76
 -6 -1 11 329.46 22.45
 -6 1 10 137.68 21.54
 -6 -1 10 126.78 16.86
 -6 -1 9 539.46 20.13
 -6 1 9 633.55 24.5
 -6 -1 8 -1.29 7.18
 -6 -1 8 5.94 11.47
 -6 1 8 6.31 15.09
 -6 -1 7 1479.55 32.69
 -6 -1 7 1438.22 31.69
 -6 -1 6 0.55 8.99
 6 1 -6 -1.79 11.94
 6 -1 -6 -8.67 11.49
 -6 -1 6 -1.29 13.82
 -6 1 6 -4.3 10.82
 -6 -1 6 3.22 6.68
 -6 -1 5 2381.34 65.71
 6 1 -5 2390.37 66.89
 -6 -1 5 2525.32 65.68
 6 1 -5 2339.51 74.36
 6 -1 -5 2417.74 74.08
 6 -1 -4 74.6 11.5
 -6 1 4 62.46 17.11
 -6 -1 4 74.14 9.79
 -6 1 4 79.86 12.4
 6 1 -4 70 12.31
 6 1 -4 89.97 6.97
 -6 -1 4 76.83 6.94
 -6 -1 3 1322.97 40.36
 6 -1 -3 1276.39 44.67
 -6 1 3 1373.3 42.19
 -6 1 3 1413.94 53.94
 6 1 -3 1396.7 40.28
 6 1 -3 1214.79 44.54
 -6 -1 2 65.68 11.55
 -6 1 2 71.99 13.17
 6 -1 -2 60.16 9.39
 6 -1 -2 46.75 11.41
 6 1 -2 60.84 5.85
 -6 1 2 87.91 18.48
 -6 -1 1 79.93 11.8
 6 -1 -1 79.36 9.22
 -6 1 1 78.39 14.85
 -6 1 1 78.81 7.72
 6 1 -1 85.49 7.23
 -6 1 1 86.39 17.36
 6 -1 -1 81.97 12.31
 6 -1 0 239.12 11.71
 6 1 0 232.99 14.71
 -6 1 0 210.07 12.25
 6 1 1 75.08 7.91
 6 -1 1 82.01 9.31
 -6 1 -1 64.96 7.96
 6 1 1 81.29 13.28
 6 1 2 19.99 8.58
 6 -1 2 32.13 10.64
 6 1 2 17.32 14.27
 6 1 3 249.5 13.53
 6 -1 3 286.47 15.71
 6 1 3 271.59 18.68
 6 -1 3 276.7 17.68
 6 1 4 8.2 11.45
 6 -1 4 17.5 14.52
 6 1 4 11.78 17.23
 6 -1 4 -0.28 15.79
 6 1 5 459.97 20.52
 6 -1 5 407.61 21.88
 6 1 5 402.74 24.13
 6 -1 5 393.32 16.96
 6 -1 5 418.45 22.99
 6 1 6 25.14 16.36
 6 -1 6 43.22 17.44
 6 1 6 54.89 21.55
 6 -1 6 33.22 19.04
 6 1 7 -1.04 16.87
 6 -1 7 -3.67 17.49
 6 1 7 0.08 20.39
 6 -1 7 -1.16 18.34
 6 1 8 455.25 23.26
 6 -1 8 486.46 23.92
 6 1 8 436.76 27.96
 6 -1 8 402.91 25.22
 6 1 9 121.82 18.97
 6 -1 9 85.76 19.24
 6 1 9 -4.22 23.52
 6 -1 9 41.52 19.48
 6 1 10 161.57 17.61
 6 -1 10 156.06 20.71
 6 1 10 122.33 21.63
 6 -1 11 368.39 20.58
 6 1 11 -25.75 18.27
 6 -1 12 62.01 11.2
 6 1 12 43.5 13.79
 6 -1 12 59.05 13.34
 6 1 13 1.64 6.68
 6 -1 13 3.75 6.48
 6 1 13 3.04 8.39
 -6 -2 18 11.65 11.22
 -6 2 16 31.15 18.44
 -6 2 15 11.9 22.86
 -6 2 14 62.22 23.11
 -6 2 13 308.15 25.04
 -6 -2 13 44.29 13.96
 -6 -2 12 295.39 27.84
 -6 2 12 268.64 24.01
 -6 -2 11 433.26 28.92
 -6 2 11 448.95 28.23
 -6 2 11 457.94 26.58
 -6 2 10 282.64 22.45
 -6 -2 10 237.91 23.26
 -6 2 10 254.58 23.63
 -6 -2 10 228.18 15.12
 -6 -2 10 252.15 16.83
 -6 2 9 222.94 17.29
 -6 -2 9 236.71 19.94
 -6 2 9 212.86 18.75
 -6 -2 9 184.79 13.18
 -6 -2 9 224.37 15.42
 -6 -2 8 75.48 11.74
 -6 2 8 76.89 13.65
 -6 -2 8 73.44 14.53
 -6 2 8 86.17 15.3
 -6 -2 8 84.05 9.88
 -6 -2 7 24.12 10.32
 -6 2 7 36.8 13.32
 -6 -2 7 24.59 13.67
 -6 -2 7 22.59 8.49
 -6 -2 6 320.43 13.98
 -6 2 6 343.51 16.83
 6 2 -6 326.68 15.29
 -6 -2 6 373.28 14.16
 -6 -2 5 1.86 8.13
 -6 2 5 -0.96 11.57
 6 -2 -5 4.67 9.71
 6 2 -5 2.46 5.89
 -6 -2 5 -1.89 6.81
 -6 -2 4 196.76 10.61
 -6 2 4 198.94 14.8
 6 -2 -4 181.95 14.89
 -6 2 4 174.12 17.71
 6 2 -4 203.52 11.14
 -6 -2 4 188.41 9.7
 -6 -2 3 317.11 13.92
 -6 2 3 364.19 18.52
 6 -2 -3 308.78 18.13
 6 2 -3 329.86 14.15
 -6 -2 3 320.23 12.6
 -6 -2 2 94.32 10.07
 -6 2 2 109.6 15.78
 -6 2 2 97.06 16.72
 6 2 -2 87.97 14.49
 6 -2 -2 74.45 11.5
 6 2 -2 95.89 8
 -6 2 1 50.62 14.83
 -6 -2 1 43.07 10.62
 -6 2 1 49.01 15.57
 6 -2 -1 51.55 11.04
 6 2 -1 47.43 6.48
 6 2 -1 35.2 11.53
 -6 2 1 45.52 6.65
 6 -2 0 186.91 15.14
 -6 -2 0 139.33 12.26
 6 2 0 150.79 15
 -6 2 0 114.08 9.2
 6 2 0 176.57 10.94
 6 2 1 106.83 8.6
 6 2 1 114.32 14.28
 -6 2 -1 88.15 8.43
 6 2 2 248.78 12.65
 6 2 2 276.2 18.11
 6 2 3 11.44 10.3
 6 -2 3 7.38 12.38
 6 2 3 19.12 16.34
 6 2 4 101.04 12.84
 6 -2 4 116.38 15.19
 6 -2 4 111.31 15.01
 6 2 4 117.44 19.56
 6 2 5 112.46 15.01
 6 -2 5 123.18 18.58
 6 -2 5 121.53 11.06
 6 2 5 139.03 22.29
 6 -2 5 103.81 17.55
 6 2 6 161.04 17.67
 6 -2 6 154.85 12.73
 6 -2 6 195.93 19.66
 6 2 6 176.17 23.53
 6 2 7 176.2 18.36
 6 -2 7 189.23 20.44
 6 2 7 184.58 23.67
 6 -2 7 183.02 13.28
 6 -2 7 141.75 19.4
 6 2 8 26.31 17.1
 6 -2 8 35.57 18.17
 6 2 8 23.43 23.2
 6 -2 8 42.07 18.13
 6 2 9 337.86 24.47
 6 -2 9 355 25.27
 6 2 10 18.7 15.82
 6 2 10 17.29 20.39
 6 -2 10 8.72 17.4
 6 2 11 145.4 15.62
 6 2 11 177.81 19.26
 6 -2 11 152.18 16.67
 6 -2 12 26.04 9.37
 6 2 12 17.42 13.09
 6 -2 12 11.42 10.89
 6 -2 13 10.69 5.45
 6 2 13 5.17 7.38
 -6 -3 18 45.36 9.46
 -6 -3 17 -13.16 13.47
 -6 -3 16 108.21 18.94
 -6 3 15 1.28 17.47
 -6 -3 15 11.9 20.91
 -6 3 14 175.67 21.08
 -6 -3 14 172.82 23.95
 -6 -3 14 156.47 15.96
 -6 3 13 45.23 19.77
 -6 -3 13 60.63 22.81
 -6 -3 13 50.55 15.03
 -6 3 12 278.12 24.46
 -6 -3 12 300.64 25.33
 -6 3 12 332.39 24.9
 -6 3 11 12.17 20.33
 -6 3 11 13.23 21.07
 -6 -3 11 16.83 15.78
 -6 3 10 17.82 20.42
 -6 -3 10 18.16 20.64
 -6 -3 9 -4.78 12.54
 -6 3 9 -28.86 16.81
 -6 -3 9 -11.66 18.33
 -6 3 9 -5.86 16.54
 -6 -3 9 2.72 12.4
 -6 -3 8 4.44 10.14
 -6 -3 8 -0.97 10.85
 -6 3 8 4.97 14.86
 -6 -3 8 2.05 15.12
 -6 3 8 6.49 14.37
 -6 -3 7 67.96 10.18
 -6 3 7 64.3 13.38
 -6 -3 7 71.46 14.12
 -6 -3 7 62.69 7.57
 -6 -3 7 65.02 9.83
 -6 -3 6 -3.88 9.03
 -6 3 6 -1.62 12.09
 -6 -3 6 2.99 12.31
 -6 -3 6 -2.19 8.47
 -6 -3 6 -3.28 6.16
 -6 -3 5 25.28 7.87
 -6 3 5 23.57 12.58
 6 3 -5 33.22 7.53
 6 3 -5 31.64 6.86
 -6 -3 5 28.37 8.03
 -6 -3 4 150.19 9.22
 -6 3 4 142.04 14.41
 6 3 -4 164.97 11.34
 -6 -3 4 156.46 9.34
 -6 -3 3 -1.67 7.19
 -6 3 3 -5.47 14.83
 6 -3 -3 -0.24 8.39
 6 3 -3 2.58 6.29
 -6 -3 3 2.22 6.46
 -6 3 2 61.82 16.56
 6 -3 -2 42.83 9.85
 6 3 -2 63.78 8.08
 -6 3 1 -11.06 17.86
 6 -3 -1 -0.89 8.71
 6 3 -1 -0.47 6.36
 6 -3 0 612.76 26.03
 6 3 0 589.61 23.37
 6 3 1 15.15 8.47
 6 3 1 31.66 15.19
 6 3 2 553.24 19.94
 6 3 2 573.88 25.55
 6 3 3 51.24 11.15
 6 3 3 53.03 18.53
 6 3 4 912.32 30.42
 6 3 4 890.32 35.75
 6 3 5 347.12 19
 6 -3 5 353.9 21.04
 6 3 5 356.84 26.4
 6 -3 5 312.38 15.28
 6 -3 5 327.48 19.8
 6 3 6 181.48 17.42
 6 -3 6 216.86 21.37
 6 -3 6 187.87 12.74
 6 -3 6 195.6 17.55
 6 3 6 145.18 24.38
 6 3 7 2.38 15.62
 6 -3 7 3.33 18.88
 6 -3 7 -3.72 10.36
 6 3 7 -7.12 23.28
 6 -3 7 -0.32 15.49
 6 3 8 87.78 17.44
 6 -3 8 60.68 11.43
 6 3 8 60.44 24.26
 6 -3 8 79.49 17.01
 6 3 9 47.38 17.37
 6 3 9 28.08 22.67
 6 -3 9 47.34 16.09
 6 3 10 23.27 15.35
 6 3 10 4.76 21.15
 6 -3 11 26.88 11.71
 6 3 11 24.64 16.63
 6 -3 11 21.06 13.11
 6 3 12 30.26 9.41
 6 -3 12 31.27 8.15
 6 3 12 11.48 11.42
 6 -3 12 16.27 8.07
 -6 -4 17 66.47 11.54
 -6 -4 16 55.99 15.86
 -6 -4 15 103.77 18.44
 -6 -4 15 87.99 13.93
 -6 -4 14 60.76 20.01
 -6 -4 14 117.39 18.06
 -6 -4 13 74.98 21.1
 -6 -4 13 62.23 16.82
 -6 4 12 18.62 17.46
 -6 -4 12 25.65 18.58
 -6 -4 12 36.24 16.48
 -6 4 11 -26.83 20.98
 -6 4 11 -35.72 19.31
 -6 -4 11 7.61 16.68
 -6 4 10 35.35 20.13
 -6 -4 10 27.09 19.07
 -6 4 10 81.61 20.68
 -6 -4 10 35.77 15.48
 -6 4 9 108.22 19.83
 -6 -4 9 184.37 19.31
 -6 4 9 162.96 18.44
 -6 -4 9 140.06 12.65
 -6 -4 9 107.9 16.18
 -6 4 8 156.97 18.02
 -6 -4 8 148.19 17.12
 -6 4 8 163.42 16.4
 -6 -4 8 176.79 12.17
 -6 -4 8 172.41 14.96
 -6 -4 8 152.98 12.51
 -6 4 7 -4.22 14.51
 -6 -4 7 4.17 13.27
 -6 4 7 2.7 12.58
 -6 -4 7 -2.38 10.19
 -6 -4 7 1.46 8.11
 -6 4 6 193.36 15.91
 -6 -4 6 204.34 14.98
 -6 -4 6 240.88 11.44
 -6 -4 6 229.17 13.14
 -6 4 5 10.11 12.75
 -6 -4 5 11.46 11.36
 -6 -4 5 15.32 9.02
 -6 -4 5 8.08 6.81
 -6 4 4 -0.93 13.46
 -6 -4 4 -2.51 7.72
 -6 4 3 35 15.35
 -6 -4 3 26.76 7.52
 -6 4 2 139.16 17.81
 -6 -4 2 157.27 9.55
 -6 4 1 1.52 18.53
 -6 4 0 62.39 21.63
 6 4 0 71.7 14.41
 6 4 1 67.66 9.83
 6 4 1 64.51 15.62
 6 4 2 69.37 10.95
 6 4 2 65.65 18.4
 6 4 3 250.4 14.61
 6 4 3 252.81 22.93
 6 4 4 25.76 13.28
 6 4 4 40.04 21.71
 6 4 5 6.31 14.22
 6 -4 5 -4.05 19.11
 6 -4 5 13.26 9.41
 6 4 6 5.62 14.51
 6 -4 6 16.65 17.79
 6 -4 6 3.05 9.78
 6 4 6 4.61 22.13
 6 -4 6 -4.07 13.56
 6 4 7 21.85 15.7
 6 -4 7 23.47 19.73
 6 -4 7 15.03 9.74
 6 4 7 22.71 23.22
 6 -4 7 24.23 14.07
 6 4 8 25.71 18.32
 6 -4 8 5.24 10.15
 6 4 8 -1.02 23.43
 6 -4 8 -6.25 14.99
 6 4 9 136.34 16.69
 6 4 9 109.55 23.29
 6 -4 9 83.87 10.91
 6 -4 9 75.18 15.09
 6 4 10 -18.17 14.73
 6 -4 10 -17.09 12.72
 6 4 10 -3.62 18.44
 6 -4 10 -1.18 12.74
 6 -4 11 65.11 10.3
 6 4 11 62.41 14.54
 6 -4 11 36.03 9.86
 6 -4 12 11.8 6.42
 6 4 12 -0.21 8.27
 -6 -5 16 19.64 10.26
 -6 -5 15 82.42 14.45
 -6 -5 15 183 15.61
 -6 -5 14 28.37 16.21
 -6 -5 14 29.64 14.17
 -6 -5 13 113.79 18.84
 -6 -5 13 98.36 17.97
 -6 -5 12 46.62 17.75
 -6 -5 12 43.48 16.4
 -6 5 11 40.91 18.1
 -6 -5 11 16 15.98
 -6 -5 11 48.47 17.25
 -6 -5 11 21.86 12.09
 -6 5 10 70.89 19.03
 -6 -5 10 32.69 17.51
 -6 -5 10 35.08 12.85
 -6 -5 10 41.42 16.42
 -6 5 9 440.58 23.95
 -6 -5 9 465.38 24
 -6 -5 9 474.82 20.74
 -6 -5 8 33.94 15.72
 -6 -5 8 55.26 13.69
 -6 -5 8 36.73 14.79
 -6 -5 7 439.68 20.36
 -6 -5 7 454.38 18.63
 -6 -5 7 402.02 19.3
 -6 5 6 4.13 13.57
 -6 -5 6 10.27 12.8
 -6 -5 6 -15.85 14.04
 -6 -5 6 9.11 9.77
 -6 -5 5 160.48 13.15
 -6 -5 5 152.59 10.73
 -6 -5 5 174.84 13.35
 -6 5 4 -9.39 10.26
 -6 -5 4 7.33 10.72
 -6 -5 4 -1.35 9.79
 -6 5 3 40.5 12.77
 -6 -5 3 382.17 13.26
 -6 5 2 99.3 9.5
 -6 5 2 23.36 16.14
 -6 5 1 580.29 33.44
 -6 5 1 899.75 26.14
 -6 5 0 17.16 23.3
 -6 5 -1 912.45 40.5
 6 5 2 16.31 11.41
 6 5 2 19.85 18.05
 6 5 3 136.08 13.85
 6 5 3 97.69 22.21
 6 5 4 81.56 14.09
 6 5 4 67.55 23.03
 6 5 5 101.16 14.61
 6 -5 5 94.13 9.79
 6 5 5 115.53 22.38
 6 5 6 290.49 18.6
 6 -5 6 337.74 21.94
 6 5 6 276.53 26.52
 6 -5 6 315.17 14.12
 6 5 7 26.37 15.66
 6 -5 7 30.98 9.81
 6 5 8 103.46 16.31
 6 -5 8 78.71 10.04
 6 5 8 116.69 22.63
 6 5 9 271.68 21.89
 6 -5 9 8.6 8.78
 6 -5 10 27.83 10.87
 6 -5 11 2.34 7.83
 -6 -6 15 14.24 9.03
 -6 -6 15 1.38 10.24
 -6 -6 14 34.73 11.52
 -6 -6 14 69.82 16.21
 -6 -6 13 -1.39 12.89
 -6 -6 13 8.91 14.42
 -6 -6 12 92.43 15.11
 -6 -6 12 92.78 12.83
 -6 -6 12 108.82 17.08
 -6 -6 11 15.89 14.41
 -6 -6 11 9.52 12.55
 -6 -6 11 12.15 15.68
 -6 -6 10 152.36 16.19
 -6 -6 10 190.48 14.88
 -6 -6 10 197.38 18.13
 -6 6 10 187.5 17.23
 -6 -6 9 7.88 13.49
 -6 -6 9 -0.06 12.51
 -6 -6 9 3.44 14.65
 -6 6 8 409.71 22.25
 -6 -6 8 425.75 20.89
 -6 -6 8 451.01 21.37
 -6 6 7 14.87 14.84
 -6 -6 7 13.71 12.84
 -6 6 6 128.39 15.77
 -6 -6 6 101.48 12.05
 -6 -6 6 91.05 13.94
 -6 6 5 -2.78 13.42
 -6 -6 5 11.58 11.22
 -6 6 4 108.49 13.7
 -6 -6 4 89.58 11.93
 -6 6 3 11.27 12.63
 -6 6 3 61.43 12.36
 -6 6 2 335.79 14.5
 -6 -6 2 307.52 15.22
 -6 6 1 205.74 12.08
 -6 -6 1 200.28 12.99
 -6 6 0 584.45 33.21
 -6 6 0 633.78 21.47
 -6 -6 0 658.63 23.29
 -6 6 -1 13.31 25.24
 -6 6 -3 54.99 25.3
 6 6 5 36.47 21.07
 6 -6 5 28.57 8.86
 6 -6 6 332.27 21.08
 6 6 6 324.82 25.37
 6 -6 6 309.2 13.79
 6 -6 7 15.43 9.03
 6 -6 8 42.81 8.31
 -6 6 -9 -6.08 12.45
 6 -6 9 -16.96 11.25
 -6 6 -10 3.04 8.44
 6 -6 10 2.92 7.85
 -6 -6 -10 -1.74 4.36
 6 -6 11 6.98 4.79
 -6 -7 14 21.98 10.91
 -6 -7 13 13.95 12.71
 -6 -7 12 18.91 11.06
 -6 -7 12 17.05 14.64
 -6 -7 11 82.12 13.02
 -6 -7 11 80.97 15.24
 -6 -7 10 51.21 16.54
 -6 -7 10 3.1 12.86
 -6 -7 9 175.59 14.21
 -6 -7 9 137.56 16.73
 -6 -7 8 4.61 12.67
 -6 -7 7 133.69 14.15
 -6 -7 6 -7.1 12
 -6 -7 5 120.96 12.31
 -6 -7 4 -3.48 12.09
 -6 -7 4 -16.95 11.81
 -6 -7 3 256.34 15.79
 -6 -7 3 281.79 16.98
 -6 7 2 -12.69 13.99
 -6 7 2 2.06 11.67
 -6 -7 2 -10.95 11.92
 -6 7 1 749.56 23.94
 -6 -7 1 697.23 24.51
 -6 7 0 58.35 9.1
 -6 7 0 50.51 17.3
 -6 -7 0 73.29 11.6
 -6 -7 -1 13.49 10.22
 -6 7 -2 -0.08 18.84
 -6 -7 -2 10.23 9.96
 -6 7 -3 38.96 19.94
 -6 -7 -3 12.06 9.4
 -6 7 -4 39.8 18.05
 -6 -7 -4 20.6 9.56
 -6 7 -5 40.81 17.64
 -6 -7 -5 53.79 10.4
 -6 7 -6 60.59 15.96
 -6 -7 -6 54.3 9.1
 -6 -7 -7 107.19 9.16
 -6 7 -7 109.51 13.99
 -6 7 -8 84.56 11.6
 -6 -7 -8 97.1 7.5
 6 -7 9 5.49 8.28
 6 -7 10 37.19 5.59
 -6 -8 14 8.55 6.86
 -6 -8 13 14.98 9.63
 -6 -8 12 -22.85 12.28
 -6 -8 11 98.26 13.65
 -6 -8 11 17.49 11.09
 -6 -8 10 63.84 12.36
 -6 -8 9 78.34 13.21
 -6 -8 8 807.09 29.38
 -6 -8 7 38.02 13.24
 -6 -8 7 30.06 14.21
 -6 -8 6 26.23 13.3
 -6 -8 6 0.05 11.95
 -6 -8 5 8.51 11.63
 -6 -8 5 0.05 12.2
 -6 -8 4 19.66 11.95
 -6 -8 4 24.27 11.28
 -6 8 3 7.07 12.85
 -6 -8 3 3.98 11.8
 -6 -8 3 6.7 11.32
 -6 8 2 122.54 13.11
 -6 -8 2 121.18 12.61
 -6 -8 2 114.38 13.01
 -6 8 1 -1.3 9.9
 -6 -8 1 9.9 11.11
 -6 8 0 292.05 13.98
 -6 -8 0 325.61 15.56
 -6 -8 -1 4.58 9.59
 -6 -8 -2 -0.54 9.43
 -6 -8 -3 42.14 9.28
 -6 -8 -4 8.17 8.64
 -6 -8 -5 79.77 8.79
 -6 -8 -6 -9.6 7.09
 -6 -8 -7 71.97 6.35
 6 -8 8 10.68 8.11
 6 -8 9 68.71 5.5
 -6 -9 12 8.85 5.49
 -6 -9 11 6.11 8.24
 -6 -9 10 221.28 14.51
 -6 -9 10 12 9.77
 -6 -9 9 197.47 14.23
 -6 -9 9 -24.08 13.18
 -6 -9 8 35.12 11.48
 -6 -9 8 33.39 12.33
 -6 -9 7 17.61 10.99
 -6 -9 7 16.38 12.82
 -6 -9 6 3.69 11.44
 -6 -9 6 5.59 11.25
 -6 -9 5 -0.05 11.46
 -6 -9 5 -2.39 12.05
 -6 -9 4 0.33 11.36
 -6 -9 3 7.94 10.93
 -6 -9 3 -3.29 10.93
 -6 -9 2 40.69 10.11
 -6 -9 1 1.7 10.05
 -6 -9 0 103.93 10.67
 -6 -9 -1 1.45 9.22
 -6 -9 -1 -7.63 10.38
 -6 -9 -2 181.43 12.39
 -6 -9 -2 162.6 10.9
 -6 -9 -3 12.15 7.58
 -6 -9 -4 29.5 7.43
 -6 -9 -5 5.3 5.76
 -6 -9 -5 8.59 7.91
 -6 -9 -6 53.25 6.68
 6 -9 7 0.68 6.7
 -6 -9 -7 2.04 3.75
 -6 -10 11 5.34 5.43
 -6 -10 10 22.21 6.82
 -6 -10 10 22.98 7.18
 -6 -10 9 29.91 8.1
 -6 -10 9 41.75 8.67
 -6 -10 8 41.77 8.78
 -6 -10 8 48.09 9.41
 -6 -10 7 46.01 10.09
 -6 -10 7 40.83 10.45
 -6 -10 6 33.43 9.83
 -6 -10 6 22.13 10.33
 -6 -10 5 19.05 10.15
 -6 -10 4 125.88 11.8
 -6 -10 4 45.57 9.83
 -6 -10 3 -7.86 8.95
 -6 -10 2 75.44 9.38
 -6 -10 1 2.55 7.92
 -6 -10 1 2.88 10.33
 -6 -10 0 6.53 8.3
 -6 -10 0 33.42 9.26
 -6 -10 -1 49.3 7.46
 -6 -10 -2 0.07 8.49
 -6 -10 -3 60.29 7.64
 -6 -10 -4 10.82 5.7
 -6 -10 -5 13.73 4.28
 -6 -11 8 3.68 5
 -6 -11 7 28.62 6.23
 -6 -11 7 22.85 5.88
 -6 -11 6 12.88 6.59
 -6 -11 6 8.63 6.13
 -6 -11 5 48.38 6.79
 -6 -11 4 2.66 6.16
 -6 -11 3 98.04 7.28
 -6 -11 2 1.25 5.41
 -6 -11 2 -3.29 7.3
 -6 -11 1 59.48 7.78
 -6 -11 0 4.14 6.51
 -6 -11 -1 48.28 6.19
 -6 -11 -2 0.27 4.76
 6 -11 3 21.43 5.69
 -7 0 18 22.51 11.25
 -7 0 17 -0.39 16.75
 -7 0 16 679.84 34.08
 -7 0 15 -1.37 24.55
 -7 0 14 146.37 26.15
 -7 0 13 24.94 26.05
 -7 0 12 78.32 21.16
 -7 0 12 84.29 25.88
 -7 0 11 79.15 22.07
 -7 0 11 229.2 28.83
 -7 0 10 20.61 17.82
 -7 0 10 29.72 24.43
 -7 0 9 7.81 16.13
 -7 0 9 536.97 26.47
 -7 0 8 729.2 27.71
 -7 0 8 818.73 31.32
 -7 0 7 4.97 13.55
 -7 0 6 1401.14 43.29
 -7 0 5 -3.45 11.88
 -7 0 4 2371.68 69.26
 -7 0 3 1.94 13.7
 -7 0 2 629.61 25.63
 -7 0 1 2.74 15.44
 -7 0 0 498.04 24.51
 7 0 1 -3.89 8.88
 7 0 2 232.67 12.86
 7 0 3 -6.49 11.3
 7 0 3 1.75 16.17
 7 0 4 76.4 13.13
 7 0 4 92.39 17.89
 7 0 5 14.08 13.59
 7 0 5 -3.23 16.87
 7 0 6 104.49 15.44
 7 0 6 81.02 17.52
 7 0 7 -9.64 14.73
 7 0 7 -2.42 17.5
 7 0 8 1.89 17.58
 7 0 9 1.15 14
 7 0 9 -1.2 15.68
 7 0 10 -5.78 12.4
 7 0 10 -19.18 14.27
 7 0 11 -4.92 9.02
 7 0 11 -8.79 10.44
 7 0 12 8.62 5.49
 -7 -1 18 8.54 10.73
 -7 1 17 29.73 15.76
 -7 -1 17 43.28 16.88
 -7 1 16 244.61 27.71
 -7 -1 16 53.77 22.24
 -7 1 15 144.59 23.99
 -7 -1 15 165.44 25.57
 -7 -1 14 -6.83 25.09
 -7 -1 13 174.05 28.1
 -7 1 13 172.81 26.31
 -7 1 12 -23.55 24.85
 -7 1 11 349.56 31.84
 -7 -1 11 712.3 29.02
 -7 -1 10 14.8 17.55
 -7 1 10 12.37 22.6
 -7 -1 9 650.66 28.18
 -7 1 9 1030.93 34.89
 -7 -1 8 32.78 13.63
 -7 1 8 31.95 19.25
 -7 -1 7 944.25 29.6
 -7 1 7 879.41 30.55
 -7 -1 6 -3.24 11.61
 -7 1 6 3.28 13.44
 -7 -1 6 -0.96 7.57
 -7 -1 5 643.34 23.66
 -7 1 5 719.38 26.28
 -7 -1 5 657.59 22.18
 -7 -1 4 66.89 11.87
 -7 1 4 55.26 15.66
 -7 -1 4 59.07 7.97
 -7 -1 3 484.57 20.65
 -7 1 3 556.94 24.54
 -7 -1 2 67.76 13.97
 -7 1 2 75.41 18.47
 -7 -1 1 39.03 14.51
 -7 1 1 32.99 17.03
 -7 -1 0 827.86 29.29
 -7 1 0 838.8 32.69
 7 -1 0 741.72 25.22
 7 1 1 103.72 9.79
 7 -1 1 111.55 11.7
 7 1 1 114.96 16.06
 7 1 2 254.71 13.66
 7 -1 2 272.27 15.38
 7 1 2 279.45 18.51
 7 1 3 27.9 11.52
 7 -1 3 42.07 13.25
 7 1 3 16.41 16.76
 7 1 4 192.56 15.06
 7 -1 4 210.66 16.06
 7 1 4 194.27 20.3
 7 -1 4 192.38 17.91
 7 1 5 19.66 13.7
 7 -1 5 -10.96 13.95
 7 -1 5 -0.39 15.81
 7 1 6 14.27 13.77
 7 -1 6 2.66 13.98
 7 1 6 4.79 17.51
 7 -1 6 -3.26 15.75
 7 1 7 24.88 14.73
 7 -1 7 14.89 15.09
 7 1 7 23 18.28
 7 -1 7 31.92 16.53
 7 1 8 71.09 15.37
 7 -1 8 82.13 16.15
 7 1 8 74.71 19.1
 7 -1 8 67.24 16.31
 7 1 9 45.6 14.63
 7 -1 9 55.15 15.03
 7 1 9 56.6 17.53
 7 -1 9 31.47 15.45
 7 1 10 88.21 12.93
 7 -1 10 82.65 13.13
 7 1 10 34.58 14.48
 7 -1 10 46.34 13.39
 7 1 11 14.64 8.77
 -7 -1 -11 8.83 6.46
 7 -1 11 15.12 8.81
 7 1 11 7.68 10.79
 7 -1 11 13.57 9.06
 7 1 12 4.81 5.35
 -7 2 17 -6.99 11.74
 -7 2 16 155.98 21.09
 -7 2 15 6.9 20.53
 -7 2 14 15.12 23.53
 -7 2 13 15.57 23.1
 -7 -2 13 -1.8 25.87
 -7 2 12 38.25 22.73
 -7 -2 12 47.38 24.53
 -7 2 12 48.63 22.44
 -7 -2 11 20.38 16.47
 -7 2 11 16.59 22.51
 -7 -2 11 4.18 23.78
 -7 -2 11 -4.2 12.61
 -7 2 10 112.75 21.51
 -7 2 10 165.89 23.23
 -7 -2 10 131.84 22.78
 -7 -2 10 141.43 15.65
 -7 -2 10 173.16 17.36
 -7 -2 9 90.94 14.59
 -7 2 9 99.26 20.9
 -7 -2 9 111.75 21.5
 -7 -2 9 67.9 12.35
 -7 -2 8 116.72 13.75
 -7 2 8 61.85 18.05
 -7 -2 8 100.36 18.1
 -7 2 8 116.44 20.29
 -7 -2 8 109.17 11.01
 -7 -2 7 41.79 11.89
 -7 2 7 34.99 16.71
 -7 -2 7 38.05 9.67
 -7 -2 6 389.18 17.39
 -7 2 6 416.15 21.79
 -7 -2 6 440.96 17.17
 -7 -2 5 140.52 11.49
 -7 2 5 137.72 16.85
 -7 -2 5 152.79 10.08
 -7 -2 4 156.12 11.81
 -7 -2 4 168.63 10.28
 -7 -2 3 28.26 10.49
 -7 -2 3 27.11 7.38
 -7 -2 2 32.37 11.83
 -7 -2 1 512.86 20.86
 -7 -2 0 31.53 13.34
 7 -2 0 29.26 9.87
 7 2 0 36.02 14.02
 7 2 1 688.41 23.57
 -7 -2 -1 773.51 26.76
 7 -2 1 720.95 24.84
 7 2 1 806.85 28.77
 7 2 2 4.59 9.65
 7 -2 2 1.13 12.22
 7 2 2 -4.28 16.24
 7 2 3 687.76 24.95
 7 -2 3 761.35 27.45
 7 2 3 723.58 30.08
 7 2 4 7.21 11.8
 7 -2 4 2.96 16.11
 7 2 4 1.83 18.52
 7 2 5 20.25 13.05
 7 -2 5 41.97 15.23
 7 2 5 22.01 18.34
 7 -2 5 23.64 14.84
 7 2 6 4.95 13.46
 7 -2 6 14.05 14.48
 7 2 6 19.58 18.4
 7 -2 6 14.72 14.54
 7 2 7 269.17 17.99
 7 -2 7 226.95 18.23
 7 2 7 260.3 22.3
 7 -2 7 268.75 18.54
 7 2 8 -3.81 14.1
 7 -2 8 6.12 14.49
 7 2 8 11.82 18.4
 7 -2 8 -0.75 14.63
 7 2 9 312.98 17.58
 7 -2 9 269.51 18.56
 7 2 9 304.47 20.29
 7 -2 9 291.43 17.45
 7 2 10 5.26 11.37
 7 2 10 -14.82 15.79
 7 2 11 130.06 9.82
 7 2 11 96.24 11.66
 -7 -3 17 25.29 12.14
 -7 -3 16 32.22 16.97
 -7 3 15 -2.23 15.72
 -7 3 14 8 18.85
 -7 -3 14 -12.42 22.25
 -7 3 13 -0.37 19.04
 -7 -3 13 0.08 21.8
 -7 -3 13 11.7 13.56
 -7 3 12 22.09 22.31
 -7 3 12 15.12 20.66
 -7 -3 12 30.66 22.86
 -7 -3 12 13.96 13.83
 -7 3 11 4.58 20.78
 -7 -3 11 0.08 22.05
 -7 -3 11 11.73 15.19
 -7 3 10 23.41 21.89
 -7 -3 10 5.12 14.86
 -7 -3 9 18.92 13.22
 -7 3 9 17.2 20.57
 -7 -3 9 21.04 18.68
 -7 -3 8 33.98 12.09
 -7 3 8 6.98 19.37
 -7 -3 8 53.62 18.54
 -7 3 8 -24.16 19.87
 -7 -3 8 9.92 13.32
 -7 -3 7 0.19 10.81
 -7 -3 7 -3.15 16.13
 -7 -3 7 4.26 11.74
 -7 -3 6 119.91 11.17
 -7 3 6 118.05 17.9
 -7 -3 6 142.99 12.23
 -7 -3 5 -2.47 8.99
 -7 3 5 -0.65 15.75
 -7 -3 5 8.19 8.82
 -7 -3 4 1115.78 34.98
 -7 3 4 1214.45 40.21
 -7 -3 4 1195.3 35.91
 -7 -3 3 141.51 10.65
 -7 3 3 165.64 21.22
 -7 -3 3 136.43 9.99
 -7 -3 2 586.01 20.93
 -7 3 2 732.34 31.9
 -7 -3 1 1.15 9.86
 -7 3 1 10.71 22.41
 -7 3 0 1028.91 40.31
 7 3 0 963.02 32.64
 -7 -3 -1 26.48 12.07
 7 3 1 22.19 15.65
 7 3 2 314.47 15.61
 -7 -3 -2 380.94 17.09
 7 3 2 336.17 22.68
 7 3 3 129.88 12.7
 -7 -3 -3 136.79 13.55
 7 -3 3 156.41 16.2
 7 3 3 156.23 20.24
 -7 -3 -4 78.43 11.95
 7 3 4 65.56 12.78
 7 -3 4 83.16 15.9
 7 3 5 4.2 12.37
 7 -3 5 2.03 16.07
 7 3 5 -5.14 18.9
 7 3 6 159.59 14.76
 7 -3 6 166.78 17.71
 7 3 6 155.31 20.9
 7 3 7 3.93 13.77
 7 -3 7 -28.99 16.39
 7 3 7 25.02 20.12
 7 3 8 165.08 15.35
 7 -3 8 164.12 15.74
 7 3 8 149.64 20.27
 7 3 9 17.6 13.24
 7 -3 9 -18.58 13.83
 7 3 10 164.43 12.2
 7 -3 10 176.75 11.54
 7 3 11 -3.48 7.98
 -7 -4 17 1.81 8.71
 -7 -4 16 58.17 13.45
 -7 -4 15 31.28 17.31
 -7 -4 14 11.99 18.68
 -7 -4 14 18.84 13.59
 -7 -4 13 -6.27 19.51
 -7 -4 13 33.25 14.83
 -7 4 12 2.44 19.91
 -7 4 12 3.62 16.76
 -7 -4 12 -6.97 20.29
 -7 -4 12 3.35 14.92
 -7 4 11 -0.82 20.38
 -7 -4 11 0.68 20.31
 -7 4 11 -16.44 18.03
 -7 -4 11 3.23 15.17
 -7 -4 10 113.34 19.08
 -7 4 10 72 18.33
 -7 -4 10 72.48 16.05
 -7 -4 9 74.88 18.58
 -7 4 9 45.63 17.52
 -7 4 8 74.13 19.82
 -7 -4 8 113.77 17.88
 -7 -4 8 90.37 15
 -7 4 7 -9.02 18.39
 -7 -4 7 8.16 16.01
 -7 4 7 2.54 14.56
 -7 -4 7 -5.54 13.9
 -7 -4 7 12.98 10.04
 -7 4 6 191.45 20.24
 -7 -4 6 97.37 14.56
 -7 -4 6 103.47 10.48
 -7 -4 6 202.34 15.33
 -7 4 5 116.55 19.27
 -7 -4 5 155.5 10.61
 -7 -4 5 125.79 13.33
 -7 4 4 40.68 18.99
 -7 -4 4 35.36 11.34
 -7 4 3 286.38 23.89
 -7 -4 3 321.98 15.46
 -7 4 2 66.71 22.17
 -7 -4 2 9.55 11.44
 -7 4 1 -22.57 27.39
 -7 4 0 -10.13 28.67
 -7 4 -1 2.81 27.9
 7 4 1 3.44 14.83
 7 4 2 57.95 10.61
 7 4 2 24.19 16.49
 7 4 3 213.02 13.73
 7 4 3 253.39 20.62
 7 4 4 500.58 20.63
 7 -4 4 538.23 23.32
 7 4 4 552.43 27.25
 7 4 5 436.19 19.79
 7 -4 5 509.34 23.37
 7 4 5 473.21 26.43
 7 4 6 53.6 13.08
 7 4 6 4.81 21.45
 7 4 7 292.69 16.99
 7 -4 7 314.74 19.48
 7 4 7 306.93 23.23
 7 4 8 -1.92 12.12
 7 4 8 14.01 17.12
 7 -4 9 384.54 16.41
 7 4 9 341.32 19.37
 -7 4 -10 -4.36 10.22
 7 4 10 -4.2 10.25
 -7 4 -11 3.7 5.92
 -7 -5 16 15.88 8.57
 -7 -5 15 57.09 12.36
 -7 -5 15 38.64 10.56
 -7 -5 14 18.04 14.43
 -7 -5 14 31.6 13.41
 -7 -5 13 182.27 18
 -7 -5 13 184.98 17.32
 -7 -5 12 -10.03 16.26
 -7 -5 12 81.59 17.41
 -7 -5 11 258.81 19.6
 -7 -5 11 242.68 19.2
 -7 5 11 227.16 20.63
 -7 5 10 19.33 16.84
 -7 -5 10 25.34 16.24
 -7 -5 10 17.88 15.17
 -7 5 9 305.13 20.86
 -7 -5 9 438.63 21.24
 -7 -5 9 253.93 17.78
 -7 -5 9 465.95 20.61
 -7 -5 8 4.31 14.79
 -7 -5 8 8.24 11.69
 -7 -5 8 -6.79 14.52
 -7 -5 7 358.43 18.53
 -7 -5 7 400.83 16.98
 -7 -5 7 406.1 19.3
 -7 5 6 -4.68 14.86
 -7 -5 6 10.71 13.4
 -7 -5 6 17.37 13.91
 -7 -5 6 23.43 10.91
 -7 -5 5 181.52 14
 -7 -5 5 197.02 14.69
 -7 -5 4 3.34 11.6
 -7 -5 4 17.09 12.35
 -7 5 3 84.82 22.52
 -7 -5 3 294.07 14.97
 -7 5 2 95.07 24.78
 -7 -5 2 147.84 13.37
 -7 5 1 4.8 25.39
 -7 -5 1 -20.24 12.52
 -7 5 0 566.3 36.49
 -7 5 -1 104.56 30.57
 -7 5 -2 937.56 41.25
 -7 5 -3 153.72 26.89
 7 5 3 133.66 18.68
 7 -5 4 354.41 19.86
 7 5 4 316.8 22.2
 7 5 4 343.11 16.63
 7 5 5 36.02 12.45
 7 5 6 77.79 13.08
 7 -5 6 72.23 16.26
 7 5 6 57.7 18.59
 7 -5 7 -3.57 14.53
 7 5 7 -7.28 16.87
 -7 5 -8 2.72 15.27
 7 -5 8 -14.12 12.3
 7 5 8 16.76 14.71
 -7 5 -9 88.47 12.51
 -7 5 -10 -1.11 7.27
 -7 -5 -10 -1.18 4.14
 -7 -6 14 51.25 10.76
 -7 -6 14 290.41 14.22
 -7 -6 13 1.42 11.91
 -7 -6 12 191.62 15.87
 -7 -6 12 194.17 16.61
 -7 -6 11 -0.11 12.99
 -7 -6 11 4.3 15.6
 -7 -6 10 511.15 19.31
 -7 -6 10 507.82 22.32
 -7 6 9 29.44 14.8
 -7 -6 9 55.88 13.61
 -7 -6 9 64.21 11.83
 -7 -6 9 59.73 15.37
 -7 -6 8 158.39 14.37
 -7 -6 8 201.54 14.02
 -7 -6 8 173.19 14.8
 -7 -6 7 1.6 13.63
 -7 -6 7 0.32 11.52
 -7 6 6 69.44 14.17
 -7 -6 6 -4.71 13.66
 -7 -6 5 8.23 12.79
 -7 -6 5 27.94 11.93
 -7 -6 4 158.28 13.07
 -7 -6 4 130.19 14.89
 -7 6 3 -5.17 15.91
 -7 6 2 441.1 25.65
 -7 6 1 141.47 23.86
 -7 6 0 551.13 30.82
 -7 -6 0 476.77 20.16
 -7 6 -1 19.72 23.6
 -7 -6 -1 23.89 10.98
 -7 6 -2 166.32 25.88
 -7 -6 -2 103.62 12.08
 -7 6 -3 18.5 22.48
 -7 -6 -3 0.05 10.27
 -7 6 -4 23.55 20.89
 -7 6 -5 17.33 20.02
 7 -6 5 10.87 14.53
 -7 6 -6 22.2 16.81
 7 -6 6 5.37 15.15
 7 -6 7 6.43 11.83
 -7 -6 -7 0.93 8.44
 -7 6 -8 10.89 10.8
 7 -6 8 26.55 9.69
 -7 -6 -8 10.35 6.57
 -7 6 -9 -0.54 6.72
 -7 -6 -9 1.88 4.34
 -7 -7 14 5.54 8.51
 -7 -7 13 3.43 10.75
 -7 -7 11 132.39 11.4
 -7 -7 11 150.03 15.29
 -7 -7 10 19.29 10.94
 -7 -7 10 33.83 14.62
 -7 -7 9 439.75 19.24
 -7 -7 9 452.31 21.59
 -7 -7 8 68.07 12.38
 -7 -7 8 46.69 14.62
 -7 -7 7 8.3 14.46
 -7 -7 7 8.53 11.78
 -7 7 6 53.81 12.87
 -7 -7 6 59.55 11.56
 -7 7 5 15.26 12.61
 -7 -7 5 6.54 10.62
 -7 7 4 -6.34 12.92
 -7 -7 4 -0.05 10.19
 -7 7 3 39.3 13.83
 -7 -7 3 55.08 11.49
 -7 7 2 13.21 15.09
 -7 -7 2 11.4 12.11
 -7 7 1 275.05 19.28
 -7 -7 1 304.92 16.03
 -7 7 0 20.45 16.49
 -7 -7 0 27.76 11.25
 -7 7 -1 15.87 17.05
 -7 -7 -1 4.64 10.83
 -7 7 -2 122.28 18.33
 -7 -7 -2 39.51 14.85
 -7 7 -3 -28.06 17.96
 -7 -7 -3 -3.87 10.19
 -7 7 -4 67.35 16.21
 -7 -7 -4 64.06 9.77
 -7 7 -5 -4.32 14.04
 -7 -7 -5 -5.3 8.58
 7 -7 6 59.01 13.22
 -7 -7 -6 43.03 7.92
 7 -7 7 3.47 9.36
 -7 -7 -7 0.27 5.8
 -7 -7 -8 36 4.37
 -7 -8 13 -1.17 7.51
 -7 -8 12 6.67 9.83
 -7 -8 11 60.17 9.48
 -7 -8 11 81.58 12.95
 -7 -8 10 28.24 9.86
 -7 -8 10 57.18 13.23
 -7 -8 9 11.37 10.38
 -7 -8 9 22.01 12.84
 -7 -8 8 34.36 10.76
 -7 -8 7 17.81 12.08
 -7 -8 5 85.97 12.54
 -7 -8 5 19.57 12.62
 -7 -8 4 72.27 12.15
 -7 -8 4 95.88 13.79
 -7 -8 3 73.22 13.57
 -7 -8 3 28.53 10.96
 -7 -8 2 29.41 11.95
 -7 -8 2 37.57 11.04
 -7 -8 1 -12.01 11.04
 -7 -8 0 -15.04 11.14
 -7 -8 -1 172.55 12.13
 -7 -8 -2 -0.8 8.83
 -7 -8 -3 113.57 9.86
 7 -8 4 -1.91 11.85
 7 -8 5 113.35 11.47
 -7 -8 -5 123.9 8.38
 7 -8 6 3.08 9.25
 -7 -8 -6 4.15 5.14
 7 -8 7 34.25 6.33
 -7 -9 12 6.43 5.88
 -7 -9 10 18.4 7.59
 -7 -9 9 15.93 9.02
 -7 -9 8 -22.72 11.58
 -7 -9 7 54.04 12.75
 -7 -9 7 -23.3 12.14
 -7 -9 6 96.45 11.02
 -7 -9 6 23.27 12.33
 -7 -9 5 5.25 10.35
 -7 -9 5 -2.42 10.17
 -7 -9 4 150.87 12.09
 -7 -9 4 171.72 12.38
 -7 -9 3 4.31 9.61
 -7 -9 3 -7.81 9.68
 -7 -9 2 131.64 11.53
 -7 -9 2 132.19 11.24
 -7 -9 1 5.11 9.28
 -7 -9 1 -10.62 9.54
 -7 -9 0 27.78 9.32
 -7 -9 -1 197.77 13.83
 -7 -9 -2 774.32 16.32
 -7 -9 -2 56.4 10.16
 -7 -9 -3 14.94 7.03
 -7 -9 -3 -2.83 7.08
 7 -9 4 57.6 9.08
 -7 -9 -4 38.94 7.06
 -7 -9 -4 44.67 5.87
 7 -9 5 7.39 7.29
 -7 -9 -5 2.36 4.93
 7 -9 6 32.3 5.07
 -7 -10 10 24.29 5.34
 -7 -10 9 4.85 5.2
 -7 -10 9 9.64 6.53
 -7 -10 8 12.85 6.28
 -7 -10 8 9.42 7.43
 -7 -10 7 1.14 7.06
 -7 -10 7 -2.38 7.93
 -7 -10 6 15.24 7.79
 -7 -10 6 8.23 8.26
 -7 -10 5 8.09 8
 -7 -10 5 12.08 8.48
 -7 -10 4 -11.44 8.22
 -7 -10 4 -6.91 8.15
 -7 -10 3 32.43 8.56
 -7 -10 3 20.22 8.3
 -7 -10 2 11.54 7.78
 -7 -10 2 0.99 7.73
 -7 -10 1 34.96 7.2
 -7 -10 0 5.39 6.28
 -7 -10 -1 23.17 5.42
 -7 -10 -1 17.19 6.53
 -7 -10 -2 11.35 5.72
 7 -10 3 8.51 6.4
 -7 -10 -3 5.85 4.51
 -7 -11 6 -1.47 4.2
 -7 -11 5 16.45 4.87
 -7 -11 4 3.2 4.81
 -7 -11 1 10.12 4.61
 -7 -11 0 5.09 4.07
 -8 0 17 6.49 14.33
 -8 0 16 254.35 22.6
 -8 0 14 65.55 25.71
 -8 0 13 17.84 26.75
 -8 0 12 18.94 19.57
 -8 0 12 25.45 24.82
 -8 0 11 6.35 19.22
 -8 0 11 19.03 23.14
 -8 0 10 28.43 18.92
 -8 0 10 32.69 25.06
 -8 0 8 1034.73 36.95
 -8 0 8 1098.45 40.32
 -8 0 7 -23.78 17.51
 -8 0 6 480.78 23.14
 -8 0 5 7.01 14.98
 -8 0 4 329.99 20.34
 -8 0 3 -0.18 16.78
 -8 0 2 49.94 18.82
 -8 0 1 -5.56 19.46
 -8 0 0 3.15 21.02
 -8 0 -1 -4.13 19.01
 8 0 1 2.03 9.03
 -8 0 -2 -38.47 19.64
 8 0 2 -2.28 10.09
 8 0 3 -4.11 10.7
 8 0 4 64.07 11.32
 8 0 5 -3.1 11.32
 8 0 5 2.5 13.48
 8 0 6 104.23 13.01
 8 0 6 102.07 14.73
 8 0 7 1.95 12.2
 8 0 7 0.6 13
 8 0 8 33.28 11.67
 8 0 8 0.87 11.65
 -8 0 -9 8.1 9.86
 8 0 9 -7.85 9.54
 8 0 9 -15.54 9.55
 8 0 10 34.35 7.15
 -8 0 -10 23.57 6.38
 -8 -1 17 103.62 14.58
 -8 1 17 66.07 13.69
 -8 1 16 65.91 19.61
 -8 -1 16 15.7 18.42
 -8 1 15 193.47 25.39
 -8 -1 15 551.35 28.94
 -8 1 14 9.81 23.77
 -8 -1 14 12.18 24.58
 -8 1 13 1.99 26.01
 -8 -1 12 -7.9 18.41
 -8 1 12 3.06 25
 -8 -1 11 -6.03 17.59
 -8 1 11 9.44 24.77
 -8 -1 10 -9.38 17.09
 -8 1 10 -8.12 21.01
 -8 1 10 -8.66 22.55
 -8 1 9 119.82 20.84
 -8 -1 9 52.14 16.93
 -8 1 9 70.22 25.39
 -8 -1 8 23.61 16.18
 -8 1 8 11.09 18.54
 -8 1 8 -0.98 23.23
 -8 -1 7 196.79 16.31
 -8 1 7 203.28 20.74
 -8 -1 6 261.59 17.6
 -8 1 6 296.68 21.72
 -8 -1 5 222.92 16.31
 -8 1 5 217.44 19.71
 -8 -1 5 206.84 11.89
 -8 -1 4 182.3 15.54
 -8 1 4 183.42 19.62
 -8 -1 4 182.78 11.18
 -8 -1 3 8.78 13.19
 -8 1 3 -0.07 20.47
 -8 -1 3 2.73 7.84
 -8 -1 2 304.57 19.31
 -8 1 2 314.99 23.93
 -8 -1 1 16.62 16.61
 -8 1 1 -2.8 23.36
 -8 -1 0 463.23 25.17
 -8 1 0 548.42 29.92
 -8 -1 -1 13.62 17.85
 -8 1 -1 7.28 24.3
 8 -1 1 10.33 9.52
 8 1 2 226.64 13.02
 -8 -1 -2 264.08 20.45
 8 -1 2 247.18 13.86
 -8 -1 -3 5.5 16.05
 8 1 3 9.25 9.67
 8 1 3 6.41 14.09
 8 1 4 2.31 10.53
 8 -1 4 10.1 10.87
 8 1 4 16.64 14.15
 8 1 5 141.17 12.85
 8 -1 5 161.51 13.78
 8 1 5 137.12 16.2
 8 1 6 -8.27 11.59
 8 -1 6 11.01 12.79
 8 1 6 -3.69 15.17
 -8 -1 -7 57.16 12.73
 8 1 7 59.84 12.05
 8 -1 7 63.62 12.79
 8 1 7 51.25 14.3
 -8 -1 -8 5.85 10.49
 8 1 8 25.77 11.99
 8 -1 8 21.84 11.77
 8 1 8 9.26 13.11
 -8 -1 -9 46.96 8.64
 8 1 9 28.88 9.51
 -8 1 -9 47.11 11.34
 8 -1 9 18.34 9.6
 8 1 9 33.73 10.74
 8 1 10 12.54 6.37
 -8 1 -10 11.96 7.24
 8 -1 10 11.79 6.59
 -8 2 16 113.54 17.17
 -8 2 15 -11.28 19.33
 -8 2 14 67.98 20.77
 -8 2 13 52.7 24.31
 -8 -2 13 97.24 25.62
 -8 2 12 0.08 22.74
 -8 -2 12 17.96 21.91
 -8 2 12 2.09 22.91
 -8 -2 11 55.54 15.97
 -8 2 11 40.38 22.08
 -8 -2 11 38.89 22.06
 -8 2 11 49.75 23.7
 -8 -2 10 27.37 14.98
 -8 2 10 13.73 21.76
 -8 -2 10 17.12 22.78
 -8 2 10 48.36 22.97
 -8 -2 9 66.06 14.73
 -8 -2 9 52.3 12.56
 -8 -2 8 -0.84 14.16
 -8 -2 8 -22.96 21.47
 -8 2 8 0.09 23.19
 -8 -2 8 47.26 13.31
 -8 -2 7 4.5 13.47
 -8 -2 7 -6.51 11.92
 -8 -2 6 2.51 12.2
 -8 -2 6 8.79 11.78
 -8 -2 5 564.7 22.28
 -8 -2 5 620.29 22.32
 -8 -2 4 4.97 11.78
 -8 -2 4 6.02 10.49
 -8 -2 3 424.39 18.82
 -8 -2 3 476.3 18.74
 -8 -2 2 4.51 12.7
 -8 -2 1 787.38 28.62
 -8 -2 0 91.18 15.28
 8 -2 0 70.8 11.3
 -8 -2 -1 704.99 26.98
 8 -2 1 698.66 24.57
 8 2 1 674.24 26.65
 -8 -2 -2 21.53 14.05
 8 2 2 18.58 8.95
 8 -2 2 34.16 11.66
 8 2 2 9.58 14.13
 8 2 3 325.94 15.12
 -8 -2 -3 352.28 18.41
 8 -2 3 349.6 16.83
 8 2 3 354.15 20.29
 -8 -2 -4 3.61 12.61
 8 2 4 0.17 10.11
 8 -2 4 9.61 11.41
 8 2 4 -7.85 15.58
 -8 -2 -5 69.66 12.63
 8 2 5 60.86 11.38
 8 -2 5 62.45 12.32
 8 2 5 62.06 16.37
 -8 -2 -6 5.62 10.99
 8 2 6 39.35 11.45
 8 -2 6 2.04 12.12
 8 2 6 -7.62 16.33
 8 2 7 75.07 11.24
 -8 -2 -7 62.17 10.35
 8 -2 7 75.43 12.19
 8 2 7 55.21 14.98
 8 2 8 4.94 11.15
 8 -2 8 20.79 11.4
 8 2 9 73.48 8.92
 8 -2 9 78.71 9.28
 -8 2 -9 91.26 11.51
 8 2 9 55.49 10.12
 8 2 10 4.7 5.74
 -8 2 -10 2.65 7.1
 8 -2 10 12.52 5.98
 -8 -3 17 1.92 9.4
 -8 -3 16 58.17 14.71
 -8 -3 15 -19.65 18.25
 -8 3 14 -0.08 15.71
 -8 -3 14 -2.7 19.74
 -8 3 13 173.34 20.54
 -8 -3 13 1.01 21.53
 -8 3 12 134.37 23.22
 -8 -3 12 132.99 14.07
 -8 3 11 16.94 21.22
 -8 -3 11 6.67 21.09
 -8 -3 11 2.39 13.05
 -8 3 10 183.46 23.38
 -8 -3 10 192.7 22.55
 -8 3 10 147.05 21.33
 -8 -3 10 160.15 15.27
 -8 -3 10 178.67 14.98
 -8 -3 9 5.31 12.33
 -8 3 9 11.24 21.2
 -8 -3 9 6.85 19.35
 -8 3 9 -36.58 21.77
 -8 -3 8 260.76 15.34
 -8 3 8 213.95 23.91
 -8 3 8 206.13 23.11
 -8 -3 8 275.4 16.95
 -8 -3 7 103.82 12.42
 -8 3 7 57.86 21.67
 -8 -3 7 92.56 19.35
 -8 -3 7 109.62 14.36
 -8 -3 6 180.99 13.31
 -8 3 6 190.98 23.09
 -8 -3 6 194.2 15.94
 -8 -3 5 226.2 13.24
 -8 3 5 237.67 24.47
 -8 -3 5 196.51 15.64
 -8 -3 4 239.86 12.95
 -8 3 4 269.41 26.94
 -8 -3 3 34.66 9.95
 -8 3 3 37.94 23.74
 -8 -3 3 7.37 12.49
 -8 -3 2 263.86 13.9
 -8 -3 2 262.53 15.66
 -8 -3 1 276.86 14.19
 8 -3 -1 243.98 13.2
 -8 -3 0 219.55 14.17
 8 -3 0 200.3 13.29
 -8 -3 -1 216.91 13.79
 -8 3 -1 238.8 30.21
 8 -3 1 214.03 14.04
 8 -3 2 247.23 16.16
 8 3 2 277.27 17.74
 8 3 3 6.58 8.88
 -8 3 -3 0.09 25.13
 8 -3 3 -2.49 13.35
 8 3 3 3.05 13.87
 8 3 4 23.34 9.9
 8 -3 4 28.4 12.99
 8 3 4 27.24 15.68
 8 3 5 0.16 10.47
 8 -3 5 -7.97 12.59
 8 3 5 8.66 15.42
 8 3 6 156.3 12.2
 8 -3 6 181.93 14.13
 8 3 6 171.92 16.81
 8 3 7 -0.75 10.1
 8 -3 7 -7.35 11.48
 8 3 7 -4.05 13.8
 8 3 8 140.42 11.02
 8 -3 8 161.15 11.95
 8 3 9 -0.82 7.56
 8 -3 9 -2.98 7.58
 8 -3 10 38.95 5.13
 -8 -4 16 22.93 10.35
 -8 -4 15 -7.45 14.42
 -8 -4 14 97.46 18.45
 -8 -4 13 2.32 17.92
 -8 -4 13 0.1 12.71
 -8 4 12 0.08 14.79
 -8 -4 12 36.67 19.01
 -8 -4 12 32.03 14.12
 -8 4 11 119.14 21.28
 -8 -4 11 135.74 19.97
 -8 -4 11 125.36 15.54
 -8 4 10 18.56 19.91
 -8 -4 10 12.44 18.02
 -8 4 10 -11.94 15.31
 -8 -4 10 10.32 14.04
 -8 4 9 129.14 20.24
 -8 -4 9 149.39 18.08
 -8 -4 9 148.06 15.08
 -8 4 8 -5.81 19.31
 -8 -4 8 13.7 16.92
 -8 4 8 43.74 15.94
 -8 -4 8 -7.91 13.86
 -8 4 7 101.48 21.77
 -8 -4 7 152.15 17.71
 -8 -4 6 6.33 15.31
 -8 -4 6 -11.5 10.23
 -8 -4 5 3.61 13.2
 -8 -4 5 12.71 10.11
 -8 4 4 303.09 27.32
 -8 -4 4 412.83 18.61
 -8 -4 3 -20.13 12.76
 -8 4 2 259.66 30.78
 -8 -4 2 46.59 11.84
 -8 4 1 152.02 29.43
 -8 -4 1 148.27 13.55
 -8 4 0 5.39 25.87
 -8 4 -1 654.04 33.39
 8 -4 1 450.52 19.67
 -8 4 -2 18.56 25.34
 8 -4 2 1.21 11.46
 -8 4 -3 350.73 27.76
 8 -4 3 308.49 17.51
 8 4 4 7.16 9.52
 -8 4 -4 53.65 23.45
 8 -4 4 16.7 13.92
 8 4 4 11.58 14.66
 8 4 5 216.46 13.42
 -8 4 -5 282.49 23.66
 8 -4 5 273.84 16.06
 8 4 5 230.72 17.58
 8 4 6 0.69 10.01
 -8 4 -6 9.21 17.75
 8 -4 6 -2.41 11.28
 8 4 6 0.29 13.15
 -8 4 -7 166.89 17
 8 -4 7 149.54 11.81
 -8 4 -8 17.96 11.59
 8 -4 8 16.52 8.71
 8 -4 9 53.37 6.87
 -8 4 -9 60.66 8.72
 -8 -5 15 50.28 9.78
 -8 -5 14 -8.86 12.51
 -8 -5 13 87.57 14.26
 -8 -5 13 90.51 13.21
 -8 -5 12 -0.06 14.94
 -8 -5 12 18.57 13.65
 -8 -5 11 383.65 20.26
 -8 -5 11 387.83 19.25
 -8 5 10 -11.6 16.52
 -8 -5 10 24.86 15.82
 -8 -5 10 3.54 14.49
 -8 -5 9 231.74 17.68
 -8 -5 9 251.14 16.8
 -8 5 8 6.91 16.35
 -8 -5 8 4.09 14.26
 -8 -5 8 9.78 13.24
 -8 5 7 -7.55 16.67
 -8 -5 7 -6.16 13.58
 -8 -5 7 -0.05 12.97
 -8 5 6 114.98 18.98
 -8 -5 6 243.12 15.59
 -8 5 6 21.02 15.2
 -8 -5 6 289.5 13.79
 -8 -5 6 292.86 16.69
 -8 5 5 -10.18 19.12
 -8 -5 5 -5.7 11.98
 -8 -5 5 3.45 13.03
 -8 -5 4 523.83 20.78
 -8 -5 4 579.51 21.77
 -8 5 3 21.55 20.6
 -8 -5 3 34.12 12.4
 -8 5 2 44.21 24.05
 -8 -5 2 54.37 11.35
 -8 5 1 14 22.98
 -8 -5 1 11.52 11.49
 -8 5 0 37.88 25.56
 -8 -5 0 31.43 11.64
 -8 5 -1 214.54 26.37
 -8 -5 -1 148.05 13.37
 -8 5 -2 -12.16 25.74
 8 -5 2 1.92 12.05
 -8 5 -3 106.6 25.29
 8 -5 3 -3.87 13.05
 -8 5 -4 188.49 22.36
 8 -5 4 191.12 15.53
 -8 5 -5 26.57 18.25
 8 -5 5 8.11 12.57
 -8 5 -6 36.42 17.02
 8 -5 6 40.38 11.52
 -8 5 -7 35.92 12.34
 8 -5 7 25.42 9.04
 -8 -5 -7 30.54 7.38
 -8 5 -8 9.8 9.25
 8 -5 8 22.16 7.28
 -8 -5 -8 21.4 5.49
 -8 -6 14 46.48 8.82
 -8 -6 13 -10.45 11.13
 -8 -6 12 119.52 12.23
 -8 -6 11 5.47 11.59
 -8 -6 11 -3.52 12.9
 -8 -6 10 238.52 14.45
 -8 -6 10 311.21 17.08
 -8 6 9 18.07 13.31
 -8 -6 9 51.44 12.55
 -8 -6 9 52.38 9.93
 -8 -6 9 52.47 14.22
 -8 -6 8 152.21 11.88
 -8 -6 8 130.71 15.12
 -8 6 7 0.59 13.37
 -8 -6 7 33.48 12.81
 -8 -6 7 40.81 10.74
 -8 -6 6 140.68 11.6
 -8 -6 6 147.65 14.44
 -8 -6 5 69.83 14.02
 -8 -6 5 70.82 10.66
 -8 6 4 26.31 17.19
 -8 -6 4 26.86 13.3
 -8 -6 4 58.71 10.43
 -8 6 3 -1.16 17.84
 -8 -6 3 3.2 12.22
 -8 6 2 6.58 19.5
 -8 -6 2 10.56 11.93
 -8 6 1 129 21.44
 -8 6 0 98.79 21.94
 -8 6 -1 13.49 21.49
 -8 6 -2 18.8 21.14
 8 -6 2 -0.26 12.07
 -8 6 -3 48.46 18.87
 8 -6 3 29.66 11.7
 -8 -6 -3 31.16 10.11
 -8 6 -4 23.02 17.79
 8 -6 4 21.64 11.93
 -8 -6 -4 11.52 9.39
 8 -6 5 16.63 11.77
 -8 -6 -5 14.37 8.53
 8 -6 6 87.61 9.92
 -8 6 -6 88.05 12.76
 -8 -6 -6 86.23 8.12
 -8 6 -7 3.61 8.31
 8 -6 7 6.78 6.72
 -8 -6 -7 -2.23 5.49
 8 -6 8 75.53 5.92
 -8 -7 13 46.18 8.51
 -8 -7 12 6.37 10.01
 -8 -7 11 56.74 12.41
 -8 -7 9 203.46 12.38
 -8 -7 9 268.29 16.48
 -8 -7 8 28.06 10.27
 -8 -7 8 37.14 13.02
 -8 7 7 0.9 13.11
 -8 -7 7 4.43 12.6
 -8 7 6 72.99 13.79
 -8 -7 6 72.05 11.47
 -8 7 5 -6.33 13.25
 -8 -7 5 -7.81 12.88
 -8 7 4 130.42 15.12
 -8 -7 4 142.11 12.19
 -8 7 3 11.58 14.53
 -8 -7 3 18.78 13.14
 -8 7 2 82.12 15.76
 -8 -7 2 163.09 12.91
 -8 7 1 8.99 15.41
 -8 7 0 0.4 16.14
 -8 -7 0 46.11 10.83
 -8 7 -1 16.48 14.99
 -8 -7 -1 7.41 9.9
 -8 7 -2 79 14.93
 8 -7 2 80.89 12.34
 -8 -7 -2 72.26 10.61
 -8 7 -3 29.07 13.21
 8 -7 3 -2.44 11.4
 -8 7 -4 93.4 12.87
 -8 -7 -4 83.17 9.8
 -8 7 -5 15.17 8.9
 8 -7 5 11.13 9.28
 -8 -7 -5 15.01 6.72
 8 -7 6 24.38 6.83
 -8 -7 -6 19.8 5.24
 -8 -8 12 4.48 7.05
 -8 -8 11 13.75 8.75
 -8 -8 10 30.99 10.3
 -8 -8 9 46.23 9.01
 -8 -8 9 0.44 11.67
 -8 -8 8 0.48 8.95
 -8 -8 7 158.22 11.63
 -8 -8 7 142.29 13.48
 -8 -8 6 2.53 9.8
 -8 -8 5 235.97 12.97
 -8 -8 4 -3.91 9.26
 -8 -8 3 226.8 12.39
 -8 -8 3 213.34 13.69
 -8 -8 2 36.43 10.73
 -8 -8 2 38.74 9.82
 -8 -8 1 20.42 10.79
 -8 -8 1 17.21 9.12
 -8 -8 0 -4.82 10.88
 -8 -8 0 -17.98 10.09
 -8 -8 -1 133.59 10.31
 -8 -8 -1 117.04 10.67
 8 -8 2 -5.07 9.64
 -8 -8 -2 39.46 9.56
 8 -8 3 75.79 9.57
 -8 -8 -3 69.8 8.14
 8 -8 4 -1.75 8
 -8 -8 -4 4.42 5.84
 8 -8 5 49.66 6.44
 -8 -8 -5 44.27 5.25
 -8 -8 -5 39.62 4.78
 -8 -9 11 0.56 4.99
 -8 -9 10 40.29 7.24
 -8 -9 9 7.45 5.27
 -8 -9 8 65.98 7.31
 -8 -9 7 5.02 7.59
 -8 -9 6 97.66 9.6
 -8 -9 6 46.45 9.68
 -8 -9 5 2.15 8.77
 -8 -9 4 92.57 10.03
 -8 -9 4 144.2 10.68
 -8 -9 3 72.52 9.26
 -8 -9 3 0.03 9.14
 -8 -9 2 54.56 9.84
 -8 -9 2 20.41 8.29
 -8 -9 1 -6.79 7.43
 -8 -9 0 165.1 9.41
 -8 -9 0 154.28 9.29
 8 -9 1 6.52 7.81
 -8 -9 -1 -3.17 6.27
 -8 -9 -1 5.11 6.21
 8 -9 2 60.86 7.48
 -8 -9 -2 56.52 5.89
 8 -9 3 2.93 5.96
 -8 -10 8 1.31 4.77
 -8 -10 7 11.17 5.65
 -8 -10 6 0.76 4.98
 -8 -10 6 -0.57 6.1
 -8 -10 5 22.85 5.56
 -8 -10 5 24.46 6.42
 -8 -10 4 1.41 5.72
 -8 -10 4 -1.2 5.96
 -8 -10 3 53.72 6.47
 -8 -10 3 57.42 6.28
 -8 -10 2 7.99 5.26
 -8 -10 2 7.58 5.4
 -8 -10 1 46.06 5.39
 -8 -10 1 39.96 5.14
 -9 0 17 5.69 10.25
 -9 0 16 365.96 20.73
 -9 0 15 96.36 21.35
 -9 0 14 15.93 22.7
 -9 0 13 0.18 24.42
 -9 0 12 0.09 24.36
 -9 0 11 11.63 18.99
 -9 0 11 10.32 24.55
 -9 0 10 33.09 17.83
 -9 0 10 36.2 25.09
 -9 0 9 9.5 18.29
 -9 0 9 0.87 24.37
 -9 0 8 53.59 17.42
 -9 0 8 72.2 24.29
 -9 0 6 301.07 21.46
 -9 0 5 132.74 19.74
 -9 0 2 193.88 21.27
 -9 0 2 64.25 10.87
 -9 0 1 -17.28 18.95
 -9 0 0 647.44 29.65
 -9 0 -1 5.13 18.6
 -9 0 -2 93.7 18.86
 -9 0 -3 -6.7 16.43
 9 0 3 0.66 8.35
 9 0 4 94.82 10.05
 -9 0 -4 101.98 16.99
 -9 0 -5 -10.96 14.14
 9 0 5 -0.14 9.4
 9 0 6 117.42 9.84
 -9 0 -6 77.55 13.52
 -9 0 -7 12.59 10.3
 9 0 7 -3.92 7.69
 -9 0 -8 5.04 7.25
 9 0 8 8.79 6.03
 -9 -1 17 56.34 10.38
 -9 1 16 11.45 14.92
 -9 -1 16 5.08 14.93
 -9 1 15 215.44 21.73
 -9 -1 15 15.24 19.88
 -9 -1 14 211.09 24.93
 -9 1 14 23.2 23.24
 -9 1 13 -0.07 21.28
 -9 1 13 13.64 24.15
 -9 1 12 147.47 25.85
 -9 -1 12 177.89 18.75
 -9 1 12 171.73 22.71
 -9 -1 11 -30.38 17.23
 -9 1 11 1.97 21.96
 -9 1 11 -15.56 24.59
 -9 -1 10 207.26 18.57
 -9 1 10 212.33 23.12
 -9 1 10 192.13 25.09
 -9 -1 9 55.01 16.27
 -9 1 9 32.23 20.5
 -9 1 9 72.47 24.43
 -9 -1 8 4 14.9
 -9 1 8 -6.55 19.14
 -9 1 8 3.99 23.83
 -9 -1 7 38.43 14.93
 -9 1 7 79.59 20.06
 -9 -1 6 160.47 16.62
 -9 1 6 151.64 20.73
 -9 -1 5 -3.82 14.65
 -9 1 5 -2.44 21.25
 -9 -1 4 131.77 16.27
 -9 1 4 118.34 22.33
 -9 -1 4 79.63 11.9
 -9 -1 3 80.74 16.03
 -9 1 3 80.85 21.06
 -9 -1 3 65.86 11.38
 -9 -1 2 158.92 16.34
 -9 1 2 206.17 24.14
 -9 -1 2 163.83 12.58
 -9 -1 1 125.31 17.38
 -9 1 1 182.1 23.45
 -9 -1 0 107.85 17.11
 -9 1 0 162.35 23.51
 -9 -1 -1 185.87 17.49
 -9 1 -1 238.17 24.17
 -9 -1 -2 3.96 15.73
 -9 1 -2 2.67 20.44
 9 -1 2 6 8
 -9 -1 -3 160.95 15.88
 9 -1 3 128.94 10.18
 -9 -1 -4 2.09 14.05
 -9 1 -4 -23.72 18.58
 9 1 4 -3.05 8.45
 9 -1 4 1.63 8.86
 9 1 5 74.52 9.39
 9 -1 5 84.64 10.21
 -9 -1 -5 85.82 13.25
 -9 1 -5 94.98 16.29
 -9 -1 -6 2.68 10.64
 9 1 6 -1.35 8.2
 9 -1 6 -12.95 9.06
 -9 -1 -7 35.66 8.5
 9 1 7 30.98 7.56
 -9 1 -7 42.33 11.37
 9 -1 7 47.7 8.06
 9 1 8 -1.29 5.08
 -9 1 -8 -2.13 8.47
 9 -1 8 6.58 6.31
 -9 2 16 7.08 11.12
 -9 2 15 241.35 21.17
 -9 2 13 181.17 23.05
 -9 -2 13 214.48 23.67
 -9 2 13 225.43 23.29
 -9 -2 12 6.78 22.56
 -9 2 12 -43.77 23.74
 -9 -2 11 230.59 25.83
 -9 2 11 171.22 24.8
 -9 -2 11 195.22 16.61
 -9 -2 10 33.75 14.13
 -9 -2 10 64.24 22.27
 -9 2 10 46.09 23.37
 -9 -2 9 273.48 17.43
 -9 -2 9 318.68 25.01
 -9 2 9 314.48 25.36
 -9 -2 8 7.11 12.72
 -9 -2 8 7.42 20.32
 -9 2 8 8.75 21.93
 -9 -2 7 287.98 17.15
 -9 -2 7 286.23 16.06
 -9 -2 6 293.06 17.07
 -9 -2 6 319.76 16.82
 -9 -2 5 105.01 13.36
 -9 -2 5 122.68 13.24
 -9 -2 4 33.07 11.94
 -9 -2 4 32.77 11.51
 -9 -2 3 321.2 16.76
 -9 -2 3 289.56 16.25
 -9 -2 2 13.43 12.09
 -9 -2 2 63.23 12.53
 -9 -2 1 361.41 17.55
 -9 2 1 396.23 27.63
 -9 -2 1 352.53 16.94
 -9 -2 0 38.74 12.15
 -9 2 0 50.15 23.29
 -9 -2 -1 530.85 22.26
 -9 2 -1 685.53 32.24
 -9 -2 -2 0.82 12.12
 -9 2 -2 4.44 23.13
 9 -2 2 -0.65 8.14
 -9 -2 -3 16.41 10.96
 9 -2 3 14.83 8.83
 -9 -2 -4 58.86 11.08
 -9 2 -4 68.05 19.45
 9 -2 4 55.88 10.35
 -9 -2 -5 -3.45 9.29
 9 2 5 0.33 8.06
 -9 2 -5 0.06 16.27
 9 -2 5 1.22 8.93
 9 2 6 1.12 7.85
 -9 2 -6 0.91 14.17
 9 2 7 11.43 7.06
 -9 2 -7 9.02 10.71
 9 -2 7 -2.01 7.47
 -9 2 -8 34.91 8.55
 9 -2 8 22.81 5.8
 -9 -3 16 58.84 11.13
 -9 -3 15 -6.51 13.91
 -9 -3 14 38.14 17.77
 -9 3 13 -11.09 17.95
 -9 -3 12 180.42 21.46
 -9 3 12 166.37 22.07
 -9 3 11 -26.98 22.31
 -9 3 11 -22.58 20.73
 -9 3 10 165.62 23.19
 -9 -3 10 158.53 21.29
 -9 3 10 125.74 21.37
 -9 -3 10 169.92 14.2
 -9 -3 10 166.22 13.74
 -9 -3 9 8.29 11.12
 -9 3 9 12.36 22.26
 -9 -3 9 16.53 18.97
 -9 3 9 17.86 19.81
 -9 -3 9 11.93 12.18
 -9 -3 8 244.77 14.15
 -9 3 8 238.75 22.09
 -9 -3 8 281.52 21.31
 -9 3 8 211.69 22.77
 -9 -3 8 255.63 15.75
 -9 -3 7 35.43 10.28
 -9 3 7 32.82 22.32
 -9 -3 7 33.65 18.11
 -9 -3 7 36.04 12.16
 -9 -3 6 306.96 14.77
 -9 3 6 319.65 24.38
 -9 -3 6 313.61 17.31
 -9 -3 5 87.66 10.11
 -9 3 5 106.27 23.14
 -9 -3 5 74.89 13.51
 -9 -3 4 8.01 9.13
 -9 3 4 7.06 23.61
 -9 -3 4 -5.67 11.75
 -9 -3 3 2.49 8.79
 -9 3 3 0.41 23.51
 -9 -3 3 -8.54 11.34
 -9 -3 2 50.49 9.42
 -9 3 2 68.51 25.2
 -9 -3 2 58.59 11.81
 -9 3 1 9.83 24.82
 -9 -3 1 6.37 10.65
 -9 -3 0 319.23 16.21
 9 -3 1 16.97 8.57
 9 -3 2 265.86 13.33
 9 -3 3 -4.2 9.62
 9 -3 4 40.93 9.15
 9 -3 5 14.14 9.48
 9 -3 6 25.48 8.4
 9 -3 7 16.17 6.84
 9 -3 8 15.32 4.7
 -9 -3 -8 20.74 4.42
 -9 -4 15 27.75 10.89
 -9 -4 14 -15.07 13.54
 -9 -4 13 141.13 17.15
 -9 4 12 5.06 19.84
 -9 -4 12 -1.56 17.35
 -9 -4 11 101.5 18.76
 -9 -4 11 113.74 13.75
 -9 4 10 -25.43 20.29
 -9 -4 10 16.92 17.76
 -9 4 10 8.13 15.31
 -9 -4 10 -9.95 12.79
 -9 4 9 58.34 20.48
 -9 -4 9 75.29 17.5
 -9 4 9 14.36 16.17
 -9 -4 9 75.77 13.51
 -9 4 8 8.04 19.79
 -9 -4 8 25.52 15.84
 -9 4 8 8.63 17.08
 -9 -4 8 21.93 12.44
 -9 4 7 163.86 21.84
 -9 -4 7 178.11 17.16
 -9 -4 7 181.96 14.01
 -9 4 6 104.33 21.62
 -9 -4 6 113.21 15.75
 -9 -4 6 130.47 14.2
 -9 4 5 529.07 30
 -9 -4 5 578.35 24.43
 -9 4 4 144.82 22.3
 -9 -4 4 162.77 13.9
 -9 4 3 184.65 23.96
 -9 -4 3 162.41 13.53
 -9 4 2 2.02 23.12
 -9 -4 2 0.05 11.17
 -9 4 1 148.14 25.72
 -9 -4 1 83.74 12.17
 9 -4 0 79.42 9.97
 -9 -4 0 55.07 11.49
 9 -4 1 122.74 10.92
 -9 -4 -1 81.79 12.25
 -9 4 -2 -4.36 22.51
 9 -4 2 -0.04 9.39
 -9 -4 -2 -3.63 10.63
 -9 4 -3 73.27 20.93
 9 -4 3 57.19 10.33
 9 -4 4 85.16 9.74
 -9 4 -4 83.71 18.6
 -9 4 -5 36.02 15.18
 9 -4 5 26.22 8.88
 -9 4 -6 87.45 12.7
 9 -4 6 66.14 8.24
 -9 -4 -6 77.25 7.52
 -9 4 -7 20 8.89
 9 -4 7 20.15 5.83
 -9 -5 14 -2.38 8.76
 -9 -5 13 33.33 11.48
 -9 -5 12 108 12.1
 -9 5 11 1.02 15.63
 -9 -5 11 12.74 13.73
 -9 -5 11 21.8 12.14
 -9 -5 10 132.08 15.44
 -9 -5 10 130.35 14.3
 -9 5 9 -23.61 18.76
 -9 -5 9 15.85 13.94
 -9 -5 9 -9.58 12.98
 -9 -5 8 261.65 16.86
 -9 -5 8 246.8 16.1
 -9 5 7 -7.4 18.69
 -9 -5 7 10.58 12.77
 -9 -5 7 -4.9 11.75
 -9 5 6 45.77 19.24
 -9 -5 6 104.23 13.51
 -9 5 6 43.81 16.55
 -9 -5 6 81.34 9.4
 -9 -5 6 91.46 13.14
 -9 5 5 -13.26 19.52
 -9 -5 5 7.89 11.58
 -9 -5 5 -0.05 12.03
 -9 -5 5 6.21 8.58
 -9 5 4 77.38 20.14
 -9 -5 4 58.13 11.55
 -9 -5 4 59.03 13.04
 -9 -5 4 65.22 9.28
 -9 5 3 44.13 21.42
 -9 -5 3 60.1 10.98
 -9 -5 3 40.04 12.16
 -9 5 2 54.33 21.33
 -9 -5 2 31.34 11.86
 -9 5 1 64.34 22.83
 -9 -5 1 87.16 12.18
 -9 5 0 -7.49 22.77
 9 -5 0 5.62 9.13
 -9 -5 0 1.67 10.76
 -9 5 -1 40.35 20.79
 9 -5 1 30.49 10.24
 -9 -5 -1 12.72 10.2
 -9 5 -2 44 20.02
 9 -5 2 41.29 10.17
 -9 -5 -2 37.8 9.82
 -9 5 -3 4.01 17.61
 9 -5 3 24.8 9.24
 -9 -5 -3 -15.14 9.9
 -9 5 -4 3.41 15.3
 -9 5 -5 131.93 13.46
 9 -5 5 105.24 8.62
 -9 5 -6 3.03 9.37
 9 -5 6 8.68 6.33
 -9 -5 -7 61.54 4.65
 -9 -6 13 -1.47 6.57
 -9 -6 12 297.89 14.96
 -9 6 10 22.56 14
 -9 -6 10 73.33 12.49
 -9 6 9 2.21 14.39
 -9 -6 9 37.07 12.66
 -9 6 8 -16 15.66
 -9 -6 8 -0.71 11.96
 -9 6 7 -30.89 16.89
 -9 -6 7 6.63 12.63
 -9 6 6 27.58 17.61
 -9 -6 6 17.79 12.07
 -9 -6 6 22.04 8.84
 -9 -6 5 5.16 11.79
 -9 -6 5 -4.38 8.89
 -9 6 4 57.88 18.03
 -9 -6 4 22.85 12.04
 -9 6 3 4.49 17.85
 -9 -6 3 0.29 11.69
 -9 6 2 96.88 18.48
 -9 -6 2 102.31 12.12
 -9 6 1 -12.8 18.17
 -9 -6 1 3.35 10.17
 -9 6 0 282.97 20.27
 -9 -6 0 250.58 13.31
 -9 6 -1 81.02 16.07
 9 -6 1 64.5 9.65
 9 -6 2 102.19 10.66
 -9 6 -3 -14.07 13.7
 9 -6 3 -16.75 8.62
 -9 6 -4 89.22 11.37
 9 -6 4 74.13 7.98
 -9 -6 -4 79.52 7.89
 -9 6 -5 4.58 7.96
 9 -6 5 2.44 5.61
 -9 -6 -5 6.11 5.61
 -9 -6 -6 102.93 5.49
 -9 -7 12 3.75 6.8
 -9 -7 11 40.83 9.05
 -9 -7 10 26.09 10.36
 -9 -7 9 15.82 11.23
 -9 -7 8 150.47 13.94
 -9 7 7 -9.26 12.54
 -9 -7 7 -7.17 8.08
 -9 7 6 126.72 14.27
 -9 -7 6 139.11 10.37
 -9 -7 6 151.2 12.45
 -9 7 5 -0.2 13.1
 -9 -7 5 1.02 10.11
 -9 -7 5 3.25 8.4
 -9 7 4 64.96 13.82
 -9 -7 4 65.61 9.15
 -9 -7 4 73.04 11.64
 -9 7 3 3.02 13.32
 -9 -7 3 4.81 10.46
 -9 -7 3 1.02 8.44
 -9 7 2 55.55 13.13
 -9 -7 2 51.73 9.01
 -9 7 1 182.6 14.27
 -9 -7 1 104.02 10.46
 -9 7 0 154.79 13.66
 9 -7 0 114.29 9.63
 -9 7 -1 80.41 12.3
 9 -7 1 26.37 8.72
 -9 7 -2 -15.28 9.87
 -9 -7 -2 0.12 7.18
 -9 7 -3 7.67 6.82
 9 -7 3 11.25 6.51
 -9 -7 -3 6.56 6.37
 9 -7 4 3.14 4.54
 -9 -7 -4 3.6 5.08
 -9 -8 11 34.3 5.94
 -9 -8 10 5.07 7.08
 -9 -8 9 49.53 8.57
 -9 -8 8 7.83 8.64
 -9 -8 7 65.71 7.35
 -9 -8 7 71.28 9.57
 -9 -8 6 -15.61 7.87
 -9 -8 5 145.54 9.61
 -9 -8 5 134.46 10.91
 -9 -8 4 -2.44 7.75
 -9 -8 3 123.24 9.08
 -9 -8 2 28.05 7.64
 -9 -8 1 44.06 8.03
 -9 -8 1 41.46 7.03
 -9 -8 0 0.82 6.99
 -9 -8 0 -2.78 6.28
 9 -8 1 14.28 5.56
 -9 -8 -1 15.65 6.39
 -9 -8 -1 10.06 5.44
 -9 -8 -2 -0.26 5.25
 -9 -8 -2 1.67 4.61
 -9 -8 -3 17.96 4.15
 -9 -8 -3 15.87 3.93
 -9 -9 9 2.21 4.6
 -9 -9 8 22.23 5.89
 -9 -9 6 35.88 4.82
 -9 -9 5 -1.72 5.24
 -9 -9 4 127.89 7.57
 -9 -9 4 149.37 8.29
 -9 -9 3 -1.22 5.96
 -9 -9 3 6.04 5.27
 -9 -9 2 36.73 5.47
 -9 -9 2 40.35 6.07
 -9 -9 1 7.23 5.17
 -9 -9 1 8.36 4.72
 -9 -9 0 42.1 4.5
 -9 -9 0 42.34 4.71
 -10 0 16 12.92 10.82
 -10 0 15 -7.82 15.11
 -10 0 14 16.15 18.74
 -10 0 13 -37.81 21.96
 -10 0 12 6.08 17.34
 -10 0 12 -22.99 23
 -10 0 11 1.95 16.78
 -10 0 11 7.72 22.8
 -10 0 10 10.07 23.72
 -10 0 9 18.06 24.17
 -10 0 8 745 29.41
 -10 0 8 701.96 34.21
 -10 0 7 0.06 15.5
 -10 0 6 134.38 17.32
 -10 0 5 2.86 15.41
 -10 0 4 106.55 16.74
 -10 0 3 1.42 15.98
 -10 0 2 86.29 16.13
 -10 0 1 1.23 15.82
 -10 0 0 500.31 21.95
 -10 0 0 347.11 15.25
 -10 0 -1 1.11 14.71
 -10 0 -2 407.06 20.01
 -10 0 -3 1.79 13.21
 -10 0 -4 180.06 13.95
 -10 0 -5 1.04 9.01
 -10 0 -6 157.06 8.65
 -10 -1 16 20.01 10.12
 -10 1 15 8.82 14.54
 -10 -1 15 9.91 14.26
 -10 1 14 42.58 18.15
 -10 -1 14 79.56 17.26
 -10 -1 12 47.04 15.37
 -10 1 12 55.1 19.36
 -10 1 12 52.78 23.57
 -10 -1 11 -2.88 15.52
 -10 1 11 0.79 18.62
 -10 1 11 -16.74 23.37
 -10 -1 10 290.8 18.41
 -10 1 10 260.72 22
 -10 1 10 259.45 25.96
 -10 -1 9 87.04 15.45
 -10 1 9 111.71 23.54
 -10 -1 8 118.68 15.67
 -10 1 8 140.52 19.88
 -10 -1 8 109.77 23.72
 -10 1 8 118.63 23.42
 -10 -1 7 151.23 15.4
 -10 1 7 180.46 20.32
 -10 -1 6 15.51 13.23
 -10 1 6 26.92 19.09
 -10 -1 5 168.1 15.25
 -10 1 5 203.25 20.42
 -10 -1 4 14.77 13.52
 -10 1 4 18.47 18.33
 -10 -1 3 132.81 14.45
 -10 1 3 133.91 18.36
 -10 -1 2 4.42 13.11
 -10 1 2 -4.51 18.01
 -10 -1 2 -4.03 8.93
 -10 -1 1 291.26 16.87
 -10 1 1 317.9 21.96
 -10 -1 1 265.18 13.58
 -10 -1 0 266.54 17.87
 -10 -1 0 237.3 15.24
 -10 -1 -1 181.51 14
 -10 1 -1 169.47 19.16
 -10 -1 -1 127.83 10.79
 -10 -1 -2 15.93 11.02
 -10 1 -2 15.28 16.13
 -10 -1 -3 145.93 11.94
 -10 1 -3 163.83 16.28
 -10 1 -4 -5.3 12.89
 -10 -1 -5 71.05 7.7
 -10 1 -5 101.86 11.23
 -10 1 -6 -3.95 7.64
 -10 -1 -6 3.64 4.62
 -10 -2 15 116.4 13.34
 -10 2 15 48.22 11.76
 -10 2 14 -21.7 16.25
 -10 -2 14 -6.16 15.33
 -10 -2 12 53.99 21.74
 -10 2 12 8.52 20.39
 -10 -2 11 393.02 25.19
 -10 2 11 370.92 26.46
 -10 -2 11 372.15 18.3
 -10 -2 10 -9.74 12.45
 -10 -2 10 0.22 19.95
 -10 2 10 9.26 22.27
 -10 -2 9 150.31 14.44
 -10 -2 9 186.11 22.39
 -10 -2 8 32.35 12.33
 -10 -2 8 -9.81 20.53
 -10 2 8 -0.97 22.72
 -10 -2 7 216.54 14.66
 -10 -2 7 265.38 22.43
 -10 -2 6 6.99 11.01
 -10 -2 5 0.93 10.7
 -10 -2 5 13.33 10.11
 -10 -2 4 50.52 10.9
 -10 2 4 61.46 21.52
 -10 -2 4 62.2 10.78
 -10 -2 3 49.53 10.79
 -10 2 3 61.49 20.52
 -10 -2 3 53.29 10.17
 -10 -2 2 151.91 12.24
 -10 2 2 166.42 21.66
 -10 -2 2 152.5 12.01
 -10 -2 1 82.76 10.94
 -10 -2 1 79.44 10.48
 -10 -2 0 181.59 12.35
 -10 -2 0 166.72 12.56
 -10 -2 -1 46.53 9.65
 -10 2 -1 60.53 19.72
 -10 -2 -1 39.49 9.87
 -10 -2 -2 61.79 8.99
 -10 2 -2 83.62 17.43
 -10 -2 -2 68.89 9.91
 -10 2 -3 199.96 18.75
 -10 2 -4 95 14
 -10 2 -5 53.32 10.97
 -10 -2 -5 38.8 6.24
 -10 2 -6 3.48 8.05
 -10 -2 -6 1.22 4.33
 -10 -3 15 5.63 9.69
 -10 -3 14 126.65 14.12
 -10 -3 13 -30.6 15.63
 -10 -3 12 124 17.68
 -10 3 12 156.09 20.42
 -10 -3 11 134.15 19.19
 -10 3 11 100.99 19.79
 -10 3 11 152.55 21.71
 -10 3 10 45.5 20.16
 -10 -3 10 53.16 18.1
 -10 3 10 52.8 19.53
 -10 3 9 112.26 21.76
 -10 -3 9 101.83 19.24
 -10 3 9 66.64 21.77
 -10 -3 9 93.76 10.51
 -10 3 8 165.37 22.75
 -10 -3 8 152.85 19.08
 -10 3 8 139.84 22.57
 -10 -3 8 150.71 12.25
 -10 -3 8 155.17 11.47
 -10 -3 7 12.09 9.01
 -10 3 7 3.09 20.13
 -10 -3 7 7.36 16.4
 -10 3 7 -10.67 21.94
 -10 -3 7 12.48 10.08
 -10 -3 6 257.17 13.08
 -10 3 6 322.02 24.78
 -10 -3 6 293.48 19.74
 -10 -3 6 283.9 15.1
 -10 3 5 56.6 21.78
 -10 -3 5 51.85 11.57
 -10 3 4 134.08 22.56
 -10 -3 4 139 12.52
 -10 -3 3 30.23 10.14
 -10 -3 2 110.26 11.92
 -10 -3 1 14.2 10.25
 -10 -3 0 92.74 10.58
 -10 -3 -1 14.03 8.82
 -10 -3 -2 9.29 8.22
 -10 -3 -4 -13.84 7.18
 -10 -3 -5 25.19 5.78
 -10 3 -6 -0.77 6.66
 -10 -3 -6 2.21 3.75
 -10 -4 14 6.02 9.09
 -10 -4 13 55.06 11.51
 -10 4 12 12.8 17.17
 -10 -4 12 -4.55 13.75
 -10 4 11 77.48 21.45
 -10 -4 11 144.84 17.61
 -10 4 10 -3.27 18.13
 -10 -4 10 -4.96 15.03
 -10 4 10 -4.26 17.11
 -10 4 9 292.03 22.29
 -10 -4 9 304.94 18.87
 -10 -4 9 283.14 14.87
 -10 4 8 9.31 19.49
 -10 -4 8 14.03 14.6
 -10 -4 8 -0.8 10.79
 -10 4 7 365.72 23.8
 -10 -4 7 360.24 19.58
 -10 4 7 301.53 23.39
 -10 -4 7 362.94 17.27
 -10 4 6 23.57 20.17
 -10 -4 6 40.03 14.16
 -10 -4 6 16.67 12.05
 -10 4 5 328.65 23.85
 -10 -4 5 360.89 17.31
 -10 4 4 30.43 19.92
 -10 -4 4 29.61 12.49
 -10 -4 4 34.26 11.69
 -10 4 3 48.36 20.36
 -10 -4 3 4.66 11.1
 -10 4 2 124.35 20.58
 -10 -4 2 96.93 11.8
 -10 4 1 2.9 18.68
 -10 -4 1 12.16 10.22
 -10 4 0 98.82 19.1
 -10 -4 0 77.52 10.08
 -10 -4 -1 -4.94 9.12
 -10 4 -2 11.02 15.72
 -10 4 -3 -20.36 13.49
 -10 -4 -3 -12.38 7.4
 -10 4 -4 130.33 11.86
 -10 -4 -4 113.26 7.49
 -10 4 -5 1.61 7.87
 -10 -4 -5 3.83 4.66
 -10 -5 12 40.82 9.18
 -10 5 11 51.62 16.31
 -10 -5 11 -5.11 10.35
 -10 -5 10 1.02 11.84
 -10 -5 10 6.43 10.4
 -10 -5 9 42.49 11.91
 -10 -5 9 48.96 11.04
 -10 5 8 7.06 18.06
 -10 -5 8 5.22 11.63
 -10 -5 8 1.07 10.66
 -10 5 7 23.79 18.42
 -10 -5 7 17.72 11.48
 -10 -5 7 15.53 10.9
 -10 5 6 -3.61 18.33
 -10 -5 6 6.59 10.6
 -10 5 6 14.93 15.67
 -10 -5 6 7.36 10.45
 -10 5 5 41.69 18.49
 -10 -5 5 67.61 11.14
 -10 5 5 26.1 16.9
 -10 -5 5 31.18 10.94
 -10 5 4 -2.83 17.65
 -10 -5 4 -9.91 11.13
 -10 -5 3 105.27 8.55
 -10 -5 3 120.58 11.77
 -10 5 2 6.18 17.79
 -10 -5 2 3.74 9.55
 -10 -5 2 -4.19 7.52
 -10 5 1 109.34 17.33
 -10 -5 1 106.5 10.83
 -10 5 0 66.41 19.01
 -10 -5 0 434.87 16.37
 -10 5 -1 24.53 14.46
 -10 -5 -1 13.81 8.26
 -10 5 -2 18.51 12.33
 -10 -5 -2 19.4 7.42
 -10 5 -3 64.78 10.36
 -10 -5 -3 43.17 6.62
 -10 5 -4 0.62 7.46
 -10 -5 -4 6.16 4.96
 -10 -5 -5 60.1 4.21
 -10 -6 11 4.8 6.39
 -10 6 10 60.89 13.63
 -10 -6 10 37.95 9.14
 -10 6 9 15.59 13.76
 -10 -6 9 0.68 9.64
 -10 6 8 60 16.06
 -10 -6 7 165.24 14.59
 -10 6 6 60.05 15.96
 -10 -6 6 123.51 13.55
 -10 6 5 22 14.79
 -10 6 4 131.64 16.05
 -10 -6 4 91.87 7.75
 -10 -6 3 634.95 16.48
 -10 -6 3 -1.11 7.14
 -10 -6 2 190.92 10.37
 -10 -6 2 161.53 12.34
 -10 -6 1 -2.99 7.75
 -10 -6 0 56.67 7.46
 -10 -6 0 55.87 9.06
 -10 6 -1 14.61 10.09
 -10 -6 -1 9.73 6.87
 -10 6 -2 87.02 9.11
 -10 -6 -2 96.7 7.13
 -10 6 -3 -3.3 5.96
 -10 -6 -3 0.82 4.69
 -10 -7 10 23.13 6.17
 -10 -7 9 8.85 7.18
 -10 -7 8 26.41 7.9
 -10 -7 7 54.04 8.44
 -10 -7 6 6.46 8.38
 -10 7 5 28.38 10.34
 -10 -7 5 35.99 8.44
 -10 7 4 -9.7 10.23
 -10 -7 4 8.66 7.61
 -10 -7 4 -7.24 6.09
 -10 7 3 18.16 9.76
 -10 -7 3 34.48 7.79
 -10 -7 3 34.45 6.45
 -10 -7 2 10.24 7.1
 -10 -7 2 -2.45 5.84
 -10 7 1 6.59 7.51
 -10 -7 1 17.81 6.96
 -10 -7 1 15.46 5.38
 -10 -7 0 3.99 6.12
 -10 -7 0 1.4 4.78
 -10 -7 -1 3.05 4.04
 -10 -8 8 0.36 5.26
 -10 -8 7 33.55 6.22
 -10 -8 6 2.2 5.93
 -10 -8 5 16.74 6.14
 -10 -8 4 -3.2 5.82
 -10 -8 3 4.87 5.67
 -10 -8 0 35.13 3.97
 -11 0 14 16.45 12.74
 -11 0 13 6.83 15.62
 -11 0 12 93.33 14.09
 -11 0 12 76.19 17.88
 -11 0 11 3.16 13.97
 -11 0 11 -12.31 19.47
 -11 0 10 62.8 15.52
 -11 0 10 413.19 24.52
 -11 0 9 -0.7 14.34
 -11 0 9 5.14 20.3
 -11 0 8 112.85 14.74
 -11 0 7 6.51 13.99
 -11 0 6 96.45 14.26
 -11 0 5 -0.35 13.54
 -11 0 4 134.38 14.86
 -11 0 3 0.93 13.17
 -11 0 2 420.4 18.88
 -11 0 1 3 12.1
 -11 0 0 267.05 14.79
 -11 0 -2 236.66 11.81
 -11 0 -3 -0.7 6.63
 -11 1 14 17.27 12.1
 -11 -1 14 22.39 11.71
 -11 1 13 26.53 15.94
 -11 1 12 0.39 14.06
 -11 1 12 -4.19 17.96
 -11 -1 11 -4.99 12.13
 -11 1 11 -4.26 15.43
 -11 1 11 -10 19.57
 -11 -1 10 13.39 12.24
 -11 1 10 -21.55 22.09
 -11 -1 9 231.37 14.98
 -11 1 9 263.44 18.63
 -11 1 9 238.66 23.64
 -11 -1 8 46.36 12.51
 -11 1 8 69.77 16.57
 -11 -1 8 49.84 19.18
 -11 1 8 51.88 20.45
 -11 -1 7 100.56 13.11
 -11 1 7 107.08 16.55
 -11 -1 7 101.83 19.69
 -11 1 7 104.23 20.76
 -11 -1 6 2.28 11.36
 -11 1 6 3 15.58
 -11 -1 5 85.09 12.46
 -11 1 5 64.61 15.63
 -11 -1 4 -6.67 11.27
 -11 1 4 4.71 15.26
 -11 -1 3 81.9 11.26
 -11 1 3 90.24 15.24
 -11 -1 2 0.79 9.81
 -11 1 2 -1.05 14.03
 -11 -1 1 159.83 11.56
 -11 1 1 165.58 15.38
 -11 1 0 109.59 13.87
 -11 -1 0 46.36 9.22
 -11 1 -1 108.69 12.36
 -11 -1 -1 60.68 8.59
 -11 -1 -2 -2.61 6.67
 -11 1 -2 -15.21 9.76
 -11 1 -3 43.17 8.46
 -11 1 -4 26.56 5.89
 -11 -2 14 -1.64 9.84
 -11 2 13 29.99 14.25
 -11 -2 13 20.93 12.98
 -11 -2 12 32.49 14.77
 -11 2 12 32.16 16.69
 -11 -2 11 54.57 16.4
 -11 2 11 5.04 18.31
 -11 -2 10 -1.6 9.8
 -11 2 10 410.35 25.77
 -11 -2 9 74.42 18.58
 -11 -2 9 137.28 11.68
 -11 -2 8 51.3 10.11
 -11 2 8 42.07 17.76
 -11 -2 8 51.56 17.25
 -11 2 8 41.12 20.6
 -11 -2 7 15.08 9.68
 -11 2 7 18.9 17.73
 -11 -2 7 -2.75 16.14
 -11 2 7 1.92 19.92
 -11 -2 6 51.71 9.79
 -11 2 6 69.72 17.92
 -11 -2 6 54.23 16.46
 -11 -2 5 10.82 8.96
 -11 2 5 22.92 17.35
 -11 -2 4 43.86 8.86
 -11 2 4 76.48 16.75
 -11 -2 3 33.35 8.53
 -11 2 3 31.92 15.94
 -11 -2 2 97.9 8.8
 -11 -2 2 95 8.89
 -11 2 1 50.65 16.41
 -11 -2 1 -3.18 7.08
 -11 2 0 209.18 15.82
 -11 -2 0 171.09 9.77
 -11 2 -1 8.28 11.72
 -11 -2 -1 4.92 7.53
 -11 2 -2 4.14 10
 -11 -2 -2 49.13 6.38
 -11 2 -3 51.75 8.41
 -11 -2 -3 22.14 4.48
 -11 2 -4 17.67 5.8
 -11 -3 13 6.58 9.82
 -11 -3 12 128.72 13.68
 -11 3 12 149.73 15.52
 -11 3 11 3.24 15.05
 -11 -3 11 -6.43 13.43
 -11 3 11 4.28 16.34
 -11 3 10 273.58 19.1
 -11 -3 10 74.97 15.31
 -11 3 9 6.38 17.49
 -11 -3 9 20.14 15.03
 -11 -3 8 106.36 15.98
 -11 3 8 123.55 19.77
 -11 -3 7 5.26 14.64
 -11 3 7 13.36 18.94
 -11 -3 6 40.02 14.37
 -11 3 6 46.24 18.68
 -11 -3 5 11.6 13.75
 -11 -3 5 2.15 7.85
 -11 -3 4 -0.17 8.53
 -11 -3 3 10.11 8.51
 -11 -3 2 13.86 8.47
 -11 -3 -1 55.68 7.16
 -11 -3 -2 6.57 5.33
 -11 3 -3 5.89 7.23
 -11 -3 -3 -0.18 3.99
 -11 3 -4 0.07 4.83
 -11 -4 12 6.18 8.25
 -11 4 11 31.28 14.08
 -11 -4 11 26.69 10.16
 -11 -4 10 158.56 13.1
 -11 4 10 164.84 15.92
 -11 4 9 102.1 16.58
 -11 4 9 96.35 16.31
 -11 4 8 87.09 16.69
 -11 4 8 -15.47 17.08
 -11 4 7 -13.48 17.23
 -11 4 7 1.43 16.1
 -11 4 6 73.03 17.61
 -11 -4 6 81.93 11.94
 -11 4 6 66.89 16.46
 -11 -4 6 79.44 9.15
 -11 4 5 28.32 15.57
 -11 -4 5 31.98 11.07
 -11 4 5 26.34 16.21
 -11 -4 5 21.33 8
 -11 4 4 85.62 16.69
 -11 -4 4 76.92 10.44
 -11 -4 4 84.14 9.27
 -11 4 3 -3.7 14.12
 -11 -4 3 0.28 9.05
 -11 4 2 46.33 14.38
 -11 -4 2 45.08 8.97
 -11 4 1 7.73 13.44
 -11 4 0 45.45 11.99
 -11 -4 0 23.05 6.92
 -11 4 -1 19.92 9.73
 -11 -4 -1 15.81 5.65
 -11 4 -2 6.23 7.81
 -11 -4 -2 7.72 4.67
 -11 4 -3 28.86 5.87
 -11 5 10 11.98 11.78
 -11 5 9 126.75 14.52
 -11 5 8 0.66 13.17
 -11 5 7 98.48 14.59
 -11 -5 7 45.27 7.98
 -11 5 6 45.17 14.92
 -11 -5 6 7.49 7.91
 -11 5 5 83.15 14.42
 -11 -5 5 49.94 8.15
 -11 5 4 19.67 13.59
 -11 -5 4 -14.39 7.92
 -11 5 3 236.91 15.52
 -11 -5 3 269.43 12.14
 -11 5 2 -6.37 11.31
 -11 -5 2 -4.72 7.4
 -11 5 1 29.92 10.46
 -11 -5 1 26.02 6.64
 -11 5 0 36.34 9.34
 -11 -5 0 30.84 5.99
 -11 5 -1 13.12 7.13
 -11 -5 -1 8.58 4.79
 -11 5 -2 8.78 5.23
 -11 6 8 55.76 9.53
 -11 -6 8 41.35 5.62
 -11 6 7 7.35 9.79
 -11 -6 7 -3.56 6.13
 -11 6 6 100.96 11.23
 -11 -6 6 110.76 7.95
 -11 6 5 1.35 10.18
 -11 -6 5 2.22 6.28
 -11 6 4 176.66 11.8
 -11 -6 4 159.07 8.42
 -11 6 3 28.07 8.85
 -11 -6 3 22.25 5.78
 -11 6 2 173.62 10.08
 -11 -6 2 155.37 7.77
 -11 6 1 12.83 6.69
 -11 -6 1 13.14 4.9
 -11 -6 0 23.72 4.24
 -11 -7 5 24.85 4.61
 -11 -7 4 3.31 4.4
 -11 -7 3 27.82 4.3
 -12 0 12 22.79 11.31
 -12 0 11 -3.29 8.69
 -12 0 11 -7 12.56
 -12 0 10 283.07 17.14
 -12 0 10 234.85 13.01
 -12 0 9 4.43 9.88
 -12 0 9 9.86 14.33
 -12 0 8 92.98 10.88
 -12 0 7 0.32 10.41
 -12 0 6 95.1 10.92
 -12 0 5 4.33 9.44
 -12 0 4 91.91 10.02
 -12 0 3 6.96 8.72
 -12 0 2 161.75 9.84
 -12 0 1 -0.33 6.61
 -12 0 0 22.41 5.6
 -12 1 12 -0.96 10.62
 -12 1 11 95.11 13.56
 -12 1 11 93.07 10.92
 -12 -1 10 -5.79 7.93
 -12 1 10 8.38 10.71
 -12 1 10 -1.16 13.87
 -12 1 9 119.19 12.22
 -12 -1 9 130.03 14.88
 -12 1 9 117.77 15.7
 -12 -1 9 86.41 9.35
 -12 -1 8 13.02 8.53
 -12 1 8 5.13 11.63
 -12 -1 8 5.18 13.95
 -12 1 8 8.56 15.24
 -12 -1 7 13.44 8.31
 -12 1 7 3.22 11.95
 -12 1 7 -17.82 15.8
 -12 -1 6 -3.98 8.63
 -12 1 6 22.91 12.04
 -12 -1 6 1.96 13.59
 -12 1 6 -5.89 16.2
 -12 -1 5 8.08 8.07
 -12 -1 5 -1.39 14.03
 -12 -1 4 -4.44 7.88
 -12 1 4 5.64 11.14
 -12 -1 3 49.36 7.12
 -12 1 3 55.71 10.14
 -12 -1 2 37.84 6.37
 -12 1 2 4.98 8.57
 -12 1 1 28.33 7.98
 -12 1 0 2.52 6.44
 -12 1 -1 1.21 4.94
 -12 -2 12 8.51 8.36
 -12 2 11 7.67 10.16
 -12 -2 11 1.39 10.12
 -12 2 11 3.56 11.4
 -12 2 10 40.52 11.36
 -12 -2 10 37.72 11.45
 -12 2 10 30.02 13.14
 -12 2 9 22.44 11.8
 -12 -2 9 23.42 12.1
 -12 2 9 10.41 13.83
 -12 2 8 55.04 12.03
 -12 -2 8 50.2 12.24
 -12 2 8 56.36 14.5
 -12 2 7 15.95 11.77
 -12 -2 7 11.75 12.07
 -12 2 7 5.42 14.13
 -12 2 6 4.57 11.67
 -12 -2 6 4.72 12.04
 -12 2 6 -5.73 14.28
 -12 2 5 86.08 12.18
 -12 -2 5 53.08 11.91
 -12 2 5 86.33 14.81
 -12 2 4 48.68 11.08
 -12 -2 4 33.75 10.99
 -12 2 3 100.67 11.2
 -12 2 2 13.21 9.47
 -12 2 1 12.96 8.19
 -12 2 0 35.51 6.94
 -12 2 -1 11.84 5.01
 -12 3 11 2.71 9.15
 -12 -3 11 3.32 7.35
 -12 3 10 10.22 10.46
 -12 -3 10 18.47 8.89
 -12 -3 9 -0.27 9.33
 -12 3 9 1.77 11.4
 -12 -3 8 -6.9 9.93
 -12 3 8 4.61 12.42
 -12 -3 7 1.11 9.87
 -12 3 7 6.35 13.15
 -12 -3 6 7.23 9.44
 -12 3 6 8.07 12.73
 -12 -3 5 11.43 8.97
 -12 3 5 15.11 12.78
 -12 -3 4 48 8.55
 -12 -3 3 1.64 7.81
 -12 -3 2 9.35 6.15
 -12 3 1 9.2 7.45
 -12 3 0 30.71 6.41
 -12 4 10 49.35 8.86
 -12 4 9 11.8 9.59
 -12 4 8 40.78 10.22
 -12 4 7 -3.23 10.16
 -12 -4 7 -1.01 5.56
 -12 4 6 89.03 10.83
 -12 4 5 23.68 9.82
 -12 4 5 1.54 8.48
 -12 4 4 153.95 10.32
 -12 4 4 91.81 9.31
 -12 4 3 -0.44 8.19
 -12 4 3 3.18 7.49
 -12 4 2 31.67 7.41
 -12 4 1 74.06 6.9
 -12 5 7 71.37 7.88
 -12 5 6 8.73 7.35
 -12 5 5 45.53 7.37
 -12 5 4 1.75 6.69
 -12 5 3 81.19 6.56
 -13 0 9 -5.21 7.02
 -13 0 4 20.34 6.8
 -13 0 3 -0.83 5.69
 -13 -1 8 -1.66 7.05
 -13 1 8 5.62 7.32
 -13 -1 7 1.02 7.25
 -13 1 7 10.68 7.79
 -13 1 6 30.93 5.51
 -13 -1 6 27.22 7.17
 -13 1 6 39.21 8.13
 -13 -1 5 13.04 6.68
 -13 1 5 15.78 7.48
 -13 -1 4 46.92 6.38
 -13 1 4 50.59 7.07
 -13 2 6 -1.17 5.27

_iucr_refine_instructions_details
;

    a1-1.res created by SHELXL-2014/7

TITL a1-1_a.res in P2(1)/c
CELL 1.54184 10.574326 10.655825 15.227314 90 108.4931 90
ZERR 4 0.000748 0.000678 0.001182 0 0.0079 0
LATT 1
SYMM -X,0.5+Y,0.5-Z
SFAC C H Cu F N O
UNIT 64 24 4 4 4 16
 
L.S. 50
PLAN  20
BOND $H
LIST 6
MORE -1
CONF
fmap 2
acta
REM <olex2.extras>
REM <HklSrc "%.\\A1-1.hkl">
REM </olex2.extras>
 
WGHT    0.151000   22.008900
FVAR       0.52953
CU01  3    0.094201   -0.085150    0.514042    11.00000    0.02402    0.03360 =
         0.02932   -0.00002    0.00873    0.00095
O002  6    0.182856   -0.002689    0.632201    11.00000    0.03303    0.05121 =
         0.03945   -0.01188    0.00838    0.00258
O003  6    0.019386    0.138658    0.611167    11.00000    0.03738    0.05317 =
         0.03101   -0.00940    0.00857    0.00571
O004  6    0.022749    0.328313    0.926349    11.00000    0.03432    0.04837 =
         0.04696   -0.01514    0.01679   -0.00114
O005  6    0.189882    0.467739    0.957763    11.00000    0.03110    0.04981 =
         0.05404   -0.01591    0.01535   -0.00438
N006  5    0.774285    0.254106    0.967841    11.00000    0.02398    0.03311 =
         0.04491    0.00052    0.00718   -0.00637
F007  4    0.803926   -0.078698    0.966538    11.00000    0.04699    0.04069 =
         0.18327    0.01204    0.01739    0.00782
C008  1    0.133944    0.366728    0.923284    11.00000    0.02929    0.04293 =
         0.03298   -0.00734    0.00945    0.00161
C009  1    0.342309    0.267514    0.912372    11.00000    0.02841    0.04247 =
         0.03402   -0.01021    0.00732   -0.00029
AFIX  43
H009  2    0.390116    0.310804    0.965577    11.00000   -1.20000
AFIX   0
C00A  1    0.128644    0.089849    0.657301    11.00000    0.02781    0.04629 =
         0.02764   -0.00218    0.01016   -0.00192
C00B  1    0.408163    0.184854    0.870894    11.00000    0.02857    0.03700 =
         0.03346   -0.00892    0.00923   -0.00014
C00C  1    0.200966    0.147287    0.749480    11.00000    0.02345    0.04342 =
         0.03901   -0.00678    0.00966   -0.00231
C00D  1    0.205659    0.285693    0.874758    11.00000    0.02983    0.04389 =
         0.02891   -0.00550    0.01314   -0.00330
C00E  1    0.555237    0.165840    0.909904    11.00000    0.02271    0.04470 =
         0.03618   -0.00414    0.01009   -0.00109
C00F  1    0.337685    0.124264    0.790300    11.00000    0.03321    0.04681 =
         0.02820   -0.01398    0.00490   -0.00501
AFIX  43
H00F  2    0.380918    0.067918    0.762881    11.00000   -1.20000
AFIX   0
C00G  1    0.641436    0.266238    0.933734    11.00000    0.02777    0.03951 =
         0.03339   -0.00603    0.00845    0.00111
AFIX  43
H00G  2    0.605565    0.346721    0.925736    11.00000   -1.20000
AFIX   0
C00H  1    0.136069    0.225273    0.793243    11.00000    0.02715    0.05067 =
         0.02564   -0.00529    0.00629    0.00015
AFIX  43
H00H  2    0.044596    0.237488    0.767805    11.00000   -1.20000
AFIX   0
C00I  1    0.825636    0.138766    0.978284    11.00000    0.02438    0.04432 =
         0.07054    0.00479    0.00960    0.00342
AFIX  43
H00I  2    0.917635    0.128616    1.001496    11.00000   -1.20000
AFIX   0
C00J  1    0.610387    0.046848    0.921111    11.00000    0.03102    0.04169 =
         0.07643   -0.00822    0.00952   -0.00283
AFIX  43
H00J  2    0.556547   -0.024016    0.905545    11.00000   -1.20000
AFIX   0
C00K  1    0.746494    0.036043    0.955764    11.00000    0.03225    0.04057 =
         0.09605    0.00543    0.00573    0.00770
C00L  1    0.588890    0.091886    0.656097    10.50000    0.17206    0.08468 =
         0.11161    0.03432    0.11792    0.04808
AFIX 137
H00A  2    0.596224    0.071994    0.596414    10.50000   -1.20000
H00B  2    0.502206    0.068034    0.657909    10.50000   -1.20000
H00C  2    0.655975    0.047047    0.703094    10.50000   -1.20000
AFIX   0
C00M  1    0.747036    0.217301    0.710189    10.50000    0.04648    0.40060 =
         0.06591   -0.09934    0.02548   -0.02401
AFIX 137
H00D  2    0.774486    0.131604    0.723414    10.50000   -1.20000
H00E  2    0.775255    0.265422    0.766358    10.50000   -1.20000
H00K  2    0.786728    0.251196    0.666695    10.50000   -1.20000
AFIX   0
C1    1    0.607001    0.222705    0.672157    10.50000    0.11764    0.10042 =
         0.03854    0.01014    0.05394    0.02631
AFIX  23
H1A   2    0.577713    0.271381    0.615451    11.00000   -1.20000
H1B   2    0.564706    0.253507    0.715919    11.00000   -1.20000
AFIX   0
HKLF 4
 
REM  a1-1_a.res in P2(1)/c
REM R1 =  0.1033 for    2072 Fo > 4sig(Fo)  and  0.1546 for all    3197 data
REM    210 parameters refined using      0 restraints
 
END  
     
WGHT      0.1570     22.0919 

REM Highest difference peak  1.696,  deepest hole -0.806,  1-sigma level  0.190
Q1    1  -0.0954  0.0830  0.5841  11.00000  0.05    1.70
Q2    1   0.0953 -0.0842  0.6248  11.00000  0.05    1.62
Q3    1   0.9010  0.0862  0.9228  11.00000  0.05    1.51
Q4    1   0.9012  0.0856  0.8103  11.00000  0.05    1.29
Q5    1   0.9089  0.0898  1.0355  11.00000  0.05    1.26
Q6    1   0.9028  0.4101  0.6405  11.00000  0.05    1.13
Q7    1   0.9047  0.4167  0.7561  11.00000  0.05    1.01
Q8    1   0.9057  0.0879  0.6940  11.00000  0.05    0.97
Q9    1   0.7715  0.0839  0.7345  11.00000  0.05    0.94
Q10   1   0.7736  0.2392  0.6945  11.00000  0.05    0.87
Q11   1   0.6719  0.3023  0.6767  11.00000  0.05    0.87
Q12   1   0.6117  0.0422  0.6888  11.00000  0.05    0.72
Q13   1   0.5701  0.0816  0.6275  11.00000  0.05    0.72
Q14   1   0.6797  0.1571  0.6950  11.00000  0.05    0.70
Q15   1   0.1004 -0.0010  0.5687  11.00000  0.05    0.65
Q16   1  -0.0138 -0.1016  0.4682  11.00000  0.05    0.64
Q17   1   0.1827  0.0024  0.5402  11.00000  0.05    0.63
Q18   1   0.5978  0.2537  0.6791  11.00000  0.05    0.63
Q19   1   0.2053  0.0923  0.6904  11.00000  0.05    0.58
Q20   1   0.1805  0.3546  1.0426  11.00000  0.05    0.57

  REM The information below was added by Olex2.
  REM
  REM R1 = 0.1033 for 2072 Fo > 4sig(Fo) and 0.1546 for all 9096 data
  REM n/a parameters refined using n/a restraints
  REM Highest difference peak 1.70, deepest hole -0.81
  REM Mean Shift 0, Max Shift 0.000.

  REM +++ Tabular Listing of Refinement Information +++
  REM R1_all = 0.1546
  REM R1_gt = 0.1033
  REM wR_ref = 0.3438
  REM GOOF = 1.095
  REM Shift_max = 0.000
  REM Shift_mean = 0
  REM Reflections_all = 9096
  REM Reflections_gt = 2072
  REM Parameters = n/a
  REM Hole = -0.81
  REM Peak = 1.70
  REM Flack = n/a

  
;
_olex2_submission_special_instructions  'No special instructions were received'
_oxdiff_exptl_absorpt_empirical_details
;
Empirical correction (ABSPACK) includes:
- Absorption correction using spherical harmonics
- Frame scaling
- Detector area scaling
;
_oxdiff_exptl_absorpt_empirical_full_max  2.620
_oxdiff_exptl_absorpt_empirical_full_min  0.523
