# Supplementary material
Source: publisher figshare collection journal article supplement (https://acs.figshare.com/ndownloader/files/18064346)
Supplement: Supplementary file 1 [file 18064346 › NKU-FlexMOF-1a-CO2.cif]

 
data_NKU-FlexMOF-1a-CO2
 
_audit_creation_method            'SHELXL-2016/6'
_shelx_SHELXL_version_number      '2016/6'
_chemical_name_systematic         ?
_chemical_name_common             ?
_chemical_melting_point           ?
_chemical_formula_moiety          ?
_chemical_formula_sum
 'C15 H6 Cu F N O8' 
_chemical_formula_weight          410.76

loop_
 _atom_type_symbol
 _atom_type_description
 _atom_type_scat_dispersion_real
 _atom_type_scat_dispersion_imag
 _atom_type_scat_source
 'C'  'C'   0.0181   0.0091
 'International Tables Vol C Tables 4.2.6.8 and 6.1.1.4'
 'H'  'H'   0.0000   0.0000
 'International Tables Vol C Tables 4.2.6.8 and 6.1.1.4'
 'N'  'N'   0.0311   0.0180
 'International Tables Vol C Tables 4.2.6.8 and 6.1.1.4'
 'O'  'O'   0.0492   0.0322
 'International Tables Vol C Tables 4.2.6.8 and 6.1.1.4'
 'F'  'F'   0.0727   0.0534
 'International Tables Vol C Tables 4.2.6.8 and 6.1.1.4'
 'Cu'  'Cu'  -1.9646   0.5888
 'International Tables Vol C Tables 4.2.6.8 and 6.1.1.4'
 
_space_group_crystal_system       monoclinic
_space_group_IT_number            14
_space_group_name_H-M_alt         'P 21/c'
_space_group_name_Hall            '-P 2ybc'
 
_shelx_space_group_comment
;
The symmetry employed for this shelxl refinement is uniquely defined
by the following loop, which should always be used as a source of
symmetry information in preference to the above space-group names.
They are only intended as comments.
;
 
loop_
 _space_group_symop_operation_xyz
 'x, y, z'
 '-x, y+1/2, -z+1/2'
 '-x, -y, -z'
 'x, -y-1/2, z-1/2'
 
_cell_length_a                    10.5570(8)
_cell_length_b                    11.4035(9)
_cell_length_c                    14.3239(12)
_cell_angle_alpha                 90
_cell_angle_beta                  108.725(9)
_cell_angle_gamma                 90
_cell_volume                      1633.1(2)
_cell_formula_units_Z             4
_cell_measurement_temperature     195
_cell_measurement_reflns_used     3281
_cell_measurement_theta_min       4.4110
_cell_measurement_theta_max       74.2520
 
_exptl_crystal_description        rhombus
_exptl_crystal_colour             blue
_exptl_crystal_density_meas       ?
_exptl_crystal_density_method     ?
_exptl_crystal_density_diffrn     1.671          
_exptl_crystal_F_000              820
_exptl_transmission_factor_min    ?
_exptl_transmission_factor_max    ?
_exptl_crystal_size_max           0.120
_exptl_crystal_size_mid           0.100
_exptl_crystal_size_min           0.060
_exptl_absorpt_coefficient_mu     2.431
_shelx_estimated_absorpt_T_min    0.462
_shelx_estimated_absorpt_T_max    0.634
_exptl_absorpt_correction_type    multi-scan
_exptl_absorpt_correction_T_min   0.29948
_exptl_absorpt_correction_T_max   1.00000
_exptl_absorpt_process_details    ?
_exptl_absorpt_special_details    ?
_diffrn_ambient_temperature       195
_diffrn_radiation_wavelength      1.54184
_diffrn_radiation_type            CuK\a
_diffrn_source                    ?
_diffrn_measurement_device_type   'XtaLAB Pro: Kappa single'
_diffrn_measurement_method        ?
_diffrn_detector_area_resol_mean  ?
_diffrn_reflns_number             7937
_diffrn_reflns_av_unetI/netI      0.0527
_diffrn_reflns_av_R_equivalents   0.0607
_diffrn_reflns_limit_h_min        -11
_diffrn_reflns_limit_h_max        13
_diffrn_reflns_limit_k_min        -14
_diffrn_reflns_limit_k_max        13
_diffrn_reflns_limit_l_min        -17
_diffrn_reflns_limit_l_max        13
_diffrn_reflns_theta_min          4.422
_diffrn_reflns_theta_max          74.695
_diffrn_reflns_theta_full         67.684
_diffrn_measured_fraction_theta_max   0.960
_diffrn_measured_fraction_theta_full  0.994
_diffrn_reflns_Laue_measured_fraction_max    0.960
_diffrn_reflns_Laue_measured_fraction_full   0.994
_diffrn_reflns_point_group_measured_fraction_max   0.960
_diffrn_reflns_point_group_measured_fraction_full  0.994
_reflns_number_total              3214
_reflns_number_gt                 2490
_reflns_threshold_expression      'I > 2\s(I)'
_reflns_Friedel_coverage          0.000
_reflns_Friedel_fraction_max      .
_reflns_Friedel_fraction_full     .
 
_reflns_special_details
;
 Reflections were merged by SHELXL according to the crystal
 class for the calculation of statistics and refinement.
 
 _reflns_Friedel_fraction is defined as the number of unique
 Friedel pairs measured divided by the number that would be
 possible theoretically, ignoring centric projections and
 systematic absences.
;
 
_computing_data_collection        ?
_computing_cell_refinement        ?
_computing_data_reduction         ?
_computing_structure_solution     'SHELXT 2014/5 (Sheldrick, 2014)'
_computing_structure_refinement 'SHELXL-2016/6 (Sheldrick, 2016)'
_computing_molecular_graphics     ?
_computing_publication_material   ?
_refine_special_details           ?
_refine_ls_structure_factor_coef  Fsqd
_refine_ls_matrix_type            full
_refine_ls_weighting_scheme       calc
_refine_ls_weighting_details
'w=1/[\s^2^(Fo^2^)+(0.1490P)^2^+1.9093P] where P=(Fo^2^+2Fc^2^)/3'
_atom_sites_solution_primary      ?
_atom_sites_solution_secondary    ?
_atom_sites_solution_hydrogens    geom
_refine_ls_hydrogen_treatment     constr
_refine_ls_extinction_method      none
_refine_ls_extinction_coef        .
_refine_ls_number_reflns          3214
_refine_ls_number_parameters      235
_refine_ls_number_restraints      2
_refine_ls_R_factor_all           0.0939
_refine_ls_R_factor_gt            0.0780
_refine_ls_wR_factor_ref          0.2265
_refine_ls_wR_factor_gt           0.2068
_refine_ls_goodness_of_fit_ref    1.061
_refine_ls_restrained_S_all       1.061
_refine_ls_shift/su_max           0.001
_refine_ls_shift/su_mean          0.000
 
loop_
 _atom_site_label
 _atom_site_type_symbol
 _atom_site_fract_x
 _atom_site_fract_y
 _atom_site_fract_z
 _atom_site_U_iso_or_equiv
 _atom_site_adp_type
 _atom_site_occupancy
 _atom_site_site_symmetry_order  
 _atom_site_calc_flag
 _atom_site_refinement_flags_posn
 _atom_site_refinement_flags_adp
 _atom_site_refinement_flags_occupancy
 _atom_site_disorder_assembly
 _atom_site_disorder_group
Cu1 Cu 1.09600(6) 0.07827(6) 0.51250(5) 0.0355(3) Uani 1 1 d . . . . .
O1 O 0.9748(3) 0.1662(3) 0.5664(3) 0.0433(8) Uani 1 1 d . . . . .
O2 O 0.8058(3) 0.0372(3) 0.5399(3) 0.0456(8) Uani 1 1 d . . . . .
F1 F 0.1733(3) 0.5423(3) 0.5072(3) 0.0694(11) Uani 1 1 d . . . . .
O3 O 0.9821(3) 0.3816(3) 0.8773(3) 0.0451(8) Uani 1 1 d . . . . .
O4 O 0.8143(3) 0.5105(3) 0.8565(2) 0.0446(8) Uani 1 1 d . . . . .
N1 N 0.2197(4) 0.2322(4) 0.5233(3) 0.0409(9) Uani 1 1 d . . . . .
C1 C 0.8617(4) 0.1346(4) 0.5687(4) 0.0393(10) Uani 1 1 d . . . . .
C2 C 0.7893(4) 0.2198(4) 0.6126(4) 0.0403(10) Uani 1 1 d . . . . .
C4 C 0.7946(5) 0.3637(4) 0.7364(4) 0.0398(10) Uani 1 1 d . . . . .
C3 C 0.8602(4) 0.2861(5) 0.6933(4) 0.0424(11) Uani 1 1 d . . . . .
H3 H 0.952702 0.278585 0.718897 0.051 Uiso 1 1 calc R U . . .
C7 C 0.6500(4) 0.2309(4) 0.5744(4) 0.0414(10) Uani 1 1 d . . . . .
H7 H 0.601726 0.184027 0.521928 0.050 Uiso 1 1 calc R U . . .
C5 C 0.6567(5) 0.3786(5) 0.6968(4) 0.0410(10) Uani 1 1 d . . . . .
H5 H 0.613028 0.432409 0.724610 0.049 Uiso 1 1 calc R U . . .
C6 C 0.5837(4) 0.3116(5) 0.6144(4) 0.0404(10) Uani 1 1 d . . . . .
C8 C 0.8693(5) 0.4245(4) 0.8299(4) 0.0408(10) Uani 1 1 d . . . . .
C9 C 0.4360(4) 0.3248(5) 0.5746(4) 0.0406(10) Uani 1 1 d . . . . .
C13 C 0.3745(5) 0.4341(5) 0.5581(4) 0.0459(12) Uani 1 1 d . . . . .
H13 H 0.424948 0.502626 0.569750 0.055 Uiso 1 1 calc R U . . .
C10 C 0.3530(4) 0.2262(4) 0.5554(4) 0.0406(10) Uani 1 1 d . . . . .
H10 H 0.392755 0.152479 0.565468 0.049 Uiso 1 1 calc R U . . .
C12 C 0.2357(5) 0.4381(5) 0.5239(5) 0.0513(13) Uani 1 1 d . . . . .
C11 C 0.1616(5) 0.3373(5) 0.5064(4) 0.0471(12) Uani 1 1 d . . . . .
H11 H 0.068830 0.342148 0.482185 0.057 Uiso 1 1 calc R U . . .
O6 O 0.5728(10) 0.6731(8) 0.6908(7) 0.134(3) Uani 1 1 d . . . . .
C14 C 0.6816(12) 0.6992(10) 0.7050(8) 0.101(3) Uani 1 1 d . . . . .
O5 O 0.7843(11) 0.7273(15) 0.7174(10) 0.209(7) Uani 1 1 d . . . . .
O7 O 0.655(3) 0.981(2) 0.698(2) 0.358(18) Uani 1 1 d D . . . .
C15 C 0.757(3) 0.974(6) 0.750(3) 0.63(7) Uani 1 1 d D . . . .
O8 O 0.862(3) 1.0054(11) 0.7732(11) 0.272(12) Uani 1 1 d D . . . .
 
loop_
 _atom_site_aniso_label
 _atom_site_aniso_U_11
 _atom_site_aniso_U_22
 _atom_site_aniso_U_33
 _atom_site_aniso_U_23
 _atom_site_aniso_U_13
 _atom_site_aniso_U_12
Cu1 0.0223(4) 0.0410(4) 0.0376(4) 0.0000(3) 0.0017(3) 0.0000(2)
O1 0.0267(15) 0.0482(19) 0.055(2) -0.0085(15) 0.0129(14) -0.0011(13)
O2 0.0291(15) 0.051(2) 0.055(2) -0.0125(16) 0.0100(15) -0.0020(15)
F1 0.0369(16) 0.0467(18) 0.117(3) 0.0110(19) 0.0132(18) 0.0063(14)
O3 0.0319(16) 0.0518(19) 0.0427(18) -0.0069(15) -0.0005(14) 0.0046(14)
O4 0.0292(15) 0.052(2) 0.0445(18) -0.0090(15) 0.0004(14) 0.0039(14)
N1 0.0250(17) 0.045(2) 0.046(2) 0.0001(17) 0.0026(15) -0.0028(15)
C1 0.027(2) 0.045(3) 0.040(2) -0.0012(19) 0.0038(18) 0.0003(18)
C2 0.028(2) 0.046(3) 0.044(2) -0.001(2) 0.0061(18) 0.0028(18)
C4 0.030(2) 0.044(3) 0.038(2) 0.0016(19) 0.0007(18) -0.0003(18)
C3 0.027(2) 0.049(3) 0.045(3) -0.003(2) 0.0033(19) -0.0010(19)
C7 0.027(2) 0.048(3) 0.041(2) -0.005(2) -0.0008(18) -0.0020(18)
C5 0.030(2) 0.044(2) 0.045(3) -0.006(2) 0.0067(19) -0.0008(19)
C6 0.025(2) 0.049(3) 0.041(2) -0.005(2) 0.0030(18) -0.0041(18)
C8 0.029(2) 0.045(3) 0.042(2) -0.0052(19) 0.0038(19) -0.0024(18)
C9 0.026(2) 0.049(3) 0.041(2) -0.006(2) 0.0025(18) -0.0028(19)
C13 0.029(2) 0.046(3) 0.058(3) -0.001(2) 0.007(2) -0.0017(19)
C10 0.025(2) 0.045(2) 0.046(2) 0.000(2) 0.0036(18) 0.0016(18)
C12 0.030(2) 0.050(3) 0.066(3) 0.003(2) 0.005(2) 0.006(2)
C11 0.027(2) 0.046(3) 0.060(3) 0.003(2) 0.003(2) 0.0029(19)
O6 0.120(6) 0.125(7) 0.136(7) -0.010(5) 0.011(5) -0.011(5)
C14 0.089(7) 0.101(7) 0.101(7) 0.006(5) 0.015(6) -0.010(6)
O5 0.113(7) 0.319(18) 0.166(10) 0.126(11) 0.004(7) -0.041(9)
O7 0.46(3) 0.25(2) 0.54(4) 0.24(3) 0.40(3) 0.15(2)
C15 1.02(18) 0.61(11) 0.55(9) 0.40(8) 0.66(12) 0.40(10)
O8 0.62(4) 0.115(8) 0.176(10) 0.057(8) 0.255(16) 0.098(14)
 
_geom_special_details
;
 All esds (except the esd in the dihedral angle between two l.s. planes)
 are estimated using the full covariance matrix.  The cell esds are taken
 into account individually in the estimation of esds in distances, angles
 and torsion angles; correlations between esds in cell parameters are only
 used when they are defined by crystal symmetry.  An approximate (isotropic)
 treatment of cell esds is used for estimating esds involving l.s. planes.
;
 
loop_
 _geom_bond_atom_site_label_1
 _geom_bond_atom_site_label_2
 _geom_bond_distance
 _geom_bond_site_symmetry_2
 _geom_bond_publ_flag
Cu1 O2 1.967(4) 3_756 ?
Cu1 O1 1.968(3) . ?
Cu1 O4 1.969(3) 2_746 ?
Cu1 O3 1.977(3) 4_565 ?
Cu1 N1 2.163(4) 1_655 ?
Cu1 Cu1 2.6376(13) 3_756 ?
O1 C1 1.257(6) . ?
O2 C1 1.264(6) . ?
F1 C12 1.341(6) . ?
O3 C8 1.265(6) . ?
O4 C8 1.259(6) . ?
N1 C11 1.333(7) . ?
N1 C10 1.334(6) . ?
C1 C2 1.494(7) . ?
C2 C3 1.383(7) . ?
C2 C7 1.401(6) . ?
C4 C3 1.384(7) . ?
C4 C5 1.393(6) . ?
C4 C8 1.490(7) . ?
C3 H3 0.9300 . ?
C7 C6 1.386(7) . ?
C7 H7 0.9300 . ?
C5 C6 1.409(7) . ?
C5 H5 0.9300 . ?
C6 C9 1.486(6) . ?
C9 C13 1.390(7) . ?
C9 C10 1.398(7) . ?
C13 C12 1.389(7) . ?
C13 H13 0.9300 . ?
C10 H10 0.9300 . ?
C12 C11 1.368(8) . ?
C11 H11 0.9300 . ?
O6 C14 1.140(14) . ?
C14 O5 1.089(14) . ?
O7 C15 1.102(10) . ?
C15 O8 1.103(10) . ?
 
loop_
 _geom_angle_atom_site_label_1
 _geom_angle_atom_site_label_2
 _geom_angle_atom_site_label_3
 _geom_angle
 _geom_angle_site_symmetry_1
 _geom_angle_site_symmetry_3
 _geom_angle_publ_flag
O2 Cu1 O1 168.27(15) 3_756 . ?
O2 Cu1 O4 87.12(16) 3_756 2_746 ?
O1 Cu1 O4 90.02(16) . 2_746 ?
O2 Cu1 O3 90.61(16) 3_756 4_565 ?
O1 Cu1 O3 89.92(16) . 4_565 ?
O4 Cu1 O3 168.44(15) 2_746 4_565 ?
O2 Cu1 N1 100.97(15) 3_756 1_655 ?
O1 Cu1 N1 90.71(15) . 1_655 ?
O4 Cu1 N1 98.94(15) 2_746 1_655 ?
O3 Cu1 N1 92.62(15) 4_565 1_655 ?
O2 Cu1 Cu1 88.36(11) 3_756 3_756 ?
O1 Cu1 Cu1 80.21(10) . 3_756 ?
O4 Cu1 Cu1 88.70(10) 2_746 3_756 ?
O3 Cu1 Cu1 79.90(11) 4_565 3_756 ?
N1 Cu1 Cu1 168.17(11) 1_655 3_756 ?
C1 O1 Cu1 127.4(3) . . ?
C1 O2 Cu1 117.7(3) . 3_756 ?
C8 O3 Cu1 127.4(3) . 4_566 ?
C8 O4 Cu1 117.8(3) . 2_756 ?
C11 N1 C10 118.8(4) . . ?
C11 N1 Cu1 119.0(3) . 1_455 ?
C10 N1 Cu1 121.9(3) . 1_455 ?
O1 C1 O2 126.2(5) . . ?
O1 C1 C2 116.3(4) . . ?
O2 C1 C2 117.5(4) . . ?
C3 C2 C7 119.7(4) . . ?
C3 C2 C1 119.7(4) . . ?
C7 C2 C1 120.6(4) . . ?
C3 C4 C5 120.3(4) . . ?
C3 C4 C8 120.1(4) . . ?
C5 C4 C8 119.4(4) . . ?
C2 C3 C4 120.5(4) . . ?
C2 C3 H3 119.8 . . ?
C4 C3 H3 119.8 . . ?
C6 C7 C2 120.3(4) . . ?
C6 C7 H7 119.8 . . ?
C2 C7 H7 119.8 . . ?
C4 C5 C6 119.6(5) . . ?
C4 C5 H5 120.2 . . ?
C6 C5 H5 120.2 . . ?
C7 C6 C5 119.5(4) . . ?
C7 C6 C9 121.0(4) . . ?
C5 C6 C9 119.4(4) . . ?
O4 C8 O3 125.8(4) . . ?
O4 C8 C4 118.2(4) . . ?
O3 C8 C4 116.0(4) . . ?
C13 C9 C10 117.3(4) . . ?
C13 C9 C6 122.1(4) . . ?
C10 C9 C6 120.5(4) . . ?
C12 C13 C9 118.2(5) . . ?
C12 C13 H13 120.9 . . ?
C9 C13 H13 120.9 . . ?
N1 C10 C9 123.5(5) . . ?
N1 C10 H10 118.2 . . ?
C9 C10 H10 118.2 . . ?
F1 C12 C11 119.5(5) . . ?
F1 C12 C13 119.6(5) . . ?
C11 C12 C13 120.9(5) . . ?
N1 C11 C12 121.3(4) . . ?
N1 C11 H11 119.3 . . ?
C12 C11 H11 119.3 . . ?
O5 C14 O6 177.9(15) . . ?
O7 C15 O8 148(6) . . ?
 
loop_
 _geom_torsion_atom_site_label_1
 _geom_torsion_atom_site_label_2
 _geom_torsion_atom_site_label_3
 _geom_torsion_atom_site_label_4
 _geom_torsion
 _geom_torsion_site_symmetry_1
 _geom_torsion_site_symmetry_2
 _geom_torsion_site_symmetry_3
 _geom_torsion_site_symmetry_4
 _geom_torsion_publ_flag
Cu1 O1 C1 O2 2.9(8) . . . . ?
Cu1 O1 C1 C2 -179.0(3) . . . . ?
Cu1 O2 C1 O1 0.8(7) 3_756 . . . ?
Cu1 O2 C1 C2 -177.3(3) 3_756 . . . ?
O1 C1 C2 C3 -37.6(7) . . . . ?
O2 C1 C2 C3 140.7(5) . . . . ?
O1 C1 C2 C7 144.1(5) . . . . ?
O2 C1 C2 C7 -37.6(7) . . . . ?
C7 C2 C3 C4 -0.2(8) . . . . ?
C1 C2 C3 C4 -178.6(5) . . . . ?
C5 C4 C3 C2 -2.1(8) . . . . ?
C8 C4 C3 C2 173.0(5) . . . . ?
C3 C2 C7 C6 2.8(8) . . . . ?
C1 C2 C7 C6 -178.9(5) . . . . ?
C3 C4 C5 C6 1.9(8) . . . . ?
C8 C4 C5 C6 -173.2(5) . . . . ?
C2 C7 C6 C5 -2.9(8) . . . . ?
C2 C7 C6 C9 179.8(5) . . . . ?
C4 C5 C6 C7 0.6(8) . . . . ?
C4 C5 C6 C9 178.0(5) . . . . ?
Cu1 O4 C8 O3 -4.9(7) 2_756 . . . ?
Cu1 O4 C8 C4 172.8(3) 2_756 . . . ?
Cu1 O3 C8 O4 8.1(8) 4_566 . . . ?
Cu1 O3 C8 C4 -169.6(3) 4_566 . . . ?
C3 C4 C8 O4 166.1(5) . . . . ?
C5 C4 C8 O4 -18.8(7) . . . . ?
C3 C4 C8 O3 -15.9(7) . . . . ?
C5 C4 C8 O3 159.1(5) . . . . ?
C7 C6 C9 C13 -135.9(6) . . . . ?
C5 C6 C9 C13 46.8(7) . . . . ?
C7 C6 C9 C10 46.4(7) . . . . ?
C5 C6 C9 C10 -130.9(5) . . . . ?
C10 C9 C13 C12 -0.1(8) . . . . ?
C6 C9 C13 C12 -177.8(5) . . . . ?
C11 N1 C10 C9 1.6(8) . . . . ?
Cu1 N1 C10 C9 -172.1(4) 1_455 . . . ?
C13 C9 C10 N1 -0.6(8) . . . . ?
C6 C9 C10 N1 177.2(5) . . . . ?
C9 C13 C12 F1 -179.9(5) . . . . ?
C9 C13 C12 C11 -0.3(9) . . . . ?
C10 N1 C11 C12 -1.9(8) . . . . ?
Cu1 N1 C11 C12 171.9(5) 1_455 . . . ?
F1 C12 C11 N1 -179.1(6) . . . . ?
C13 C12 C11 N1 1.3(9) . . . . ?
 
_refine_diff_density_max    0.966
_refine_diff_density_min   -0.823
_refine_diff_density_rms    0.159

_shelx_res_file
;
TITL 20170926-ymh-1_a.res in P2(1)/c
    20170926-YMH-1.res
    created by SHELXL-2016/6 at 20:52:13 on 26-Sep-2017
CELL 1.54184 10.557019 11.403491 14.323928 90 108.7247 90
ZERR 19 0.000807 0.00094 0.00119 0 0.0086 0
LATT 1
SYMM -X,0.5+Y,0.5-Z
SFAC C  H  N  O  F  Cu
UNIT 19 19 19 19 19 19
L.S. 20
ACTA
BOND $H
FMAP 2
PLAN 20
LIST 6
SIZE 0.06 0.1 0.12
DFIX 1.1 0.01 C15 O7
DFIX 1.1 0.01 C15 O8
CONF
MORE -1
WGHT    0.149000    1.909300
FVAR       0.53438
CU1   6    1.095996    0.078267    0.512501    11.00000    0.02231    0.04105 =
         0.03758   -0.00001    0.00168    0.00003
O1    4    0.974774    0.166180    0.566384    11.00000    0.02675    0.04824 =
         0.05487   -0.00847    0.01287   -0.00114
O2    4    0.805813    0.037190    0.539864    11.00000    0.02907    0.05083 =
         0.05459   -0.01247    0.01001   -0.00195
F1    5    0.173348    0.542257    0.507170    11.00000    0.03689    0.04671 =
         0.11655    0.01100    0.01322    0.00633
O3    4    0.982114    0.381584    0.877310    11.00000    0.03192    0.05176 =
         0.04267   -0.00690   -0.00054    0.00458
O4    4    0.814306    0.510510    0.856457    11.00000    0.02924    0.05200 =
         0.04446   -0.00900    0.00045    0.00393
N1    3    0.219733    0.232154    0.523346    11.00000    0.02499    0.04530 =
         0.04598    0.00011    0.00256   -0.00276
C1    1    0.861715    0.134615    0.568724    11.00000    0.02722    0.04530 =
         0.04038   -0.00124    0.00383    0.00034
C2    1    0.789343    0.219796    0.612602    11.00000    0.02762    0.04568 =
         0.04385   -0.00132    0.00612    0.00280
C4    1    0.794559    0.363681    0.736356    11.00000    0.02959    0.04412 =
         0.03844    0.00157    0.00070   -0.00031
C3    1    0.860236    0.286136    0.693335    11.00000    0.02689    0.04940 =
         0.04491   -0.00319    0.00329   -0.00097
AFIX  43
H3    2    0.952702    0.278585    0.718897    11.00000   -1.20000
AFIX   0
C7    1    0.649987    0.230945    0.574401    11.00000    0.02688    0.04787 =
         0.04115   -0.00542   -0.00081   -0.00205
AFIX  43
H7    2    0.601726    0.184027    0.521928    11.00000   -1.20000
AFIX   0
C5    1    0.656667    0.378592    0.696831    11.00000    0.03029    0.04419 =
         0.04463   -0.00613    0.00665   -0.00078
AFIX  43
H5    2    0.613028    0.432409    0.724610    11.00000   -1.20000
AFIX   0
C6    1    0.583691    0.311570    0.614441    11.00000    0.02548    0.04942 =
         0.04094   -0.00527    0.00303   -0.00412
C8    1    0.869250    0.424467    0.829918    11.00000    0.02949    0.04492 =
         0.04244   -0.00519    0.00376   -0.00241
C9    1    0.435986    0.324825    0.574556    11.00000    0.02621    0.04858 =
         0.04118   -0.00611    0.00250   -0.00277
C13   1    0.374521    0.434098    0.558138    11.00000    0.02911    0.04610 =
         0.05763   -0.00091    0.00718   -0.00165
AFIX  43
H13   2    0.424948    0.502626    0.569750    11.00000   -1.20000
AFIX   0
C10   1    0.352968    0.226190    0.555368    11.00000    0.02534    0.04456 =
         0.04622   -0.00008    0.00362    0.00163
AFIX  43
H10   2    0.392755    0.152479    0.565468    11.00000   -1.20000
AFIX   0
C12   1    0.235711    0.438141    0.523913    11.00000    0.03046    0.05041 =
         0.06553    0.00292    0.00483    0.00617
C11   1    0.161623    0.337271    0.506402    11.00000    0.02744    0.04558 =
         0.06021    0.00268    0.00264    0.00293
AFIX  43
H11   2    0.068830    0.342148    0.482185    11.00000   -1.20000
AFIX   0
O6    4    0.572775    0.673094    0.690756    11.00000    0.11972    0.12537 =
         0.13583   -0.00957    0.01118   -0.01134
C14   1    0.681601    0.699233    0.705035    11.00000    0.08912    0.10095 =
         0.10125    0.00648    0.01459   -0.01024
O5    4    0.784341    0.727305    0.717430    11.00000    0.11253    0.31929 =
         0.16596    0.12634    0.00439   -0.04117
O7    4    0.654765    0.980934    0.698479    11.00000    0.46134    0.24842 =
         0.53672    0.24367    0.40312    0.15474
C15   1    0.757314    0.974328    0.750418    11.00000    1.01737    0.60870 =
         0.54661    0.39867    0.66406    0.40260
O8    4    0.861703    1.005422    0.773184    11.00000    0.61723    0.11521 =
         0.17570    0.05666    0.25486    0.09841
HKLF 4


REM  20170926-ymh-1_a.res in P2(1)/c
REM R1 =  0.0780 for    2490 Fo > 4sig(Fo)  and  0.0939 for all    3214 data
REM    235 parameters refined using      2 restraints

END

WGHT      0.1488      1.9245

REM Highest difference peak  0.966,  deepest hole -0.823,  1-sigma level  0.159
Q1    1   1.1089  0.0193  0.4695  11.00000  0.05    0.97
Q2    1   1.0381  0.0673  0.5627  11.00000  0.05    0.89
Q3    1   1.1046  0.0216  0.5574  11.00000  0.05    0.88
Q4    1   1.1111  0.1349  0.4729  11.00000  0.05    0.87
Q5    1   0.8384  0.0180  0.4920  11.00000  0.05    0.86
Q6    1   1.0756  0.1279  0.5577  11.00000  0.05    0.77
Q7    1   0.1544  0.1587  0.5053  11.00000  0.05    0.70
Q8    1   1.0471  0.1624  0.5264  11.00000  0.05    0.65
Q9    1   0.0937  0.4243  0.5020  11.00000  0.05    0.60
Q10   1   0.1020  0.4166  0.5756  11.00000  0.05    0.59
Q11   1   0.1781  0.5572  0.5890  11.00000  0.05    0.59
Q12   1   0.8852  0.5764  0.8932  11.00000  0.05    0.58
Q13   1   0.8456  0.0350  0.5694  11.00000  0.05    0.56
Q14   1   0.9601  0.2005  0.6017  11.00000  0.05    0.53
Q15   1   1.0287 -0.0253  0.5111  11.00000  0.05    0.52
Q16   1   0.8113  0.0891  0.5927  11.00000  0.05    0.51
Q17   1   0.8121  0.4378  0.8956  11.00000  0.05    0.45
Q18   1   1.0010  0.2346  0.5471  11.00000  0.05    0.44
Q19   1   0.1716  0.3146  0.6027  11.00000  0.05    0.43
Q20   1   0.1659  0.2563  0.5627  11.00000  0.05    0.40
;
_shelx_res_checksum   36702

_shelx_hkl_file
;
   0   0  -2 6141.79  237.54
   0   0  -3    4.78    4.08
   0   0  -4 6925.74  268.57
   0   0  -5    0.22    4.33
   0   0  -6  951.59   32.99
   0   0   6  681.22   31.61
   0   0  -7    0.41    2.94
   0   0   7    0.58    3.55
   0   0   7   -0.05    4.26
   0   0  -7   -0.79    2.83
   0   0  -8  179.56    8.50
   0   0  -8  194.95    8.38
   0   0  -9    0.90    4.14
   0   0  -9    2.36    3.84
   0   0 -10  248.61   11.21
   0   0 -10  233.31   11.63
   0   0 -11    3.21    5.40
   0   0 -11    4.69    4.69
   0   0 -12   21.15    5.27
   0   0 -13    2.10    4.10
   0   0 -13   -4.84    4.98
   0   0 -14   60.49    5.76
   0   0 -14   59.66    5.07
   0   0 -15    2.22    4.61
   0   0 -15   -1.25    3.02
   0   0 -16   52.24    4.52
   0  -1   1 2632.71  102.10
   0   1   2 3654.43  142.38
   0  -1   3  230.45   10.82
   0   1  -3  215.17   11.07
   0  -1  -4 5367.47  206.22
   0   1   4 5871.28  207.25
   0  -1   4 5596.73  206.39
   0  -1   5   12.22    1.92
   0  -1  -5   17.18    4.83
   0   1   5   16.17    5.15
   0   1   6  684.87   25.27
   0   1   6  700.99   26.41
   0   1  -7 1172.45   45.91
   0   1   7 1114.35   48.17
   0  -1  -7 1155.40   45.77
   0   1   7  994.31   49.07
   0   1  -8   46.47    3.95
   0   1  -8   39.98    4.37
   0  -1  -8   33.77    3.82
   0  -1  -9    4.69    4.12
   0   1  -9    4.52    3.81
   0   1  -9    2.02    4.28
   0  -1  -9    5.36    3.75
   0  -1 -10    5.57    4.37
   0  -1 -10    8.12    4.92
   0   1 -10   22.41    5.34
   0   1 -10   32.15    4.56
   0  -1 -11   10.30    4.69
   0  -1 -11    7.30    5.41
   0   1 -11    9.26    5.76
   0   1 -11    8.22    4.64
   0   1 -12    5.38    4.49
   0   1 -12    8.32    5.16
   0  -1 -12   12.19    5.19
   0  -1 -12   12.35    4.27
   0   1 -13   32.77    5.52
   0  -1 -13   28.29    5.29
   0  -1 -13   33.72    4.62
   0   1 -13   26.65    4.49
   0  -1 -14   10.12    4.06
   0  -1 -14   11.07    4.67
   0   1 -14   14.41    4.99
   0  -1 -15    3.10    3.40
   0   1 -15    5.31    4.76
   0  -1 -15    6.74    4.41
   0   1 -16   18.05    3.56
   0  -1 -16   17.60    3.80
   0  -1 -16   12.58    2.71
   0   2   0  415.09   17.76
   0   2  -1  428.39   18.23
   0  -2  -2  771.13   28.01
   0  -2   2  584.69   26.16
   0   2  -3  439.69   16.75
   0  -2   3  386.47   16.98
   0   2   4 1266.26   54.50
   0  -2   4 1365.67   54.10
   0   2   4 1428.94   55.44
   0   2   5  823.32   34.94
   0  -2   5  782.01   34.16
   0   2   6 1241.50   56.36
   0   2   6 1314.70   57.25
   0   2  -7  606.59   24.87
   0  -2  -7  622.22   24.53
   0   2   7  650.94   28.56
   0   2   7  573.54   28.87
   0  -2  -7  601.40   24.77
   0   2  -8  548.61   24.74
   0  -2  -8  606.54   24.29
   0  -2  -8  580.63   24.49
   0   2  -9   39.80    5.41
   0  -2  -9   42.37    3.81
   0  -2  -9   40.71    4.52
   0   2 -10    9.01    5.32
   0  -2 -10    3.04    4.38
   0  -2 -10    3.78    3.38
   0  -2 -11   38.94    5.16
   0   2 -11   34.58    6.09
   0   2 -12   18.78    5.39
   0  -2 -12   22.63    4.36
   0   2 -13   34.18    5.42
   0  -2 -13   31.73    4.60
   0   2 -14    2.95    5.07
   0  -2 -14    2.50    3.79
   0  -2 -15   88.46    5.95
   0  -2 -15   82.82    5.34
   0   2 -15   75.69    5.79
   0  -2 -16    0.73    3.13
   0  -2 -16   -2.00    2.58
   0   3   0    4.97    6.88
   0   3   1    0.83    5.59
   0   3  -1    3.59    6.37
   0  -3  -2  536.85   24.67
   0   3   3 1441.69   39.32
   0  -3  -3  594.26   37.39
   0   3  -4  120.21    5.71
   0  -3   4  127.05    8.67
   0  -3   5  771.37   32.71
   0   3   5  765.28   33.49
   0  -3  -6  940.68   35.67
   0  -3  -6  851.78   37.05
   0  -3   6  818.49   37.83
   0  -3  -6  943.92   35.53
   0   3   6  901.16   39.37
   0  -3  -6  870.16   35.53
   0   3  -7   38.25    3.41
   0  -3  -7   31.71    3.47
   0   3   7   33.71    7.26
   0  -3  -7   32.52    3.04
   0  -3  -8  220.94    9.79
   0  -3  -8  214.79   10.05
   0   3  -8  230.37   10.12
   0  -3  -9   19.50    3.75
   0   3  -9   43.46    4.75
   0  -3  -9   18.88    4.49
   0   3  -9   57.34    6.19
   0   3 -10  179.96    9.15
   0   3 -10  154.52    8.52
   0  -3 -10  145.03    7.63
   0  -3 -10  175.40    8.78
   0  -3 -11   -0.05    5.02
   0  -3 -11   -1.23    4.39
   0  -3 -11    1.74    3.38
   0   3 -12   42.45    5.56
   0  -3 -12   35.64    3.85
   0  -3 -12   45.80    5.32
   0  -3 -12   43.49    4.65
   0   3 -13    1.97    5.30
   0  -3 -13    1.56    3.85
   0  -3 -14   95.25    5.90
   0  -3 -15   -0.92    3.20
   0  -3 -16   41.34    3.23
   0   4   0  167.68   11.59
   0   4   1  372.76   18.80
   0  -4  -2  215.58   13.64
   0  -4   2  197.29   11.22
   0  -4  -3    1.22    6.40
   0   4   3    0.57    5.26
   0  -4  -4   -1.42    4.52
   0   4  -4    0.62    2.85
   0   4   4    4.87    5.89
   0   4   5   39.82    7.38
   0   4  -5   39.41    3.34
   0  -4  -5   37.68    2.92
   0  -4   5   39.60    7.08
   0   4  -6   21.47    3.25
   0  -4   6   17.31    6.25
   0  -4  -6   21.01    2.80
   0  -4  -6   22.69    2.73
   0  -4  -6   21.37    3.05
   0   4   6   20.30    7.24
   0  -4  -7    9.92    3.01
   0   4   7   11.72    7.52
   0   4  -7    4.85    3.59
   0  -4  -7   10.60    3.20
   0  -4  -7    6.60    2.78
   0  -4  -8   20.99    3.88
   0  -4  -8   19.55    3.50
   0  -4  -8   23.65    3.79
   0  -4  -9  312.13   13.70
   0   4   9  319.46   13.36
   0  -4  -9  297.84   13.24
   0  -4  -9  315.22   13.55
   0  -4 -10   84.18    6.28
   0  -4 -10   71.23    5.09
   0   4 -11  196.34   10.25
   0  -4 -11  215.22   10.26
   0  -4 -12   38.37    4.82
   0  -4 -12   34.85    3.73
   0  -4 -13  111.49    6.87
   0  -4 -14   -5.84    4.04
   0  -4 -14   -7.11    3.67
   0  -4 -15   43.59    3.74
   0  -4 -15   42.62    4.28
   0  -4 -16   11.07    2.31
   0  -4 -16    9.86    2.74
   0   5   0    0.10    6.32
   0   5   1  524.08   25.64
   0  -5  -2   57.60    9.63
   0  -5   2   63.74    7.31
   0   5   2   72.60    8.87
   0  -5  -3   51.08    8.93
   0  -5  -3   51.37    3.08
   0   5  -3   58.90    3.83
   0   5   4  353.48   20.58
   0   5  -4  322.58   15.45
   0   5  -4  315.49   17.11
   0  -5  -5  687.93   27.66
   0  -5  -5  710.25   27.93
   0   5   5  748.99   33.89
   0  -5  -6   64.79    4.14
   0  -5  -6   65.21    4.50
   0  -5  -7  207.86    9.41
   0  -5  -7  219.46    9.70
   0  -5  -7  208.73    9.50
   0  -5  -8  386.81   15.89
   0  -5  -8  375.72   15.96
   0  -5  -8  371.57   15.75
   0  -5  -9  343.71   14.98
   0  -5  -9  351.13   15.34
   0   5  -9  359.15   15.88
   0   5   9  360.55   15.12
   0  -5  -9  366.19   15.26
   0   5  10  229.01   10.07
   0  -5 -10  214.48   10.43
   0  -5 -10  205.70    9.80
   0  -5 -10  216.98   10.29
   0   5 -10  218.53   10.94
   0   5 -11  158.85    8.94
   0  -5 -11  171.14    8.03
   0  -5 -11  174.72    8.57
   0  -5 -11  170.50    8.58
   0  -5 -12  117.55    6.81
   0  -5 -12  110.60    6.04
   0  -5 -13    6.10    4.00
   0  -5 -13    4.96    3.03
   0  -5 -14    2.28    3.77
   0  -5 -15    6.17    3.03
   0   6   0  248.50   10.86
   0  -6   1  258.01   14.41
   0   6   1  232.10   10.40
   0  -6  -2 1000.22   51.69
   0   6   2 1239.63   47.15
   0   6   2 1354.97   53.44
   0  -6  -2 1165.41   46.60
   0  -6  -2 1190.80   46.71
   0  -6   2 1493.03   51.87
   0  -6  -3   18.16    9.28
   0   6   3   27.93    8.35
   0  -6   3   30.42    7.73
   0  -6  -3   22.86    2.63
   0   6   3   25.27    3.99
   0  -6  -3   19.07    2.37
   0   6  -3   20.25    3.31
   0  -6  -4  774.40   29.99
   0  -6  -4  780.36   30.35
   0  -6  -4  756.75   29.86
   0   6  -4  718.14   30.30
   0   6  -5   32.05    4.26
   0  -6  -5   34.70    3.38
   0  -6  -5   39.02    4.18
   0  -6  -5   36.88    3.34
   0   6  -6  680.51   27.92
   0  -6  -6  691.71   27.44
   0  -6  -6  686.26   27.67
   0   6  -7    8.87    4.53
   0  -6  -7    6.55    3.47
   0  -6  -7    7.36    3.77
   0  -6  -8  190.22    9.01
   0  -6  -8  190.66    8.94
   0  -6  -8  180.10    9.08
   0   6   8  189.01    9.01
   0   6  -8  192.31    9.92
   0  -6  -9   81.77    5.90
   0  -6  -9   89.33    5.82
   0   6   9   94.04    5.87
   0   6  -9   92.08    6.96
   0  -6  -9   87.49    5.57
   0   6  10  119.59    6.21
   0   6 -10  110.18    7.18
   0  -6 -10  108.66    6.24
   0  -6 -10   93.41    6.25
   0  -6 -10  106.26    5.92
   0  -6 -11   56.73    5.03
   0   6  11   69.12    4.86
   0  -6 -11   61.10    4.43
   0  -6 -11   63.42    4.75
   0   6 -11   58.01    5.57
   0  -6 -12   27.07    3.93
   0  -6 -12   21.79    3.47
   0  -6 -12   22.25    4.06
   0  -6 -13    0.24    2.83
   0  -6 -13   -3.68    3.78
   0  -6 -13    0.02    3.15
   0  -6 -14   -2.92    2.82
   0  -6 -14   -4.63    3.10
   0  -6 -15   -0.27    1.97
   0   7   0   -1.69    3.47
   0  -7   0    1.10    7.27
   0   7  -1  393.01   15.33
   0   7   1  396.69   15.21
   0  -7  -2  197.90    8.46
   0  -7  -2  246.58    8.23
   0   7  -3  598.26   23.70
   0   7   3  632.63   23.95
   0  -7  -3  604.29   23.18
   0  -7  -4  158.75    8.60
   0   7  -4  132.04    8.48
   0  -7  -5  534.44   21.05
   0   7  -5  530.42   21.64
   0  -7  -5  530.15   21.40
   0  -7  -5  489.96   20.91
   0  -7  -6  124.90    6.55
   0  -7  -6  125.05    7.07
   0   7  -6  124.28    7.64
   0  -7  -6  130.29    6.69
   0   7  -7  261.46   12.02
   0  -7  -7  237.33   10.92
   0   7  -8    0.93    5.14
   0   7   8    0.55    4.04
   0  -7  -8    0.40    3.64
   0  -7  -9  158.29    7.94
   0   7  -9  183.39    9.23
   0  -7  -9  149.07    8.08
   0  -7  -9  154.70    7.93
   0   7   9  189.56    8.28
   0  -7 -10    2.27    3.25
   0   7  10    0.27    3.47
   0  -7 -10    1.69    3.61
   0   7 -10    4.63    4.58
   0  -7 -10   -1.44    3.19
   0  -7 -11   88.63    5.36
   0   7 -11   98.14    6.67
   0  -7 -11   89.49    5.82
   0   7  11  108.03    5.70
   0  -7 -11   91.29    5.55
   0  -7 -12   18.69    3.18
   0   7  12   21.77    3.23
   0  -7 -12   19.94    3.35
   0  -7 -12   21.04    4.02
   0  -7 -13   26.00    3.13
   0  -7 -13   22.28    3.15
   0  -7 -14    7.09    2.15
   0   8   0  249.74   11.59
   0  -8  -1   27.78    3.17
   0   8  -1    7.98    4.81
   0   8   2  667.49   25.78
   0  -8  -2  601.65   25.11
   0  -8  -3    8.19    3.62
   0  -8  -3    5.34    4.60
   0  -8  -4  239.73   11.90
   0  -8  -4  264.85   11.44
   0   8  -4  280.71   12.47
   0  -8  -5   73.01    5.13
   0   8  -5   74.90    6.63
   0  -8  -5   73.92    5.87
   0  -8  -6  274.48   12.44
   0   8  -6  284.38   13.21
   0  -8  -6  271.84   12.11
   0  -8  -7   -0.43    3.27
   0   8  -7   -1.73    5.25
   0  -8  -7   -1.05    3.86
   0   8   7   -1.79    3.99
   0  -8  -7    1.87    3.58
   0  -8  -8   15.72    3.27
   0   8  -8   17.16    5.12
   0   8   8   17.59    3.96
   0   8   9   65.27    4.71
   0   8  -9   59.61    6.10
   0   8 -10   85.54    6.54
   0   8  10   92.47    5.27
   0  -8 -10   75.68    4.98
   0  -8 -10   71.19    4.93
   0  -8 -11   45.87    3.88
   0   8 -11   50.62    5.17
   0  -8 -11   47.21    4.08
   0   8  12   34.51    3.03
   0  -8 -12   29.78    3.08
   0  -8 -12   30.44    3.19
   0  -8 -13   41.39    2.88
   0   9   0    3.94    4.91
   0   9   1  136.39    8.13
   0   9  -1  136.03    8.08
   0   9   2   12.71    5.33
   0  -9  -2   15.58    3.91
   0  -9  -3    3.85    3.69
   0  -9  -3   -0.54    4.96
   0   9  -4   28.60    6.01
   0  -9  -4   33.39    5.16
   0  -9  -4   37.43    4.26
   0   9  -5   69.91    6.74
   0  -9  -5   68.45    5.62
   0   9   5   76.81    5.36
   0  -9  -5   68.06    4.93
   0  -9  -6   10.53    3.45
   0   9  -6   -1.09    5.19
   0  -9  -6    5.00    3.94
   0  -9  -7   11.02    3.44
   0  -9  -7   10.07    3.62
   0   9  -7   12.29    5.27
   0  -9  -8   14.66    3.54
   0   9  -8   13.52    5.30
   0   9   8   13.51    3.86
   0  -9  -9    7.53    3.08
   0   9  -9    0.73    4.72
   0   9  10   91.65    4.98
   0   9 -10   85.62    6.06
   0   9 -11    4.51    3.29
   0  -9 -11    7.45    2.58
   0  -9 -11    5.93    2.31
   0   9  11   10.63    2.81
   0   9  12  102.08    4.79
   0  10   0   11.95    5.03
   0  10   0    9.99    3.75
   0  10   1    1.69    4.95
   0  10   1    0.26    3.75
   0  10  -1    0.52    4.83
   0 -10  -2   79.59    6.12
   0  10   2   77.07    5.39
   0 -10  -3   74.25    5.06
   0 -10  -3   90.38    6.08
   0  10   3   89.01    5.55
   0  10   4   67.07    4.94
   0 -10  -4   64.85    5.35
   0 -10  -4   58.02    4.52
   0  10  -5   -1.32    4.96
   0 -10  -5   -2.60    3.26
   0  10   5    0.98    3.67
   0 -10  -5   -4.30    3.90
   0  10   6    5.74    3.79
   0  10  -6    7.57    5.01
   0 -10  -6    7.56    3.67
   0 -10  -6    5.23    3.19
   0 -10  -7    2.80    3.17
   0  10  -7    2.53    4.95
   0  10   8   15.08    3.38
   0  10  -8   11.64    4.64
   0 -10  -8    9.95    3.06
   0  10   9   19.61    3.29
   0 -10  -9   15.32    3.01
   0  10  -9    9.43    4.42
   0  10  10   10.23    2.63
   0  10 -10   10.39    3.44
   0  10  11   91.01    4.53
   0  11   0   -6.98    5.01
   0 -11   0   -3.16    5.09
   0 -11  -1    5.09    4.66
   0  11  -1    7.49    4.81
   0  11   1    0.59    3.50
   0 -11  -2   -6.22    4.73
   0  11   2    0.04    3.60
   0  11  -2   -0.14    4.78
   0 -11  -3   14.01    4.35
   0  11   3   19.75    3.79
   0 -11  -4   99.75    6.05
   0  11   4  107.51    5.78
   0 -11  -5  186.86    8.74
   0  11  -5  184.43    9.49
   0  11   5  197.01    8.56
   0 -11  -5  162.10    8.34
   0 -11  -6   28.64    3.59
   0  11  -6   28.41    4.73
   0 -11  -6   23.88    3.49
   0  11   6   32.00    3.62
   0 -11  -7   66.80    4.38
   0  11  -7   74.50    5.55
   0 -11  -8   10.25    2.62
   0  11  -8    8.29    3.75
   0 -11   8   12.28    5.05
   0 -11  -9   17.43    2.64
   0  11   9   27.86    2.70
   0  11  -9   22.48    3.60
   0  11  10   26.34    2.52
   0 -12   0   13.93    4.82
   0 -12  -1   -2.19    4.29
   0  12   2   92.06    5.32
   0  12  -2   87.14    6.33
   0 -12  -2   88.46    5.88
   0 -12   3   41.66    5.54
   0  12   3   48.97    4.00
   0 -12  -3   35.85    4.29
   0  12   4   46.67    3.83
   0 -12  -4   38.34    4.10
   0 -12   4   43.42    5.58
   0  12   5    4.08    2.89
   0  12  -5    3.51    3.92
   0 -12  -5    3.76    2.93
   0 -12   5    5.35    4.75
   0 -12   6   38.94    5.29
   0  12   6   46.47    3.50
   0  12  -6   43.32    4.41
   0 -12   7    1.63    3.84
   0  12   7    0.27    2.26
   0  12  -7    1.67    3.23
   0  12  -8   12.00    3.03
   0 -13   0    7.02    3.74
   0 -13  -1  132.91    6.82
   0 -13  -2   -4.10    3.02
   0 -13  -3   31.94    3.21
   0  13   3   30.19    2.68
   0 -13   3   32.82    4.24
   0  13   4    1.63    2.12
   0 -13   4    4.60    3.74
   0 -13  -4    2.98    2.15
   0  13   5   34.69    2.71
   0 -13   5   32.06    4.00
   0 -13   6    3.71    3.10
   0  13   6    3.78    1.92
   0 -14   0   24.04    2.77
   0 -14  -1   10.20    2.25
   0 -14   3    7.41    2.28
   1   0 -16   76.34    5.63
   1   0 -15    0.40    4.50
   1   0 -15   -1.59    3.36
   1   0 -14  241.36   11.12
   1   0 -14  239.23   11.63
   1   0 -13    0.86    3.99
   1   0 -13   -1.86    5.00
   1   0 -12  159.24    8.98
   1   0 -12  137.18    8.16
   1   0 -11   -0.93    4.80
   1   0 -11   -6.29    5.28
   1   0 -10  461.74   20.58
   1   0 -10  518.73   20.48
   1   0  -9    6.00    3.82
   1   0  -9    7.01    3.70
   1   0  -8 4737.89  183.38
   1   0  -8 4888.42  183.25
  -1   0   7    1.99    3.76
  -1   0   6 1159.68   47.22
  -1   0   5    2.05    3.65
  -1   0   4 5663.60  219.32
  -1   0   3    3.14    2.56
  -1   0   2 2071.21   80.84
  -1   0   1    0.87    1.79
   1   0   0 9805.43  382.67
  -1   0   0 9999.00  382.63
  -1   0  -2 5729.99  221.96
  -1   0  -3    4.66    5.39
  -1   0  -4  100.51    7.75
  -1   0  -5   -1.48    5.64
   1   0   6 1441.49   67.91
  -1   0  -6 1871.79   67.77
  -1   0  -7    6.60    6.23
   1   0   7   -0.11    6.64
  -1   0  -7    1.93    2.94
  -1   0  -7   -0.33    3.30
  -1   0  -8   13.44    4.04
  -1   0  -8   18.25    7.02
  -1   0  -8   16.75    3.54
   1   0   8    9.86    7.50
  -1   0  -9    2.56    4.55
  -1   0  -9   -0.86    3.94
  -1   0 -10   -8.31    4.68
  -1   0 -10   -3.44    5.15
  -1   0 -11    0.50    4.67
  -1   0 -11    3.38    5.44
  -1   0 -12    5.10    4.26
  -1   0 -12    4.17    5.07
  -1   0 -13   -0.55    4.99
  -1   0 -13    1.17    4.00
  -1   0 -14   38.68    5.72
  -1   0 -14   41.84    4.50
  -1   0 -15    2.26    4.28
  -1   0 -16    4.86    3.10
   1  -1 -17   19.98    3.14
   1  -1 -16   15.76    3.01
   1   1 -16   23.33    3.97
   1  -1 -15   80.11    5.96
   1  -1 -15   75.70    5.26
   1   1 -15   83.09    6.13
   1  -1 -14    3.07    4.13
   1  -1 -14    6.48    4.85
   1   1 -14   -3.74    4.94
   1  -1 -13   78.87    5.73
   1  -1 -13   81.93    6.67
   1   1 -13   77.86    5.70
   1   1 -13   84.47    6.69
   1  -1 -12    9.42    5.47
   1   1 -12    8.58    5.60
   1  -1 -12    4.99    4.71
   1   1 -12   14.92    4.56
   1   1 -11  137.35    7.66
   1  -1 -11  133.97    7.79
   1   1 -11  131.11    8.33
   1  -1 -11  133.72    8.21
   1   1 -10    5.81    4.48
   1   1 -10    0.56    4.84
   1  -1 -10   -1.15    4.25
   1  -1 -10   -4.52    4.59
   1  -1  -9   80.29    5.42
   1   1  -9   95.96    5.76
   1  -1  -9   75.81    5.61
   1   1  -9   82.84    5.94
  -1   1   8    3.43    5.32
   1   1  -8    1.29    3.33
   1  -1  -8    3.59    3.02
   1  -1  -7  356.57   14.14
  -1  -1   7  353.55   16.22
  -1  -1   6    4.33    3.46
  -1   1   6    7.81    4.23
  -1   1   5 1109.71   47.08
  -1  -1   5 1166.03   47.01
  -1  -1   5 1255.51   47.15
  -1   1   4 2952.00  115.68
  -1  -1   4 2862.96  115.83
  -1  -1   4 3106.59  115.97
  -1  -1   3   63.86    4.40
  -1   1   3   39.65    3.34
   1   1  -2 1563.79   61.09
  -1  -1   2 1552.04   61.06
  -1   1   1 4466.97  175.56
   1   1  -1 4826.75  176.25
  -1   1   0  370.11   14.96
   1   1   1 8229.47  299.26
  -1  -1  -1 8244.96  299.27
   1   1   2  895.49   38.16
   1   1   3 1268.00   43.91
  -1   1  -3  920.22   41.64
  -1   1  -4 1024.27   43.50
   1   1   4 1130.81   44.97
   1   1   5 1508.68   61.69
  -1  -1  -5 1451.80   60.05
  -1   1  -5 1525.24   60.48
  -1  -1  -6 1864.99   72.65
  -1   1  -6 1873.64   75.39
   1   1   6 1716.43   76.61
  -1  -1  -6 1974.02   75.46
  -1   1  -7  134.01    6.45
  -1  -1  -7  151.34   10.29
  -1   1  -7  130.41    6.84
  -1  -1  -7  131.68    6.45
  -1   1  -8  165.42    7.64
  -1   1  -8  157.90    8.08
  -1  -1  -8  158.59    7.59
  -1   1  -9   -2.11    4.76
  -1   1  -9   -2.46    4.21
  -1  -1  -9   -4.16    3.95
  -1  -1  -9    0.11    4.66
  -1  -1 -10   25.78    5.22
  -1   1 -10   23.47    4.96
  -1   1 -10   25.30    5.73
  -1  -1 -10   27.81    4.67
  -1   1 -10   26.46    4.44
  -1   1 -11   -4.45    4.83
  -1   1 -11   -3.69    5.70
  -1  -1 -11   -3.78    4.61
  -1  -1 -11   -1.07    5.25
  -1  -1 -12   35.38    4.73
  -1  -1 -12   34.61    5.52
  -1   1 -12   36.38    4.74
  -1   1 -12   28.54    5.41
  -1  -1 -13   -0.43    4.10
  -1  -1 -13   -3.36    5.02
  -1   1 -13   -1.64    4.12
  -1   1 -13   -0.43    5.43
  -1  -1 -14   55.65    4.82
  -1   1 -14   58.98    5.87
  -1  -1 -14   65.18    6.02
  -1   1 -15   -1.27    4.10
  -1  -1 -15   -0.19    3.00
  -1  -1 -15   -1.01    4.11
  -1  -1 -16    1.99    3.16
   1  -2 -17   15.98    2.86
   1  -2 -16    6.30    2.68
   1  -2 -16    9.39    3.79
   1  -2 -15   36.73    4.74
   1   2 -15   45.96    5.17
   1  -2 -15   34.44    4.30
   1   2 -14   27.24    5.18
   1  -2 -14   26.48    4.15
   1   2 -13    1.03    4.97
   1  -2 -13    3.49    4.15
   1  -2 -12   46.71    5.22
   1   2 -12   45.63    6.10
   1  -2 -11    0.19    4.69
   1   2 -11   20.00    6.15
   1  -2 -10   78.89    5.20
   1  -2 -10   87.59    5.90
   1   2 -10   85.23    6.68
   1   2  -9  166.87    8.78
   1  -2  -9  168.37    7.71
   1  -2  -9  167.49    8.14
   1  -2  -8   38.29    3.60
   1  -2  -8   42.79    3.26
   1   2  -8   40.03    4.04
   1  -2  -7    0.43    2.46
   1  -2  -7   -0.24    2.58
  -1   2   7    1.60    5.73
  -1   2   6  179.20   10.40
  -1  -2   6  179.76   10.00
  -1  -2   5   88.63    6.56
   1  -2  -5   67.07    3.95
  -1  -2   4   71.58    6.14
   1   2  -4   78.32    4.90
   1   2  -3  796.69   32.16
   1   2  -2 4620.51  179.56
   1  -2  -1   12.17    2.70
   1  -2   0 3005.53  117.04
  -1  -2  -1   15.12    5.11
  -1   2  -1   10.92    4.42
   1  -2   1   17.52    4.90
  -1  -2  -1   21.44    7.89
   1   2   2  320.08   15.70
  -1  -2  -2  262.68   17.50
   1   2   3 2326.78   91.07
   1   2   3 2194.43   89.26
   1   2   4 1668.91   57.29
   1   2   4 1549.47   58.68
   1   2   5 3412.60  140.07
   1   2   5 3581.88  138.80
   1   2   6  378.93   21.69
  -1  -2  -6  319.04   18.86
   1   2   7  601.41   35.24
  -1   2  -7  832.16   30.68
  -1  -2  -7  814.76   30.70
  -1   2  -7  678.38   30.63
  -1  -2  -7  741.95   33.78
  -1  -2  -7  782.84   30.29
  -1   2  -8  260.38   10.45
  -1  -2  -8  235.60   10.26
  -1   2  -8  228.52   10.17
  -1   2  -8  196.68   10.50
  -1  -2  -8  218.76    9.80
  -1  -2  -9  274.45   12.27
  -1   2  -9  281.19   13.19
  -1  -2  -9  285.28   12.70
  -1   2  -9  308.22   12.83
  -1   2  -9  307.66   13.02
  -1  -2 -10    0.02    4.26
  -1   2 -10    3.87    5.71
  -1   2 -10    3.44    4.46
  -1   2 -10    4.43    4.68
  -1  -2 -10   -1.99    3.69
  -1   2 -11   36.38    4.86
  -1   2 -11   41.69    6.18
  -1   2 -11   39.15    5.09
  -1  -2 -11   41.12    5.00
  -1  -2 -12   -1.61    4.11
  -1   2 -12    1.52    5.30
  -1  -2 -13   38.46    4.73
  -1   2 -13   45.56    6.05
  -1   2 -14   -2.25    4.99
  -1  -2 -14   -7.92    3.81
  -1  -2 -15   37.01    4.50
  -1  -2 -15   43.83    4.00
  -1  -2 -16    0.15    3.00
   1  -3 -16   10.65    2.82
   1  -3 -15    2.98    3.30
   1  -3 -14   35.62    4.26
   1   3 -13   19.22    5.11
   1  -3 -13   -0.21    3.92
   1  -3 -12   -3.76    4.96
   1  -3 -12   -6.15    4.50
   1   3 -12   -4.62    4.94
   1  -3 -11   57.99    4.77
   1  -3 -11   65.62    6.11
   1  -3 -11   64.74    5.76
   1   3 -11   74.92    6.76
   1   3 -10    1.57    5.27
   1  -3 -10   -4.96    4.58
   1  -3  -9   -0.81    3.29
   1  -3  -9    1.67    3.84
   1  -3  -8    9.52    3.44
   1  -3  -8   18.23    3.15
  -1   3   8    3.83    6.14
   1  -3  -7   33.91    3.33
  -1  -3   7   35.67    6.34
   1  -3  -7   37.83    3.02
  -1   3   7   33.94    6.97
  -1  -3   6   24.72    4.85
  -1  -3   6   32.73    7.12
   1  -3  -6   58.83    3.65
   1  -3  -6   73.57    3.56
  -1  -3   5  187.00   10.13
  -1  -3   5  174.51   10.38
  -1  -3   4 1308.18   56.63
   1   3  -4 1398.87   55.91
  -1  -3   3 3106.89   53.27
   1   3  -3 3010.84   51.22
  -1  -3   2 1109.67   45.90
  -1  -3   1 3349.42  132.85
   1  -3  -1 3382.07  131.21
   1  -3   0   11.61    4.60
  -1  -3   0    0.51    5.48
   1  -3   1  130.54    8.05
  -1   3  -1  124.99    8.17
  -1  -3  -1  152.25   12.51
  -1   3  -2  401.79   19.33
   1  -3   2  395.10   19.22
  -1  -3  -3   75.08    9.00
   1   3   3  149.19    9.35
   1   3   4  653.73   29.58
  -1  -3  -5 1142.46   45.35
   1   3   5 1292.25   49.40
  -1  -3  -6  473.75   19.89
  -1   3  -6  488.68   19.87
   1   3   6  460.06   19.61
  -1  -3  -6  535.68   19.71
  -1  -3  -6  497.18   19.79
   1   3   7  462.74   19.46
  -1  -3  -7  523.82   19.51
  -1  -3  -7  450.91   19.75
  -1   3  -7  493.08   19.83
   1   3   8  580.39   23.65
  -1   3  -8  552.27   24.18
  -1  -3  -8  576.91   24.00
  -1   3  -8  617.47   24.21
  -1  -3  -8  615.58   23.65
  -1   3  -9    2.25    4.66
  -1  -3  -9    2.26    3.36
  -1   3  -9   -0.77    5.34
  -1  -3  -9    0.90    4.44
  -1   3 -10  315.26   13.63
  -1  -3 -10  288.05   13.38
  -1   3 -10  307.28   13.99
  -1  -3 -10  277.69   12.62
  -1  -3 -11   34.10    4.72
  -1  -3 -11   32.24    5.23
  -1   3 -11   36.86    6.39
  -1   3 -11   31.42    4.84
  -1  -3 -11   35.85    3.89
  -1  -3 -12   97.59    6.91
  -1   3 -12   97.97    7.57
  -1  -3 -12   99.52    6.30
  -1   3 -13    3.47    5.19
  -1  -3 -13    3.34    3.91
  -1  -3 -14  145.12    7.30
  -1  -3 -15   21.14    3.23
   1  -4 -16    5.85    2.44
   1  -4 -16    8.40    3.08
   1  -4 -15   -0.49    3.09
   1  -4 -15    2.14    3.34
   1  -4 -14    2.15    3.58
   1  -4 -14    7.47    4.10
   1  -4 -13    1.15    4.28
   1  -4 -13    3.81    2.90
   1  -4 -12  121.68    6.86
   1  -4 -12   87.30    5.49
   1  -4 -11   10.51    5.00
   1  -4 -11   12.01    3.77
   1  -4 -10    3.17    4.45
  -1   4  10    3.04    3.90
   1  -4 -10    0.88    3.68
   1   4  -9   36.81    4.67
   1  -4  -9   41.62    4.34
   1  -4  -9   38.51    4.57
   1  -4  -9   37.12    4.13
   1  -4  -8   38.68    3.97
   1  -4  -8   32.06    4.18
   1  -4  -7   78.14    4.76
   1  -4  -7   83.86    4.48
   1  -4  -7   80.57    4.39
   1  -4  -7   75.18    4.57
  -1   4   7   67.92    8.79
   1  -4  -6   11.55    2.54
  -1  -4   6   12.20    6.87
   1  -4  -6   17.45    2.39
   1   4  -6   10.35    2.83
  -1   4   6    9.43    6.14
   1  -4  -6   10.94    2.58
   1  -4  -6   13.67    2.40
   1  -4  -5   62.29    3.60
  -1   4   5   64.43    7.90
  -1  -4   4   25.45    5.49
   1   4  -4   24.20    4.70
  -1  -4   4   21.27    5.81
  -1  -4   3  326.01   14.39
   1  -4  -3  224.82   14.09
  -1  -4   2  534.41   24.24
  -1   4   1  167.27   11.19
  -1  -4   1  166.73   11.08
  -1   4   0  439.48   23.71
   1  -4   0  606.39   23.10
   1  -4   1  839.53   35.26
  -1   4  -1  834.84   36.29
  -1  -4  -1  913.79   38.02
  -1  -4  -2  949.40   40.50
   1  -4   2  889.84   37.86
   1   4   3    4.39    5.90
   1  -4   3    0.90    5.22
  -1  -4  -3   -2.51    7.92
  -1   4  -4   40.96    3.27
   1   4   4   40.37    7.27
  -1   4  -5  947.49   36.64
  -1  -4  -5  947.83   36.56
  -1  -4  -5  905.05   36.41
  -1  -4  -5  917.88   36.45
  -1  -4  -6   -1.54    3.16
  -1   4  -6    2.71    3.30
  -1  -4  -6   -2.81    2.95
  -1  -4  -6   -3.93    3.10
   1   4   6    4.32    2.65
  -1   4  -7 1026.20   39.77
  -1  -4  -7  994.99   39.46
  -1  -4  -7 1013.98   39.57
   1   4   7  970.86   39.36
  -1  -4  -7 1002.70   39.34
  -1  -4  -8   61.08    4.49
  -1  -4  -8   64.30    5.29
   1   4   8   67.06    4.70
  -1  -4  -8   67.40    4.98
  -1   4  -8   69.10    5.71
  -1   4  -9  767.74   30.24
  -1  -4  -9  743.86   29.71
  -1  -4  -9  732.26   29.86
  -1  -4  -9  678.17   29.44
   1   4   9  789.78   29.63
  -1  -4 -10    0.59    3.66
  -1  -4 -10    4.84    4.77
  -1  -4 -11  438.39   17.81
  -1  -4 -11  398.22   17.17
  -1  -4 -12   23.92    4.75
  -1   4 -12    7.12    4.07
  -1  -4 -13  179.68    9.28
  -1  -4 -14    0.63    3.11
  -1  -4 -14   -2.11    4.03
  -1  -4 -15   79.99    5.05
  -1  -4 -15   77.20    4.55
   1  -5 -16    0.63    2.37
   1  -5 -16    2.17    1.95
   1  -5 -15   18.57    3.57
   1  -5 -14    0.50    3.60
   1  -5 -13   87.03    5.77
   1  -5 -13   81.57    4.95
   1  -5 -12   99.37    6.30
   1  -5 -12   89.02    5.34
   1  -5 -11  102.25    6.51
   1  -5 -11  102.86    6.60
  -1   5  11  107.47    6.15
   1  -5 -11  100.71    5.85
   1  -5 -10  258.90   11.38
  -1   5  10  248.69   11.15
   1  -5 -10  232.38   11.35
   1  -5 -10  242.69   11.00
   1   5 -10  238.55   11.54
   1   5  -9  215.70   10.72
   1  -5  -9  236.52   10.38
   1  -5  -9  223.38   10.13
   1  -5  -9  215.22   10.41
   1  -5  -8   19.63    3.56
   1   5  -8    6.97    4.22
   1  -5  -8   12.38    3.55
   1  -5  -8   11.54    3.88
   1   5  -7  103.58    5.90
   1  -5  -7   90.12    5.11
   1  -5  -7   93.71    5.36
   1  -5  -7   80.49    5.15
   1   5  -6   19.12    3.52
   1  -5  -6   15.41    2.59
   1  -5  -6   19.17    2.88
   1   5  -5 1399.67   52.87
   1   5  -5 1362.72   54.60
   1  -5  -5 1295.88   52.55
   1   5  -4  224.49    9.17
   1   5  -4  225.93   12.08
   1  -5  -4  213.23    8.73
  -1   5   3  137.23   10.46
   1  -5  -3  139.42   10.86
   1  -5  -3  123.36    5.43
   1  -5  -2   33.70    5.03
  -1   5   2    5.59    5.97
   1  -5  -1  801.22   31.24
  -1   5   1  638.33   32.54
   1  -5   0  305.11   14.05
  -1   5   0  226.84   15.46
   1  -5   1  510.80   22.31
  -1  -5  -1  436.15   24.24
  -1   5  -1  496.77   23.84
  -1  -5  -2   17.60    8.92
   1  -5   2   19.01    6.99
  -1  -5  -3  386.36   15.15
   1  -5   3  387.93   18.65
  -1  -5  -3  353.93   14.79
   1  -5   4   77.68    8.19
  -1  -5  -4   79.05    4.38
  -1  -5  -4   91.81    5.02
  -1  -5  -5  197.66    9.06
  -1  -5  -5  207.78    9.31
  -1  -5  -5  208.04    8.95
  -1  -5  -6   22.05    3.60
   1   5   6   23.34    3.46
  -1  -5  -6   21.27    3.81
  -1  -5  -7  195.09    8.83
  -1  -5  -7  181.51    8.88
   1   5   7  197.95    8.80
  -1  -5  -7  200.52    9.11
  -1  -5  -7  177.72    8.61
  -1  -5  -8  143.24    7.57
  -1  -5  -8  141.41    7.28
   1   5   8  151.07    7.29
  -1  -5  -8  130.05    6.95
  -1  -5  -9   43.60    5.09
   1   5   9   46.89    4.63
  -1  -5  -9   41.28    4.60
  -1  -5  -9   41.57    4.39
  -1  -5 -10  100.97    6.21
  -1  -5 -10  110.54    6.62
  -1  -5 -10  114.27    6.96
  -1  -5 -11    9.68    3.45
  -1  -5 -11   12.38    4.27
  -1  -5 -11    9.95    3.91
  -1   5 -11   13.18    4.74
  -1  -5 -12  104.59    5.97
  -1   5 -12   97.20    6.64
  -1  -5 -12  118.54    6.46
  -1  -5 -12  115.75    6.85
  -1  -5 -13   13.05    4.39
  -1  -5 -14   22.85    3.70
  -1  -5 -15    0.94    2.59
   1  -6 -15    8.04    2.69
   1  -6 -15    6.11    2.35
   1  -6 -14   22.99    3.66
   1  -6 -14   25.06    3.26
   1  -6 -13   -0.83    3.58
   1  -6 -13    1.52    2.85
   1  -6 -13    2.53    3.27
   1  -6 -12  170.82    8.61
   1  -6 -12  162.68    8.13
  -1   6  11    5.73    3.58
   1  -6 -11    5.92    3.78
   1  -6 -11    5.48    3.82
   1  -6 -11    7.41    3.25
  -1   6  10  446.75   17.83
   1   6 -10  435.41   18.37
   1  -6 -10  390.53   17.83
   1  -6 -10  429.32   17.89
   1  -6 -10  427.08   17.68
   1  -6  -9   68.56    5.57
   1  -6  -9   62.50    5.49
   1   6  -9   79.91    6.36
   1  -6  -9   75.83    5.35
   1  -6  -8  749.63   29.69
   1  -6  -8  752.94   29.76
   1  -6  -8  722.16   29.77
   1   6  -8  743.95   30.23
   1  -6  -7  202.63    9.32
   1   6  -7  217.80    9.98
   1  -6  -7  198.53    9.24
   1  -6  -6 1557.91   61.08
   1   6  -6 1573.52   61.49
   1  -6  -5   46.28    3.66
   1  -6  -5   53.94    4.45
   1  -6  -5   47.14    3.58
   1   6  -5   49.57    4.40
   1   6  -4  638.92   27.67
   1  -6  -4  702.79   27.36
  -1   6   4  644.97   27.98
   1  -6  -4  735.80   27.29
   1  -6  -3    7.36    2.28
  -1   6   3    5.76    3.37
   1  -6  -3    7.32    2.10
  -1   6   3    3.85    7.17
   1  -6  -3    0.61    4.89
   1  -6  -3    3.62    7.78
  -1  -6   3    5.41    7.59
   1   6  -3    8.02    3.15
   1   6  -2  358.31   21.26
  -1   6   2  397.04   25.97
  -1   6   2  438.82   21.35
  -1   6   1   21.45    3.55
  -1   6   1   11.45    8.75
  -1   6   0  433.47   18.90
  -1   6   0  447.68   24.38
  -1  -6  -1   67.52   11.27
   1  -6   1  111.97    9.58
   1   6   1   95.71    5.40
  -1   6  -1   85.30    5.11
   1  -6   2   87.71    9.37
  -1  -6  -2   66.97   10.58
  -1  -6  -2   81.39    4.45
   1   6   2   90.46    5.50
  -1  -6  -3  283.12   11.92
   1  -6   3  304.13   16.96
  -1  -6  -3  254.50   18.63
  -1  -6  -3  293.49   12.34
  -1   6  -4   30.61    4.07
  -1  -6  -4   29.62    3.92
  -1  -6  -4   31.16    3.14
  -1   6  -5    6.56    4.18
  -1  -6  -5    7.47    3.76
  -1  -6  -5    6.30    3.05
  -1  -6  -5    5.53    2.98
  -1  -6  -6   26.77    3.76
  -1  -6  -6   23.66    4.00
   1   6   6   24.95    3.79
  -1  -6  -6   27.18    4.26
  -1  -6  -7   16.20    4.21
   1   6   7   17.75    3.81
  -1  -6  -7   19.95    3.71
  -1  -6  -7   19.94    4.08
   1   6   8   25.00    4.24
  -1   6  -8   19.69    5.68
  -1  -6  -8   22.23    4.01
  -1  -6  -8   18.47    4.51
  -1  -6  -8   17.99    3.83
  -1  -6  -9   96.54    6.47
  -1   6  -9  120.81    7.67
  -1  -6  -9  105.16    6.16
   1   6   9  119.32    6.28
  -1  -6  -9   97.08    5.90
  -1   6 -10   38.35    5.48
  -1  -6 -10   35.00    3.88
  -1  -6 -10   41.12    4.26
   1   6  10   42.67    4.29
  -1  -6 -10   33.82    4.46
  -1  -6 -11   64.68    5.28
  -1  -6 -11   64.14    4.85
  -1   6 -11   60.00    5.81
   1   6  11   73.69    4.89
  -1  -6 -11   57.08    4.51
  -1  -6 -12    0.36    4.25
  -1  -6 -12    0.68    3.44
  -1  -6 -12    1.24    3.26
  -1   6 -12    1.16    3.92
  -1  -6 -13   10.96    3.59
  -1  -6 -13   13.87    3.07
  -1  -6 -14   13.85    2.58
  -1  -6 -14   11.36    2.88
   1  -7 -15   -1.07    1.68
   1  -7 -14   37.77    3.11
   1  -7 -14   31.48    2.97
   1  -7 -13   57.98    3.95
   1  -7 -13   64.22    4.15
   1  -7 -13   54.94    4.39
   1  -7 -12   19.62    3.17
  -1   7  12   25.52    3.57
   1  -7 -12   15.26    3.74
   1  -7 -12   22.55    3.46
   1   7 -11  116.32    7.06
   1  -7 -11  116.79    6.33
   1  -7 -11  102.94    6.34
   1  -7 -11  115.58    6.12
  -1   7  11  131.13    6.49
   1  -7 -10    7.76    3.41
   1   7 -10    9.11    4.57
  -1   7  10   11.31    3.78
   1  -7 -10    7.61    3.44
   1  -7 -10    7.74    3.56
   1  -7  -9  152.35    7.57
   1  -7  -9  141.66    7.53
   1  -7  -9  137.73    7.51
   1   7  -9  162.73    8.56
   1   7  -8   42.77    5.70
   1  -7  -8   38.10    4.42
   1   7  -7  799.56   31.69
   1  -7  -7  762.29   31.02
   1   7  -6   22.30    4.77
   1  -7  -6   18.88    4.42
   1  -7  -6   20.77    3.56
   1  -7  -6   16.85    3.66
   1  -7  -5  695.65   28.47
   1  -7  -5  665.69   28.38
   1  -7  -5  739.96   28.56
   1   7  -5  778.82   29.21
   1  -7  -5  753.72   28.95
   1  -7  -4   88.97    5.07
   1  -7  -4   97.82    4.92
   1  -7  -3  260.46   11.15
  -1   7   3  283.28   12.14
   1  -7  -3  260.10   11.37
   1   7  -3  286.48   12.05
   1  -7  -2  537.99   22.65
  -1   7   2  603.71   23.21
   1   7  -2  597.86   23.22
   1  -7  -2  562.52   22.52
   1  -7  -1  159.24    7.32
  -1   7   1  195.97    8.42
  -1   7   0   14.93    3.83
   1   7   0   19.77    3.70
   1  -7   0   22.19    7.63
  -1  -7  -1  143.75    7.06
  -1   7  -1  155.80    7.86
  -1   7  -2  106.73    7.28
   1   7   2  128.81    7.67
  -1  -7  -3  461.83   18.73
  -1  -7  -3  440.25   18.20
  -1  -7  -4  227.27   10.19
  -1  -7  -4  243.61   10.88
  -1   7  -5  152.90    8.36
  -1  -7  -5  155.95    7.88
  -1  -7  -5  139.23    7.09
  -1  -7  -5  144.08    7.16
   1   7   6   21.17    4.11
  -1  -7  -6   20.89    3.74
  -1  -7  -6   19.51    3.64
  -1   7  -6   17.93    5.27
  -1  -7  -6   19.34    4.47
   1   7   7   26.29    4.40
  -1  -7  -7   30.85    4.67
  -1  -7  -7   26.69    3.97
  -1   7  -7   25.80    5.80
   1   7   8   40.52    4.30
  -1  -7  -8   31.24    4.03
  -1   7  -8   32.26    5.72
  -1  -7  -9  100.11    6.02
  -1  -7  -9   98.91    6.47
  -1  -7  -9  101.91    5.96
  -1   7  -9  122.14    7.50
   1   7   9  119.61    6.26
  -1   7 -10    6.19    4.80
   1   7  10    6.15    3.54
  -1  -7 -10    5.22    4.19
  -1  -7 -10    3.83    3.35
  -1  -7 -10    5.93    3.29
  -1  -7 -11    1.50    3.96
   1   7  11   -0.61    3.55
  -1  -7 -11    1.87    3.08
  -1  -7 -11    0.49    3.29
  -1   7 -11    4.40    4.47
  -1  -7 -12    1.08    3.31
  -1   7 -12    1.94    3.51
  -1  -7 -12    1.40    2.95
  -1  -7 -13   -2.96    2.53
  -1  -7 -14    1.37    1.76
   1  -8 -14   19.57    2.06
   1  -8 -13   51.70    3.37
   1  -8 -13   49.73    3.50
  -1   8  12   50.72    3.72
   1  -8 -12   48.61    3.59
   1  -8 -11   24.97    3.47
   1   8 -11   30.20    4.32
   1  -8 -11   22.76    3.56
  -1   8  11   33.48    3.83
   1   8 -10   18.76    4.66
   1  -8 -10   20.71    3.44
  -1   8  10   26.96    3.98
  -1   8   9   87.15    5.67
   1   8  -9   84.81    6.59
   1   8  -8   12.95    4.97
   1  -8  -8   12.08    3.43
   1  -8  -7    5.19    3.54
   1   8  -7    4.58    5.24
   1  -8  -7    1.85    3.91
   1   8  -6  591.39   23.53
   1  -8  -6  547.71   22.90
   1  -8  -6  540.63   22.63
   1  -8  -5   88.29    5.54
   1   8  -5   88.38    6.69
   1  -8  -5   85.56    6.40
   1  -8  -5   85.61    5.20
   1   8  -4  571.84   26.42
   1  -8  -4  631.59   25.89
   1  -8  -3  429.78   18.22
   1  -8  -3  430.05   18.03
   1   8  -3  462.76   18.95
  -1   8   3  480.90   19.08
   1  -8  -2  289.26   13.35
  -1   8   2  242.64   13.84
   1   8  -1  315.13   11.74
  -1   8   1  292.13   12.42
   1   8   0   23.57    4.60
  -1   8   0   18.66    4.63
   1  -8   0   25.10    3.04
   1   8   0   24.49    3.84
  -1  -8  -1   15.66    3.34
   1   8   1   20.43    4.73
  -1   8  -1   12.23    4.79
   1   8   1   21.14    3.76
  -1   8  -2  128.85    7.70
  -1  -8  -2  120.03    6.42
   1   8   2  132.90    6.73
  -1  -8  -2  129.29    7.45
  -1  -8  -3  108.98    5.95
   1   8   3  112.35    6.26
  -1  -8  -3  107.55    6.87
  -1  -8  -4  133.88    7.72
  -1  -8  -4  129.67    6.83
   1   8   4  138.41    7.15
  -1  -8  -5  106.97    6.66
  -1  -8  -5   97.70    5.88
  -1   8  -5  106.44    7.69
  -1   8  -6   24.89    5.77
  -1  -8  -6   22.42    4.64
  -1  -8  -6   24.38    3.98
   1   8   7   23.04    4.06
  -1  -8  -7   19.79    3.99
  -1  -8  -7   21.07    3.68
  -1  -8  -7   16.53    3.46
  -1   8  -7   20.60    5.60
   1   8   8    3.40    3.57
  -1  -8  -8    2.39    3.14
  -1   8  -8   -7.64    5.40
  -1   8  -9   56.75    5.98
  -1  -8  -9   44.63    4.20
   1   8   9   61.48    4.64
  -1   8 -10   35.62    5.30
  -1  -8 -10   29.48    3.63
  -1  -8 -10   28.83    3.64
   1   8  10   37.93    3.81
  -1  -8 -11  104.50    5.60
  -1   8 -11  111.72    6.98
  -1  -8 -11   95.36    5.50
  -1  -8 -12   10.72    2.41
  -1  -8 -13   19.95    2.14
   1  -9 -12   13.33    2.49
  -1   9  12   22.10    2.52
   1  -9 -12   16.59    2.36
   1  -9 -11   -1.98    2.35
  -1   9  10   14.32    3.47
   1  -9 -10    9.98    2.90
   1   9 -10   16.80    4.36
   1   9  -9   58.16    5.51
  -1   9   9   68.60    4.77
  -1   9   8    5.50    3.84
   1  -9  -8    3.37    3.41
   1   9  -8    4.66    4.63
   1   9  -7  276.71   12.83
   1  -9  -7  269.86   11.94
   1  -9  -6   13.06    3.69
   1  -9  -6    9.74    4.04
   1   9  -6   10.37    4.87
   1   9  -5    3.83    5.08
   1  -9  -5    3.77    3.76
   1  -9  -5    3.11    4.47
   1  -9  -4  219.36   10.32
   1  -9  -4  233.54   10.94
   1   9  -4  220.36   11.22
   1   9  -3    1.39    5.10
   1  -9  -3    1.91    3.28
   1  -9  -3    1.51    3.88
   1  -9  -2  184.31    8.83
   1  -9  -2  194.72    9.24
   1  -9  -1   86.19    4.38
  -1   9   1  137.57    6.69
   1   9   0  249.77   11.14
   1   9   0  246.66   11.98
  -1   9   0  244.92   11.99
  -1  -9  -1  112.27    7.44
   1   9   1  120.39    6.65
  -1   9  -1  105.96    7.61
   1   9   1  111.27    7.81
  -1  -9  -2  145.90    8.22
   1   9   2  148.09    7.54
  -1   9  -2  136.74    8.85
  -1  -9  -2  136.14    7.31
   1   9   3   59.34    4.92
  -1  -9  -3   48.98    5.58
  -1  -9  -3   47.68    4.53
  -1  -9  -4  252.23   11.81
   1   9   4  289.10   12.13
  -1  -9  -4  280.71   12.39
  -1   9  -5   40.82    6.18
  -1  -9  -5   34.10    3.86
  -1  -9  -5   33.50    4.53
   1   9   5   35.89    4.41
  -1   9  -6   74.74    6.86
  -1  -9  -6   65.80    5.21
  -1  -9  -6   78.70    4.96
  -1   9  -7    0.03    5.38
  -1  -9  -7    0.70    3.42
  -1  -9  -7    4.49    3.29
  -1   9  -8   58.23    6.53
   1   9   8   73.00    4.92
  -1  -9  -8   57.54    4.51
  -1   9  -9    2.93    5.16
   1   9   9   39.87    3.88
   1   9  10  118.58    5.99
  -1   9 -10  114.30    7.23
  -1   9 -11    7.32    3.41
   1   9  11   10.14    2.44
  -1  10  11    3.18    2.29
   1  10 -10    0.12    3.24
   1 -10 -10    0.69    2.40
  -1  10  10   -0.06    2.73
   1 -10  -9   -0.83    2.92
   1  10  -9    1.75    4.00
  -1  10   9    4.23    3.13
   1  10  -8    1.35    4.16
   1 -10  -8    1.51    3.07
   1 -10  -7    6.42    3.17
   1  10  -7    8.44    4.44
   1 -10  -6    0.39    3.19
  -1  10   6    2.49    3.77
   1 -10  -6    1.64    3.62
   1  10  -6    0.03    4.50
   1 -10  -5  140.74    7.58
   1 -10  -5  128.02    7.01
   1 -10  -4   -2.93    3.28
   1  10  -4   -0.60    4.54
   1 -10  -4    2.03    4.20
   1 -10  -3   -5.52    4.65
   1 -10  -3    3.76    3.29
  -1  10   2    0.45    4.81
  -1  10   1   -3.93    4.79
   1  10   0   -0.45    4.98
   1  10   0    0.42    3.56
  -1  10   0   -5.80    4.97
   1  10   1   14.01    3.79
  -1 -10  -1   18.28    4.81
  -1  10  -1   15.77    5.08
  -1  10  -2    2.25    5.16
  -1 -10  -2    9.09    4.58
   1  10   2    7.09    3.74
  -1 -10  -2    4.64    3.53
  -1 -10  -3  285.49   12.54
   1  10   3  302.95   12.14
  -1 -10  -4    1.71    3.24
   1  10   4    2.04    3.54
  -1 -10  -4   -0.33    3.88
  -1 -10  -5   19.11    4.02
  -1 -10  -5   16.71    3.40
   1  10   5   22.85    3.83
  -1 -10  -6   10.27    3.44
  -1 -10  -6   14.51    3.66
  -1  10  -6   13.44    5.34
  -1 -10  -7   22.18    3.51
  -1 -10  -7   23.75    3.33
  -1  10  -7   23.53    5.43
  -1 -10  -8   -0.64    2.94
   1  10   8   -0.19    3.17
   1  10   9   87.41    4.69
  -1  10  -9   84.16    6.00
  -1  10 -10   -1.04    3.21
   1  10  10   -0.52    2.36
  -1  11  10   -0.19    2.04
   1 -11 -10    0.73    2.00
  -1  11   9   24.85    2.83
   1  11  -9   15.91    3.46
   1 -11  -9   17.46    2.60
   1 -11  -8    3.02    2.56
   1  11  -8    2.12    3.62
  -1 -11   8   -2.82    4.32
   1  11  -7   20.85    4.36
   1 -11  -7   21.60    3.24
  -1 -11   7   32.44    5.72
  -1  11   7   27.87    3.49
   1 -11  -6   17.19    3.21
   1  11  -6   13.79    4.47
  -1 -11   6    8.10    5.46
  -1  11   6   15.00    3.51
   1 -11  -6   12.22    3.36
  -1  11   5   13.02    3.64
   1 -11  -5   10.16    3.22
   1 -11  -5   12.45    3.83
   1  11  -5   17.18    4.59
  -1  11   4   39.55    4.15
   1 -11  -4   37.89    4.58
   1 -11  -4   23.98    3.55
   1  11  -4   33.61    5.12
  -1 -11   3  156.90    8.85
   1 -11  -3  144.40    8.20
  -1  11   3  155.22    7.69
  -1  11   2   56.43    4.79
  -1 -11   2   54.84    6.19
   1 -11  -2   60.36    5.62
  -1  11   1  133.68    8.00
  -1  11   1  135.22    7.10
   1  11   0  140.27    7.15
  -1  11   0  140.75    8.22
   1  11   1   92.14    5.52
  -1  11  -1   83.67    6.60
  -1 -11  -1   82.11    6.29
  -1  11  -2  130.20    8.19
  -1 -11  -2  140.98    7.82
   1  11   2  148.79    7.34
  -1 -11  -3    3.11    3.88
   1  11   3    3.13    3.54
  -1  11  -3    1.52    4.99
  -1 -11  -4  110.56    6.50
  -1 -11  -4  122.77    6.83
  -1 -11  -5   21.68    3.53
  -1 -11  -5   29.44    3.90
   1  11   5   34.14    3.73
  -1  11  -6   35.56    5.00
  -1 -11  -6   31.50    3.50
  -1 -11  -6   34.12    3.66
   1  11   6   40.71    3.74
  -1  11  -7    0.55    4.00
  -1  11  -8   25.58    4.01
  -1  11  -9   -1.08    2.97
   1  11   9    1.13    2.24
  -1 -12   7    1.49    3.75
  -1  12   7    0.35    2.39
   1 -12  -7   -0.69    2.05
  -1 -12   6  116.16    6.81
   1  12  -6  111.92    6.29
  -1  12   6  125.19    5.39
  -1  12   5    8.57    2.89
   1 -12  -5    6.22    2.90
   1  12  -5   10.52    3.91
  -1 -12   5   11.06    4.49
  -1  12   4   58.07    4.18
  -1 -12   4   52.97    5.50
   1 -12  -4   48.29    4.45
   1 -12  -3    7.11    3.94
  -1  12   3   11.07    3.20
  -1 -12   3    9.34    4.77
   1 -12  -2  147.88    7.81
  -1  12   2  143.91    7.14
  -1 -12   2  149.90    8.13
   1 -12  -1   -1.46    4.45
   1 -12   0   28.51    5.05
   1 -12   1    2.28    4.84
   1  12   1    0.79    3.21
  -1 -12  -1    5.25    4.09
  -1  12  -1    3.35    4.29
   1  12   2    0.89    3.10
  -1 -12  -2    4.49    3.63
  -1  12  -2    3.57    4.18
   1  12   3   20.95    3.23
  -1  12  -3   12.66    4.29
  -1 -12  -3   16.05    3.59
   1  12   4   48.79    3.70
  -1 -12  -4   41.00    3.86
  -1 -12  -5   20.78    2.90
   1  12   5   24.15    2.95
   1  12   6    9.56    2.45
  -1 -12  -6    4.17    1.87
  -1  12  -6    8.07    3.57
   1  12   7    0.64    2.18
   1 -12   7   -1.08    4.11
  -1  12  -7    0.26    2.98
  -1  12  -8    0.94    2.54
  -1  13   7   59.34    3.17
  -1  13   6   -0.06    1.96
  -1 -13   6   -0.72    3.24
  -1  13   5   60.85    3.45
  -1 -13   5   58.56    4.52
  -1 -13   4    0.58    3.42
  -1  13   4   -2.32    2.30
   1 -13  -4    0.77    2.25
   1 -13  -3   50.90    3.83
  -1 -13   3   60.52    4.67
   1 -13  -2    5.75    3.13
  -1 -13   2    2.77    3.54
   1 -13  -1   22.09    3.70
  -1 -13   0   30.08    3.77
   1 -13   0   19.82    3.88
  -1 -13  -1   21.46    3.31
   1 -13   1   17.66    4.02
  -1 -13  -2    3.07    2.86
  -1 -13  -3   21.61    2.80
   1  13   3   25.43    2.43
   1 -13   3   21.42    4.16
   1  13   4    0.41    1.99
  -1 -13  -4   -0.91    2.00
   1 -13   4   -0.83    3.64
   1  13   5   16.58    2.10
   1 -13   5   13.73    3.85
  -1 -14   3    2.71    2.10
  -1 -14   2    5.16    2.26
   1 -14  -1    1.96    2.09
  -1 -14   0   16.09    2.31
   1 -14   0   11.47    2.44
  -1 -14  -1    2.62    1.90
   1 -14   1   -2.46    2.35
   2   0 -17    6.53    3.20
   2   0 -16  158.21    8.08
   2   0 -15    7.70    3.75
   2   0 -15    9.13    4.54
   2   0 -14  353.85   15.72
   2   0 -14  386.72   16.53
   2   0 -13    5.50    5.32
   2   0 -13   -0.64    4.26
   2   0 -12  624.81   26.10
   2   0 -12  625.64   25.80
   2   0 -11   -2.32    5.06
   2   0 -11   -0.99    4.72
   2   0 -10  928.21   37.95
   2   0 -10  964.83   37.81
   2   0  -9   -1.04    3.62
   2   0  -9   -6.90    3.86
   2   0  -8  251.45   10.62
  -2   0   8  215.03   13.82
   2   0  -7    0.63    2.21
  -2   0   7   -1.66    4.73
  -2   0   6   31.96    5.57
  -2   0   5    0.15    3.42
  -2   0   5   -1.59    4.18
  -2   0   4 8511.59  330.22
  -2   0   3    3.33    4.07
  -2   0   2 4025.24  157.38
  -2   0   1    2.10    5.35
   2   0  -1    0.86    5.57
  -2   0   1    0.33    2.48
   2   0   0 3690.87  146.26
  -2   0   0 3737.68  146.25
   2   0   0 3973.02  147.93
   2   0   1    3.77    4.05
   2   0   2   84.69    6.34
   2   0   3   -0.55    3.17
   2   0   3   -0.88    5.82
   2   0   4    1.32    3.26
  -2   0  -4    1.86    5.57
   2   0   4    3.03    6.43
   2   0   5    1.99    2.47
   2   0   5   -4.59    6.22
  -2   0  -5   -0.08    5.81
   2   0   6   14.41    7.03
  -2   0  -6   23.43    3.59
  -2   0  -6   29.15    7.60
  -2   0  -6   25.24    3.28
  -2   0  -7   -0.98    3.26
  -2   0  -7   -0.83    6.65
   2   0   7    3.29    7.79
  -2   0  -7    3.09    3.73
  -2   0  -8  284.48   13.25
  -2   0  -8  302.90   12.93
  -2   0  -9    0.15    4.48
  -2   0  -9    0.33    5.12
  -2   0 -10  169.94    9.08
  -2   0 -10  166.06    9.50
  -2   0 -11   -2.06    3.37
  -2   0 -11    3.81    5.44
  -2   0 -11   -2.22    4.49
  -2   0 -12  169.68    8.93
  -2   0 -12  187.49   10.04
  -2   0 -13   -2.30    5.14
  -2   0 -13   -0.07    4.21
  -2   0 -14   57.50    4.66
  -2   0 -14   67.27    5.93
  -2   0 -15   -3.71    3.74
   2  -1 -17   37.52    3.84
   2  -1 -16    4.50    3.06
   2   1 -16    8.25    3.58
   2  -1 -15   95.90    5.92
   2   1 -15  103.42    6.70
   2  -1 -15   96.21    6.58
   2   1 -14   -0.49    4.93
   2  -1 -14   14.09    5.34
   2  -1 -14   12.08    4.40
   2   1 -13  167.47    9.18
   2  -1 -13  158.93    9.03
   2  -1 -13  158.75    8.41
   2   1 -13  145.46    8.03
   2  -1 -12   79.35    6.56
   2   1 -12   81.91    6.32
   2  -1 -12   77.69    6.97
   2   1 -12   87.37    7.12
   2   1 -11  146.98    8.10
   2  -1 -11  142.00    8.20
   2   1 -11  141.94    8.71
   2  -1 -11  145.88    8.33
   2   1 -10  442.77   17.10
   2  -1 -10  397.89   17.15
   2   1 -10  415.06   17.32
   2   1  -9  913.84   37.33
   2   1  -9  958.46   37.10
   2  -1  -9  930.30   37.14
   2   1  -8 1238.89   47.27
  -2  -1   8 1268.50   50.74
  -2   1   8 1157.99   51.43
   2  -1  -8 1163.19   47.30
  -2   1   7  520.63   20.85
  -2  -1   7  557.68   20.11
  -2  -1   6  204.82    9.42
  -2  -1   6  171.63    8.37
  -2  -1   5   62.23    5.38
  -2  -1   5   77.67    6.50
  -2  -1   4  782.93   32.56
  -2  -1   3 1691.93   66.70
   2   1  -3 1672.12   66.60
  -2  -1   2 1479.90   59.20
   2  -1  -2 1308.30   59.03
   2  -1  -1 1285.99   53.13
  -2   1   1 1305.95   52.68
  -2   1   0  267.94   11.48
   2   1   0  246.77   12.00
  -2   1  -1  244.63   10.70
  -2  -1  -2  617.80   28.02
   2   1   2  697.36   30.14
   2   1   3  202.69   13.28
   2   1   4  661.97   29.19
  -2   1  -4  585.43   27.18
  -2  -1  -5  562.70   22.65
   2   1   5  578.38   27.51
  -2   1  -5  608.69   26.43
  -2   1  -6  745.73   31.10
  -2   1  -6  689.41   26.55
  -2   1  -6  613.87   26.75
  -2  -1  -6  620.36   30.12
   2  -1   6  510.52   30.33
  -2   1  -6  592.62   26.54
  -2  -1  -6  739.07   26.63
  -2  -1  -6  732.68   26.57
   2   1   6  602.45   31.78
   2   1   7    1.33    7.89
  -2   1  -7   -3.63    4.11
  -2   1  -7   -0.92    3.48
  -2  -1  -7   -2.21    3.19
  -2  -1  -7    5.86    6.95
  -2   1  -7   -0.28    3.08
  -2  -1  -7    2.70    2.71
  -2  -1  -7   -0.31    2.82
  -2  -1  -8  335.80   14.49
  -2   1  -8  324.93   15.00
  -2   1  -8  358.80   14.71
  -2  -1  -9   -0.57    4.32
  -2   1  -9   -4.24    5.34
  -2   1  -9   -0.13    4.61
  -2  -1  -9    0.25    5.05
  -2   1 -10   14.37    4.58
  -2   1 -10    7.35    5.90
  -2  -1 -10   15.69    5.60
  -2   1 -10   14.71    5.05
  -2  -1 -10   12.76    4.88
  -2   1 -11   -0.55    5.83
  -2  -1 -11   -3.35    4.52
  -2  -1 -11   -3.14    5.18
  -2   1 -11   -2.38    3.72
  -2   1 -11   -1.81    4.33
  -2   1 -12    2.05    2.99
  -2   1 -12    4.60    4.41
  -2  -1 -12   -1.19    4.16
  -2  -1 -12    1.68    5.57
  -2   1 -12    0.36    5.68
  -2  -1 -13   38.25    4.65
  -2  -1 -13   39.85    5.75
  -2   1 -13   40.95    4.73
  -2   1 -13   41.26    5.89
  -2   1 -14   11.88    5.01
  -2  -1 -14    4.29    4.73
  -2  -1 -14    4.31    3.69
  -2  -1 -15   17.30    2.80
  -2  -1 -15   21.14    3.92
   2  -2 -17    4.05    3.07
   2  -2 -16   16.27    3.77
   2  -2 -16   16.79    3.09
   2   2 -15    2.88    4.30
   2  -2 -15   -0.89    4.23
   2  -2 -15   -4.18    3.74
   2  -2 -14   16.97    4.13
   2   2 -14   17.34    4.80
   2   2 -13   34.26    5.64
   2  -2 -13    2.63    4.39
   2   2 -12   20.58    5.73
   2  -2 -12   15.31    4.88
   2  -2 -11  100.49    6.92
   2   2 -11  114.30    7.65
   2  -2 -10  323.45   14.04
   2   2 -10  341.40   14.57
   2  -2 -10  310.81   13.56
   2  -2  -9  196.36    9.37
   2   2  -9  183.87    9.83
   2  -2  -8  119.18    6.14
   2  -2  -8  125.26    5.82
  -2  -2   7   30.01    5.71
  -2  -2   6  211.37   11.22
  -2  -2   5  138.03    8.31
   2   2  -4  295.88   13.82
   2   2  -3 4009.34  156.64
   2   2  -2  493.56   21.45
  -2   2   1  307.86   13.22
  -2   2   0   81.20    6.29
   2   2   1  599.01   24.65
  -2  -2  -1  606.61   23.74
  -2  -2  -1  569.36   21.66
  -2   2  -1  412.61   18.07
  -2   2  -1  345.58   19.04
  -2  -2  -2  651.28   23.06
  -2  -2  -2  738.52   25.95
   2   2   3  606.50   29.84
   2   2   4  609.96   29.79
   2   2   5 3095.88  111.17
  -2  -2  -5 2766.76  104.91
  -2  -2  -6   16.60    2.71
   2   2   6   25.61    8.92
  -2   2  -6    9.64    6.93
  -2  -2  -6   19.31    2.67
  -2   2  -6   14.10    3.19
  -2   2  -6   12.78    3.19
  -2  -2  -6   20.20    3.41
  -2  -2  -6   11.22    5.38
  -2   2  -6   12.84    3.84
  -2   2  -7  710.83   27.60
  -2   2  -7  639.73   27.70
  -2  -2  -7  785.10   27.28
  -2  -2  -7  749.64   27.67
  -2  -2  -7  671.26   27.34
   2   2   7  568.78   33.78
  -2   2  -7  644.98   27.41
  -2   2  -8    5.97    4.36
  -2  -2  -8    7.59    3.44
  -2   2  -8    5.63    3.93
  -2   2  -8    9.32    4.21
  -2   2  -8    8.32    5.09
  -2  -2  -8    8.23    3.83
  -2  -2  -9  235.72   10.36
  -2   2  -9  219.72   11.20
  -2   2  -9  212.67   10.60
  -2   2  -9  226.27   10.44
  -2  -2  -9  200.09    9.88
  -2   2 -10    5.81    4.69
  -2  -2 -10    5.62    4.56
  -2   2 -10    3.41    6.54
  -2   2 -10    6.42    5.04
  -2   2 -11   24.69    4.74
  -2  -2 -11   28.88    4.60
  -2   2 -11   19.25    4.30
  -2   2 -11   32.15    6.20
  -2   2 -12    3.54    3.45
  -2   2 -12    5.75    5.50
  -2  -2 -12    9.69    4.20
  -2  -2 -13  122.11    6.89
  -2   2 -13  130.10    8.23
  -2   2 -14   10.74    4.41
  -2  -2 -14   15.86    3.64
  -2  -2 -14   15.58    4.55
  -2  -2 -15   17.48    3.68
  -2  -2 -15   16.90    2.88
   2  -3 -16    0.13    2.94
   2  -3 -15    3.04    3.42
   2  -3 -14   -1.04    3.86
   2   3 -13   -3.54    4.96
   2  -3 -13   11.49    4.35
   2  -3 -12    3.23    3.49
   2   3 -12    5.80    5.24
   2  -3 -12   18.14    5.16
   2  -3 -12    7.68    4.70
   2   3 -11   34.63    6.14
   2  -3 -11   45.12    5.25
   2  -3 -11   51.01    5.56
   2  -3 -11   43.76    4.45
   2  -3 -10  315.89   13.92
   2  -3 -10  328.91   13.59
   2   3 -10  338.44   14.49
   2  -3 -10  289.78   13.98
   2  -3  -9    7.35    3.22
   2  -3  -9    5.17    3.68
   2  -3  -8  164.46    7.51
   2  -3  -8  169.59    7.47
  -2  -3   8  157.32   11.21
   2  -3  -7   67.81    3.89
   2  -3  -7   70.65    3.90
  -2  -3   6  584.77   22.70
   2  -3  -6  466.08   19.06
   2   3  -5  201.52   10.54
   2   3  -4  569.08   24.64
   2   3  -3 1004.13   41.45
   2   3  -2  590.33   25.47
  -2  -3   1   88.17    8.17
  -2  -3   0  241.44   15.57
  -2  -3  -1  595.32   28.37
  -2  -3  -1  595.31   26.81
  -2  -3  -2  178.47   13.22
  -2   3  -2  220.86   11.27
  -2  -3  -2  190.71   15.00
  -2  -3  -3    5.35    6.67
  -2   3  -4 1630.37   65.97
  -2  -3  -4 1740.15   65.81
   2   3   5  111.68   12.95
  -2   3  -5   83.38    5.05
  -2   3  -5   83.39    5.06
  -2  -3  -5   93.49    5.12
  -2  -3  -5  100.14    5.08
  -2  -3  -5   96.28    4.66
  -2  -3  -5   95.66    4.86
   2   3   5   90.35    4.69
  -2  -3  -6 1057.50   39.44
  -2   3  -6  971.08   39.44
   2   3   6 1100.24   47.94
  -2  -3  -6  978.48   39.34
   2   3   6  992.73   39.16
  -2  -3  -6 1044.25   39.28
  -2   3  -6  869.43   39.53
  -2   3  -6  951.22   39.38
  -2  -3  -6 1065.66   39.17
  -2  -3  -7   -0.46    3.79
   2   3   7    3.19    3.20
  -2   3  -7    3.03    5.02
  -2  -3  -7    2.79    2.99
  -2  -3  -7    2.61    2.90
  -2   3  -7    2.50    3.73
  -2   3  -8  519.22   20.14
  -2  -3  -8  560.31   19.46
  -2   3  -8  487.69   20.50
  -2  -3  -8  532.67   19.97
   2   3   8  559.79   19.63
  -2  -3  -9    4.39    3.72
  -2   3  -9    2.73    4.91
  -2   3  -9    4.84    6.30
  -2  -3  -9    1.05    5.01
  -2  -3 -10  235.07   10.97
  -2   3 -10  240.95   12.43
  -2  -3 -10  258.20   11.80
  -2   3 -10  240.45   11.79
  -2   3 -11   23.18    4.68
  -2  -3 -11   28.22    5.31
  -2   3 -11   26.39    6.16
  -2  -3 -11   29.64    4.53
  -2  -3 -12  116.30    7.53
  -2  -3 -12  109.17    6.55
  -2  -3 -13   -2.19    3.60
  -2  -3 -14   46.00    4.14
  -2  -3 -15    1.39    2.41
   2  -4 -16    4.88    2.94
   2  -4 -16   -0.44    2.56
   2  -4 -15    3.83    3.64
   2  -4 -15    3.93    3.21
   2  -4 -14   -1.12    3.70
   2  -4 -14   -0.55    4.15
   2  -4 -13   -1.45    4.45
   2  -4 -13    0.45    2.93
   2  -4 -13    2.87    4.12
   2  -4 -12   84.75    6.04
   2  -4 -12   71.08    4.95
   2  -4 -11   12.36    4.82
   2  -4 -11   16.67    4.04
   2  -4 -10   24.67    4.07
   2  -4 -10   23.13    4.65
   2  -4  -9  318.94   14.06
   2  -4  -9  332.96   13.80
   2  -4  -8  314.08   13.87
   2  -4  -8  329.34   13.84
   2  -4  -8  336.68   13.68
   2  -4  -8  334.15   13.70
   2  -4  -7  631.23   25.81
   2  -4  -7  648.47   25.94
   2  -4  -7  657.10   25.85
  -2  -4   6   96.33    9.25
   2  -4  -6   60.47    3.58
  -2  -4   6   90.00    8.83
   2  -4  -6   63.05    3.70
   2   4  -5  183.99    9.12
  -2  -4   5  234.74   12.90
   2   4  -4   39.63    5.92
  -2  -4   4   55.32    8.13
   2   4  -3 3078.33  123.48
  -2  -4   3 3168.30  124.84
  -2  -4   2  395.09   25.67
   2  -4  -2  637.56   23.52
  -2  -4   1 1748.14   63.88
   2  -4  -1 1456.24   60.67
  -2  -4   0 2955.93  126.32
   2  -4   0 3224.35  123.45
  -2  -4  -1 2322.85   80.98
   2  -4   1 1803.33   76.67
  -2   4  -2  357.98   19.20
  -2  -4  -2  640.50   25.31
   2   4   3 2598.69   76.22
  -2  -4  -3 2724.89   84.34
  -2  -4  -3 2528.21   76.16
   2   4   4   -0.77    2.45
  -2  -4  -4   -2.64    2.55
  -2  -4  -4   -4.87    3.42
  -2   4  -5  256.85   11.46
  -2  -4  -5  247.35   11.13
  -2  -4  -5  281.08   11.54
  -2  -4  -5  260.14   11.03
   2   4   5  257.61   11.13
   2   4   6   10.56    3.13
  -2   4  -6   11.51    3.89
  -2  -4  -6   14.66    3.79
  -2  -4  -6    8.62    2.95
  -2  -4  -6    7.16    3.16
  -2  -4  -6   11.93    3.49
  -2  -4  -7  653.53   26.62
  -2   4  -7  682.48   26.91
  -2  -4  -7  586.52   26.42
   2   4   7  696.37   26.44
  -2  -4  -7  692.72   26.32
  -2  -4  -7  641.84   26.39
  -2   4  -8   -0.47    4.98
  -2  -4  -8   -3.10    3.50
  -2  -4  -8   -0.89    4.60
  -2  -4  -8   -2.99    3.02
  -2  -4  -8   -5.01    3.93
   2   4   8   -0.47    3.82
  -2  -4  -9  389.89   16.59
  -2   4  -9  370.75   17.27
  -2  -4  -9  376.89   16.91
  -2  -4  -9  380.19   16.35
   2   4   9  424.92   16.58
  -2  -4 -10   30.05    5.13
  -2   4 -10   33.01    5.26
  -2  -4 -10   31.37    3.98
  -2  -4 -11  177.59    9.53
  -2  -4 -12  165.40    9.14
  -2  -4 -13   78.66    5.84
  -2  -4 -14    2.09    3.58
  -2  -4 -14    5.24    2.96
  -2  -4 -15   20.23    2.91
  -2  -4 -15   23.86    2.53
   2  -5 -16    2.19    2.68
   2  -5 -16   -0.53    2.23
   2  -5 -15    6.26    3.20
   2  -5 -14    9.57    2.55
   2  -5 -14   14.82    3.73
   2  -5 -13   52.91    4.97
   2  -5 -13   41.31    3.84
   2  -5 -12   55.11    5.17
   2  -5 -12   48.49    4.26
   2  -5 -11   73.23    5.70
   2  -5 -11   82.27    5.72
   2  -5 -11   70.45    5.19
   2  -5 -10   44.60    5.11
   2  -5 -10   55.91    5.09
   2  -5 -10   43.68    5.16
   2  -5  -9  576.54   22.71
   2  -5  -9  558.28   22.82
   2  -5  -9  541.88   22.86
   2  -5  -8  262.92   11.01
   2   5  -8  238.14   11.43
   2  -5  -8  254.14   11.19
   2  -5  -8  246.67   11.25
   2  -5  -8  269.55   11.13
   2  -5  -7  303.82   13.17
   2  -5  -7  315.34   13.02
   2  -5  -7  290.81   13.15
   2  -5  -7  310.40   12.96
   2   5  -7  343.97   13.51
   2  -5  -6    2.48    2.41
   2  -5  -6    0.09    2.45
   2   5  -6    0.89    3.14
  -2  -5   5  105.08   10.52
   2   5  -5   94.27    7.92
  -2  -5   5  108.73    9.73
   2   5  -5   87.36    5.12
   2  -5  -5   85.77    4.56
   2   5  -4  779.90   23.83
  -2  -5   4  807.17   29.37
   2   5  -4  851.65   28.45
   2   5  -3   52.42    3.73
   2  -5  -3   41.44    2.88
   2  -5  -3   48.01    4.61
  -2  -5   3   45.85    7.48
   2   5  -3   55.34    6.59
   2  -5  -2  381.98   17.19
  -2  -5   2  384.36   20.11
  -2  -5   1 1109.67   47.40
   2  -5  -1 1080.17   44.40
  -2   5   0   21.73    6.92
  -2  -5   0   25.56    8.88
   2  -5   0   28.16    5.53
   2  -5   1  579.10   25.02
  -2   5  -1  528.16   26.20
  -2  -5  -1  619.63   28.90
   2   5   1  559.52   22.32
  -2  -5  -2   40.29    5.03
  -2  -5  -2   16.91   10.33
  -2   5  -2    6.60    7.20
   2  -5   2   33.46    7.52
   2   5   2   45.98    4.11
  -2  -5  -3   45.31    3.78
  -2  -5  -3   43.79   10.17
  -2  -5  -3   40.49    3.11
  -2  -5  -4  121.99    6.49
  -2  -5  -4  120.65    5.78
   2   5   4  113.74    5.82
  -2  -5  -5  123.92    6.45
  -2  -5  -5  113.92    5.88
   2   5   5  109.75    5.92
  -2   5  -5  109.09    6.56
  -2  -5  -5  126.62    6.49
   2   5   6   27.56    3.69
  -2  -5  -6   27.30    3.54
  -2   5  -6   31.81    4.86
  -2  -5  -6   27.94    4.50
  -2  -5  -6   26.43    3.70
  -2  -5  -6   27.46    4.17
  -2   5  -7   24.50    5.22
  -2  -5  -7   18.97    4.07
   2   5   7   26.92    3.86
  -2  -5  -7   18.16    4.59
  -2  -5  -7   25.17    3.65
  -2  -5  -7   22.96    3.96
  -2   5  -8   15.83    5.46
  -2  -5  -8   12.90    3.73
   2   5   8   17.44    4.12
  -2  -5  -8   16.07    4.90
  -2  -5  -8   17.94    4.23
  -2  -5  -8   10.11    3.32
   2   5   9   46.70    4.76
  -2  -5  -9   39.48    4.38
  -2  -5  -9   45.26    4.85
  -2  -5  -9   45.03    5.36
   2   5  10   59.73    4.78
  -2  -5 -10   47.08    5.41
  -2  -5 -10   49.77    4.80
  -2  -5 -10   43.41    4.30
  -2  -5 -11   95.68    6.65
  -2  -5 -11   80.31    5.89
  -2   5 -12   47.86    4.94
  -2  -5 -12   59.69    5.23
  -2  -5 -12   60.05    4.66
  -2  -5 -13   48.83    4.71
  -2  -5 -14   28.25    3.45
   2  -6 -15   32.96    3.45
   2  -6 -14  123.43    6.13
   2  -6 -14  134.67    5.95
   2  -6 -13   11.70    3.12
   2  -6 -13   14.15    3.60
   2  -6 -13   11.20    3.69
   2  -6 -12  134.78    6.95
   2  -6 -12  112.78    6.36
   2  -6 -12  117.67    6.91
  -2   6  12  130.47    6.67
   2  -6 -11   55.38    4.87
   2  -6 -11   53.09    4.54
   2  -6 -11   55.25    4.87
  -2   6  11   53.20    4.66
   2  -6 -10   21.65    3.97
   2  -6 -10   19.71    4.17
   2  -6 -10   23.54    4.24
   2   6  -9    8.40    4.88
   2  -6  -9    7.76    3.97
   2  -6  -9   -1.16    4.25
   2  -6  -9    6.63    3.93
   2  -6  -8  627.04   25.90
   2   6  -8  634.87   26.38
   2  -6  -8  598.35   25.92
   2  -6  -7    0.66    3.27
   2  -6  -7    3.63    3.46
   2   6  -7   -0.21    4.33
   2  -6  -7    6.38    3.20
   2  -6  -6  713.15   27.44
   2  -6  -6  727.10   27.42
   2  -6  -5  396.10   16.32
   2   6  -5  440.44   16.98
   2  -6  -5  387.04   16.32
   2  -6  -4  560.81   21.40
   2   6  -4  463.97   21.71
   2  -6  -4  569.22   21.27
   2   6  -4  430.08   25.33
  -2   6   3   38.23    3.92
   2   6  -3   39.33    6.95
   2  -6  -3   30.69    2.88
  -2   6   3   33.19    8.38
   2   6  -3   30.25    3.61
   2   6  -2   10.62    3.26
  -2   6   2   26.03    3.60
  -2   6   2   14.09    7.45
   2  -6  -2   46.10    5.86
   2  -6  -2   37.91    2.72
  -2   6   1  589.03   30.08
   2   6  -1  659.81   24.96
   2  -6  -1  630.20   27.49
  -2   6   1  636.60   24.90
   2   6  -1  583.66   24.56
  -2   6   0   15.26    3.11
  -2   6   0    7.95    7.98
   2  -6   0   13.98    5.83
  -2  -6   0   21.20    9.19
   2   6   0   21.27    2.76
  -2  -6  -1   49.40   10.63
  -2   6  -1   69.25    9.54
   2   6   1   54.34    3.67
   2  -6   1   60.58    7.34
  -2   6  -1   52.24    4.19
  -2  -6  -2   27.97    9.92
   2  -6   2   32.79    7.17
  -2   6  -2   28.97    3.82
  -2  -6  -2   35.70    3.84
   2   6   2   34.05    3.26
  -2  -6  -2   44.59    3.16
  -2  -6  -3   11.27    2.75
  -2  -6  -3   11.27   10.13
  -2  -6  -3   16.09    3.55
  -2  -6  -4   73.47    4.49
  -2  -6  -4   68.64    5.09
  -2  -6  -4   63.75    4.32
  -2  -6  -5   22.68    3.72
   2   6   5   21.98    3.73
  -2  -6  -5   22.83    4.26
  -2  -6  -6    1.28    4.67
   2   6   6   -2.25    3.64
  -2  -6  -6   -2.68    3.58
   2   6   7    5.63    3.92
  -2  -6  -7    5.63    3.77
  -2  -6  -7    5.39    4.73
  -2  -6  -7    5.17    3.98
  -2  -6  -8   -2.58    5.00
  -2  -6  -8   -0.28    3.96
   2   6   8   -4.13    4.09
  -2  -6  -8   -6.38    3.68
  -2  -6  -8   -3.22    3.76
  -2  -6  -9    0.82    4.55
  -2  -6  -9   -0.08    3.69
   2   6   9    2.18    3.58
  -2  -6  -9   -2.52    3.42
  -2   6 -10   -4.42    5.13
   2   6  10    3.71    3.76
  -2  -6 -10   -1.13    3.74
  -2  -6 -10   -3.45    3.44
  -2  -6 -10    3.67    4.57
  -2  -6 -11   31.76    4.16
  -2  -6 -11   40.16    4.75
  -2  -6 -12   31.70    3.58
  -2  -6 -12   34.49    4.38
  -2   6 -12   26.81    4.06
  -2  -6 -13    1.27    3.16
  -2  -6 -13    4.88    2.72
  -2  -6 -14   23.44    2.46
   2  -7 -15   57.31    3.41
   2  -7 -14    1.21    2.25
   2  -7 -14    0.40    2.80
   2  -7 -14    2.90    2.59
   2  -7 -13  112.14    5.58
   2  -7 -13   95.10    5.51
   2  -7 -13   99.15    5.31
   2  -7 -12    1.46    3.01
   2  -7 -12   -0.45    3.32
  -2   7  12    1.31    3.46
   2  -7 -12   -0.20    3.37
   2  -7 -11   70.21    4.93
   2  -7 -11   59.69    5.03
   2  -7 -11   73.38    5.13
  -2   7  11   79.37    5.24
   2  -7 -10   13.69    3.78
   2  -7 -10    8.46    3.70
   2  -7 -10    8.69    3.63
   2   7 -10    8.73    4.04
   2  -7  -9    2.18    3.67
   2  -7  -9    1.92    3.65
   2   7  -9    6.46    4.46
   2   7  -8  122.19    7.65
   2  -7  -8  116.49    6.61
   2  -7  -7  546.75   23.25
   2   7  -7  603.52   24.04
   2  -7  -7  587.74   23.36
   2   7  -6   12.17    4.66
   2  -7  -6   10.49    3.53
   2  -7  -6   11.03    3.25
   2  -7  -5  478.41   20.12
   2  -7  -5  497.22   20.22
   2   7  -5  545.37   20.92
   2  -7  -5  497.60   20.15
  -2   7   4  354.50   14.93
   2  -7  -4  345.31   13.96
   2  -7  -4  335.99   14.10
   2   7  -4  321.23   14.66
   2  -7  -3  111.52    5.64
   2  -7  -3  115.34    5.96
   2   7  -3  125.84    6.81
   2  -7  -2  339.56   14.07
   2   7  -2  343.06   14.62
   2  -7  -2  325.14   13.89
   2   7  -1  140.29    7.16
   2   7  -1  138.12    7.78
   2   7   0  354.96   14.87
  -2   7   0  364.04   15.33
   2   7   1    9.81    3.21
  -2  -7  -1    7.16    3.00
  -2   7  -1    5.06    3.81
  -2   7  -2   -0.80    4.05
   2   7   2    5.39    3.24
  -2  -7  -2    2.21    3.09
  -2  -7  -2    3.30    3.79
   2   7   3    2.73    3.31
  -2   7  -3    1.66    4.38
  -2  -7  -3    3.35    3.92
  -2  -7  -3    1.85    3.11
  -2  -7  -4   77.32    5.58
  -2  -7  -4   70.30    4.78
  -2  -7  -5   -1.30    3.60
  -2  -7  -5    1.17    4.16
  -2  -7  -5   -0.78    3.46
  -2   7  -6   51.46    6.65
  -2  -7  -6   63.51    5.53
  -2  -7  -6   57.75    4.87
   2   7   6   58.93    4.99
  -2   7  -7   58.09    6.98
  -2  -7  -7   66.91    5.16
   2   7   7   76.23    5.24
  -2  -7  -7   65.80    5.06
  -2   7  -8    6.14    5.27
   2   7   8    4.80    3.69
  -2  -7  -8    2.33    4.13
  -2  -7  -8    2.48    3.44
  -2  -7  -8    1.76    3.14
   2   7   9   -2.59    3.63
  -2  -7  -9   -5.12    4.36
  -2  -7  -9   -6.89    3.67
  -2  -7  -9   -2.06    3.53
  -2   7  -9   -2.11    5.15
   2   7  10   29.39    4.08
  -2  -7 -10   21.78    3.69
  -2   7 -10   20.54    5.16
  -2  -7 -10   25.80    4.59
  -2  -7 -10   24.10    3.70
  -2   7 -11    5.39    4.35
  -2  -7 -11    2.38    3.62
  -2  -7 -11    8.44    3.18
  -2  -7 -12    5.37    2.99
  -2  -7 -12    6.62    2.75
  -2   7 -12    5.52    3.30
  -2  -7 -13   14.11    2.37
   2  -8 -14   60.84    3.28
   2  -8 -14   50.38    3.12
   2  -8 -13   -2.86    2.54
   2  -8 -13   -0.45    2.40
   2  -8 -12   94.04    5.45
   2  -8 -12  100.42    5.38
   2  -8 -11   32.57    3.77
  -2   8  11   41.88    4.20
   2  -8 -11   30.28    3.70
   2   8 -10   25.10    4.21
   2  -8 -10   26.61    3.71
  -2   8  10   30.66    4.14
   2  -8  -9   10.75    3.42
   2   8  -9   10.61    4.33
   2  -8  -8   47.59    4.48
   2   8  -8   39.76    5.15
   2  -8  -8   40.39    4.12
   2   8  -7    1.08    4.82
   2  -8  -7    1.64    3.84
   2  -8  -7   -1.79    3.48
   2  -8  -6  134.20    5.45
   2  -8  -6   75.33    5.49
   2   8  -5  152.05    8.34
   2  -8  -5  148.16    7.29
   2  -8  -5  153.60    8.23
   2  -8  -5  138.06    7.44
   2   8  -4   46.82    5.99
  -2   8   4   62.97    6.60
   2  -8  -3  253.52   11.39
   2   8  -3  276.38   12.33
   2  -8  -3  262.40   11.64
  -2   8   2   10.56    4.70
   2   8  -2    2.93    4.38
  -2   8   1  452.62   16.26
   2   8  -1  394.77   15.53
   2  -8   0   91.08    5.11
  -2   8   0  104.78    6.80
   2   8   0  109.48    5.85
  -2   8  -1   83.03    6.43
   2   8   1   92.74    5.52
  -2  -8  -1   89.84    6.13
  -2  -8  -1   79.22    5.29
   2   8   2    2.61    3.77
  -2   8  -2   -1.19    4.81
  -2  -8  -2    3.17    3.64
  -2  -8  -2    3.29    4.33
  -2  -8  -3  249.63   10.96
  -2   8  -3  231.96   11.51
  -2  -8  -3  219.40   10.35
   2   8   3  234.00   10.51
  -2  -8  -4    9.45    3.74
  -2  -8  -4   -0.79    4.45
   2   8   4    3.29    4.00
  -2  -8  -5  104.83    6.56
  -2  -8  -5   95.48    5.88
  -2   8  -6   21.83    5.79
  -2  -8  -6   19.64    4.34
  -2  -8  -6   25.71    3.80
  -2  -8  -7   87.32    5.42
  -2  -8  -7   84.84    5.57
  -2   8  -7   99.66    7.32
  -2  -8  -7   88.13    5.61
   2   8   7  107.41    5.87
  -2  -8  -8   18.00    3.43
  -2  -8  -8   20.83    3.57
  -2   8  -8   27.77    5.64
   2   8   8   30.46    4.02
  -2  -8  -9   59.35    4.71
  -2   8  -9   75.17    6.54
  -2   8 -10   43.78    5.50
   2   8  10   51.61    4.15
  -2  -8 -10   35.23    3.67
  -2  -8 -11   25.67    2.99
  -2   8 -11   35.13    4.52
  -2  -8 -12    7.57    2.01
  -2   8 -12    2.75    2.44
   2  -9 -13    3.36    1.96
   2  -9 -12   -0.09    2.33
   2  -9 -12    0.34    2.14
  -2   9  12    0.38    2.50
   2  -9 -11    0.97    2.47
  -2   9  11   -1.17    3.04
  -2   9  10    7.19    3.53
   2   9 -10    4.41    3.75
   2  -9 -10    5.81    2.85
   2  -9  -9    1.15    3.44
   2   9  -9   -0.47    4.02
   2  -9  -9   -1.92    2.96
   2  -9  -8  103.25    5.95
   2   9  -8   87.72    6.44
   2  -9  -7   22.46    4.00
   2   9  -7   24.74    4.76
   2  -9  -6   19.74    3.85
   2   9  -6   16.70    4.54
   2  -9  -6   16.66    4.13
   2  -9  -5   28.61    3.88
   2  -9  -5   31.32    4.15
   2   9  -5   36.33    5.14
   2  -9  -5   34.47    4.96
   2  -9  -4  141.93    7.42
   2  -9  -4  154.80    7.74
   2   9  -4  160.91    8.58
   2  -9  -3   72.94    5.18
   2   9  -3   84.92    6.60
  -2   9   3   88.75    6.87
   2  -9  -3   82.73    5.49
   2  -9  -2  199.53    8.75
  -2   9   2  191.08    9.92
   2   9  -2  166.60    9.84
  -2  -9   1  140.37    8.71
   2  -9  -1  178.22    7.60
   2   9   0  300.81   12.81
  -2   9   0  283.77   13.69
   2  -9   0  290.38   12.48
   2   9   1  120.36    6.60
  -2   9  -1  108.93    7.98
  -2  -9  -1  105.22    6.58
  -2  -9  -1  112.50    7.29
   2   9   2  770.55   30.58
  -2   9  -2  802.34   31.54
  -2  -9  -2  711.35   30.54
  -2  -9  -2  794.78   30.96
  -2   9  -3   54.18    6.75
  -2  -9  -3   58.89    4.93
   2   9   3   68.03    5.02
  -2  -9  -3   66.52    5.47
  -2  -9  -4  421.99   17.06
   2   9   4  406.46   16.75
  -2  -9  -4  375.43   16.64
  -2  -9  -5   -2.78    3.74
  -2  -9  -5    1.07    3.41
  -2   9  -6  156.18    9.17
  -2  -9  -6  145.13    7.42
  -2  -9  -6  142.05    7.61
  -2  -9  -7    1.48    3.37
  -2   9  -7   -5.10    5.61
   2   9   7    6.68    3.78
  -2  -9  -7    2.05    3.28
  -2  -9  -8  194.81    9.72
  -2   9  -8  256.91   11.67
   2   9   8  269.76   10.26
  -2  -9  -8  220.66   10.10
   2   9   9    4.38    3.26
  -2   9  -9    2.62    4.81
  -2   9 -10  113.05    6.93
   2   9  10  115.82    5.71
  -2   9 -11   -0.03    2.96
  -2  10  12    4.04    1.89
  -2  10  11    3.21    2.45
   2 -10 -10    4.45    2.58
  -2  10  10    9.80    2.91
  -2  10   9    6.39    3.35
   2 -10  -9    4.67    2.87
   2  10  -9    3.25    3.79
   2  10  -8   17.80    4.33
   2 -10  -8   18.12    3.42
  -2 -10   8   15.71    5.13
   2  10  -7    3.14    4.23
   2 -10  -7    5.32    3.43
  -2 -10   7    1.13    4.99
   2 -10  -6   10.46    3.55
  -2 -10   6   12.45    5.17
   2  10  -6    8.57    4.45
  -2 -10   5   13.16    5.04
   2  10  -5   16.51    4.65
   2 -10  -5   11.85    4.19
   2  10  -4   62.03    5.71
   2 -10  -4   72.41    5.59
  -2 -10   4   58.93    6.17
   2 -10  -4   56.87    4.73
   2  10  -3   14.59    4.80
  -2 -10   3   10.48    5.12
   2 -10  -3   11.16    3.27
   2 -10  -3   13.71    3.58
  -2  10   2   96.64    6.56
   2 -10  -2   77.96    5.00
  -2 -10   2   89.14    6.61
   2 -10  -1   85.16    5.17
  -2  10   1  107.65    6.71
  -2  10   0   31.23    5.22
   2  10   0   34.13    4.19
  -2  10  -1  267.39   13.21
   2  10   1  290.15   12.41
  -2 -10  -1  283.90   12.88
  -2  10  -2   -5.02    5.32
   2  10   2    3.22    3.68
  -2 -10  -2    1.14    4.25
  -2 -10  -3  496.64   22.30
  -2 -10  -3  563.34   22.61
   2  10   3  588.07   22.46
  -2  10  -3  563.59   23.45
  -2 -10  -4    8.68    3.49
  -2 -10  -4   13.65    3.97
   2  10   4   16.67    3.80
  -2 -10  -5   99.85    6.03
  -2 -10  -5   92.26    5.78
  -2 -10  -6   -0.86    3.34
  -2 -10  -6    2.79    3.27
  -2 -10  -7   47.84    3.79
  -2  10  -7   55.25    5.96
  -2  10  -8    9.84    4.95
   2  10   8    6.72    2.95
  -2  10  -9   84.31    5.95
   2  10   9   91.37    4.78
  -2  10 -10    1.82    3.07
  -2  11  11    6.76    1.76
   2 -11 -11    2.11    1.65
   2 -11 -10   24.80    2.59
  -2  11  10   34.72    2.89
   2 -11  -9    6.81    2.39
   2 -11  -8   40.88    3.36
   2  11  -7   48.44    4.95
  -2 -11   7   51.00    5.70
   2 -11  -7   41.30    3.73
  -2  11   7   54.41    4.20
   2  11  -6   56.30    5.32
   2 -11  -6   52.08    4.15
  -2  11   6   68.83    4.70
  -2 -11   6   69.19    5.97
   2  11  -5   26.69    4.71
   2 -11  -5   18.38    3.41
  -2  11   5   25.93    3.90
   2 -11  -5   22.67    4.17
  -2 -11   5   31.96    5.22
   2 -11  -4   78.21    5.65
  -2 -11   4   91.38    6.37
   2  11  -4   80.76    6.16
   2 -11  -4   66.26    4.78
   2 -11  -3   92.22    6.64
  -2 -11   3  109.02    7.09
  -2 -11   2   32.34    5.17
  -2  11   1   27.25    4.94
  -2  11   1   24.82    3.98
   2  11   0   85.66    5.22
  -2  11   0   56.37    5.74
  -2  11  -1    4.29    4.55
   2  11   1    6.26    3.47
  -2 -11  -1    4.33    4.18
  -2 -11  -2  254.82   11.49
  -2  11  -2  231.59   11.96
   2  11   2  265.38   11.18
  -2  11  -3   -7.17    5.02
   2  11   3   -1.08    3.39
  -2 -11  -3    2.15    3.73
  -2  11  -4  175.78    9.68
  -2 -11  -4  175.37    8.69
   2  11   4  198.01    8.60
  -2 -11  -5    1.15    3.17
   2  11   5    2.13    3.02
   2  11   6   48.59    3.79
  -2 -11  -6   40.89    3.50
  -2  11  -7   18.53    4.22
  -2  11  -8   65.03    4.81
  -2  11  -9   13.98    2.85
   2 -12  -8   10.82    1.99
  -2  12   8   19.45    2.43
  -2  12   7    2.27    2.45
   2 -12  -7    1.84    2.10
  -2 -12   7    3.32    3.18
   2 -12  -6   16.28    2.57
  -2 -12   6   19.70    4.24
  -2  12   5    8.82    2.99
  -2  12   4   54.49    4.07
  -2 -12   4   49.02    4.99
   2 -12  -4   41.96    4.24
  -2  12   3    7.36    3.20
  -2 -12   3   11.88    4.25
   2 -12  -3   11.53    3.95
  -2 -12   2   74.83    5.44
   2 -12  -2   75.01    5.48
  -2  12   2   61.94    4.44
   2 -12  -1    6.49    4.54
  -2  12   0   60.83    5.30
  -2  12  -1   25.94    4.45
   2  12   1   26.42    3.37
  -2 -12  -1   25.79    3.88
  -2  12  -2    3.77    4.03
   2  12   2    2.69    3.25
  -2 -12  -2    4.25    3.31
  -2 -12  -3   18.15    3.33
  -2  12  -3   10.52    4.09
   2  12   3   19.66    3.29
  -2  12  -4    7.81    3.87
   2  12   4   16.30    3.05
  -2 -12  -4   15.29    3.00
  -2 -12  -5    2.24    2.24
   2  12   5    5.35    2.61
   2  12   6   13.44    2.34
  -2 -12  -6    5.57    1.76
  -2  12  -7    2.72    2.81
   2 -12   7    8.14    4.30
  -2  13   7   13.29    1.78
  -2  13   6    1.45    1.92
  -2  13   5   12.78    2.25
  -2 -13   5   12.77    3.00
  -2  13   4    1.96    2.24
  -2 -13   4    0.49    3.02
  -2 -13   3   29.17    3.50
   2 -13  -3   22.17    2.92
   2 -13  -2    5.27    3.19
  -2 -13   2    2.14    3.04
   2 -13  -1   14.61    3.53
   2 -13   0   25.02    3.91
  -2 -13  -1    5.02    2.68
   2 -13   1   -2.49    3.68
  -2 -13  -2   13.60    2.66
  -2 -13  -3    1.78    2.11
  -2 -13  -4    8.92    1.86
   2 -13   4    5.16    3.64
   2 -13   5    0.33    3.18
  -2 -14   2    3.21    1.88
   3   0 -17    4.94    2.82
   3   0 -16   31.67    4.31
   3   0 -15    4.12    4.64
   3   0 -15    2.19    3.37
   3   0 -14  140.07    8.29
   3   0 -14  125.48    7.41
   3   0 -13   17.68    5.49
   3   0 -13   16.90    4.81
   3   0 -12   18.54    5.85
   3   0 -12   24.78    5.45
   3   0 -11   12.05    4.96
   3   0 -11   13.58    5.61
   3   0 -10  117.29    7.18
   3   0  -9    1.06    3.81
  -3   0   8  403.73   22.25
   3   0  -8  444.18   18.07
   3   0  -7   -0.70    2.28
  -3   0   7    0.93    5.03
  -3   0   6  412.07   17.40
  -3   0   6  410.44   19.35
  -3   0   5   -1.05    5.39
  -3   0   5    1.10    4.12
  -3   0   4  550.45   24.20
  -3   0   4  579.15   25.05
  -3   0   3    0.45    6.89
  -3   0   2  454.12   22.25
   3   0  -1    5.43    8.96
  -3   0   1   -2.44    8.01
  -3   0   1   -0.87    3.98
   3   0  -1   -0.21    4.90
   3   0   0 3391.76  130.06
   3   0   0 3194.90  127.42
   3   0   1   -0.84    7.37
   3   0   1   -1.98    3.74
   3   0   2  847.55   34.79
  -3   0  -3   -0.74    4.38
   3   0   3    0.56    3.57
   3   0   3    2.76    6.67
   3   0   4 2401.14   93.57
   3   0   4 2569.85   89.65
  -3   0  -4 2107.86   91.17
  -3   0  -4 2165.77   88.52
  -3   0  -5    1.19    3.72
  -3   0  -5   -0.16    3.08
  -3   0  -5    1.28    2.50
  -3   0  -5   -0.59    6.48
   3   0   5    4.33    7.57
  -3   0  -6 1811.43   73.15
  -3   0  -6 2018.97   73.17
  -3   0  -6 1776.91   73.31
  -3   0  -7    0.59    4.94
  -3   0  -7    0.74    4.05
  -3   0  -7    0.82    3.36
  -3   0  -8  601.74   24.65
  -3   0  -8  601.11   25.07
  -3   0  -8  596.46   24.66
  -3   0  -9   -1.59    3.92
  -3   0  -9    0.83    6.38
  -3   0  -9    1.16    4.79
  -3   0 -10  147.31    8.19
  -3   0 -10  149.57    9.40
  -3   0 -11    0.43    5.62
  -3   0 -11   -0.92    3.07
  -3   0 -11   -3.60    4.62
  -3   0 -12  161.69    5.94
  -3   0 -12  154.01    7.18
  -3   0 -13   -0.71    4.15
  -3   0 -13   -1.19    5.15
  -3   0 -14   37.65    4.72
  -3   0 -14   37.52    3.60
   3   1 -17   21.56    2.91
   3  -1 -17   26.04    3.32
   3  -1 -16    5.91    3.79
   3   1 -16    0.42    3.64
   3  -1 -16    4.21    2.81
   3   1 -15   26.67    4.99
   3  -1 -15   29.61    4.92
   3  -1 -15   21.28    3.81
   3  -1 -14   33.39    4.82
   3   1 -14   29.14    5.44
   3  -1 -14   29.14    5.56
   3   1 -13  232.07   11.67
   3  -1 -13  254.33   11.98
   3   1 -13  263.56   12.53
   3  -1 -13  278.54   12.46
   3  -1 -12  211.19   11.04
   3  -1 -12  242.37   11.47
   3   1 -12  225.52   11.63
   3   1 -12  228.97   11.08
   3   1 -11  438.77   18.63
   3   1 -11  444.20   18.32
   3  -1 -11  401.12   18.16
   3  -1 -11  433.04   18.46
   3   1 -10  319.95   13.62
   3  -1 -10  291.41   13.57
   3  -1  -9 1026.66   41.38
   3   1  -9 1092.46   41.41
   3  -1  -8  112.93    5.33
   3   1  -8  109.51    5.85
  -3   1   8  105.57    9.68
  -3  -1   8  121.25   10.53
  -3  -1   7  146.29    8.65
  -3   1   7  139.41   10.19
   3   1  -7  124.13    6.20
  -3  -1   7  147.75   10.28
  -3  -1   6    5.06    4.74
  -3  -1   6    0.21    5.02
  -3   1   6    0.85    5.46
  -3   1   5  125.43    8.78
  -3  -1   5  133.63    8.61
  -3  -1   4    7.83    5.15
  -3   1   4   16.64    4.60
   3   1  -3  107.29    7.25
  -3  -1   3  110.58    7.29
  -3  -1   3   92.03   10.33
  -3  -1   2  588.14   26.40
  -3   1   2  576.06   23.34
  -3  -1   1    9.65    9.48
   3  -1  -1   -0.96    8.39
  -3   1   1    3.11    3.93
   3   1  -1   10.13    5.32
   3   1   0   11.63    9.47
  -3  -1   0   16.68    7.65
   3   1   0   19.68    5.04
  -3   1   0   15.77    3.91
   3  -1   0   20.21    6.82
  -3   1  -1  107.17    6.45
   3  -1   1  118.35    9.68
   3   1   2  278.65   16.79
   3   1   2  281.53   13.24
  -3  -1  -2  258.41   14.35
   3   1   3   10.82    7.76
   3   1   3    7.48    4.93
  -3  -1  -3    8.59    5.00
  -3   1  -3    3.60    3.53
   3   1   4  548.31   25.99
   3   1   4  594.62   22.82
  -3   1  -5  105.06    6.10
   3   1   5  121.74   12.28
  -3   1  -5  134.40   11.00
  -3   1  -5  118.59    5.93
  -3  -1  -5  135.10    5.97
  -3   1  -5   98.65    6.86
   3   1   5  135.34    8.49
  -3  -1  -5  141.89    6.19
  -3   1  -6  208.87    9.40
  -3  -1  -6  230.71    9.36
   3   1   6  154.24   15.44
  -3   1  -6  189.08   10.17
  -3   1  -6  185.89    9.50
  -3  -1  -6  234.07    9.57
  -3  -1  -7  364.39   14.54
  -3   1  -7  305.49   14.46
  -3   1  -7  328.32   14.54
  -3   1  -7  328.27   15.25
  -3  -1  -7  356.49   14.32
  -3  -1  -8   44.94    5.11
  -3   1  -8   25.22    5.07
  -3  -1  -8   34.46    4.14
  -3   1  -8   26.65    4.72
  -3   1  -8   33.34    6.45
  -3   1  -9   45.49    5.66
  -3  -1  -9   26.38    3.90
  -3  -1  -9   43.15    5.42
  -3  -1  -9   46.78    6.72
  -3   1  -9   29.17    4.76
  -3   1  -9   42.71    7.22
  -3   1 -10   46.87    5.38
  -3  -1 -10   54.88    5.42
  -3  -1 -10   56.70    6.83
  -3   1 -10   59.00    6.86
  -3   1 -11  217.81    9.46
  -3  -1 -11  207.13    9.21
  -3   1 -11  206.66   10.34
  -3  -1 -11  212.51   10.13
  -3   1 -12   -0.60    2.65
  -3  -1 -12   -1.65    1.99
  -3   1 -12   -4.37    4.55
  -3   1 -12   -7.56    5.88
  -3  -1 -12  -12.18    5.84
  -3   1 -13  113.21    7.56
  -3  -1 -13  118.39    6.60
  -3  -1 -13  113.16    7.45
  -3   1 -13  104.77    6.26
  -3  -1 -14   -4.91    4.15
   3  -2 -17    0.49    2.14
   3  -2 -17   -2.88    2.91
   3  -2 -16   14.90    3.74
   3  -2 -16   13.60    3.14
   3  -2 -15    4.40    4.59
   3   2 -15    4.87    4.21
   3  -2 -15    3.44    3.64
   3   2 -14   -1.42    4.83
   3  -2 -14    3.06    4.10
   3   2 -13    2.81    4.90
   3  -2 -13   -0.33    4.47
   3  -2 -12   40.99    5.41
   3   2 -12   50.44    6.17
   3   2 -11  467.04   18.91
   3  -2 -11  405.82   18.33
   3  -2 -11  429.03   17.82
   3  -2 -10  268.63   12.75
   3   2 -10  291.35   13.27
   3  -2 -10  295.05   12.30
   3  -2  -9  613.71   25.10
   3  -2  -9  652.84   25.44
   3  -2  -8  122.83    5.82
   3  -2  -8  127.38    5.89
  -3  -2   8  130.64    9.46
  -3   2   8  113.27   10.85
   3  -2  -8  115.14    6.04
  -3   2   7 1028.26   44.76
   3  -2  -7  992.23   40.34
   3   2  -5  533.40   23.69
   3   2  -4   12.70    4.61
   3   2  -3 2337.90   24.97
  -3  -2   3 1981.05   27.99
  -3  -2   2  425.39   24.94
   3   2  -2  449.66   22.97
  -3   2   1  858.91   34.57
  -3  -2   1  930.42   37.94
  -3   2   1  796.89   34.05
   3  -2  -1  857.08   35.60
  -3   2   0 1659.04   64.93
  -3   2   0 1590.15   64.56
   3   2   0 1664.28   65.95
  -3  -2  -1  384.48   16.46
  -3   2  -1  242.96   13.99
  -3  -2  -1  364.66   18.34
  -3   2  -1  267.04   12.86
   3   2   1  314.71   14.40
  -3  -2  -2 1896.06   66.79
  -3  -2  -2 1895.14   68.96
   3   2   2 1970.02   70.37
  -3  -2  -3  542.97   16.43
   3   2   3  587.47   21.27
  -3  -2  -4  226.73    9.55
  -3  -2  -4  254.35   10.03
  -3  -2  -4  237.99    9.57
  -3  -2  -4  217.37    9.33
   3   2   4  269.77   17.53
  -3  -2  -5 1135.90   39.90
  -3   2  -5  897.84   39.87
  -3   2  -5  916.21   39.91
  -3   2  -5  874.96   43.61
  -3   2  -5  801.28   40.07
  -3  -2  -5 1109.45   39.77
   3   2   5 1277.99   48.79
  -3  -2  -5 1154.98   40.13
   3   2   5 1042.97   39.73
  -3   2  -6  460.34   19.85
  -3   2  -6  402.13   19.76
  -3   2  -6  395.60   20.20
  -3  -2  -6  545.62   20.05
  -3  -2  -6  516.76   19.72
  -3  -2  -6  548.64   19.62
  -3   2  -7  525.39   22.80
  -3  -2  -7  555.40   22.52
  -3   2  -7  481.30   23.25
  -3  -2  -7  623.55   23.08
  -3   2  -7  494.24   22.78
   3   2   7  626.19   22.57
  -3  -2  -8   73.42    5.09
  -3   2  -8   78.70    6.13
  -3   2  -8   70.19    7.56
  -3   2  -8   92.87    6.49
  -3   2  -9  114.11    7.43
  -3   2  -9  138.60    9.11
  -3   2  -9  149.27    8.10
  -3   2  -9  165.48    8.33
  -3  -2  -9  193.91    7.98
  -3  -2  -9   79.84    6.36
  -3   2 -10   -3.85    4.42
  -3   2 -10   -1.45    4.66
  -3   2 -10   -4.68    6.24
  -3  -2 -10    1.56    4.46
  -3   2 -11   -1.39    3.82
  -3   2 -11   -0.16    4.61
  -3   2 -11    3.01    5.96
  -3  -2 -11    0.09    4.17
  -3  -2 -12   81.52    5.16
  -3   2 -12   80.33    6.56
  -3   2 -12   26.55    3.88
  -3  -2 -12   18.05    3.12
  -3  -2 -13   -7.05    3.82
  -3   2 -13   -0.77    4.69
  -3  -2 -14   41.22    4.43
  -3  -2 -14   40.81    3.78
   3  -3 -17    1.66    2.03
   3  -3 -16   12.36    3.10
   3  -3 -15    1.89    3.53
   3  -3 -14   51.80    5.08
   3   3 -13   -0.12    4.59
   3  -3 -13   -0.97    4.19
   3  -3 -12    5.60    3.48
   3  -3 -12    6.83    4.42
   3   3 -12    3.26    4.98
   3  -3 -12    9.67    4.83
   3  -3 -11    2.68    3.78
   3  -3 -11    4.88    4.41
   3   3 -11    4.39    5.16
   3  -3 -11    8.23    4.89
   3  -3 -10  361.00   15.75
   3   3 -10  379.18   16.15
   3  -3 -10  364.64   15.40
   3  -3  -9  104.74    5.47
   3  -3  -9   91.89    5.31
   3  -3  -8  497.15   19.91
   3  -3  -8  481.03   19.84
   3  -3  -7   10.01    2.43
   3  -3  -7    7.78    2.24
   3  -3  -7    7.81    2.36
  -3  -3   7    7.34    6.00
   3  -3  -6  505.75   20.20
   3   3  -5 1809.65   73.10
   3   3  -4 5276.25  206.69
   3  -3  -3    9.72    3.56
   3   3  -3   29.76    5.57
   3   3  -2 2625.24   95.56
  -3  -3   2 2081.21   96.35
  -3   3   0 2929.86  117.87
  -3   3   0 3093.67  118.00
  -3  -3   0 2983.53  120.36
  -3   3  -1  261.96   13.59
  -3  -3  -1  356.87   18.88
  -3  -3  -1  376.21   16.89
  -3   3  -1  241.21   12.14
  -3   3  -2 1034.97   42.28
  -3  -3  -2 1236.85   44.74
  -3  -3  -2 1331.36   47.67
  -3   3  -2  909.15   40.23
   3   3   3    2.77    2.31
  -3   3  -3    0.25    2.55
  -3  -3  -3   -0.06    2.81
  -3  -3  -4  757.05   26.21
  -3  -3  -4  731.03   25.93
   3   3   4  761.32   35.02
  -3   3  -4  572.46   25.77
   3   3   4  589.21   25.56
  -3  -3  -4  674.37   25.75
  -3  -3  -4  614.95   25.61
  -3  -3  -5  210.76    8.92
  -3   3  -5  171.97    9.05
  -3   3  -5  183.84    9.05
  -3  -3  -5  224.37    9.38
  -3  -3  -5  215.01    9.08
  -3   3  -5  174.99    9.94
   3   3   5  224.94   17.92
   3   3   5  189.56    8.69
  -3  -3  -5  210.39    8.75
  -3   3  -6  554.01   23.61
  -3  -3  -6  586.70   23.31
  -3  -3  -6  614.61   23.64
  -3  -3  -6  611.29   23.36
  -3   3  -6  513.54   23.53
  -3   3  -6  491.93   23.92
   3   3   6  585.64   23.21
  -3  -3  -6  613.85   23.21
  -3   3  -7   36.58    5.23
  -3   3  -7   35.99    4.96
  -3   3  -7   40.69    6.81
  -3  -3  -7   42.08    4.18
   3   3   7   52.69    4.60
  -3  -3  -7   45.62    5.46
  -3  -3  -7   47.25    4.33
  -3   3  -7   43.56    5.10
  -3  -3  -7   50.11    4.72
  -3   3  -8  194.67   10.33
  -3  -3  -8  152.20    9.13
  -3   3  -8  187.70   11.27
  -3  -3  -8  260.78   10.71
   3   3   8  244.63    9.74
  -3   3  -9   11.75    5.12
  -3   3  -9    6.41    6.74
  -3  -3  -9   13.38    5.99
  -3  -3  -9    4.40    2.82
  -3   3 -10   34.60    6.50
  -3   3 -10   32.76    5.25
  -3  -3 -10   47.71    6.16
  -3  -3 -11   73.64    6.44
  -3   3 -11   70.27    6.98
  -3  -3 -11   74.99    5.55
  -3   3 -11   54.59    5.64
  -3  -3 -12   98.94    7.11
  -3  -3 -12   81.26    5.88
  -3  -3 -13   13.09    3.58
  -3  -3 -14    5.04    2.80
   3  -4 -17   -0.32    2.43
   3  -4 -16   11.57    3.18
   3  -4 -16    9.60    2.82
   3  -4 -15   27.26    3.73
   3  -4 -15   28.13    4.20
   3  -4 -14   15.21    4.55
   3  -4 -14   14.85    4.08
   3  -4 -13   55.96    5.23
   3  -4 -13   50.30    5.43
   3  -4 -13   45.76    4.12
   3  -4 -12   11.13    3.51
   3  -4 -12   11.00    4.53
   3  -4 -11  114.17    7.04
   3  -4 -11  106.65    6.28
   3  -4 -10   75.98    5.71
   3  -4 -10   64.99    5.12
   3  -4  -9  136.22    6.73
   3  -4  -9  128.02    6.62
   3  -4  -8  293.28   12.85
   3  -4  -8  308.09   12.73
   3  -4  -8  306.01   12.72
   3  -4  -7  810.44   30.28
   3  -4  -7  722.83   30.27
   3  -4  -7  742.78   30.15
   3  -4  -6   85.04    4.38
   3  -4  -6   80.09    4.27
   3   4  -6   94.11    8.07
   3   4  -5 2896.10  115.36
   3   4  -4  158.76   10.72
  -3  -4   3 5005.35  205.55
   3   4  -3 5374.97  204.88
   3   4  -2    9.97    5.74
  -3  -4   2   16.03    7.65
  -3  -4   1 4100.50  163.60
  -3  -4   0  522.92   26.90
  -3   4  -1  634.58   27.83
  -3  -4  -1  827.94   32.19
   3   4   1  653.38   26.32
  -3  -4  -1  804.28   33.94
  -3   4  -2   41.29    3.35
  -3   4  -2   29.00    3.48
  -3  -4  -2   45.90    3.63
  -3  -4  -2   51.59   10.41
  -3  -4  -2   43.93    3.11
  -3   4  -3  772.25   32.27
   3   4   3  728.47   32.07
  -3  -4  -3  913.97   32.71
  -3  -4  -3  919.45   32.43
  -3  -4  -3  814.25   32.22
  -3  -4  -3  865.01   40.28
  -3  -4  -4  171.07    7.99
   3   4   4  164.17    7.83
  -3  -4  -4  183.11    8.37
  -3  -4  -4  188.18    8.80
  -3  -4  -5  139.36    7.07
  -3  -4  -5  155.18    7.89
  -3  -4  -5  150.03    7.30
  -3  -4  -5  137.96    6.89
   3   4   5  143.74    6.95
   3   4   6   64.09    4.79
  -3  -4  -6   71.46    6.00
  -3  -4  -6   64.28    5.14
  -3  -4  -6   70.25    5.09
  -3  -4  -6   65.33    4.77
  -3   4  -6   66.32    5.61
  -3  -4  -7   39.49    4.61
  -3   4  -7   40.24    5.53
  -3  -4  -7   36.59    4.25
  -3  -4  -7   30.90    5.64
   3   4   7   46.39    4.45
  -3  -4  -7   38.82    4.18
  -3  -4  -8    5.38    4.51
  -3  -4  -8   11.29    4.13
   3   4   8    2.23    4.36
  -3  -4  -8    8.17    5.83
  -3   4  -8    5.77    5.48
  -3  -4  -8    1.69    3.59
  -3  -4  -9   80.23    6.50
  -3  -4  -9   75.53    5.47
  -3  -4 -10   26.76    5.49
  -3   4 -10   15.87    5.04
  -3  -4 -11   44.63    5.67
  -3  -4 -12  111.48    7.17
  -3  -4 -13   73.46    5.44
  -3  -4 -14   27.52    2.93
   3  -5 -16   20.13    2.67
   3  -5 -16   20.04    2.94
   3  -5 -15   46.80    4.11
   3  -5 -14    5.95    3.96
   3  -5 -14    5.02    2.68
   3  -5 -13   17.52    4.31
   3  -5 -13   14.89    3.43
   3  -5 -12   63.54    5.33
   3  -5 -12   54.70    4.63
   3  -5 -11    7.78    3.69
   3  -5 -11    4.61    4.08
   3  -5 -11    5.16    4.14
   3  -5 -10   92.88    6.38
   3  -5 -10  101.94    6.47
   3  -5 -10  104.89    6.11
   3  -5  -9  208.40    9.56
   3  -5  -9  187.97    9.47
   3  -5  -9  192.52    9.18
   3  -5  -9  213.63    9.31
   3  -5  -8  182.56    8.41
   3  -5  -8  185.64    8.44
   3  -5  -8  179.90    8.58
   3  -5  -7  740.91   29.36
   3  -5  -6  138.79    6.55
   3  -5  -6  136.02    6.59
   3   5  -5   65.50    4.42
   3   5  -5   70.38    7.73
   3  -5  -5   59.51    3.77
  -3  -5   5   80.15   10.48
   3   5  -4    0.90    2.69
   3   5  -4   -0.43    5.68
  -3  -5   4    8.55    7.85
   3   5  -3   11.68    2.90
  -3  -5   3   24.10    7.90
   3   5  -3   28.43    7.05
   3   5  -2  729.63   28.99
   3  -5  -2  758.99   28.92
  -3  -5   2  843.71   35.06
  -3  -5   2  678.12   28.83
   3   5  -2  785.45   33.18
   3  -5  -1   85.03    4.70
  -3  -5   1   76.08   11.41
   3   5  -1  108.28    5.44
  -3  -5   1   91.11    5.01
  -3  -5   1   96.67   10.16
  -3  -5   0  171.12    7.80
  -3  -5   0  145.14   13.93
   3   5   0  152.15    7.46
  -3   5  -1  149.84    6.79
   3   5   1  141.65    6.48
  -3  -5  -1  152.55   14.01
  -3  -5  -1  135.39    6.59
   3  -5   1  147.25    6.74
  -3  -5  -2  947.69   43.57
   3  -5   2  824.45   35.20
  -3   5  -2  880.91   35.22
  -3  -5  -2  924.42   35.29
  -3  -5  -2  919.17   35.04
  -3  -5  -3  310.69   12.45
   3  -5   3  292.42   12.51
  -3  -5  -3  329.88   12.68
  -3  -5  -3  269.37   20.04
  -3  -5  -3  259.12   12.14
  -3   5  -3  292.76   12.61
  -3  -5  -4   96.56    5.94
  -3  -5  -4   98.12    5.67
  -3  -5  -4  107.07    6.59
   3   5   4   95.92    5.45
  -3  -5  -5  409.24   17.92
  -3  -5  -5  471.65   18.68
   3   5   5  424.62   17.86
  -3  -5  -5  452.38   18.21
  -3  -5  -6   14.90    3.74
  -3   5  -6   16.30    5.09
  -3  -5  -6   17.68    5.48
  -3  -5  -6   14.54    4.00
  -3  -5  -6   16.23    4.12
   3   5   6   23.01    4.06
  -3   5  -7   11.71    5.50
  -3  -5  -7    8.23    3.90
  -3  -5  -7    7.50    5.65
  -3  -5  -7    6.63    4.23
  -3  -5  -7    3.67    3.88
   3   5   7   10.28    3.95
  -3  -5  -8    8.12    3.99
  -3  -5  -8    9.31    5.46
  -3  -5  -8   11.15    4.30
  -3  -5  -8    6.70    3.51
   3   5   8   10.18    4.18
  -3   5  -8    7.14    5.57
  -3   5  -9   23.60    5.67
  -3  -5  -9   31.64    5.14
  -3  -5  -9   29.26    4.34
  -3  -5  -9   15.43    3.13
   3   5   9   42.36    4.41
  -3  -5 -10    1.69    4.85
  -3  -5 -10   -0.17    3.85
  -3  -5 -11  158.01    7.99
  -3  -5 -11  163.26    8.76
  -3  -5 -12   17.46    4.40
  -3  -5 -12   19.59    3.66
  -3   5 -12   13.61    3.74
  -3  -5 -13   55.06    4.33
   3  -6 -15    6.04    2.71
   3  -6 -14   61.78    4.22
   3  -6 -14   44.73    3.46
   3  -6 -13   -0.44    3.03
   3  -6 -13   -4.03    3.79
   3  -6 -13    1.32    3.63
   3  -6 -12   44.46    4.84
  -3   6  12   46.33    4.59
   3  -6 -12   43.11    4.36
   3  -6 -12   44.85    4.77
   3  -6 -11    4.16    3.56
   3  -6 -11    3.28    3.82
   3  -6 -11    4.78    3.98
   3  -6 -10    8.01    3.79
   3  -6 -10    5.98    3.95
   3  -6 -10    7.02    3.93
   3  -6  -9  306.34   13.09
   3  -6  -9  294.90   13.27
   3  -6  -9  286.85   13.25
   3  -6  -9  323.25   13.23
   3  -6  -8  141.07    8.04
   3  -6  -8  131.43    7.98
   3  -6  -7   12.66    3.38
   3   6  -7    9.70    4.11
   3  -6  -7   12.56    3.38
   3  -6  -6   59.35    3.95
   3   6  -6    6.13    4.05
   3   6  -5   36.35    4.08
   3  -6  -5   37.87    3.44
   3   6  -4   11.56    3.33
   3  -6  -4   15.50    2.77
  -3  -6   4    6.96    7.63
   3   6  -4    5.49    6.78
   3   6  -3    1.94    3.16
   3  -6  -3    3.18    2.48
  -3  -6   3    1.53    7.19
   3   6  -3   -0.44    6.93
   3   6  -2   83.01    9.21
  -3   6   2   80.01    4.81
  -3  -6   2   74.34   10.02
   3   6  -2   70.23    4.18
  -3  -6   2   69.76    4.66
   3   6  -2   67.56    4.81
   3  -6  -2   68.56    4.05
   3   6  -1   65.61    4.05
  -3   6   1   53.63    9.40
  -3  -6   1   69.36    4.42
   3   6  -1   64.91    4.73
  -3   6   1   49.00    4.29
  -3   6   0   15.56    3.45
   3   6   0   15.24    3.00
   3  -6   0   14.66    2.92
  -3   6   0    9.88    7.54
  -3  -6   0   17.95    3.29
  -3   6  -1  314.91   12.99
   3   6   1  315.68   12.52
  -3  -6  -1  305.44   12.59
   3   6   2  181.98    8.11
  -3  -6  -2  194.08    8.54
  -3  -6  -2  192.12    8.23
  -3  -6  -3    0.41    3.12
  -3  -6  -3    3.02    3.79
  -3  -6  -4  103.18    6.05
  -3  -6  -4  104.60    6.40
  -3  -6  -4  100.70    5.82
  -3  -6  -5    7.35    5.75
  -3  -6  -5    2.71    3.95
  -3  -6  -5    4.42    4.14
   3   6   5    7.14    3.81
   3   6   6  110.28    6.43
  -3  -6  -6  103.39    6.37
  -3  -6  -6   94.95    6.52
  -3  -6  -6  113.06    7.55
  -3  -6  -7    3.77    3.86
  -3  -6  -7   -3.45    5.31
  -3  -6  -7   -2.83    4.15
  -3  -6  -7    1.70    3.91
   3   6   7    0.65    4.00
  -3  -6  -8  107.65    6.30
  -3  -6  -8  114.09    7.20
  -3  -6  -8  113.95    6.30
   3   6   8  127.01    6.52
   3   6   9   13.03    3.87
  -3  -6  -9   14.90    4.99
  -3  -6  -9   14.48    3.80
  -3  -6  -9    8.99    2.91
  -3   6 -10  139.51    8.78
  -3  -6 -10  145.37    7.39
  -3  -6 -10  148.82    8.20
  -3   6 -11   -0.15    4.34
  -3  -6 -11    2.29    4.17
  -3  -6 -11   -1.58    3.39
  -3   6 -12   41.38    4.19
  -3  -6 -12   43.13    4.05
  -3  -6 -12   53.65    3.90
  -3  -6 -13   17.74    2.54
   3  -7 -15   59.41    3.57
   3  -7 -14   -0.66    2.16
   3  -7 -14    2.85    2.53
   3  -7 -14   -0.32    2.52
   3  -7 -13   50.34    4.07
   3  -7 -13   55.48    4.20
   3  -7 -13   45.92    3.74
   3  -7 -12   16.81    3.88
   3  -7 -12   14.93    3.76
  -3   7  12   21.22    3.94
   3  -7 -12   12.51    3.53
   3  -7 -11   44.46    4.50
   3  -7 -11   51.92    4.76
   3  -7 -11   54.94    4.61
   3  -7 -10   46.83    4.39
   3  -7 -10   40.86    4.27
   3  -7 -10   46.47    4.47
   3  -7  -9    1.67    3.63
   3  -7  -9    3.63    3.58
   3  -7  -8   22.54    4.17
   3  -7  -8   31.18    4.16
   3   7  -8   26.93    4.66
   3  -7  -7    3.06    3.75
   3   7  -7    9.79    4.36
   3  -7  -7    6.90    3.85
   3  -7  -6   12.11    3.63
   3   7  -6    6.53    4.19
   3  -7  -6    3.80    3.40
   3  -7  -5    2.97    3.15
   3  -7  -5    3.71    3.32
   3   7  -5    2.75    4.00
   3  -7  -5    4.10    3.04
   3  -7  -4   83.62    4.43
   3  -7  -4   86.54    4.71
   3   7  -3   -1.07    4.07
  -3   7   3   -1.58    4.32
   3  -7  -3   -1.37    3.02
   3   7  -2    5.08    4.01
  -3   7   2    7.06    4.31
   3  -7  -2    7.47    3.06
  -3  -7   2    8.47    3.94
   3   7  -2    6.17    3.26
  -3   7   1   21.71    4.25
   3   7  -1   24.44    3.71
  -3  -7   1   22.37    4.06
  -3  -7   0    0.53    3.54
  -3   7   0   -0.53    3.92
   3   7   0    1.70    3.46
  -3   7  -1  188.79    9.43
  -3  -7  -1  180.18    8.91
   3   7   1  207.20    8.92
  -3  -7  -2   19.11    3.69
  -3   7  -2   18.86    4.77
   3   7   2   15.43    3.63
  -3  -7  -2   18.01    4.28
  -3   7  -3  161.83    9.15
  -3  -7  -3  188.32    8.65
  -3  -7  -3  152.92    8.04
   3   7   3  174.88    8.23
  -3  -7  -4    6.59    3.87
  -3   7  -4    2.02    5.40
  -3  -7  -4    0.70    4.37
  -3  -7  -5  116.11    6.54
  -3  -7  -5  126.46    7.20
  -3  -7  -5  108.24    6.55
  -3  -7  -6   67.37    5.22
  -3  -7  -6   74.83    5.43
   3   7   6   78.26    5.48
  -3   7  -7  139.59    9.43
  -3  -7  -7  142.31    7.56
  -3  -7  -7  151.24    7.69
  -3   7  -8   48.99    6.49
  -3  -7  -8   42.66    5.29
  -3  -7  -8   44.22    4.03
  -3  -7  -8   47.46    4.32
  -3  -7  -8   45.14    4.58
   3   7   8   58.85    4.67
  -3  -7  -9  225.14   10.83
  -3   7  -9  258.17   12.35
  -3  -7  -9  213.67   11.28
   3   7   9  285.61   11.10
  -3   7 -10    5.57    4.86
  -3  -7 -10   -0.17    3.80
  -3  -7 -10   -1.21    3.41
  -3  -7 -11   57.66    4.14
  -3   7 -11   69.00    5.36
  -3   7 -12   -0.77    2.70
  -3  -7 -12   -0.67    2.35
   3  -8 -14   37.69    2.70
   3  -8 -14   27.53    2.45
   3  -8 -13   50.83    3.57
   3  -8 -13   45.97    3.44
   3  -8 -12   12.93    3.03
  -3   8  12   13.82    3.36
   3  -8 -12    8.81    3.21
   3  -8 -11   75.87    4.97
   3  -8 -11   71.12    5.02
  -3   8  11   76.03    5.09
   3  -8 -10   54.40    4.51
   3   8  -9  132.11    7.45
   3  -8  -9  142.68    7.17
   3   8  -8   32.24    4.52
   3  -8  -8   36.70    3.88
   3  -8  -8   37.08    4.29
   3  -8  -7    1.95    3.94
   3   8  -7    0.03    4.28
  -3  -8   7   -1.80    4.85
   3  -8  -7    1.51    3.36
   3   8  -6    3.28    4.65
   3  -8  -6    8.16    3.65
  -3  -8   6   14.30    5.26
   3   8  -5   90.00    6.40
   3  -8  -5   83.16    5.49
   3  -8  -5   90.60    5.65
  -3  -8   4   15.99    5.03
   3  -8  -4   50.01    3.86
   3   8  -4    9.87    4.73
   3  -8  -4   36.13    4.04
   3  -8  -3   58.74    4.32
  -3   8   3   75.54    5.85
   3   8  -3   73.19    5.82
  -3  -8   3   70.42    5.77
   3  -8  -3   65.47    4.72
   3  -8  -2    9.81    3.38
   3   8  -2   10.19    4.75
   3  -8  -2   10.83    3.13
  -3   8   2   13.29    4.87
  -3  -8   2   16.65    4.53
   3   8  -2   16.02    3.83
  -3   8   1  173.48    9.11
  -3  -8   1  158.68    8.53
   3   8  -1  161.23    8.01
  -3   8   0   43.37    5.39
   3   8   0   40.56    4.50
  -3   8  -1  321.36   14.74
  -3  -8  -1  308.94   14.07
   3   8   1  349.03   14.08
   3   8   2   57.59    4.89
  -3   8  -2   50.54    5.95
  -3  -8  -2   51.53    5.26
  -3  -8  -2   47.35    4.79
  -3   8  -3   78.74    7.12
  -3  -8  -3   89.02    6.14
  -3  -8  -3   81.64    5.61
   3   8   3   88.32    5.79
  -3   8  -4   72.25    6.99
  -3  -8  -4   77.27    5.78
  -3  -8  -4   71.30    5.31
  -3  -8  -5   85.88    5.71
  -3  -8  -5   75.34    5.32
  -3  -8  -6  211.71    9.91
  -3  -8  -6  206.42    9.85
   3   8   6  225.21    9.96
  -3  -8  -7   90.34    5.65
  -3   8  -7   92.34    7.61
   3   8   7  111.53    6.03
  -3  -8  -7   93.93    5.70
  -3  -8  -8   78.91    5.23
  -3   8  -8   79.09    7.00
  -3  -8  -8   69.15    4.76
  -3   8  -9   34.21    5.64
  -3  -8  -9   21.34    3.47
   3   8   9   30.70    3.68
  -3  -8 -10   27.45    3.08
  -3   8 -10   41.55    4.87
  -3  -8 -11   -0.55    2.13
  -3   8 -11    0.23    3.42
   3  -9 -13   30.74    2.34
   3  -9 -13   25.75    2.48
   3  -9 -12   58.92    3.77
   3  -9 -12   69.16    4.07
   3  -9 -11   41.93    3.48
  -3   9  11   58.32    4.19
   3  -9 -10   51.42    3.98
   3   9  -9   63.45    5.18
   3  -9  -9   66.65    4.58
   3  -9  -9   77.70    5.16
   3   9  -8   22.58    4.33
   3  -9  -8   25.52    3.96
   3   9  -7   75.74    5.99
  -3  -9   7   89.64    6.42
   3  -9  -7   95.98    5.47
   3  -9  -7   86.04    5.59
   3   9  -6  111.51    7.06
   3  -9  -6  119.31    6.36
  -3  -9   6  118.00    7.38
   3  -9  -6  118.72    6.46
   3   9  -5    9.87    4.57
   3  -9  -5   12.37    3.74
   3  -9  -5   14.61    3.67
  -3  -9   5   13.56    4.79
   3   9  -4  131.90    8.60
  -3  -9   4  139.87    8.61
   3  -9  -4  147.24    7.97
   3   9  -3   -5.55    5.26
  -3   9   3   -1.01    5.47
   3  -9  -3    7.94    3.65
   3  -9  -3    7.56    4.19
  -3   9   2  257.02   13.45
  -3  -9   2  198.26   13.24
   3   9  -1   14.06    4.58
   3  -9  -1   39.23    4.21
  -3  -9   1   65.35    5.81
  -3   9   1   91.64    6.48
  -3   9   0  213.63   10.52
   3  -9   0  185.05    8.85
   3   9   0  202.12    9.52
  -3   9  -1    8.62    5.63
   3   9   1    6.19    4.03
  -3   9  -2  424.96   19.67
  -3  -9  -2  465.43   19.02
   3   9   2  458.21   18.81
   3   9   3   17.71    4.00
  -3   9  -3   16.65    5.54
  -3  -9  -3   15.68    4.26
  -3   9  -4  196.14   10.79
   3   9   4  213.45    9.46
  -3  -9  -4  193.21    9.61
  -3  -9  -4  199.06    9.42
  -3  -9  -5    2.12    3.60
  -3  -9  -6   65.43    4.74
  -3   9  -7   -6.27    5.50
   3   9   7    2.58    3.50
  -3  -9  -7    1.15    3.12
  -3   9  -8   92.68    6.67
   3   9   8   87.04    4.84
  -3   9  -9    8.74    4.54
  -3   9 -10   34.74    4.44
  -3  10  12    0.33    1.93
  -3  10  11    7.91    2.57
  -3  10  10    7.13    3.02
   3 -10 -10    7.71    2.68
   3 -10  -9  123.32    6.65
  -3  10   9  148.25    6.97
   3 -10  -8   18.08    3.58
   3 -10  -7  166.79    8.19
   3  10  -7  165.75    8.74
  -3 -10   7  172.23    8.99
   3  10  -6   21.34    4.54
   3 -10  -6   23.13    3.83
  -3 -10   6   22.02    4.83
   3 -10  -5  198.60    9.48
   3 -10  -5  197.33    9.94
   3  10  -5  207.35   10.31
   3 -10  -5  209.52    9.69
   3 -10  -4   53.65    4.47
   3 -10  -4   55.15    4.76
  -3  10   3  110.90    6.80
   3 -10  -3   91.91    5.73
  -3 -10   3  110.21    6.81
  -3  10   2   12.92    4.56
   3 -10  -2   13.26    3.39
  -3 -10   2    9.83    4.58
  -3  10   1   54.86    5.32
  -3 -10   1   49.54    5.30
   3 -10  -1   39.37    3.99
   3  10  -1   52.73    4.54
   3  10   0    7.12    3.72
  -3  10   0    7.60    4.75
   3  10   1  288.95   12.15
  -3  10  -1  253.51   12.91
  -3  10  -2    4.81    5.27
  -3 -10  -2    6.89    4.13
   3  10   2    8.45    3.59
  -3  10  -3  353.31   16.52
  -3 -10  -3  357.02   15.55
   3  10   3  376.04   15.41
  -3  10  -4    4.68    5.80
   3  10   4   16.06    3.71
  -3 -10  -4    9.44    3.85
  -3 -10  -5   46.81    4.16
   3  10   5   51.06    4.37
  -3 -10  -6    0.93    2.94
  -3 -10  -7  130.57    6.13
  -3  10  -8    0.79    4.13
  -3  10  -9   92.75    5.66
   3 -11 -11    4.33    1.69
  -3  11  11    4.93    1.80
  -3  11  10   41.50    2.96
   3 -11 -10   29.22    2.69
   3 -11  -9    3.90    2.37
   3 -11  -8   19.45    2.86
   3 -11  -7   -0.64    2.96
  -3 -11   7   -0.65    3.76
  -3 -11   6   48.45    5.13
   3 -11  -6   39.68    3.79
   3 -11  -5   -1.92    3.22
  -3 -11   5   -2.30    4.24
   3 -11  -5   -6.10    3.72
  -3 -11   4   31.98    4.81
   3 -11  -4   31.67    4.59
  -3  11   2   15.89    4.38
  -3 -11   2   -3.83    4.41
  -3  11   1   29.26    4.86
  -3 -11   1   12.78    4.38
  -3  11   0   79.64    6.20
   3  11   0   97.62    5.71
  -3  11  -1    9.03    4.43
   3  11   1   10.49    3.74
  -3 -11  -2  169.58    8.19
   3  11   2  176.43    8.12
  -3 -11  -3   -0.38    3.34
   3  11   3    0.60    3.34
  -3  11  -3   -2.45    4.63
  -3  11  -4   43.87    5.44
  -3 -11  -4   46.93    4.02
   3  11   4   54.05    4.20
  -3  11  -5   24.16    4.74
  -3 -11  -5   21.00    3.08
   3  11   5   27.67    3.39
  -3 -11  -6   15.37    2.48
   3  11   6   21.03    2.87
  -3  11  -8   15.28    3.19
  -3  12   8   -1.52    2.17
   3 -12  -8   -1.56    1.85
  -3  12   7    7.43    2.54
   3 -12  -7    3.94    1.94
  -3  12   6    2.89    2.72
  -3 -12   6    2.26    3.19
  -3  12   5   18.35    3.09
  -3 -12   5   13.98    3.66
  -3  12   4    8.85    3.03
  -3 -12   4    5.26    3.63
   3 -12  -4    5.17    3.16
  -3  12   3    5.55    3.03
  -3 -12   3    8.49    3.69
   3 -12  -3    8.47    3.78
  -3 -12   2    3.32    3.57
   3 -12  -2    4.50    4.19
  -3 -12   1   -0.44    3.47
  -3  12   0   -0.51    3.67
  -3  12  -1   23.78    4.09
  -3  12  -2    3.10    3.63
  -3 -12  -2    2.20    3.00
  -3  12  -3    4.68    3.56
  -3 -12  -3    8.06    2.72
  -3  12  -4    1.64    3.34
  -3 -12  -4    1.71    2.30
  -3  12  -5    2.73    3.12
  -3 -12  -5    2.61    2.00
  -3  13   6    0.88    1.78
  -3 -13   5    1.45    2.28
  -3  13   5    0.81    1.86
  -3 -13   4    2.30    2.63
  -3 -13   3   -1.17    2.78
   3 -13  -3   -1.53    2.42
  -3 -13   2    1.01    2.68
   3 -13  -2    0.03    2.86
  -3 -13   1    1.09    2.53
   3 -13  -1    1.14    3.21
   3 -13   0   -0.87    3.50
  -3 -13  -1    3.17    2.32
   3 -13   1    3.83    3.48
   3 -13   2    0.25    3.53
  -3 -13  -2    3.72    2.06
  -3 -13  -3    0.17    1.71
   3 -13   4    0.43    3.13
   4   0 -17    1.67    2.66
   4   0 -16   56.36    5.05
   4   0 -15    7.66    4.70
   4   0 -15    4.36    3.43
   4   0 -14   33.87    4.71
   4   0 -14   33.43    5.63
   4   0 -13   40.43    5.41
   4   0 -13   58.24    6.25
   4   0 -12    7.45    5.54
   4   0 -12    4.00    4.78
   4   0 -11   -1.21    4.60
   4   0 -10    5.99    4.21
   4   0  -9    1.14    3.25
   4   0  -8  161.32    7.67
  -4   0   8  177.89   12.77
  -4   0   7   -1.41    5.38
   4   0  -7    0.21    2.44
  -4   0   7   -0.57    3.34
  -4   0   7    1.72    5.52
  -4   0   6  786.94   34.21
   4   0  -6  803.27   31.72
  -4   0   6  796.01   35.08
  -4   0   5   -2.02    6.16
  -4   0   5   -0.30    4.11
  -4   0   4  662.12   29.61
  -4   0   2  683.69   28.37
  -4   0   2  861.13   31.45
  -4   0   1    1.83    3.64
   4   0  -1    6.99    8.76
   4   0  -1   -2.76    4.94
   4   0   0 3984.84  156.76
   4   0   0 3997.00  159.97
   4   0   1    0.38    7.62
   4   0   1    1.59    4.41
   4   0   2 1190.59   46.41
   4   0   2  993.15   49.07
  -4   0  -3   -2.47    5.35
  -4   0  -3   -2.51    4.56
  -4   0  -3   -0.20    3.39
  -4   0  -3   -0.88    2.32
   4   0   3    2.95    4.45
  -4   0  -4  828.66   31.03
   4   0   4  654.99   36.53
  -4   0  -4  783.27   30.74
  -4   0  -4  737.99   31.32
  -4   0  -4  703.95   34.81
  -4   0  -5   -3.16    4.95
  -4   0  -5   -2.67    3.77
  -4   0  -5   -0.78    3.01
  -4   0  -6  744.00   31.14
  -4   0  -6  799.53   31.12
  -4   0  -6  777.92   31.60
  -4   0  -7    3.30    4.84
  -4   0  -7    3.78    5.80
  -4   0  -7    0.32    4.00
  -4   0  -8   -7.35    5.65
  -4   0  -8   -8.65    6.86
  -4   0  -8   -8.31    4.85
  -4   0  -9    1.72    5.05
  -4   0  -9   -4.80    6.62
  -4   0  -9   -1.09    3.95
  -4   0 -10  528.65   15.26
  -4   0 -10  537.10   16.30
  -4   0 -11    2.08    3.26
  -4   0 -11    3.43    4.77
  -4   0 -11    1.19    6.03
  -4   0 -12  289.69   10.06
  -4   0 -12  299.88    9.10
  -4   0 -13    7.22    3.22
   4   1 -17    3.38    2.07
   4  -1 -17    5.85    2.98
   4   1 -16   18.96    3.92
   4  -1 -16   18.38    2.91
   4   1 -15    9.68    4.86
   4  -1 -15   20.82    4.83
   4  -1 -15   15.64    3.79
   4  -1 -14   38.29    4.82
   4  -1 -14   37.53    5.52
   4   1 -14   35.39    5.44
   4   1 -13   -3.04    5.09
   4  -1 -13    6.59    5.04
   4   1 -13   -2.35    4.19
   4  -1 -13    6.57    4.39
   4   1 -12   -3.44    5.35
   4  -1 -12    4.05    5.24
   4   1 -12   -4.79    4.66
   4  -1 -12   -4.29    4.77
   4  -1 -11    7.26    4.64
   4   1 -10   31.18    4.59
   4  -1 -10   25.96    4.44
   4  -1  -9   22.14    3.04
   4   1  -9   17.75    3.80
   4  -1  -9   22.89    3.55
   4   1  -8  163.61    7.68
  -4   1   8  155.15   12.18
  -4  -1   8  166.48   12.47
   4   1  -7    7.65    2.68
  -4  -1   7    9.32    4.78
  -4  -1   7    8.30    7.32
  -4   1   7   -1.17    5.04
  -4  -1   7    8.35    5.93
  -4   1   6  187.37   11.83
  -4  -1   6  190.43   13.70
  -4  -1   5   -1.63    4.93
  -4  -1   5    4.60    7.75
  -4   1   5    1.04    3.99
  -4  -1   4  116.25   10.52
  -4  -1   4  109.40    8.07
  -4  -1   3   22.65    7.76
  -4   1   3   14.80    3.92
   4   1  -2  549.73   24.59
  -4   1   2  564.24   24.08
   4   1  -1  489.15   27.80
   4   1  -1  536.76   23.64
  -4   1   1  521.33   23.11
   4  -1  -1  499.40   26.00
  -4   1   0    2.15    3.46
  -4  -1   0   -1.78    7.54
   4   1   0    1.56    9.49
   4  -1   0    3.37    7.52
   4   1   0    1.28    4.47
   4  -1   1   73.10    9.77
   4   1   1   84.77    7.35
   4   1   1   82.94   11.43
  -4   1  -2  111.68    9.89
   4   1   2  169.94   10.25
  -4  -1  -2  172.32   10.95
   4  -1   2  119.30   11.75
  -4   1  -3 1296.64   65.76
   4  -1   3 1296.50   68.60
  -4   1  -3 1601.84   63.91
  -4  -1  -3 1814.93   64.02
   4   1   3 2002.46   72.37
   4   1   3 2052.96   67.57
  -4   1  -3 1543.84   64.10
  -4   1  -3 1593.98   64.47
  -4  -1  -3 1881.38   68.43
  -4   1  -4   -0.07    3.67
  -4   1  -4   -2.13    4.97
  -4   1  -4    1.01    2.82
  -4  -1  -4    0.20    2.87
   4   1   4    0.84    8.75
   4   1   4    3.40    4.86
  -4   1  -5 1677.05   67.34
  -4   1  -5 1738.52   67.23
  -4  -1  -5 1883.89   67.23
  -4   1  -6   -3.88    4.93
  -4   1  -6    1.77    6.27
  -4  -1  -6    1.47    4.16
  -4   1  -6   -4.20    4.02
  -4  -1  -6    0.06    3.50
  -4   1  -7  797.60   34.08
  -4  -1  -7  930.66   34.04
  -4   1  -7  827.70   34.13
  -4  -1  -7  898.24   33.98
  -4   1  -7  738.96   34.56
  -4   1  -8  114.52    8.14
  -4   1  -8  119.25    7.88
  -4  -1  -8  130.21    7.34
  -4   1  -8  126.34    9.51
  -4   1  -9  121.78    7.47
  -4  -1  -9  141.18    7.45
  -4  -1  -9   92.97    6.48
  -4   1  -9   84.77    6.77
  -4  -1  -9  150.24    8.75
  -4   1  -9  118.06    8.84
  -4   1 -10   -0.64    4.11
  -4  -1 -10   51.53    6.97
  -4   1 -10   -0.87    4.93
  -4   1 -10   -1.97    6.34
  -4   1 -10   -0.43    3.32
  -4  -1 -10   14.60    3.27
  -4  -1 -10   58.82    5.61
  -4  -1 -11  291.83   12.09
  -4  -1 -11  322.71   13.13
  -4   1 -11  280.61   12.95
  -4   1 -11  293.78   12.13
  -4   1 -12    3.75    2.90
  -4  -1 -12    3.89    2.92
  -4   1 -12   20.82    5.67
  -4   1 -12   21.49    4.38
  -4  -1 -12    4.27    4.62
  -4  -1 -12    3.09    5.57
  -4  -1 -13  115.61    6.30
   4  -2 -17    8.55    2.99
   4  -2 -17    6.89    2.12
   4  -2 -16   23.44    4.11
   4  -2 -16   18.70    3.10
   4  -2 -15   91.80    5.99
   4   2 -15   87.37    6.43
   4   2 -14   17.47    4.85
   4  -2 -14   12.25    4.30
   4  -2 -13   78.75    5.90
   4   2 -13   79.28    6.57
   4   2 -12   -5.59    5.31
   4  -2 -12   -3.29    4.53
   4  -2 -11  390.37   16.51
   4   2 -11  431.91   17.01
   4  -2 -10   17.39    4.29
   4  -2 -10   22.25    3.66
   4  -2  -9  420.86   17.53
   4   2  -9  439.68   18.00
   4   2  -8    5.99    3.16
   4  -2  -8    0.34    2.50
   4  -2  -8    1.78    2.89
   4   2  -7   29.12    3.19
   4  -2  -7   20.35    2.85
  -4  -2   7   30.09    6.58
  -4   2   7   34.91    6.73
  -4  -2   6   20.92    8.04
   4  -2  -6   29.97    3.00
  -4   2   6   28.82    6.51
  -4  -2   5 1344.81   63.36
   4   2  -5 1641.87   62.44
  -4   2   4   67.90    3.88
  -4   2   4   71.00    6.72
  -4   2   3  843.90   26.09
  -4   2   3  791.39   27.99
  -4  -2   3  797.51   31.00
   4  -2  -2 1054.31   41.16
  -4  -2   2  649.01   40.38
  -4   2   2 1106.30   37.74
  -4   2   2  788.54   38.14
  -4   2   1  407.96   19.01
   4  -2  -1  430.81   22.10
  -4  -2   1  505.04   24.16
  -4   2   1  397.80   18.85
   4   2  -1  506.51   21.02
  -4  -2   0  648.92   29.60
  -4   2   0  585.47   25.70
  -4   2   0  581.50   25.19
   4   2   0  599.90   26.68
   4  -2   0  562.92   27.61
  -4  -2  -1  822.60   30.92
  -4   2  -1  639.84   28.46
   4   2   1  768.07   29.33
  -4   2  -1  569.82   26.86
   4  -2   1  571.03   29.75
  -4  -2  -2   22.67    3.57
  -4  -2  -2   18.98    7.12
   4   2   2   10.89   11.36
   4  -2   2   12.02    7.75
  -4  -2  -2   23.76    4.96
  -4   2  -2    6.77    6.92
   4   2   2   23.79    2.90
   4   2   2   14.11    5.74
   4   2   3  183.34   16.40
  -4  -2  -3  178.83    7.63
  -4  -2  -3  205.29   12.39
  -4   2  -3  136.82   11.68
  -4  -2  -3  180.93    7.50
  -4   2  -3  135.70    8.54
  -4  -2  -3  202.57    8.83
   4   2   3  187.76   11.07
  -4   2  -3  130.92    7.70
   4  -2   3  109.42   12.10
   4   2   3  150.06    7.28
  -4  -2  -4 1387.49   50.49
  -4   2  -4 1105.50   50.87
  -4   2  -4 1101.02   50.50
  -4   2  -4 1157.12   50.41
   4   2   4 1521.40   60.36
  -4  -2  -4 1391.46   50.44
  -4  -2  -4 1543.77   50.99
   4   2   4 1541.58   54.71
  -4   2  -5  175.26    9.50
  -4   2  -5  177.23    9.24
  -4   2  -5  175.36   10.32
  -4   2  -6  802.52   35.81
  -4  -2  -6  992.43   35.71
  -4   2  -6  788.22   36.34
  -4  -2  -6 1063.87   36.34
  -4   2  -6  832.16   35.83
  -4   2  -7   49.02    5.72
  -4  -2  -7   63.09    4.83
  -4   2  -7   53.31    6.19
  -4   2  -7   51.81    7.76
  -4   2  -8  227.65   11.58
  -4   2  -8  202.72   11.31
  -4   2  -8  230.99   12.76
  -4  -2  -8  234.23   10.78
  -4   2  -8  252.28   11.68
  -4  -2  -9   87.39    6.03
  -4   2  -9   48.53    5.33
  -4  -2  -9   54.38    4.66
  -4   2  -9   71.29    6.08
  -4   2  -9   71.61    7.66
  -4   2  -9   77.68    6.26
  -4   2 -10   16.31    4.67
  -4   2 -10   18.85    4.98
  -4   2 -10   25.09    6.60
  -4  -2 -10   22.60    4.98
  -4  -2 -10    6.39    3.08
  -4   2 -11    1.87    3.99
  -4   2 -11    4.95    4.66
  -4   2 -11   15.57    6.03
  -4  -2 -11   -0.48    4.35
  -4   2 -12   21.14    3.65
  -4  -2 -12   37.40    3.68
  -4  -2 -13   -1.28    3.19
   4  -3 -17   -0.16    2.11
   4  -3 -16   25.89    3.32
   4  -3 -15   17.41    3.92
   4  -3 -14   87.72    6.11
   4   3 -13   72.47    5.90
   4  -3 -13   66.54    5.47
   4  -3 -13   56.21    4.46
   4  -3 -12  381.68   15.99
   4   3 -12  389.01   16.32
   4  -3 -12  402.82   16.25
   4  -3 -11    9.69    4.73
   4  -3 -11    7.98    3.89
   4   3 -11    9.83    5.28
   4  -3 -10  438.09   18.66
   4  -3 -10  468.35   18.78
   4  -3 -10  469.25   19.12
   4  -3  -9    2.72    3.28
   4  -3  -9    5.89    3.29
   4  -3  -9    4.89    3.31
   4  -3  -8  350.93   13.65
   4  -3  -8  305.04   13.47
   4  -3  -8  297.59   13.72
   4   3  -8  365.65   13.96
   4  -3  -7    5.51    2.56
   4  -3  -6  350.28   14.45
  -4   3   6  360.04   19.18
   4   3  -5  184.78   11.53
   4  -3  -5  165.10    7.32
  -4  -3   4 3174.88  130.70
   4  -3  -4 3155.85  125.40
  -4   3   4 3202.49  128.56
   4   3  -4 3658.64  128.97
   4  -3  -4 3243.85  125.35
   4  -3  -3   22.74    6.37
  -4  -3   3   28.92    9.34
  -4   3   3   33.66    5.42
   4   3  -3   40.29    6.39
  -4   3   2 2061.42   87.26
  -4   3   2 2372.39   86.11
   4  -3  -2 2267.79   88.80
  -4   3   1  166.57    9.31
  -4  -3   1  176.11   14.13
  -4   3   1  150.56    9.22
   4   3  -1  192.65   11.43
   4  -3  -1  161.51   11.81
  -4   3   0 1466.17   55.64
  -4   3   0 1254.00   54.90
   4   3   0 1402.58   57.31
  -4  -3   0 1326.70   57.84
   4  -3   0 1448.98   57.91
  -4   3  -1  137.51    9.69
  -4   3  -1  140.13    6.74
  -4  -3  -1  185.97   12.72
  -4  -3  -1  157.40    6.91
  -4   3  -1  124.51    8.04
   4   3   1  178.80   11.07
  -4  -3  -1  159.37   13.75
  -4  -3  -2 1057.05   41.68
  -4  -3  -2 1235.38   47.51
   4   3   2  965.29   41.46
  -4  -3  -2 1240.58   42.46
  -4   3  -2  913.93   44.49
  -4  -3  -2 1127.95   49.54
   4   3   2 1222.23   46.07
  -4  -3  -3   93.27    5.22
  -4   3  -3   78.07    9.09
  -4  -3  -3   93.01    5.11
  -4  -3  -3  107.19    6.52
   4   3   3   93.39    8.75
   4   3   3   83.24    4.92
  -4  -3  -4  612.05   24.03
  -4   3  -4  538.81   24.03
  -4  -3  -4  675.78   24.11
  -4   3  -4  510.71   24.11
  -4   3  -4  523.06   24.57
  -4  -3  -4  719.53   24.85
   4   3   4  723.80   29.34
   4   3   4  591.28   23.87
  -4  -3  -5  297.68   11.91
  -4   3  -5  242.41   12.05
  -4  -3  -5  278.40   11.71
  -4  -3  -5  301.38   12.61
  -4   3  -5  234.64   12.95
   4   3   5  277.06   11.65
  -4   3  -5  229.07   12.07
  -4  -3  -6  199.86    8.90
  -4   3  -6  151.82   10.37
  -4   3  -6  151.75    9.23
  -4  -3  -6  192.89    8.75
  -4   3  -6  179.19    9.35
  -4  -3  -6  202.30    9.80
  -4   3  -6  153.55    9.29
  -4  -3  -7  115.61    6.71
  -4  -3  -7  104.39    6.17
  -4   3  -7   81.88    8.63
  -4   3  -7   86.93    6.95
  -4  -3  -7  122.64    7.80
  -4   3  -7   99.28    7.10
  -4   3  -7   84.76    7.15
  -4   3  -8    8.30    5.36
  -4   3  -8    5.50    5.35
  -4  -3  -8   23.19    6.27
  -4  -3  -8    6.70    3.67
  -4   3  -8   14.16    7.21
  -4   3  -9   48.94    5.70
  -4  -3  -9   36.57    3.94
  -4   3  -9   40.62    6.69
  -4   3  -9   39.25    5.30
  -4  -3 -10   78.88    6.97
  -4   3 -10   57.66    5.90
  -4   3 -11   19.54    4.60
  -4  -3 -11   30.16    5.68
  -4  -3 -12   -0.61    3.70
  -4  -3 -12   -4.54    4.70
  -4  -3 -13   -1.33    2.88
   4  -4 -17   22.71    2.73
   4  -4 -17   22.29    2.43
   4  -4 -16   13.28    3.22
   4  -4 -16   12.09    2.88
   4  -4 -15   39.35    4.28
   4  -4 -15   47.55    4.69
   4  -4 -14   41.95    4.73
   4  -4 -14   45.44    5.08
   4  -4 -13   63.19    5.41
   4  -4 -13   62.81    5.61
   4  -4 -13   50.67    4.45
   4  -4 -12   32.29    4.97
   4  -4 -12   29.58    3.96
   4  -4 -11  402.81   16.92
   4  -4 -11  380.06   16.37
   4  -4 -10    7.40    3.79
   4  -4 -10   10.11    3.66
   4  -4  -9  306.16   13.10
   4  -4  -9  305.17   13.07
   4  -4  -8   -0.38    2.88
   4  -4  -8    1.08    3.19
   4  -4  -8   -0.34    2.99
   4  -4  -7  123.35    5.90
   4  -4  -7  116.92    6.03
   4   4  -6  285.07   15.69
   4  -4  -6  245.18   10.56
   4  -4  -5  410.00   16.83
   4   4  -5  449.41   21.34
   4  -4  -4  358.63   14.77
   4   4  -4  394.96   19.28
   4  -4  -3  473.29   25.73
  -4  -4   3  529.63   28.83
  -4  -4   2   28.52    7.80
  -4  -4   2   18.97    9.12
   4  -4  -2   43.16    3.47
   4  -4  -2   35.07    7.48
   4  -4  -2   38.23    3.24
   4   4  -2   27.32    6.79
  -4   4   1  310.62   16.42
  -4  -4   1  328.81   14.02
   4  -4  -1  319.85   14.00
   4   4  -1  343.23   13.98
   4   4   0   37.59    6.97
  -4  -4   0   34.33   10.07
  -4  -4   0   29.77    8.04
  -4  -4   0   32.12    3.33
   4  -4   0   32.50    3.01
  -4   4   0   33.33    4.89
   4   4   0   34.00    3.11
  -4  -4  -1  267.73   18.50
  -4   4  -1  267.51   10.33
  -4   4  -1  228.97   10.26
  -4  -4  -1  269.53   16.31
   4   4   1  271.55   14.51
   4   4   1  234.56   10.20
  -4  -4  -2  240.36   10.35
  -4  -4  -2  237.15   15.95
  -4   4  -2  220.09   10.06
   4   4   2  234.14   14.10
  -4  -4  -2  232.52   18.44
  -4  -4  -3   95.86    5.55
  -4   4  -3   90.80    5.46
  -4  -4  -3  103.02    7.14
  -4  -4  -3   97.56    5.53
   4   4   3   90.49    5.17
  -4  -4  -4  149.77    7.45
  -4   4  -4  136.94    7.63
  -4   4  -4  125.89    7.62
  -4  -4  -4  160.32    7.60
   4   4   4  148.33    7.29
  -4  -4  -5   48.08    4.65
  -4   4  -5   45.27    5.21
  -4  -4  -5   49.37    4.69
  -4  -4  -5   53.52    6.29
   4   4   5   47.78    4.64
  -4  -4  -6   49.25    5.05
  -4  -4  -6   49.78    4.75
  -4  -4  -6   56.81    6.59
   4   4   6   55.07    5.07
  -4   4  -7   -5.42    5.54
  -4  -4  -7    3.58    6.15
  -4  -4  -7    5.89    4.59
  -4  -4  -7    4.42    3.93
  -4  -4  -8   65.31    5.40
  -4  -4  -8   76.01    6.97
  -4   4  -9   11.47    5.16
  -4  -4  -9    8.27    5.57
  -4  -4  -9    8.53    4.33
  -4  -4  -9    8.38    3.15
  -4   4 -10   89.83    7.38
  -4  -4 -10  139.79    7.96
  -4  -4 -11  127.33    7.82
  -4  -4 -12    6.73    4.10
   4  -5 -16   25.52    3.06
   4  -5 -16   17.46    2.69
   4  -5 -15   24.56    3.71
   4  -5 -14   15.62    2.99
   4  -5 -14   21.46    4.13
   4  -5 -13    3.51    3.44
   4  -5 -13    2.54    4.08
   4  -5 -12    0.84    4.13
   4  -5 -12    4.04    3.49
   4  -5 -11    2.36    3.77
   4  -5 -11   -1.19    4.22
   4  -5 -11    1.40    4.27
   4  -5 -10   83.42    6.01
   4  -5 -10   75.97    5.46
   4  -5 -10   69.76    5.83
   4  -5 -10   80.72    5.55
   4  -5  -9    0.97    4.14
   4  -5  -9    6.95    3.90
   4  -5  -9    2.22    3.87
   4  -5  -8    2.54    3.54
   4  -5  -8   -2.11    3.56
   4  -5  -7   10.50    3.10
   4  -5  -7    7.33    2.95
   4  -5  -6  474.91   19.22
   4   5  -5  580.69   23.31
   4  -5  -5  564.05   23.00
  -4  -5   4  499.34   19.72
   4   5  -4  542.77   25.66
   4  -5  -3  118.58    5.86
  -4  -5   3  104.77    5.79
   4   5  -3  128.60   11.01
  -4  -5   2  903.77   41.64
  -4  -5   2  806.11   34.44
   4   5  -2  874.29   39.68
   4   5  -2  807.41   34.40
  -4  -5   1  240.55   16.49
   4  -5  -1  162.18    9.60
  -4  -5   1  239.65   18.64
  -4  -5   1  292.94   10.09
   4   5  -1  213.22   15.00
   4   5  -1  227.48    9.73
  -4  -5   0  997.81   39.12
   4   5   0  903.10   38.99
  -4   5  -1 1007.09   39.54
   4  -5   1 1046.35   39.78
   4   5   1  964.44   39.36
  -4  -5  -2  830.59   31.57
  -4   5  -2  736.37   31.40
   4  -5   2  799.75   31.65
  -4  -5  -3  473.59   18.93
  -4   5  -3  456.96   19.10
  -4  -5  -3  543.47   20.04
   4  -5   3  397.36   19.11
  -4  -5  -3  498.09   19.08
  -4  -5  -3  418.72   18.74
  -4  -5  -4   55.95    4.95
  -4   5  -4   51.57    5.41
   4  -5   4   43.68    5.53
   4   5   4   55.61    4.69
  -4  -5  -4   67.31    6.92
  -4  -5  -4   56.55    4.90
  -4  -5  -5  199.30    9.95
  -4  -5  -5  214.54   10.09
  -4  -5  -5  220.80   11.28
   4   5   5  221.48    9.96
  -4  -5  -6   25.35    6.51
  -4  -5  -6   19.37    4.56
  -4  -5  -6   14.08    4.19
   4   5   6   17.28    4.56
  -4  -5  -7  307.98   13.99
  -4   5  -7  291.64   14.92
  -4  -5  -7  309.73   13.88
  -4  -5  -7  344.41   14.95
   4   5   7  345.58   14.02
  -4   5  -8    0.62    5.39
  -4  -5  -8    3.51    5.25
  -4  -5  -8    2.90    4.04
  -4  -5  -8    1.66    3.26
  -4  -5  -9  228.48    9.40
  -4   5  -9  178.09   10.32
  -4  -5  -9  153.08    8.59
  -4  -5  -9  227.44   10.18
  -4  -5 -10   57.30    5.00
  -4  -5 -10   56.95    5.90
  -4  -5 -11  188.36    8.42
  -4  -5 -11  176.76    8.90
  -4  -5 -12    7.93    2.96
  -4   5 -12    2.79    3.00
  -4  -5 -13   12.47    2.31
   4  -6 -15    0.90    2.53
   4  -6 -14   -3.00    2.68
   4  -6 -14   -2.29    3.36
   4  -6 -13    2.56    3.32
   4  -6 -13   -3.45    3.81
   4  -6 -13    0.90    3.79
   4  -6 -12   46.21    4.74
   4  -6 -12   37.16    4.64
   4  -6 -12   38.70    4.28
   4  -6 -11   17.65    3.77
   4  -6 -11   17.97    3.98
   4  -6 -11   19.42    4.18
   4  -6 -10   11.74    4.35
   4  -6 -10    9.92    4.13
   4  -6  -9   -2.45    4.15
   4  -6  -9    4.79    3.90
   4  -6  -9   -2.13    4.01
   4  -6  -9   -2.13    3.98
   4  -6  -8   55.28    4.61
   4  -6  -8   44.69    4.64
   4  -6  -7    5.58    3.30
   4   6  -6   17.19    3.94
   4  -6  -6   15.38    3.54
   4  -6  -6   13.86    2.90
   4   6  -5    1.55    3.71
   4  -6  -5    2.28    3.04
  -4  -6   5    4.12    3.87
   4   6  -4    9.61    3.84
  -4  -6   4    8.97    3.67
  -4  -6   3   -6.16    3.65
  -4  -6   2   77.16    5.33
   4   6  -2   76.43    5.23
  -4   6   1   67.59    5.07
   4  -6  -1   58.93    4.70
  -4  -6   1   81.90    5.10
   4   6  -1   79.86    4.86
  -4   6   0  456.71   17.62
   4  -6   0  427.46   17.32
  -4  -6   0  393.99   17.25
   4   6   0  396.46   17.09
   4  -6   1   68.47    5.09
   4   6   1   79.13    4.87
   4  -6   2  486.35   21.59
   4   6   2  556.13   21.36
  -4  -6  -3   43.88    4.60
  -4  -6  -3   40.46    5.07
  -4  -6  -4  366.52   15.45
  -4   6  -4  355.35   15.95
  -4  -6  -4  386.19   15.52
  -4  -6  -4  329.33   15.26
  -4  -6  -5   45.11    5.21
  -4  -6  -5   50.70    5.08
  -4  -6  -5   51.67    6.87
   4   6   5   49.73    5.00
  -4  -6  -6  107.14    6.59
  -4  -6  -6   99.76    6.44
  -4  -6  -6  106.81    7.97
   4   6   6  119.49    6.79
  -4  -6  -7   28.34    3.90
  -4  -6  -7   36.84    5.64
  -4  -6  -7   28.39    4.30
   4   6   7   33.21    4.27
  -4  -6  -8   34.90    4.43
  -4  -6  -8   27.22    3.80
  -4  -6  -8   30.38    5.47
  -4  -6  -9   -1.06    4.67
  -4  -6  -9   -2.26    3.87
  -4  -6  -9   -1.80    2.86
  -4  -6 -10   32.00    3.92
  -4   6 -10   29.31    5.23
  -4  -6 -10   31.14    4.64
  -4   6 -11    8.60    3.93
  -4  -6 -11    3.84    3.10
  -4  -6 -12   29.49    2.84
  -4   6 -12   27.31    3.22
   4  -7 -15    6.31    2.23
   4  -7 -14    4.27    2.24
   4  -7 -14    4.66    2.43
   4  -7 -14    3.22    2.75
   4  -7 -13    7.77    3.14
   4  -7 -13   10.49    3.40
   4  -7 -13    5.21    3.45
   4  -7 -12   44.26    4.39
   4  -7 -12   41.79    4.26
   4  -7 -12   40.13    4.13
   4  -7 -11   11.83    3.80
   4  -7 -11    1.38    3.58
   4  -7 -11    3.12    3.81
   4  -7 -10    4.56    3.70
   4  -7 -10    0.97    3.40
   4  -7 -10    5.40    3.61
   4  -7  -9    8.75    3.86
   4  -7  -9   14.35    3.72
   4  -7  -9    6.43    3.57
   4  -7  -8    0.50    3.69
   4  -7  -8   -0.41    3.85
   4  -7  -7   71.51    5.35
   4   7  -7   72.00    5.75
   4  -7  -7   78.19    5.22
   4   7  -6    9.60    4.28
   4  -7  -6   13.86    3.77
  -4  -7   6    8.12    4.48
   4   7  -5   97.99    6.43
   4  -7  -5   96.90    5.79
  -4  -7   5  108.19    6.47
   4   7  -4    9.65    4.36
   4  -7  -4   12.07    3.55
  -4  -7   4   11.59    4.28
  -4  -7   3   97.15    6.19
   4  -7  -3  100.48    5.67
   4  -7  -2   35.22    3.83
  -4   7   2   41.63    4.92
   4   7  -2   41.38    4.52
  -4  -7   2   43.94    4.53
  -4   7   1  148.58    8.16
  -4  -7   1  146.21    7.91
   4   7  -1  164.96    7.79
  -4   7   0    2.91    4.31
  -4  -7   0   -0.08    3.95
   4   7   0   -0.85    3.86
  -4   7  -1  497.14   21.45
   4   7   1  523.19   21.00
  -4   7  -2   74.92    6.61
   4   7   2   85.96    5.54
  -4   7  -3  257.40   13.16
  -4  -7  -3  290.34   12.52
  -4  -7  -4   38.36    5.02
  -4  -7  -5  335.85   14.67
  -4  -7  -5  325.03   14.63
   4   7   5  354.67   14.63
  -4  -7  -6   26.16    4.21
  -4  -7  -6   23.01    3.87
   4   7   6   23.99    4.25
  -4  -7  -7  231.95   10.37
   4   7   7  256.30   10.49
  -4  -7  -8    4.92    3.73
  -4  -7  -8    2.29    3.12
  -4  -7  -9  199.67    8.96
  -4   7  -9  222.84   10.41
  -4   7 -10   -1.42    4.24
  -4  -7 -10   -0.51    3.01
  -4   7 -11   65.76    4.61
  -4  -7 -11   54.06    3.60
   4  -8 -14    2.45    1.99
   4  -8 -14   11.99    2.22
   4  -8 -13   22.09    2.92
   4  -8 -13   20.22    2.73
  -4   8  13   22.03    2.71
   4  -8 -12    8.07    3.16
  -4   8  12   12.30    3.40
   4  -8 -12    7.42    3.26
   4  -8 -11   14.26    3.65
   4  -8 -11    9.83    3.60
   4  -8 -10    4.58    3.43
   4  -8  -9  107.84    6.19
   4  -8  -9  107.83    6.04
   4   8  -8   22.92    4.17
   4  -8  -8   28.52    3.71
   4  -8  -8   32.62    4.14
   4   8  -7  113.97    7.06
   4  -8  -7  117.46    6.41
   4  -8  -7  127.62    6.73
   4  -8  -6   73.20    5.33
   4  -8  -6   73.80    4.98
  -4  -8   6   74.66    5.98
   4   8  -6   69.36    5.88
   4  -8  -5  114.92    6.72
   4  -8  -5  117.58    6.60
  -4  -8   5  135.39    7.52
   4   8  -5  128.19    7.58
   4  -8  -4   52.09    4.66
   4  -8  -4   46.44    4.41
  -4  -8   4   53.27    5.45
   4  -8  -3  135.42    7.31
  -4  -8   3  155.22    7.93
  -4   8   2   16.77    5.08
   4  -8  -2   15.43    3.88
   4   8  -2   10.36    4.30
  -4  -8   2   15.20    4.63
  -4   8   1   27.27    5.63
  -4  -8   1   32.54    4.95
   4   8  -1   40.28    4.83
  -4   8   0  186.58    9.76
  -4  -8   0  167.97    9.08
   4   8   0  182.83    8.87
  -4   8  -1  111.71    7.80
   4   8   1  130.34    7.10
  -4   8  -2  107.26    7.84
   4   8   2  125.73    6.94
   4   8   3    2.46    4.10
  -4   8  -3   -4.09    5.33
  -4  -8  -3    0.47    4.15
  -4   8  -4   18.01    5.57
  -4  -8  -4   20.96    4.22
  -4   8  -5    1.06    5.53
  -4  -8  -5    5.35    3.61
  -4  -8  -6   90.02    5.70
   4   8   6  105.56    6.12
  -4  -8  -7   29.56    3.99
  -4  -8  -7   26.75    3.50
   4   8   7   29.54    4.00
  -4  -8  -8  221.87   10.14
  -4  -8  -8  226.16   10.01
  -4  -8  -9    5.73    2.50
  -4   8 -10   69.63    4.91
  -4  -8 -10   48.72    3.23
  -4   8 -11    0.82    2.64
   4  -9 -13   36.07    2.56
   4  -9 -13   24.72    2.46
   4  -9 -12   53.73    3.50
   4  -9 -12   59.70    3.75
  -4   9  11    0.75    3.09
   4  -9 -11    1.88    2.57
   4  -9 -10  209.65    9.40
   4  -9  -9    0.66    3.61
   4  -9  -9    1.19    3.13
   4  -9  -8  149.90    7.53
   4  -9  -8  167.50    7.91
   4  -9  -7    7.77    3.68
   4  -9  -6  203.26    9.45
   4  -9  -6  195.45    9.49
  -4  -9   6  208.92    9.87
   4  -9  -5    6.86    3.64
   4  -9  -5    8.46    3.61
  -4  -9   5    8.93    4.28
  -4  -9   4   43.71    5.80
   4  -9  -4   78.89    5.58
   4  -9  -3   50.65    4.14
   4  -9  -3   49.97    4.48
  -4   9   2   75.29    6.60
  -4  -9   2   15.15    5.93
  -4   9   1   -2.00    5.01
   4  -9  -1    2.88    3.35
  -4  -9   1    2.21    4.38
   4   9  -1    3.85    3.91
   4  -9   0   90.72    5.42
  -4  -9   0   93.44    6.36
   4   9   0   90.91    6.25
   4  -9   1   -4.16    3.11
  -4   9  -1   -0.54    5.01
   4   9   1   -0.84    3.88
  -4   9  -2   45.18    5.83
   4   9   2   45.51    4.50
  -4   9  -3    3.85    5.21
  -4  -9  -3   -4.64    3.97
   4   9   3    0.04    3.81
  -4   9  -4   -0.41    5.34
  -4  -9  -4    0.10    3.62
   4   9   4    1.40    3.93
  -4   9  -5   80.70    7.07
  -4  -9  -5   82.90    5.25
  -4  -9  -6   19.08    3.39
  -4  -9  -7  116.02    5.84
  -4   9  -8   -2.26    4.57
  -4  -9  -8    2.80    2.09
  -4   9  -9   92.94    6.05
  -4   9 -10    1.86    2.73
  -4  10  12    7.88    2.00
  -4  10  11  279.01   11.68
  -4  10  10    1.35    2.93
   4 -10 -10   -0.46    2.67
   4 -10  -9  134.91    6.81
   4 -10  -8   -1.64    3.46
   4 -10  -7  230.96   10.38
   4 -10  -6    3.63    3.58
   4 -10  -6    7.30    3.44
  -4 -10   6   -0.41    4.21
   4 -10  -5  104.65    5.87
  -4 -10   5  105.29    6.48
   4 -10  -5   95.57    6.01
   4 -10  -4   -0.71    3.57
   4 -10  -4    2.31    3.49
  -4 -10   4    3.68    4.16
   4 -10  -3   14.37    3.60
  -4 -10   3   19.40    4.30
  -4  10   2    4.28    4.13
  -4 -10   2    3.33    4.09
  -4  10   1   61.63    5.43
   4 -10  -1   52.56    4.39
  -4 -10   1   62.48    5.23
  -4  10   0    6.28    4.65
   4 -10   0    4.46    3.13
  -4 -10   0    5.88    4.12
   4  10   0    5.89    3.69
  -4  10  -1  160.98    9.35
   4  10   1  182.62    8.57
  -4  10  -2   -2.82    5.01
  -4 -10  -2    2.62    3.84
   4  10   2    0.51    3.75
  -4 -10  -3  184.32    8.88
  -4  10  -3  175.68   10.08
   4  10   3  193.79    8.90
  -4  10  -4   35.69    5.79
  -4 -10  -4   34.01    3.83
   4  10   4   42.58    4.09
  -4  10  -5   73.52    6.59
  -4 -10  -5   74.23    4.75
   4  10   5   87.50    4.99
  -4  10  -6    3.57    4.69
  -4 -10  -6    1.43    2.47
  -4 -10  -7    8.63    2.07
  -4  10  -9   -2.65    2.48
  -4  11  11   13.31    1.82
   4 -11 -11    6.07    1.59
   4 -11 -10   14.99    2.19
  -4  11  10   23.67    2.60
   4 -11  -9   18.48    2.46
   4 -11  -8   35.17    3.25
   4 -11  -7   37.21    3.49
  -4 -11   6   52.88    4.77
   4 -11  -6   47.01    4.05
   4 -11  -5   11.14    3.26
  -4 -11   5   14.83    3.93
  -4 -11   4   42.44    4.62
   4 -11  -4   34.47    4.76
   4 -11  -3   45.60    4.01
  -4 -11   3   30.73    4.48
  -4  11   2   11.95    3.97
  -4 -11   2   -9.03    4.32
  -4  11   1   24.22    4.32
  -4 -11   1   27.67    4.15
  -4  11   0    0.84    3.95
  -4  11  -1    3.04    4.04
  -4  11  -2   15.23    4.46
  -4 -11  -2   13.73    3.47
  -4  11  -3    2.90    4.23
  -4 -11  -3   -0.72    2.94
  -4  11  -4   -0.02    4.05
  -4 -11  -4    3.32    2.69
  -4 -11  -5  102.67    5.12
  -4  11  -5  107.64    6.42
  -4  11  -6   10.21    3.56
  -4 -11  -6    5.83    1.87
  -4  12   8   26.56    2.57
  -4  12   7   22.31    2.85
  -4  12   6   16.07    2.84
  -4  12   5   10.76    2.89
  -4 -12   5   10.77    2.98
  -4 -12   4   34.05    3.82
  -4  12   4   33.85    3.31
  -4  12   3   -0.98    2.78
  -4 -12   3    1.53    3.15
   4 -12  -3    5.53    3.34
  -4 -12   2   68.62    4.69
   4 -12  -2   73.00    5.50
  -4 -12   1   10.45    3.19
  -4  12   0   27.61    3.65
  -4  12  -1    5.90    3.32
  -4  12  -2    5.26    3.31
  -4 -12  -2    5.25    2.54
  -4  12  -3    1.08    2.96
  -4 -12  -3    3.02    2.18
  -4  12  -4    2.63    2.87
  -4 -12  -4    4.72    1.95
  -4  12  -5    3.87    2.59
  -4 -12  -5    5.03    1.53
  -4 -13   4   -1.39    2.07
  -4 -13   3    4.88    2.28
  -4 -13   2    2.75    2.31
   4 -13  -2    1.87    2.48
  -4 -13   1   45.77    3.20
   4 -13  -1   41.52    3.64
   4 -13   0   11.29    3.19
   4 -13   1   19.18    3.47
  -4 -13  -2    0.25    1.60
   4 -13   2    1.73    3.03
   4 -13   3    1.86    2.70
   5   0 -17    1.90    2.40
   5   0 -16   31.08    4.17
   5   0 -15   -3.17    4.27
   5   0 -15   -0.62    3.12
   5   0 -14   41.65    5.48
   5   0 -14   29.99    4.57
   5   0 -13   14.98    5.18
   5   0 -13   17.17    4.25
   5   0 -12   55.08    5.50
   5   0 -11   16.57    4.93
   5   0 -10  411.46   17.58
   5   0  -9   -1.79    3.59
   5   0  -8   80.88    5.03
   5   0  -7   -2.11    2.95
  -5   0   7   -5.75    5.99
  -5   0   6  467.89   23.48
   5   0  -6  481.44   19.42
  -5   0   6  478.52   22.58
  -5   0   5   -3.88    6.72
  -5   0   5    1.27    4.74
  -5   0   4 1003.13   43.46
  -5   0   3   -1.71    4.43
  -5   0   2   36.58    5.55
   5   0  -1   -4.87   10.01
  -5   0   0 1617.41   63.50
   5   0   0 1914.16   72.75
  -5   0  -1    2.24    2.26
   5   0   1    5.73    9.02
   5   0   2  102.36   13.10
  -5   0  -3   -0.24    4.17
  -5   0  -3   -0.99    5.55
  -5   0  -4  948.05   38.38
  -5   0  -4  948.61   37.99
  -5   0  -4  988.83   38.88
  -5   0  -5   -1.69    5.14
  -5   0  -5    4.07    6.79
  -5   0  -5    0.21    3.77
  -5   0  -6 1131.99   46.44
  -5   0  -6 1173.61   46.27
  -5   0  -6 1197.16   47.12
  -5   0  -7   -0.75    5.70
  -5   0  -7    2.03    7.46
  -5   0  -7    0.40    4.54
  -5   0  -8   36.75    5.94
  -5   0  -8   33.78    7.35
  -5   0  -8   30.03    4.96
  -5   0  -9   -2.29    5.18
  -5   0  -9    2.05    6.42
  -5   0  -9   -3.35    4.09
  -5   0 -10  181.63    8.79
  -5   0 -10  195.71    9.96
  -5   0 -10  208.28    8.95
  -5   0 -11   -0.15    3.56
  -5   0 -11   -1.33    4.42
  -5   0 -12  107.06    5.71
   5   1 -17   -0.42    1.72
   5  -1 -17    7.62    2.98
   5   1 -16   15.54    3.46
   5  -1 -16   20.27    4.10
   5  -1 -16   11.97    2.49
   5   1 -15    1.69    4.29
   5  -1 -15    7.29    4.54
   5  -1 -15    4.25    3.49
   5   1 -14   15.95    4.79
   5  -1 -14   15.29    4.93
   5  -1 -14   20.62    4.28
   5  -1 -13  109.12    6.75
   5   1 -13  110.53    7.40
   5  -1 -13  125.17    7.48
   5   1 -12  100.19    6.61
   5  -1 -12  108.09    6.87
   5   1 -11  162.82    8.86
   5  -1 -11  176.75    8.90
   5  -1 -10   63.41    4.70
   5   1 -10   65.12    5.42
   5  -1 -10   64.98    5.37
   5   1  -9  198.89    9.58
   5  -1  -9  202.21    9.48
   5   1  -8   12.16    3.47
   5   1  -7  370.82   14.54
   5  -1  -7  321.81   14.13
  -5  -1   7  321.92   18.26
  -5  -1   6   40.70    9.38
   5  -1  -6   54.07    3.96
  -5  -1   6   52.72    6.95
  -5   1   6   48.42    7.23
  -5  -1   5  814.87   37.43
   5  -1  -5  839.67   32.21
   5  -1  -4   14.22    2.60
  -5   1   4    5.38    5.06
  -5  -1   4    7.12    9.35
  -5   1   3 1209.60   53.02
   5  -1  -3 1282.68   50.31
   5   1  -3 1360.26   54.32
  -5  -1   3 1372.52   55.78
   5   1  -2  283.36   14.80
  -5   1   2  232.08   13.31
  -5  -1   2  318.00   17.99
   5  -1  -2  206.22   17.70
   5  -1  -1 1097.77   49.17
  -5   1   1 1081.57   44.56
   5  -1  -1 1046.10   42.01
   5   1   0  236.74   19.42
  -5   1   0  212.12    8.88
  -5  -1   0  206.58    8.88
   5  -1   0  224.91   16.46
   5   1   0  209.74   12.81
   5  -1   0  190.12    8.92
  -5  -1   0  244.40    9.88
   5  -1   1  401.08   23.80
  -5   1  -1  398.87   17.02
  -5  -1  -1  404.80   17.01
   5   1   1  499.48   21.29
   5  -1   1  420.23   17.05
  -5  -1  -1  484.83   17.80
   5   1   1  434.30   26.45
   5  -1   2   15.59    9.27
  -5  -1  -2   25.49    7.03
  -5   1  -2   13.54    4.35
  -5  -1  -2   22.79    4.24
  -5  -1  -2   19.08    5.61
  -5   1  -2   20.45    3.01
  -5   1  -2   15.72    7.33
   5  -1   2   20.24    2.67
   5   1   2   24.14    5.92
  -5   1  -3 1591.82   62.26
   5  -1   3 1563.70   61.45
  -5   1  -3 1569.07   61.79
  -5   1  -4  239.32   10.91
  -5  -1  -4  266.43   10.91
  -5   1  -4  235.80   12.46
   5  -1   4  245.10   10.75
  -5   1  -4  235.43   11.57
  -5   1  -5 1312.20   53.81
  -5   1  -5 1333.09   53.57
  -5   1  -5 1252.32   54.23
  -5   1  -6   -5.49    6.04
  -5  -1  -6   -8.36    5.75
  -5   1  -6   -7.09    7.34
  -5   1  -6   -3.64    5.08
  -5  -1  -6   -3.65    4.45
  -5  -1  -7   95.71    6.97
  -5   1  -7   70.08    6.69
  -5  -1  -7   78.52    6.03
  -5   1  -7   88.46    8.92
  -5   1  -7   83.85    7.38
  -5  -1  -8  169.42    8.61
  -5   1  -8  114.78    8.09
  -5  -1  -8  136.75    7.82
  -5   1  -8  145.18    9.74
  -5   1  -8  147.65    8.53
  -5  -1  -9  266.75   10.92
  -5   1  -9  232.31   10.94
  -5   1  -9  157.72   10.31
  -5  -1  -9  188.37   10.31
  -5   1  -9  207.08   11.71
  -5  -1  -9  284.93   12.09
  -5   1  -9  225.66   10.84
  -5   1 -10    2.45    4.05
  -5   1 -10    1.21    4.88
  -5  -1 -10    6.01    4.86
  -5  -1 -10    4.24    6.08
  -5  -1 -10    0.89    3.48
  -5   1 -11  109.82    7.42
  -5  -1 -11  133.76    7.31
  -5   1 -12   -0.28    2.81
  -5  -1 -12    2.81    2.81
  -5  -1 -12   -3.12    3.52
   5  -2 -17   42.65    3.51
   5  -2 -17   22.06    2.46
   5  -2 -16   18.51    3.93
   5  -2 -16   14.08    3.07
   5   2 -15   10.52    4.04
   5  -2 -15   13.60    4.51
   5  -2 -15    9.87    3.66
   5   2 -14    5.80    4.50
   5  -2 -14    5.56    4.02
   5  -2 -13  174.57    9.04
   5   2 -13  175.25    9.34
   5  -2 -12   17.84    4.63
   5  -2 -12   14.62    3.52
   5  -2 -11  124.89    6.84
   5  -2 -11  130.13    7.65
   5  -2 -10   77.11    5.40
   5   2 -10   86.62    6.00
   5   2  -9  268.83   12.18
   5   2  -8  117.12    6.15
   5  -2  -8   96.37    5.89
   5  -2  -7    1.75    3.05
   5   2  -7    4.51    3.18
   5  -2  -6   11.72    2.86
  -5  -2   6    3.97    8.72
  -5   2   6   11.86    5.21
   5  -2  -6   12.53    3.07
   5  -2  -5   82.17    5.03
  -5  -2   5   72.40   10.85
  -5   2   4   95.98    6.30
   5  -2  -4  101.05    5.54
  -5  -2   4   78.04   10.94
   5   2  -4   99.39    9.24
  -5   2   4   78.56    7.78
   5  -2  -4   97.16    5.13
  -5  -2   3  201.98   15.53
  -5   2   3  218.65   10.32
  -5   2   3  198.05   11.40
  -5  -2   2  278.23   18.12
  -5   2   2  255.36   12.98
   5   2  -2  260.77   14.53
  -5   2   2  244.37   13.60
   5  -2  -2  266.74   10.94
   5  -2  -1   13.50    8.74
  -5  -2   1   13.76    8.89
  -5   2   1   11.53    5.59
   5  -2  -1    8.67    2.35
   5   2  -1   10.92    5.54
  -5   2   1    6.76    4.13
   5  -2   0  418.76   24.06
  -5   2   0  461.65   17.37
  -5  -2   0  422.02   17.33
  -5   2   0  460.91   20.83
   5   2   0  432.70   21.31
   5  -2   0  406.92   17.36
  -5  -2   0  477.94   25.49
  -5  -2   0  457.96   17.99
  -5  -2  -1  116.40   10.40
   5  -2   1   82.30   11.74
  -5   2  -1   98.43    5.22
  -5   2  -1  103.03    9.54
  -5  -2  -1  104.22    5.29
   5   2   1  128.44    9.70
   5  -2   1   95.73    5.07
  -5  -2  -1  114.27    6.39
  -5  -2  -2   64.38    5.07
  -5   2  -2   51.69    4.09
  -5  -2  -2   64.33    6.59
  -5  -2  -2   58.97    8.75
   5   2   2   60.02    7.76
  -5   2  -2   51.16    8.92
   5  -2   2   57.00    3.81
   5  -2   2   35.87    9.86
  -5  -2  -3    1.68    3.98
  -5  -2  -3    0.20    5.83
  -5   2  -3    0.35    4.43
   5  -2   3    1.87    2.53
  -5   2  -4  280.99   13.51
  -5  -2  -4  328.10   13.32
  -5  -2  -4  358.38   14.97
  -5  -2  -4  328.70   13.74
  -5   2  -4  259.63   13.84
  -5   2  -5   64.67    5.94
  -5  -2  -5   78.89    5.24
  -5   2  -5   55.35    7.79
  -5  -2  -5   88.72    7.94
  -5   2  -5   61.01    6.49
  -5  -2  -6   59.05    4.81
  -5  -2  -6   61.54    7.74
  -5   2  -6   35.36    6.36
  -5   2  -6   37.42    7.77
  -5   2  -6   32.96    5.80
  -5  -2  -7   33.54    4.48
  -5   2  -7   31.55    6.27
  -5   2  -7   26.69    7.52
  -5   2  -7   29.41    5.64
  -5   2  -8  101.12    7.32
  -5   2  -8   75.02    6.77
  -5   2  -8   88.07    8.27
  -5   2  -8   94.38    7.20
  -5   2  -9  123.82    8.02
  -5  -2  -9  118.00    7.15
  -5   2  -9  134.04    8.01
  -5  -2 -10  163.07    9.03
  -5   2 -10  171.50    9.75
  -5   2 -11   36.01    4.59
  -5  -2 -11   53.30    4.77
  -5  -2 -12   25.98    2.99
  -5  -2 -12   30.68    3.78
   5  -3 -17    1.42    1.98
   5  -3 -16   56.80    4.13
   5  -3 -15   10.75    3.79
   5  -3 -14   42.11    4.79
   5  -3 -13    2.79    3.18
   5   3 -13    3.65    4.30
   5  -3 -13    5.62    4.21
   5  -3 -12  320.06   13.15
   5   3 -12  300.74   13.30
   5  -3 -11   43.91    4.54
   5  -3 -11   51.59    5.39
   5  -3 -10  346.54   14.11
   5  -3 -10  313.52   13.91
   5  -3 -10  323.55   14.38
   5  -3  -9  134.75    6.78
   5  -3  -9  117.81    6.50
   5  -3  -9  127.83    7.03
   5  -3  -8  121.96    6.88
   5   3  -8  147.62    7.21
   5  -3  -7   26.67    3.43
   5   3  -7   28.49    3.60
   5  -3  -6   60.56    4.26
  -5  -3   6   38.47   10.98
  -5  -3   5   41.49   10.07
   5  -3  -5   53.27    4.10
   5   3  -5   60.52    8.15
  -5   3   5   57.01    7.40
   5  -3  -5   64.34    4.09
   5  -3  -4  486.49   19.04
   5   3  -4  464.53   23.43
  -5   3   4  422.21   22.13
  -5   3   3  164.52    8.80
   5  -3  -3  182.30    7.87
  -5  -3   3  129.69   13.87
  -5   3   3  146.15   10.22
   5   3  -3  168.73   11.70
  -5   3   2  934.28   25.60
  -5  -3   2  379.98   27.64
   5  -3  -2  732.89   29.47
  -5  -3   2  451.54   21.81
  -5   3   2  482.25   24.60
   5  -3  -2  646.43   22.30
   5  -3  -1    2.77    8.57
  -5   3   1    8.33    5.40
  -5   3   1    9.51    2.66
  -5  -3   1    6.17    2.83
   5  -3  -1    6.73    2.68
  -5  -3   1   11.76    9.82
  -5   3   1    2.70    4.00
   5   3  -1    8.81    6.18
   5  -3   0   83.81   11.33
  -5   3   0   91.81    4.62
  -5   3   0   95.03    8.68
  -5   3   0   86.60    4.82
  -5  -3   0   79.83    4.70
   5   3   0   77.54    8.74
  -5   3   0   62.28    6.50
  -5  -3   0   67.69    9.20
   5  -3   0   80.47    4.76
  -5  -3   0   79.89   11.64
  -5  -3   0   83.51    5.72
  -5  -3  -1   17.81    7.71
  -5  -3  -1    8.23    4.30
  -5   3  -1    4.54    6.48
  -5   3  -1   11.88    3.03
   5  -3   1    8.18    8.01
  -5  -3  -1   10.33    2.93
   5  -3   1   10.84    2.83
   5   3   1   10.49    6.12
  -5  -3  -2    7.14    6.83
  -5  -3  -2    1.54    4.10
  -5   3  -2    1.40    3.42
   5  -3   2    2.41    3.00
   5   3   2   -2.21    6.13
  -5  -3  -3  120.45    6.98
  -5  -3  -3  113.98    8.41
  -5  -3  -4    8.22    5.12
  -5  -3  -4    2.23    6.96
  -5   3  -4    6.82    5.09
  -5  -3  -4    7.87    3.93
  -5  -3  -5   83.08    6.37
  -5   3  -5   64.20    6.19
  -5  -3  -5   81.13    5.50
  -5  -3  -5   85.28    8.17
  -5  -3  -6   43.75    5.84
  -5  -3  -6   53.65    7.64
  -5  -3  -6   40.62    4.71
  -5  -3  -7   20.16    5.42
  -5  -3  -7   27.57    7.02
  -5   3  -7   12.27    5.27
  -5  -3  -7   20.89    4.05
  -5   3  -8   42.77    5.88
  -5  -3  -8   49.05    4.62
  -5  -3  -8   60.06    7.04
  -5   3  -9   16.94    5.13
  -5  -3  -9   23.43    6.16
  -5  -3  -9   11.56    3.53
  -5  -3 -10  138.24    7.48
  -5   3 -10  134.15    8.39
  -5   3 -11    0.25    4.05
  -5  -3 -12   90.65    4.71
  -5  -3 -12  101.87    5.37
   5  -4 -17   34.54    3.03
   5  -4 -16   -2.51    3.15
   5  -4 -16    1.17    2.65
   5  -4 -15   73.01    5.10
   5  -4 -15   74.33    5.42
   5  -4 -14   16.86    3.29
   5  -4 -14   21.69    4.49
   5  -4 -14   21.16    4.29
   5  -4 -13   63.26    5.41
   5  -4 -13   54.49    4.61
   5  -4 -12   14.81    3.74
   5  -4 -12   18.86    4.69
   5  -4 -11  101.82    5.84
   5  -4 -11   79.79    5.53
   5  -4 -10   -1.06    3.93
   5  -4 -10   -2.01    3.88
   5  -4  -9   -7.22    4.19
   5  -4  -9   -7.40    3.95
   5  -4  -8   49.14    4.15
   5  -4  -8   50.08    4.31
   5  -4  -7   -2.44    3.15
   5  -4  -6  440.38   18.06
   5  -4  -5   51.25    3.84
   5  -4  -4  114.07    6.15
   5  -4  -3    5.14    2.85
  -5  -4   3   -3.77    3.11
  -5   4   3    5.54    5.05
  -5  -4   2  174.54   16.84
  -5   4   2  175.23   12.91
   5  -4  -1   36.72    4.06
   5  -4  -1   29.10    3.38
   5  -4  -1   20.11    8.65
  -5  -4   1   26.10    3.36
  -5   4   1   21.46    4.84
  -5   4   0  457.16   21.61
  -5   4   0  465.82   18.12
  -5   4   0  481.13   18.18
  -5  -4   0  420.02   18.07
   5  -4   0  431.07   18.33
  -5  -4   0  418.57   18.50
  -5   4  -1    0.85    3.23
  -5  -4  -1    0.89    4.22
  -5   4  -1    1.59    3.28
  -5  -4  -1    1.79    3.24
   5  -4   1   -0.02    3.30
  -5  -4  -2  721.86   26.10
  -5   4  -2  690.47   25.70
  -5   4  -2  661.29   25.76
  -5  -4  -3  221.73   10.03
  -5   4  -3  198.44    9.75
  -5  -4  -3  213.38   11.47
   5   4   3  193.53    9.44
  -5  -4  -4   95.12    6.46
  -5   4  -4   79.06    6.26
  -5   4  -4   80.03    6.43
  -5  -4  -4   90.97    5.78
  -5  -4  -4   86.20    8.12
  -5  -4  -5  171.07    8.86
  -5   4  -5  146.95    9.00
  -5   4  -5  133.13    8.86
  -5  -4  -5  176.60    8.24
  -5  -4  -5  174.50   10.27
  -5  -4  -6  131.70    7.91
  -5  -4  -6  119.66    7.11
  -5  -4  -6  131.79    9.25
  -5  -4  -7  415.79   16.89
  -5  -4  -7  427.96   17.70
  -5   4  -8    5.92    5.40
  -5  -4  -8   20.36    4.74
  -5  -4  -8   24.11    5.99
  -5  -4  -8   19.08    3.67
  -5  -4  -9  253.08   10.56
  -5   4  -9  178.46   10.94
  -5  -4  -9  194.81    9.80
  -5  -4  -9  255.09   11.28
  -5   4 -10   -0.79    4.62
  -5  -4 -10   11.16    4.10
  -5  -4 -10    6.45    2.96
  -5   4 -12    1.49    2.53
   5  -5 -16   12.73    2.72
   5  -5 -16   11.90    2.52
   5  -5 -15    4.68    3.41
   5  -5 -14   35.72    4.41
   5  -5 -14   24.59    3.36
   5  -5 -13  108.40    6.52
   5  -5 -13   89.90    5.72
   5  -5 -12   31.17    4.20
   5  -5 -12   42.94    4.78
   5  -5 -11   58.19    5.35
   5  -5 -11   49.45    5.19
   5  -5 -11   49.13    4.61
   5  -5 -10   53.05    4.91
   5  -5 -10   49.12    4.83
   5  -5 -10   52.70    5.28
   5  -5  -9   14.85    4.13
   5  -5  -9   17.73    3.97
   5  -5  -8   89.19    5.52
   5  -5  -8   74.34    5.07
   5  -5  -8   78.67    5.17
   5  -5  -7  189.89    8.75
   5  -5  -6  172.71    8.06
   5  -5  -5  275.57   11.80
   5  -5  -4  154.32    7.65
  -5  -5   4  174.94    7.84
  -5  -5   3  104.08    5.91
   5  -5  -2  365.36   10.21
  -5  -5   2  124.56    8.84
   5  -5  -1  616.01   24.14
  -5  -5   1  568.33   23.72
  -5   5   0  271.52   10.57
  -5  -5   0  207.85   10.28
   5  -5   0  270.62   11.12
   5   5   0  198.26   10.20
  -5   5  -1  939.28   36.12
   5  -5   1  917.20   36.47
  -5  -5  -1  925.60   36.02
   5   5   1  880.49   35.91
  -5  -5  -1  865.56   36.28
  -5  -5  -2  254.29   11.94
  -5   5  -2  248.02   11.55
   5  -5   2  253.91   12.04
  -5  -5  -3  733.10   28.48
  -5   5  -3  692.40   28.49
   5  -5   3  665.32   28.79
  -5  -5  -3  696.40   28.20
  -5  -5  -4   48.71    5.52
  -5   5  -4   39.30    5.72
   5  -5   4   37.62    6.07
  -5  -5  -4   50.01    4.90
   5   5   4   45.79    4.95
  -5  -5  -5  517.44   20.77
  -5   5  -5  490.27   21.18
   5  -5   5  433.41   21.27
  -5  -5  -5  505.62   20.44
  -5  -5  -5  507.20   21.71
  -5  -5  -6   17.14    4.88
  -5  -5  -6    9.96    6.21
  -5  -5  -6    4.27    4.12
  -5  -5  -7  113.43    6.78
  -5  -5  -7  103.80    6.25
  -5  -5  -7  106.14    7.84
  -5  -5  -8   76.29    5.69
  -5  -5  -8   60.57    4.76
  -5  -5  -8   78.90    6.61
  -5   5  -8   62.29    6.71
  -5  -5  -9   21.05    4.24
  -5  -5  -9   12.22    3.23
  -5  -5 -10   -0.47    3.61
  -5   5 -11    3.04    3.57
  -5  -5 -11    2.91    2.87
   5  -6 -15    5.14    2.77
   5  -6 -14    7.66    2.87
   5  -6 -14   10.55    3.48
   5  -6 -14   14.51    3.51
   5  -6 -13   -2.56    3.36
   5  -6 -13   -1.92    3.74
   5  -6 -13   -1.03    3.70
   5  -6 -12   25.51    4.12
   5  -6 -12   32.23    4.54
   5  -6 -12   30.85    4.54
   5  -6 -11    2.09    3.99
   5  -6 -11    2.57    3.74
   5  -6 -11    3.90    3.88
   5  -6 -10   -5.02    4.13
   5  -6 -10   -3.67    3.90
   5  -6 -10   -3.36    3.91
   5  -6  -9   -3.18    4.12
   5  -6  -9   -3.95    4.17
   5  -6  -9   -1.41    3.90
   5  -6  -8   72.59    5.16
   5  -6  -7   -1.35    3.60
   5  -6  -7   -0.06    3.03
   5  -6  -6  247.95   10.76
   5  -6  -6  235.12   10.52
  -5  -6   5   24.02    4.12
  -5  -6   4  152.71    7.71
  -5  -6   3   94.40    5.88
   5  -6  -2  460.99   16.01
  -5  -6   2  305.53   15.28
   5  -6  -1  126.55    7.18
  -5  -6   1  113.38    7.09
  -5  -6   0 1003.31   40.64
   5   6   0  973.20   40.56
   5  -6   1    9.75    4.45
  -5  -6  -1    2.55    4.14
   5   6   1   11.52    4.05
   5  -6   2  425.50   19.61
   5   6   2  483.66   19.15
   5  -6   3    1.92    4.92
  -5  -6  -3    3.13    5.21
  -5  -6  -3    5.68    4.23
  -5  -6  -4  224.21   10.86
  -5   6  -4  214.49   11.38
  -5  -6  -4  223.71   10.41
   5   6   4  242.31   10.52
  -5   6  -5   -0.33    5.51
  -5  -6  -5    2.78    4.51
  -5  -6  -5    2.49    3.76
  -5  -6  -6  266.68   11.95
  -5  -6  -6  256.54   11.64
  -5  -6  -7   -3.33    4.11
  -5  -6  -7    0.79    3.36
  -5  -6  -8  158.99    7.59
  -5  -6  -8  129.03    6.94
  -5   6  -9   20.91    5.22
  -5  -6  -9   17.99    3.03
  -5  -6  -9   28.42    3.97
  -5   6 -10   96.68    6.32
  -5  -6 -10   97.21    5.37
  -5   6 -11    1.00    2.99
  -5  -6 -11   -0.97    2.27
   5  -7 -15   -1.26    2.07
   5  -7 -14   -0.79    2.30
   5  -7 -14    0.76    2.23
   5  -7 -14    1.92    2.69
   5  -7 -13   38.35    3.90
  -5   7  13   29.22    3.32
   5  -7 -13   26.37    3.53
   5  -7 -13   29.36    3.59
   5  -7 -12    1.87    3.40
   5  -7 -12   -0.37    3.55
   5  -7 -12   -1.10    3.62
   5  -7 -11   44.24    4.55
   5  -7 -11   38.56    4.41
   5  -7 -11   47.53    4.54
   5  -7 -10   27.68    3.91
   5  -7 -10   32.13    4.12
   5  -7 -10   19.56    3.72
   5  -7  -9   22.00    4.05
   5  -7  -9   18.86    4.01
   5  -7  -9   19.08    3.70
   5  -7  -8   -2.53    3.60
   5  -7  -8   -0.98    3.75
   5  -7  -7  262.46   11.78
   5  -7  -7  262.52   11.56
   5  -7  -6    0.75    4.06
   5  -7  -5  145.51    7.71
  -5  -7   5  156.70    7.90
   5  -7  -4   43.07    4.31
  -5  -7   4   49.17    4.82
   5  -7  -3  132.40    7.09
  -5  -7   3  146.53    7.52
  -5  -7   2   73.18    5.55
  -5   7   1  635.91   26.28
  -5  -7   1  643.89   26.03
  -5   7   0    8.73    4.84
   5  -7   0    4.87    4.45
  -5  -7   0    5.30    4.33
   5   7   0    7.23    4.38
  -5   7  -1  349.28   16.05
   5  -7   1  335.73   15.78
   5   7   1  385.97   15.52
  -5   7  -2  109.72    7.81
   5  -7   2   97.08    7.18
   5   7   2  121.94    6.88
   5  -7   3  234.07   12.10
  -5  -7  -3  284.56   11.93
  -5  -7  -4   39.87    4.46
  -5  -7  -4   39.00    4.79
  -5  -7  -5  187.51    9.16
  -5  -7  -5  199.46    9.40
  -5   7  -6   -1.58    5.70
  -5  -7  -6    1.58    4.02
  -5  -7  -6   -1.04    3.36
  -5  -7  -7  150.55    7.57
  -5  -7  -7  161.75    8.02
  -5  -7  -8   13.45    3.56
  -5  -7  -8   11.41    2.86
  -5  -7  -9   32.22    2.82
  -5  -7  -9   29.58    3.42
  -5  -7 -10    1.46    2.10
  -5   7 -10    2.77    3.36
   5  -8 -14   -1.17    1.81
   5  -8 -14    0.31    1.95
   5  -8 -13   38.41    3.31
  -5   8  13   37.23    3.03
   5  -8 -12   16.38    3.30
   5  -8 -11   26.69    3.83
   5  -8 -10   -4.66    3.44
   5  -8  -9   29.34    4.08
   5  -8  -9   34.34    4.01
   5  -8  -8  114.35    6.52
   5  -8  -8  113.47    6.33
   5  -8  -8  116.80    6.58
   5  -8  -7   72.24    5.30
   5  -8  -7   75.12    5.00
   5  -8  -6  126.90    7.00
   5  -8  -6  122.96    6.62
  -5  -8   6  133.33    7.15
   5  -8  -5   27.05    4.23
   5  -8  -5   32.01    4.11
  -5  -8   5   35.80    4.55
   5  -8  -4   79.65    5.56
  -5  -8   4   78.72    5.75
   5  -8  -3   74.96    5.56
  -5  -8   3   84.56    5.87
   5  -8  -2  110.64    6.65
  -5  -8   2  110.60    7.03
  -5   8   1   15.89    5.28
  -5  -8   1   13.91    4.70
  -5   8   0  146.81    8.46
  -5  -8   0  136.41    7.70
   5   8   0  134.56    7.58
  -5   8  -1   12.02    5.04
   5   8   1   16.15    4.26
  -5   8  -2   12.23    5.13
   5   8   2    9.74    4.14
  -5   8  -3    3.19    5.00
  -5  -8  -3    5.35    3.74
   5   8   3    5.78    3.90
  -5   8  -4   47.66    6.08
  -5  -8  -4   48.49    4.52
  -5   8  -5   19.64    5.73
  -5  -8  -5   19.58    3.60
  -5   8  -6   87.14    6.97
  -5  -8  -6   81.60    4.99
  -5  -8  -7   26.35    3.27
  -5  -8  -8   93.39    4.68
  -5   8  -9   43.86    4.53
  -5   8 -10   16.56    3.00
   5  -9 -12   46.54    3.17
  -5   9  12   55.98    3.65
   5  -9 -11    2.05    2.71
   5  -9 -10   74.45    4.63
   5  -9 -10   76.75    4.97
   5  -9  -9   31.51    3.62
   5  -9  -9   38.54    4.10
   5  -9  -8   94.01    5.49
   5  -9  -8  112.24    6.12
   5  -9  -7   34.21    4.27
   5  -9  -6  147.47    7.63
  -5  -9   6  153.25    7.82
   5  -9  -6  143.69    7.63
   5  -9  -5   38.70    4.19
  -5  -9   5   40.99    4.57
   5  -9  -5   39.53    4.22
   5  -9  -4   21.72    3.96
  -5  -9   4   19.89    4.28
   5  -9  -3   22.94    3.82
   5  -9  -3   31.41    3.73
  -5  -9   3   24.43    4.22
  -5   9   2   10.59    4.37
   5  -9  -2   17.57    3.47
  -5  -9   2   12.22    4.42
  -5   9   1  100.56    6.78
  -5  -9   1  103.08    6.33
  -5   9   0   -2.15    4.81
  -5  -9   0   -3.33    3.99
  -5   9  -1  174.82    9.48
  -5   9  -2    5.79    4.91
  -5   9  -3    1.61    5.09
  -5  -9  -3    2.91    3.54
  -5   9  -4   17.32    5.39
  -5  -9  -4   18.74    3.48
  -5   9  -5    4.03    4.93
  -5  -9  -5    2.54    2.87
  -5   9  -6   15.89    4.96
  -5  -9  -6   12.32    2.83
  -5  -9  -7   56.83    3.49
  -5  -9  -8   21.23    1.92
  -5   9  -9   10.39    2.91
   5 -10 -11   68.21    4.37
  -5  10  11  103.52    4.70
   5 -10 -10    2.34    2.71
   5 -10  -9   90.59    5.25
   5 -10  -8    2.24    3.15
   5 -10  -7  147.49    7.29
   5 -10  -7  147.89    7.42
   5 -10  -6    1.32    3.48
   5 -10  -6    0.89    3.53
  -5 -10   6    3.73    3.77
   5 -10  -5  103.80    5.97
  -5 -10   5  103.91    6.30
   5 -10  -5  100.39    5.94
   5 -10  -4  120.69    6.42
  -5 -10   4  124.08    6.70
   5 -10  -4  106.79    6.42
   5 -10  -3    6.52    3.49
  -5 -10   3   12.05    3.89
   5 -10  -2   24.40    3.72
  -5 -10   2   29.44    4.20
  -5  10   1    1.86    4.12
   5 -10  -1    7.70    3.30
  -5 -10   1   10.44    3.82
  -5  10   0   46.69    5.22
   5 -10   0   39.27    3.93
  -5 -10   0   44.66    4.48
  -5  10  -1    0.74    4.59
  -5  10  -2   28.36    5.07
  -5  10  -3   95.66    6.83
  -5 -10  -3   87.47    5.20
  -5  10  -4   57.60    5.78
  -5 -10  -4   58.51    4.09
  -5  10  -5   -3.10    4.43
  -5 -10  -5    1.71    2.26
  -5  10  -6   13.95    4.03
  -5 -10  -6   13.05    2.24
  -5  10  -7    0.56    3.18
  -5 -10  -7    2.62    1.49
  -5  11  10   13.86    2.23
   5 -11 -10    8.17    1.87
   5 -11  -9    8.64    2.16
   5 -11  -8   30.30    2.89
   5 -11  -7   16.21    2.85
   5 -11  -6    0.01    2.72
   5 -11  -5   37.28    3.66
  -5 -11   5   36.93    3.84
   5 -11  -4    8.54    3.10
  -5 -11   4    0.72    3.45
   5 -11  -3   85.88    5.14
  -5 -11   3   86.05    5.32
   5 -11  -2    7.63    3.37
  -5 -11   2   21.40    3.69
  -5 -11   1   87.41    5.32
  -5  11   0   -1.23    3.55
  -5 -11   0   -3.57    3.16
  -5  11  -1   51.59    4.70
  -5  11  -2    2.64    3.65
  -5  11  -3    3.21    3.48
  -5 -11  -3    7.62    2.47
  -5  11  -4    5.72    3.39
  -5 -11  -4    5.24    2.11
  -5  11  -5    1.09    2.92
  -5 -11  -5    0.91    1.75
  -5  11  -6   -1.08    2.38
  -5  12   8   29.59    2.52
  -5  12   7    1.67    2.25
  -5  12   6   59.85    3.75
  -5  12   5    5.32    2.40
  -5 -12   5    4.65    2.45
  -5 -12   4   23.21    2.91
  -5  12   4   26.19    2.83
  -5 -12   3    2.34    2.67
  -5 -12   2  103.29    5.02
   5 -12  -2   78.45    5.38
  -5 -12   1   -1.86    2.72
  -5 -12   0   71.50    4.12
  -5  12  -1    0.28    2.45
  -5  12  -2   17.51    2.63
  -5  12  -3    2.86    2.36
  -5 -12  -3    0.17    1.57
  -5 -12  -4   44.98    2.52
  -5 -13   2    1.64    1.62
  -5 -13   1   20.21    1.99
  -5 -13   0    1.40    1.43
   6   0 -17   -1.11    2.33
   6   0 -16   -0.16    3.26
   6   0 -15   -5.05    4.16
   6   0 -15   -3.51    2.48
   6   0 -14   38.38    4.18
   6   0 -14   54.33    5.38
   6   0 -13   39.23    4.42
   6   0 -12  151.57    8.08
   6   0 -11   25.51    5.20
   6   0 -10  223.33   10.78
   6   0  -9    8.19    4.13
   6   0  -8  352.37   15.46
   6   0  -8  359.12   15.10
   6   0  -7   -1.82    3.46
   6   0  -6  727.92   29.17
   6   0  -5   -3.76    3.51
   6   0  -5   -3.19    2.89
   6   0  -4  648.73   24.76
  -6   0   4  485.57   27.60
   6   0  -3   -2.48    2.51
   6   0  -1   -4.47   11.38
  -6   0   1    0.44    2.28
   6   0   0    2.34   10.86
  -6   0   0    0.33    2.46
   6   0   0    2.10    2.60
  -6   0  -1   -0.96    2.79
   6   0   1    1.00    2.73
  -6   0  -2  245.98   10.77
   6   0   2  241.33   10.70
  -6   0  -3    0.81    5.53
   6   0   3    2.86    3.44
   6   0   4  297.01   12.72
  -6   0  -4  271.54   13.66
  -6   0  -5   -0.81    5.99
  -6   0  -5   -1.13    4.45
   6   0   5    1.25    3.91
  -6   0  -6   64.95    5.81
  -6   0  -6   56.13    6.84
  -6   0  -7   -2.44    5.36
  -6   0  -7   -3.01    4.66
  -6   0  -8  270.70   14.27
  -6   0  -8  372.26   14.79
  -6   0  -9    0.87    4.79
  -6   0  -9    0.90    4.08
  -6   0 -10  108.37    6.58
  -6   0 -11    0.39    3.12
  -6   0 -12    5.50    2.17
   6  -1 -17    3.37    2.73
   6   1 -16   -2.53    2.49
   6  -1 -16   -2.00    3.51
   6  -1 -16   -0.17    1.99
   6   1 -15   11.63    3.89
   6  -1 -15   18.16    4.43
   6  -1 -15   13.33    3.30
   6   1 -14    8.84    4.28
   6  -1 -14   18.27    4.83
   6  -1 -14   14.27    3.79
   6  -1 -13  149.47    8.03
   6   1 -13  146.21    8.49
   6   1 -12   26.57    4.36
   6  -1 -12   47.42    4.93
   6  -1 -11  340.64   14.76
   6   1 -11  358.47   15.55
   6   1 -11  313.78   15.11
   6   1 -10   82.03    6.08
   6  -1 -10   90.48    6.33
   6   1  -9  422.75   18.42
   6  -1  -9  446.70   18.47
   6   1  -8    0.72    4.01
   6  -1  -7 1615.61   58.86
   6   1  -7 1395.01   58.71
   6  -1  -6    0.82    3.23
   6  -1  -6   -0.49    3.51
   6   1  -6    1.88    2.96
   6  -1  -5 2148.37   89.43
   6  -1  -5 2420.42   89.34
   6   1  -5 2326.42   89.15
  -6  -1   5 2040.74   94.04
  -6  -1   4   51.47   10.04
   6  -1  -4   54.88    3.90
   6   1  -4   54.09    3.72
  -6   1   4   42.86    6.64
  -6   1   3 1676.76   76.74
   6  -1  -3 1911.08   73.32
   6   1  -3 1884.89   73.23
  -6   1   2   19.17    5.07
   6  -1  -2   18.88   11.88
  -6  -1   2   44.42    3.08
   6   1  -2   33.21    3.12
   6   1  -2   21.97    6.88
  -6   1   1  175.08    7.66
  -6  -1   1  168.06    7.60
   6   1  -1  186.07   12.60
   6  -1  -1  170.60    7.77
   6  -1  -1  153.99   16.57
  -6   1   0  160.57    7.15
  -6  -1   0  153.76    7.11
   6   1   0  133.54   11.53
   6  -1   0  163.30   16.81
   6  -1   0  146.64    7.20
  -6   1  -1  248.80   10.88
  -6  -1  -1  250.77   10.84
   6   1   1  265.61   15.85
   6  -1   1  260.10   10.94
  -6  -1  -1  239.95   11.86
  -6   1  -2   30.06    3.91
  -6  -1  -2   31.56    3.78
   6  -1   2   27.34    3.70
  -6  -1  -2   37.13    5.70
   6  -1   3  469.27   19.44
  -6   1  -4    1.82    5.86
  -6  -1  -4    2.18    4.19
   6  -1   4    3.11    3.76
  -6   1  -5  349.03   15.92
  -6   1  -5  327.68   16.30
  -6   1  -6   96.23    7.28
  -6  -1  -6  104.78    6.78
   6   1   6  100.25    6.24
  -6   1  -6   85.96    7.79
  -6  -1  -6   98.10    7.83
  -6   1  -7   -2.80    5.42
  -6  -1  -7   -1.12    5.17
  -6   1  -7   -0.62    4.77
  -6  -1  -7   -0.82    4.08
  -6  -1  -8  165.58    8.58
  -6  -1  -8  178.81    9.06
  -6   1  -9   85.10    6.18
  -6  -1  -9   78.86    5.78
  -6  -1 -10  204.90    8.90
  -6  -1 -10  205.64    8.97
  -6   1 -11   26.70    3.70
  -6  -1 -11   30.13    3.46
   6  -2 -17   14.72    2.97
   6  -2 -16    8.11    3.68
   6  -2 -16    5.26    2.77
   6   2 -15    1.45    3.13
   6  -2 -15    5.18    4.22
   6  -2 -15    3.68    3.66
   6  -2 -14   31.42    4.31
   6   2 -14   27.35    4.33
   6  -2 -13  139.09    7.64
   6   2 -13  123.01    7.63
   6  -2 -12  150.44    7.93
   6  -2 -12  184.96    8.86
   6  -2 -11  158.93    8.09
   6  -2 -10   86.49    5.84
   6   2 -10   94.55    6.16
   6   2  -9    2.02    3.77
   6   2  -8   84.31    5.69
   6  -2  -7   -0.63    3.73
   6   2  -7   -2.04    3.38
   6  -2  -6  256.33   12.42
   6   2  -6  280.78   12.13
   6  -2  -5   29.94    3.99
   6  -2  -5   34.26    3.86
   6   2  -5   23.86    3.17
  -6  -2   5   18.87    9.88
   6  -2  -4  168.93    8.48
   6  -2  -4  166.07    8.04
   6   2  -4  164.94    7.57
   6   2  -3  757.56   27.94
  -6  -2   3  808.65   36.21
  -6   2   2   66.42    4.20
  -6  -2   2   77.70    4.02
  -6   2   2   63.86    7.56
   6  -2  -2   37.00   12.22
   6  -2  -2   62.18    4.45
  -6  -2   2   89.18   12.50
  -6   2   2   44.12    6.79
  -6   2   1  127.82    6.18
  -6  -2   1  121.84    5.87
  -6   2   1  135.59   10.18
   6  -2  -1  126.70    6.24
  -6   2   1   88.39    8.11
   6  -2  -1   94.49   13.90
  -6   2   0   46.84    3.82
  -6  -2   0   33.82    3.39
   6  -2   0   34.83   11.44
   6  -2   0   38.80    3.71
  -6   2  -1  417.16   16.51
  -6  -2  -1  382.26   16.22
   6  -2   1  392.54   16.42
  -6  -2  -1  384.78   17.14
  -6   2  -2  257.57   11.68
  -6  -2  -2  261.93   11.43
   6  -2   2  260.85   11.56
  -6  -2  -2  264.49   12.53
   6  -2   3   53.94    4.86
  -6  -2  -3   58.72    6.26
  -6  -2  -4  276.57   12.70
  -6  -2  -4  311.54   13.69
  -6   2  -5    4.07    5.44
  -6  -2  -5    0.88    4.18
  -6  -2  -6   52.88    5.12
  -6  -2  -6   58.10    8.04
  -6   2  -6   39.30    6.09
  -6  -2  -7  287.29   11.93
   6   2   7  261.06   11.57
  -6   2  -8   65.87    6.24
  -6  -2  -8   78.85    5.26
  -6   2  -9  151.54    9.30
  -6  -2  -9  180.02    8.92
  -6   2 -10    1.64    4.08
  -6  -2 -10    6.88    4.08
  -6  -2 -10    6.92    3.24
  -6   2 -11   83.94    5.77
  -6  -2 -11  113.81    5.45
   6  -3 -16   23.21    3.14
   6  -3 -15    0.90    3.55
   6  -3 -14   45.28    4.73
   6  -3 -13   18.68    4.44
   6  -3 -13   14.97    3.51
   6   3 -13   21.47    4.28
   6  -3 -12   89.12    5.69
   6  -3 -12  101.55    6.64
   6   3 -12  101.92    6.51
   6  -3 -11    7.53    3.92
   6  -3 -10   -3.05    4.18
   6  -3 -10   -4.46    3.77
   6   3 -10    4.23    4.07
   6  -3 -10    4.04    4.22
   6  -3  -9   17.25    3.56
   6   3  -9   16.10    4.06
   6  -3  -9   17.25    4.12
   6   3  -8   -3.73    3.65
   6  -3  -8   -7.47    4.04
   6  -3  -7    1.80    3.62
   6   3  -7    0.73    3.39
   6  -3  -6    0.05    4.25
   6  -3  -5   -1.20    3.57
   6  -3  -5   -0.88    3.41
   6  -3  -4  177.27    8.90
   6   3  -4  178.75    8.16
   6  -3  -3   62.45    7.33
  -6  -3   3  232.56    7.36
  -6   3   2   27.98    3.34
  -6  -3   2   27.73    3.24
   6  -3  -2   24.98    3.81
  -6   3   1  136.72    6.36
   6  -3  -1   99.87   13.76
  -6  -3   1  116.89    6.07
  -6   3   1   88.92    8.65
   6  -3  -1  126.71    6.58
  -6   3   0  452.21   17.00
  -6   3   0  447.35   17.13
  -6  -3   0  360.66   16.80
   6  -3   0  389.65   17.15
  -6   3  -1   53.63    4.58
  -6   3  -1   47.08    4.70
  -6  -3  -1   43.28    4.10
   6  -3   1   43.66    4.63
  -6  -3  -1   43.29    5.91
  -6   3  -2  351.14   15.28
  -6   3  -2  383.70   15.61
  -6  -3  -2  346.04   14.94
   6  -3   2  321.09   15.38
  -6  -3  -2  376.80   15.96
  -6   3  -3    5.82    4.49
  -6  -3  -3    8.00    5.45
   6  -3   3    5.04    4.34
  -6  -3  -4 1136.56   42.53
  -6  -3  -4 1089.25   42.04
  -6  -3  -5  487.97   18.73
  -6   3  -5  400.32   18.57
  -6   3  -5  361.59   18.58
  -6  -3  -5  450.45   18.01
  -6  -3  -6  452.92   16.97
  -6  -3  -6  389.20   16.23
  -6  -3  -7   40.58    4.52
  -6  -3  -7   41.84    5.69
  -6  -3  -8  386.89   16.40
  -6   3  -9    2.99    4.75
  -6  -3  -9    5.93    3.54
  -6   3 -10  120.09    7.45
  -6  -3 -10  141.74    6.55
  -6  -3 -11    1.96    2.34
   6  -4 -16    3.34    2.99
   6  -4 -16    4.32    2.71
   6  -4 -15    9.21    3.75
   6  -4 -15   13.19    3.53
   6  -4 -14   59.28    4.83
   6  -4 -14   65.75    5.11
   6  -4 -13    1.33    3.48
   6  -4 -13    9.80    4.66
   6  -4 -13    4.95    4.44
   6  -4 -12   21.93    3.84
   6  -4 -11   12.93    4.00
   6  -4 -11    2.71    3.57
   6  -4 -10    0.75    4.03
   6  -4 -10    4.87    3.66
   6  -4 -10    4.25    3.97
   6  -4  -9   -3.88    4.16
   6  -4  -9   -2.99    4.32
   6  -4  -8   83.11    5.47
   6  -4  -7   17.62    3.71
   6  -4  -6  199.86    9.41
   6  -4  -5    4.72    3.94
   6   4  -5    0.82    2.91
   6  -4  -4    8.55    4.27
  -6  -4   4    8.15    3.12
  -6  -4   3  203.28    8.10
   6  -4  -3  132.27    8.28
  -6  -4   2  209.93   10.87
   6  -4  -2  331.92   11.89
  -6   4   1  103.52    6.06
  -6  -4   1  107.23    6.15
   6  -4  -1  120.20    6.75
  -6   4   0  123.76    6.46
  -6   4   0  118.22    6.55
  -6  -4   0  101.22    6.18
   6  -4   0  112.65    7.04
  -6   4  -1  350.97   14.62
  -6  -4  -1  329.66   14.32
   6  -4   1  320.03   14.81
  -6   4  -1  363.23   14.57
  -6  -4  -1  308.72   15.19
  -6   4  -2  126.14    7.18
  -6   4  -2  124.36    7.37
  -6  -4  -2  134.89    8.02
  -6   4  -3  977.69   40.95
  -6  -4  -3 1076.54   41.17
  -6   4  -4  155.94    9.30
  -6  -4  -4  169.37    8.62
  -6  -4  -4  181.57    9.61
  -6  -4  -5  270.62   12.15
  -6  -4  -5  247.94   11.33
  -6   4  -6   -2.88    5.40
  -6  -4  -6   10.69    5.16
  -6  -4  -6    2.51    3.63
  -6  -4  -7   29.41    3.98
  -6  -4  -7   32.58    5.21
  -6  -4  -8   17.64    4.62
  -6  -4  -8   13.62    3.66
  -6   4  -9   26.60    5.08
  -6  -4  -9   34.81    3.79
  -6  -4  -9   34.74    4.42
  -6  -4 -10   11.02    3.39
  -6   4 -11    6.23    2.91
  -6  -4 -11    5.68    2.09
   6  -5 -16   22.24    2.68
   6  -5 -16   25.82    2.92
   6  -5 -15   85.93    5.17
   6  -5 -15   89.31    5.36
   6  -5 -14   36.41    4.29
   6  -5 -14   28.12    3.39
   6  -5 -13   87.13    5.70
   6  -5 -13   67.24    4.98
   6  -5 -12   80.67    5.74
   6  -5 -12   66.86    5.13
   6  -5 -11   22.41    3.98
   6  -5 -11   22.06    3.64
   6  -5 -10   -1.26    3.82
   6  -5 -10   -4.03    3.72
   6  -5  -9  129.53    6.94
   6  -5  -9  112.85    6.60
   6  -5  -9  120.45    6.79
   6  -5  -8   -0.44    3.75
   6  -5  -8    2.05    3.68
   6  -5  -7  174.99    8.47
   6  -5  -6   35.72    3.99
   6  -5  -5   80.15    5.27
  -6  -5   4    2.93    3.77
  -6  -5   3  173.19    8.39
   6  -5  -2  228.50    9.48
  -6  -5   2  141.94    8.23
   6  -5  -1  290.42   13.08
  -6  -5   1  273.40   12.23
  -6   5   0   40.26    4.92
   6  -5   0   47.61    5.82
  -6  -5   0   32.62    4.33
   6  -5   1  523.92   21.18
  -6  -5  -1  468.99   20.09
  -6   5  -1  487.52   20.44
  -6   5  -2   80.31    6.58
   6  -5   2   88.56    7.59
  -6  -5  -2   91.54    7.33
  -6   5  -3   63.05    6.37
   6  -5   3   60.26    7.30
  -6  -5  -3   65.13    6.53
  -6   5  -4    2.98    5.85
   6  -5   4    7.51    6.36
  -6  -5  -4    0.90    5.42
  -6  -5  -4    4.34    4.25
  -6   5  -5   28.44    5.89
   6  -5   5   18.52    5.91
  -6  -5  -5   33.21    4.25
  -6  -5  -5   38.84    5.13
  -6   5  -6  171.40    9.81
   6  -5   6  154.96    9.64
  -6  -5  -6  168.87    8.33
  -6  -5  -6  178.39    8.99
  -6  -5  -7    4.62    4.35
  -6  -5  -7    2.30    3.29
  -6  -5  -8  116.08    6.39
  -6  -5  -8  127.19    6.87
  -6  -5  -9   12.64    3.63
  -6  -5  -9    7.03    2.75
  -6   5 -10   67.05    5.11
  -6   5 -11    4.66    2.45
   6  -6 -15    4.80    2.70
   6  -6 -14   88.15    4.91
   6  -6 -14   66.32    4.42
   6  -6 -13   12.66    3.34
   6  -6 -13   13.83    3.68
   6  -6 -13   13.63    3.78
   6  -6 -12  144.89    7.43
   6  -6 -12  137.72    7.39
   6  -6 -12  123.41    7.02
   6  -6 -11   -1.43    4.20
   6  -6 -11    1.76    3.76
   6  -6 -11   -2.91    3.60
   6  -6 -11   -0.14    3.94
   6  -6 -10  116.39    6.69
   6  -6 -10  106.43    6.53
   6  -6 -10  130.48    6.99
   6  -6  -9    2.72    3.60
   6  -6  -8  336.27   14.36
   6  -6  -8  341.68   14.51
   6  -6  -7   62.93    5.20
   6  -6  -7   58.70    4.63
   6  -6  -6  180.96    8.55
   6  -6  -5    8.43    3.32
  -6  -6   5    2.87    3.83
  -6  -6   4  188.82    9.15
   6  -6  -3   72.18    7.28
  -6  -6   3  168.73    7.13
   6  -6  -2  657.23   24.81
  -6  -6   2  553.15   24.05
  -6   6   1  167.63    8.81
   6  -6  -1  172.36    9.08
  -6  -6   1  158.45    8.44
   6  -6   0  515.59   20.49
  -6  -6   0  447.54   19.65
   6  -6   1    6.92    5.17
  -6  -6  -1   -5.04    4.26
   6  -6   2  386.18   17.46
   6  -6   3   16.31    5.37
  -6  -6  -3   21.19    5.25
   6  -6   4  650.17   28.33
  -6  -6  -4  706.53   27.56
  -6  -6  -4  675.60   28.04
   6  -6   5    2.82    4.52
  -6  -6  -5    1.68    3.52
  -6  -6  -6  445.94   18.44
  -6  -6  -6  439.83   18.73
  -6  -6  -7   21.97    4.30
  -6  -6  -7   18.11    3.36
  -6  -6  -8   79.41    4.90
  -6  -6  -8   93.84    5.51
  -6   6  -9    0.37    3.99
  -6  -6  -9   -2.17    2.20
  -6   6 -10    7.88    3.06
   6  -7 -15   11.54    2.01
   6  -7 -14    3.36    2.24
   6  -7 -14    4.59    2.82
   6  -7 -13   48.92    3.95
   6  -7 -13   53.20    4.05
   6  -7 -12   -6.11    3.42
   6  -7 -12   -6.64    3.26
   6  -7 -12   -2.76    3.47
   6  -7 -11   69.12    5.08
   6  -7 -11   59.79    4.86
   6  -7 -11   65.94    4.99
   6  -7 -10    3.53    3.80
   6  -7 -10    0.17    3.57
   6  -7 -10    3.12    3.45
   6  -7  -9  133.14    7.27
   6  -7  -9  146.96    7.50
   6  -7  -8   -0.60    3.88
   6  -7  -8    0.75    3.62
   6  -7  -7  214.35    9.93
   6  -7  -7  201.07    9.58
   6  -7  -6    2.61    4.07
   6  -7  -5  145.29    7.95
  -6  -7   5  166.60    8.08
   6  -7  -4   13.54    4.12
  -6  -7   4   19.27    4.29
  -6  -7   3  249.79   11.41
  -6  -7   2   49.97    5.10
  -6   7   1  710.44   29.91
  -6  -7   1  754.76   29.70
  -6   7   0   13.40    5.10
   6  -7   0   17.93    5.14
  -6  -7   0   14.04    4.31
  -6   7  -1   11.42    5.00
   6  -7   1   11.84    4.86
  -6  -7  -1   13.34    4.03
  -6   7  -2   23.64    5.42
   6  -7   2   22.92    4.99
  -6   7  -3   29.35    5.53
   6  -7   3   27.76    4.76
  -6   7  -4    7.95    5.34
   6  -7   4    4.86    4.34
  -6  -7  -4    5.60    3.58
  -6   7  -5   73.58    6.98
  -6  -7  -5   84.35    5.22
  -6   7  -6   -1.30    5.21
  -6  -7  -6    1.46    3.13
  -6   7  -7   60.36    5.76
  -6  -7  -7   43.32    3.71
  -6  -7  -8   73.68    4.12
   6  -8 -14   10.88    1.81
   6  -8 -14   11.93    1.92
  -6   8  13    9.47    2.45
   6  -8 -13    5.52    2.62
   6  -8 -12    3.86    2.95
   6  -8 -12    7.27    3.06
   6  -8 -11   -4.36    3.28
   6  -8 -10   32.93    3.98
   6  -8 -10   39.43    4.11
   6  -8  -9   -1.73    3.58
   6  -8  -9   -2.55    3.93
   6  -8  -9   -1.50    3.74
   6  -8  -8  145.52    7.62
   6  -8  -8  139.86    7.58
   6  -8  -8  153.13    7.52
   6  -8  -7    5.55    3.37
   6  -8  -7   -2.16    3.88
   6  -8  -6    4.54    3.91
   6  -8  -5    1.47    3.63
   6  -8  -5   -1.40    3.63
  -6  -8   5   -3.02    3.54
   6  -8  -4   32.81    4.23
  -6  -8   4   32.73    4.23
   6  -8  -3   25.73    4.07
  -6  -8   3   33.59    4.19
   6  -8  -2  168.04    8.98
  -6  -8   2  214.68    9.24
  -6   8   1   -7.37    4.61
  -6   8   0  362.93   15.96
  -6  -8   0  356.36   15.38
  -6   8  -1   47.22    5.51
  -6  -8  -1   47.62    4.55
  -6   8  -2   16.23    5.13
  -6   8  -3   15.87    5.00
  -6   8  -4    1.58    4.87
  -6  -8  -4   -5.37    3.30
  -6   8  -5   21.02    5.13
  -6  -8  -5   16.34    3.17
  -6   8  -6   22.79    4.81
  -6  -8  -6   21.79    3.03
  -6   8  -7   65.44    5.13
  -6  -8  -7   39.93    3.18
  -6  -8  -8   -0.52    1.68
   6  -9 -13    2.89    1.60
   6  -9 -12    7.20    2.44
  -6   9  12   22.78    2.87
   6  -9 -11    2.54    2.32
   6  -9 -10   -4.52    3.31
   6  -9 -10   -0.91    2.65
   6  -9  -9   61.12    4.49
   6  -9  -9   56.68    4.10
   6  -9  -9   69.33    4.71
   6  -9  -7  156.73    7.87
   6  -9  -6   -2.07    3.75
   6  -9  -6   -0.07    3.76
   6  -9  -5   29.48    4.06
   6  -9  -5   28.89    4.02
  -6  -9   5   30.97    4.04
   6  -9  -4   -0.59    3.56
   6  -9  -4   -0.35    3.43
  -6  -9   4    3.51    3.62
   6  -9  -3   72.50    5.15
   6  -9  -3   74.38    5.16
  -6  -9   3   88.59    5.38
  -6  -9   2    3.44    3.63
  -6   9   1   58.05    5.28
  -6  -9   1   68.29    4.94
  -6   9   0    2.53    4.53
  -6  -9   0    5.24    3.58
  -6   9  -1    5.90    4.66
  -6  -9  -1    6.12    3.50
  -6   9  -2  210.86   10.64
  -6   9  -3   -0.37    4.57
  -6   9  -4   56.55    5.50
  -6  -9  -4   49.40    3.71
  -6   9  -5    9.67    4.30
  -6  -9  -5    7.22    2.56
  -6   9  -6   60.23    5.10
  -6  -9  -6   63.65    3.60
  -6   9  -7   -1.54    3.24
  -6  -9  -7   -0.39    1.54
  -6   9  -8   30.63    2.96
  -6  10  11   -0.02    2.21
   6 -10 -11    0.19    2.04
   6 -10 -10    5.67    2.55
   6 -10  -9   18.81    3.10
   6 -10  -8    5.55    3.09
   6 -10  -7   13.64    3.35
   6 -10  -7    5.03    3.27
   6 -10  -6    1.05    3.36
   6 -10  -6    3.54    3.37
   6 -10  -5    2.49    3.32
   6 -10  -5    0.12    3.38
  -6 -10   5    2.42    3.21
   6 -10  -4   36.35    4.14
  -6 -10   4   38.14    3.97
   6 -10  -3   59.61    4.52
  -6 -10   3   56.83    4.56
   6 -10  -2   37.45    4.09
  -6 -10   2   45.15    4.13
   6 -10  -1   42.06    4.09
  -6 -10   1   52.99    4.18
  -6  10   0   15.42    4.09
   6 -10   0    9.76    3.22
  -6 -10   0   13.98    3.29
  -6  10  -1   22.61    4.30
  -6 -10  -1   24.09    3.34
  -6  10  -2   44.06    4.78
  -6  10  -3  113.20    6.85
  -6 -10  -3  117.07    5.66
  -6  10  -4    2.25    3.70
  -6 -10  -4   -0.06    2.22
  -6  10  -5   75.03    4.93
  -6 -10  -5   71.53    3.79
  -6  10  -6   -1.57    2.69
  -6 -10  -6   -0.28    1.48
   6 -11  -9    3.97    1.95
   6 -11  -8   -2.40    2.27
   6 -11  -7    8.74    2.33
   6 -11  -6    6.79    2.75
   6 -11  -5   34.06    3.32
  -6 -11   5   32.81    3.03
   6 -11  -4    4.85    2.86
  -6 -11   4    5.82    2.70
   6 -11  -3   26.31    3.22
  -6 -11   3   28.52    3.21
   6 -11  -2    0.64    2.64
  -6 -11   2    4.26    2.70
  -6 -11   1   19.85    2.91
  -6 -11   0    3.12    2.47
  -6 -11  -1    7.65    2.40
  -6  11  -2   10.25    2.72
  -6  11  -3   42.39    3.35
  -6 -11  -3   44.68    2.83
  -6  11  -4    6.65    2.30
  -6 -11  -4    6.72    1.69
  -6  12   6   30.29    2.55
  -6  12   5   -3.11    2.16
  -6 -12   4   48.42    2.91
  -6 -12   3    3.09    1.93
  -6 -12   2   51.07    3.12
  -6 -12   0   65.15    3.51
  -6 -12  -1    1.39    1.49
   7   0 -17   -0.48    2.17
   7   0 -16    9.06    2.97
   7   0 -15    3.40    3.59
   7   0 -14   48.04    4.73
   7   0 -14    9.92    2.74
   7   0 -13   23.76    3.50
   7   0 -12   47.64    4.43
   7   0 -11   16.86    4.42
   7   0 -10   20.34    4.60
   7   0  -9   10.55    4.46
   7   0  -8  352.31   15.89
   7   0  -8  364.62   15.58
   7   0  -7   -3.85    4.37
   7   0  -6 1413.88   55.83
   7   0  -5   -5.81    4.82
   7   0  -5   -6.80    3.97
   7   0  -4 1784.20   69.95
   7   0  -3    0.02    3.39
  -7   0   2  482.10   19.50
  -7   0   1   -0.29    3.27
   7   0  -1   -3.70    3.47
  -7   0   0  377.16   15.12
   7   0   0  338.98   15.25
  -7   0  -1    3.84    3.79
   7   0   1    0.28    3.64
  -7   0  -2  152.82    7.83
   7   0   2  144.77    7.77
   7   0   3   -1.71    4.01
   7   0   4   90.99    6.16
  -7   0  -5    1.10    4.60
   7   0   5   -1.09    3.70
  -7   0  -6  278.55   13.12
  -7   0  -7   -1.98    4.53
  -7   0  -8   -4.09    4.39
  -7   0  -9   -1.67    3.65
  -7   0  -9    0.98    3.50
  -7   0 -10   17.99    3.40
  -7   0 -11    0.91    2.09
   7  -1 -17    2.57    2.48
   7   1 -16    1.28    1.92
   7  -1 -16    5.78    3.26
   7   1 -15   10.72    3.01
   7  -1 -15   19.42    3.07
   7   1 -14   -5.40    3.55
   7  -1 -14    3.76    4.39
   7  -1 -14    1.87    3.39
   7  -1 -13  104.99    6.53
   7   1 -12   -2.71    2.97
   7  -1 -12    1.56    3.80
   7  -1 -11  129.18    6.81
   7  -1 -11  143.71    7.70
   7  -1 -10   39.05    4.95
   7   1 -10   26.70    4.33
   7  -1  -9  204.20    9.44
   7   1  -9  154.15    8.94
   7   1  -8    3.30    4.07
   7  -1  -8    6.56    4.37
   7   1  -8    0.16    4.28
   7  -1  -7  629.45   24.71
   7   1  -7  654.67   24.69
   7  -1  -6    0.42    4.17
   7  -1  -6    0.10    4.19
   7   1  -6   -2.10    3.95
   7  -1  -5  668.70   28.85
   7  -1  -5  743.99   28.63
   7   1  -5  698.59   28.42
   7  -1  -4   51.87    4.73
   7   1  -4   46.76    4.30
  -7  -1   3  503.06   20.57
   7   1  -3  531.84   21.10
  -7  -1   2   84.19    4.85
   7   1  -2   74.48    5.24
  -7   1   1   60.66    4.34
  -7  -1   1   58.41    4.24
   7  -1  -1   53.63    4.63
  -7  -1   0  485.98   19.90
   7  -1   0  478.23   20.20
   7   1   0  450.51   20.11
  -7   1  -1  186.97    9.07
  -7  -1  -1  180.36    8.83
   7  -1   1  199.29    9.15
   7   1   1  194.19    9.07
  -7   1  -2  428.96   17.83
  -7  -1  -2  421.25   17.62
   7  -1   2  410.33   17.79
   7   1   2  420.64   17.71
   7  -1   3   86.00    6.09
   7   1   3   89.34    6.01
   7  -1   4  140.78    8.16
   7   1   4  159.00    8.15
  -7   1  -5   17.70    5.38
  -7  -1  -5   16.13    4.51
   7   1   5   15.07    3.92
  -7   1  -6   47.42    5.86
  -7  -1  -6   54.22    5.19
   7   1   6   45.47    4.43
  -7   1  -7   -1.15    4.86
  -7  -1  -7   -1.23    4.54
  -7   1  -8   73.25    6.05
  -7  -1  -8   91.45    5.98
  -7   1  -9    3.59    3.83
  -7  -1  -9   -0.82    3.55
  -7  -1  -9    1.06    3.42
  -7   1 -10   43.75    4.08
  -7  -1 -10   51.16    3.92
  -7  -1 -11    4.10    1.98
   7  -2 -17   -1.62    2.47
   7  -2 -16    5.92    3.25
   7  -2 -16    3.53    2.54
   7   2 -15    1.77    2.09
   7  -2 -15    5.25    4.02
   7  -2 -15    1.12    3.29
   7  -2 -14   30.70    4.20
   7   2 -14    9.36    3.17
   7  -2 -13    2.12    4.08
   7   2 -13   -0.71    3.38
   7  -2 -12   62.19    4.80
   7  -2 -12   74.89    5.66
   7  -2 -11    4.57    3.66
   7   2 -11    6.37    3.25
   7   2 -10   50.91    4.60
   7   2  -9    8.72    3.62
   7   2  -8   20.54    3.80
   7  -2  -7   75.94    5.93
   7  -2  -7   74.52    5.81
   7   2  -7   73.45    5.48
   7  -2  -6  342.08   14.53
   7   2  -6  347.77   14.23
   7  -2  -5  152.55    8.80
   7  -2  -5  179.06    8.65
   7   2  -5  161.91    8.17
   7  -2  -4  161.41    9.35
   7  -2  -4  177.35    8.97
   7   2  -4  174.80    8.41
  -7  -2   3   86.95    4.70
   7   2  -3   61.18    5.13
   7  -2  -2    7.41    4.23
   7   2  -2    4.86    3.50
  -7   2   1  531.81   20.74
  -7  -2   1  479.32   20.40
   7  -2  -1  508.08   20.94
  -7   2   0   41.99    4.62
  -7  -2   0   36.50    4.10
   7  -2   0   32.94    4.68
  -7   2  -1  647.40   24.62
  -7  -2  -1  579.89   24.20
   7  -2   1  574.81   24.61
  -7   2  -2   23.27    5.14
  -7  -2  -2   19.07    4.10
   7  -2   2   16.63    4.75
  -7   2  -3  666.37   26.17
   7  -2   3  579.63   25.91
  -7  -2  -3  648.58   26.56
  -7  -2  -4    1.35    6.18
   7  -2   4    3.85    4.60
  -7   2  -5   10.89    5.40
  -7  -2  -5   10.97    4.24
   7   2   5    9.56    3.69
  -7   2  -6    6.56    5.32
  -7   2  -6   10.05    5.36
  -7  -2  -6    3.69    4.06
   7   2   6   10.21    3.49
  -7   2  -7  126.77    8.44
  -7  -2  -7  163.59    7.95
  -7  -2  -8   13.89    4.02
  -7   2  -9  188.74    9.54
  -7  -2  -9  206.02    9.16
  -7   2 -10   -4.18    3.19
  -7  -2 -10    0.94    2.61
   7  -3 -16   -0.74    2.55
   7  -3 -15    0.82    3.48
   7  -3 -14   -2.35    3.81
   7  -3 -13   20.71    3.71
   7   3 -13   11.47    3.58
   7  -3 -12   13.75    4.40
   7  -3 -12   11.47    3.67
   7  -3 -11    0.56    3.88
   7  -3 -11    1.63    4.20
   7  -3 -10    7.77    4.02
   7  -3 -10    5.19    3.29
   7   3 -10    7.92    3.36
   7  -3 -10   10.50    4.34
   7   3  -9   -2.54    3.18
   7  -3  -9    0.87    4.26
   7  -3  -8   70.74    5.23
   7   3  -8   16.61    3.52
   7  -3  -7   -1.09    4.22
   7   3  -7   -0.99    2.45
   7  -3  -6  119.51    7.67
   7  -3  -6  132.49    7.70
   7   3  -6  137.49    7.08
   7  -3  -5   16.27    4.75
   7  -3  -5   23.35    4.55
   7   3  -5   17.40    3.82
   7  -3  -4 1211.15   48.64
   7   3  -4 1224.71   48.21
   7  -3  -3   51.91    6.15
  -7  -3   3   73.72    4.54
   7  -3  -3   49.93    5.57
   7   3  -3   72.86    4.86
  -7   3   2  711.62   25.91
   7  -3  -2  655.76   26.35
  -7   3   1   11.52    4.24
  -7  -3   1   -1.53    3.60
   7  -3  -1    8.27    4.56
  -7   3   0 1672.54   61.75
  -7   3   0 1771.75   62.01
   7  -3   0 1564.46   62.13
  -7   3  -1    0.54    4.24
  -7   3  -1   -2.42    4.73
  -7  -3  -1    0.42    3.85
   7  -3   1    0.94    4.84
  -7   3  -2 1089.35   41.93
  -7   3  -2 1159.99   42.23
  -7  -3  -2 1064.72   41.66
  -7   3  -3   63.81    5.91
  -7   3  -3   64.60    6.53
   7  -3   3   49.35    6.00
  -7  -3  -3   68.94    7.13
  -7   3  -4  183.38    9.77
  -7  -3  -4  194.92   10.47
  -7   3  -5    1.17    4.78
  -7  -3  -5    3.60    5.39
  -7  -3  -5    4.77    3.89
  -7   3  -6  377.68   16.85
  -7  -3  -6  424.61   16.27
   7   3   6  386.89   16.12
  -7  -3  -6  396.24   16.79
  -7  -3  -7   -4.58    4.95
  -7  -3  -7    4.23    3.64
   7   3   7    6.51    3.25
  -7  -3  -8  290.27   12.67
  -7  -3  -9   -1.87    3.03
  -7  -3 -10  158.25    7.22
   7  -4 -16    6.98    2.84
   7  -4 -16    2.58    2.47
   7  -4 -15   14.11    3.57
   7  -4 -15   11.84    3.34
   7  -4 -14    4.30    2.68
   7  -4 -14    7.30    3.96
   7  -4 -14    2.86    3.64
   7  -4 -13    7.64    4.28
   7  -4 -13    2.97    3.60
   7  -4 -13    5.88    4.58
   7  -4 -12    6.80    3.63
   7  -4 -11    2.47    3.89
   7  -4 -11   -2.37    3.59
   7  -4 -10   28.27    4.30
   7  -4 -10   20.84    3.71
   7  -4 -10   29.26    4.32
   7  -4  -9    5.31    3.65
   7  -4  -9    5.93    3.98
   7  -4  -8   62.44    5.34
   7  -4  -7   41.72    4.75
   7   4  -7   16.64    3.72
   7  -4  -6  101.87    6.53
   7   4  -6  104.83    6.10
   7  -4  -5  159.11    9.19
   7   4  -5  185.33    8.69
   7  -4  -4   37.37    5.56
  -7  -4   4   49.07    4.17
   7   4  -4   46.57    4.54
   7  -4  -3  421.70   17.69
  -7  -4   3  403.76   16.64
   7  -4  -3  377.72   17.32
  -7  -4   2   63.13    4.80
   7  -4  -2   59.07    5.82
  -7  -4   1   34.56    4.18
   7  -4  -1   36.38    5.23
  -7  -4   0  170.20    8.72
   7  -4   0  170.65    9.82
  -7   4  -1    3.37    4.60
  -7  -4  -1    4.82    4.00
   7  -4   1    5.95    5.03
  -7   4  -2  135.30    8.09
  -7   4  -2  145.27    8.43
  -7  -4  -2  150.36    7.50
  -7   4  -3   58.68    5.89
  -7   4  -4  106.47    7.30
  -7  -4  -4  102.18    7.50
  -7   4  -5   99.81    7.38
  -7  -4  -5  104.73    6.30
  -7  -4  -5  115.37    7.40
  -7   4  -6    2.72    5.46
  -7  -4  -6   11.03    4.94
  -7  -4  -6    5.35    3.68
  -7   4  -7  228.08   11.17
  -7  -4  -7  236.17   10.22
   7   4   7  219.52   10.11
  -7  -4  -7  244.36   10.73
  -7  -4  -8   -1.19    3.07
  -7  -4  -9  159.06    7.22
  -7   4 -10    6.89    2.76
  -7  -4 -10    6.11    2.06
   7  -5 -16    1.15    1.95
   7  -5 -15   35.91    3.59
   7  -5 -15   41.01    3.67
   7  -5 -14    1.39    2.53
   7  -5 -14    3.15    3.50
   7  -5 -13  132.27    6.82
   7  -5 -13   99.92    6.17
   7  -5 -12    0.86    3.55
   7  -5 -11   41.80    4.52
   7  -5 -11   38.75    4.21
   7  -5 -10   50.81    4.91
   7  -5 -10   49.26    4.48
   7  -5  -9  145.74    7.33
   7  -5  -9  133.45    7.14
   7  -5  -8    4.45    3.56
   7  -5  -7  200.23    9.69
   7  -5  -6   38.81    4.70
   7  -5  -5   40.71    4.65
   7   5  -5   35.02    4.34
   7  -5  -4   -0.09    5.11
  -7  -5   4    0.88    3.46
   7   5  -4    1.01    3.60
  -7  -5   3   76.29    5.26
  -7  -5   2  173.27    8.46
   7  -5  -1  118.19    8.12
  -7  -5   1  111.86    6.53
   7  -5   0  469.02   18.57
  -7  -5   0  373.51   16.92
  -7   5  -1   95.46    6.87
   7  -5   1  108.97    8.32
  -7  -5  -1   98.73    6.11
  -7   5  -2 1155.63   45.11
   7  -5   2 1157.11   45.80
  -7  -5  -2 1091.33   44.58
  -7   5  -3  157.30    8.83
   7  -5   3  157.75    9.75
  -7   5  -4 1248.71   50.22
   7  -5   4 1266.76   50.77
  -7   5  -5   40.97    5.91
   7  -5   5   48.94    6.49
  -7  -5  -5   51.08    4.43
  -7   5  -6  297.91   14.24
   7  -5   6  271.69   14.21
  -7  -5  -7   16.11    3.26
   7   5   7    8.94    3.02
  -7  -5  -8  192.20    7.60
   7   5   8  145.68    7.22
  -7  -5  -9   14.73    2.20
  -7   5 -10    6.75    2.20
   7  -6 -15   -0.20    2.35
   7  -6 -14  137.32    6.01
   7  -6 -14   99.70    5.49
   7  -6 -13    3.07    3.06
   7  -6 -13    3.70    3.39
   7  -6 -13   -0.20    3.34
   7  -6 -12  152.75    7.63
   7  -6 -12  145.62    7.60
   7  -6 -12  134.76    7.25
   7  -6 -11    0.94    4.07
   7  -6 -11   -3.72    3.77
   7  -6 -11   -1.12    3.49
   7  -6 -10  228.67   10.39
   7  -6 -10  248.11   10.65
   7  -6  -9    2.96    3.62
   7  -6  -8  167.10    8.47
   7  -6  -8  184.82    8.52
   7  -6  -7   57.47    5.14
   7  -6  -7   60.85    4.53
   7  -6  -6   20.22    3.76
   7  -6  -5   17.48    3.72
   7   6  -5   17.27    3.71
   7  -6  -4  178.13    8.99
  -7  -6   4  182.83    8.71
  -7  -6   3   42.19    4.65
   7  -6  -2  830.49   31.45
  -7  -6   2  721.40   30.42
   7  -6  -1  128.41    8.08
  -7  -6   1  102.82    6.58
   7  -6   0  618.34   23.98
  -7  -6   0  526.82   22.77
   7  -6   1   87.26    7.23
  -7  -6  -1  108.28    6.14
   7  -6   2  170.71    9.68
  -7  -6  -2  170.55    8.27
   7  -6   3   11.74    5.21
   7  -6   4   29.23    5.32
   7  -6   5   58.19    5.82
  -7  -6  -5   62.94    4.50
  -7  -6  -6    1.50    2.96
  -7   6  -7    0.51    4.32
  -7  -6  -7    3.22    2.73
  -7  -6  -8   39.62    3.04
   7   6   8   37.60    2.58
   7  -7 -14    0.30    1.89
   7  -7 -14    1.76    2.38
   7  -7 -13   47.14    3.86
   7  -7 -13   42.86    3.58
   7  -7 -12    1.07    3.05
   7  -7 -12   -0.09    2.97
   7  -7 -12   -0.10    3.28
   7  -7 -11   85.94    5.58
   7  -7 -11  112.95    6.08
   7  -7 -11   90.38    5.74
   7  -7 -11  105.75    5.87
   7  -7 -10   12.96    3.91
   7  -7 -10   11.70    3.72
   7  -7 -10   14.75    3.59
   7  -7  -9  175.48    9.19
   7  -7  -9  211.48    9.43
   7  -7  -8   53.67    5.02
   7  -7  -8   49.31    4.55
   7  -7  -7    7.87    4.23
   7  -7  -7    6.64    3.91
   7  -7  -6    9.56    4.01
   7  -7  -5    5.86    3.83
  -7  -7   5    7.05    3.27
  -7  -7   4   40.54    4.01
  -7  -7   3   61.09    4.71
  -7  -7   2   98.25    5.83
  -7  -7   1  335.10   14.32
  -7   7   0    3.50    4.28
   7  -7   0    6.27    4.89
  -7  -7   0    7.48    3.64
  -7   7  -1   48.03    5.36
   7  -7   1   50.41    5.77
  -7  -7  -1   53.15    4.57
  -7   7  -2   26.23    5.16
   7  -7   2   26.40    5.27
  -7  -7  -2   24.99    3.82
  -7   7  -3   12.80    4.87
   7  -7   3    8.79    4.71
  -7   7  -4   -0.03    4.82
  -7  -7  -4    0.32    3.14
  -7   7  -5   15.37    4.98
  -7  -7  -5   10.90    2.91
  -7   7  -6    9.29    4.25
  -7  -7  -6    8.97    2.61
  -7   7  -7   13.88    3.68
  -7  -7  -7   15.34    2.43
   7   7   7   17.15    2.38
  -7   7  -8    4.07    2.89
  -7  -7  -8    5.96    1.79
   7  -8 -13   -1.90    2.27
   7  -8 -13    8.35    2.27
   7  -8 -12    1.41    2.69
   7  -8 -12    1.68    2.64
   7  -8 -11    1.77    2.89
   7  -8 -10   27.02    3.66
   7  -8 -10   33.63    3.79
   7  -8  -9   57.22    4.67
   7  -8  -9   70.52    4.79
   7  -8  -9   57.81    4.82
   7  -8  -8  115.61    6.66
   7  -8  -8  112.10    6.57
   7  -8  -8  120.97    6.51
   7  -8  -7   56.86    4.95
   7  -8  -7   59.89    4.60
   7  -8  -6   33.32    4.38
   7  -8  -5   30.72    4.31
  -7  -8   5   35.50    3.72
   7  -8  -4   56.80    4.96
  -7  -8   4   56.76    4.48
   7  -8  -3    8.33    3.81
  -7  -8   3   14.30    3.50
   7  -8  -2  144.66    8.03
  -7  -8   2  179.18    8.00
  -7  -8   1    0.61    3.34
  -7   8   0    6.13    4.22
  -7  -8   0    4.60    3.48
  -7   8  -1  195.33   10.20
  -7  -8  -1  218.44    9.57
  -7   8  -2    7.71    4.50
  -7   8  -3   89.09    6.29
  -7   8  -4    1.38    4.13
  -7  -8  -4   -2.31    2.79
  -7   8  -5   96.30    6.16
  -7  -8  -5   94.83    4.85
  -7   8  -6    1.60    3.46
  -7  -8  -6   -0.37    1.99
  -7  -8  -7   60.14    3.32
   7   8   7   67.27    3.43
   7  -9 -10   10.22    3.03
   7  -9 -10    7.43    2.43
   7  -9  -9   31.54    3.55
   7  -9  -9   38.64    3.74
   7  -9  -8    2.01    3.40
   7  -9  -7   13.92    3.68
   7  -9  -6   37.26    4.17
   7  -9  -5    6.92    3.63
   7  -9  -5    8.75    3.53
  -7  -9   5    5.79    2.96
   7  -9  -4   39.07    4.20
   7  -9  -4   39.20    4.16
  -7  -9   4   38.30    3.84
   7  -9  -3   50.90    4.21
  -7  -9   3   35.49    3.85
  -7  -9   2  135.72    6.86
  -7  -9   1    0.12    3.10
  -7  -9   0   29.37    3.53
  -7   9  -1   33.22    4.54
  -7  -9  -1   35.11    3.47
  -7   9  -2   60.28    5.21
  -7   9  -3    4.18    3.92
  -7   9  -4   55.87    4.81
  -7  -9  -4   53.61    3.53
  -7   9  -5    3.00    3.18
  -7  -9  -5    3.41    1.82
  -7   9  -6   45.01    3.54
  -7  -9  -6   38.86    2.43
   7   9   6   39.91    2.51
   7 -10 -11    5.20    1.69
   7 -10 -10    2.46    2.25
   7 -10  -9   21.40    2.84
   7 -10  -8   -3.28    2.63
   7 -10  -7   23.29    3.11
   7 -10  -6    2.29    2.82
   7 -10  -6    6.35    3.16
   7 -10  -5   72.33    4.46
   7 -10  -5   48.60    3.96
   7 -10  -4    2.76    3.42
  -7 -10   4   -1.10    2.75
   7 -10  -3  130.51    6.65
  -7 -10   3  132.42    6.49
   7 -10  -2   15.31    3.37
  -7 -10   2    3.64    2.83
   7 -10  -1   48.34    4.25
  -7 -10   1   87.03    4.33
   7 -10   0   -0.48    2.78
  -7 -10   0    2.80    2.54
  -7 -10  -1   66.97    3.86
  -7  10  -2   10.61    2.75
  -7  10  -3   14.53    2.74
  -7  10  -4   -0.21    2.27
  -7 -10  -4    1.70    1.55
   7 -11  -6    1.19    2.31
   7 -11  -5    7.58    2.53
   7 -11  -4   16.87    2.62
  -7 -11   4   16.41    2.02
   7 -11  -3    8.23    2.52
  -7 -11   3    2.36    1.93
   7 -11  -2   29.59    2.96
  -7 -11   2   32.49    2.64
  -7 -11   1    3.26    1.99
  -7 -11   0   34.00    2.40
   7  11   0   23.47    2.03
  -7 -11  -1    1.48    1.70
   7  11   1   -1.14    1.42
   7  11   2   23.10    1.84
   8   0 -16   10.36    2.93
   8   0 -15    0.44    3.36
   8   0 -14   41.18    4.35
   8   0 -14    2.46    2.29
   8   0 -13    0.31    2.79
   8   0 -12   12.20    3.35
   8   0 -12   28.59    4.20
   8   0 -11    0.17    3.77
   8   0 -10   41.74    4.82
   8   0  -9   -0.74    4.38
   8   0  -8  518.79   22.74
   8   0  -8  548.23   22.47
   8   0  -7    5.94    4.95
   8   0  -6  225.64   11.76
   8   0  -6  257.00   11.86
   8   0  -5   22.51    6.16
   8   0  -5   38.23    5.80
   8   0  -4  335.42   14.89
  -8   0   3    0.07    3.60
   8   0  -3    3.63    4.35
  -8   0   2   13.54    3.79
  -8   0   1   -1.18    3.76
   8   0  -1   -0.45    4.27
  -8   0   0    7.57    4.16
   8   0   0    5.26    4.18
  -8   0  -1   -0.02    4.32
   8   0   1   -0.14    4.36
  -8   0  -2   24.47    4.85
   8   0   2   21.90    4.60
  -8   0  -3   -0.45    4.46
   8   0   3   -1.81    3.92
   8   0   4  110.21    6.75
   8   0   5    0.28    3.85
  -8   0  -6  153.88    8.54
  -8   0  -7    1.14    4.03
  -8   0  -8   24.48    3.69
   8   1 -16    3.33    2.35
   8  -1 -16   15.56    3.19
   8   1 -15    2.83    2.76
   8  -1 -15   18.71    2.93
   8   1 -14   -0.69    2.99
   8  -1 -14    1.33    4.08
   8  -1 -14    1.70    3.21
   8  -1 -13    9.72    3.72
   8   1 -12   -3.50    2.16
   8  -1 -12   -1.91    3.75
   8  -1 -12    1.96    4.02
   8   1 -11   -3.73    3.48
   8  -1 -11   -3.70    4.36
   8   1 -10    0.52    3.32
   8  -1 -10   -4.14    4.27
   8  -1  -9   -0.41    4.83
   8   1  -9   -3.41    3.96
   8   1  -8   14.34    4.64
   8  -1  -8   24.54    5.32
   8   1  -8   22.29    5.12
   8  -1  -7  100.95    7.06
   8  -1  -7  117.54    7.47
   8   1  -7  119.84    7.58
   8  -1  -6  319.79   15.45
   8  -1  -6  368.23   15.68
   8   1  -6  353.32   15.42
   8  -1  -5  101.52    7.68
   8  -1  -5  117.43    7.21
   8   1  -5   99.88    6.81
   8  -1  -4  134.52    8.91
   8  -1  -4  140.85    7.96
   8   1  -4  134.74    7.57
  -8  -1   3   10.35    3.43
   8   1  -3   10.85    4.06
  -8  -1   2  325.54   14.22
   8  -1  -2  298.27   14.82
  -8   1   1   -0.50    4.23
  -8  -1   1   -4.13    3.88
   8  -1  -1   -3.08    4.54
  -8  -1   0  511.18   21.30
   8  -1   0  496.93   21.83
   8   1   0  466.68   21.63
  -8   1  -1   20.43    5.05
  -8  -1  -1   18.49    4.47
   8  -1   1   18.07    4.92
   8   1   1   12.89    4.66
  -8   1  -2  261.33   11.78
  -8  -1  -2  246.64   11.25
   8   1   2  243.87   11.35
  -8   1  -3    8.02    5.07
  -8  -1  -3    6.04    4.37
   8  -1   3    1.27    4.26
   8   1   3    3.57    3.87
   8  -1   4   44.14    5.19
   8   1   4   49.07    4.71
   8   1   5  144.01    7.65
  -8   1  -6    0.64    4.54
  -8   1  -6   -0.61    4.59
  -8  -1  -6    2.37    4.31
  -8   1  -7   55.49    5.05
  -8   1  -7   51.62    5.14
  -8  -1  -7   55.57    4.95
  -8  -1  -8    5.62    3.43
  -8  -1  -9   30.92    3.25
   8  -2 -16   12.45    2.38
   8  -2 -16   10.01    3.14
   8  -2 -15   42.45    3.60
   8  -2 -15   61.15    4.42
   8  -2 -14   64.34    4.50
   8   2 -14   -2.74    2.39
   8  -2 -13   42.01    4.82
   8  -2 -12    7.84    4.15
   8  -2 -12    7.31    3.60
   8  -2 -11    8.26    3.59
   8   2 -11   -0.74    2.26
   8   2 -10   -1.13    2.44
   8   2  -9    3.67    2.87
   8   2  -8   -0.04    3.41
   8   2  -8   -3.57    4.47
   8  -2  -7    5.86    4.97
   8   2  -7   -4.92    4.92
   8  -2  -6    0.25    5.03
   8  -2  -6    1.76    4.81
   8   2  -6    1.71    4.36
   8  -2  -5  558.05   24.91
   8  -2  -5  636.18   24.96
   8   2  -5  584.90   24.41
   8  -2  -4    1.07    5.86
   8   2  -4    6.58    4.08
  -8  -2   3  300.34   13.59
   8   2  -3  326.59   14.29
  -8   2   2    3.14    4.45
  -8  -2   2   -3.61    3.54
   8  -2  -2    0.59    5.06
   8   2  -2   -2.07    4.10
  -8  -2   1  461.57   20.10
   8  -2  -1  491.86   21.02
  -8   2   0   22.30    4.39
  -8   2   0   20.99    5.09
  -8  -2   0   14.33    4.05
   8  -2   0   16.78    5.48
  -8   2  -1  844.03   31.75
  -8  -2  -1  748.20   31.18
   8  -2   1  741.23   31.82
   8   2   1  787.12   31.58
  -8   2  -2   14.90    4.59
  -8   2  -2   14.09    5.34
  -8  -2  -2   12.89    4.22
   8  -2   2    9.83    4.97
   8   2   2   11.22    4.05
  -8   2  -3  204.87    9.76
  -8   2  -3  202.00   10.13
  -8  -2  -3  205.05    9.46
   8   2   3  198.85    9.48
  -8   2  -4    1.95    4.65
   8   2   4    5.72    3.89
  -8   2  -5   83.08    6.22
   8   2   5   83.80    5.63
  -8   2  -6   21.90    4.76
  -8   2  -6   17.94    4.88
  -8  -2  -6    1.89    3.88
   8   2   6    3.23    3.34
  -8   2  -7  109.18    7.04
  -8  -2  -7  133.91    6.84
  -8  -2  -8   -0.74    3.06
  -8  -2  -9   54.40    3.58
   8  -3 -16   13.26    2.43
   8  -3 -15   -5.38    3.28
   8  -3 -14   43.39    4.42
   8  -3 -13    5.23    4.25
   8  -3 -13   12.68    3.46
   8  -3 -12   69.15    5.29
   8  -3 -12   83.42    6.09
   8  -3 -11   -5.71    4.37
   8  -3 -10  150.51    6.00
   8   3 -10    7.06    2.69
   8   3  -9   -1.37    2.20
   8  -3  -9   -0.74    4.21
   8  -3  -8  247.75    7.29
   8   3  -8   -0.22    2.67
   8  -3  -7  115.04    6.44
   8   3  -7  113.69    5.90
   8  -3  -6  207.50   11.16
   8  -3  -6  221.92   11.25
   8   3  -6  230.50   10.67
   8  -3  -5  217.89   11.95
   8   3  -5  260.24   11.33
   8  -3  -4  350.56   17.10
   8   3  -4  393.33   16.31
   8  -3  -3    2.44    6.31
  -8  -3   3   31.46    4.11
   8  -3  -3    6.01    5.94
   8   3  -3   24.72    4.74
   8  -3  -2  661.96   26.15
  -8  -3   2  609.79   24.44
   8  -3  -2  599.43   25.47
  -8   3   1  121.46    7.29
  -8  -3   1  110.37    6.56
   8  -3  -1  106.19    8.11
   8   3  -1  113.31    7.06
  -8   3   0  501.98   19.96
  -8   3   0  531.67   20.35
  -8  -3   0  440.11   19.62
   8  -3   0  437.01   20.62
  -8   3  -1  183.80    9.21
  -8   3  -1  206.27    9.86
  -8  -3  -1  185.45    8.85
   8  -3   1  159.29    9.92
   8   3   1  181.20    9.19
  -8   3  -2  684.37   28.33
  -8   3  -2  750.51   28.72
  -8  -3  -2  679.93   28.01
   8  -3   2  622.55   28.68
   8   3   2  730.42   28.30
  -8   3  -3    3.19    4.34
  -8   3  -3    6.20    5.08
  -8  -3  -3    0.38    3.84
   8  -3   3    1.30    4.57
   8   3   3    2.99    3.67
  -8   3  -4   11.59    4.71
   8   3   4   12.57    3.84
  -8   3  -5   13.06    4.70
  -8  -3  -5   17.13    4.03
   8   3   5   13.22    3.61
  -8   3  -6  109.47    7.24
  -8  -3  -6  129.13    6.58
   8   3   6  115.09    6.40
  -8   3  -7    0.28    3.95
   8  -3   7    3.90    4.66
  -8  -3  -7    6.34    3.43
  -8  -3  -8  181.46    8.19
  -8  -3  -9    4.03    2.10
   8  -4 -16    5.41    2.28
   8  -4 -15    8.09    3.20
   8  -4 -15   -4.64    3.21
   8  -4 -14    4.88    2.51
   8  -4 -14    6.50    3.59
   8  -4 -14    4.41    3.35
   8  -4 -13   -4.54    4.11
   8  -4 -13   -1.84    3.48
   8  -4 -12   -7.25    4.59
   8  -4 -12    0.02    3.68
   8  -4 -11  178.94    8.81
   8  -4 -10    1.61    3.88
   8  -4 -10    0.73    3.36
   8  -4 -10   -0.72    3.85
   8  -4  -9   78.07    5.35
   8  -4  -9  100.34    6.13
   8   4  -8    3.85    3.15
   8  -4  -8    6.96    4.03
   8  -4  -7   71.58    5.44
   8   4  -7   25.15    4.17
   8  -4  -6    1.11    4.70
   8   4  -6    5.18    3.91
   8  -4  -5    7.20    5.15
   8   4  -5    8.32    4.08
   8  -4  -4  172.63   10.10
   8  -4  -4  180.97   10.22
   8   4  -4  184.53    9.19
   8  -4  -3   59.43    6.94
  -8  -4   3   57.17    4.64
   8  -4  -3   54.03    6.22
   8   4  -3   55.54    5.37
  -8  -4   2   22.27    4.00
   8  -4  -2   19.22    5.84
   8   4  -2   12.63    4.33
  -8  -4   1   21.16    4.00
   8  -4  -1   23.59    5.20
  -8   4   0   93.81    6.25
  -8  -4   0   84.92    5.68
   8  -4   0   74.40    6.79
  -8   4  -1  210.52   10.49
   8  -4   1  265.95   12.41
  -8  -4  -1  235.51   10.17
   8  -4   1  179.61   10.82
  -8   4  -2   14.47    4.48
   8  -4   2   12.59    6.42
  -8  -4  -2   21.05    3.81
   8  -4   2   13.19    4.65
  -8   4  -3  198.60    9.97
   8  -4   3  193.97   11.47
  -8   4  -4    2.05    4.56
   8  -4   4    1.94    6.06
   8   4   4    4.54    3.48
  -8   4  -5  164.60    9.42
  -8  -4  -5  188.77    8.85
   8  -4   5  180.31   10.46
   8   4   5  190.21    8.83
  -8   4  -6    4.11    4.35
   8  -4   6    8.73    5.15
  -8  -4  -6    2.59    3.15
   8   4   6    6.39    3.02
  -8   4  -7  109.56    6.75
   8   4   7  101.63    5.58
  -8  -4  -8   11.10    2.44
  -8  -4  -9   82.71    4.06
   8  -5 -15   15.29    2.70
   8  -5 -15   12.71    2.68
   8  -5 -14    3.58    2.20
   8  -5 -14    4.65    3.24
   8  -5 -13   58.27    4.56
   8  -5 -13   38.37    4.02
   8  -5 -12   25.24    3.80
   8  -5 -11   78.80    5.38
   8  -5 -11   61.46    4.94
   8  -5 -10  127.38    6.85
   8  -5 -10  115.25    6.61
   8  -5  -9   -0.98    4.28
   8  -5  -9    0.57    3.61
   8  -5  -9    4.24    3.69
   8  -5  -8   77.06    5.40
   8  -5  -7    9.56    3.77
   8  -5  -6  416.36   16.98
   8   5  -6  371.79   16.56
   8  -5  -5   -1.93    4.17
   8   5  -5   -1.28    3.70
   8  -5  -4  792.94   32.05
  -8  -5   4  750.12   30.88
   8   5  -4  801.94   31.39
  -8  -5   3  113.13    5.76
   8   5  -3   65.63    5.96
  -8  -5   2  217.23    9.94
   8  -5  -1   -1.25    5.82
  -8  -5   1   -5.50    3.77
   8  -5   0  368.09   15.29
  -8  -5   0  285.34   13.25
   8  -5   1   41.99    6.38
  -8  -5  -1   46.02    4.35
  -8   5  -2   77.64    6.18
   8  -5   2   81.85    7.59
  -8  -5  -2   84.17    5.47
  -8   5  -3   12.46    4.78
   8  -5   3   15.56    5.66
   8  -5   4  286.23   13.84
   8  -5   5   15.53    5.21
  -8  -5  -5   14.39    3.29
   8   5   5   14.33    3.21
  -8  -5  -6  171.23    7.94
   8   5   6  175.33    7.96
  -8  -5  -7   54.75    3.46
   8   5   7   41.77    2.98
  -8   5  -8   55.14    4.43
  -8  -5  -8   84.25    3.86
   8  -6 -14   43.50    3.14
   8  -6 -14   31.53    2.75
   8  -6 -13    5.62    2.76
   8  -6 -13    7.16    3.03
   8  -6 -13    7.33    3.09
   8  -6 -12   72.34    5.08
   8  -6 -12   68.53    4.77
   8  -6 -11    2.59    3.80
   8  -6 -11    1.07    3.44
   8  -6 -11    3.62    3.31
   8  -6 -10  180.33    8.69
   8  -6 -10  165.98    8.37
   8  -6  -9   15.89    3.79
   8  -6  -8  118.70    6.91
   8  -6  -8  142.56    7.02
   8  -6  -7    5.38    3.24
   8  -6  -6   22.52    3.83
   8  -6  -5    9.09    3.44
   8   6  -5    6.37    3.44
  -8  -6   4    6.34    3.22
   8   6  -4    3.66    3.62
   8  -6  -3   61.92    4.88
  -8  -6   3   59.92    4.47
   8   6  -3   67.65    4.98
   8  -6  -2   37.63    6.17
  -8  -6   2   21.44    3.57
   8  -6  -1  113.78    7.73
  -8  -6   1  104.49    5.90
   8  -6   0  278.03   12.65
  -8  -6   0  233.67   10.98
  -8   6  -1    0.82    4.24
   8  -6   1   -0.73    4.97
  -8  -6  -1   -1.66    3.41
   8  -6   2   14.02    5.60
  -8  -6  -2    4.69    3.64
   8  -6   3   50.42    5.82
   8  -6   4   -1.19    4.52
  -8   6  -5   31.13    4.54
  -8  -6  -5   34.76    3.29
   8   6   5   38.74    3.36
  -8  -6  -6   95.01    4.84
   8   6   6   99.57    4.89
  -8   6  -7   42.58    3.83
  -8  -6  -7   43.67    2.99
   8   6   7   38.70    2.55
   8  -7 -14    0.80    1.86
   8  -7 -13   11.77    2.52
   8  -7 -13   20.29    2.83
   8  -7 -12    0.34    2.70
   8  -7 -12    2.80    2.94
   8  -7 -11   33.19    3.56
   8  -7 -11   38.04    3.98
   8  -7 -10    3.19    3.58
   8  -7 -10    1.25    3.37
   8  -7 -10   -0.83    2.97
   8  -7  -9   70.35    5.52
   8  -7  -9  106.21    5.78
   8  -7  -8   46.79    4.67
   8  -7  -8   36.52    4.19
   8  -7  -7    0.24    4.00
   8  -7  -7   -1.10    3.71
   8  -7  -6   52.59    4.87
   8  -7  -5    1.80    3.83
  -8  -7   4   84.32    4.96
   8   7  -4   89.03    5.53
  -8  -7   3   15.96    3.23
   8   7  -3   17.43    3.58
  -8  -7   2   47.67    4.00
  -8  -7   1   11.37    3.14
  -8  -7   0    4.60    3.14
  -8   7  -1   18.67    4.22
  -8  -7  -1   23.10    3.49
  -8   7  -2   13.51    4.26
  -8  -7  -2    7.66    3.13
  -8   7  -3    0.65    3.98
  -8   7  -4    2.83    3.82
  -8   7  -5   13.53    3.62
  -8  -7  -5   15.96    2.45
   8   7   5   19.92    2.58
  -8   7  -6   13.72    3.05
  -8  -7  -6   13.28    2.09
   8   7   6   14.28    2.02
   8  -8 -12    7.32    2.30
   8  -8 -12   11.19    2.30
   8  -8 -11    8.53    2.49
   8  -8 -10   66.20    4.36
   8  -8 -10   73.74    4.46
   8  -8  -9   52.97    4.38
   8  -8  -9   62.03    4.32
   8  -8  -9   57.81    4.43
   8  -8  -7  167.34    8.20
   8  -8  -7  165.97    8.03
   8  -8  -5  139.43    7.43
   8  -8  -4   -1.68    3.87
  -8  -8   4   -5.93    2.97
   8   8  -4   -1.84    2.98
  -8  -8   3  154.58    7.34
   8   8  -3  171.19    7.74
  -8  -8   2   56.45    4.08
   8   8  -2   59.13    4.33
  -8  -8   1   28.45    3.27
  -8  -8   0    0.79    2.88
  -8  -8  -1   94.22    5.12
  -8   8  -2   11.98    3.59
  -8  -8  -2   13.19    2.88
  -8   8  -3   76.93    5.03
  -8   8  -4    7.09    3.04
  -8   8  -5   48.77    3.70
  -8  -8  -5   41.82    2.80
   8   8   5   46.53    2.86
   8  -9 -11    4.03    2.05
   8  -9 -10   62.12    3.89
   8  -9  -9    0.08    2.80
   8  -9  -9    1.89    2.60
   8  -9  -8   66.61    4.35
   8  -9  -8   67.47    4.42
   8  -9  -7   13.02    3.23
   8  -9  -6   85.39    5.19
   8  -9  -5   -0.93    3.13
   8  -9  -5    0.94    3.21
  -8  -9   4   56.35    3.59
   8  -9  -4   47.93    4.02
   8  -9  -3   38.83    4.02
  -8  -9   3   42.85    3.42
  -8  -9   2   39.35    3.35
   8   9  -2   46.71    3.65
  -8  -9   1   -2.28    2.52
   8   9  -1   -2.32    2.66
  -8  -9   0  154.86    7.24
   8   9   0  166.38    7.41
  -8  -9  -1    2.52    2.24
   8   9   1    3.49    2.28
  -8  -9  -2   38.07    2.86
   8   9   2   37.76    2.91
   8   9   3   -0.13    1.81
   8 -10  -9   19.51    2.29
   8 -10  -8   -0.90    2.26
   8 -10  -7   19.34    2.47
   8 -10  -6    0.40    2.66
   8 -10  -5   27.77    3.15
   8 -10  -4    9.66    2.86
   8 -10  -3   78.31    4.74
  -8 -10   3   87.10    4.21
   8 -10  -2    5.09    2.72
  -8 -10   2   -1.02    2.04
  -8 -10   1   75.32    3.78
   8  10  -1   75.07    3.71
  -8 -10   0   -0.82    1.88
   8  10   0   -0.47    1.66
  -8 -10  -1   49.82    2.88
   8  10   1   45.68    2.88
   8  10   2   -0.50    1.44
   8 -11  -5   -1.00    1.87
   8 -11  -4   50.64    3.06
   9   0 -15    0.48    3.05
   9   0 -14   28.88    4.27
   9   0 -13   -2.01    3.06
   9   0 -12    9.99    3.46
   9   0 -12    6.03    3.78
   9   0 -11   -0.80    3.94
   9   0 -10   98.03    6.77
   9   0  -9    0.15    4.35
   9   0  -8    4.25    4.73
   9   0  -8    0.03    4.35
   9   0  -7    1.18    4.92
   9   0  -6   18.25    4.91
   9   0  -6   21.80    5.44
   9   0  -5    6.06    5.64
   9   0  -5    0.66    5.07
   9   0  -4   19.40    5.28
  -9   0   3   -6.00    4.10
  -9   0   2   80.46    5.73
  -9   0   1   -4.45    4.20
   9   0  -1   -0.76    4.96
  -9   0   0  739.38   27.27
   9   0   0  578.91   27.45
  -9   0  -1   -0.47    4.32
   9   0   1    0.06    4.38
  -9   0  -2   80.65    6.13
   9   0   2   70.84    6.05
  -9   0  -3    1.43    4.57
   9   0   3    3.11    4.14
   9   0   4  106.42    6.75
  -9   0  -5    2.47    3.79
  -9   0  -6  106.50    5.96
  -9   0  -6   99.36    6.15
  -9   0  -7    1.16    2.88
  -9   0  -8   16.17    2.51
   9  -1 -16   13.72    2.74
   9   1 -15    8.58    2.72
   9  -1 -15   24.15    3.54
   9  -1 -14   46.58    4.01
   9   1 -14   33.65    4.12
   9  -1 -13   -5.40    3.72
   9  -1 -12   44.63    4.09
   9  -1 -12   66.23    5.17
   9   1 -11   -2.39    3.91
   9  -1 -11    5.59    4.47
   9   1 -10   35.36    4.62
   9  -1 -10   61.18    5.52
   9  -1  -9   -3.03    4.80
   9   1  -8    8.91    4.59
   9  -1  -8    4.17    4.54
   9   1  -8    7.67    4.41
   9  -1  -7   81.80    6.13
   9  -1  -7   74.53    6.44
   9   1  -7   71.53    6.52
   9  -1  -6  100.64    7.28
   9  -1  -6  105.29    7.73
   9   1  -6  104.12    7.28
   9  -1  -5   17.11    5.76
   9   1  -5   25.35    5.99
   9  -1  -5   21.16    5.57
   9   1  -5   26.77    5.43
   9  -1  -4  141.36    9.41
   9  -1  -4  137.24    8.94
   9   1  -4  148.54    8.51
  -9  -1   3  124.24    6.73
   9   1  -3  125.88    7.66
  -9   1   2  106.91    6.53
  -9  -1   2   92.62    6.01
   9  -1  -2   92.17    7.48
  -9   1   1  231.08   10.53
  -9  -1   1  210.84   10.09
   9  -1  -1  212.72   11.08
   9  -1   0  177.46   10.59
   9   1   0  181.99   10.23
  -9   1  -1  301.39   12.88
  -9  -1  -1  276.04   12.40
   9   1   1  286.72   12.75
  -9   1  -2   -0.90    4.67
  -9  -1  -2   -0.27    4.09
   9  -1   2    4.35    4.64
   9   1   2    0.17    3.94
  -9   1  -3  352.12   14.52
  -9   1  -3  330.81   14.81
  -9  -1  -3  344.21   14.60
   9  -1   3  296.86   14.66
   9   1   3  316.89   14.46
  -9   1  -4   12.04    4.18
  -9   1  -4   10.10    4.71
   9  -1   4    8.28    4.56
   9   1   4    9.57    4.00
  -9   1  -5  200.42    9.00
   9   1   5  164.74    8.71
  -9   1  -6   -1.64    3.46
  -9  -1  -6    0.44    3.30
  -9   1  -6    3.03    3.52
  -9  -1  -6    1.10    3.48
  -9   1  -7   75.81    5.00
  -9  -1  -7   82.14    4.93
  -9   1  -8   12.51    2.48
   9  -2 -16    1.59    2.36
   9  -2 -15   24.78    3.13
   9  -2 -15   36.88    3.74
   9   2 -14    0.19    2.62
   9  -2 -14    5.90    3.32
   9  -2 -13  115.15    6.64
   9  -2 -12   -1.36    3.54
   9  -2 -11   66.58    4.50
   9   2 -11   12.23    3.35
   9   2 -10    6.64    3.30
   9   2  -9   50.04    4.76
   9   2  -8    5.36    4.21
   9   2  -8    5.96    4.46
   9  -2  -7  209.56   10.79
   9  -2  -7  194.20   10.57
   9   2  -7  208.79   10.40
   9  -2  -6  175.58    9.81
   9   2  -6  181.78    9.60
   9  -2  -5   76.75    7.05
   9  -2  -5   92.18    7.50
   9   2  -5   88.35    6.43
   9  -2  -4   78.60    7.29
   9   2  -4   74.92    6.13
  -9  -2   3  245.49   11.12
   9  -2  -3  270.79   13.26
   9   2  -3  256.39   11.92
  -9   2   2   -6.69    4.41
  -9  -2   2   -4.97    3.71
   9  -2  -2   -3.39    5.61
   9   2  -2   -3.83    4.51
  -9   2   1  337.24   14.20
  -9  -2   1  308.82   13.70
   9  -2  -1  311.61   14.99
  -9   2   0   28.19    4.04
  -9   2   0   35.96    4.97
  -9  -2   0   27.51    4.13
   9  -2   0   21.37    5.48
   9   2   0   26.19    4.67
  -9   2  -1  532.53   22.36
  -9   2  -1  593.60   22.86
  -9  -2  -1  531.15   22.34
   9  -2   1  511.61   23.11
   9   2   1  555.78   22.71
  -9   2  -2   -1.25    4.39
  -9   2  -2    5.20    5.23
  -9  -2  -2    4.82    4.18
   9  -2   2   -0.65    4.97
   9   2   2    0.80    4.05
  -9   2  -3   56.18    5.07
  -9   2  -3   59.63    5.82
  -9  -2  -3   52.04    4.88
   9  -2   3   50.15    5.65
   9   2   3   57.41    4.91
  -9   2  -4    5.62    4.33
  -9   2  -4   10.32    4.77
   9   2   4    9.21    3.60
  -9   2  -5    2.93    3.88
   9   2   5   -0.71    3.40
  -9   2  -6    3.50    3.37
  -9  -2  -6    1.69    3.19
  -9   2  -7    8.51    3.03
  -9  -2  -7   11.16    2.77
   9  -2   7    6.42    3.54
  -9  -2  -7   10.23    2.84
   9  -3 -15    0.25    2.46
   9  -3 -14   53.97    4.34
   9  -3 -13    1.35    3.64
   9  -3 -13    0.94    2.84
   9  -3 -12   95.58    5.95
   9  -3 -12  109.53    6.56
   9  -3 -11   -2.39    3.82
   9   3 -11    0.70    2.99
   9  -3 -11   -0.26    4.10
   9   3 -10   43.46    4.89
   9  -3 -10  169.87    6.86
   9   3  -9    2.54    3.26
   9  -3  -9    4.38    4.27
   9  -3  -8  229.31    8.77
   9   3  -8   83.52    7.08
   9  -3  -7   28.94    5.16
   9   3  -7   14.72    4.38
   9   3  -7   27.08    4.52
   9  -3  -6  310.97   15.34
   9   3  -6  353.88   15.02
   9  -3  -5  138.00    8.88
   9   3  -5  165.33    8.45
   9  -3  -4   -3.36    5.67
   9   3  -4   -0.03    4.06
   9  -3  -3   16.12    5.95
  -9  -3   3    8.26    3.39
   9  -3  -3    4.70    5.58
   9   3  -3   13.25    4.47
   9  -3  -2   80.38    8.64
  -9  -3   2   90.61    5.11
   9  -3  -2   81.58    7.59
   9  -3  -1   -5.38    5.54
  -9  -3   0  185.88    8.80
   9  -3   0  184.67   10.35
  -9   3  -1    1.85    3.85
  -9  -3  -1    3.92    3.61
   9  -3   1    2.42    4.92
   9   3   1    0.08    4.05
  -9   3  -2  160.14    8.53
  -9  -3  -2  176.57    8.30
   9   3   2  179.41    8.63
  -9   3  -3    1.70    4.15
  -9  -3  -3    0.13    3.66
   9   3   3   -0.89    3.52
  -9   3  -4   21.44    4.44
   9  -3   4   20.11    6.02
   9   3   4   18.05    3.48
  -9   3  -5   13.35    3.93
   9  -3   5   15.82    5.21
   9   3   5   15.36    3.07
  -9  -3  -6   12.14    3.07
   9   3   6    8.03    2.36
  -9  -3  -7    8.03    2.46
   9  -4 -15   24.80    2.91
   9  -4 -15   18.83    2.71
   9  -4 -14    1.71    3.12
   9  -4 -14    2.19    3.05
   9  -4 -13   24.55    3.91
   9  -4 -13   12.72    3.01
   9  -4 -12   -1.04    3.88
   9  -4 -12    0.43    3.39
   9  -4 -11   44.48    4.70
   9  -4 -11   52.31    4.87
   9  -4 -10    3.96    3.88
   9  -4 -10    0.10    3.28
   9  -4 -10    8.07    4.03
   9  -4  -9   45.50    4.44
   9  -4  -9   65.25    5.24
   9   4  -8    1.19    3.43
   9  -4  -8    1.78    4.07
   9  -4  -7  143.83    7.55
   9   4  -7  128.33    7.06
   9  -4  -6   13.29    4.56
   9   4  -6   10.28    4.01
   9  -4  -5  457.28   20.15
   9   4  -5  465.21   19.50
   9  -4  -4   41.22    6.12
   9   4  -4   57.87    4.99
   9  -4  -3   65.21    6.81
  -9  -4   3   73.70    4.61
   9  -4  -3   67.56    6.74
   9   4  -3   80.05    5.59
  -9  -4   2   -2.81    3.10
   9  -4  -2    0.92    5.07
   9   4  -2   -1.68    4.01
  -9  -4   1  117.06    6.07
   9  -4  -1  100.78    7.52
   9   4  -1  116.29    6.83
  -9  -4   0   33.07    3.87
   9  -4   0   44.21    6.94
   9  -4   0   34.55    5.49
  -9   4  -1  197.13    9.78
   9  -4   1  218.05   11.66
  -9  -4  -1  206.95    9.44
  -9   4  -2   -0.26    4.16
   9  -4   2    6.27    6.03
  -9  -4  -2    4.22    3.40
   9   4   2    2.24    3.75
  -9   4  -3   23.75    4.55
  -9  -4  -3   27.19    3.75
   9  -4   3   33.28    5.95
   9   4   3   27.46    3.89
  -9   4  -4   62.68    5.31
   9  -4   4   73.82    6.56
   9   4   4   75.37    4.81
   9  -4   5   66.22    5.66
   9   4   5   57.64    4.30
   9  -4   6   51.29    4.38
   9   4   6   65.46    3.71
  -9  -4  -7   31.04    2.64
   9  -5 -14   15.89    2.81
   9  -5 -13   -0.53    3.09
   9  -5 -12  152.32    7.38
   9  -5 -10  207.60    8.91
   9  -5 -10  194.50    8.90
   9  -5  -9    3.38    4.11
   9  -5  -9    1.90    3.32
   9  -5  -9    0.63    3.57
   9  -5  -8  278.24   12.48
   9  -5  -7   -1.07    3.71
   9  -5  -6  148.20    7.92
   9   5  -6  136.46    7.55
   9  -5  -5   51.56    5.00
   9   5  -5   39.60    4.63
   9  -5  -4  146.38    9.01
   9   5  -4  126.03    7.45
  -9  -5   3    6.43    3.19
   9   5  -3    9.13    3.89
  -9  -5   2    8.74    3.24
   9   5  -2    1.84    3.86
   9  -5  -1   63.95    6.61
  -9  -5   1   60.79    4.36
   9   5  -1   69.65    5.17
   9  -5   0   -1.19    5.40
  -9  -5   0    0.78    3.13
   9   5   0    1.00    3.67
   9  -5   1    9.68    5.40
  -9  -5  -1   14.20    3.28
   9  -5   2   14.42    5.12
  -9  -5  -2   13.38    3.27
   9   5   2   15.94    3.59
   9  -5   3   10.16    4.81
  -9  -5  -3    6.55    3.07
   9   5   3   14.17    3.26
   9  -5   4   -1.15    4.16
   9   5   4   -0.36    2.71
   9  -5   5   91.40    6.08
   9   5   5  137.36    5.79
  -9   5  -6   19.27    2.95
  -9  -5  -6   25.05    2.55
   9   5   6   17.33    2.01
   9  -6 -13   -0.72    2.33
   9  -6 -13    3.49    2.35
   9  -6 -13    3.16    2.54
   9  -6 -12   30.87    3.27
   9  -6 -12   30.05    3.36
   9  -6 -11   53.97    4.21
   9  -6 -11   61.32    4.62
   9  -6 -10    5.17    3.17
   9  -6  -9    0.97    3.58
   9  -6  -8   45.96    4.48
   9  -6  -8   54.23    4.44
   9  -6  -7   30.74    4.46
   9  -6  -7   23.45    3.71
   9  -6  -6   70.49    5.24
   9  -6  -5   24.04    3.69
   9   6  -5   17.35    3.67
   9  -6  -4  101.37    6.72
   9   6  -4  149.60    7.00
   9  -6  -3   11.45    3.67
  -9  -6   3   14.76    3.25
   9   6  -3   16.30    3.84
   9  -6  -2  255.96   12.66
  -9  -6   2  239.72   11.07
   9   6  -2  280.96   11.64
   9  -6  -1   10.33    5.34
  -9  -6   1   13.10    3.18
   9   6  -1   19.43    3.77
  -9  -6   0  214.98   10.33
   9   6   0  247.94   10.81
   9  -6   1   24.27    5.15
  -9  -6  -1   24.53    3.21
  -9   6  -2   62.30    5.16
   9  -6   2   71.70    6.16
  -9  -6  -2   66.08    4.36
  -9   6  -3    0.63    3.26
   9  -6   3   -1.58    4.05
  -9  -6  -3    0.24    2.52
   9   6   3   -1.69    2.67
  -9   6  -4   59.99    4.52
   9   6   4   73.95    4.14
  -9   6  -5    2.94    2.52
  -9  -6  -5   -0.59    1.99
   9   6   5    0.72    1.90
  -9  -6  -6  139.00    6.07
   9  -7 -12    0.54    2.33
   9  -7 -12    2.02    2.34
   9  -7 -11   26.81    3.27
   9  -7 -10   22.40    3.24
   9  -7 -10   27.53    3.49
   9  -7  -9    0.84    3.28
   9  -7  -9   -1.03    3.26
   9  -7  -8   45.14    4.35
   9  -7  -8   40.42    4.05
   9  -7  -7    4.81    3.82
   9  -7  -7    3.36    3.37
   9  -7  -6   51.51    4.72
   9  -7  -5    6.06    3.67
   9  -7  -4    6.07    3.81
   9   7  -4    8.29    3.24
   9  -7  -3    8.31    3.74
  -9  -7   3   13.43    2.92
   9   7  -3   15.76    3.45
  -9  -7   2   42.77    3.66
   9   7  -2   50.89    4.09
  -9  -7   1  242.77   11.25
   9   7  -1  300.89   11.73
  -9  -7   0   59.68    3.99
   9   7   0   62.84    4.34
  -9  -7  -1   54.71    3.81
   9   7   1   68.86    4.25
  -9  -7  -2   23.54    2.69
  -9  -7  -3   43.39    3.03
   9   7   4    9.42    2.03
  -9  -7  -5   38.25    2.38
   9   7   5   34.99    2.27
   9  -8 -10    1.29    2.52
   9  -8 -10    1.75    2.38
   9  -8 -10   -1.30    2.40
   9  -8  -9   31.59    3.25
   9  -8  -9   38.01    3.23
   9  -8  -9   34.42    3.39
   9  -8  -8   -4.49    2.74
   9  -8  -8    0.38    2.99
   9  -8  -8   -2.42    3.13
   9  -8  -7   65.07    4.41
   9  -8  -7   57.60    4.21
   9  -8  -7   53.70    3.90
   9  -8  -5   72.40    4.88
   9  -8  -4   -0.56    3.03
  -9  -8   3   87.78    4.97
   9   8  -3  126.83    5.59
  -9  -8   2   54.71    3.67
   9   8  -2   68.14    4.16
  -9  -8   1   32.04    2.97
   9   8  -1   43.86    3.50
  -9  -8   0    4.33    2.12
   9   8   0    2.43    2.48
  -9  -8  -1    0.83    2.02
   9   8   1    0.26    2.29
  -9  -8  -2    0.39    1.89
   9   8   2   -0.44    2.00
  -9  -8  -3    2.48    1.68
   9   8   4    3.47    1.30
   9  -9 -10   13.70    1.96
   9  -9  -9    2.01    2.09
   9  -9  -9    1.28    2.04
   9  -9  -8   34.63    2.96
   9  -9  -8   26.09    2.76
   9  -9  -7    0.26    2.33
   9  -9  -6   32.55    3.18
   9  -9  -5    9.04    2.80
   9  -9  -4  124.44    6.19
   9  -9  -3   -0.71    2.84
   9  -9  -2   24.69    3.01
  -9  -9   2   18.57    2.03
   9   9  -2   21.70    2.24
   9  -9  -1    4.41    2.51
  -9  -9   1    4.17    1.73
   9   9  -1    5.01    1.91
   9  -9   0   24.19    2.77
  -9  -9   0   30.76    2.30
   9   9   0   30.43    2.48
  -9  -9  -1    3.75    1.57
   9   9   1    5.11    1.74
  -9  -9  -2   10.64    1.54
   9   9   2    9.82    1.53
   9 -10  -6    0.32    1.97
   9 -10  -5   44.25    3.06
   9 -10  -4    4.79    2.17
   9 -10  -3   11.94    2.31
  10   0 -15    1.25    2.36
  10   0 -14    2.01    3.14
  10   0 -12   12.60    3.45
  10   0 -12    9.18    3.68
  10   0 -11    4.27    4.01
  10   0 -10   30.10    4.74
  10   0  -9    4.40    4.57
  10   0  -8  662.38   28.41
  10   0  -8  696.14   28.18
  10   0  -7   23.92    5.63
  10   0  -6   69.28    5.73
  10   0  -6   68.07    6.59
  10   0  -5   -4.42    5.17
  10   0  -5    7.72    5.47
  10   0  -4  101.46    7.73
  10   0  -4  109.28    7.64
  10   0  -3   -2.21    5.70
 -10   0   2   36.84    4.51
 -10   0   1   -2.17    4.07
  10   0  -1    0.03    4.91
 -10   0   0  249.03   10.97
  10   0   0  208.38   11.46
 -10   0  -1    0.54    3.44
 -10   0  -1    3.60    4.16
  10   0   1    0.40    4.34
 -10   0  -2  277.11   12.50
 -10   0  -2  298.52   12.82
  10   0   2  276.82   12.99
 -10   0  -3    3.38    3.41
 -10   0  -3    0.30    3.83
  10   0   3    1.55    4.19
 -10   0  -4  104.98    5.67
 -10   0  -4  104.68    6.09
 -10   0  -5    1.76    2.60
 -10   0  -6  100.90    4.97
  10  -1 -15   -1.04    2.54
  10  -1 -14   23.44    2.72
  10   1 -14   24.69    3.17
  10  -1 -12   23.58    3.97
  10  -1 -12   27.26    4.10
  10  -1 -11   23.78    3.87
  10  -1 -11   33.59    4.52
  10   1 -10   92.81    6.50
  10  -1 -10  118.88    6.95
  10  -1  -9   49.67    5.52
  10   1  -9   42.33    5.15
  10   1  -8   19.99    4.95
  10   1  -8   25.78    4.65
  10  -1  -7  185.69   10.80
  10   1  -7  237.18   11.06
  10  -1  -6   23.36    4.70
  10  -1  -6   25.91    5.28
  10   1  -6   21.90    5.36
  10  -1  -5  181.62    9.90
  10   1  -5  163.45    9.54
  10  -1  -5  203.33   10.35
  10   1  -5  184.75    9.79
  10  -1  -4   31.06    5.87
  10   1  -4   24.83    5.69
  10   1  -4   25.99    5.07
  10  -1  -3  167.97   10.40
  10   1  -3  190.53    9.76
  10  -1  -2    2.24    5.75
 -10   1   2   -4.33    3.98
 -10  -1   2   -5.47    4.01
  10  -1  -2    0.11    5.31
 -10   1   1  531.33   21.71
 -10  -1   1  523.38   21.56
  10  -1  -1  478.61   22.28
  10   1  -1  550.72   22.19
 -10  -1   0   95.77    6.15
  10  -1   0   86.93    7.18
  10   1   0   78.23    6.55
 -10   1  -1  277.37   12.43
 -10   1  -1  294.63   12.91
 -10  -1  -1  287.63   12.74
  10  -1   1  279.92   13.39
  10   1   1  296.85   13.12
 -10   1  -2   19.61    3.96
 -10   1  -2   16.14    4.36
 -10  -1  -2   20.53    4.25
  10  -1   2   20.67    4.79
  10   1   2   18.75    4.21
 -10   1  -3  210.34    9.45
 -10   1  -3  203.07    9.68
 -10  -1  -3  211.70    9.61
  10   1   3  220.05    9.82
 -10   1  -4   10.83    3.24
 -10  -1  -4   12.29    3.20
 -10  -1  -4    9.99    3.46
  10   1   4    9.89    3.14
 -10   1  -5  153.34    7.32
 -10  -1  -5  162.07    7.27
 -10   1  -6    2.31    2.09
 -10  -1  -6    1.71    2.09
  10  -1   6    4.83    3.01
  10  -2 -15   37.06    3.18
  10  -2 -14    3.00    3.08
  10  -2 -14   -0.06    2.51
  10  -2 -13  106.07    5.92
  10  -2 -12   16.22    3.80
  10  -2 -12   10.06    2.92
  10  -2 -11  131.40    6.16
  10   2 -11   75.68    5.88
  10   2 -10    1.90    3.67
  10   2  -9    7.48    4.06
  10   2  -8   13.09    4.69
  10   2  -8   19.50    4.42
  10  -2  -7  214.95   10.57
  10   2  -7  211.36   10.19
  10  -2  -6   31.60    5.15
  10  -2  -6   32.11    5.60
  10   2  -6   28.11    4.94
  10  -2  -5   13.09    4.89
  10  -2  -5   10.39    5.16
  10   2  -5   13.58    4.72
  10  -2  -4   40.43    5.85
  10   2  -4   37.63    5.30
  10   2  -4   34.59    5.18
  10  -2  -3   15.02    5.75
  10  -2  -3   21.99    5.86
  10   2  -3   13.61    4.74
 -10  -2   2  184.81    8.91
  10  -2  -2  182.83   10.55
 -10  -2   1  105.62    5.91
  10  -2  -1   95.15    8.31
  10  -2  -1   93.67    7.45
 -10   2   0  302.14   12.08
 -10  -2   0  250.38   11.60
  10  -2   0  291.54   13.66
  10  -2   0  251.96   12.76
  10   2   0  225.15   12.05
 -10  -2  -1   51.07    4.59
  10  -2   1   49.92    5.70
  10   2   1   51.23    4.93
 -10   2  -2   72.10    5.05
 -10  -2  -2   75.40    5.23
  10  -2   2   57.55    5.71
  10   2   2   73.69    5.38
 -10   2  -3   -1.34    3.32
  10  -2   3    1.26    5.01
 -10  -2  -3   -3.92    3.53
  10   2   3   -3.84    3.46
 -10   2  -4   63.68    4.68
 -10  -2  -4   83.39    4.79
  10  -2   4   69.40    6.13
  10   2   4   70.21    4.66
 -10   2  -5    7.56    2.52
 -10  -2  -5    4.99    2.43
  10  -2   5    5.85    3.75
 -10  -2  -6   15.34    2.03
  10  -2   6   11.35    2.75
 -10  -2  -6   14.71    2.23
  10  -3 -14   66.65    4.13
  10  -3 -13   -2.01    3.23
  10  -3 -13    0.05    2.17
  10  -3 -12   32.50    3.52
  10  -3 -12   47.22    4.37
  10  -3 -11  108.62    6.26
  10  -3 -11  118.73    6.63
  10   3 -10    8.39    3.49
  10  -3 -10   10.57    4.09
  10  -3  -9   48.36    4.93
  10   3  -9   28.71    4.17
  10  -3  -8   53.38    5.56
  10   3  -8   42.54    4.99
  10   3  -8   51.50    5.07
  10  -3  -7    2.50    4.72
  10   3  -7    8.58    4.82
  10   3  -7   12.78    4.68
  10  -3  -6  189.86   10.22
  10   3  -6  196.67    9.93
  10  -3  -5   37.00    5.55
  10   3  -5   45.15    5.04
  10  -3  -4   46.37    5.97
  10   3  -4   49.36    5.22
  10  -3  -3   67.59    6.63
  10  -3  -3   50.64    6.26
  10   3  -3   66.29    5.55
 -10  -3   2   22.01    3.66
  10  -3  -2   24.64    6.01
  10  -3  -2   13.66    5.27
  10   3  -2   21.48    4.41
  10  -3  -1    4.19    5.70
 -10  -3   1    1.59    3.27
  10  -3  -1    2.56    4.68
 -10  -3   0   64.17    4.62
  10  -3   0   59.10    5.85
 -10  -3  -1   39.32    3.92
  10   3   1   40.97    4.26
  10  -3   1   35.26    5.01
 -10   3  -2    1.34    3.20
  10  -3   2    3.37    5.18
 -10  -3  -2    0.91    3.18
  10   3   2    1.73    3.27
 -10   3  -3    1.31    2.91
  10  -3   3    7.06    4.79
 -10  -3  -3    0.22    3.11
  10   3   3    1.19    3.06
 -10  -3  -4    8.08    2.97
  10   3   4    9.23    2.89
  10  -3   5   32.54    3.68
 -10  -3  -6   23.62    2.23
  10  -4 -14    2.90    2.32
  10  -4 -14    1.08    2.17
  10  -4 -13   31.11    3.34
  10  -4 -13   35.78    3.57
  10  -4 -12    5.89    3.34
  10  -4 -12    5.40    2.97
  10  -4 -11   80.28    5.16
  10  -4 -10   10.69    3.73
  10  -4 -10   10.23    3.73
  10  -4  -9  161.88    8.98
  10  -4  -9  292.57   10.16
  10   4  -8    1.98    3.47
  10  -4  -8    7.99    4.07
  10  -4  -7  478.92   18.75
  10   4  -7  444.23   18.57
  10  -4  -6   42.02    5.05
  10   4  -6   39.30    4.96
  10   4  -6   42.25    4.89
  10  -4  -5  364.71   16.08
  10   4  -5  361.13   15.80
  10  -4  -4    2.27    5.01
  10   4  -4    8.29    3.93
  10  -4  -3   73.42    6.54
 -10  -4   3   69.64    4.51
  10   4  -3   77.11    5.40
 -10  -4   2   36.24    3.72
  10  -4  -2   40.35    5.81
  10   4  -2   45.12    4.53
 -10  -4   1   36.14    3.77
  10   4  -1   36.99    4.28
 -10  -4   0   14.65    3.28
  10  -4   1    5.56    4.80
 -10  -4  -1    8.40    3.03
  10   4   1    9.41    3.36
  10  -4   2   -3.01    4.48
 -10  -4  -2   -0.62    2.82
  10   4   2    0.41    2.94
  10  -4   3    8.07    4.14
 -10  -4  -3    4.16    2.69
  10   4   3    7.51    2.68
 -10  -4  -4   71.73    4.11
  10   4   4   64.53    3.91
  10  -5 -13   -4.23    2.21
  10  -5 -13    0.23    2.32
  10  -5 -12   36.33    3.20
  10  -5 -11    0.77    2.95
  10  -5 -10   22.39    3.66
  10  -5 -10    9.20    2.87
  10  -5  -9   21.84    3.30
  10  -5  -9   27.67    3.68
  10  -5  -8    6.01    3.56
  10  -5  -7   13.17    3.75
  10  -5  -6    5.04    3.94
  10   5  -6    7.43    3.86
  10  -5  -5   27.57    4.35
  10   5  -5   26.20    4.32
  10  -5  -3  161.77    9.36
  10   5  -3  174.90    8.44
 -10  -5   2   -1.44    2.98
  10   5  -2    1.71    3.24
 -10  -5   1  118.97    6.21
  10   5  -1  134.26    6.69
 -10  -5   0   22.31    3.16
  10  -5   0   29.72    4.88
 -10  -5  -1   27.46    3.10
  10  -5   1   30.22    4.60
 -10  -5  -2   52.94    3.62
  10   5   2   55.91    3.78
 -10  -5  -3   32.33    2.89
  10  -5   3   29.26    3.88
  10   5   3   35.85    2.94
 -10  -5  -4   25.59    2.51
  10   5   4   25.27    2.35
  10  -6 -12   11.27    2.30
  10  -6 -12   14.87    2.55
  10  -6 -11   15.36    3.12
  10  -6 -11   10.34    2.77
  10  -6 -11   20.81    2.89
  10  -6 -10   52.38    3.71
  10  -6 -10   79.31    4.50
  10  -6  -9   23.43    3.14
  10  -6  -8  132.91    6.36
  10  -6  -8  114.95    5.92
  10  -6  -7   13.03    3.64
  10  -6  -7    8.79    2.97
  10  -6  -6   72.50    4.68
  10  -6  -5   43.46    3.80
  10   6  -5   48.10    4.18
  10   6  -4  117.32    6.40
  10   6  -3    7.99    3.26
 -10  -6   2  272.40   12.43
  10   6  -2  354.02   13.05
 -10  -6   1    6.50    2.61
  10   6  -1    8.62    2.97
 -10  -6   0   82.30    4.79
  10   6   0  101.21    5.13
 -10  -6  -1    9.68    2.41
 -10  -6  -2   66.09    3.82
 -10  -6  -3   -0.72    1.85
  10   6   3    0.75    1.85
 -10  -6  -4  102.39    4.64
  10  -7 -11   -0.61    2.05
  10  -7 -10    8.99    2.53
  10  -7 -10    9.37    2.11
  10  -7  -9   26.01    3.07
  10  -7  -9   19.92    2.76
  10  -7  -9   26.68    3.00
  10  -7  -8    1.16    2.96
  10  -7  -8    0.95    2.74
  10  -7  -7   98.69    5.35
  10  -7  -7   86.18    4.95
  10  -7  -6    0.35    3.30
  10  -7  -6    2.69    2.96
  10  -7  -5   81.27    5.02
  10  -7  -4    3.16    3.00
  10   7  -4    3.79    2.61
  10  -7  -3  116.65    6.51
  10   7  -3  163.21    6.78
 -10  -7   2    0.73    2.02
  10   7  -2    4.96    2.59
 -10  -7   1  107.06    5.43
  10   7  -1  139.27    5.91
 -10  -7   0    4.06    2.05
  10   7   0    5.76    2.28
 -10  -7  -1   26.85    2.35
  10   7   1   29.03    2.58
 -10  -7  -2    8.69    1.73
  10  -8  -9   15.71    2.32
  10  -8  -9   16.89    2.15
  10  -8  -8   -0.54    2.21
  10  -8  -8   -1.21    2.26
  10  -8  -7   10.91    2.45
  10  -8  -7   13.91    2.60
  10  -8  -6   14.90    2.52
  10  -8  -5   -0.83    2.28
  10   8  -3    7.45    1.87
  10   8  -2   28.94    2.45
 -10  -8   1   -0.25    1.48
  10   8  -1   -0.90    1.70
 -10  -8   0   23.48    1.91
  10   8   0   24.45    2.18
  10   8   1    4.22    1.47
  10  -9  -5    0.26    1.99
  10  -9  -4   12.67    2.28
  10  -9  -3   34.81    2.59
  11   0 -11   -1.89    3.25
  11   0 -10   17.08    3.84
  11   0  -9   18.58    4.45
  11   0  -8  144.93    8.15
  11   0  -7    9.57    4.88
  11   0  -7    8.44    4.54
  11   0  -6   53.05    5.51
  11   0  -5   -1.25    4.26
  11   0  -5    0.59    4.91
  11   0  -4   41.31    5.34
  11   0  -4   50.06    5.72
  11   0  -3   -5.34    5.01
  11   0  -2  371.04   16.39
  11   0  -2  359.54   16.21
  11   0  -1   -1.62    4.93
 -11   0   1   -2.37    3.44
  11   0  -1    3.47    4.60
 -11   0   0  160.80    7.69
  11   0   0  159.01    8.85
  11   0   0  142.99    8.26
 -11   0  -1   -1.36    3.18
  11   0   1    0.40    3.65
 -11   0  -2  153.33    7.30
  11   0   2  139.64    7.56
  11  -1 -12   -0.50    2.79
  11  -1 -11   10.44    2.72
  11   1 -11    3.42    3.58
  11  -1 -11   13.90    3.45
  11   1 -10    9.92    3.68
  11  -1 -10   12.83    3.78
  11   1  -9  156.08    8.56
  11  -1  -9  180.08    8.71
  11   1  -8   10.30    4.34
  11   1  -7  104.42    6.98
  11   1  -7  104.22    6.81
  11  -1  -6   -0.49    4.38
  11   1  -6   -1.41    4.79
  11  -1  -5   61.45    5.44
  11  -1  -5   58.63    5.77
  11   1  -5   66.94    5.90
  11  -1  -4   -0.34    4.42
  11   1  -4   -2.48    4.34
  11   1  -4    1.53    4.64
  11  -1  -3   80.93    6.39
  11   1  -3   80.36    6.31
  11  -1  -2   -0.36    4.83
  11   1  -2   -5.94    5.01
  11  -1  -2   -3.54    4.78
 -11  -1   1  162.43    7.84
  11  -1  -1  161.57    9.10
  11  -1  -1  158.20    8.75
  11   1  -1  164.25    8.61
  11  -1   0   16.87    4.95
 -11  -1   0    9.28    3.58
  11  -1   0   14.55    4.36
  11   1   0   11.21    4.02
 -11  -1  -1   83.28    5.00
  11  -1   1   87.02    6.28
  11  -1   1   74.30    5.42
  11   1   1   84.60    5.47
 -11  -1  -2   -2.30    2.92
  11  -1   2    3.26    2.61
  11   1   2    2.56    3.20
 -11  -1  -3   45.19    3.38
  11   1   3   37.82    2.99
  11  -1   4    9.90    2.68
  11  -2 -13    1.88    2.25
  11  -2 -12    4.24    2.89
  11  -2 -12   -0.20    2.10
  11  -2 -11   16.40    2.98
  11   2 -10   16.25    3.59
  11   2  -9   12.21    3.68
  11   2  -8   46.92    4.87
  11   2  -8   49.02    4.72
  11  -2  -7    7.99    4.53
  11   2  -7   10.15    4.39
  11   2  -7    8.81    4.42
  11  -2  -6   73.11    6.05
  11   2  -6   71.14    5.82
  11  -2  -5   23.48    4.73
  11   2  -5   20.82    4.66
  11  -2  -4   59.43    5.78
  11   2  -4   68.54    5.68
  11  -2  -3   44.33    5.46
  11   2  -3   48.35    5.03
  11  -2  -3   41.92    5.51
  11   2  -3   50.94    5.30
  11  -2  -2  118.28    7.46
  11   2  -2  111.44    7.17
  11  -2  -2  110.23    7.09
  11  -2  -1   -0.21    4.65
 -11  -2   1   -3.21    3.11
  11  -2  -1   -0.05    4.11
 -11  -2   0  255.22   10.89
  11  -2   0  261.81   12.08
  11   2   0  227.62   11.21
 -11  -2  -1    3.43    2.98
  11   2   1    5.03    3.30
 -11  -2  -2   16.17    2.92
  11   2   2   17.83    3.19
 -11  -2  -3   45.39    3.27
  11  -2   3   47.93    4.08
  11   2   3   38.70    3.05
  11  -2   4    9.10    2.35
 -11  -2  -4    9.38    1.89
  11  -3 -13    0.16    2.31
  11  -3 -13    1.56    2.45
  11  -3 -12   39.96    3.14
  11  -3 -12   61.61    3.84
  11  -3 -11    1.21    2.63
  11  -3 -10   11.34    3.32
  11   3 -10    5.65    2.62
  11  -3 -10   10.54    3.34
  11   3  -9   13.99    3.19
  11  -3  -9   17.01    3.68
  11   3  -8   49.16    4.52
  11  -3  -8   63.14    4.93
  11  -3  -7    4.99    4.27
  11   3  -7    7.67    4.12
  11   3  -7    8.18    3.90
  11  -3  -6    8.86    4.25
  11   3  -6    2.00    4.02
  11   3  -6    0.67    4.27
  11  -3  -5    3.50    4.43
  11   3  -5    9.27    4.18
  11  -3  -4    8.01    4.46
  11   3  -4    5.76    4.07
  11  -3  -3    9.89    4.42
  11   3  -3    8.97    3.84
  11  -3  -2    3.94    4.19
  11   3  -2   -2.49    3.64
  11   3  -2   -1.26    3.57
  11  -3  -1    7.77    4.47
 -11  -3   1    9.45    2.90
 -11  -3   0    5.26    2.78
  11   3   0    5.50    3.22
 -11  -3  -1    3.10    2.69
  11   3   1    2.56    2.90
 -11  -3  -2   45.16    3.35
  11  -3   2   40.60    4.26
  11   3   2   48.66    3.64
  11  -3   3    4.59    2.70
 -11  -3  -3    2.92    2.07
  11   3   3    5.19    1.96
  11  -4 -12   11.59    2.62
  11  -4 -12    8.81    2.06
  11  -4 -11   19.33    2.79
  11  -4 -11   29.14    3.27
  11  -4 -10   73.60    4.72
  11  -4 -10   84.31    4.91
  11  -4  -9   26.04    3.52
  11  -4  -9   27.56    3.49
  11  -4  -8   16.75    2.97
  11  -4  -8   45.80    3.96
  11  -4  -7   40.41    4.18
  11   4  -7   31.43    3.63
  11  -4  -6   24.39    3.97
  11   4  -6   19.72    3.43
  11   4  -6   23.18    4.09
  11  -4  -5   19.03    4.08
  11   4  -5   17.86    3.74
  11   4  -5   19.86    3.96
  11  -4  -4   17.98    4.05
  11   4  -4   19.88    3.98
  11  -4  -3    2.09    4.25
  11   4  -3    3.90    3.51
  11  -4  -2   18.75    4.24
  11   4  -2   15.42    3.54
 -11  -4   1    1.68    2.42
  11   4  -1    1.14    3.03
 -11  -4   0    1.96    2.48
  11  -4   1    4.58    3.25
 -11  -4  -1    4.39    2.29
  11   4   1    3.67    2.58
  11  -4   2   -1.33    3.02
 -11  -4  -2    0.27    2.02
  11   4   2    0.21    2.19
 -11  -4  -3    7.34    1.76
  11  -5 -11   32.62    2.78
  11  -5 -10    1.72    2.56
  11  -5  -9   82.71    4.73
  11  -5  -9  124.42    5.39
  11  -5  -8   -0.35    2.37
  11  -5  -8    0.39    2.71
  11  -5  -7   52.16    3.95
  11  -5  -6   13.08    3.04
  11   5  -6   11.68    2.88
  11  -5  -5   59.97    4.24
  11   5  -5   57.87    4.45
  11  -5  -4   -0.40    2.89
  11  -5  -3  162.03    8.83
  11   5  -3  256.75    9.39
  11  -5  -2    3.78    2.69
  11   5  -2   -3.81    3.04
 -11  -5   1   46.06    3.02
  11   5  -1   50.93    3.71
 -11  -5   0   61.84    3.59
 -11  -5  -1    8.00    1.95
 -11  -5  -2   65.07    3.34
  11   5   2   68.03    3.58
  11  -6 -10   11.87    2.39
  11  -6  -9    0.38    2.41
  11  -6  -8   35.03    3.20
  11  -6  -8   27.67    2.68
  11  -6  -7    5.48    2.87
  11  -6  -7    1.85    2.35
  11  -6  -6   66.96    4.38
  11  -6  -5    7.83    2.73
  11   6  -5    1.40    2.17
  11  -6  -4  122.01    6.25
  11   6  -4  138.22    6.31
  11  -6  -3   15.98    2.54
  11   6  -3   19.13    2.91
  11   6  -2  213.21    9.30
  11   6  -1   26.66    2.74
  11   6   0   60.82    3.52
  11  -7  -9    9.89    1.90
  11  -7  -8   10.95    2.12
  11  -7  -7   28.20    2.61
  11  -7  -7   28.57    2.56
  11  -7  -6   -0.58    2.13
  11  -7  -6   -0.01    2.11
  11  -7  -5   52.44    3.11
  11  -7  -5   41.99    3.17
  11   7  -2   11.05    1.84
  12   0 -10  137.65    6.73
  12   0  -9    2.40    3.04
  12   0  -8  122.71    6.53
  12   0  -7    0.98    3.47
  12   0  -6   67.04    5.10
  12   0  -5   -2.55    3.77
  12   0  -5    0.25    3.59
  12   0  -4   30.74    3.45
  12   0  -4   49.41    4.31
  12   0  -3   -2.26    3.07
  12   0  -2  122.53    6.80
  12   0  -2  141.52    6.97
  12   0  -1   -0.55    2.99
  12   0  -1    0.04    2.89
  12   0   0   10.15    2.96
  12   0   0   11.80    2.68
  12   0   1    1.58    2.33
  12  -1 -11   28.85    2.65
  12  -1 -10    0.03    2.43
  12   1 -10   -0.95    2.54
  12  -1 -10    1.47    2.71
  12   1  -9   73.18    4.82
  12  -1  -9   94.38    5.06
  12   1  -8    1.29    3.17
  12   1  -7   15.19    3.57
  12   1  -6    8.67    3.58
  12   1  -6    9.67    3.66
  12   1  -5    0.32    3.65
  12   1  -5   -3.06    3.55
  12  -1  -4    7.93    3.29
  12   1  -4    5.30    3.61
  12  -1  -3   23.31    3.60
  12   1  -3   21.49    2.91
  12  -1  -3   25.68    3.84
  12  -1  -2    6.68    3.19
  12   1  -2    4.17    2.69
  12  -1  -2    9.80    3.38
  12  -1  -1   10.39    3.09
  12   1  -1   10.96    2.76
  12  -1  -1   11.96    3.13
  12   1  -1   12.45    3.23
  12  -1   0    0.81    2.71
  12   1   0    2.69    2.49
  12   1   0    2.29    2.61
  12  -1   1    1.18    2.30
  12   1   1    2.72    2.24
  12   1   1    0.58    1.80
  12  -2 -11   19.49    2.49
  12  -2 -10   35.25    2.88
  12   2  -9    4.10    2.36
  12   2  -8   44.60    3.66
  12  -2  -8   60.70    4.11
  12  -2  -7   23.64    3.55
  12   2  -7   18.34    3.40
  12  -2  -6   12.70    3.52
  12   2  -6    8.61    3.41
  12   2  -6    6.89    3.26
  12  -2  -5   89.17    5.43
  12   2  -5   81.58    5.24
  12   2  -5   75.09    5.27
  12  -2  -4   46.09    4.31
  12   2  -4   37.70    4.23
  12  -2  -3  115.02    6.39
  12   2  -3  124.74    6.51
  12  -2  -2   18.52    3.36
  12  -2  -1   32.70    3.36
  12   2  -1   30.29    2.90
  12   2  -1   33.02    3.43
  12   2   0   17.13    2.37
  12  -2   0   17.92    2.84
  12   2   0   18.22    2.79
  12  -2   1   31.13    2.73
  12   2   1   29.34    2.40
  12  -3 -11   -0.13    2.06
  12  -3 -10   -1.19    2.18
  12  -3 -10    1.04    2.26
  12  -3  -9   -5.09    2.73
  12  -3  -8    1.65    2.65
  12   3  -7    0.68    2.19
  12  -3  -7   -5.18    3.12
  12  -3  -6   14.61    3.16
  12   3  -6    9.27    2.57
  12   3  -6    6.33    2.79
  12  -3  -5    8.18    3.12
  12   3  -5    5.59    2.69
  12   3  -5    5.84    3.34
  12  -3  -4   75.86    4.96
  12   3  -4   74.62    4.62
  12   3  -4   82.45    4.95
  12  -3  -3   -0.72    3.04
  12   3  -3   -0.07    2.96
  12  -3  -2   33.69    3.64
  12   3  -2   38.04    3.48
  12  -3  -1   15.10    3.00
  12  -3   0   22.01    2.77
  12   3   0   12.96    2.41
  12  -4 -10   24.05    2.35
  12  -4  -9   -1.84    2.21
  12  -4  -9   -0.41    2.00
  12  -4  -8   14.01    2.45
  12  -4  -7    0.21    2.10
  12  -4  -7    5.33    2.33
  12  -4  -6   23.37    2.69
  12   4  -6   15.38    2.27
  12  -4  -5   31.37    2.92
  12   4  -5   26.37    2.92
  12  -4  -4   48.85    3.52
  12   4  -4   50.21    3.74
  12  -4  -3   -0.18    2.21
  12   4  -3    1.12    2.50
  12  -4  -2    8.22    2.10
  12   4  -2   13.69    2.56
  12  -5  -9   27.86    2.39
  12  -5  -6   11.51    2.34
  12  -5  -6    7.15    1.93
  12  -5  -5   35.01    2.81
  12  -5  -4    3.78    2.03
  12   5  -4    5.26    1.94
  12   5  -3   67.43    3.73
  12   5  -2   -0.20    1.77
  13   0  -8   26.16    2.31
  13   0  -7    1.12    1.91
  13   0  -6   22.62    2.50
  13   0  -5    1.34    2.09
  13   0  -4   14.73    2.32
  13   0  -3   -0.43    1.79
  13   1  -6   20.43    2.24
  13   1  -5    0.65    1.90
  13   1  -4   36.98    2.70
  13  -1  -3    0.78    1.77
  13  -2  -7   37.07    2.60
  13  -2  -6    0.62    1.77
  13  -2  -5   37.36    2.64
   0   0   0    0.00    0.00


TITL 20170926-YMH-1 in P2(1)/c
REM P2(1)/c (#14 in standard setting)
CELL 1.54184  10.557019  11.403491  14.323928  90.0000 108.7247  90.0000
ZERR   19.00   0.000807   0.000940   0.001190   0.0000   0.0086   0.0000
LATT  1
SYMM -x, y+1/2,-z+1/2
SFAC C H N O F Cu
UNIT 19.00 19.00 19.00 19.00 19.00 19.00
TREF
HKLF 4
END
_computing_structure_solution     'SHELXT 2014/5 (Sheldrick, 2014)'
;
_shelx_hkl_checksum   21444
