# Supplementary material
Source: publisher figshare collection journal article supplement (https://acs.figshare.com/ndownloader/files/18064346)
Supplement: Supplementary file 1 [file 18064346 › NKU-FlexMOF-1a-N2-a.cif]

# start Validation Reply Form
_vrf_PLAT029_NKU-FlexMOF-1a-N2-a
;
PROBLEM: _diffrn_measured_fraction_theta_full value Low .      0.925 Why?  
RESPONSE:  Because of containing guest molecule, the quality of crystal is poor, many reflections were rejected during 
processing
;
# end Validation Reply Form

data_NKU-FlexMOF-1a-N2-a
_audit_creation_date               2018-11-26
_audit_creation_method
;
Olex2 1.2
(compiled 2018.05.29 svn.r3508 for OlexSys, GUI svn.r5506)
;
_shelx_SHELXL_version_number       '2014/7'
_audit_contact_author_address      ?
_audit_contact_author_email        ?
_audit_contact_author_name         ''
_audit_contact_author_phone        ?
_publ_contact_author_id_orcid      ?
_publ_section_references
;
Dolomanov, O.V., Bourhis, L.J., Gildea, R.J, Howard, J.A.K. & Puschmann, H.
 (2009), J. Appl. Cryst. 42, 339-341.

Sheldrick, G.M. (2015). Acta Cryst. C71, 3-8.
;
_chemical_name_common              ?
_chemical_name_systematic          ?
_chemical_formula_moiety           'C13 H6 Cu F N O4, 0.13(N2)'
_chemical_formula_sum              'C52 H24 Cu4 F4 N5 O16'
_chemical_formula_weight           1304.96
_chemical_melting_point            ?
loop_
  _atom_type_symbol
  _atom_type_description
  _atom_type_scat_dispersion_real
  _atom_type_scat_dispersion_imag
  _atom_type_scat_source
 'C' 'C' 0.0033 0.0016 'International Tables Vol C Tables 4.2.6.8 and 6.1.1.4'
 'H' 'H' 0.0000 0.0000 'International Tables Vol C Tables 4.2.6.8 and 6.1.1.4'
 'Cu' 'Cu' 0.3201 1.2651 'International Tables Vol C Tables 4.2.6.8 and 6.1.1.4'
 'F' 'F' 0.0171 0.0103 'International Tables Vol C Tables 4.2.6.8 and 6.1.1.4'
 'N' 'N' 0.0061 0.0033 'International Tables Vol C Tables 4.2.6.8 and 6.1.1.4'
 'O' 'O' 0.0106 0.0060 'International Tables Vol C Tables 4.2.6.8 and 6.1.1.4'

_shelx_space_group_comment
;
The symmetry employed for this shelxl refinement is uniquely defined
by the following loop, which should always be used as a source of
symmetry information in preference to the above space-group names.
They are only intended as comments.
;
_space_group_crystal_system        'monoclinic'
_space_group_IT_number             14
_space_group_name_H-M_alt          'P 1 21/c 1'
_space_group_name_Hall             '-P 2ybc'
loop_
  _space_group_symop_operation_xyz
 'x, y, z'
 '-x, y+1/2, -z+1/2'
 '-x, -y, -z'
 'x, -y-1/2, z-1/2'

_cell_length_a                     10.488(2)
_cell_length_b                     10.412(2)
_cell_length_c                     15.057(3)
_cell_angle_alpha                  90
_cell_angle_beta                   107.13(3)
_cell_angle_gamma                  90
_cell_volume                       1571.3(6)
_cell_formula_units_Z              1
_cell_measurement_reflns_used      3807
_cell_measurement_temperature      100(2)
_cell_measurement_theta_max        29.173
_cell_measurement_theta_min        2.821
_shelx_estimated_absorpt_T_max     ?
_shelx_estimated_absorpt_T_min     ?
_exptl_absorpt_coefficient_mu      1.410
_exptl_absorpt_correction_T_max    ?
_exptl_absorpt_correction_T_min    ?
_exptl_absorpt_correction_type     'none'
_exptl_absorpt_process_details     ?
_exptl_absorpt_special_details     ?
_exptl_crystal_colour              blue
_exptl_crystal_density_diffrn      1.379
_exptl_crystal_density_meas        ?
_exptl_crystal_density_method      ?
_exptl_crystal_description         rhombus
_exptl_crystal_F_000               651
_exptl_crystal_size_max            0.2
_exptl_crystal_size_mid            0.17
_exptl_crystal_size_min            0.11
_exptl_transmission_factor_max     ?
_exptl_transmission_factor_min     ?
_diffrn_reflns_av_R_equivalents    0.0
_diffrn_reflns_av_unetI/netI       0.0264
_diffrn_reflns_Laue_measured_fraction_full  0.925
_diffrn_reflns_Laue_measured_fraction_max  0.897
_diffrn_reflns_limit_h_max         0
_diffrn_reflns_limit_h_min         14
_diffrn_reflns_limit_k_max         0
_diffrn_reflns_limit_k_min         14
_diffrn_reflns_limit_l_max         -20
_diffrn_reflns_limit_l_min         19
_diffrn_reflns_number              3807
_diffrn_reflns_point_group_measured_fraction_full  0.925
_diffrn_reflns_point_group_measured_fraction_max  0.897
_diffrn_reflns_theta_full          25.242
_diffrn_reflns_theta_max           29.173
_diffrn_reflns_theta_min           2.821
_diffrn_ambient_temperature        100(2)
_diffrn_detector_area_resol_mean   ?
_diffrn_measured_fraction_theta_full  0.925
_diffrn_measured_fraction_theta_max  0.897
_diffrn_measurement_device_type    'Bruker APEX-II CCD'
_diffrn_measurement_method         '\w scans'
_diffrn_radiation_type             MoK\a
_diffrn_radiation_wavelength       0.71073
_diffrn_source                     ?
_diffrn_standards_number           0
_reflns_Friedel_coverage           0.000
_reflns_Friedel_fraction_full      .
_reflns_Friedel_fraction_max       .
_reflns_number_gt                  3340
_reflns_number_total               3807
_reflns_special_details
;
 Reflections were merged by SHELXL according to the crystal
 class for the calculation of statistics and refinement.
 
 _reflns_Friedel_fraction is defined as the number of unique
 Friedel pairs measured divided by the number that would be
 possible theoretically, ignoring centric projections and
 systematic absences.
;
_reflns_threshold_expression       'I > 2\s(I)'
_computing_cell_refinement         ?
_computing_data_collection         ?
_computing_data_reduction          ?
_computing_molecular_graphics      'Olex2 (Dolomanov et al., 2009)'
_computing_publication_material    'Olex2 (Dolomanov et al., 2009)'
_computing_structure_refinement    'ShelXL (Sheldrick, 2015)'
_computing_structure_solution      ?
_refine_diff_density_max           1.008
_refine_diff_density_min           -1.562
_refine_diff_density_rms           0.112
_refine_ls_extinction_coef         .
_refine_ls_extinction_method       none
_refine_ls_goodness_of_fit_ref     1.109
_refine_ls_hydrogen_treatment      constr
_refine_ls_matrix_type             full
_refine_ls_number_parameters       199
_refine_ls_number_reflns           3807
_refine_ls_number_restraints       19
_refine_ls_R_factor_all            0.0813
_refine_ls_R_factor_gt             0.0756
_refine_ls_restrained_S_all        1.107
_refine_ls_shift/su_max            0.000
_refine_ls_shift/su_mean           0.000
_refine_ls_structure_factor_coef   Fsqd
_refine_ls_weighting_details      
 'w=1/[\s^2^(Fo^2^)+(0.1231P)^2^+4.5674P] where P=(Fo^2^+2Fc^2^)/3'
_refine_ls_weighting_scheme        calc
_refine_ls_wR_factor_gt            0.2463
_refine_ls_wR_factor_ref           0.2517
_refine_special_details            ?
_olex2_refinement_description
;
1. Fixed Uiso
 At 1.2 times of:
  All C(H) groups
2. Restrained distances
 N13-N14
 1.18 with sigma of 0.01
3. Uiso/Uaniso restraints and constraints
N13 \\sim N14: within 3.8A with sigma of 0.01 and sigma for terminal atoms of
0.05
Uanis(N13) \\sim Ueq, Uanis(N14) \\sim Ueq: with sigma of 0.01 and sigma for
terminal atoms of 0.05
4. Others
 Fixed Sof: N13(0.125) N14(0.125)
5.a Aromatic/amide H refined with riding coordinates:
 C9(H9), C5(H5), C6(H6), C14(H14), C13(H13), C20(H20)
;
_atom_sites_solution_hydrogens     geom
_atom_sites_solution_primary       ?
_atom_sites_solution_secondary     ?
loop_
  _atom_site_label
  _atom_site_type_symbol
  _atom_site_fract_x
  _atom_site_fract_y
  _atom_site_fract_z
  _atom_site_U_iso_or_equiv
  _atom_site_adp_type
  _atom_site_occupancy
  _atom_site_site_symmetry_order
  _atom_site_calc_flag
  _atom_site_refinement_flags_posn
  _atom_site_refinement_flags_adp
  _atom_site_refinement_flags_occupancy
  _atom_site_disorder_assembly
  _atom_site_disorder_group
 O4 O 0.5298(3) 0.1737(4) 0.4304(3) 0.0526(9) Uani 1 1 d . . . . .
 Cu1 Cu 0.59182(6) 0.58948(6) 0.01064(4) 0.0462(3) Uani 1 1 d . . . . .
 C1 C 0.6315(5) 0.4162(5) 0.1569(4) 0.0494(12) Uani 1 1 d . . . . .
 C2 C 0.7058(5) 0.3584(5) 0.2491(4) 0.0488(11) Uani 1 1 d . . . . .
 C9 C 1.1144(5) 0.4662(6) 0.4109(4) 0.0547(12) Uani 1 1 d . . . . .
 H9 H 1.0603 0.5378 0.3913 0.066 Uiso 1 1 calc R . . . .
 C4 C 0.9139(5) 0.3215(6) 0.3684(4) 0.0506(11) Uani 1 1 d . . . . .
 C5 C 0.8493(5) 0.2370(6) 0.4111(4) 0.0513(12) Uani 1 1 d . . . . .
 H5 H 0.8978 0.1926 0.4638 0.062 Uiso 1 1 calc R . . . .
 C6 C 0.8415(5) 0.3820(6) 0.2870(4) 0.0507(12) Uani 1 1 d . . . . .
 H6 H 0.8843 0.4388 0.2575 0.061 Uiso 1 1 calc R . . . .
 C10 C 1.0604(5) 0.3445(6) 0.4070(4) 0.0507(12) Uani 1 1 d . . . . .
 C7 C 0.7120(5) 0.2175(6) 0.3759(4) 0.0498(11) Uani 1 1 d . . . . .
 F1 F 1.3075(4) 0.5954(3) 0.4496(3) 0.0699(11) Uani 1 1 d . . . . .
 C14 C 1.1475(5) 0.2418(6) 0.4359(4) 0.0492(11) Uani 1 1 d . . . . .
 H14 H 1.1121 0.1594 0.4321 0.059 Uiso 1 1 calc R . . . .
 C13 C 1.3316(5) 0.3743(6) 0.4736(4) 0.0538(12) Uani 1 1 d . . . . .
 H13 H 1.4234 0.3855 0.4966 0.065 Uiso 1 1 calc R . . . .
 C12 C 1.2512(5) 0.4781(6) 0.4450(5) 0.0567(13) Uani 1 1 d . . . . .
 O3 O 0.5228(4) 0.3631(4) 0.1140(3) 0.0530(9) Uani 1 1 d . . . . .
 O1 O 0.6839(4) 0.5104(4) 0.1303(3) 0.0540(9) Uani 1 1 d . . . . .
 N3 N 1.2795(4) 0.2559(5) 0.4687(3) 0.0491(10) Uani 1 1 d . . . . .
 O2 O 0.6943(4) 0.0269(4) 0.4554(3) 0.0562(9) Uani 1 1 d . . . . .
 C21 C 0.6402(5) 0.1322(6) 0.4244(4) 0.0508(12) Uani 1 1 d . . . . .
 C20 C 0.6416(5) 0.2781(6) 0.2939(4) 0.0509(12) Uani 1 1 d . . . . .
 H20 H 0.5504 0.2642 0.2694 0.061 Uiso 1 1 calc R . . . .
 N13 N 0.869(6) 0.783(7) 0.328(4) 0.103(17) Uani 0.125 1 d D U P . .
 N14 N 0.759(6) 0.789(7) 0.279(4) 0.098(16) Uani 0.125 1 d D U P . .

loop_
  _atom_site_aniso_label
  _atom_site_aniso_U_11
  _atom_site_aniso_U_22
  _atom_site_aniso_U_33
  _atom_site_aniso_U_23
  _atom_site_aniso_U_13
  _atom_site_aniso_U_12
 O4 0.0409(17) 0.066(2) 0.051(2) 0.0046(17) 0.0136(15) -0.0002(15)
 Cu1 0.0347(3) 0.0592(4) 0.0424(4) 0.0001(2) 0.0077(3) 0.0003(2)
 C1 0.037(2) 0.068(3) 0.042(3) 0.003(2) 0.010(2) 0.005(2)
 C2 0.040(2) 0.062(3) 0.043(2) 0.003(2) 0.010(2) 0.001(2)
 C9 0.043(2) 0.062(3) 0.057(3) 0.003(2) 0.011(2) 0.002(2)
 C4 0.038(2) 0.062(3) 0.049(3) 0.001(2) 0.009(2) 0.001(2)
 C5 0.039(2) 0.066(3) 0.047(3) 0.002(2) 0.009(2) 0.003(2)
 C6 0.041(2) 0.061(3) 0.049(3) 0.002(2) 0.010(2) -0.001(2)
 C10 0.038(2) 0.066(3) 0.046(3) 0.006(2) 0.009(2) 0.000(2)
 C7 0.040(2) 0.067(3) 0.042(2) -0.001(2) 0.012(2) 0.000(2)
 F1 0.0448(17) 0.065(2) 0.095(3) -0.0038(18) 0.0116(18) -0.0063(14)
 C14 0.040(2) 0.062(3) 0.045(3) 0.003(2) 0.011(2) -0.001(2)
 C13 0.038(2) 0.065(3) 0.055(3) -0.004(2) 0.008(2) -0.002(2)
 C12 0.044(3) 0.059(3) 0.065(3) -0.003(3) 0.013(2) -0.004(2)
 O3 0.0400(17) 0.069(2) 0.0458(19) 0.0066(17) 0.0056(15) -0.0022(16)
 O1 0.0395(17) 0.069(2) 0.049(2) 0.0048(17) 0.0062(15) -0.0013(16)
 N3 0.0381(19) 0.062(3) 0.045(2) -0.0007(18) 0.0095(17) 0.0003(17)
 O2 0.0395(17) 0.071(3) 0.056(2) 0.0097(19) 0.0122(16) 0.0017(16)
 C21 0.035(2) 0.068(3) 0.045(3) 0.002(2) 0.0051(19) -0.001(2)
 C20 0.038(2) 0.066(3) 0.046(3) 0.001(2) 0.009(2) -0.002(2)
 N13 0.13(3) 0.11(3) 0.07(2) -0.03(2) 0.03(2) 0.02(3)
 N14 0.11(3) 0.13(3) 0.06(2) -0.02(2) 0.02(2) 0.00(3)

_geom_special_details
;
 All esds (except the esd in the dihedral angle between two l.s. planes)
 are estimated using the full covariance matrix.  The cell esds are taken
 into account individually in the estimation of esds in distances, angles
 and torsion angles; correlations between esds in cell parameters are only
 used when they are defined by crystal symmetry.  An approximate (isotropic)
 treatment of cell esds is used for estimating esds involving l.s. planes.
;
loop_
  _geom_bond_atom_site_label_1
  _geom_bond_atom_site_label_2
  _geom_bond_distance
  _geom_bond_site_symmetry_2
  _geom_bond_publ_flag
 O4 Cu1 1.963(4) 2_645 ?
 O4 C21 1.263(6) . ?
 Cu1 O4 1.963(4) 2_655 ?
 Cu1 Cu1 2.6306(13) 3_665 ?
 Cu1 O3 1.971(4) 3_665 ?
 Cu1 O1 1.958(4) . ?
 Cu1 N3 2.161(5) 2_755 ?
 Cu1 O2 1.960(4) 4_565 ?
 C1 C2 1.503(7) . ?
 C1 O3 1.261(6) . ?
 C1 O1 1.246(7) . ?
 C2 C6 1.390(7) . ?
 C2 C20 1.370(8) . ?
 C9 C10 1.382(8) . ?
 C9 C12 1.380(7) . ?
 C4 C5 1.379(8) . ?
 C4 C6 1.388(8) . ?
 C4 C10 1.493(7) . ?
 C5 C7 1.395(7) . ?
 C10 C14 1.391(8) . ?
 C7 C21 1.487(8) . ?
 C7 C20 1.390(7) . ?
 F1 C12 1.350(7) . ?
 C14 N3 1.334(6) . ?
 C13 C12 1.360(8) . ?
 C13 N3 1.342(8) . ?
 O3 Cu1 1.971(4) 3_665 ?
 N3 Cu1 2.161(5) 2_745 ?
 O2 Cu1 1.960(4) 4_566 ?
 O2 C21 1.260(7) . ?
 N13 N14 1.180(10) . ?

loop_
  _geom_angle_atom_site_label_1
  _geom_angle_atom_site_label_2
  _geom_angle_atom_site_label_3
  _geom_angle
  _geom_angle_site_symmetry_1
  _geom_angle_site_symmetry_3
  _geom_angle_publ_flag
 C21 O4 Cu1 127.7(4) . 2_645 ?
 O4 Cu1 Cu1 79.71(12) 2_655 3_665 ?
 O4 Cu1 O3 91.37(17) 2_655 3_665 ?
 O4 Cu1 N3 92.20(17) 2_655 2_755 ?
 O3 Cu1 Cu1 80.92(12) 3_665 3_665 ?
 O3 Cu1 N3 96.64(17) 3_665 2_755 ?
 O1 Cu1 O4 88.93(17) . 2_655 ?
 O1 Cu1 Cu1 87.66(12) . 3_665 ?
 O1 Cu1 O3 168.34(17) . 3_665 ?
 O1 Cu1 N3 95.00(17) . 2_755 ?
 O1 Cu1 O2 87.00(18) . 4_565 ?
 N3 Cu1 Cu1 171.45(13) 2_755 3_665 ?
 O2 Cu1 O4 168.21(17) 4_565 2_655 ?
 O2 Cu1 Cu1 89.07(12) 4_565 3_665 ?
 O2 Cu1 O3 90.40(18) 4_565 3_665 ?
 O2 Cu1 N3 99.17(17) 4_565 2_755 ?
 O3 C1 C2 116.2(5) . . ?
 O1 C1 C2 117.0(5) . . ?
 O1 C1 O3 126.8(5) . . ?
 C6 C2 C1 119.9(5) . . ?
 C20 C2 C1 120.2(5) . . ?
 C20 C2 C6 119.9(5) . . ?
 C12 C9 C10 117.8(5) . . ?
 C5 C4 C6 119.0(5) . . ?
 C5 C4 C10 120.7(5) . . ?
 C6 C4 C10 120.2(5) . . ?
 C4 C5 C7 120.6(5) . . ?
 C4 C6 C2 120.6(5) . . ?
 C9 C10 C4 121.7(5) . . ?
 C9 C10 C14 117.9(5) . . ?
 C14 C10 C4 120.3(5) . . ?
 C5 C7 C21 121.1(5) . . ?
 C20 C7 C5 119.3(5) . . ?
 C20 C7 C21 119.6(5) . . ?
 N3 C14 C10 123.1(5) . . ?
 N3 C13 C12 120.6(5) . . ?
 F1 C12 C9 119.4(5) . . ?
 F1 C12 C13 118.8(5) . . ?
 C13 C12 C9 121.8(5) . . ?
 C1 O3 Cu1 125.7(4) . 3_665 ?
 C1 O1 Cu1 118.8(3) . . ?
 C14 N3 Cu1 120.0(4) . 2_745 ?
 C14 N3 C13 118.9(5) . . ?
 C13 N3 Cu1 120.1(3) . 2_745 ?
 C21 O2 Cu1 116.9(3) . 4_566 ?
 O4 C21 C7 116.0(5) . . ?
 O2 C21 O4 126.4(5) . . ?
 O2 C21 C7 117.6(5) . . ?
 C2 C20 C7 120.4(5) . . ?

loop_
  _refln_index_h
  _refln_index_k
  _refln_index_l
  _refln_F_squared_meas
  _refln_F_squared_sigma
 0 0 3 -0.4 0.21
 0 0 4 631.32 16.44
 0 0 5 -0.55 0.29
 0 0 6 7.07 0.43
 0 0 7 -0.33 0.31
 0 0 8 424.2 15.94
 0 0 9 -0.1 0.28
 0 0 10 109 3
 0 0 11 -0.38 0.45
 0 0 12 40.42 1.4
 0 0 13 -0.16 0.45
 0 0 14 78.36 3.03
 0 0 15 0.62 0.36
 0 0 16 15.85 0.98
 0 0 17 -0.2 0.4
 0 0 18 0.78 0.43
 0 0 19 -0.51 0.69
 0 1 0 1.58 0.13
 0 1 3 496.31 11.26
 0 1 5 428.12 8.59
 0 1 6 718.96 15.09
 0 1 7 1602.33 31.74
 0 1 8 0.85 0.42
 0 1 9 264.21 4.96
 0 1 10 60.12 2.73
 0 1 11 71.45 1.44
 0 1 12 42.31 1.52
 0 1 13 54.5 1.45
 0 1 14 26.34 0.76
 0 1 16 62.84 2.09
 0 1 17 14.3 0.69
 0 1 18 7.36 0.41
 0 1 19 -0.02 0.34
 0 2 1 1273 44.27
 0 2 2 834.85 17.85
 0 2 3 1092.96 23.37
 0 2 4 239.82 5.25
 0 2 5 818.54 22.73
 0 2 6 422.85 9.79
 0 2 7 827.44 17.58
 0 2 9 27.96 0.85
 0 2 10 0.26 0.28
 0 2 11 7.31 0.85
 0 2 12 31.86 1.19
 0 2 13 20.27 0.63
 0 2 14 3.31 0.4
 0 2 15 41.49 1.07
 0 2 16 0.73 0.32
 0 2 17 45.61 1.18
 0 2 18 2.06 0.39
 0 2 19 14.37 0.74
 0 3 0 0.04 0.26
 0 3 1 64.84 1.54
 0 3 2 515.1 9.71
 0 3 3 87.93 2.03
 0 3 4 2.19 0.25
 0 3 5 238.22 5.47
 0 3 6 220.45 7.2
 0 3 7 102.4 2.83
 0 3 8 88.38 2.1
 0 3 9 2.82 0.28
 0 3 10 101.23 2.88
 0 3 11 71.37 1.57
 0 3 12 153.85 3.26
 0 3 13 19.97 0.93
 0 3 15 0.25 0.36
 0 3 16 46.69 1.4
 0 3 17 5.98 0.4
 0 3 18 17.06 0.53
 0 4 0 729.81 26.73
 0 4 1 17.66 0.54
 0 4 2 235.4 4.65
 0 4 3 0.37 0.2
 0 4 4 629.5 13.71
 0 4 5 113.87 3.15
 0 4 6 166.95 3.69
 0 4 7 138.94 3.71
 0 4 8 281.66 6.86
 0 4 9 271.96 5.29
 0 4 10 137.13 3.37
 0 4 11 220.77 6.06
 0 4 12 140.92 3.83
 0 4 13 40.18 1.29
 0 4 14 9.55 0.44
 0 4 15 10.47 0.53
 0 4 16 1.55 0.42
 0 4 17 9.48 0.63
 0 4 18 0.95 0.5
 0 5 0 1 0.3
 0 5 1 198.2 4.24
 0 5 2 98.15 1.93
 0 5 3 297.15 6.3
 0 5 4 89.9 2.23
 0 5 5 551.42 10.32
 0 5 6 26.75 0.9
 0 5 7 552.81 11.23
 0 5 8 20.87 0.84
 0 5 9 279.57 6.53
 0 5 10 77.1 1.66
 0 5 11 234.33 5.1
 0 5 12 27.22 0.72
 0 5 13 66.55 1.77
 0 5 14 -0.2 0.24
 0 5 15 7.91 0.42
 0 5 16 0 0.29
 0 5 17 2.48 0.32
 0 5 18 0.09 0.6
 0 6 0 652.38 15.48
 0 6 1 46.45 0.99
 0 6 2 586.89 9.57
 0 6 3 3.5 0.36
 0 6 4 940.15 18.2
 0 6 5 8.28 0.37
 0 6 6 666.58 11.09
 0 6 7 40.51 0.96
 0 6 8 98.07 2.13
 0 6 9 24.61 0.82
 0 6 10 127.7 2.97
 0 6 11 4.98 0.34
 0 6 12 60.93 1.39
 0 6 13 0.5 0.55
 0 6 14 20.84 0.75
 0 6 15 8.6 0.44
 0 6 16 -0.69 0.32
 0 6 17 0.78 0.34
 0 7 0 0.78 0.47
 0 7 1 110.89 2.09
 0 7 3 177.09 4.37
 0 7 4 13.57 0.45
 0 7 5 179.99 3.89
 0 7 6 62.97 1.27
 0 7 7 141.63 2.62
 0 7 8 6.38 0.39
 0 7 9 46.58 1.26
 0 7 10 49.46 1.12
 0 7 11 57.38 1.33
 0 7 12 60.2 1.65
 0 7 13 33.03 0.9
 0 7 14 38.29 1.04
 0 7 15 0.17 0.34
 0 7 16 14.31 0.69
 0 8 1 5.76 0.32
 0 8 2 -0.14 0.32
 0 8 3 80.14 1.75
 0 8 4 1.02 0.33
 0 8 5 89.68 1.98
 0 8 6 35.35 0.79
 0 8 7 50.24 2.09
 0 8 8 4.71 0.33
 0 8 9 36.41 0.92
 0 8 10 2.75 0.33
 0 8 11 36.49 0.98
 0 8 12 6.29 0.49
 0 8 13 42.1 2.19
 0 8 14 2.28 0.48
 0 8 15 3.4 0.44
 0 8 16 -0.45 0.53
 0 9 0 -0.17 0.39
 0 9 1 14.5 0.53
 0 9 2 26.96 0.65
 0 9 3 -0.06 0.28
 0 9 4 20.14 0.54
 0 9 5 10.49 0.44
 0 9 6 8.08 0.51
 0 9 7 51.03 1.12
 0 9 8 3.65 0.38
 0 9 9 23.4 0.8
 0 9 10 41.04 1.34
 0 9 11 5.82 0.38
 0 9 12 29.54 1.44
 0 9 13 1.26 0.35
 0 9 14 3.66 0.34
 0 9 15 0.47 0.44
 0 10 0 38.47 1.14
 0 10 1 0.71 0.28
 0 10 2 52.19 1.32
 0 10 3 1.61 0.28
 0 10 4 35.35 0.85
 0 10 5 44.53 1.03
 0 10 6 89.29 2.51
 0 10 7 32.32 1.03
 0 10 8 21.71 0.65
 0 10 9 6.38 0.55
 0 10 10 5.02 0.44
 0 10 11 9.95 0.54
 0 10 12 2.3 0.39
 0 10 13 5.26 0.47
 0 10 14 8.68 0.55
 0 11 0 0.43 0.42
 0 11 1 25.49 0.63
 0 11 2 2.34 0.37
 0 11 3 36.89 1.07
 0 11 4 2.13 0.31
 0 11 6 -0.04 0.29
 0 11 7 23.22 0.76
 0 11 8 -0.09 0.34
 0 11 9 15.59 0.56
 0 11 10 0.7 0.35
 0 11 11 9.35 0.46
 0 12 1 0.93 0.29
 0 12 3 -0.41 0.29
 0 12 4 8.89 0.41
 0 12 5 3.19 0.32
 0 12 6 12.08 0.56
 0 12 7 3.78 0.34
 0 12 8 3.89 0.36
 0 12 9 4.14 0.4
 0 12 10 0.73 0.36
 0 13 1 6.21 0.4
 0 13 2 3.03 0.31
 0 13 3 0.59 0.33
 0 13 4 5.06 0.33
 0 13 5 1.22 0.43
 0 13 6 0.38 0.35
 0 13 7 1.9 0.36
 0 13 8 1.24 0.44
 0 14 1 0.1 0.41
 0 14 3 0.05 0.61
 1 0 -19 0.92 0.47
 1 0 -18 26.4 1.35
 1 0 -16 68.22 1.96
 1 0 -15 0.26 0.38
 1 0 -14 165.4 4.07
 1 0 -13 -0.76 0.52
 1 0 -12 189.3 6.72
 1 0 -11 0.09 0.3
 1 0 -10 347.81 8.68
 1 0 -9 0.02 0.38
 1 0 -8 2681.38 84.88
 1 0 -7 0.27 0.31
 1 0 -6 1735.99 58.41
 1 0 -5 -0.01 0.2
 1 0 -1 0.07 0.07
 1 0 3 1.56 0.27
 1 0 4 56.78 3.05
 1 0 5 -0.51 0.26
 1 0 6 498.36 19.65
 1 0 8 19.61 0.82
 1 0 9 -0.63 0.5
 1 0 10 0.25 0.44
 1 0 11 -0.17 0.39
 1 0 12 33.83 1.75
 1 0 13 -0.36 0.56
 1 0 14 2.01 0.64
 1 0 15 -0.99 0.55
 1 0 16 5.89 0.48
 1 0 17 0.18 0.43
 1 0 18 -0.2 0.41
 1 0 19 -1.36 0.72
 1 1 -20 1.59 0.39
 1 1 -19 9.34 0.42
 1 1 -18 5.51 0.42
 1 1 -17 35.73 0.89
 1 1 -16 29 0.81
 1 1 -15 86.91 2.43
 1 1 -14 20.53 0.72
 1 1 -13 141.75 3.79
 1 1 -12 11.14 0.51
 1 1 -11 304 6.06
 1 1 -10 2.3 0.28
 1 1 -9 959.52 18.25
 1 1 -8 59.74 1.96
 1 1 -7 79.22 2.35
 1 1 -6 1.38 0.15
 1 1 -5 730.04 15.05
 1 1 -4 537.84 13.72
 1 1 -3 716.54 12.38
 1 1 0 367.03 7.34
 1 1 2 699.73 15.52
 1 1 4 839.3 18.22
 1 1 5 1147.18 29.17
 1 1 6 2039.42 69.91
 1 1 7 709.44 15.33
 1 1 8 192.82 4.39
 1 1 9 50.21 1.7
 1 1 10 47.48 2.45
 1 1 11 8.57 0.41
 1 1 12 46.95 1.34
 1 1 13 9.81 0.37
 1 1 14 9.65 0.38
 1 1 15 -0.1 0.4
 1 1 16 12.98 0.66
 1 1 17 3.57 0.47
 1 1 18 10.6 0.59
 1 1 19 0.59 0.5
 1 2 -19 1.82 0.33
 1 2 -18 4.35 0.39
 1 2 -17 16.04 0.48
 1 2 -16 24.47 0.74
 1 2 -15 13.53 0.52
 1 2 -14 10.68 0.44
 1 2 -13 3.9 0.33
 1 2 -12 19.4 0.7
 1 2 -11 2.67 0.25
 1 2 -10 32.77 0.91
 1 2 -9 93.59 2.02
 1 2 -8 19.6 0.6
 1 2 -7 51.03 1.55
 1 2 -6 1.16 0.17
 1 2 -5 23.36 0.91
 1 2 -4 6.2 0.34
 1 2 -3 79.17 2.14
 1 2 -1 6.74 0.36
 1 2 0 909.61 16.38
 1 2 1 335.25 8.35
 1 2 2 112.55 2.79
 1 2 3 1452.26 27.37
 1 2 4 216.48 5.65
 1 2 5 2144.71 52.71
 1 2 6 961.66 20.6
 1 2 7 455.85 9.77
 1 2 8 239.64 5.26
 1 2 9 186.15 4
 1 2 10 2.94 0.29
 1 2 11 55.99 1.7
 1 2 12 22.15 1.36
 1 2 13 47.61 1.68
 1 2 14 3.13 0.46
 1 2 15 110.36 4.78
 1 2 16 2.29 0.37
 1 2 17 37.17 1.13
 1 2 18 0.74 0.33
 1 2 19 11.29 1.05
 1 3 -19 1.51 0.63
 1 3 -18 18.29 0.57
 1 3 -17 0.05 0.28
 1 3 -16 13.81 0.68
 1 3 -15 0.67 0.36
 1 3 -14 20.99 0.82
 1 3 -13 3.2 0.31
 1 3 -12 70.96 2.48
 1 3 -11 0.92 0.29
 1 3 -10 123.08 2.76
 1 3 -9 27.84 0.76
 1 3 -8 61.01 3.19
 1 3 -7 12.64 0.47
 1 3 -6 39.66 1.32
 1 3 -5 5.4 0.32
 1 3 -4 254.77 5.36
 1 3 -3 354.41 6.68
 1 3 -2 350.63 6.62
 1 3 -1 589.75 12.38
 1 3 0 27.77 0.9
 1 3 1 118.74 3.18
 1 3 2 70.85 1.81
 1 3 3 33.13 1.29
 1 3 4 426.14 8.8
 1 3 5 764.52 17.61
 1 3 6 691.08 15.3
 1 3 7 33.1 1.23
 1 3 8 922.31 19.04
 1 3 9 19.97 0.7
 1 3 10 614.71 12.45
 1 3 11 17.4 1.12
 1 3 12 166.19 3.55
 1 3 13 2.22 0.32
 1 3 14 117.01 3.47
 1 3 15 6.9 0.47
 1 3 16 37.61 1.97
 1 3 17 2.72 0.37
 1 3 18 14.2 0.95
 1 4 -19 4.05 0.71
 1 4 -18 2.64 0.56
 1 4 -17 2.81 0.69
 1 4 -16 11.96 0.51
 1 4 -15 2.3 0.41
 1 4 -14 43.16 1.28
 1 4 -13 16.72 0.72
 1 4 -12 282.57 5.85
 1 4 -11 29.53 0.74
 1 4 -10 142.1 4.03
 1 4 -9 6.7 0.53
 1 4 -8 237 4.68
 1 4 -7 238.96 6.33
 1 4 -6 149.26 3.28
 1 4 -5 29.74 0.9
 1 4 -4 179.35 3.81
 1 4 -3 372.09 6.71
 1 4 -2 1061.91 28.14
 1 4 -1 327.88 6.98
 1 4 0 1750.55 28.88
 1 4 1 288.65 5.5
 1 4 2 1006.21 16.91
 1 4 3 169.29 3.46
 1 4 4 60.66 2.03
 1 4 5 375.73 7.68
 1 4 6 0.46 0.2
 1 4 7 350.43 7.24
 1 4 8 9.43 0.47
 1 4 9 303.61 6
 1 4 10 6.74 0.45
 1 4 11 219.93 5.84
 1 4 12 9.62 0.59
 1 4 13 79.71 1.99
 1 4 14 1.29 0.29
 1 4 15 21.98 0.7
 1 4 16 2.45 0.37
 1 4 17 8.2 0.52
 1 4 18 0.61 0.55
 1 5 -18 0.69 0.4
 1 5 -17 2.97 0.31
 1 5 -16 5.98 0.34
 1 5 -15 28.49 1.06
 1 5 -14 3.5 0.35
 1 5 -13 155.59 3.44
 1 5 -12 12.8 0.45
 1 5 -11 234.63 5.07
 1 5 -10 190.59 4.12
 1 5 -9 378.55 7.19
 1 5 -8 1.72 0.31
 1 5 -7 696.91 18.16
 1 5 -6 5.4 0.29
 1 5 -5 1124.28 19.7
 1 5 -4 181.52 3.5
 1 5 -3 325.22 5.84
 1 5 -2 4.7 0.42
 1 5 -1 319.03 5.62
 1 5 0 267.91 4.8
 1 5 1 134.87 2.61
 1 5 2 86.74 2.47
 1 5 3 253.85 9.73
 1 5 4 0.74 0.25
 1 5 5 351.41 7.75
 1 5 6 33.18 0.95
 1 5 7 109.94 3.06
 1 5 8 25.95 0.78
 1 5 9 101.08 2.56
 1 5 10 92.64 2.05
 1 5 11 42.77 1.02
 1 5 12 62.23 1.35
 1 5 13 0.66 0.27
 1 5 14 2.22 0.34
 1 5 15 0.7 0.31
 1 5 16 4.67 0.38
 1 5 17 0.57 0.44
 1 6 -18 5.1 0.51
 1 6 -17 -0.45 0.42
 1 6 -16 5.12 0.53
 1 6 -15 14.48 0.53
 1 6 -14 45.95 1.27
 1 6 -13 1.85 0.29
 1 6 -12 85.9 1.97
 1 6 -11 2.14 0.36
 1 6 -10 216.76 4.96
 1 6 -9 14.81 0.49
 1 6 -8 887.9 17.5
 1 6 -7 73.52 3.19
 1 6 -6 1243.31 20.35
 1 6 -5 12.29 0.44
 1 6 -4 831.84 14.06
 1 6 -3 127.94 2.44
 1 6 -2 415.34 7.59
 1 6 -1 120.77 2.28
 1 6 0 458.91 7.8
 1 6 1 51.72 1.12
 1 6 2 188.75 3.33
 1 6 3 1.04 0.24
 1 6 4 52.79 1.25
 1 6 5 29.47 1.07
 1 6 6 60.63 1.36
 1 6 7 12.83 0.45
 1 6 8 2.62 0.39
 1 6 9 10.5 0.45
 1 6 10 37.26 0.96
 1 6 11 1.22 0.3
 1 6 12 15.82 0.53
 1 6 13 -0.4 0.24
 1 6 14 0.45 0.27
 1 6 15 4.5 0.37
 1 6 16 1.1 0.38
 1 6 17 0.67 0.58
 1 7 -17 2.06 0.37
 1 7 -16 2.02 0.31
 1 7 -15 24.54 0.94
 1 7 -14 26.78 0.82
 1 7 -13 34.03 0.92
 1 7 -12 57.45 1.71
 1 7 -11 24.67 0.7
 1 7 -10 33.37 0.85
 1 7 -9 6.02 0.39
 1 7 -8 4.3 0.32
 1 7 -7 574.18 10.74
 1 7 -6 95.42 2.12
 1 7 -5 513.09 8.55
 1 7 -4 132.86 3.07
 1 7 -3 223.71 4.5
 1 7 -2 173.17 3.58
 1 7 -1 1.22 0.28
 1 7 0 15.46 0.46
 1 7 1 35.64 0.79
 1 7 2 160.27 3.65
 1 7 3 110.7 2.07
 1 7 4 112.07 2.22
 1 7 5 105.26 2.03
 1 7 6 98.89 2.27
 1 7 7 22.81 0.76
 1 7 8 98.28 1.95
 1 7 9 26.24 0.74
 1 7 10 54.4 1.26
 1 7 11 7.81 0.4
 1 7 12 50.41 1.51
 1 7 13 1.32 0.42
 1 7 14 12.15 0.54
 1 7 15 5 0.36
 1 7 16 7.84 1.03
 1 8 -16 0.88 0.44
 1 8 -15 0.13 0.42
 1 8 -14 19.82 0.74
 1 8 -13 4.78 0.48
 1 8 -12 12.82 0.52
 1 8 -11 11.79 0.74
 1 8 -10 2.6 0.57
 1 8 -9 70.33 1.99
 1 8 -8 47.36 1.14
 1 8 -7 59.19 1.24
 1 8 -6 0.84 0.33
 1 8 -5 44.83 1.14
 1 8 -4 1.9 0.31
 1 8 -3 221.68 4.37
 1 8 -2 0.95 0.36
 1 8 -1 246.57 4.29
 1 8 0 0.2 0.29
 1 8 1 102.28 1.85
 1 8 2 25.23 0.66
 1 8 3 115.65 2.19
 1 8 4 51.03 1.15
 1 8 5 131.19 2.35
 1 8 6 0.15 0.31
 1 8 7 63.06 2.58
 1 8 8 1.82 0.35
 1 8 9 85.04 1.77
 1 8 10 12.53 0.55
 1 8 11 79.46 1.82
 1 8 12 5.84 0.39
 1 8 13 33.36 1.2
 1 8 14 0.08 0.35
 1 8 15 8.95 0.74
 1 9 -15 2.72 0.47
 1 9 -14 9.15 0.45
 1 9 -13 -0.23 0.47
 1 9 -12 7.26 0.41
 1 9 -11 3.86 0.37
 1 9 -10 3.65 0.32
 1 9 -9 1.88 0.31
 1 9 -8 27.83 0.72
 1 9 -7 21.91 0.57
 1 9 -6 0.32 0.26
 1 9 -5 12.76 0.46
 1 9 -4 8.69 0.38
 1 9 -3 0.6 0.29
 1 9 -2 11.38 0.57
 1 9 -1 0.32 0.28
 1 9 0 1.32 0.25
 1 9 1 0.78 0.26
 1 9 2 16.81 0.59
 1 9 3 22.81 0.62
 1 9 4 99.58 2.59
 1 9 5 31.1 0.76
 1 9 6 15.02 0.56
 1 9 7 20.4 0.61
 1 9 8 14 0.51
 1 9 9 11.08 0.55
 1 9 10 49.23 1.17
 1 9 11 0.71 0.38
 1 9 12 65.89 1.76
 1 9 13 0.88 0.26
 1 9 14 11.57 0.5
 1 10 -14 7.24 0.87
 1 10 -13 2.26 0.37
 1 10 -12 13.87 0.5
 1 10 -11 3.79 0.44
 1 10 -10 14.1 0.52
 1 10 -9 15.64 0.84
 1 10 -8 22.73 0.65
 1 10 -7 5.22 0.46
 1 10 -6 19.77 0.64
 1 10 -5 4.63 0.37
 1 10 -4 32.41 0.87
 1 10 -3 11.54 0.42
 1 10 -2 64.59 1.32
 1 10 -1 28.15 0.81
 1 10 0 76.87 1.49
 1 10 1 68.6 1.36
 1 10 2 38.77 1.03
 1 10 3 74.17 1.67
 1 10 4 7.38 0.38
 1 10 5 7.52 0.44
 1 10 6 8.85 0.5
 1 10 7 16.63 0.71
 1 10 8 -0.02 0.35
 1 10 9 8.12 0.5
 1 10 10 6.01 0.41
 1 10 11 11.06 0.58
 1 10 12 4.33 0.56
 1 10 13 -0.25 0.63
 1 11 -12 1.09 0.42
 1 11 -11 16.03 0.62
 1 11 -10 -0.08 0.31
 1 11 -9 21.27 0.64
 1 11 -8 0.61 0.33
 1 11 -7 32.93 0.85
 1 11 -6 -0.41 0.3
 1 11 -5 26.25 0.7
 1 11 -4 3.14 0.34
 1 11 -2 3.81 0.33
 1 11 -1 39.8 0.91
 1 11 0 2.43 0.32
 1 11 1 23.26 0.67
 1 11 2 0.02 0.3
 1 11 3 2.84 0.33
 1 11 4 0.59 0.35
 1 11 5 44.36 1.48
 1 11 6 0.48 0.29
 1 11 7 12.93 0.48
 1 11 8 -0.03 0.27
 1 11 9 1.63 0.34
 1 11 10 0.54 0.35
 1 11 11 0.03 0.42
 1 12 -10 7.89 0.48
 1 12 -9 1.2 0.32
 1 12 -8 10.07 0.46
 1 12 -7 4.15 0.33
 1 12 -6 23.47 0.84
 1 12 -5 1.17 0.35
 1 12 -4 19.28 0.66
 1 12 -3 0.1 0.37
 1 12 -1 -0.96 0.42
 1 12 0 13.49 0.5
 1 12 1 11.43 0.51
 1 12 2 5.46 0.4
 1 12 3 2.01 0.35
 1 12 4 6.38 0.4
 1 12 5 2.92 0.35
 1 12 6 1.54 0.3
 1 12 7 6.23 0.43
 1 12 8 0.45 0.43
 1 12 9 5.95 0.36
 1 12 10 -0.5 0.38
 1 13 -8 -0.21 0.32
 1 13 -7 7.34 0.46
 1 13 -6 0.05 0.34
 1 13 -5 2.98 0.37
 1 13 -4 0.49 0.44
 1 13 -3 3.06 0.37
 1 13 -2 1.24 0.44
 1 13 -1 3.22 0.41
 1 13 0 10.43 0.43
 1 13 1 0.24 0.26
 1 13 2 0.63 0.28
 1 13 3 0.29 0.36
 1 13 4 2.24 0.34
 1 13 5 0.46 0.35
 1 13 6 1.92 0.36
 1 13 7 1.01 0.48
 1 14 -2 0.9 0.38
 1 14 -1 1.38 0.41
 1 14 0 0.55 0.34
 1 14 1 1.43 0.59
 2 0 -20 8.19 0.49
 2 0 -19 -0.44 0.32
 2 0 -18 35.08 1.17
 2 0 -17 0.46 0.38
 2 0 -16 59.27 2.33
 2 0 -15 0.43 0.29
 2 0 -14 280.78 6.9
 2 0 -13 -0.11 0.26
 2 0 -12 747.59 17.13
 2 0 -11 0.39 0.27
 2 0 -9 -0.29 0.18
 2 0 -8 1978.89 63.08
 2 0 -7 0.53 0.11
 2 0 -3 1.75 0.16
 2 0 -1 0.41 0.23
 2 0 0 906.51 24.67
 2 0 1 4.34 0.46
 2 0 2 60.23 2.47
 2 0 3 0.24 0.41
 2 0 4 2.47 0.45
 2 0 5 -0.63 0.25
 2 0 7 0.18 0.3
 2 0 8 180.31 7.28
 2 0 9 -0.1 0.5
 2 0 10 29.04 1.65
 2 0 11 0.73 0.42
 2 0 12 5.8 0.69
 2 0 13 0.4 0.38
 2 0 14 19.39 0.75
 2 0 15 -0.1 0.61
 2 0 16 16.45 1.16
 2 0 17 -0.04 0.65
 2 0 18 2.4 0.81
 2 1 -20 0.41 0.37
 2 1 -19 12.99 0.6
 2 1 -18 1.11 0.24
 2 1 -17 44.64 1.38
 2 1 -16 8.71 0.36
 2 1 -15 84.42 1.89
 2 1 -14 18.38 0.75
 2 1 -13 246.2 4.77
 2 1 -11 202.43 5.07
 2 1 -9 230.52 5.89
 2 1 -8 581 13.93
 2 1 -6 549.88 10.68
 2 1 -5 10.86 0.39
 2 1 -4 594.08 10.14
 2 1 -3 1121.16 18.9
 2 1 -2 1165.78 20.7
 2 1 0 15.57 0.58
 2 1 1 216.45 6.8
 2 1 2 260.91 5.83
 2 1 3 379.05 8.04
 2 1 4 828.17 16
 2 1 5 806.04 15.32
 2 1 6 1034.8 21.46
 2 1 7 13.98 0.86
 2 1 8 393.49 8.73
 2 1 9 28.53 0.91
 2 1 10 15.23 0.54
 2 1 11 11.95 0.54
 2 1 12 1.26 0.26
 2 1 13 54.24 1.36
 2 1 14 16.63 0.62
 2 1 15 13.81 0.47
 2 1 16 2.07 0.32
 2 1 17 7.53 0.58
 2 1 18 0.58 0.37
 2 2 -20 6.48 0.7
 2 2 -19 3.15 0.34
 2 2 -18 7.81 0.82
 2 2 -17 3.71 0.48
 2 2 -16 9.19 0.4
 2 2 -15 3.21 0.24
 2 2 -14 23.39 1.22
 2 2 -13 0.64 0.29
 2 2 -12 20.36 1.04
 2 2 -11 293.55 5.93
 2 2 -10 218.91 8.05
 2 2 -9 183.35 4.92
 2 2 -8 221.27 6.18
 2 2 -7 83.72 1.77
 2 2 -6 261.83 5.12
 2 2 -5 138.06 4.29
 2 2 -4 26.8 0.77
 2 2 -2 37.1 1.05
 2 2 -1 553.29 10.52
 2 2 0 77.6 2
 2 2 1 365.62 7.94
 2 2 2 150.24 3.5
 2 2 3 424.4 9.03
 2 2 4 389.32 9
 2 2 5 1567.6 33.59
 2 2 6 25.28 0.89
 2 2 7 739.14 15.02
 2 2 8 12.22 0.48
 2 2 9 347.26 8.61
 2 2 10 3.85 0.39
 2 2 11 134.14 3.15
 2 2 12 8.93 0.47
 2 2 13 64.91 1.63
 2 2 14 -0.25 0.28
 2 2 15 31.41 0.73
 2 2 16 8.99 0.6
 2 2 17 19.12 0.87
 2 2 18 6.04 0.47
 2 3 -19 0 0.48
 2 3 -18 0.58 0.53
 2 3 -17 1.58 0.29
 2 3 -16 5.74 0.35
 2 3 -15 0.29 0.3
 2 3 -14 53.53 1.85
 2 3 -13 12.59 0.54
 2 3 -11 0.74 0.23
 2 3 -10 200.7 3.79
 2 3 -9 0.06 0.22
 2 3 -8 174.29 3.5
 2 3 -7 13.38 0.49
 2 3 -6 531.49 11.6
 2 3 -5 69.57 2.3
 2 3 -4 1100.55 22.61
 2 3 -3 181.69 4.4
 2 3 -2 230.09 4.48
 2 3 -1 96.39 2.16
 2 3 0 835.53 15.14
 2 3 1 786.86 14.82
 2 3 2 593.41 11.86
 2 3 3 359.55 8.05
 2 3 4 2649.53 55.28
 2 3 5 37.99 1.81
 2 3 6 1368.71 25.27
 2 3 7 9.6 0.43
 2 3 8 748.98 18.87
 2 3 9 -0.58 0.26
 2 3 11 9.36 0.5
 2 3 12 65.49 1.86
 2 3 13 25.09 0.71
 2 3 14 89.9 2.96
 2 3 15 1.72 0.29
 2 3 16 39.71 1.19
 2 3 17 3.27 0.33
 2 3 18 10.46 0.69
 2 4 -19 6.91 0.52
 2 4 -18 6.17 0.36
 2 4 -17 6.23 0.51
 2 4 -16 19.92 0.74
 2 4 -15 14.03 0.53
 2 4 -14 11.79 0.57
 2 4 -13 4.25 0.32
 2 4 -12 7 0.35
 2 4 -11 0.8 0.29
 2 4 -10 279.95 6.16
 2 4 -9 94.26 2.15
 2 4 -8 321.55 6.47
 2 4 -7 467.96 10.21
 2 4 -6 638.57 13.74
 2 4 -5 483.63 9.1
 2 4 -4 60.45 1.45
 2 4 -3 621.33 11.12
 2 4 -2 1187.31 23.51
 2 4 -1 1036.5 17.7
 2 4 0 1571.93 26.94
 2 4 1 877.52 22.68
 2 4 2 262.59 5.3
 2 4 3 683.2 13.22
 2 4 4 103.56 2.77
 2 4 5 12.04 0.79
 2 4 6 193.67 4.46
 2 4 7 142.02 3.47
 2 4 8 7.87 0.44
 2 4 9 192.24 3.97
 2 4 10 28.43 0.9
 2 4 11 172.4 4.43
 2 4 12 38.58 1.29
 2 4 13 55.73 1.71
 2 4 14 2.04 0.32
 2 4 15 40.37 1.47
 2 4 16 0.39 0.35
 2 4 17 11.47 0.47
 2 5 -19 11.33 0.98
 2 5 -18 1.61 0.32
 2 5 -17 25.4 0.79
 2 5 -16 0.96 0.37
 2 5 -15 34.23 1.08
 2 5 -14 8.23 0.57
 2 5 -13 57.15 1.24
 2 5 -12 20.1 0.55
 2 5 -11 25.3 0.77
 2 5 -10 14.34 0.45
 2 5 -9 698.23 14.56
 2 5 -8 111.54 2.26
 2 5 -7 748.41 12.74
 2 5 -6 23.34 0.63
 2 5 -4 219 4.11
 2 5 -3 76.02 1.62
 2 5 -2 356.15 6.31
 2 5 -1 341.88 5.86
 2 5 0 24.51 0.66
 2 5 1 611.6 11.15
 2 5 2 1.94 0.27
 2 5 3 1.76 0.32
 2 5 4 39.11 0.98
 2 5 5 26.76 0.81
 2 5 6 32.38 1.12
 2 5 7 14.57 0.57
 2 5 8 29.61 0.87
 2 5 9 6.79 0.51
 2 5 10 55.64 1.29
 2 5 11 16.31 0.55
 2 5 12 83.71 1.78
 2 5 13 39.27 1.55
 2 5 14 2.06 0.31
 2 5 15 2.51 0.46
 2 5 16 0.6 0.31
 2 5 17 1.87 0.73
 2 6 -18 5.54 0.82
 2 6 -17 0.73 0.55
 2 6 -16 45.11 1.32
 2 6 -15 0.16 0.24
 2 6 -14 168.35 3.62
 2 6 -13 0.1 0.51
 2 6 -12 148.39 3.47
 2 6 -11 3.16 0.37
 2 6 -10 34.1 0.85
 2 6 -9 67.28 1.65
 2 6 -8 334.42 5.83
 2 6 -7 81.55 1.58
 2 6 -6 555.31 11.12
 2 6 -5 10.33 0.43
 2 6 -4 564.08 11.09
 2 6 -3 170.92 3.82
 2 6 -2 56.05 1.63
 2 6 -1 3.58 0.32
 2 6 0 5.5 0.29
 2 6 1 6.29 0.31
 2 6 2 36.8 0.9
 2 6 3 9.54 0.4
 2 6 4 2.85 0.31
 2 6 5 6.76 0.33
 2 6 6 3.51 0.34
 2 6 7 65.35 1.75
 2 6 8 1.7 0.38
 2 6 9 9.63 0.43
 2 6 10 1.36 0.28
 2 6 11 0.98 0.61
 2 6 12 22.37 0.85
 2 6 13 0.15 0.3
 2 6 14 36.28 1.33
 2 6 15 0.45 0.41
 2 6 16 1.87 0.29
 2 7 -17 0.69 0.71
 2 7 -16 0.7 0.31
 2 7 -15 48.46 1.54
 2 7 -14 20.07 0.98
 2 7 -13 35.68 2.02
 2 7 -12 42.57 1.1
 2 7 -11 47.27 1.16
 2 7 -10 86.62 2.17
 2 7 -9 10 0.39
 2 7 -8 2.36 0.31
 2 7 -7 435.49 8.86
 2 7 -6 11.23 0.6
 2 7 -5 183.31 3.96
 2 7 -4 185.85 3.48
 2 7 -3 58.1 1.16
 2 7 -2 276.9 5.52
 2 7 -1 34.96 0.95
 2 7 0 220.22 4.57
 2 7 1 6.1 0.32
 2 7 2 143.12 2.65
 2 7 3 31.46 0.78
 2 7 4 220.27 3.92
 2 7 5 3.49 0.33
 2 7 6 83.59 1.71
 2 7 7 34.68 0.89
 2 7 8 110.77 3.02
 2 7 9 0.29 0.27
 2 7 10 115.56 3.28
 2 7 11 2.69 0.3
 2 7 12 32.68 1.1
 2 7 13 1.49 0.3
 2 7 14 0.69 0.31
 2 7 15 14.71 0.75
 2 7 16 0.59 0.35
 2 8 -16 1.5 0.36
 2 8 -15 1.12 0.39
 2 8 -14 8.27 0.66
 2 8 -13 0.34 0.26
 2 8 -12 2.81 0.43
 2 8 -11 3.13 0.5
 2 8 -10 21.71 0.65
 2 8 -9 29 0.72
 2 8 -8 1.45 0.29
 2 8 -7 45.77 1.01
 2 8 -6 -0.2 0.36
 2 8 -5 231.66 4.04
 2 8 -4 16.81 0.54
 2 8 -3 228.4 4.72
 2 8 -2 19.12 0.62
 2 8 -1 205.63 3.63
 2 8 0 124.79 2.28
 2 8 1 172.4 3.46
 2 8 2 17.48 0.54
 2 8 3 241.12 8.17
 2 8 4 4.67 0.36
 2 8 5 147.43 3.67
 2 8 6 0.22 0.3
 2 8 7 76.77 1.76
 2 8 8 7.6 0.4
 2 8 9 68.62 1.73
 2 8 10 -0.49 0.25
 2 8 11 76.95 1.95
 2 8 12 1.14 0.3
 2 8 13 20.11 0.71
 2 8 14 0.33 0.59
 2 8 15 18.8 1.19
 2 9 -15 -0.2 0.34
 2 9 -14 11.58 0.67
 2 9 -13 -0.26 0.27
 2 9 -12 12.09 0.46
 2 9 -11 4.41 0.37
 2 9 -10 4.28 0.32
 2 9 -9 7.4 0.42
 2 9 -8 2.99 0.35
 2 9 -7 14.34 0.62
 2 9 -6 1 0.26
 2 9 -5 6.97 0.4
 2 9 -4 3.04 0.29
 2 9 -3 7 0.38
 2 9 -2 13.96 0.5
 2 9 -1 5.58 0.37
 2 9 0 136.4 2.88
 2 9 1 0.41 0.35
 2 9 3 6.79 0.44
 2 9 5 27.62 0.68
 2 9 6 56.31 1.41
 2 9 7 0.48 0.3
 2 9 8 94.11 3.11
 2 9 9 0.79 0.31
 2 9 10 65.52 1.55
 2 9 11 1.72 0.34
 2 9 12 27.92 1.08
 2 9 13 1.11 0.35
 2 9 14 4.31 0.43
 2 10 -14 11.55 0.64
 2 10 -13 0.57 0.3
 2 10 -12 12.35 0.52
 2 10 -11 1.27 0.39
 2 10 -10 5.93 0.48
 2 10 -9 5.81 0.37
 2 10 -8 17.46 0.59
 2 10 -7 8.19 0.43
 2 10 -6 30.36 0.77
 2 10 -5 44.91 0.98
 2 10 -4 68.54 2.77
 2 10 -3 26.51 0.67
 2 10 -2 35.03 0.9
 2 10 -1 18.74 0.61
 2 10 0 1.44 0.27
 2 10 1 33.66 0.75
 2 10 2 4.73 0.38
 2 10 4 4.74 0.39
 2 10 5 23.11 0.63
 2 10 6 -0.5 0.41
 2 10 7 5.91 0.38
 2 10 8 -0.44 0.3
 2 10 9 6.02 0.41
 2 10 10 2.08 0.37
 2 10 11 2.07 0.52
 2 10 12 0.88 0.31
 2 11 -13 13.11 0.63
 2 11 -12 1.31 0.63
 2 11 -11 12.51 0.63
 2 11 -10 -0.04 0.29
 2 11 -9 15.38 0.52
 2 11 -8 0.34 0.28
 2 11 -7 30.83 1.34
 2 11 -6 -0.32 0.3
 2 11 -5 34.49 1.04
 2 11 -4 -0.13 0.3
 2 11 -3 21.75 0.6
 2 11 -2 0.11 0.32
 2 11 -1 8.43 0.39
 2 11 0 0.6 0.46
 2 11 1 12.76 0.47
 2 11 2 12.09 0.43
 2 11 3 4.83 0.41
 2 11 4 1.06 0.31
 2 11 5 0.84 0.31
 2 11 6 0.05 0.32
 2 11 7 13.83 0.52
 2 11 8 0.4 0.37
 2 11 9 8.09 0.55
 2 11 10 0.58 0.37
 2 11 11 0.51 0.4
 2 12 -11 0.66 0.35
 2 12 -10 6.1 0.41
 2 12 -9 4.24 0.36
 2 12 -8 8.49 0.43
 2 12 -7 5.38 0.34
 2 12 -6 1.67 0.35
 2 12 -5 1.63 0.33
 2 12 -4 5.93 0.38
 2 12 -3 1.44 0.32
 2 12 -2 10.14 0.4
 2 12 -1 4.32 0.47
 2 12 0 6.22 0.35
 2 12 1 4.16 0.52
 2 12 2 0.79 0.34
 2 12 3 12.1 0.51
 2 12 4 0.63 0.31
 2 12 5 1.1 0.34
 2 12 6 0.05 0.33
 2 12 7 1.89 0.48
 2 12 8 -0.54 0.5
 2 12 9 0.8 0.43
 2 13 -8 7.79 0.42
 2 13 -7 5.26 0.32
 2 13 -6 5.5 0.35
 2 13 -5 1.32 0.33
 2 13 -4 2.04 0.45
 2 13 -3 1.04 0.36
 2 13 -2 0.47 0.35
 2 13 -1 2.49 0.35
 2 13 0 9.6 0.45
 2 13 1 0.87 0.29
 2 13 2 5.38 0.45
 2 13 3 1.06 0.35
 2 13 4 2.73 0.37
 2 13 5 0.69 0.39
 2 14 -3 3.1 0.53
 2 14 -2 0.52 0.52
 2 14 -1 5.02 0.61
 3 0 -19 -0.23 0.33
 3 0 -17 -0.5 0.33
 3 0 -16 26.74 0.82
 3 0 -15 0.23 0.22
 3 0 -14 341.79 10.81
 3 0 -13 0.23 0.28
 3 0 -12 512.23 16.31
 3 0 -11 0.29 0.15
 3 0 -5 -0.02 0.08
 3 0 -4 212.87 7.72
 3 0 -3 -0.12 0.16
 3 0 -2 151.68 7.14
 3 0 0 1604.21 61.06
 3 0 1 -0.01 0.22
 3 0 2 394.67 18.72
 3 0 3 -0.55 0.25
 3 0 4 467.19 13.94
 3 0 5 -0.22 0.41
 3 0 6 278.54 7.7
 3 0 7 -0.49 0.54
 3 0 9 0.44 0.34
 3 0 10 5.35 0.46
 3 0 11 0.37 0.4
 3 0 12 81.76 2.65
 3 0 13 -0.58 0.47
 3 0 15 0.19 0.48
 3 0 17 -0.26 0.48
 3 1 -19 14.02 0.74
 3 1 -18 3.55 0.32
 3 1 -17 15.59 0.45
 3 1 -15 10.95 0.34
 3 1 -14 2.11 0.21
 3 1 -13 2.84 0.16
 3 1 -12 343.18 7.82
 3 1 -11 216.26 5.05
 3 1 -10 507.25 16.26
 3 1 -6 15.58 0.4
 3 1 -5 74.29 3.17
 3 1 -4 113.7 2.82
 3 1 -3 427.71 11.41
 3 1 -2 429.52 12.29
 3 1 -1 13.32 0.7
 3 1 0 92.3 2.51
 3 1 1 147.54 3.83
 3 1 2 359.52 8.47
 3 1 3 1.99 0.21
 3 1 4 649.31 12.85
 3 1 5 293.78 11.46
 3 1 6 246.89 6.15
 3 1 7 670.25 14.28
 3 1 8 77.24 1.87
 3 1 9 266.36 7.23
 3 1 10 1.98 0.3
 3 1 11 58.32 1.48
 3 1 12 0.54 0.28
 3 1 13 38.81 1.1
 3 1 14 1.99 0.36
 3 1 15 23.22 0.63
 3 1 16 3.87 0.59
 3 1 17 4.06 0.43
 3 2 -19 8.48 0.35
 3 2 -18 -0.26 0.27
 3 2 -17 9.82 0.38
 3 2 -16 6.99 0.39
 3 2 -15 38.05 0.86
 3 2 -14 38.93 1.04
 3 2 -13 5.87 0.32
 3 2 -12 42.94 1.7
 3 2 -11 222.84 5.48
 3 2 -10 180.02 4.47
 3 2 -9 384.55 7.54
 3 2 -8 145.54 3.15
 3 2 -7 1141.54 21.56
 3 2 -6 329.71 8.66
 3 2 -5 1641.6 38.63
 3 2 -4 283.15 5.58
 3 2 -3 2062.88 40.73
 3 2 -2 219 5.51
 3 2 -1 917.63 17.27
 3 2 0 894.12 17.2
 3 2 1 284.46 6.6
 3 2 2 669.42 14.3
 3 2 3 359.73 9.17
 3 2 4 3.47 0.38
 3 2 5 1049.21 30.01
 3 2 6 48.42 1.85
 3 2 7 714.34 15.42
 3 2 8 17.4 0.83
 3 2 9 243.1 5.33
 3 2 10 0.49 0.46
 3 2 11 0.83 0.28
 3 2 12 36.02 1.21
 3 2 13 37.48 0.95
 3 2 14 36.22 1.03
 3 2 15 19.48 0.7
 3 2 16 17 0.6
 3 2 17 4.01 0.4
 3 3 -20 0.03 0.41
 3 3 -19 1.01 0.3
 3 3 -18 8.77 0.74
 3 3 -17 2.46 0.44
 3 3 -16 14.16 0.55
 3 3 -15 0.88 0.2
 3 3 -14 80.53 2.04
 3 3 -13 26.33 0.66
 3 3 -12 172.99 5.86
 3 3 -11 36.4 0.79
 3 3 -10 224.14 6.1
 3 3 -9 21.5 0.56
 3 3 -8 302.83 11.76
 3 3 -7 73.4 2.22
 3 3 -6 410.7 7.72
 3 3 -5 1128 19.68
 3 3 -3 0.56 0.19
 3 3 -2 2331.74 39.78
 3 3 -1 1262.56 22.38
 3 3 0 2492.32 42.08
 3 3 1 770.55 17.78
 3 3 2 1704.2 31.18
 3 3 3 1.12 0.29
 3 3 4 621.69 12.8
 3 3 5 28.15 0.97
 3 3 6 637.36 12.83
 3 3 7 3.35 0.33
 3 3 8 287.54 6.4
 3 3 9 26.9 0.83
 3 3 10 186.39 4.34
 3 3 11 64.7 1.67
 3 3 12 30.21 1.16
 3 3 13 0.78 0.4
 3 3 14 2.8 0.41
 3 3 15 0.84 0.3
 3 3 16 0.9 0.36
 3 3 17 0.32 0.35
 3 4 -19 10.08 0.53
 3 4 -18 9.68 0.73
 3 4 -17 16.61 0.58
 3 4 -16 19.09 0.78
 3 4 -15 15.36 0.46
 3 4 -14 58.26 1.36
 3 4 -13 43.08 0.85
 3 4 -12 12.79 0.54
 3 4 -11 149.41 4.04
 3 4 -10 171.23 3.86
 3 4 -9 94.56 2.09
 3 4 -8 234.02 6.68
 3 4 -7 245.74 5.46
 3 4 -6 132.19 2.87
 3 4 -5 1597.98 27.23
 3 4 -4 69.48 2.2
 3 4 -3 2097.08 40.92
 3 4 -2 70.17 1.59
 3 4 -1 1165.45 28.26
 3 4 0 1.31 0.23
 3 4 1 251.22 6.22
 3 4 2 270.43 5.44
 3 4 3 427.06 9.99
 3 4 4 123.67 3.16
 3 4 5 7.47 0.43
 3 4 6 0.46 0.27
 3 4 7 24.23 1.03
 3 4 8 8.12 0.5
 3 4 9 111.19 2.38
 3 4 10 40.47 0.99
 3 4 11 80.88 1.68
 3 4 12 277.69 7.41
 3 4 13 21.32 0.62
 3 4 14 28.8 1.09
 3 4 15 0.71 0.27
 3 4 16 4.49 0.7
 3 4 17 0.68 0.41
 3 5 -19 3.59 0.36
 3 5 -18 0.33 0.38
 3 5 -17 26.39 1
 3 5 -16 13.62 0.56
 3 5 -15 55.4 1.72
 3 5 -14 4.27 0.42
 3 5 -13 19.19 0.6
 3 5 -12 10.37 0.64
 3 5 -11 1.31 0.24
 3 5 -10 106.41 2.61
 3 5 -9 36.64 0.99
 3 5 -8 102.79 4.22
 3 5 -7 364.69 6.87
 3 5 -6 173.52 3.37
 3 5 -5 80.05 3.47
 3 5 -4 67.9 1.48
 3 5 -3 64.4 1.41
 3 5 -2 26.1 0.67
 3 5 -1 33.32 0.94
 3 5 0 73.54 1.69
 3 5 1 12.02 0.42
 3 5 2 307.19 5.57
 3 5 3 25.27 0.83
 3 5 4 42.67 1.06
 3 5 5 196.78 4.07
 3 5 6 2.3 0.39
 3 5 7 15.14 0.68
 3 5 8 -0.02 0.28
 3 5 9 54.87 1.46
 3 5 10 0.38 0.29
 3 5 11 118.05 3.32
 3 5 12 3.59 0.52
 3 5 13 140.58 4.41
 3 5 14 14.69 0.65
 3 5 15 28.4 1.5
 3 5 16 2.34 0.41
 3 6 -18 18.32 0.9
 3 6 -17 -0.22 0.37
 3 6 -16 43.47 1.14
 3 6 -15 2.98 0.3
 3 6 -14 30.53 1.02
 3 6 -13 2.15 0.33
 3 6 -12 69.46 2.14
 3 6 -11 42.37 1.4
 3 6 -10 57.68 1.45
 3 6 -9 18.4 0.56
 3 6 -8 124.44 2.43
 3 6 -7 20.38 0.79
 3 6 -6 12.37 0.43
 3 6 -5 49.38 1.18
 3 6 -4 9.25 0.38
 3 6 -3 26.17 0.68
 3 6 -2 2.48 0.41
 3 6 -1 0.27 0.28
 3 6 0 29.88 1.07
 3 6 1 38.28 0.9
 3 6 2 112.17 2.26
 3 6 3 15.71 0.48
 3 6 4 36.71 0.94
 3 6 5 17.98 0.52
 3 6 6 67.86 1.46
 3 6 7 17.1 0.63
 3 6 8 70.99 1.67
 3 6 9 87.55 2.34
 3 6 10 50.56 1.51
 3 6 11 11.38 0.7
 3 6 12 11.13 0.56
 3 6 13 21.61 0.76
 3 6 14 7.21 0.46
 3 6 15 1.08 0.72
 3 6 16 6.64 0.46
 3 7 -17 4.97 0.83
 3 7 -16 49.32 1.93
 3 7 -15 39.93 1.17
 3 7 -14 84.78 2.22
 3 7 -13 32.8 1.03
 3 7 -12 54.61 1.35
 3 7 -11 4.07 0.34
 3 7 -10 20.05 0.77
 3 7 -9 10.25 0.48
 3 7 -8 71 1.4
 3 7 -7 58.3 1.98
 3 7 -6 64.98 1.28
 3 7 -5 44.76 1.27
 3 7 -4 99.15 1.93
 3 7 -3 3.5 0.33
 3 7 -2 89.2 1.71
 3 7 -1 39.92 0.99
 3 7 0 186.11 3.38
 3 7 1 28.78 0.71
 3 7 2 210.63 3.78
 3 7 3 9.85 0.44
 3 7 4 78.49 1.86
 3 7 5 15.09 0.48
 3 7 6 102.01 2.05
 3 7 7 74.62 1.65
 3 7 8 53.14 1.71
 3 7 9 55.08 1.39
 3 7 10 6.63 0.46
 3 7 11 28.05 0.78
 3 7 12 0.31 0.29
 3 7 13 12.51 1.16
 3 7 14 3.59 0.54
 3 7 15 4.07 0.46
 3 8 -17 5.07 0.89
 3 8 -16 1.29 0.3
 3 8 -15 5.27 0.43
 3 8 -14 4.43 0.45
 3 8 -13 30.82 0.98
 3 8 -12 3.53 0.32
 3 8 -11 80.56 1.72
 3 8 -10 1.56 0.34
 3 8 -9 190.93 4.84
 3 8 -8 4.47 0.29
 3 8 -7 81.92 1.71
 3 8 -6 10.87 0.48
 3 8 -5 173.66 3.17
 3 8 -4 9.62 0.37
 3 8 -3 80.07 1.6
 3 8 -2 8.9 0.38
 3 8 -1 127.99 2.64
 3 8 0 3.25 0.33
 3 8 1 201.32 4.01
 3 8 2 3.04 0.33
 3 8 3 107.13 2.3
 3 8 4 -0.52 0.29
 3 8 5 29.97 0.74
 3 8 6 9 0.43
 3 8 7 62.78 1.72
 3 8 8 2.12 0.34
 3 8 9 77.38 1.95
 3 8 10 9.09 0.51
 3 8 11 49.15 1.59
 3 8 12 1.57 0.44
 3 8 13 4.38 0.36
 3 8 14 3.6 0.46
 3 9 -16 3.2 0.62
 3 9 -15 -0.65 0.35
 3 9 -14 18.73 0.66
 3 9 -13 -0.63 0.35
 3 9 -12 9.48 0.45
 3 9 -11 3.45 0.35
 3 9 -10 17.58 0.72
 3 9 -9 1.8 0.29
 3 9 -8 9.97 0.44
 3 9 -6 63.79 1.48
 3 9 -5 35.22 0.82
 3 9 -4 54.73 1.15
 3 9 -3 19.88 0.58
 3 9 -1 1.32 0.36
 3 9 0 118.65 3.27
 3 9 1 4.66 0.34
 3 9 3 0.35 0.28
 3 9 4 121.45 2.64
 3 9 5 4.41 0.39
 3 9 6 70 1.46
 3 9 7 5.42 0.4
 3 9 8 62.22 1.8
 3 9 9 1.94 0.37
 3 9 10 34.68 0.98
 3 9 11 1.13 0.29
 3 9 12 3.43 0.38
 3 9 13 2.85 0.29
 3 10 -14 6.38 0.45
 3 10 -13 14.82 0.59
 3 10 -12 11.06 0.54
 3 10 -11 18.76 0.65
 3 10 -10 11.07 0.45
 3 10 -9 26.06 0.68
 3 10 -8 12.47 0.5
 3 10 -7 47.95 1.1
 3 10 -6 4.59 0.36
 3 10 -5 19.14 0.66
 3 10 -4 4.82 0.4
 3 10 -3 5.97 0.45
 3 10 -2 10.46 0.49
 3 10 -1 1.93 0.39
 3 10 0 18.19 0.57
 3 10 1 28.26 0.73
 3 10 2 5.13 0.35
 3 10 3 34.29 0.81
 3 10 4 2.17 0.42
 3 10 5 1.2 0.31
 3 10 6 5.8 0.39
 3 10 7 10.33 0.41
 3 10 8 12.42 0.56
 3 10 9 11.42 0.48
 3 10 10 6.87 0.46
 3 10 11 2.88 0.37
 3 10 12 2.84 0.35
 3 11 -13 10.03 0.58
 3 11 -12 1.44 0.44
 3 11 -11 -0.14 0.37
 3 11 -10 0.53 0.34
 3 11 -8 0.92 0.32
 3 11 -7 9.97 0.51
 3 11 -6 0.1 0.29
 3 11 -5 24.37 0.96
 3 11 -4 0.61 0.29
 3 11 -3 4.61 0.36
 3 11 -2 3.79 0.37
 3 11 -1 0.11 0.29
 3 11 0 0.5 0.32
 3 11 1 3.27 0.32
 3 11 2 2.45 0.31
 3 11 3 0.04 0.28
 3 11 4 2.52 0.33
 3 11 5 9.47 0.5
 3 11 6 -0.49 0.37
 3 11 7 12.46 0.55
 3 11 8 0.67 0.33
 3 11 9 14.54 0.59
 3 11 10 0.05 0.38
 3 12 -11 1.82 0.62
 3 12 -10 0.25 0.29
 3 12 -9 1.57 0.32
 3 12 -8 -0.14 0.33
 3 12 -7 3.98 0.35
 3 12 -6 0.64 0.59
 3 12 -5 7.77 0.39
 3 12 -4 -0.1 0.31
 3 12 -3 6.3 0.42
 3 12 -2 1 0.33
 3 12 -1 12.64 0.46
 3 12 0 0.1 0.36
 3 12 1 0.51 0.33
 3 12 2 2.47 0.4
 3 12 3 1.33 0.32
 3 12 4 -0.1 0.48
 3 12 5 0.06 0.42
 3 12 6 6 0.37
 3 12 7 0.43 0.32
 3 12 8 4.93 0.36
 3 13 -8 3.72 0.43
 3 13 -7 1.53 0.41
 3 13 -6 3.02 0.37
 3 13 -5 0.6 0.43
 3 13 -4 1.62 0.34
 3 13 -3 -0.38 0.31
 3 13 -2 0.77 0.36
 3 13 -1 -0.19 0.31
 3 13 0 3.25 0.3
 3 13 1 0.04 0.24
 3 13 2 15.86 0.59
 3 13 3 0.02 0.48
 3 13 4 12.89 0.7
 3 13 5 0.4 0.42
 4 0 -6 532.53 17.69
 4 0 -5 -0.13 0.2
 4 0 -4 492.77 12.74
 4 0 -3 -0.35 0.18
 4 0 -2 668.33 26.47
 4 0 0 1457.69 41.89
 4 0 1 1.74 0.49
 4 0 2 58.07 2.75
 4 0 3 0.33 0.36
 4 0 4 209.08 11.35
 4 0 5 0.42 0.52
 4 0 6 329.7 9.36
 4 0 7 -1.17 0.51
 4 0 8 263.19 7.26
 4 0 9 0.6 0.36
 4 0 10 362.03 12.62
 4 0 11 0.32 0.44
 4 0 12 187.08 7.42
 4 0 13 -0.04 0.4
 4 0 14 78.78 2.51
 4 0 15 -0.38 0.43
 4 0 16 3.61 0.47
 4 1 -6 456.73 11.27
 4 1 -5 45.56 1.56
 4 1 -4 325.97 8.95
 4 1 -3 7.91 0.52
 4 1 -2 380.43 11.2
 4 1 -1 251.52 6.91
 4 1 0 202.4 5.84
 4 1 1 507.18 10.72
 4 1 2 68.21 2.61
 4 1 3 1582.72 32.45
 4 1 4 70.62 2.8
 4 1 5 1602.34 38.25
 4 1 6 48.17 1.29
 4 1 7 757.41 15.96
 4 1 8 183.79 4.31
 4 1 9 34.21 1.01
 4 1 10 13.03 0.47
 4 1 11 166.09 2.96
 4 1 12 3.37 0.35
 4 1 13 117.94 2.63
 4 1 14 0.89 0.39
 4 1 15 32.5 0.95
 4 1 16 1.4 0.34
 4 1 17 2.25 0.48
 4 2 -14 67.87 2.25
 4 2 -13 220.44 6.98
 4 2 -11 398.61 12.87
 4 2 -10 36 1.29
 4 2 -9 539.01 8.77
 4 2 -8 75 1.44
 4 2 -7 206.09 3.76
 4 2 -6 97.26 2.42
 4 2 -5 1666.59 32.71
 4 2 -4 85.53 2.08
 4 2 -3 1045.23 22.62
 4 2 -2 326.55 8.02
 4 2 -1 264.85 6.75
 4 2 0 120.02 3.13
 4 2 1 543.17 12.16
 4 2 2 2.83 0.34
 4 2 3 248.06 7.12
 4 2 4 306.15 7.58
 4 2 5 240.41 5.34
 4 2 6 593.83 15.04
 4 2 7 133.67 3.25
 4 2 8 223.58 4.89
 4 2 9 42.76 1.23
 4 2 11 8.98 0.41
 4 2 12 53.66 1.41
 4 2 13 1.53 0.41
 4 2 14 18.16 0.58
 4 2 15 -0.4 0.3
 4 2 16 0.63 0.31
 4 2 17 5.26 0.38
 4 3 -18 33.71 1.28
 4 3 -16 42.72 1.6
 4 3 -15 15.08 0.5
 4 3 -14 79.89 2.7
 4 3 -13 4.63 0.27
 4 3 -12 516.76 11.68
 4 3 -11 3.66 0.29
 4 3 -10 365.92 7.21
 4 3 -9 11.74 0.39
 4 3 -8 282.24 5.22
 4 3 -7 32.87 0.83
 4 3 -6 481.22 10.1
 4 3 -5 147.24 3.77
 4 3 -4 2012.72 33.81
 4 3 -3 3 0.24
 4 3 -2 1658.94 29.12
 4 3 -1 79.02 2.02
 4 3 0 1029.6 23.2
 4 3 1 3.79 0.31
 4 3 2 850.54 17.27
 4 3 3 192.21 4.67
 4 3 4 295.5 6.47
 4 3 5 35.8 1.15
 4 3 6 64.25 2.58
 4 3 7 5.81 0.48
 4 3 8 5.07 0.43
 4 3 9 0.31 0.29
 4 3 10 28.1 0.8
 4 3 11 80.42 2.05
 4 3 12 1.52 0.34
 4 3 13 9.86 0.44
 4 3 14 3.93 0.32
 4 3 15 -0.17 0.42
 4 3 16 1.05 0.32
 4 4 -19 18.45 0.93
 4 4 -18 6.94 0.32
 4 4 -17 40.59 1.58
 4 4 -16 20.37 0.56
 4 4 -15 47.62 1.31
 4 4 -14 5.8 0.43
 4 4 -13 38.34 1.18
 4 4 -12 145.85 5.61
 4 4 -11 189.81 3.46
 4 4 -10 40.07 0.95
 4 4 -9 181.91 4.73
 4 4 -8 6.41 0.29
 4 4 -7 325.9 6.14
 4 4 -6 976.83 16.74
 4 4 -5 424.34 8.11
 4 4 -4 507.97 10.5
 4 4 -3 349.94 6.66
 4 4 -2 261.8 5.14
 4 4 -1 309.63 6.55
 4 4 0 148.57 3.24
 4 4 1 299.69 7.1
 4 4 2 263.72 6.55
 4 4 3 124.3 3.72
 4 4 4 191.31 4.35
 4 4 5 90.04 3.22
 4 4 6 37.92 1.31
 4 4 7 8.29 0.46
 4 4 8 65.73 1.56
 4 4 9 3.44 0.31
 4 4 10 31.39 0.98
 4 4 11 1.35 0.42
 4 4 12 27.94 0.79
 4 4 13 6.77 0.63
 4 4 14 19.97 0.72
 4 4 15 1 0.34
 4 4 16 3.47 0.48
 4 5 -19 6.15 0.44
 4 5 -18 9.99 0.43
 4 5 -17 21.4 0.79
 4 5 -16 14.95 0.57
 4 5 -15 4.15 0.26
 4 5 -14 18.1 0.49
 4 5 -13 18.26 0.57
 4 5 -12 6.03 0.31
 4 5 -11 1.6 0.3
 4 5 -10 2.08 0.33
 4 5 -9 -0.09 0.45
 4 5 -8 36.15 1.01
 4 5 -7 31.16 0.85
 4 5 -6 30.79 0.94
 4 5 -5 37.16 1.01
 4 5 -4 28.06 0.87
 4 5 -3 0.83 0.31
 4 5 -2 109.51 2.71
 4 5 -1 85.16 1.85
 4 5 0 185.55 4.33
 4 5 1 667.77 12.1
 4 5 2 209.21 4.24
 4 5 3 325.33 6.35
 4 5 4 3.53 0.49
 4 5 5 244.92 5.53
 4 5 6 0.85 0.35
 4 5 7 235.18 4.55
 4 5 8 8.42 0.49
 4 5 9 150.95 3.03
 4 5 10 49.75 1.15
 4 5 11 138.53 3.62
 4 5 12 1.15 0.36
 4 5 13 34.08 0.95
 4 5 14 -0.07 0.5
 4 5 15 33.4 1.11
 4 6 -18 2.2 0.64
 4 6 -17 0.45 0.39
 4 6 -15 3.26 0.29
 4 6 -14 56.13 2.15
 4 6 -13 31.38 0.86
 4 6 -12 42.62 1.38
 4 6 -11 26.49 0.83
 4 6 -10 10.77 0.76
 4 6 -9 16.91 0.61
 4 6 -8 10.53 0.43
 4 6 -7 13.18 0.45
 4 6 -6 59.68 1.79
 4 6 -5 14.1 0.45
 4 6 -4 85.81 1.71
 4 6 -3 14.66 0.45
 4 6 -2 97.15 1.92
 4 6 -1 45.95 1.05
 4 6 0 543.42 13.06
 4 6 1 12.84 0.42
 4 6 2 184 3.86
 4 6 3 13.78 0.48
 4 6 4 102.44 2.09
 4 6 5 29.54 0.91
 4 6 6 31.16 0.88
 4 6 7 25.6 0.84
 4 6 8 28.74 0.76
 4 6 9 15.2 0.53
 4 6 10 66.2 1.71
 4 6 11 1.22 0.29
 4 6 12 74.33 1.9
 4 6 13 1.47 0.38
 4 6 14 31.82 1.75
 4 6 15 -0.3 0.59
 4 7 -17 8.56 0.63
 4 7 -16 60.43 2.04
 4 7 -15 1.58 0.35
 4 7 -14 30.72 0.9
 4 7 -13 0.69 0.3
 4 7 -12 70.5 1.55
 4 7 -11 3.93 0.34
 4 7 -10 30.55 0.77
 4 7 -9 9.82 0.46
 4 7 -8 11.27 0.51
 4 7 -7 42.56 1.01
 4 7 -6 125.07 2.25
 4 7 -5 17.69 0.5
 4 7 -4 133.99 2.79
 4 7 -3 36.1 0.87
 4 7 -2 178.54 3.83
 4 7 -1 53.16 1.19
 4 7 0 88.35 2.04
 4 7 1 111.84 2.1
 4 7 2 27.59 0.66
 4 7 3 46.65 1.03
 4 7 4 0.57 0.26
 4 7 5 42.16 0.97
 4 7 6 11.8 0.49
 4 7 7 79.41 1.63
 4 7 8 5.71 0.4
 4 7 9 117.2 2.47
 4 7 10 7.2 0.52
 4 7 11 23.78 0.92
 4 7 12 12.63 0.62
 4 7 13 9.01 0.47
 4 7 14 2.13 0.41
 4 8 -16 1.93 0.33
 4 8 -14 13.34 0.52
 4 8 -13 69.37 1.79
 4 8 -12 9.93 0.43
 4 8 -11 39.25 0.98
 4 8 -10 29.62 0.75
 4 8 -9 101.64 2.22
 4 8 -8 4.96 0.32
 4 8 -7 173.03 3.54
 4 8 -6 15.01 0.47
 4 8 -5 177 3.21
 4 8 -4 3.33 0.34
 4 8 -3 61.89 1.33
 4 8 -2 0.98 0.31
 4 8 -1 15.26 0.51
 4 8 0 1.78 0.3
 4 8 1 75.73 1.68
 4 8 2 7.81 0.39
 4 8 3 2.53 0.35
 4 8 4 -0.29 0.31
 4 8 5 8.96 0.4
 4 8 6 14.85 0.48
 4 8 7 52.27 1.24
 4 8 8 39.38 1.23
 4 8 9 20.77 0.75
 4 8 10 15.76 0.69
 4 8 11 0.11 0.28
 4 8 12 0.56 0.3
 4 8 13 1.71 0.37
 4 9 -16 2.74 0.53
 4 9 -15 -0.06 0.45
 4 9 -14 11.62 0.61
 4 9 -13 7.22 0.44
 4 9 -12 22.65 0.92
 4 9 -11 1.17 0.29
 4 9 -9 11.16 0.48
 4 9 -7 7.51 0.5
 4 9 -6 109.92 4.13
 4 9 -5 25.15 0.76
 4 9 -4 15.79 0.61
 4 9 -3 4.58 0.34
 4 9 -1 8.95 0.38
 4 9 1 31.61 0.78
 4 9 2 126.16 3.49
 4 9 3 25.07 0.66
 4 9 4 8.63 0.41
 4 9 5 5.47 0.33
 4 9 6 6.52 0.46
 4 9 7 8.8 0.41
 4 9 8 1.5 0.28
 4 9 9 0.32 0.36
 4 9 10 0.34 0.31
 4 9 11 2.78 0.33
 4 9 12 1.79 0.29
 4 10 -14 7.95 0.44
 4 10 -13 7.87 0.44
 4 10 -12 7.8 0.42
 4 10 -11 45.78 2.25
 4 10 -10 1.18 0.27
 4 10 -9 18.85 0.57
 4 10 -8 11.13 0.45
 4 10 -7 27.03 0.8
 4 10 -6 16.26 0.6
 4 10 -5 18.21 0.71
 4 10 -4 11.24 0.52
 4 10 -3 1.08 0.29
 4 10 -2 6.49 0.39
 4 10 -1 0.19 0.34
 4 10 0 20.94 0.55
 4 10 1 0.59 0.31
 4 10 2 6.43 0.52
 4 10 3 15.84 0.6
 4 10 4 23.13 0.76
 4 10 5 2.78 0.41
 4 10 6 27.71 0.78
 4 10 7 3.42 0.34
 4 10 8 18.81 0.62
 4 10 9 3.43 0.34
 4 10 10 7.13 0.41
 4 10 11 0.22 0.34
 4 11 -12 0.39 0.3
 4 11 -11 4.69 0.55
 4 11 -10 0.22 0.63
 4 11 -9 6.21 0.56
 4 11 -8 3 0.32
 4 11 -7 8.07 0.39
 4 11 -6 1.15 0.36
 4 11 -5 2.75 0.37
 4 11 -4 2.19 0.37
 4 11 -3 12.61 0.49
 4 11 -2 2.97 0.33
 4 11 -1 17.9 0.54
 4 11 0 -0.09 0.35
 4 11 1 8.37 0.52
 4 11 2 1.58 0.45
 4 11 3 -0.16 0.3
 4 11 4 -0.44 0.33
 4 11 6 2.34 0.34
 4 11 8 0.17 0.31
 4 11 9 11.27 0.49
 4 12 -10 0.56 0.31
 4 12 -9 4.83 0.52
 4 12 -8 1.27 0.32
 4 12 -7 5.05 0.38
 4 12 -6 1.64 0.36
 4 12 -5 3.28 0.38
 4 12 -4 1.61 0.29
 4 12 -3 0.13 0.37
 4 12 -2 7.26 0.42
 4 12 -1 0.02 0.28
 4 12 0 4.79 0.44
 4 12 1 1.23 0.35
 4 12 2 2.5 0.47
 4 12 3 4.84 0.34
 4 12 4 0.25 0.37
 4 12 5 4.01 0.35
 4 12 6 12.3 0.53
 4 12 7 0.54 0.38
 4 13 -7 0.88 0.59
 4 13 -6 2.92 0.42
 4 13 -5 -0.06 0.36
 4 13 -4 3.55 0.31
 4 13 -3 1.55 0.57
 4 13 -2 5.13 0.43
 4 13 -1 5.49 0.35
 4 13 0 4.68 0.35
 4 13 1 0.87 0.55
 4 13 2 7.86 0.4
 4 13 3 1.93 0.64
 5 0 -7 0.42 0.18
 5 0 -6 780.48 27.02
 5 0 -5 0.14 0.32
 5 0 -4 1215.26 43.61
 5 0 -3 0.69 0.26
 5 0 -2 22.37 1.66
 5 0 0 573.44 18.27
 5 0 1 2.42 0.53
 5 0 2 189.63 6.69
 5 0 3 0.4 0.44
 5 0 4 1230.93 32.24
 5 0 5 0.13 0.35
 5 0 6 1294.03 31.97
 5 0 7 -0.18 0.56
 5 0 8 9.01 0.65
 5 0 10 301.55 7.74
 5 0 11 -0.57 0.42
 5 0 15 0.15 0.46
 5 1 -8 3.01 0.25
 5 1 -7 225.79 5.68
 5 1 -6 130.81 4.96
 5 1 -5 374.63 9.98
 5 1 -4 58.02 3.26
 5 1 -3 757.46 14.82
 5 1 -2 93.7 2.58
 5 1 -1 1176.36 26.57
 5 1 0 110.57 3.37
 5 1 1 343.86 12.19
 5 1 2 27.19 1.38
 5 1 3 934.25 20.47
 5 1 4 61.1 2.64
 5 1 5 625.32 11.92
 5 1 6 7.12 0.39
 5 1 7 181.85 4.24
 5 1 8 3 0.36
 5 1 9 117.85 2.25
 5 1 10 9.09 0.39
 5 1 11 167.8 3.08
 5 1 12 3.24 0.37
 5 1 13 99.92 2.84
 5 1 14 2.63 0.38
 5 1 15 3.04 0.35
 5 1 16 14.22 0.58
 5 2 -9 143.59 4.87
 5 2 -8 69.77 1.56
 5 2 -7 130.76 3.46
 5 2 -6 54.88 1.32
 5 2 -5 190.32 4.68
 5 2 -4 15.19 0.67
 5 2 -3 112.67 3.16
 5 2 -2 211.5 7.11
 5 2 -1 62.29 2.67
 5 2 0 128.66 4.58
 5 2 1 9.42 0.59
 5 2 2 45.09 1.81
 5 2 3 63.93 2.68
 5 2 4 290.66 6.48
 5 2 5 15.56 0.64
 5 2 6 206.05 4.64
 5 2 7 105.58 2.31
 5 2 8 141.78 2.72
 5 2 9 93.78 2.19
 5 2 10 11.56 0.66
 5 2 11 31.96 0.93
 5 2 12 0.52 0.3
 5 2 13 24.94 0.78
 5 2 14 0.21 0.36
 5 2 15 6.5 0.49
 5 2 16 0.36 0.4
 5 3 -14 164.67 5.34
 5 3 -12 223.29 5.07
 5 3 -11 29.64 0.69
 5 3 -10 159.65 2.81
 5 3 -9 100.4 2.01
 5 3 -8 119.61 3.4
 5 3 -7 85.6 2.18
 5 3 -6 258.88 5.89
 5 3 -5 101.25 2.69
 5 3 -4 366.58 7.4
 5 3 -3 2.02 0.24
 5 3 -2 261.92 5.76
 5 3 -1 66.44 1.83
 5 3 0 121.16 2.99
 5 3 1 56.71 2.41
 5 3 2 5.35 0.37
 5 3 3 74.04 2.06
 5 3 4 46.56 1.36
 5 3 5 2.59 0.3
 5 3 6 23.6 0.93
 5 3 7 30.9 0.87
 5 3 8 67.28 1.47
 5 3 9 17.13 0.81
 5 3 10 120.51 2.97
 5 3 11 4.66 0.35
 5 3 12 16.01 0.55
 5 3 13 -0.18 0.5
 5 3 14 -0.09 0.29
 5 3 15 0.58 0.36
 5 4 -15 58.48 1.56
 5 4 -14 38.15 1.1
 5 4 -13 97.85 2.49
 5 4 -12 41.36 1.53
 5 4 -11 155.32 3.3
 5 4 -10 35.42 0.95
 5 4 -9 14.41 0.52
 5 4 -8 319.06 5.76
 5 4 -7 20.62 0.64
 5 4 -6 651.35 11.35
 5 4 -5 54.59 1.28
 5 4 -4 132.84 2.7
 5 4 -3 12.16 0.47
 5 4 -2 197.26 4.74
 5 4 -1 63.96 1.71
 5 4 0 321.94 8.44
 5 4 1 168.33 3.7
 5 4 2 444.27 10.08
 5 4 3 0 0.26
 5 4 4 79.75 2.05
 5 4 5 5.7 0.41
 5 4 6 76.82 1.87
 5 4 7 4.55 0.33
 5 4 8 8.36 0.4
 5 4 9 0.39 0.35
 5 4 10 30.19 1
 5 4 11 5.58 0.38
 5 4 12 1.89 0.36
 5 4 13 6.26 0.37
 5 4 14 7.65 0.61
 5 4 15 8.51 0.36
 5 5 -18 2.45 0.49
 5 5 -17 2.63 0.57
 5 5 -15 23.53 0.85
 5 5 -14 1.29 0.25
 5 5 -13 33.78 0.79
 5 5 -12 7.5 0.45
 5 5 -11 5.98 0.34
 5 5 -10 2.87 0.54
 5 5 -9 27.74 0.67
 5 5 -8 13.74 0.53
 5 5 -7 135.8 2.53
 5 5 -6 51.33 1.18
 5 5 -5 129.66 2.72
 5 5 -4 6.16 0.39
 5 5 -3 171.79 3.34
 5 5 -2 -0.07 0.28
 5 5 -1 813.39 14.39
 5 5 0 78.49 1.91
 5 5 1 1032.47 20.4
 5 5 2 77.95 1.95
 5 5 3 754.03 18.95
 5 5 4 18.16 0.55
 5 5 5 432.03 16.12
 5 5 6 2.36 0.45
 5 5 7 211.31 4.09
 5 5 8 -0.17 0.31
 5 5 9 59.45 1.47
 5 5 10 -0.22 0.31
 5 5 11 23.49 0.95
 5 5 12 5.11 0.54
 5 5 13 8.87 0.5
 5 5 14 4.33 0.44
 5 5 15 4.06 0.42
 5 6 -17 3.99 0.44
 5 6 -16 5.21 0.61
 5 6 -14 27.07 0.85
 5 6 -13 3.25 0.28
 5 6 -12 44.77 1.32
 5 6 -11 4.97 0.3
 5 6 -10 26.28 0.77
 5 6 -9 5.22 0.41
 5 6 -8 231.59 4.17
 5 6 -7 1.03 0.34
 5 6 -6 119.06 2.33
 5 6 -5 31.45 0.74
 5 6 -4 101.34 2.28
 5 6 -3 54.45 1.39
 5 6 -2 168.35 3.67
 5 6 -1 58.15 1.77
 5 6 0 549.88 10.65
 5 6 1 0.26 0.25
 5 6 2 144.02 2.58
 5 6 3 1.82 0.32
 5 6 4 65.49 2.09
 5 6 5 -0.34 0.29
 5 6 6 144.51 3.83
 5 6 7 0.22 0.28
 5 6 8 172.07 3.63
 5 6 9 47.77 1.42
 5 6 10 97.51 2.21
 5 6 11 8.14 0.47
 5 6 12 49.23 1.53
 5 6 13 0.04 0.34
 5 6 14 12.02 0.83
 5 7 -17 1.76 0.33
 5 7 -16 5.51 0.46
 5 7 -15 0.56 0.37
 5 7 -14 24.18 0.83
 5 7 -13 3.05 0.29
 5 7 -12 39.73 1.54
 5 7 -11 6.14 0.36
 5 7 -10 50.36 1.28
 5 7 -9 34.61 0.95
 5 7 -8 17.37 0.58
 5 7 -7 72.4 1.63
 5 7 -6 33.33 0.92
 5 7 -5 43.58 0.94
 5 7 -4 73.66 1.44
 5 7 -3 67.5 1.29
 5 7 -2 95.03 1.75
 5 7 -1 232.65 4.2
 5 7 0 56.23 1.63
 5 7 1 114.45 2.17
 5 7 2 40.31 0.95
 5 7 3 72.17 1.47
 5 7 4 30.16 0.78
 5 7 5 63.47 1.34
 5 7 6 4.25 0.35
 5 7 7 47.6 1.42
 5 7 8 0.13 0.28
 5 7 9 16.64 0.7
 5 7 10 0.11 0.34
 5 7 11 5.03 0.48
 5 7 12 1.03 0.32
 5 7 13 5.69 0.44
 5 8 -16 0.84 0.4
 5 8 -15 8.98 0.6
 5 8 -14 3.12 0.35
 5 8 -13 42.44 1.17
 5 8 -12 3.99 0.32
 5 8 -11 56.86 1.17
 5 8 -10 1.05 0.33
 5 8 -9 35.67 0.96
 5 8 -8 1.71 0.33
 5 8 -7 101.11 2.16
 5 8 -6 9.88 0.4
 5 8 -5 18.72 0.89
 5 8 -4 14.23 0.56
 5 8 -3 11.43 0.49
 5 8 -2 51.32 1.11
 5 8 -1 1.99 0.31
 5 8 0 33.81 1.23
 5 8 1 45.92 1.18
 5 8 2 1.07 0.3
 5 8 3 1.78 0.27
 5 8 4 3.19 0.32
 5 8 5 14.92 0.56
 5 8 6 2.65 0.34
 5 8 7 12.67 0.57
 5 8 8 27.43 0.75
 5 8 9 8.43 0.49
 5 8 10 1.43 0.27
 5 8 11 2.22 0.42
 5 8 12 1.19 0.5
 5 9 -15 2 0.37
 5 9 -14 9.67 0.6
 5 9 -13 0.96 0.28
 5 9 -12 43.71 1.43
 5 9 -11 11.27 0.43
 5 9 -10 22.79 0.87
 5 9 -9 -0.36 0.24
 5 9 -7 0.44 0.33
 5 9 -6 94.78 2.24
 5 9 -5 7.55 0.37
 5 9 -4 43.43 0.98
 5 9 -3 13.19 0.47
 5 9 -2 7.54 0.41
 5 9 -1 19.53 0.61
 5 9 0 4.15 0.32
 5 9 1 2.11 0.3
 5 9 2 0.14 0.27
 5 9 3 73.15 1.88
 5 9 4 11.85 0.53
 5 9 5 23.07 0.75
 5 9 6 4.98 0.35
 5 9 7 -0.2 0.37
 5 9 8 1.69 0.38
 5 9 9 0.83 0.35
 5 9 10 7.54 0.53
 5 9 11 0.18 0.25
 5 10 -14 2.12 0.36
 5 10 -13 0.53 0.37
 5 10 -12 11.8 0.55
 5 10 -11 1.81 0.31
 5 10 -10 12 0.59
 5 10 -9 18.42 0.62
 5 10 -8 9.87 0.62
 5 10 -7 11.8 0.5
 5 10 -6 3.65 0.33
 5 10 -5 5.62 0.33
 5 10 -4 44.97 1.18
 5 10 -3 0.83 0.31
 5 10 -2 36.47 0.99
 5 10 -1 0.52 0.45
 5 10 0 42.41 1.14
 5 10 1 -0.09 0.35
 5 10 2 6.79 0.37
 5 10 3 2.76 0.32
 5 10 4 26.27 0.73
 5 10 5 6.61 0.54
 5 10 6 22.07 1.01
 5 10 7 0.09 0.34
 5 10 8 14.22 0.53
 5 10 9 1.84 0.42
 5 10 10 5.8 0.43
 5 11 -12 0.69 0.36
 5 11 -11 -0.06 0.5
 5 11 -10 1.76 0.43
 5 11 -9 7.19 0.38
 5 11 -8 3.21 0.31
 5 11 -7 14.41 0.53
 5 11 -6 0.55 0.28
 5 11 -5 19.01 0.59
 5 11 -4 0.02 0.38
 5 11 -3 26.39 0.8
 5 11 -2 0.63 0.3
 5 11 -1 32.58 1.65
 5 11 0 0.19 0.3
 5 11 1 26.46 0.76
 5 11 2 -0.62 0.34
 5 11 3 4.56 0.36
 5 11 4 1.55 0.37
 5 11 5 19.5 0.92
 5 11 6 0.25 0.33
 5 11 7 23.43 0.76
 5 11 8 1.14 0.27
 5 12 -9 1.4 0.44
 5 12 -8 4.29 0.32
 5 12 -7 0.65 0.31
 5 12 -6 6.59 0.42
 5 12 -5 0.57 0.28
 5 12 -4 4.87 0.36
 5 12 -3 -0.24 0.29
 5 12 -2 13.38 0.51
 5 12 -1 0.32 0.37
 5 12 0 11.54 0.69
 5 12 1 0.83 0.33
 5 12 2 4.94 0.37
 5 12 3 -0.31 0.3
 5 12 4 9.18 0.51
 5 12 5 1.1 0.42
 5 13 -6 2.91 0.4
 5 13 -5 2.75 0.44
 5 13 -4 1.17 0.35
 5 13 -3 5.28 0.35
 5 13 -2 0.21 0.33
 5 13 -1 2.08 0.36
 5 13 0 0.06 0.28
 5 13 1 0.19 0.41
 6 0 -8 689.09 22.02
 6 0 -7 0.98 0.34
 6 0 -6 708.68 17.98
 6 0 -5 -0.39 0.23
 6 0 -4 498.5 19.11
 6 0 -3 -0.19 0.38
 6 0 -2 561.93 16.24
 6 0 -1 0.46 0.43
 6 0 0 67.29 3.86
 6 0 1 1.07 0.53
 6 0 2 607.05 16.85
 6 0 3 1.2 0.54
 6 0 4 540.63 22.97
 6 0 5 -0.58 0.62
 6 0 6 422.99 16.33
 6 0 7 -0.15 0.36
 6 0 8 146.24 4.22
 6 0 9 0.26 0.65
 6 0 10 67.67 2.01
 6 0 11 0.03 0.39
 6 0 12 36.42 1.29
 6 0 13 -0.65 0.67
 6 0 14 -0.63 0.44
 6 0 15 0.19 0.62
 6 1 -9 262.67 8.24
 6 1 -8 3.36 0.2
 6 1 -7 975.1 22.76
 6 1 -6 3.27 0.32
 6 1 -5 1882.6 64.47
 6 1 -4 29.16 0.99
 6 1 -3 1475.62 37.93
 6 1 -2 7.25 0.42
 6 1 -1 126.11 3.97
 6 1 0 222.2 6.67
 6 1 1 142.25 4.32
 6 1 2 42.2 1.57
 6 1 3 261.4 6.22
 6 1 4 0.83 0.25
 6 1 5 346.79 7.72
 6 1 6 53.55 1.52
 6 1 7 2.29 0.32
 6 1 8 183.82 3.58
 6 1 9 63.84 1.58
 6 1 10 68.58 1.51
 6 1 11 41.82 1.19
 6 1 12 34.1 0.99
 6 1 13 6.96 0.42
 6 1 14 -0.23 0.41
 6 2 -10 145.78 4.76
 6 2 -9 5.19 0.33
 6 2 -8 66.08 3.09
 6 2 -7 11.66 0.38
 6 2 -6 252.42 5.79
 6 2 -5 1.42 0.27
 6 2 -4 126.22 3.41
 6 2 -3 201.82 8.91
 6 2 -2 49.2 1.65
 6 2 -1 36.98 2.14
 6 2 0 113.63 3.81
 6 2 1 88.64 2.61
 6 2 2 252.39 6.05
 6 2 3 5.05 0.44
 6 2 4 128.43 3.07
 6 2 5 53.35 1.61
 6 2 6 73.41 1.93
 6 2 7 153.08 3.03
 6 2 8 37.55 1.8
 6 2 9 211.97 4.56
 6 2 10 12.3 0.74
 6 2 11 112.01 2.72
 6 2 12 17.2 0.56
 6 2 13 16.53 0.79
 6 2 14 1.84 0.31
 6 2 15 15.12 0.51
 6 3 -11 6.84 0.31
 6 3 -10 6.64 0.36
 6 3 -9 1.08 0.2
 6 3 -8 13.29 0.42
 6 3 -7 36.73 0.88
 6 3 -6 8.17 0.4
 6 3 -5 31.98 1.18
 6 3 -4 78.76 2.16
 6 3 -3 24.24 0.82
 6 3 -2 19.87 0.87
 6 3 -1 4.85 0.33
 6 3 0 224.54 5.47
 6 3 1 47.17 2.31
 6 3 2 337.49 7.38
 6 3 3 31 1.03
 6 3 4 565.55 12.07
 6 3 5 143.91 2.99
 6 3 6 89.36 2.3
 6 3 7 4.44 0.36
 6 3 8 32.21 1.35
 6 3 9 1.26 0.32
 6 3 10 18.99 0.71
 6 3 11 7.18 0.45
 6 3 12 10.86 0.64
 6 3 13 3.24 0.32
 6 3 14 11.78 0.44
 6 4 -14 70.01 2.56
 6 4 -13 26.29 1.11
 6 4 -12 77.68 2.06
 6 4 -11 0.48 0.21
 6 4 -10 87.41 2.56
 6 4 -9 1.52 0.27
 6 4 -8 184.31 4.91
 6 4 -7 0.23 0.26
 6 4 -6 197.17 3.91
 6 4 -5 11.45 0.52
 6 4 -4 6.11 0.4
 6 4 -3 26.23 0.86
 6 4 -2 112.47 2.37
 6 4 -1 1.46 0.31
 6 4 0 78.56 1.93
 6 4 1 8.94 0.5
 6 4 2 97.09 2.55
 6 4 3 125.7 3.28
 6 4 4 81.16 1.92
 6 4 5 20.77 0.65
 6 4 6 35.64 0.91
 6 4 7 27.03 0.86
 6 4 8 31.67 0.97
 6 4 9 43.51 1.09
 6 4 10 12.6 0.5
 6 4 11 40.24 1.54
 6 4 12 7.5 0.5
 6 4 13 11.94 0.66
 6 4 14 0.75 0.36
 6 5 -16 3.27 0.49
 6 5 -15 46.45 1.42
 6 5 -14 6.08 0.38
 6 5 -13 70.09 1.71
 6 5 -12 14.26 0.64
 6 5 -11 28.4 0.69
 6 5 -10 4.56 0.26
 6 5 -9 253.83 4.49
 6 5 -8 29.76 0.82
 6 5 -7 296.46 5.31
 6 5 -6 10.12 0.65
 6 5 -5 144.54 3.13
 6 5 -4 0.83 0.29
 6 5 -3 339.66 5.97
 6 5 -2 35.19 0.93
 6 5 -1 597.98 10.98
 6 5 0 68.31 1.63
 6 5 1 803.19 13.85
 6 5 2 0.39 0.29
 6 5 3 255.92 4.9
 6 5 4 12.73 0.62
 6 5 5 166.57 3.2
 6 5 6 113.93 2.6
 6 5 7 35.86 0.94
 6 5 8 17.18 0.97
 6 5 9 9.39 0.5
 6 5 10 4.8 0.37
 6 5 11 4.27 0.53
 6 5 12 1.17 0.37
 6 5 13 1.2 0.33
 6 6 -18 5.23 0.57
 6 6 -17 0.51 0.56
 6 6 -16 22.28 0.88
 6 6 -15 2.21 0.36
 6 6 -14 42.16 1.05
 6 6 -13 0.52 0.27
 6 6 -12 74.87 1.61
 6 6 -11 7.4 0.33
 6 6 -10 150.37 2.73
 6 6 -9 2.78 0.28
 6 6 -8 230.27 4.02
 6 6 -7 20.82 0.55
 6 6 -6 58.81 1.21
 6 6 -5 7.69 0.78
 6 6 -4 68.39 1.38
 6 6 -3 27.15 0.71
 6 6 -2 195.87 5.29
 6 6 -1 107.8 2.08
 6 6 0 130.36 2.55
 6 6 1 1.48 0.32
 6 6 2 167.65 6.28
 6 6 3 13.64 0.51
 6 6 4 312.35 5.58
 6 6 5 19.73 0.69
 6 6 6 329.29 8.73
 6 6 7 44.9 1.67
 6 6 8 101.28 2.62
 6 6 9 19.04 0.7
 6 6 10 11.46 0.67
 6 6 11 7.34 0.4
 6 6 12 3.78 0.39
 6 6 13 -0.34 0.29
 6 7 -17 8.37 0.5
 6 7 -16 0.93 0.38
 6 7 -15 17.18 0.62
 6 7 -14 7.65 0.41
 6 7 -13 14.94 0.6
 6 7 -12 13.37 0.71
 6 7 -11 34.32 1.23
 6 7 -10 1.39 0.34
 6 7 -9 79.46 1.53
 6 7 -8 3.61 0.35
 6 7 -7 16.9 0.49
 6 7 -6 0.71 0.28
 6 7 -5 38.3 1.27
 6 7 -4 2 0.3
 6 7 -3 115.53 2.51
 6 7 -2 2.57 0.46
 6 7 -1 366.31 12.2
 6 7 0 -0.15 0.35
 6 7 1 15.73 0.49
 6 7 2 0.72 0.35
 6 7 3 7 0.37
 6 7 4 5.66 0.3
 6 7 5 14.26 0.63
 6 7 6 13.77 0.53
 6 7 7 46.14 1.53
 6 7 8 78.47 1.83
 6 7 9 7.95 0.42
 6 7 10 34.86 1.1
 6 7 11 0.49 0.29
 6 7 12 8.66 0.52
 6 8 -15 4.9 0.51
 6 8 -14 1.6 0.65
 6 8 -13 5.19 0.42
 6 8 -12 1.46 0.38
 6 8 -11 3.38 0.45
 6 8 -10 5.79 0.33
 6 8 -9 1.6 0.29
 6 8 -8 18.06 0.52
 6 8 -7 0.96 0.28
 6 8 -6 1.37 0.27
 6 8 -5 0.7 0.31
 6 8 -4 7.61 0.4
 6 8 -3 3.3 0.28
 6 8 -2 39.93 0.94
 6 8 -1 5.12 0.32
 6 8 0 63.2 1.36
 6 8 1 11 0.47
 6 8 2 3.37 0.33
 6 8 3 10.71 0.4
 6 8 4 6.42 0.4
 6 8 5 25.98 0.7
 6 8 6 0.43 0.38
 6 8 7 35.35 1.03
 6 8 8 1.88 0.3
 6 8 9 48.68 1.31
 6 8 10 1.04 0.33
 6 9 -15 1.06 0.66
 6 9 -14 0.4 0.41
 6 9 -13 2.17 0.65
 6 9 -12 33.88 1.75
 6 9 -11 7.69 0.39
 6 9 -10 6.41 0.44
 6 9 -9 11.38 0.42
 6 9 -8 18.24 0.54
 6 9 -7 3.2 0.3
 6 9 -6 3.54 0.32
 6 9 -5 18.04 0.59
 6 9 -4 0.12 0.3
 6 9 -3 3.74 0.36
 6 9 -2 8.21 0.4
 6 9 -1 18.25 0.57
 6 9 0 8.79 0.41
 6 9 1 5.42 0.42
 6 9 2 50.93 1.56
 6 9 3 2.55 0.34
 6 9 4 15.24 0.64
 6 9 5 9.27 0.41
 6 9 6 13.42 0.51
 6 9 7 0.93 0.36
 6 9 8 7.96 0.49
 6 9 9 2.18 0.35
 6 9 10 12.92 0.49
 6 10 -13 -0.11 0.36
 6 10 -12 11.57 0.78
 6 10 -11 0.24 0.36
 6 10 -10 11.6 0.57
 6 10 -9 1.4 0.33
 6 10 -8 16.85 0.59
 6 10 -7 4.81 0.39
 6 10 -6 14.14 0.56
 6 10 -5 0.92 0.31
 6 10 -4 17.53 0.55
 6 10 -3 -0.39 0.27
 6 10 -2 30.14 0.93
 6 10 -1 0.15 0.29
 6 10 0 19.79 0.6
 6 10 1 1 0.4
 6 10 2 15.65 0.57
 6 10 3 13.8 0.52
 6 10 4 10.94 0.57
 6 10 5 5.95 0.33
 6 10 6 4.94 0.36
 6 10 7 1.75 0.34
 6 11 -12 0.43 0.43
 6 11 -11 3.53 0.42
 6 11 -10 0.33 0.32
 6 11 -9 7.55 0.4
 6 11 -8 0.26 0.29
 6 11 -7 8.51 0.41
 6 11 -6 1.93 0.32
 6 11 -5 38.15 1.92
 6 11 -4 -0.1 0.31
 6 11 -3 32.09 1.13
 6 11 -2 1.11 0.3
 6 11 -1 31.49 0.96
 6 11 0 0.03 0.31
 6 11 1 15.74 0.56
 6 11 2 -0.55 0.33
 6 11 3 14.77 0.62
 6 11 4 2.76 0.37
 6 11 5 0.9 0.28
 6 11 6 0.77 0.36
 6 12 -9 0.5 0.34
 6 12 -8 3.71 0.29
 6 12 -7 -0.14 0.37
 6 12 -6 6.09 0.48
 6 12 -5 0.99 0.41
 6 12 -4 10.81 0.5
 6 12 -3 2.48 0.34
 6 12 -2 9.7 0.54
 6 12 -1 0.16 0.32
 6 12 0 11.84 0.54
 6 12 1 0.05 0.3
 6 12 2 3.53 0.4
 6 12 3 0.7 0.35
 7 0 -9 -0.03 0.23
 7 0 -8 236.95 8.43
 7 0 -7 0.18 0.45
 7 0 -6 703.1 18.07
 7 0 -5 0.36 0.37
 7 0 -4 1137.28 31.55
 7 0 -3 -0.2 0.33
 7 0 -2 417.49 13.03
 7 0 -1 0.55 0.41
 7 0 0 552.7 23.26
 7 0 1 1.14 0.56
 7 0 2 400.95 11.88
 7 0 3 -0.91 0.58
 7 0 4 160.97 5.17
 7 0 5 0.48 0.37
 7 0 6 31.26 1.3
 7 0 7 -0.17 0.42
 7 0 8 10.14 0.79
 7 0 9 -0.38 0.42
 7 0 10 2.31 0.44
 7 0 11 1.85 0.63
 7 0 12 0.77 0.43
 7 0 13 0.23 0.54
 7 0 14 11.13 0.96
 7 1 -9 274.3 6.65
 7 1 -8 5.74 0.36
 7 1 -7 839.34 16.65
 7 1 -6 0.53 0.24
 7 1 -5 582.17 15.53
 7 1 -4 25.17 1.35
 7 1 -3 387.42 9.38
 7 1 -2 71.57 2.83
 7 1 -1 78.16 2.76
 7 1 0 405.91 8.58
 7 1 1 175.23 4.32
 7 1 2 261.07 6.65
 7 1 3 76.65 2.32
 7 1 4 141.11 3.69
 7 1 5 0.54 0.28
 7 1 6 5.81 0.36
 7 1 7 2.92 0.34
 7 1 8 50.64 1.19
 7 1 9 0.91 0.28
 7 1 10 46.83 1.27
 7 1 11 -0.83 0.32
 7 1 12 15.01 0.56
 7 1 13 6.53 0.43
 7 1 14 2.91 0.43
 7 2 -10 49.37 1.75
 7 2 -8 44.01 1.34
 7 2 -7 49.28 1.57
 7 2 -6 170.08 4.64
 7 2 -5 127.11 2.82
 7 2 -4 140.82 3.94
 7 2 -3 17.46 0.97
 7 2 -2 18.61 0.77
 7 2 -1 337.85 10.64
 7 2 0 25.64 1.04
 7 2 1 588.09 13.91
 7 2 2 4.19 0.43
 7 2 3 615.4 12.1
 7 2 4 3.57 0.48
 7 2 5 41.38 1.03
 7 2 6 0.09 0.32
 7 2 7 220.94 4.79
 7 2 8 0.14 0.29
 7 2 9 178.26 4.09
 7 2 10 5.52 0.81
 7 2 11 94.26 3.08
 7 2 12 2.25 0.31
 7 2 13 12.88 0.55
 7 2 14 -0.21 0.36
 7 3 -11 0.58 0.21
 7 3 -10 4.02 0.29
 7 3 -9 13.13 0.41
 7 3 -8 26.26 0.77
 7 3 -7 17.46 0.5
 7 3 -6 58.07 1.51
 7 3 -5 2.27 0.34
 7 3 -4 687.95 12.42
 7 3 -3 79.63 2.36
 7 3 -2 440.34 8.71
 7 3 -1 14 0.65
 7 3 0 494.22 11.41
 7 3 1 11.17 0.54
 7 3 2 275.31 6.74
 7 3 3 115.44 2.7
 7 3 4 34.07 0.94
 7 3 5 0.19 0.35
 7 3 6 94.39 2.3
 7 3 7 5.72 0.44
 7 3 8 91.75 1.99
 7 3 9 4.92 0.36
 7 3 10 100.54 2.98
 7 3 11 1.84 0.31
 7 3 12 20.7 0.66
 7 3 13 0.79 0.3
 7 4 -13 7.79 0.33
 7 4 -12 19.85 0.69
 7 4 -11 33.12 1
 7 4 -10 75.14 2.02
 7 4 -9 2.64 0.41
 7 4 -8 79.48 1.88
 7 4 -7 8.04 0.38
 7 4 -6 68.89 1.51
 7 4 -5 104.9 2.54
 7 4 -4 65.67 1.8
 7 4 -3 195.44 4.72
 7 4 -2 58.82 1.78
 7 4 -1 20.32 0.79
 7 4 0 16.95 0.63
 7 4 1 3.23 0.38
 7 4 2 1.22 0.38
 7 4 3 164.09 3.49
 7 4 4 356.19 8.04
 7 4 5 305.14 8.45
 7 4 6 63.37 1.44
 7 4 7 246.22 8.89
 7 4 8 5.88 0.34
 7 4 9 89.02 2.13
 7 4 10 -0.18 0.28
 7 4 11 7.61 0.42
 7 4 12 0.46 0.45
 7 4 13 9.78 0.52
 7 5 -15 30.22 1.32
 7 5 -14 11.6 0.36
 7 5 -13 112.26 3.12
 7 5 -12 34.29 2.08
 7 5 -11 176.64 6.83
 7 5 -10 5.45 0.29
 7 5 -9 221.73 4.6
 7 5 -8 4.94 0.3
 7 5 -7 295.48 10.33
 7 5 -6 1.56 0.29
 7 5 -5 232.74 4.53
 7 5 -4 20.93 0.64
 7 5 -3 396.18 7.02
 7 5 -2 -0.02 0.31
 7 5 -1 12.28 0.48
 7 5 0 40.15 1.02
 7 5 1 0.82 0.3
 7 5 2 278.77 5.93
 7 5 3 72.24 1.77
 7 5 4 203.89 4.31
 7 5 5 30.4 0.85
 7 5 6 26.64 0.74
 7 5 7 2.44 0.29
 7 5 8 8.53 0.42
 7 5 9 3.13 0.31
 7 5 10 1.12 0.33
 7 5 11 2.2 0.35
 7 5 12 1.45 0.41
 7 6 -17 0.78 0.45
 7 6 -16 37.18 1.69
 7 6 -15 0.37 0.38
 7 6 -14 59.02 1.95
 7 6 -13 8.15 0.43
 7 6 -12 111 2.57
 7 6 -11 1.09 0.24
 7 6 -10 244.49 4.38
 7 6 -9 5.5 0.33
 7 6 -8 89.45 1.73
 7 6 -7 4.84 0.37
 7 6 -6 0.71 0.44
 7 6 -5 0.06 0.24
 7 6 -4 11.25 0.48
 7 6 -3 0.25 0.31
 7 6 -2 295.42 10.5
 7 6 -1 79.91 1.78
 7 6 0 222.83 4.11
 7 6 1 -0.61 0.26
 7 6 2 128.01 2.82
 7 6 3 13.06 0.52
 7 6 4 60.73 1.4
 7 6 5 1.65 0.36
 7 6 6 26.19 0.98
 7 6 7 21.54 0.76
 7 6 8 -0.21 0.37
 7 6 9 10.43 0.56
 7 6 10 1.02 0.32
 7 6 11 4.07 0.38
 7 6 12 4.76 0.53
 7 7 -17 9.99 0.77
 7 7 -16 0.53 0.63
 7 7 -15 26.01 0.85
 7 7 -14 0.4 0.32
 7 7 -13 9.89 0.44
 7 7 -12 2.25 0.48
 7 7 -11 36.8 0.87
 7 7 -10 4.16 0.33
 7 7 -9 88.69 2.04
 7 7 -8 47.6 1.01
 7 7 -7 4.7 0.3
 7 7 -6 51.96 1.13
 7 7 -5 17.01 0.73
 7 7 -4 16.69 0.62
 7 7 -3 33.15 0.9
 7 7 -2 -0.85 0.35
 7 7 -1 83.87 1.65
 7 7 0 26.76 0.75
 7 7 1 4.9 0.41
 7 7 2 39.08 0.95
 7 7 3 -0.18 0.31
 7 7 4 28.28 0.77
 7 7 5 4.38 0.37
 7 7 6 39.52 1.24
 7 7 7 0.22 0.43
 7 7 8 43.26 1.42
 7 7 9 0.92 0.28
 7 7 10 17.71 1.27
 7 7 11 -0.24 0.35
 7 8 -15 0.48 0.47
 7 8 -14 0.42 0.3
 7 8 -13 1.1 0.29
 7 8 -12 3.69 0.3
 7 8 -11 11.13 0.44
 7 8 -10 10.5 0.51
 7 8 -9 11.12 0.45
 7 8 -8 3.17 0.29
 7 8 -7 20.62 0.56
 7 8 -6 0.63 0.42
 7 8 -5 17.41 0.5
 7 8 -4 5.49 0.38
 7 8 -3 20.45 0.61
 7 8 -2 10.85 0.51
 7 8 -1 2.94 0.32
 7 8 0 6.2 0.35
 7 8 1 53.63 1.25
 7 8 2 0.21 0.31
 7 8 3 37.76 0.88
 7 8 4 0.91 0.48
 7 8 5 46.24 1.16
 7 8 6 3.02 0.33
 7 8 7 35.63 1.02
 7 8 8 -0.56 0.28
 7 8 9 25.61 1.07
 7 8 10 0.28 0.41
 7 9 -13 5.81 0.45
 7 9 -12 16.98 0.98
 7 9 -11 3.31 0.33
 7 9 -10 5.2 0.4
 7 9 -9 4.64 0.34
 7 9 -8 3.85 0.28
 7 9 -7 6.93 0.39
 7 9 -6 27 0.75
 7 9 -5 6.45 0.44
 7 9 -4 46.38 1.1
 7 9 -3 0.18 0.28
 7 9 -2 40.19 1.42
 7 9 -1 0.62 0.35
 7 9 0 12.05 0.46
 7 9 1 7.41 0.39
 7 9 2 16.96 0.66
 7 9 3 0.97 0.39
 7 9 4 14.19 0.53
 7 9 5 0.57 0.3
 7 9 6 20.03 0.77
 7 9 7 -0.03 0.27
 7 9 8 14.27 0.49
 7 10 -13 0.9 0.57
 7 10 -12 5.67 0.52
 7 10 -11 3.35 0.77
 7 10 -10 16.05 0.65
 7 10 -9 0.1 0.29
 7 10 -8 6.87 0.39
 7 10 -7 0.01 0.26
 7 10 -6 10.31 0.49
 7 10 -5 2.18 0.35
 7 10 -4 2.07 0.37
 7 10 -3 3.88 0.36
 7 10 -2 7.33 0.45
 7 10 -1 8.94 0.42
 7 10 0 4.41 0.52
 7 10 1 13.1 0.7
 7 10 2 5.36 0.44
 7 10 3 0.72 0.32
 7 10 4 0.64 0.3
 7 10 5 0.3 0.32
 7 10 6 0.22 0.57
 7 10 7 1.03 0.49
 7 11 -10 0.22 0.38
 7 11 -9 8.56 0.43
 7 11 -8 0.45 0.3
 7 11 -7 10.65 0.51
 7 11 -6 0.21 0.3
 7 11 -5 14.42 0.54
 7 11 -4 0.39 0.32
 7 11 -3 18.5 0.63
 7 11 -2 0.31 0.39
 7 11 -1 9.9 0.46
 7 11 0 0.18 0.4
 7 11 1 0.13 0.3
 7 11 2 -1.22 0.41
 7 11 3 0.79 0.27
 7 11 4 0.06 0.31
 7 12 -7 -0.5 0.4
 7 12 -6 4.15 0.36
 7 12 -5 0.73 0.32
 7 12 -4 8.76 0.4
 7 12 -3 1.98 0.34
 7 12 -2 6.75 0.42
 7 12 -1 0.23 0.31
 7 12 0 2.35 0.39
 7 12 1 0.22 0.65
 8 0 -10 3.07 0.31
 8 0 -9 0.9 0.42
 8 0 -8 347.74 12.6
 8 0 -7 -0.4 0.51
 8 0 -6 372.6 9.84
 8 0 -5 -0.83 0.52
 8 0 -4 235.12 12.06
 8 0 -3 -0.14 0.32
 8 0 -2 61.42 2.57
 8 0 -1 -0.34 0.56
 8 0 0 41.32 2.95
 8 0 1 0.16 0.62
 8 0 2 13.23 0.75
 8 0 4 27.87 1.2
 8 0 5 0.37 0.35
 8 0 6 74.43 2.41
 8 0 7 -0.18 0.45
 8 0 8 6.96 0.49
 8 0 9 0.06 0.4
 8 0 10 11.57 0.75
 8 0 11 0.08 0.47
 8 0 12 12.69 1.06
 8 1 -10 0.78 0.18
 8 1 -9 29.97 0.77
 8 1 -8 1.8 0.26
 8 1 -7 71.65 2.14
 8 1 -6 227.82 5.06
 8 1 -5 150.02 3.91
 8 1 -4 127.49 3.64
 8 1 -3 9.11 0.5
 8 1 -2 263.25 6.48
 8 1 -1 14.6 0.7
 8 1 0 367.78 9.15
 8 1 1 1.27 0.27
 8 1 2 247.78 5.52
 8 1 3 1.11 0.26
 8 1 4 24.73 0.76
 8 1 5 74.98 2.01
 8 1 6 6.19 0.58
 8 1 7 19.36 0.59
 8 1 8 15.92 0.68
 8 1 9 3.9 0.45
 8 1 10 24.2 0.86
 8 1 11 14.04 0.74
 8 1 12 5.06 0.38
 8 2 -11 72.17 2.52
 8 2 -10 8.08 0.38
 8 2 -9 66.56 1.98
 8 2 -8 -0.1 0.46
 8 2 -7 13.45 0.83
 8 2 -6 6.93 0.44
 8 2 -5 263.12 6.09
 8 2 -4 1.07 0.35
 8 2 -3 277.5 6
 8 2 -2 -0.63 0.44
 8 2 -1 605.12 16.86
 8 2 0 33.68 1.25
 8 2 1 673.96 15.29
 8 2 2 28.07 1.24
 8 2 3 367.05 9.53
 8 2 4 3.79 0.43
 8 2 5 118.16 2.6
 8 2 6 15.43 0.67
 8 2 7 88.48 1.95
 8 2 8 0.86 0.35
 8 2 9 64.76 1.83
 8 2 10 3.4 0.36
 8 2 11 26.29 0.92
 8 2 12 18.56 0.61
 8 3 -11 4.16 0.31
 8 3 -10 120.23 4.15
 8 3 -9 1.08 0.37
 8 3 -8 218.9 8.11
 8 3 -7 54.31 1.46
 8 3 -6 209.87 5.84
 8 3 -5 260.93 5.75
 8 3 -4 149.95 3.69
 8 3 -3 3.77 0.46
 8 3 -2 238.08 5.82
 8 3 -1 159.58 3.71
 8 3 0 182.68 4.04
 8 3 1 157.75 3.95
 8 3 2 331.62 7.35
 8 3 3 0.42 0.29
 8 3 4 22.24 1.03
 8 3 5 2.46 0.34
 8 3 6 132.4 2.7
 8 3 7 2.7 0.36
 8 3 8 142.06 3.47
 8 3 9 -0.15 0.29
 8 3 10 66.88 2.17
 8 3 11 7.3 0.68
 8 3 12 31.89 0.99
 8 4 -13 5.95 0.32
 8 4 -12 103.48 4.23
 8 4 -11 62.57 1.45
 8 4 -10 3.19 0.27
 8 4 -9 95.76 2.17
 8 4 -8 0.66 0.24
 8 4 -7 139.82 2.72
 8 4 -6 18.64 0.66
 8 4 -5 75.5 1.88
 8 4 -4 141.37 2.88
 8 4 -3 1.05 0.3
 8 4 -2 20.33 0.66
 8 4 -1 77.04 1.72
 8 4 0 13.04 0.51
 8 4 1 284.6 7.81
 8 4 2 0.82 0.3
 8 4 3 201.46 4.23
 8 4 4 0.65 0.3
 8 4 5 176.42 4.05
 8 4 6 1.41 0.29
 8 4 7 97.99 2.6
 8 4 8 9.36 0.44
 8 4 9 65.07 2.03
 8 4 10 0.91 0.33
 8 4 11 1.79 0.29
 8 4 12 -0.07 0.36
 8 5 -14 -0.1 0.39
 8 5 -13 40.65 1.97
 8 5 -12 6.71 0.44
 8 5 -11 198.97 4.24
 8 5 -10 0.71 0.26
 8 5 -9 139.25 3
 8 5 -8 2.09 0.3
 8 5 -7 47.13 1.23
 8 5 -6 55.64 1.22
 8 5 -5 31.39 0.9
 8 5 -4 250.25 5.29
 8 5 -3 6.3 0.32
 8 5 -2 22.07 0.71
 8 5 -1 9.01 0.38
 8 5 0 10.82 0.5
 8 5 1 124.92 2.52
 8 5 2 0.02 0.29
 8 5 3 -0.16 0.27
 8 5 4 101.02 2.72
 8 5 5 3 0.32
 8 5 6 40.45 1.38
 8 5 7 3.54 0.34
 8 5 8 18.45 0.73
 8 5 9 9.31 0.58
 8 5 10 -0.6 0.3
 8 5 11 9.34 0.66
 8 6 -16 13.38 0.75
 8 6 -15 1.62 0.33
 8 6 -14 20.67 1.07
 8 6 -13 1.23 0.53
 8 6 -12 48.14 1.64
 8 6 -11 0.6 0.31
 8 6 -10 67.83 1.67
 8 6 -9 20.6 0.6
 8 6 -8 32.03 0.73
 8 6 -7 5.9 0.42
 8 6 -6 53.36 1.2
 8 6 -5 37.23 1.01
 8 6 -4 57.69 1.82
 8 6 -3 9.2 0.39
 8 6 -2 11.88 0.54
 8 6 -1 128.9 2.49
 8 6 0 3.43 0.37
 8 6 1 17.62 0.57
 8 6 2 9.86 0.43
 8 6 3 1.83 0.37
 8 6 4 0.75 0.35
 8 6 5 0.3 0.32
 8 6 6 30.01 1
 8 6 7 3.19 0.38
 8 6 8 42.76 1.28
 8 6 9 10.22 0.52
 8 6 10 9.81 0.55
 8 7 -15 1.9 0.31
 8 7 -14 0.99 0.39
 8 7 -13 4.6 0.52
 8 7 -12 3.85 0.34
 8 7 -11 35.59 1
 8 7 -10 14.86 0.52
 8 7 -9 30.4 0.77
 8 7 -8 25.22 0.7
 8 7 -7 2.35 0.28
 8 7 -6 66.8 1.58
 8 7 -5 1.49 0.46
 8 7 -4 89.35 2
 8 7 -3 6.97 0.39
 8 7 -2 86.56 1.77
 8 7 -1 4.8 0.35
 8 7 0 32.09 0.81
 8 7 1 4.35 0.33
 8 7 2 36.74 1.05
 8 7 3 1.8 0.34
 8 7 4 27.52 0.81
 8 7 5 -0.04 0.29
 8 7 6 23.45 0.7
 8 7 7 7.17 0.51
 8 7 8 10.8 0.67
 8 7 9 -0.4 0.3
 8 8 -15 0.29 0.71
 8 8 -14 -0.52 0.68
 8 8 -13 4.48 0.4
 8 8 -12 1.38 0.44
 8 8 -11 6.86 0.42
 8 8 -10 7.42 0.46
 8 8 -9 11.93 0.52
 8 8 -8 2.34 0.33
 8 8 -7 47.88 1.67
 8 8 -6 3.02 0.38
 8 8 -5 85.71 3.17
 8 8 -4 -0.02 0.46
 8 8 -3 81.47 1.73
 8 8 -2 9.78 0.47
 8 8 -1 22.77 0.64
 8 8 0 -0.09 0.28
 8 8 1 48.74 1.31
 8 8 2 -0.34 0.3
 8 8 3 36.93 0.95
 8 8 4 0.31 0.36
 8 8 5 46.41 1.23
 8 8 6 0.62 0.35
 8 8 7 21.05 0.93
 8 8 8 0.47 0.4
 8 9 -14 0.72 0.49
 8 9 -13 1.35 0.67
 8 9 -12 15.66 0.61
 8 9 -11 1.23 0.31
 8 9 -10 18.24 0.67
 8 9 -9 7.71 0.48
 8 9 -8 28.11 0.89
 8 9 -7 3.65 0.34
 8 9 -6 25.67 0.96
 8 9 -5 1 0.4
 8 9 -4 42.01 1.17
 8 9 -3 3.78 0.36
 8 9 -2 18.05 0.84
 8 9 -1 0.44 0.29
 8 9 0 47.82 2.05
 8 9 1 -0.25 0.29
 8 9 2 18.6 0.64
 8 9 3 -0.33 0.36
 8 9 4 21.06 0.69
 8 9 5 0.1 0.29
 8 9 6 12.09 0.44
 8 10 -12 4.43 0.68
 8 10 -11 4.01 0.52
 8 10 -10 1.49 0.38
 8 10 -9 1.74 0.39
 8 10 -8 0.5 0.35
 8 10 -7 2.46 0.39
 8 10 -6 -0.46 0.32
 8 10 -5 7.32 0.41
 8 10 -4 0.43 0.36
 8 10 -3 15.76 0.55
 8 10 -2 2.28 0.33
 8 10 -1 12.91 0.52
 8 10 0 1.75 0.32
 8 10 1 3.16 0.41
 8 10 2 0.68 0.35
 8 10 3 1.82 0.31
 8 10 4 0.52 0.38
 8 11 -8 -0.23 0.39
 8 11 -7 1.93 0.4
 8 11 -6 -0.27 0.33
 8 11 -5 0.8 0.33
 8 11 -4 -0.07 0.29
 8 11 -3 3.55 0.39
 8 11 -2 0.58 0.31
 8 11 -1 0.45 0.34
 8 11 0 6.51 0.46
 8 11 1 -0.99 0.58
 8 11 2 2.36 0.42
 9 0 -11 0.23 0.28
 9 0 -10 1.5 0.26
 9 0 -9 -0.12 0.3
 9 0 -8 48.38 2.03
 9 0 -7 -0.39 0.32
 9 0 -6 55.67 2.65
 9 0 -5 0.05 0.37
 9 0 -4 5.63 0.79
 9 0 -3 -0.63 0.36
 9 0 -2 22.02 1.07
 9 0 -1 0.03 0.45
 9 0 0 195.13 6.14
 9 0 1 -0.11 0.34
 9 0 2 67.02 2.31
 9 0 3 0.43 0.66
 9 0 4 118.85 3.86
 9 0 5 -0.33 0.52
 9 0 6 117.86 3.82
 9 0 7 -0.24 0.44
 9 0 8 12.65 0.76
 9 0 9 0.02 0.42
 9 0 10 21.12 0.98
 9 1 -11 1.43 0.3
 9 1 -10 167.44 4.18
 9 1 -8 7.73 0.4
 9 1 -7 33.52 0.83
 9 1 -6 54.49 1.69
 9 1 -5 7.99 0.48
 9 1 -4 98.39 2.26
 9 1 -3 43.95 1.57
 9 1 -2 140.32 6.34
 9 1 -1 71.78 1.8
 9 1 0 173.75 3.69
 9 1 1 81.91 2.37
 9 1 2 17.78 0.59
 9 1 3 99.23 2.18
 9 1 4 3.33 0.38
 9 1 5 54.26 1.4
 9 1 6 3.64 0.34
 9 1 7 27.21 0.97
 9 1 8 3.18 0.49
 9 1 9 23.94 0.85
 9 1 10 15.63 0.68
 9 1 11 11.02 0.52
 9 2 -11 99.02 2.62
 9 2 -10 27.62 0.92
 9 2 -9 111.97 2.49
 9 2 -8 9.47 0.41
 9 2 -7 251.29 5.33
 9 2 -6 147.38 5.71
 9 2 -5 52.89 1.78
 9 2 -4 50.45 1.93
 9 2 -3 225.17 6.13
 9 2 -2 0.79 0.34
 9 2 -1 360.51 14.59
 9 2 0 23.99 0.97
 9 2 1 605.34 11.52
 9 2 2 0.03 0.36
 9 2 3 78.49 2.26
 9 2 4 22 1.1
 9 2 5 10.96 1.14
 9 2 6 1.25 0.36
 9 2 7 11.09 0.53
 9 2 8 7.88 0.48
 9 2 9 0.61 0.41
 9 2 10 13.61 0.52
 9 2 11 0.59 0.4
 9 3 -12 71.9 1.6
 9 3 -11 3.6 0.47
 9 3 -10 106 2.96
 9 3 -9 -0.16 0.45
 9 3 -8 185.63 4.06
 9 3 -7 11.51 0.58
 9 3 -6 335.84 8.72
 9 3 -5 13.57 0.56
 9 3 -4 22.94 1.05
 9 3 -3 0.56 0.26
 9 3 -2 60.82 1.81
 9 3 -1 3.05 0.38
 9 3 0 195.34 3.97
 9 3 1 -0.04 0.32
 9 3 2 231.3 5.76
 9 3 3 0.93 0.35
 9 3 4 83.27 2.11
 9 3 5 24.2 0.79
 9 3 6 53.32 1.69
 9 3 7 20.35 0.68
 9 3 8 54.84 1.67
 9 3 9 0.67 0.32
 9 3 10 7.65 0.44
 9 4 -13 56.16 2.32
 9 4 -12 11.56 0.56
 9 4 -11 54.42 1.31
 9 4 -10 15.49 0.55
 9 4 -9 43.61 1.21
 9 4 -8 0.2 0.27
 9 4 -7 82.67 3.79
 9 4 -6 112.23 3.18
 9 4 -5 276.1 7.25
 9 4 -4 66.45 1.78
 9 4 -3 93.29 2.92
 9 4 -2 11.75 0.45
 9 4 -1 86.71 1.88
 9 4 0 22.49 0.68
 9 4 1 91.59 2.54
 9 4 2 0.04 0.31
 9 4 3 37.49 1.07
 9 4 4 92.53 2.86
 9 4 5 36.93 1.01
 9 4 6 67.39 2.01
 9 4 7 23.93 0.82
 9 4 8 32.48 1.06
 9 4 9 7.88 0.44
 9 4 10 2.83 0.38
 9 5 -13 14.54 0.65
 9 5 -12 17.33 0.79
 9 5 -11 16.16 0.72
 9 5 -10 32.19 0.98
 9 5 -9 0.84 0.28
 9 5 -8 115.22 2.69
 9 5 -7 5.5 0.31
 9 5 -6 107.35 4.48
 9 5 -5 1.98 0.28
 9 5 -4 53.83 1.35
 9 5 -3 76.29 2.37
 9 5 -2 3.8 0.39
 9 5 -1 79.8 2.38
 9 5 0 0.38 0.33
 9 5 1 14.27 0.59
 9 5 2 7.99 0.48
 9 5 3 14.3 0.62
 9 5 4 1.86 0.34
 9 5 5 60.97 1.68
 9 5 6 8.09 0.62
 9 5 7 53.38 2.09
 9 5 8 0.89 0.33
 9 5 9 5.74 0.47
 9 6 -15 0.48 0.31
 9 6 -14 -0.26 0.35
 9 6 -13 -0.11 0.36
 9 6 -11 1.71 0.32
 9 6 -10 20.3 0.66
 9 6 -9 15.58 0.51
 9 6 -8 0.44 0.29
 9 6 -7 19.59 0.59
 9 6 -6 -0.28 0.31
 9 6 -5 3.76 0.42
 9 6 -4 -0.01 0.34
 9 6 -3 4.07 0.5
 9 6 -2 24.28 0.69
 9 6 -1 1.58 0.4
 9 6 0 66.87 2
 9 6 1 56.49 1.4
 9 6 2 47.61 1.16
 9 6 3 7.33 0.43
 9 6 4 37.21 1.32
 9 6 5 0.83 0.28
 9 6 6 59.24 2.03
 9 6 7 7.41 0.49
 9 6 8 15.3 0.63
 9 7 -14 5.29 0.42
 9 7 -13 3.66 0.64
 9 7 -12 7.11 0.4
 9 7 -11 7.22 0.45
 9 7 -10 25.91 0.86
 9 7 -9 0.38 0.27
 9 7 -8 26.66 0.7
 9 7 -7 -0.01 0.3
 9 7 -6 58.61 1.67
 9 7 -5 -0.3 0.28
 9 7 -4 40.29 1.44
 9 7 -3 0.6 0.34
 9 7 -2 41.09 1.03
 9 7 -1 35.98 0.93
 9 7 0 55.42 1.42
 9 7 1 1.4 0.31
 9 7 2 3.58 0.34
 9 7 3 0.64 0.3
 9 7 4 4.75 0.36
 9 7 5 0.82 0.33
 9 7 6 7.9 0.71
 9 7 7 2.07 0.41
 9 8 -14 -0.17 0.48
 9 8 -13 12.57 0.73
 9 8 -12 0.49 0.34
 9 8 -11 17.74 0.71
 9 8 -10 0.13 0.31
 9 8 -9 14.74 0.52
 9 8 -8 0.36 0.4
 9 8 -7 23.65 0.63
 9 8 -6 -0.29 0.27
 9 8 -5 48.99 2.79
 9 8 -4 3.6 0.36
 9 8 -3 71.55 1.84
 9 8 -2 1.55 0.28
 9 8 -1 37.79 0.96
 9 8 0 1.4 0.35
 9 8 1 17.63 0.56
 9 8 2 -0.39 0.27
 9 8 3 25.01 0.78
 9 8 4 1.96 0.32
 9 8 5 16.46 0.76
 9 8 6 7.27 0.59
 9 9 -12 15.03 0.7
 9 9 -11 -0.85 0.39
 9 9 -10 5.37 0.36
 9 9 -9 0.09 0.32
 9 9 -8 7.14 0.44
 9 9 -7 0.23 0.32
 9 9 -6 17.57 0.88
 9 9 -5 -0.34 0.44
 9 9 -4 45.68 1.47
 9 9 -3 0.21 0.35
 9 9 -2 19.31 0.57
 9 9 -1 8.22 0.41
 9 9 0 21.26 0.78
 9 9 1 0.14 0.35
 9 9 2 11.72 0.55
 9 9 3 1.16 0.34
 9 9 4 18.65 0.66
 9 10 -10 -1.24 0.61
 9 10 -9 2.38 0.43
 9 10 -8 0.22 0.36
 9 10 -7 3.38 0.36
 9 10 -6 0.05 0.31
 9 10 -5 9.91 0.47
 9 10 -4 -0.72 0.31
 9 10 -3 0.73 0.3
 9 10 -2 -0.87 0.3
 9 10 -1 6.86 0.37
 9 10 0 0.36 0.29
 9 10 1 7.45 0.36
 9 10 2 1.37 0.37
 9 11 -6 0.11 0.39
 9 11 -5 1.88 0.47
 9 11 -4 3.16 0.37
 9 11 -3 -0.52 0.44
 9 11 -2 3.98 0.45
 10 0 -11 0.56 0.26
 10 0 -10 -0.11 0.44
 10 0 -8 255.8 10.11
 10 0 -7 0.03 0.5
 10 0 -6 115.18 3.52
 10 0 -5 0.16 0.4
 10 0 -4 77.47 2.72
 10 0 -3 -0.4 0.36
 10 0 -2 72.53 3.79
 10 0 -1 0.06 0.42
 10 0 0 157.07 5.17
 10 0 1 -0.3 0.37
 10 0 2 308.39 8.77
 10 0 4 168.72 6.03
 10 0 5 0.46 0.53
 10 0 6 123.87 3.88
 10 0 7 -0.47 0.59
 10 0 8 105.08 4.65
 10 0 9 -0.59 0.58
 10 1 -12 22.75 0.96
 10 1 -11 1.27 0.28
 10 1 -10 72.05 2.35
 10 1 -9 48.64 1.35
 10 1 -8 146.28 3.5
 10 1 -7 61.67 1.59
 10 1 -6 3.55 0.32
 10 1 -5 137.69 3.32
 10 1 -4 8.71 0.39
 10 1 -3 108.74 2.43
 10 1 -2 0.85 0.25
 10 1 -1 234.23 4.87
 10 1 0 146.83 3.31
 10 1 1 126.99 3.35
 10 1 2 32.27 1.13
 10 1 3 114.19 2.75
 10 1 4 3.13 0.35
 10 1 5 100.31 2.46
 10 1 6 12.18 0.54
 10 1 7 34.11 0.93
 10 1 8 5.57 0.43
 10 1 9 23.22 0.92
 10 2 -12 1.05 0.36
 10 2 -11 150.46 3.99
 10 2 -10 2.65 0.3
 10 2 -9 65.23 1.66
 10 2 -8 3.87 0.28
 10 2 -7 191.83 4.97
 10 2 -6 0.48 0.3
 10 2 -5 24.67 1.09
 10 2 -4 8.24 0.38
 10 2 -3 61.91 1.49
 10 2 -2 64.83 1.87
 10 2 -1 155.6 4
 10 2 0 133.72 3.68
 10 2 1 68.98 2.01
 10 2 2 58.26 1.99
 10 2 3 1.02 0.37
 10 2 4 34.32 1.52
 10 2 5 8.23 0.71
 10 2 6 0.09 0.32
 10 2 7 7.59 0.48
 10 2 8 0.08 0.3
 10 2 9 0.17 0.54
 10 3 -13 0.25 0.27
 10 3 -12 67.07 2
 10 3 -11 41.85 1.94
 10 3 -9 93.95 4.8
 10 3 -8 106.75 4.49
 10 3 -7 0.49 0.28
 10 3 -6 134.34 3.01
 10 3 -5 2.66 0.29
 10 3 -4 85.02 2.65
 10 3 -3 14.18 0.52
 10 3 -2 86.87 2.21
 10 3 -1 -0.04 0.33
 10 3 0 108.95 2.62
 10 3 1 13.35 0.7
 10 3 2 26.73 1.06
 10 3 3 2.41 0.34
 10 3 4 10.24 0.56
 10 3 5 26.81 0.92
 10 3 6 4.72 0.5
 10 3 7 1.24 0.33
 10 3 8 1.92 0.29
 10 3 9 0.4 0.45
 10 4 -13 10 0.68
 10 4 -12 5.47 0.65
 10 4 -11 6.94 0.55
 10 4 -10 1.36 0.47
 10 4 -9 77.12 2.44
 10 4 -8 2.11 0.55
 10 4 -7 144.71 4.4
 10 4 -6 22.3 0.73
 10 4 -5 161.44 3.65
 10 4 -4 17.48 0.71
 10 4 -3 41.76 1.7
 10 4 -2 65.52 1.47
 10 4 -1 23.78 0.84
 10 4 0 43.11 1.68
 10 4 1 1.08 0.32
 10 4 2 11.86 0.6
 10 4 3 0.97 0.31
 10 4 4 94.81 2.42
 10 4 5 1.54 0.38
 10 4 6 67.37 2.22
 10 4 7 0.75 0.29
 10 4 8 16.3 0.71
 10 5 -13 2.11 0.46
 10 5 -12 16.84 0.84
 10 5 -11 21.18 0.89
 10 5 -10 25.86 0.74
 10 5 -9 50.64 1.86
 10 5 -8 7.5 0.46
 10 5 -7 27.25 0.91
 10 5 -6 6.59 0.45
 10 5 -5 39.07 1.13
 10 5 -4 1.52 0.29
 10 5 -3 84.7 2.71
 10 5 -2 0 0.45
 10 5 -1 56.48 1.39
 10 5 0 3.88 0.44
 10 5 1 14.3 0.72
 10 5 2 7.15 0.49
 10 5 3 33.24 1.15
 10 5 4 2.63 0.43
 10 5 5 59.8 1.81
 10 5 6 0.8 0.34
 10 5 7 29.77 1.07
 10 6 -13 2.36 0.56
 10 6 -12 3.52 0.53
 10 6 -11 8.38 0.43
 10 6 -10 7.02 0.44
 10 6 -9 -0.44 0.3
 10 6 -8 21.92 0.64
 10 6 -7 -0.31 0.27
 10 6 -6 16.63 0.55
 10 6 -5 1.08 0.25
 10 6 -4 45.67 1.43
 10 6 -3 0.27 0.27
 10 6 -2 124.82 2.87
 10 6 -1 1.13 0.38
 10 6 0 29.61 0.85
 10 6 1 4.08 0.42
 10 6 2 49.62 1.57
 10 6 3 0.01 0.31
 10 6 4 49.48 1.63
 10 6 5 0.84 0.3
 10 6 6 29.36 1.27
 10 7 -14 6.04 0.67
 10 7 -13 -0.46 0.36
 10 7 -12 10.41 0.49
 10 7 -11 0.09 0.29
 10 7 -10 14.32 0.79
 10 7 -9 0.83 0.33
 10 7 -8 18.61 0.7
 10 7 -7 10.6 0.63
 10 7 -6 8.1 0.4
 10 7 -5 7.43 0.55
 10 7 -4 8.3 0.5
 10 7 -3 8.4 0.4
 10 7 -2 1.58 0.31
 10 7 -1 4.72 0.44
 10 7 0 0.79 0.29
 10 7 1 2.72 0.28
 10 7 2 10.11 0.6
 10 7 3 8.76 0.48
 10 7 4 8.77 0.69
 10 7 5 19.78 1.11
 10 8 -13 6.6 0.41
 10 8 -11 11.38 0.64
 10 8 -10 0.9 0.31
 10 8 -9 11.17 0.43
 10 8 -8 0.58 0.32
 10 8 -7 21.53 0.71
 10 8 -6 0.35 0.28
 10 8 -5 12 0.6
 10 8 -4 -0.02 0.34
 10 8 -3 5.29 0.39
 10 8 -2 0.78 0.34
 10 8 -1 22.51 0.81
 10 8 0 7.18 0.53
 10 8 1 1.8 0.34
 10 8 2 4.32 0.34
 10 8 3 9.4 0.57
 10 8 4 1.97 0.38
 10 9 -11 1.23 0.6
 10 9 -9 0.43 0.46
 10 9 -8 2.02 0.44
 10 9 -7 4.22 0.38
 10 9 -6 13.09 0.65
 10 9 -5 11.07 0.68
 10 9 -4 10.97 0.47
 10 9 -3 -0.1 0.27
 10 9 -2 9.24 0.5
 10 9 -1 1.8 0.33
 10 9 0 2.37 0.42
 10 9 1 1.62 0.36
 10 9 2 0.27 0.29
 10 10 -6 0.86 0.3
 10 10 -5 5.41 0.4
 10 10 -4 -0.09 0.3
 10 10 -3 4.4 0.35
 10 10 -2 4.6 0.41
 11 0 -12 38.54 1.18
 11 0 -11 -0.17 0.28
 11 0 -10 74.28 2.32
 11 0 -9 0.93 0.38
 11 0 -8 33.62 1.77
 11 0 -7 0 0.38
 11 0 -5 0.83 0.71
 11 0 -4 84.69 2.88
 11 0 -3 -0.72 0.3
 11 0 -2 308.53 10.67
 11 0 -1 0.19 0.41
 11 0 0 131.89 5.2
 11 0 1 0.36 0.42
 11 0 2 151.1 5.11
 11 0 3 0.01 0.42
 11 0 4 149.11 5.95
 11 0 5 0.94 0.37
 11 0 6 46.58 3.16
 11 0 7 0.05 0.44
 11 1 -12 12.34 0.51
 11 1 -11 8.66 0.41
 11 1 -10 3.05 0.4
 11 1 -9 116.83 2.48
 11 1 -8 11.01 0.5
 11 1 -7 77.26 2.56
 11 1 -6 4.6 0.34
 11 1 -5 65.54 1.83
 11 1 -4 -0.12 0.26
 11 1 -3 81.91 2.25
 11 1 -2 0.71 0.47
 11 1 -1 105.59 3.31
 11 1 0 21.4 1.12
 11 1 1 90.16 2.45
 11 1 2 7.23 0.44
 11 1 3 68.44 2.89
 11 1 4 7.08 0.69
 11 1 5 47.33 1.64
 11 1 6 6.44 0.47
 11 1 7 37.89 1.31
 11 2 -12 6.26 0.33
 11 2 -11 8.58 0.43
 11 2 -10 1.09 0.32
 11 2 -9 63.61 2.34
 11 2 -8 12.69 0.65
 11 2 -7 21.16 0.82
 11 2 -6 9.04 0.53
 11 2 -5 -0.12 0.31
 11 2 -4 24.32 1.07
 11 2 -3 11.06 0.5
 11 2 -2 54.3 1.5
 11 2 -1 4.22 0.34
 11 2 0 107.5 4.52
 11 2 1 4.31 0.41
 11 2 2 14.9 1.09
 11 2 3 21.09 1.11
 11 2 4 14.96 0.86
 11 2 5 2.52 0.33
 11 2 6 27.69 0.98
 11 2 7 12.01 0.5
 11 3 -13 13.59 0.8
 11 3 -12 27.85 1.03
 11 3 -11 2.89 0.31
 11 3 -10 33.55 1.09
 11 3 -9 5.5 0.34
 11 3 -8 44.04 1.39
 11 3 -7 0.79 0.37
 11 3 -6 11.42 0.58
 11 3 -5 14.71 0.61
 11 3 -4 -0.58 0.29
 11 3 -3 1 0.3
 11 3 -2 19.62 0.73
 11 3 -1 2.53 0.38
 11 3 0 6.11 0.43
 11 3 1 8.53 0.67
 11 3 2 0.82 0.31
 11 3 3 0.31 0.28
 11 3 4 0.93 0.3
 11 3 5 1.67 0.34
 11 3 6 6.37 0.47
 11 3 7 3.1 0.8
 11 4 -13 10.5 0.51
 11 4 -12 1.67 0.35
 11 4 -11 9.93 0.53
 11 4 -10 39.35 1.55
 11 4 -9 14.75 0.7
 11 4 -8 27.48 1.01
 11 4 -7 14.11 0.5
 11 4 -6 56.27 1.6
 11 4 -5 10.23 0.61
 11 4 -4 86.21 2.33
 11 4 -3 12.03 0.55
 11 4 -2 66.51 1.71
 11 4 -1 -0.14 0.35
 11 4 0 25.22 1.08
 11 4 1 5.49 0.46
 11 4 2 12.91 0.72
 11 4 3 12.87 0.76
 11 4 4 62.04 2.8
 11 4 5 5.01 0.49
 11 4 6 14.73 0.64
 11 5 -13 9.48 0.43
 11 5 -12 10.96 0.54
 11 5 -11 30.09 1.12
 11 5 -10 8.69 0.48
 11 5 -9 58.26 1.64
 11 5 -8 0.71 0.31
 11 5 -7 30.6 1.1
 11 5 -6 4.97 0.36
 11 5 -5 38.76 1.22
 11 5 -4 5.11 0.39
 11 5 -3 109.86 5.1
 11 5 -2 2.47 0.33
 11 5 -1 24.26 0.93
 11 5 0 6.65 0.83
 11 5 1 7.91 0.57
 11 5 2 6.91 0.44
 11 5 3 32.78 1.35
 11 5 4 0.74 0.3
 11 5 5 22.61 1.39
 11 6 -14 13.07 0.68
 11 6 -13 1.75 0.39
 11 6 -12 8.8 0.59
 11 6 -11 -0.07 0.27
 11 6 -10 9.13 0.53
 11 6 -9 4.31 0.69
 11 6 -8 14.45 0.6
 11 6 -7 -0.22 0.56
 11 6 -6 31.61 1.4
 11 6 -5 0.8 0.62
 11 6 -4 71.19 1.69
 11 6 -3 7.63 0.47
 11 6 -2 82.23 1.9
 11 6 -1 15.13 0.68
 11 6 0 39.41 1.21
 11 6 1 0.17 0.33
 11 6 2 25.59 1.13
 11 6 3 -0.68 0.34
 11 6 4 9.53 0.62
 11 7 -10 0.19 0.29
 11 7 -9 2.83 0.38
 11 7 -8 6.29 0.41
 11 7 -7 4.28 0.36
 11 7 -6 0.87 0.32
 11 7 -5 10.07 0.45
 11 7 -4 0.64 0.29
 11 7 -3 11.76 0.55
 11 7 -2 -0.18 0.29
 11 7 -1 5.14 0.38
 11 7 0 0.66 0.38
 11 7 1 28.1 0.99
 11 7 2 1.36 0.37
 11 7 3 22.51 1
 11 8 -10 1.26 0.31
 11 8 -9 1.03 0.56
 11 8 -8 2.98 0.47
 11 8 -7 6.25 0.45
 11 8 -6 0.1 0.35
 11 8 -5 7.95 0.43
 11 8 -4 4.67 0.34
 11 8 -3 0.22 0.35
 11 8 -2 0.61 0.42
 11 8 -1 0.28 0.31
 11 8 0 0.68 0.3
 11 8 1 3 0.33
 11 9 -7 -0.14 0.43
 11 9 -6 1.78 0.36
 11 9 -5 1.81 0.43
 11 9 -4 0.58 0.33
 11 9 -3 2.02 0.29
 12 0 -12 13.93 0.64
 12 0 -11 0.32 0.46
 12 0 -10 91.33 2.71
 12 0 -9 1.39 0.41
 12 0 -8 41.48 2.71
 12 0 -7 -1 0.68
 12 0 -6 74.95 2.75
 12 0 -4 98.23 4.17
 12 0 -3 0.06 0.68
 12 0 -2 144.16 5.48
 12 0 -1 0.93 0.39
 12 0 0 26.6 1.7
 12 0 1 0.29 0.62
 12 0 2 11.94 1.34
 12 0 3 0.19 0.64
 12 0 4 21.52 1.38
 12 0 5 -0.37 0.36
 12 1 -13 12.67 0.65
 12 1 -12 1.14 0.5
 12 1 -11 62.05 1.8
 12 1 -10 -0.1 0.29
 12 1 -9 58.46 1.7
 12 1 -8 1.11 0.3
 12 1 -7 16.14 0.95
 12 1 -6 4.06 0.34
 12 1 -5 17.85 1.05
 12 1 -4 4.92 0.64
 12 1 -3 55.71 1.88
 12 1 -2 -0.41 0.31
 12 1 -1 27.51 1.22
 12 1 0 4.54 0.42
 12 1 1 5.73 0.5
 12 1 2 2.5 0.33
 12 1 3 21.11 1
 12 1 4 1.85 0.36
 12 1 5 6.71 0.8
 12 2 -12 1.46 0.29
 12 2 -11 0.41 0.47
 12 2 -10 10.21 0.7
 12 2 -9 1.38 0.31
 12 2 -8 15.61 0.72
 12 2 -7 6.14 0.39
 12 2 -6 2.55 0.36
 12 2 -5 28.97 1.17
 12 2 -4 25.08 0.93
 12 2 -3 53.01 1.99
 12 2 -2 10.58 0.55
 12 2 -1 23.62 0.99
 12 2 0 21.43 1.43
 12 2 1 22.78 1.04
 12 2 2 12.6 0.75
 12 2 3 10.65 0.61
 12 2 4 5.22 0.4
 12 2 5 21.71 1
 12 3 -13 0.22 0.37
 12 3 -12 1.87 0.35
 12 3 -11 1.65 0.46
 12 3 -9 0.05 0.32
 12 3 -8 -0.4 0.31
 12 3 -7 0.26 0.56
 12 3 -6 1.25 0.36
 12 3 -5 10.47 0.69
 12 3 -4 7.71 0.53
 12 3 -3 1.87 0.3
 12 3 -2 7.29 0.71
 12 3 -1 3.57 0.5
 12 3 0 8.27 0.61
 12 3 1 0.81 0.48
 12 3 2 37.88 3.15
 12 3 3 8.37 0.63
 12 3 4 11.72 0.62
 12 4 -13 0.76 0.36
 12 4 -12 4.32 0.36
 12 4 -11 0.77 0.28
 12 4 -10 20.5 0.99
 12 4 -9 -0.23 0.27
 12 4 -8 19.12 1.39
 12 4 -7 -0.2 0.52
 12 4 -6 48.6 1.64
 12 4 -5 9.85 0.49
 12 4 -4 82.75 2.34
 12 4 -3 0.12 0.26
 12 4 -2 46.15 1.33
 12 4 -1 16.5 1.43
 12 4 0 14.95 0.79
 12 4 1 40.88 1.68
 12 4 2 2.31 0.37
 12 4 3 10.29 0.69
 12 4 4 0.04 0.36
 12 5 -13 4.75 0.46
 12 5 -11 8.4 0.59
 12 5 -10 3.86 0.39
 12 5 -9 8.05 0.49
 12 5 -8 2.62 0.42
 12 5 -7 24.49 1.14
 12 5 -6 1.35 0.37
 12 5 -5 20.57 1.02
 12 5 -4 0.62 0.57
 12 5 -3 27.5 1
 12 5 -2 0.6 0.29
 12 5 -1 31.12 1.3
 12 5 0 0.13 0.43
 12 5 1 17.3 0.76
 12 5 2 1.49 0.38
 12 5 3 13.83 0.92
 12 6 -11 0.26 0.5
 12 6 -10 13.78 0.68
 12 6 -9 4.65 0.59
 12 6 -8 17.91 0.83
 12 6 -7 0.61 0.35
 12 6 -6 32.42 1.67
 12 6 -5 4.6 0.59
 12 6 -4 36.23 1.21
 12 6 -3 0.36 0.3
 12 6 -2 11.19 0.63
 12 6 -1 0.3 0.32
 12 6 0 8.24 0.48
 12 6 1 0.7 0.29
 12 7 -10 -0.32 0.58
 12 7 -9 5.99 0.48
 12 7 -8 0.78 0.41
 12 7 -7 3.63 0.32
 12 7 -6 1.02 0.29
 12 7 -5 13.69 0.52
 12 7 -4 0.31 0.27
 12 7 -3 12.98 0.52
 12 7 -2 2.08 0.36
 12 7 -1 2.2 0.43
 13 0 -12 34.35 1.72
 13 0 -10 81.39 3.9
 13 0 -9 0.8 0.42
 13 0 -8 23.25 1.15
 13 0 -7 1.11 0.67
 13 0 -6 44.6 2.17
 13 0 -5 -0.72 0.49
 13 0 -4 47.09 2.87
 13 0 -3 -0.57 0.83
 13 0 -2 16.58 1.26
 13 0 -1 0.49 0.47
 13 0 0 4.85 0.97
 13 0 1 -0.94 0.54
 13 1 -11 29.82 1.38
 13 1 -10 -0.64 0.68
 13 1 -9 13.88 0.87
 13 1 -8 0.63 0.31
 13 1 -7 1.97 0.42
 13 1 -6 6.28 0.58
 13 1 -5 13.24 0.65
 13 1 -4 25.76 1.3
 13 1 -3 16.18 1.43
 13 1 -2 7.59 0.64
 13 1 -1 1.36 0.43
 13 1 0 15.3 0.7
 13 1 1 0.14 0.25
 13 1 2 0.51 0.44
 13 2 -12 15.43 1.34
 13 2 -10 6.64 0.51
 13 2 -9 6.72 0.64
 13 2 -8 6.86 0.57
 13 2 -7 36.22 1.15
 13 2 -6 0.52 0.35
 13 2 -5 33.02 1.47
 13 2 -4 8.42 0.61
 13 2 -3 38.78 2.01
 13 2 -2 7.31 0.55
 13 2 -1 27.85 1.63
 13 2 0 2.31 0.39
 13 2 1 55.82 1.95
 13 2 2 0.41 0.37
 13 3 -12 9.65 0.81
 13 3 -10 3.59 0.46
 13 3 -9 0.18 0.37
 13 3 -8 10.86 0.56
 13 3 -7 0.07 0.32
 13 3 -6 26.64 1.18
 13 3 -5 0.99 0.31
 13 3 -4 12.41 0.86
 13 3 -3 2.79 0.38
 13 3 -2 38.75 1.42
 13 3 -1 5.3 0.5
 13 3 0 23.9 1.75
 13 3 1 0.4 0.29
 13 4 -9 6.51 0.57
 13 4 -8 10.41 1
 13 4 -6 9.6 0.47
 13 4 -5 21.45 1.08
 13 4 -4 4.24 0.4
 13 4 -3 15.36 1.07
 13 4 -2 3.61 0.51
 13 4 -1 17.46 0.69
 13 4 0 -0.18 0.38
 13 5 -10 1.29 0.59
 13 5 -9 0.3 0.37
 13 5 -8 3.06 0.43
 13 5 -7 1.7 0.41
 13 5 -6 0.7 0.37
 13 5 -5 17.99 0.84
 13 5 -4 0.72 0.27
 13 5 -3 4.99 0.4
 13 5 -2 0.94 0.27
 13 5 -1 13.55 0.82
 13 6 -6 4.11 0.39
 13 6 -5 -0.28 0.29
 14 0 -10 16.34 1
 14 0 -9 -0.21 0.46
 14 0 -8 -0.56 0.43
 14 0 -7 0.19 0.47
 14 0 -6 -1.05 0.74
 14 0 -5 -1 0.63
 14 0 -4 2.43 0.47
 14 0 -3 0.38 0.4
 14 0 -2 -0.82 0.39
 14 1 -10 0.93 0.8
 14 1 -9 0.14 0.62
 14 1 -8 13.53 0.71
 14 1 -7 0.58 0.41
 14 1 -6 4.53 0.49
 14 1 -5 1.31 0.34
 14 1 -4 5.75 0.5
 14 1 -3 1.83 0.33
 14 1 -2 0.78 0.39
 14 2 -9 5.9 0.58
 14 2 -8 0.51 0.43
 14 2 -7 22.46 1.13
 14 2 -6 8.66 0.57
 14 2 -5 31.64 1.12
 14 2 -4 2.75 0.38
 14 2 -3 6.72 0.75
 14 3 -7 1.07 0.35
 14 3 -6 26.1 1.23
 14 3 -5 0.36 0.47

_iucr_refine_instructions_details
;

    1.res created by SHELXL-2014/7

TITL 1 in P2(1)/c
CELL 0.71073 10.488 10.412 15.057 90 107.132 90
ZERR 4 0.0021 0.00208 0.00301 0 0.03 0
LATT 1
SYMM -X,0.5+Y,0.5-Z
SFAC C H Cu F N O
UNIT 52 24 4 4 5 16
DFIX 1.18 0.01 N13 N14
SIMU 0.01 0.05 3.8 N13 N14
ISOR 0.01 0.05 N13 N14
 
L.S. 30
PLAN  20
BOND
fmap 2
acta
REM <olex2.extras>
REM <HklSrc "%.\\1.hkl">
REM </olex2.extras>
 
WGHT    0.123100    4.567400
FVAR       0.48212
O4    6    0.529834    0.173679    0.430366    11.00000    0.04091    0.06578 =
         0.05123    0.00463    0.01365   -0.00019
CU1   3    0.591820    0.589476    0.010645    11.00000    0.03468    0.05915 =
         0.04243    0.00006    0.00769    0.00030
C1    1    0.631519    0.416234    0.156872    11.00000    0.03743    0.06756 =
         0.04220    0.00302    0.01020    0.00470
C2    1    0.705829    0.358403    0.249051    11.00000    0.04026    0.06181 =
         0.04265    0.00251    0.00977    0.00133
C9    1    1.114394    0.466235    0.410934    11.00000    0.04267    0.06240 =
         0.05658    0.00315    0.01099    0.00206
AFIX  43
H9    2    1.060330    0.537758    0.391256    11.00000   -1.20000
AFIX   0
C4    1    0.913894    0.321540    0.368377    11.00000    0.03827    0.06210 =
         0.04915    0.00081    0.00945    0.00135
C5    1    0.849329    0.237032    0.411084    11.00000    0.03879    0.06600 =
         0.04661    0.00221    0.00882    0.00303
AFIX  43
H5    2    0.897801    0.192641    0.463827    11.00000   -1.20000
AFIX   0
C6    1    0.841544    0.381979    0.286959    11.00000    0.04105    0.06087 =
         0.04852    0.00201    0.01044   -0.00051
AFIX  43
H6    2    0.884256    0.438796    0.257475    11.00000   -1.20000
AFIX   0
C10   1    1.060367    0.344548    0.406977    11.00000    0.03803    0.06613 =
         0.04594    0.00578    0.00948    0.00011
C7    1    0.712011    0.217510    0.375919    11.00000    0.03983    0.06678 =
         0.04235   -0.00105    0.01163   -0.00023
F1    4    1.307516    0.595363    0.449559    11.00000    0.04475    0.06452 =
         0.09473   -0.00376    0.01161   -0.00631
C14   1    1.147516    0.241759    0.435891    11.00000    0.04010    0.06164 =
         0.04500    0.00282    0.01130   -0.00069
AFIX  43
H14   2    1.112083    0.159365    0.432139    11.00000   -1.20000
AFIX   0
C13   1    1.331594    0.374292    0.473554    11.00000    0.03799    0.06489 =
         0.05497   -0.00415    0.00826   -0.00225
AFIX  43
H13   2    1.423436    0.385501    0.496576    11.00000   -1.20000
AFIX   0
C12   1    1.251182    0.478082    0.445043    11.00000    0.04440    0.05925 =
         0.06461   -0.00267    0.01315   -0.00430
O3    6    0.522758    0.363105    0.114039    11.00000    0.04000    0.06865 =
         0.04579    0.00662    0.00563   -0.00216
O1    6    0.683894    0.510410    0.130338    11.00000    0.03948    0.06870 =
         0.04940    0.00484    0.00616   -0.00127
N3    5    1.279537    0.255873    0.468747    11.00000    0.03808    0.06236 =
         0.04519   -0.00069    0.00952    0.00030
O2    6    0.694267    0.026891    0.455354    11.00000    0.03951    0.07132 =
         0.05638    0.00971    0.01216    0.00166
C21   1    0.640194    0.132241    0.424388    11.00000    0.03548    0.06787 =
         0.04457    0.00223    0.00507   -0.00093
C20   1    0.641593    0.278141    0.293931    11.00000    0.03834    0.06579 =
         0.04644    0.00071    0.00922   -0.00191
AFIX  43
H20   2    0.550365    0.264163    0.269388    11.00000   -1.20000
AFIX   0
 
N13   5    0.869464    0.782669    0.328446    10.12500    0.13170    0.11485 =
         0.06673   -0.03485    0.03420    0.01574
N14   5    0.759206    0.789287    0.278638    10.12500    0.10658    0.12501 =
         0.06082   -0.02316    0.02407    0.00015
HKLF 4
 
REM  1 in P2(1)/c
REM R1 =  0.0756 for    3340 Fo > 4sig(Fo)  and  0.0813 for all    3807 data
REM    199 parameters refined using     19 restraints
 
END  
     
WGHT      0.1209      4.6351 

REM Highest difference peak  1.008,  deepest hole -1.562,  1-sigma level  0.112
Q1    1   0.5939  0.5218 -0.0292  11.00000  0.05    1.01
Q2    1   0.5918  0.5199  0.0564  11.00000  0.05    0.92
Q3    1   0.5944  0.6618  0.0523  11.00000  0.05    0.90
Q4    1   0.6894  0.5957  0.0360  11.00000  0.05    0.87
Q5    1   0.5861  0.6592 -0.0350  11.00000  0.05    0.83
Q6    1   1.4127  0.4068  0.5649  11.00000  0.05    0.82
Q7    1   1.4142  0.4131  0.4094  11.00000  0.05    0.82
Q8    1   0.4917  0.5947 -0.0108  11.00000  0.05    0.71
Q9    1   0.5160  0.1006  0.4755  11.00000  0.05    0.68
Q10   1   0.6774 -0.0219  0.4897  11.00000  0.05    0.59
Q11   1   0.4013  0.4080  0.1358  11.00000  0.05    0.52
Q12   1   0.5782  0.5943  0.1739  11.00000  0.05    0.43
Q13   1   0.9345  0.9266  0.3560  11.00000  0.05    0.41
Q14   1   0.6831  0.6282 -0.0281  11.00000  0.05    0.40
Q15   1   0.4889  0.4074  0.0831  11.00000  0.05    0.39
Q16   1   0.4217  0.4113  0.0824  11.00000  0.05    0.37
Q17   1   0.5383  0.1249  0.3954  11.00000  0.05    0.36
Q18   1   0.6528  0.5763  0.1001  11.00000  0.05    0.35
Q19   1   0.6995  0.4177  0.0581  11.00000  0.05    0.34
Q20   1   0.7689  0.3548  0.2702  11.00000  0.05    0.34

  REM The information below was added by Olex2.
  REM
  REM R1 = 0.0756 for 3340 Fo > 4sig(Fo) and 0.0813 for all 3973 data
  REM n/a parameters refined using n/a restraints
  REM Highest difference peak 1.01, deepest hole -1.56
  REM Mean Shift 0, Max Shift 0.000.

  REM +++ Tabular Listing of Refinement Information +++
  REM R1_all = 0.0813
  REM R1_gt = 0.0756
  REM wR_ref = 0.2517
  REM GOOF = 1.109
  REM Shift_max = 0.000
  REM Shift_mean = 0
  REM Reflections_all = 3973
  REM Reflections_gt = 3340
  REM Parameters = n/a
  REM Hole = -1.56
  REM Peak = 1.01
  REM Flack = n/a

  
;
_olex2_submission_special_instructions  'No special instructions were received'
