# Supplementary material
Source: publisher figshare collection journal article supplement (https://acs.figshare.com/ndownloader/files/18064346)
Supplement: Supplementary file 1 [file 18064346 › NKU-FlexMOF-1a-N2-b.cif]

data_NKU-FlexMOF-1a-N2-b
_audit_creation_date               2018-11-22
_audit_creation_method
;
Olex2 1.2
(compiled 2018.05.29 svn.r3508 for OlexSys, GUI svn.r5506)
;
_shelx_SHELXL_version_number       '2014/7'
_audit_contact_author_address      ?
_audit_contact_author_email        ?
_audit_contact_author_name         ''
_audit_contact_author_phone        ?
_publ_contact_author_id_orcid      ?
_publ_section_references
;
Dolomanov, O.V., Bourhis, L.J., Gildea, R.J, Howard, J.A.K. & Puschmann, H.
 (2009), J. Appl. Cryst. 42, 339-341.

Sheldrick, G.M. (2015). Acta Cryst. C71, 3-8.
;
_chemical_name_common              ?
_chemical_name_systematic          ?
_chemical_formula_moiety           'C13 H6 Cu F N O4, 3(N2)'
_chemical_formula_sum              'C13 H6 Cu F N7 O4'
_chemical_formula_weight           406.79
_chemical_melting_point            ?
loop_
  _atom_type_symbol
  _atom_type_description
  _atom_type_scat_dispersion_real
  _atom_type_scat_dispersion_imag
  _atom_type_scat_source
 'C' 'C' 0.0181 0.0091 'International Tables Vol C Tables 4.2.6.8 and 6.1.1.4'
 'H' 'H' 0.0000 0.0000 'International Tables Vol C Tables 4.2.6.8 and 6.1.1.4'
 'Cu' 'Cu' -1.9646 0.5888
 'International Tables Vol C Tables 4.2.6.8 and 6.1.1.4'
 'F' 'F' 0.0727 0.0534 'International Tables Vol C Tables 4.2.6.8 and 6.1.1.4'
 'N' 'N' 0.0311 0.0180 'International Tables Vol C Tables 4.2.6.8 and 6.1.1.4'
 'O' 'O' 0.0492 0.0322 'International Tables Vol C Tables 4.2.6.8 and 6.1.1.4'

_shelx_space_group_comment
;
The symmetry employed for this shelxl refinement is uniquely defined
by the following loop, which should always be used as a source of
symmetry information in preference to the above space-group names.
They are only intended as comments.
;
_space_group_crystal_system        'monoclinic'
_space_group_IT_number             14
_space_group_name_H-M_alt          'P 1 21/c 1'
_space_group_name_Hall             '-P 2ybc'
loop_
  _space_group_symop_operation_xyz
 'x, y, z'
 '-x, y+1/2, -z+1/2'
 '-x, -y, -z'
 'x, -y-1/2, z-1/2'

_cell_length_a                     10.5629(2)
_cell_length_b                     11.3332(2)
_cell_length_c                     14.6254(3)
_cell_angle_alpha                  90
_cell_angle_beta                   108.254(2)
_cell_angle_gamma                  90
_cell_volume                       1662.72(6)
_cell_formula_units_Z              4
_cell_measurement_reflns_used      5491
_cell_measurement_temperature      99.99(10)
_cell_measurement_theta_max        73.8310
_cell_measurement_theta_min        5.9130
_shelx_estimated_absorpt_T_max     ?
_shelx_estimated_absorpt_T_min     ?
_exptl_absorpt_coefficient_mu      2.302
_exptl_absorpt_correction_T_max    1.00000
_exptl_absorpt_correction_T_min    0.24602
_exptl_absorpt_correction_type     multi-scan
_exptl_absorpt_process_details
;
CrysAlisPro 1.171.39.9d (Rigaku Oxford Diffraction, 2015)
Empirical absorption correction using spherical harmonics,
 implemented in SCALE3 ABSPACK scaling algorithm.
;
_exptl_absorpt_special_details     ?
_exptl_crystal_colour              blue
_exptl_crystal_colour_primary      blue
_exptl_crystal_density_diffrn      1.625
_exptl_crystal_density_meas        ?
_exptl_crystal_density_method      ?
_exptl_crystal_description         block
_exptl_crystal_F_000               812
_exptl_crystal_size_max            0.1
_exptl_crystal_size_mid            0.08
_exptl_crystal_size_min            0.06
_exptl_transmission_factor_max     ?
_exptl_transmission_factor_min     ?
_diffrn_reflns_av_R_equivalents    0.0281
_diffrn_reflns_av_unetI/netI       0.0363
_diffrn_reflns_Laue_measured_fraction_full  0.998
_diffrn_reflns_Laue_measured_fraction_max  0.964
_diffrn_reflns_limit_h_max         12
_diffrn_reflns_limit_h_min         -11
_diffrn_reflns_limit_k_max         14
_diffrn_reflns_limit_k_min         -13
_diffrn_reflns_limit_l_max         16
_diffrn_reflns_limit_l_min         -18
_diffrn_reflns_number              9425
_diffrn_reflns_point_group_measured_fraction_full  0.998
_diffrn_reflns_point_group_measured_fraction_max  0.964
_diffrn_reflns_theta_full          67.684
_diffrn_reflns_theta_max           74.581
_diffrn_reflns_theta_min           4.408
_diffrn_ambient_environment        N~2~
_diffrn_ambient_temperature        99.99(10)
_diffrn_detector                   'CCD plate'
_diffrn_detector_area_resol_mean   ?
_diffrn_measured_fraction_theta_full  0.998
_diffrn_measured_fraction_theta_max  0.964
_diffrn_measurement_details
;
List of Runs (angles in degrees, time in seconds):

  # Type    Start    End  Width  t~exp~   \w     \q     \k     \f   Frames
--------------------------------------------------------------------------
  1  \w    -17.00  10.00   0.50    2.50    --    0.00 -57.00 -60.00   54
  2  \w     11.00 113.00   0.50    5.00    --   94.90 -30.00 150.00  204
  3  \w     89.00 160.00   0.50    5.00    --   94.90  45.00   0.00  142
  4  \w    146.00 174.00   0.50    5.00    --   94.90  77.00 -90.00   56
  5  \w    110.00 142.00   0.50    5.00    --   94.90  77.00 -90.00   64
  6  \w     69.00 132.00   0.50    5.00    --   94.90  61.00  60.00  126
  7  \w     47.00 127.00   0.50    5.00    --   94.90 -82.00 -90.00  160
  8  \w      7.00  95.00   0.50    5.00    --   94.90 -61.00  90.00  176
  9  \w      9.00  34.00   0.50    5.00    --   94.90 -82.00 -90.00   50
 10  \w      6.00 103.00   0.50    5.00    --   94.90 -30.00 -90.00  194
 11  \w    -10.00  18.00   0.50    2.50    --    0.00  82.00   0.00   56
 12  \w    -87.00 -30.00   0.50    2.50    --    0.00 -38.00-120.00  114
 13  \w    -89.00 -24.00   0.50    2.50    --    0.00 -57.00 -60.00  130
;
_diffrn_measurement_device         'four-circle diffractometer'
_diffrn_measurement_device_type    'XtaLAB Pro: Kappa single'
_diffrn_measurement_method         '\w scans'
_diffrn_orient_matrix_type        
 'CrysAlisPro convention (1999,Acta A55,543-557)'
_diffrn_orient_matrix_UB_11        -0.1018549000
_diffrn_orient_matrix_UB_12        0.0510945000
_diffrn_orient_matrix_UB_13        0.0450653000
_diffrn_orient_matrix_UB_21        0.1026041000
_diffrn_orient_matrix_UB_22        -0.0122792000
_diffrn_orient_matrix_UB_23        0.1009349000
_diffrn_orient_matrix_UB_31        0.0518516000
_diffrn_orient_matrix_UB_32        0.1253883000
_diffrn_orient_matrix_UB_33        -0.0085201000
_diffrn_radiation_monochromator    graphite
_diffrn_radiation_probe            x-ray
_diffrn_radiation_type             CuK\a
_diffrn_radiation_wavelength       1.54184
_diffrn_source                     'fine-focus sealed X-ray tube'
_diffrn_source_type                'Enhance (Cu) X-ray Source'
_reflns_Friedel_coverage           0.000
_reflns_Friedel_fraction_full      .
_reflns_Friedel_fraction_max       .
_reflns_number_gt                  2815
_reflns_number_total               3283
_reflns_odcompleteness_completeness  99.90
_reflns_odcompleteness_iscentric   1
_reflns_odcompleteness_theta       66.97
_reflns_special_details
;
 Reflections were merged by SHELXL according to the crystal
 class for the calculation of statistics and refinement.
 
 _reflns_Friedel_fraction is defined as the number of unique
 Friedel pairs measured divided by the number that would be
 possible theoretically, ignoring centric projections and
 systematic absences.
;
_reflns_threshold_expression       'I > 2\s(I)'
_computing_cell_refinement         'CrysAlisPro 1.171.39.9d (Rigaku OD, 2015)'
_computing_data_collection         'CrysAlisPro 1.171.39.9d (Rigaku OD, 2015)'
_computing_data_reduction          'CrysAlisPro 1.171.39.9d (Rigaku OD, 2015)'
_computing_molecular_graphics      'Olex2 (Dolomanov et al., 2009)'
_computing_publication_material    'Olex2 (Dolomanov et al., 2009)'
_computing_structure_refinement    'ShelXL (Sheldrick, 2015)'
_computing_structure_solution      'SHELXT 2014/5 (Sheldrick, 2014)'
_refine_diff_density_max           1.278
_refine_diff_density_min           -0.876
_refine_diff_density_rms           0.117
_refine_ls_extinction_coef         .
_refine_ls_extinction_method       none
_refine_ls_goodness_of_fit_ref     1.041
_refine_ls_hydrogen_treatment      constr
_refine_ls_matrix_type             full
_refine_ls_number_parameters       235
_refine_ls_number_reflns           3283
_refine_ls_number_restraints       0
_refine_ls_R_factor_all            0.0652
_refine_ls_R_factor_gt             0.0571
_refine_ls_restrained_S_all        1.041
_refine_ls_shift/su_max            0.001
_refine_ls_shift/su_mean           0.000
_refine_ls_structure_factor_coef   Fsqd
_refine_ls_weighting_details      
 'w=1/[\s^2^(Fo^2^)+(0.0990P)^2^+4.1854P] where P=(Fo^2^+2Fc^2^)/3'
_refine_ls_weighting_scheme        calc
_refine_ls_wR_factor_gt            0.1605
_refine_ls_wR_factor_ref           0.1666
_refine_special_details            ?
_olex2_refinement_description
;
1. Fixed Uiso
 At 1.2 times of:
  All C(H) groups
2.a Aromatic/amide H refined with riding coordinates:
 C00C(H00C), C00D(H00D), C00F(H00F), C00H(H00H), C00I(H00I), C00K(H00K)
;
_atom_sites_solution_hydrogens     geom
_atom_sites_solution_primary       ?
_atom_sites_solution_secondary     ?
loop_
  _atom_site_label
  _atom_site_type_symbol
  _atom_site_fract_x
  _atom_site_fract_y
  _atom_site_fract_z
  _atom_site_U_iso_or_equiv
  _atom_site_adp_type
  _atom_site_occupancy
  _atom_site_site_symmetry_order
  _atom_site_calc_flag
  _atom_site_refinement_flags_posn
  _atom_site_refinement_flags_adp
  _atom_site_refinement_flags_occupancy
  _atom_site_disorder_assembly
  _atom_site_disorder_group
 Cu01 Cu 0.09657(5) 0.42113(5) 0.51381(3) 0.0185(2) Uani 1 1 d . . . . .
 O002 O 0.0216(2) 0.6637(2) 0.42661(19) 0.0252(6) Uani 1 1 d . . . . .
 O003 O 0.0171(2) 0.8718(2) 0.11587(18) 0.0250(6) Uani 1 1 d . . . . .
 O004 O 0.1915(2) 0.5345(2) 0.45704(19) 0.0252(6) Uani 1 1 d . . . . .
 F005 F 0.8155(2) 1.0458(2) 0.4857(2) 0.0436(7) Uani 1 1 d . . . . .
 O006 O 0.1847(2) 1.0014(2) 0.13788(18) 0.0253(6) Uani 1 1 d . . . . .
 N007 N 0.7750(3) 0.7327(3) 0.4706(2) 0.0216(6) Uani 1 1 d . . . . .
 C008 C 0.1346(3) 0.6308(4) 0.4246(2) 0.0229(7) Uani 1 1 d . . . . .
 C009 C 0.1291(3) 0.9149(3) 0.1629(3) 0.0214(7) Uani 1 1 d . . . . .
 C00A C 0.4112(3) 0.8089(3) 0.3771(3) 0.0228(7) Uani 1 1 d . . . . .
 C00B C 0.2026(3) 0.8541(3) 0.2552(3) 0.0223(7) Uani 1 1 d . . . . .
 C00C C 0.3390(3) 0.8728(4) 0.2962(3) 0.0238(8) Uani 1 1 d . . . . .
 H00C H 0.3821 0.9281 0.2695 0.029 Uiso 1 1 calc R . . . .
 C00D C 0.3449(3) 0.7270(4) 0.4174(3) 0.0236(8) Uani 1 1 d . . . . .
 H00D H 0.3928 0.6816 0.4698 0.028 Uiso 1 1 calc R . . . .
 C00E C 0.5582(3) 0.8236(4) 0.4174(3) 0.0237(8) Uani 1 1 d . . . . .
 C00F C 0.8316(4) 0.8398(4) 0.4859(3) 0.0269(8) Uani 1 1 d . . . . .
 H00F H 0.9240 0.8463 0.5085 0.032 Uiso 1 1 calc R . . . .
 C00G C 0.2069(3) 0.7132(3) 0.3792(3) 0.0232(7) Uani 1 1 d . . . . .
 C00H C 0.1363(3) 0.7770(3) 0.2979(3) 0.0222(7) Uani 1 1 d . . . . .
 H00H H 0.0445 0.7678 0.2722 0.027 Uiso 1 1 calc R . . . .
 C00I C 0.6420(3) 0.7255(3) 0.4380(3) 0.0226(7) Uani 1 1 d . . . . .
 H00I H 0.6032 0.6509 0.4285 0.027 Uiso 1 1 calc R . . . .
 C00J C 0.7550(4) 0.9394(4) 0.4687(3) 0.0310(9) Uani 1 1 d . . . . .
 C00K C 0.6175(4) 0.9344(4) 0.4336(3) 0.0289(9) Uani 1 1 d . . . . .
 H00K H 0.5664 1.0028 0.4212 0.035 Uiso 1 1 calc R . . . .
 N00L N 0.9731(8) 0.0256(6) 0.3069(5) 0.0820(18) Uani 1 1 d . . . . .
 N00M N 0.7553(9) 0.7138(8) 0.2083(6) 0.106(3) Uani 1 1 d . . . . .
 N00N N 0.8880(9) -0.0181(9) 0.2991(7) 0.106(3) Uani 1 1 d . . . . .
 N00O N 0.6648(11) 0.6790(8) 0.1826(6) 0.114(3) Uani 1 1 d . . . . .
 N00P N 0.5625(9) 0.9362(9) 0.1259(8) 0.118(3) Uani 1 1 d . . . . .
 N00Q N 0.5837(11) 0.9862(10) 0.1901(8) 0.127(3) Uani 1 1 d . . . . .

loop_
  _atom_site_aniso_label
  _atom_site_aniso_U_11
  _atom_site_aniso_U_22
  _atom_site_aniso_U_33
  _atom_site_aniso_U_23
  _atom_site_aniso_U_13
  _atom_site_aniso_U_12
 Cu01 0.0142(3) 0.0249(3) 0.0162(3) -0.0004(2) 0.0043(2) -0.00010(19)
 O002 0.0201(12) 0.0299(14) 0.0277(13) 0.0051(11) 0.0105(10) 0.0018(10)
 O003 0.0193(12) 0.0312(15) 0.0225(12) 0.0056(11) 0.0036(10) -0.0015(10)
 O004 0.0200(12) 0.0295(14) 0.0268(13) 0.0056(11) 0.0083(10) 0.0023(11)
 F005 0.0257(12) 0.0286(13) 0.0718(19) -0.0073(13) 0.0086(12) -0.0049(10)
 O006 0.0200(12) 0.0314(15) 0.0229(12) 0.0072(11) 0.0047(10) -0.0022(10)
 N007 0.0155(13) 0.0253(16) 0.0241(15) -0.0002(12) 0.0062(11) 0.0027(12)
 C008 0.0185(16) 0.031(2) 0.0181(16) -0.0026(15) 0.0033(13) -0.0010(14)
 C009 0.0152(16) 0.032(2) 0.0166(16) 0.0007(14) 0.0040(13) 0.0034(14)
 C00A 0.0170(16) 0.0276(19) 0.0230(17) 0.0026(15) 0.0050(13) 0.0018(14)
 C00B 0.0186(16) 0.029(2) 0.0196(16) 0.0002(15) 0.0060(13) 0.0011(14)
 C00C 0.0185(17) 0.032(2) 0.0223(17) 0.0035(15) 0.0077(14) -0.0002(15)
 C00D 0.0189(17) 0.031(2) 0.0200(16) 0.0072(15) 0.0042(13) 0.0018(14)
 C00E 0.0159(16) 0.030(2) 0.0246(17) 0.0031(15) 0.0051(13) 0.0013(14)
 C00F 0.0164(16) 0.026(2) 0.037(2) -0.0028(16) 0.0065(15) -0.0020(14)
 C00G 0.0187(16) 0.029(2) 0.0219(16) -0.0003(15) 0.0069(13) 0.0008(14)
 C00H 0.0152(15) 0.032(2) 0.0199(16) 0.0015(15) 0.0059(13) -0.0001(14)
 C00I 0.0176(16) 0.0259(19) 0.0228(17) 0.0024(14) 0.0040(13) -0.0003(14)
 C00J 0.0226(19) 0.030(2) 0.039(2) -0.0023(17) 0.0062(17) -0.0044(15)
 C00K 0.0217(18) 0.030(2) 0.035(2) 0.0033(17) 0.0091(16) 0.0024(15)
 N00L 0.097(5) 0.065(4) 0.079(4) 0.002(3) 0.021(4) 0.019(4)
 N00M 0.097(6) 0.124(7) 0.078(5) 0.027(4) 0.002(4) -0.030(5)
 N00N 0.101(6) 0.118(7) 0.115(6) 0.027(5) 0.057(5) -0.003(5)
 N00O 0.139(8) 0.100(6) 0.086(5) 0.016(5) 0.010(5) -0.024(6)
 N00P 0.087(5) 0.134(8) 0.122(7) -0.051(6) 0.016(5) 0.002(5)
 N00Q 0.139(8) 0.131(9) 0.119(8) 0.029(6) 0.052(7) -0.002(7)

_geom_special_details
;
 All esds (except the esd in the dihedral angle between two l.s. planes)
 are estimated using the full covariance matrix.  The cell esds are taken
 into account individually in the estimation of esds in distances, angles
 and torsion angles; correlations between esds in cell parameters are only
 used when they are defined by crystal symmetry.  An approximate (isotropic)
 treatment of cell esds is used for estimating esds involving l.s. planes.
;
loop_
  _geom_bond_atom_site_label_1
  _geom_bond_atom_site_label_2
  _geom_bond_distance
  _geom_bond_site_symmetry_2
  _geom_bond_publ_flag
 Cu01 Cu01 2.6467(10) 3_566 ?
 Cu01 O002 1.981(3) 3_566 ?
 Cu01 O003 1.981(3) 2_545 ?
 Cu01 O004 1.966(3) . ?
 Cu01 O006 1.968(3) 4_576 ?
 Cu01 N007 2.177(3) 3_666 ?
 O002 Cu01 1.981(3) 3_566 ?
 O002 C008 1.260(4) . ?
 O003 Cu01 1.981(3) 2 ?
 O003 C009 1.266(4) . ?
 O004 C008 1.264(5) . ?
 F005 C00J 1.351(5) . ?
 O006 Cu01 1.968(3) 4_575 ?
 O006 C009 1.255(5) . ?
 N007 Cu01 2.177(3) 3_666 ?
 N007 C00F 1.341(5) . ?
 N007 C00I 1.337(5) . ?
 C008 C00G 1.489(5) . ?
 C009 C00B 1.498(5) . ?
 C00A C00C 1.393(5) . ?
 C00A C00D 1.400(5) . ?
 C00A C00E 1.488(5) . ?
 C00B C00C 1.392(5) . ?
 C00B C00H 1.385(5) . ?
 C00C H00C 0.9300 . ?
 C00D H00D 0.9300 . ?
 C00D C00G 1.397(5) . ?
 C00E C00I 1.393(5) . ?
 C00E C00K 1.390(6) . ?
 C00F H00F 0.9300 . ?
 C00F C00J 1.365(6) . ?
 C00G C00H 1.391(5) . ?
 C00H H00H 0.9300 . ?
 C00I H00I 0.9300 . ?
 C00J C00K 1.382(5) . ?
 C00K H00K 0.9300 . ?
 N00L N00N 1.001(9) . ?
 N00M N00O 0.993(10) . ?
 N00P N00Q 1.058(12) . ?

loop_
  _geom_angle_atom_site_label_1
  _geom_angle_atom_site_label_2
  _geom_angle_atom_site_label_3
  _geom_angle
  _geom_angle_site_symmetry_1
  _geom_angle_site_symmetry_3
  _geom_angle_publ_flag
 O002 Cu01 Cu01 80.40(8) 3_566 3_566 ?
 O002 Cu01 O003 90.44(11) 3_566 2_545 ?
 O002 Cu01 N007 91.34(11) 3_566 3_666 ?
 O003 Cu01 Cu01 80.65(8) 2_545 3_566 ?
 O003 Cu01 N007 92.59(11) 2_545 3_666 ?
 O004 Cu01 Cu01 87.98(8) . 3_566 ?
 O004 Cu01 O002 167.91(11) . 3_566 ?
 O004 Cu01 O003 90.94(11) . 2_545 ?
 O004 Cu01 O006 86.64(11) . 4_576 ?
 O004 Cu01 N007 100.60(11) . 3_666 ?
 O006 Cu01 Cu01 87.65(8) 4_576 3_566 ?
 O006 Cu01 O002 89.56(11) 4_576 3_566 ?
 O006 Cu01 O003 168.13(11) 4_576 2_545 ?
 O006 Cu01 N007 99.28(11) 4_576 3_666 ?
 N007 Cu01 Cu01 169.22(9) 3_666 3_566 ?
 C008 O002 Cu01 126.7(3) . 3_566 ?
 C009 O003 Cu01 126.5(2) . 2 ?
 C008 O004 Cu01 118.5(2) . . ?
 C009 O006 Cu01 119.2(2) . 4_575 ?
 C00F N007 Cu01 118.5(2) . 3_666 ?
 C00I N007 Cu01 122.7(3) . 3_666 ?
 C00I N007 C00F 118.6(3) . . ?
 O002 C008 O004 126.2(3) . . ?
 O002 C008 C00G 116.5(3) . . ?
 O004 C008 C00G 117.4(3) . . ?
 O003 C009 C00B 116.4(3) . . ?
 O006 C009 O003 125.9(3) . . ?
 O006 C009 C00B 117.7(3) . . ?
 C00C C00A C00D 119.3(3) . . ?
 C00C C00A C00E 120.3(3) . . ?
 C00D C00A C00E 120.4(3) . . ?
 C00C C00B C009 119.5(3) . . ?
 C00H C00B C009 120.3(3) . . ?
 C00H C00B C00C 120.2(3) . . ?
 C00A C00C H00C 119.9 . . ?
 C00B C00C C00A 120.3(3) . . ?
 C00B C00C H00C 119.9 . . ?
 C00A C00D H00D 119.9 . . ?
 C00G C00D C00A 120.2(3) . . ?
 C00G C00D H00D 119.9 . . ?
 C00I C00E C00A 120.6(3) . . ?
 C00K C00E C00A 121.8(3) . . ?
 C00K C00E C00I 117.5(3) . . ?
 N007 C00F H00F 119.7 . . ?
 N007 C00F C00J 120.7(3) . . ?
 C00J C00F H00F 119.7 . . ?
 C00D C00G C008 120.5(3) . . ?
 C00H C00G C008 119.7(3) . . ?
 C00H C00G C00D 119.8(3) . . ?
 C00B C00H C00G 120.1(3) . . ?
 C00B C00H H00H 119.9 . . ?
 C00G C00H H00H 119.9 . . ?
 N007 C00I C00E 123.6(3) . . ?
 N007 C00I H00I 118.2 . . ?
 C00E C00I H00I 118.2 . . ?
 F005 C00J C00F 119.1(3) . . ?
 F005 C00J C00K 119.1(4) . . ?
 C00F C00J C00K 121.8(4) . . ?
 C00E C00K H00K 121.1 . . ?
 C00J C00K C00E 117.8(4) . . ?
 C00J C00K H00K 121.1 . . ?

_shelx_res_file
;
    cu-n2.res created by SHELXL-2014/7

TITL cu-n2_a.res in P2(1)/c
CELL 1.54184 10.5629 11.3332 14.6254 90 108.254 90
ZERR 4 0.0002 0.0002 0.0003 0 0.002 0
LATT 1
SYMM -X,0.5+Y,0.5-Z
SFAC C H Cu F N O
UNIT 52 24 4 4 28 16

L.S. 10
PLAN  20
BOND $H
LIST 4
fmap 2
acta
REM <olex2.extras>
REM <HklSrc "%.\\CU-N2.hkl">
REM </olex2.extras>

WGHT    0.099000    4.185400
FVAR       0.57942
CU01  3    0.096571    0.421134    0.513810    11.00000    0.01419    0.02489 =
         0.01620   -0.00039    0.00426   -0.00010
O002  6    0.021626    0.663733    0.426610    11.00000    0.02007    0.02986 =
         0.02774    0.00512    0.01050    0.00185
O003  6    0.017077    0.871802    0.115871    11.00000    0.01931    0.03116 =
         0.02251    0.00561    0.00358   -0.00147
O004  6    0.191465    0.534498    0.457043    11.00000    0.01998    0.02948 =
         0.02681    0.00558    0.00827    0.00227
F005  4    0.815510    1.045812    0.485691    11.00000    0.02570    0.02863 =
         0.07185   -0.00727    0.00855   -0.00491
O006  6    0.184724    1.001432    0.137881    11.00000    0.01999    0.03145 =
         0.02292    0.00721    0.00469   -0.00219
N007  5    0.774962    0.732656    0.470616    11.00000    0.01551    0.02528 =
         0.02412   -0.00020    0.00619    0.00275
C008  1    0.134623    0.630758    0.424647    11.00000    0.01851    0.03054 =
         0.01808   -0.00258    0.00335   -0.00105
C009  1    0.129099    0.914949    0.162894    11.00000    0.01521    0.03164 =
         0.01658    0.00070    0.00403    0.00344
C00A  1    0.411209    0.808886    0.377119    11.00000    0.01699    0.02765 =
         0.02302    0.00256    0.00504    0.00178
C00B  1    0.202609    0.854126    0.255240    11.00000    0.01863    0.02873 =
         0.01963    0.00017    0.00598    0.00108
C00C  1    0.339008    0.872761    0.296250    11.00000    0.01848    0.03169 =
         0.02226    0.00351    0.00765   -0.00024
AFIX  43
H00C  2    0.382088    0.928112    0.269517    11.00000   -1.20000
AFIX   0
C00D  1    0.344874    0.726963    0.417415    11.00000    0.01889    0.03064 =
         0.02003    0.00722    0.00421    0.00178
AFIX  43
H00D  2    0.392797    0.681550    0.469786    11.00000   -1.20000
AFIX   0
C00E  1    0.558217    0.823567    0.417363    11.00000    0.01591    0.02977 =
         0.02461    0.00306    0.00513    0.00133
C00F  1    0.831590    0.839779    0.485929    11.00000    0.01640    0.02588 =
         0.03699   -0.00279    0.00646   -0.00197
AFIX  43
H00F  2    0.923974    0.846295    0.508505    11.00000   -1.20000
AFIX   0
C00G  1    0.206905    0.713245    0.379177    11.00000    0.01871    0.02931 =
         0.02194   -0.00028    0.00686    0.00080
C00H  1    0.136342    0.776990    0.297938    11.00000    0.01525    0.03181 =
         0.01993    0.00148    0.00586   -0.00012
AFIX  43
H00H  2    0.044495    0.767799    0.272242    11.00000   -1.20000
AFIX   0
C00I  1    0.641971    0.725494    0.437960    11.00000    0.01757    0.02589 =
         0.02281    0.00241    0.00399   -0.00034
AFIX  43
H00I  2    0.603228    0.650949    0.428469    11.00000   -1.20000
AFIX   0
C00J  1    0.755030    0.939403    0.468721    11.00000    0.02262    0.02955 =
         0.03852   -0.00228    0.00618   -0.00439
C00K  1    0.617547    0.934355    0.433576    11.00000    0.02169    0.03043 =
         0.03468    0.00332    0.00908    0.00238
AFIX  43
H00K  2    0.566404    1.002791    0.421179    11.00000   -1.20000
AFIX   0

N00L  5    0.973125    0.025575    0.306886    11.00000    0.09715    0.06537 =
         0.07885    0.00201    0.02098    0.01950
N00M  5    0.755257    0.713826    0.208339    11.00000    0.09690    0.12391 =
         0.07808    0.02712    0.00202   -0.03030
N00N  5    0.888045   -0.018089    0.299053    11.00000    0.10102    0.11779 =
         0.11545    0.02697    0.05704   -0.00253
N00O  5    0.664775    0.678953    0.182592    11.00000    0.13914    0.10038 =
         0.08558    0.01622    0.01010   -0.02430
N00P  5    0.562495    0.936229    0.125930    11.00000    0.08698    0.13446 =
         0.12224   -0.05127    0.01642    0.00192
N00Q  5    0.583656    0.986247    0.190061    11.00000    0.13927    0.13132 =
         0.11889    0.02852    0.05160   -0.00196
HKLF 4

REM  cu-n2_a.res in P2(1)/c
REM R1 =  0.0571 for    2815 Fo > 4sig(Fo)  and  0.0652 for all    3283 data
REM    235 parameters refined using      0 restraints

END

WGHT      0.0988      4.1973

REM Highest difference peak  1.278,  deepest hole -0.876,  1-sigma level  0.117
Q1    1   0.5923  0.7759  0.1737  11.00000  0.05    1.28
Q2    1   0.1071  0.4269  0.4248  11.00000  0.05    0.65
Q3    1   0.8274  0.6768  0.4663  11.00000  0.05    0.61
Q4    1   0.1441  0.5013  0.4710  11.00000  0.05    0.58
Q5    1   0.1405  0.3391  0.4728  11.00000  0.05    0.57
Q6    1   0.0000  0.5000  0.5000  10.50000  0.05    0.54
Q7    1   0.0832  0.5050  0.5652  11.00000  0.05    0.53
Q8    1  -0.0609  0.6605  0.4431  11.00000  0.05    0.53
Q9    1  -0.0219  0.6745  0.4994  11.00000  0.05    0.51
Q10   1   0.0885  1.0803  0.1040  11.00000  0.05    0.51
Q11   1   0.1616  0.5202  0.5340  11.00000  0.05    0.50
Q12   1   0.2164  0.4157  0.4992  11.00000  0.05    0.49
Q13   1   0.0854  0.3488  0.4563  11.00000  0.05    0.46
Q14   1   0.0096  0.9205  0.0748  11.00000  0.05    0.45
Q15   1   0.1479  1.0375  0.1071  11.00000  0.05    0.42
Q16   1   0.0023  0.5898  0.4538  11.00000  0.05    0.40
Q17   1   0.7834 -0.0389  0.2607  11.00000  0.05    0.38
Q18   1   0.1965  0.9521  0.1157  11.00000  0.05    0.36
Q19   1  -0.0145  0.7652  0.0890  11.00000  0.05    0.34
Q20   1   0.3815  0.7784  0.3912  11.00000  0.05    0.33
;
_shelx_res_checksum                44318
_shelx_hkl_file
;
   0   0  -2 8824.31  371.94
   0   0  -3    1.62    3.29
   0   0  -4 2187.33   92.97
   0   0  -5    0.86    3.95
   0   0   5    2.11    3.59
   0   0  -6 1062.18   45.80
   0   0  -6 1034.99   45.86
   0   0   6 1062.32   45.76
   0   0  -7    2.52    3.02
   0   0   7    3.71    3.96
   0   0  -7    4.12    3.99
   0   0  -7   -0.30    4.18
   0   0  -7    1.35    4.13
   0   0  -7    0.98    3.09
   0   0  -8  222.57   11.23
   0   0  -8  196.04   11.69
   0   0  -8  228.74   10.48
   0   0   8  209.51   11.77
   0   0  -8  221.01   10.39
   0   0  -8  203.36   11.63
   0   0  -9    4.44    6.01
   0   0  -9    1.31    4.40
   0   0  -9   -0.37    3.95
   0   0 -10  651.55   30.02
   0   0 -10  669.74   29.43
   0   0 -11   -0.64    5.80
   0   0 -11    2.45    7.68
   0   0 -12   19.25    6.06
   0   0 -12   21.68    7.98
   0   0 -13   -1.27    5.12
   0   0 -13  -10.13    6.95
   0   0 -14  160.38   10.04
   0   0 -14  160.90    9.23
   0   0 -15   -4.27    4.13
   0   0 -15    7.95    5.19
   0   0 -16   81.77    5.46
   0   0 -16   72.62    4.88
   0   0 -17    1.25    2.72
   0   1  -1 3409.93  145.27
   0  -1   1 3478.45  145.26
   0  -1  -2 3855.59  156.55
   0  -1   2 3722.62  156.52
   0   1  -2 3663.68  156.57
   0  -1   2 3579.29  156.57
   0   1  -3  364.50   16.73
   0  -1   3  403.40   16.57
   0   1  -3  376.40   16.65
   0  -1  -3  339.93   16.55
   0   1  -4 6233.53  270.32
   0   1  -4 6244.42  270.32
   0  -1  -4 6695.21  270.26
   0   1  -5  277.97   13.06
   0  -1  -5  263.85   12.77
   0  -1  -6 1456.57   61.01
   0   1  -6 1450.16   61.08
   0   1  -6 1379.21   60.09
   0  -1  -6 1423.26   60.86
   0   1  -7 1812.44   78.96
   0   1  -7 1835.24   79.81
   0  -1  -7 1878.39   78.66
   0  -1  -7 1896.82   79.72
   0   1  -7 1859.39   78.72
   0   1  -7 1869.97   78.72
   0  -1  -7 1823.61   78.97
   0  -1  -7 1842.11   78.64
   0  -1  -7 1841.25   79.75
   0   1  -8    7.68    4.86
   0  -1  -8    2.53    4.69
   0  -1  -8    5.61    3.30
   0  -1  -8   -1.39    4.30
   0  -1  -8   -1.96    4.80
   0  -1  -8    5.23    3.45
   0   1  -8   -0.73    4.73
   0   1  -8   -0.11    3.57
   0   1  -8   -0.56    3.85
   0  -1  -9   69.37    7.10
   0   1  -9   59.22    6.76
   0   1  -9   69.50    6.08
   0  -1  -9   67.20    5.38
   0  -1  -9   68.15    5.41
   0   1 -10   80.93    6.95
   0   1 -10   84.35    8.49
   0  -1 -10   74.56    8.39
   0  -1 -10   79.26    6.36
   0  -1 -10   79.47    6.46
   0   1 -11   36.78    6.79
   0  -1 -11   40.12    8.49
   0  -1 -11   30.89    6.05
   0   1 -11   33.62    8.06
   0  -1 -12   41.58    8.22
   0   1 -12   26.88    6.82
   0  -1 -12   25.57    5.63
   0   1 -12   30.71    7.58
   0  -1 -13   77.27    6.69
   0   1 -13   92.02    7.38
   0  -1 -13   97.36    8.82
   0   1 -13   85.96    8.02
   0  -1 -14   65.91    5.79
   0   1 -14   68.51    6.56
   0  -1 -14   68.06    7.44
   0   1 -14   65.47    7.00
   0  -1 -15    6.41    5.23
   0  -1 -15    6.50    3.77
   0   1 -15   10.28    5.03
   0   1 -15    8.39    4.74
   0  -1 -16  284.09   13.07
   0   1 -16  271.52   12.85
   0  -1 -17    6.60    2.79
   0   1 -17    5.58    2.75
   0  -2   0  774.36   33.02
   0   2  -1  866.01   36.88
   0   2   1  866.29   36.93
   0  -2   2  848.08   35.66
   0   2   2  815.14   35.69
   0  -2   3  715.40   31.14
   0  -2  -3  730.22   31.22
   0   2  -3  658.68   31.24
   0  -2  -4 1060.49   45.78
   0  -2   4 1055.42   45.77
   0  -2   4 1061.62   45.67
   0   2  -4 1079.56   45.90
   0  -2  -5 1170.17   52.69
   0  -2   5 1214.47   52.81
   0   2  -5 1319.84   53.16
   0  -2  -6 2672.28  113.88
   0   2   6 2617.92  113.19
   0  -2   6 2840.85  114.04
   0   2   6 2624.57  113.51
   0   2  -6 2631.83  113.39
   0   2  -6 2962.11  114.55
   0   2  -6 2629.57  113.14
   0   2   7 1254.24   54.17
   0  -2   7 1306.47   55.18
   0   2  -7 1334.65   55.79
   0  -2  -7 1261.81   53.98
   0  -2  -7 1263.19   53.94
   0  -2  -7 1215.01   54.94
   0   2  -7 1284.87   54.48
   0  -2  -7 1246.83   55.18
   0  -2   8  375.57   18.26
   0   2  -8  359.76   18.88
   0  -2  -8  381.34   16.78
   0  -2  -8  370.29   17.58
   0  -2  -8  388.50   16.80
   0  -2  -8  340.27   18.22
   0   2  -8  378.22   17.64
   0  -2  -8  363.79   18.12
   0   2  -9   52.64    6.88
   0  -2  -9   52.04    5.01
   0  -2  -9   55.21    5.05
   0  -2  -9   59.55    7.53
   0  -2 -10   -6.74    4.40
   0  -2 -10   -4.13    7.58
   0   2 -10    1.58    6.71
   0  -2 -10   -1.99    4.48
   0   2 -10    1.02    5.73
   0  -2 -11  108.17    9.79
   0  -2 -11   99.12    7.13
   0   2 -11  105.31    8.47
   0   2 -11  101.71    9.39
   0  -2 -11   96.93    7.12
   0   2 -12    7.99    7.06
   0  -2 -12    8.51    4.68
   0   2 -12    6.89    6.59
   0  -2 -12   10.94    8.16
   0  -2 -13  185.14   10.03
   0  -2 -13  198.53   11.95
   0   2 -13  188.74   11.17
   0   2 -13  196.68   11.36
   0  -2 -14    5.08    6.62
   0   2 -14    1.46    5.84
   0  -2 -14    6.57    3.77
   0   2 -14    5.98    5.59
   0  -2 -15  277.82   13.26
   0   2 -15  250.55   12.89
   0  -2 -16   -0.59    3.73
   0   2 -16    4.88    3.49
   0  -2 -17   94.85    5.26
   0  -3   0    0.72    3.09
   0  -3   0    1.63    3.24
   0  -3  -1   54.48    4.33
   0   3  -1   37.88    4.34
   0   3   2  712.77   31.17
   0  -3   2  746.48   31.09
   0   3  -2  698.82   31.07
   0  -3  -3  614.69   25.65
   0  -3   3  589.81   25.49
   0   3   3  559.56   25.69
   0   3  -3  552.01   25.49
   0  -3   3  606.64   25.71
   0  -3   4  253.18   12.31
   0   3   4  258.79   12.97
   0  -3   4  259.69   12.35
   0  -3  -4  270.29   12.41
   0  -3   5  648.02   28.47
   0   3   5  599.04   28.06
   0  -3  -5  612.57   28.38
   0  -3   5  671.31   28.30
   0   3  -6 1714.89   74.54
   0   3   6 1686.72   74.99
   0  -3  -6 1761.78   75.33
   0  -3   6 1815.51   75.46
   0   3   6 1748.24   74.62
   0   3  -6 1757.56   74.87
   0   3  -6 1968.79   76.55
   0   3   7  243.99   11.65
   0   3   7  238.73   12.70
   0   3  -7  253.63   12.25
   0   3  -7  245.75   11.49
   0  -3  -7  241.78   12.44
   0  -3   7  252.72   12.67
   0  -3  -7  238.86   11.15
   0   3  -7  223.96   13.95
   0  -3  -8  299.28   13.57
   0   3  -8  293.96   14.83
   0   3   8  299.11   14.14
   0   3  -8  311.25   14.09
   0   3  -9   36.49    5.76
   0  -3  -9   41.51    4.17
   0   3  -9   42.07    7.35
   0  -3  -9   42.08    4.54
   0  -3  -9   36.26    7.79
   0   3 -10  242.18   13.16
   0  -3 -10  215.74   11.09
   0  -3 -10  213.63   13.60
   0  -3 -10  228.95   11.16
   0  -3 -11   54.26    9.21
   0  -3 -11   54.46    5.40
   0   3 -11   68.25    8.45
   0  -3 -11   60.05    5.55
   0   3 -12  167.96   10.68
   0  -3 -12  163.08   11.70
   0  -3 -13   14.84    7.72
   0   3 -13   11.76    6.11
   0   3 -14  335.12   16.05
   0  -3 -14  317.60   16.31
   0  -3 -15    6.53    5.07
   0   3 -15    6.70    4.81
   0  -3 -16  193.88    9.48
   0   3 -16  186.71    9.43
   0  -4   0  145.63    7.64
   0  -4   0  146.36    7.70
   0  -4  -1  249.55   11.72
   0  -4  -1  259.39   11.77
   0  -4   1  234.80   11.63
   0   4  -2  256.70   11.70
   0  -4   2  238.14   11.51
   0  -4   3   56.57    4.69
   0   4  -3   51.88    4.52
   0  -4   3   49.35    4.43
   0   4   3   54.41    4.37
   0  -4   4   73.83    5.04
   0  -4   4   80.42    5.52
   0   4   4   71.27    5.57
   0  -4  -4   71.93    5.04
   0   4  -4   71.93    4.76
   0   4   4   66.53    5.11
   0   4  -4   82.60    5.58
   0   4   5  282.75   13.50
   0   4  -5  299.24   14.33
   0  -4  -5  288.77   13.66
   0   4  -5  270.48   12.70
   0   4   5  274.28   12.89
   0  -4   5  288.41   13.66
   0  -4   5  284.85   13.43
   0   4  -5  278.52   13.18
   0   4   5  300.37   14.87
   0   4   6   21.39    3.76
   0   4   6   26.60    6.53
   0  -4   6   25.41    4.31
   0   4  -6   21.92    4.68
   0  -4  -6   19.73    4.16
   0  -4   6   26.98    4.33
   0   4  -6   23.15    4.35
   0   4  -6   16.59    3.42
   0   4   6   27.60    5.82
   0   4   7  177.26   10.99
   0  -4  -7  154.25    9.66
   0   4   7  177.03   12.98
   0   4  -7  191.97   10.08
   0   4  -7  172.96    8.85
   0  -4   7  167.83    9.92
   0   4   7  177.07    9.15
   0   4   8  270.69   13.05
   0   4  -8  260.15   14.10
   0   4   8  256.02   14.67
   0   4  -8  262.64   12.88
   0   4  -9  809.88   34.76
   0   4  -9  754.17   35.70
   0  -4 -10   99.38   10.56
   0   4 -10   87.25    9.63
   0   4 -10   94.16    7.92
   0   4 -11  888.14   39.29
   0  -4 -11  892.80   40.06
   0  -4 -12  359.08   18.74
   0   4 -12  369.76   17.83
   0  -4 -13  461.39   21.30
   0   4 -13  419.01   20.51
   0  -4 -14    3.21    6.44
   0  -4 -15  157.15    9.08
   0  -4 -16    4.43    3.36
   0  -5   0   -3.28    3.64
   0  -5   0    1.32    3.14
   0   5   0    0.62    2.62
   0  -5  -1  603.99   26.11
   0  -5   1  597.00   26.11
   0   5   1  574.87   25.53
   0  -5   2   40.56    4.14
   0  -5  -2   42.61    4.69
   0   5   2   34.41    3.78
   0   5  -3   66.61    4.81
   0  -5   3   68.49    5.17
   0   5   3   63.20    5.02
   0  -5   3   63.57    5.02
   0   5  -3   68.95    5.58
   0  -5  -3   67.47    5.56
   0  -5   4  419.38   19.02
   0   5   4  406.65   18.22
   0   5  -4  407.53   18.08
   0   5  -4  405.02   18.52
   0   5  -4  437.79   19.37
   0   5   4  417.12   19.34
   0  -5  -4  404.67   18.92
   0   5   4  400.20   18.70
   0  -5   4  445.96   19.30
   0   5   5 1298.01   57.56
   0   5   5 1294.26   56.05
   0   5  -5 1385.62   57.34
   0  -5  -5 1282.40   56.83
   0  -5   5 1305.90   56.94
   0   5  -5 1310.61   56.33
   0   5   5 1283.26   56.43
   0   5  -5 1332.74   55.96
   0  -5   5 1322.86   56.80
   0   5  -6  206.25   12.64
   0  -5   6  212.32   11.25
   0   5   6  182.36   12.32
   0   5  -6  207.12   10.16
   0   5  -6  221.60   11.03
   0   5   6  222.60   10.35
   0  -5  -6  192.27   11.03
   0   5   6  217.29   11.89
   0  -5   6  201.77   11.02
   0   5   7  418.81   19.12
   0   5  -7  423.76   18.92
   0   5   7  411.08   20.35
   0   5  -7  408.57   19.94
   0   5   8  398.38   20.33
   0   5  -8  363.56   19.33
   0   5  -8  398.00   18.17
   0   5   8  396.52   18.35
   0   5  -9  565.94   25.61
   0   5 -10  428.01   20.21
   0   5 -11  482.11   22.42
   0   5 -12  180.64   10.57
   0  -5 -12  181.88   12.17
   0  -5 -13   50.49    7.95
   0   5 -13   48.73    6.44
   0  -5 -14    9.65    5.97
   0   5 -14   -1.96    5.08
   0  -5 -15   -3.00    4.39
   0   5 -15    1.01    3.68
   0  -5 -16    0.26    2.62
   0   5 -16    2.80    2.34
   0   6   0  283.94   13.05
   0  -6   0  278.60   13.78
   0  -6  -1  269.70   12.86
   0   6   1  256.59   12.08
   0  -6   1  241.77   12.69
   0   6  -1  259.76   12.04
   0  -6   1  249.45   12.58
   0   6   2 1733.56   72.93
   0   6   2 1721.89   72.62
   0  -6  -2 1739.47   73.64
   0  -6   2 1682.07   73.49
   0  -6   2 1634.91   73.58
   0  -6  -3   46.31    5.56
   0  -6   3   45.30    4.80
   0   6   3   43.24    5.17
   0   6   3   43.85    3.84
   0  -6   3   44.54    4.60
   0  -6  -4 1476.71   62.65
   0   6   4 1445.14   61.72
   0  -6   4 1422.40   62.22
   0   6   4 1464.65   61.34
   0  -6  -4 1334.53   62.04
   0  -6   4 1465.20   62.41
   0  -6   5   89.97    6.95
   0   6   5  101.53    6.30
   0   6   5  111.86    8.29
   0   6  -5  107.57    7.23
   0  -6   5  103.73    7.16
   0  -6  -5   88.57    6.76
   0   6  -5  111.30    5.97
   0   6  -6  970.34   42.63
   0   6   6  965.13   42.08
   0   6  -6  973.12   41.97
   0   6   6  985.31   42.98
   0   6   7   61.84    6.20
   0   6   7   71.30   10.45
   0   6  -7   71.46    8.03
   0   6  -7   66.05    5.93
   0   6  -8  306.28   16.76
   0   6   8  300.69   18.05
   0   6   8  309.75   15.09
   0   6  -8  311.09   15.04
   0   6  -9  177.04   10.24
   0   6  -9  156.67   12.42
   0   6 -10  138.36    8.66
   0   6 -10  118.83   11.04
   0   6 -11  148.18    9.26
   0   6 -11  143.66   11.54
   0   6 -12   51.96    6.27
   0   6 -13   22.79    5.21
   0   6 -14   10.34    4.10
   0  -6 -14    6.27    5.24
   0   6 -15    7.55    2.86
   0  -6 -15   11.78    3.69
   0   7   0   -1.17    4.51
   0   7  -1  469.51   20.53
   0   7   1  469.91   20.59
   0  -7   1  403.62   21.01
   0  -7  -1  457.26   21.45
   0   7   2   55.82    5.61
   0  -7   2   37.78    5.11
   0   7  -2   49.08    5.40
   0   7   3  851.36   36.06
   0  -7   3  794.25   36.50
   0   7   3  868.45   35.49
   0   7   4  131.22    7.46
   0   7   4  133.22    9.39
   0   7   5 1125.35   48.31
   0   7   5 1085.21   47.48
   0   7   6  184.85   12.85
   0   7  -6  180.81    9.40
   0   7   6  187.64    9.95
   0   7   7  578.49   25.72
   0   7  -7  554.38   25.38
   0   7   7  594.07   27.62
   0   7   8   22.19    5.91
   0   7  -8   15.74    5.31
   0   7   8   16.31   11.53
   0   7  -8   16.20    8.99
   0   7  -9  204.36   11.07
   0   7  -9  204.60   13.58
   0   7   9  216.79   14.61
   0  -7 -10    6.39    8.44
   0   7 -10    6.24    4.90
   0   7 -10    2.04    8.67
   0   7 -11  190.16   10.43
   0   7 -12   98.27    6.85
   0   7 -13   76.45    5.65
   0   7 -14    7.69    3.02
   0   7 -15    8.45    2.45
   0  -7 -15    8.24    2.55
   0   8   0  344.39   16.70
   0   8   1    3.80    5.97
   0   8  -1    1.28    5.54
   0   8   2 1138.43   49.01
   0   8  -2 1109.21   48.84
   0   8   3   23.58    6.94
   0   8  -3   21.94    6.07
   0   8  -4  464.17   21.83
   0   8   4  495.41   22.44
   0   8   4  452.68   21.01
   0   8   5  152.14    8.74
   0   8   5  157.44   12.10
   0   8   6  335.66   16.47
   0   8   6  375.92   19.15
   0   8   7    7.91    5.23
   0   8   7   13.05   10.57
   0   8  -8  112.37    7.05
   0   8   8  133.85   12.48
   0   8  -9  204.65   10.55
   0  -8 -10   58.35    8.82
   0   8 -10   45.16    5.04
   0  -8 -11  229.40   12.38
   0   8 -11  190.74   10.15
   0   8 -12   76.10    5.21
   0  -8 -12   84.50    7.56
   0   8 -13  137.87    7.03
   0  -8 -13  154.27    8.33
   0   8 -14    3.79    2.88
   0   9   0    8.08    7.03
   0   9  -1  359.84   18.18
   0   9   1  374.65   18.42
   0   9  -2   17.01    6.86
   0   9   2   12.64    7.66
   0   9   3   12.00    8.73
   0   9  -3    7.50    7.07
   0   9  -4   58.29    8.13
   0   9   4   68.05    9.91
   0   9  -5  111.41    9.59
   0   9   5  107.58   11.14
   0   9  -6   13.83    7.54
   0   9   6   12.52    4.30
   0   9   6    7.42    9.74
   0   9   7   20.93   10.34
   0   9  -7   36.73    8.48
   0   9   7   21.51    4.73
   0   9  -8   60.34    9.13
   0   9   8   74.30   10.77
   0   9  -9   13.39    8.06
   0  -9 -10  309.56   16.11
   0   9 -10  315.24   16.53
   0  -9 -11    4.17    5.63
   0   9 -11    9.27    6.05
   0   9 -12  308.17   14.20
   0  -9 -12  280.77   14.03
   0  -9 -13    2.52    3.34
   0   9 -13    3.96    3.03
   0  10   0   43.74    7.62
   0  10  -1    4.58    7.07
   0  10   1    9.27    7.47
   0  10  -2  108.46    9.25
   0  10   2  115.84   10.01
   0  10   3  207.74   13.13
   0  10  -3  206.77   12.36
   0  10  -4  188.23   11.84
   0  10   4  193.98   12.90
   0  10  -5    6.66    7.20
   0  10   5   13.41    9.03
   0  10   6   65.72   10.17
   0  10  -6   79.57    8.98
   0  10   7   21.01    9.62
   0  10  -7   35.23    8.29
   0  10  -8   27.32    7.82
   0  10   8   38.67    9.14
   0 -10  -9   60.51    7.55
   0  10  -9   59.10    8.04
   0 -10 -10   10.35    5.63
   0  10 -10   12.62    5.74
   0  10 -11  303.80   13.64
   0 -10 -11  258.28   13.38
   0  10 -12   10.52    3.06
   0 -10 -12    4.45    3.10
   0  11   0    3.29    7.44
   0  11   1   21.57    7.57
   0  11  -1   25.55    7.35
   0  11  -2   21.68    7.31
   0  11   2   11.87    7.79
   0  11   3   69.47    9.05
   0  11  -3   55.34    7.91
   0  11   4  118.74   10.63
   0  11  -4  119.79    9.78
   0  11  -5  719.14   32.75
   0  11   5  717.49   33.03
   0  11  -6  125.53   10.00
   0  11   6  137.24   10.98
   0  11  -7  219.32   12.86
   0  11   7  218.35   13.21
   0 -11  -8   37.14    5.99
   0  11  -8   33.32    7.23
   0  11  -9   59.93    6.39
   0 -11  -9   38.40    5.48
   0  11 -10   22.10    4.56
   0 -11 -10   23.37    3.95
   0  12   0   80.87    8.29
   0  12  -1    6.15    7.03
   0  12   1    1.42    7.20
   0  12   2  184.39   11.58
   0  12  -2  163.82   10.99
   0  12   3   96.49    8.91
   0  12  -3  101.22    8.90
   0  12  -4  118.77    9.20
   0  12   4   98.98    9.31
   0  12   5   -1.48    6.87
   0  12  -5   -8.63    6.75
   0  12  -6  168.45   10.98
   0  12   6  175.12   10.74
   0  12  -7   -2.22    5.88
   0 -12  -7   -0.38    4.36
   0  12  -8   41.81    5.71
   0 -12  -8   38.10    4.36
   0  12  -9    1.86    3.37
   0  13   0    0.35    6.06
   0  13  -1  382.74   18.20
   0  13   1  366.71   18.03
   0  13  -2    7.30    5.93
   0  13   2    1.15    5.77
   0  13  -3   86.42    7.55
   0  13   3   72.96    7.15
   0  13  -4   13.64    6.16
   0  13   4   13.75    5.70
   0  13   5   62.30    6.07
   0  13  -5   59.47    6.79
   0  13  -6    6.85    4.87
   0  14   0  108.94    7.39
   0  14   1    4.05    4.36
   0  14  -1    4.85    4.86
   1   0 -17    1.67    2.26
   1   0 -17    2.44    3.43
   1   0 -16  172.27    8.75
   1   0 -16  164.37    8.80
   1   0 -15    2.47    4.70
   1   0 -15   -3.35    5.14
   1   0 -14  651.14   29.17
   1   0 -14  654.92   29.49
   1   0 -13   -0.44    5.74
   1   0 -13   -3.47    6.65
   1   0 -12  428.05   21.18
   1   0 -12  435.53   20.39
   1   0 -11    1.49    7.29
   1   0 -11   -3.42    5.68
   1   0 -11    5.05    5.74
   1   0 -10 1533.17   65.51
   1   0 -10 1533.46   65.91
   1   0 -10 1514.59   65.52
   1   0  -9    4.81    5.43
   1   0  -9   -1.44    4.76
   1   0  -9   -1.08    3.81
   1   0  -9    1.85    4.13
   1   0  -8 6338.73  272.44
   1   0  -8 6109.07  272.55
   1   0  -8 6492.07  271.46
   1   0  -8 6461.15  271.68
   1   0  -8 6510.29  271.45
   1   0  -7    1.43    3.01
   1   0  -7    0.13    2.84
   1   0  -7    8.62    4.09
   1   0  -7    0.57    3.88
   1   0  -7   -3.42    3.75
   1   0  -6 2938.07  118.03
   1   0  -6 2833.14  118.10
  -1   0   6 2552.42  118.04
  -1   0   5    4.33    3.64
   1   0  -5    3.31    3.96
   1   0  -5    2.28    3.56
  -1   0   4 9999.00  420.37
   1   0  -4 9932.11  420.37
   1   0  -3    0.15    3.20
   1   0  -2 1619.86   68.57
  -1   0   1    0.03    0.61
  -1   0   0 8187.52  346.81
   1   0   0 8272.97  346.81
   1   0   1    1.61    1.51
   1   0   2 3589.63  151.64
  -1   0  -3    3.91    3.73
   1   0   3    4.93    3.88
  -1   0  -3    4.92    4.55
  -1   0  -4  138.66    7.87
   1   0   4  131.59    7.40
  -1   0  -4  138.91    7.58
  -1   0  -5    2.53    3.19
  -1   0  -5    0.18    3.93
   1   0   5    1.17    3.69
  -1   0  -6 1078.96   46.78
   1   0   6 1077.69   46.66
  -1   0  -6 1063.86   45.71
  -1   0  -7    0.06    4.40
  -1   0  -7    2.05    3.27
  -1   0  -7   -1.94    4.68
   1   0   7    1.09    4.08
  -1   0  -8  197.70   12.02
  -1   0  -8  213.63   10.49
  -1   0  -8  225.43   11.42
  -1   0  -9    3.63    6.56
  -1   0  -9   -3.16    4.63
  -1   0 -10    4.37    7.87
  -1   0 -10    5.30    5.32
  -1   0 -11    1.96    5.78
  -1   0 -11   -7.30    8.06
  -1   0 -12   18.39    7.85
  -1   0 -12   17.31    5.48
  -1   0 -13   -1.88    5.07
  -1   0 -13   -6.40    6.98
  -1   0 -14  234.11   12.08
  -1   0 -14  213.62   11.23
  -1   0 -15    0.05    3.41
  -1   0 -15    1.16    4.58
  -1   0 -16   52.76    4.56
   1   1 -17   74.96    5.03
   1   1 -17   62.37    4.28
   1   1 -16  139.78    8.04
   1  -1 -16  116.46    7.26
   1  -1 -16  108.26    6.53
   1   1 -16  137.56    7.26
   1   1 -15  147.15    8.77
   1  -1 -15  156.65    9.27
   1   1 -15  164.81    9.06
   1  -1 -15  139.75    8.36
   1  -1 -14   70.95    7.52
   1  -1 -14   68.48    6.06
   1   1 -14   69.48    6.87
   1   1 -14   67.27    7.11
   1   1 -13  349.12   16.21
   1  -1 -13  307.81   15.68
   1   1 -13  312.60   16.31
   1  -1 -13  339.13   16.78
   1  -1 -12   20.80    7.89
   1   1 -12   24.52    6.77
   1  -1 -12   19.95    5.78
   1   1 -12   18.70    7.48
   1  -1 -12   13.11    5.88
   1  -1 -11  170.56   11.37
   1   1 -11  174.27   11.26
   1  -1 -11  166.26    9.86
   1   1 -11  179.18   10.50
   1  -1 -11  177.98   10.07
   1  -1 -10   14.34    4.82
   1  -1 -10   14.03    4.84
   1   1 -10    9.75    6.57
   1   1 -10   15.23    5.60
   1  -1 -10    6.26    6.84
   1   1 -10   13.40    5.29
   1   1  -9  664.35   27.48
   1   1  -9  627.62   27.45
   1  -1  -9  612.57   27.82
   1  -1  -9  611.96   27.31
   1  -1  -9  639.64   27.28
   1   1  -9  653.77   27.97
   1   1  -9  577.38   28.76
   1   1  -8  270.36   13.70
  -1   1   8  258.42   12.34
  -1  -1   8  269.77   13.47
   1   1  -8  268.03   13.83
   1  -1  -8  264.63   12.18
   1  -1  -8  244.32   13.28
   1   1  -8  275.81   12.33
   1   1  -8  280.51   13.08
   1   1  -8  265.97   12.38
   1  -1  -8  267.65   12.92
   1  -1  -8  258.38   12.29
   1  -1  -8  217.20   13.14
   1   1  -7   93.46    5.59
   1   1  -7  106.19    6.89
   1   1  -7  107.42    7.24
   1  -1  -7  100.00    6.92
   1  -1  -7   90.35    5.45
   1  -1  -7  100.40    5.44
  -1   1   7   91.83    5.66
   1   1  -7   98.31    6.41
   1  -1  -7  100.35    6.36
  -1  -1   7  102.00    6.74
   1   1  -7  102.73    5.74
  -1  -1   6   13.14    3.65
   1   1  -6   19.16    4.08
   1   1  -6   14.62    4.43
   1   1  -5 1876.17   80.38
  -1  -1   5 1852.06   80.33
   1   1  -5 1932.72   80.52
   1   1  -4 2056.09   86.86
   1   1  -4 2046.49   86.71
  -1  -1   4 2025.79   86.75
   1   1  -3  136.81    6.73
  -1  -1   3  141.49    6.88
   1   1  -3  131.80    7.08
  -1  -1   2 2732.53  115.63
   1   1  -2 2801.80  115.82
  -1  -1   2 2709.53  115.80
  -1  -1   1 5934.71  256.87
   1  -1  -1 6202.81  257.03
  -1  -1   1 6174.78  256.83
   1  -1   0  127.00    5.45
  -1   1   0  114.36    5.41
  -1  -1  -1 3226.01  134.39
   1   1   1 3142.33  134.41
   1   1   2  850.87   32.76
  -1  -1  -2  792.42   32.69
  -1   1  -2  710.57   33.00
   1  -1   2  662.23   32.90
   1   1   3 4362.26  185.64
   1  -1   3 4486.14  185.82
   1  -1   3 4288.13  185.75
  -1  -1  -3 4390.24  185.61
  -1   1  -3 4458.10  185.86
   1   1   4  942.73   40.04
  -1   1  -4  943.18   40.27
   1  -1   4  951.68   40.11
  -1  -1  -4  986.72   40.08
  -1   1  -5  436.88   20.97
   1  -1   5  448.93   20.78
  -1  -1  -5  479.24   20.78
   1   1   5  475.68   20.82
  -1  -1  -5  457.10   21.03
  -1  -1  -6 2521.62  107.89
  -1  -1  -6 2509.22  108.06
   1  -1   6 2533.81  107.98
  -1   1  -6 2468.57  107.29
  -1   1  -6 2539.48  107.09
   1   1   6 2599.63  107.99
  -1   1  -6 2560.87  108.16
  -1  -1  -7  600.91   27.72
  -1   1  -7  614.89   26.40
  -1  -1  -7  612.75   26.21
  -1   1  -7  611.66   27.81
   1  -1   7  632.78   27.60
  -1  -1  -7  600.11   27.37
  -1   1  -7  582.01   26.73
  -1  -1  -7  589.22   26.23
  -1   1  -8  123.27    7.31
  -1   1  -8  122.58    8.20
  -1  -1  -8  129.90    6.88
  -1   1  -8  118.50    8.79
  -1  -1  -8  130.40    7.01
  -1  -1  -9    3.94    4.50
  -1  -1  -9    5.52    6.94
  -1   1  -9    2.52    6.35
  -1   1  -9    3.61    5.03
  -1   1 -10   59.44    7.94
  -1   1 -10   67.11    6.96
  -1  -1 -10   57.71    8.52
  -1  -1 -10   61.22    6.05
  -1   1 -11   60.39    8.59
  -1  -1 -11   58.12    6.45
  -1  -1 -11   55.22    8.93
  -1   1 -11   57.05    7.18
  -1   1 -12   92.49    8.49
  -1  -1 -12   81.53    8.85
  -1   1 -12   94.04    7.62
  -1  -1 -12   89.55    6.93
  -1  -1 -13   14.87    4.97
  -1  -1 -13   21.27    7.05
  -1   1 -13   17.68    5.95
  -1   1 -13   23.75    6.81
  -1   1 -14   77.73    7.11
  -1  -1 -14   76.66    5.74
  -1  -1 -14   76.47    7.35
  -1   1 -14   80.63    6.42
  -1  -1 -15    7.85    3.01
  -1   1 -15    8.12    4.55
  -1  -1 -15   -1.23    4.70
  -1   1 -15   10.01    4.88
  -1   1 -15    9.20    3.76
  -1  -1 -16   17.66    3.51
  -1   1 -16   15.15    2.75
  -1   1 -16   20.03    3.72
   1   2 -17  169.44    7.84
   1   2 -17  166.39    7.55
   1   2 -16  112.31    7.34
   1  -2 -16   96.03    6.62
   1   2 -16  109.57    6.72
   1   2 -15  174.85    9.53
   1  -2 -15  169.43    9.59
   1   2 -15  179.78   10.28
   1  -2 -14   47.48    5.12
   1   2 -14   47.35    6.20
   1  -2 -14   53.87    7.36
   1   2 -14   59.64    6.69
   1   2 -13   66.05    7.56
   1  -2 -13   64.38    5.82
   1   2 -13   53.67    7.26
   1  -2 -13   65.00    8.23
   1  -2 -12  162.53    9.43
   1  -2 -12  156.17    9.41
   1   2 -12  166.94   10.63
   1   2 -12  156.25   10.81
   1  -2 -12  168.23   11.47
   1   2 -11   56.27    8.26
   1  -2 -11   44.88    8.78
   1  -2 -11   63.27    6.16
   1  -2 -11   51.63    5.99
   1   2 -10  332.40   16.88
   1  -2 -10  330.15   15.64
   1  -2 -10  336.97   17.09
   1  -2 -10  336.10   15.73
   1   2  -9  352.26   15.76
   1  -2  -9  327.77   15.25
   1  -2  -9  320.72   16.22
  -1   2   9  314.28   15.64
   1  -2  -9  334.21   15.39
   1   2  -9  339.30   16.52
   1  -2  -8   38.03    3.99
   1  -2  -8   36.77    3.69
  -1  -2   8   37.89    5.12
   1   2  -8   27.83    6.63
   1  -2  -8   37.57    5.13
   1   2  -8   41.87    5.90
   1  -2  -8   40.76    5.38
   1  -2  -7   -0.04    2.64
   1  -2  -7    0.76    3.51
   1   2  -7    0.47    3.02
  -1  -2   7   -2.89    3.92
   1  -2  -7    3.53    3.02
   1   2  -7   -1.83    5.38
   1   2  -7   -2.62    4.57
   1   2  -6  387.91   18.72
   1   2  -6  382.50   17.13
  -1   2   6  388.21   17.89
   1  -2  -6  398.16   18.04
   1   2  -6  382.58   17.21
  -1  -2   6  414.44   18.05
  -1  -2   5   21.20    3.74
   1  -2  -5   22.78    3.84
   1   2  -5   23.82    4.56
   1  -2  -4  224.68   10.90
  -1  -2   4  214.76   10.50
   1   2  -4  224.90   10.49
  -1  -2   4  222.31   10.21
  -1  -2   3  328.84   14.64
  -1  -2   3  338.41   14.86
  -1  -2   2 5448.37  230.86
   1   2  -2 5445.44  230.86
  -1  -2   2 5559.10  230.98
  -1  -2   1  269.25   11.73
   1  -2   0 3004.09  128.53
  -1  -2   0 3066.23  128.38
  -1  -2  -1   46.70    3.22
   1  -2   1   54.20    4.37
   1  -2   2  413.37   17.37
  -1  -2  -2  369.98   16.88
  -1   2  -2  350.78   17.30
   1   2   2  398.97   16.81
   1  -2   3 2608.05  111.33
  -1  -2  -3 2616.07  111.08
  -1   2  -3 2647.78  111.39
   1  -2   4 1707.82   70.63
  -1  -2  -4 1606.46   70.33
  -1   2  -4 1650.29   70.72
  -1   2  -5 3327.87  143.72
  -1  -2  -5 3359.66  143.32
   1  -2   5 3445.09  143.57
  -1   2  -6  886.06   37.60
  -1  -2  -6  846.73   36.57
  -1   2  -6  819.60   36.49
  -1  -2  -6  827.87   37.37
  -1  -2  -6  854.45   37.09
  -1   2  -7 1145.38   50.63
  -1   2  -7 1141.06   49.44
  -1  -2  -7 1139.84   48.93
  -1  -2  -7 1125.04   50.37
  -1  -2  -7 1196.99   50.27
  -1   2  -8  187.83    9.57
  -1   2  -8  175.00   10.04
  -1  -2  -8  178.95    8.89
  -1  -2  -8  178.28    8.88
  -1   2  -9  507.89   23.59
  -1   2  -9  533.94   23.31
  -1  -2  -9  498.31   22.67
  -1   2 -10   10.95    7.07
  -1   2 -10   11.57    6.34
  -1  -2 -10   13.34    4.43
  -1   2 -11  153.83   10.78
  -1  -2 -11  145.87    8.72
  -1  -2 -11  146.57   11.56
  -1   2 -11  158.72   10.11
  -1  -2 -12   -4.77    7.90
  -1   2 -12   10.48    6.73
  -1  -2 -12   -0.99    4.19
  -1   2 -12    1.67    6.30
  -1  -2 -13   68.54    5.64
  -1   2 -13   80.30    7.31
  -1   2 -13   83.85    7.44
  -1  -2 -13   84.70    8.65
  -1   2 -14   -6.36    5.53
  -1   2 -14    4.30    5.17
  -1  -2 -14    4.97    6.06
  -1   2 -14    3.46    5.98
  -1   2 -15  363.86   16.45
  -1  -2 -15  342.89   16.29
  -1   2 -15  338.89   16.07
  -1  -2 -16   73.13    4.87
  -1   2 -16   66.82    4.48
  -1   2 -16   80.54    4.99
   1   3 -17    2.49    2.86
   1   3 -16   85.27    5.94
   1   3 -16   95.89    6.26
   1   3 -15   28.98    6.33
   1  -3 -15   25.62    5.90
   1   3 -15   29.84    5.57
   1   3 -14  122.31    9.52
   1  -3 -14  116.07    8.94
   1  -3 -13    6.31    7.46
   1  -3 -13   11.27    4.05
   1   3 -13   16.48    6.01
   1  -3 -12   46.29    5.19
   1  -3 -12   47.63    8.71
   1   3 -12   39.26    7.34
   1  -3 -12   42.41    5.36
   1  -3 -11  191.53   12.69
   1  -3 -11  196.60   10.36
   1  -3 -11  194.54   10.61
   1   3 -11  210.99   12.88
   1  -3 -10   10.29    4.80
   1  -3 -10    2.91    4.26
   1  -3 -10   11.72    7.73
   1   3 -10   12.49    7.52
   1   3 -10    2.90    5.76
   1   3  -9    4.93    6.92
   1  -3  -9    6.21    3.68
   1  -3  -9    5.66    4.27
   1   3  -9    4.09    5.12
   1   3  -8   12.71    5.91
  -1  -3   8   11.41    4.33
   1  -3  -8    9.88    3.15
   1   3  -8   10.18    4.17
   1  -3  -8    9.98    3.64
   1   3  -7   11.84    4.90
   1   3  -7    9.07    3.40
   1   3  -7   -1.36    5.40
  -1   3   7    9.10    6.05
  -1   3   7    9.62    3.75
   1  -3  -7    8.20    3.11
  -1  -3   7   12.02    4.03
   1  -3  -7    6.97    4.04
  -1   3   6    7.19    5.21
   1   3  -6    4.01    2.78
   1  -3  -6    3.14    3.84
  -1  -3   6    1.67    3.45
  -1   3   6    3.82    3.24
   1  -3  -5  154.34    8.28
  -1  -3   5  145.54    7.90
  -1  -3   5  155.35    7.70
   1   3  -4 1180.54   53.64
  -1  -3   4 1324.87   53.88
  -1  -3   4 1278.83   53.61
  -1  -3   3 3931.54  161.87
  -1  -3   3 3877.38  161.73
  -1   3   3 3786.05  162.21
   1   3  -3 3723.70  161.69
  -1  -3   2  498.49   20.22
  -1  -3   2  464.93   20.13
  -1  -3   1 3589.09  151.61
  -1  -3   0   16.39    2.93
  -1   3   0   18.55    3.60
   1  -3   0   17.72    3.62
  -1  -3  -1    4.77    2.98
   1  -3   1    5.53    2.96
  -1   3  -1    7.58    3.55
   1  -3   1    4.03    3.77
   1  -3   2  500.68   21.42
  -1   3  -2  451.15   21.17
   1   3   2  467.79   20.87
  -1  -3  -2  495.42   20.85
  -1  -3  -3   55.84    3.96
   1   3   3   52.55    4.13
   1  -3   3   63.34    4.91
   1  -3   4  879.47   38.50
   1  -3   4  919.07   38.67
   1   3   4  912.16   38.57
  -1  -3  -4  835.89   38.15
  -1   3  -4  895.78   38.79
   1   3   5 1191.75   53.41
   1  -3   5 1238.47   53.94
  -1   3  -5 1230.71   53.05
   1   3   5 1268.38   53.10
  -1  -3  -5 1238.31   53.62
  -1   3  -5 1193.59   53.20
  -1   3  -5 1367.52   54.50
   1  -3   5 1294.23   53.91
   1   3   5 1287.57   54.39
   1   3   6  428.95   22.51
  -1   3  -6  498.57   22.45
   1   3   6  443.54   21.25
   1  -3   6  499.92   21.66
   1   3   6  481.38   20.65
   1  -3   6  490.63   21.70
  -1   3  -6  448.07   20.82
  -1  -3  -6  461.31   21.32
  -1   3  -6  458.65   20.55
   1  -3   7 1009.13   44.45
  -1   3  -7 1017.20   43.52
   1   3   7  907.79   45.59
  -1   3  -7 1044.37   45.26
  -1   3  -7 1017.56   43.22
  -1  -3  -7  953.34   44.20
  -1  -3  -7 1020.99   43.62
  -1  -3  -8 1107.08   49.73
  -1   3  -8 1179.07   49.70
  -1   3  -9   35.04    6.95
  -1   3 -10  838.95   37.45
  -1   3 -11   -2.02    6.90
  -1   3 -12  269.25   14.02
  -1   3 -12  252.36   13.94
  -1   3 -13   -2.36    6.29
  -1  -3 -13   16.32    7.15
  -1   3 -13    2.02    6.96
  -1   3 -14  440.71   20.37
  -1  -3 -14  423.64   20.28
  -1   3 -14  430.02   19.95
  -1   3 -15  106.18    6.63
  -1   3 -15  109.59    6.97
  -1  -3 -15  104.10    6.99
  -1   3 -16  213.89    9.94
  -1   3 -16  210.97    9.77
  -1  -3 -16  209.23    9.90
   1   4 -16    6.35    4.03
   1  -4 -16   10.44    3.75
   1   4 -15   16.93    5.71
   1  -4 -15   12.84    5.36
   1   4 -14   31.81    6.21
   1   4 -14   30.85    7.46
   1  -4 -14   23.02    6.87
   1   4 -13   24.49    8.18
   1   4 -13   23.88    6.46
   1  -4 -13   38.42    7.90
   1   4 -12  467.26   21.26
   1  -4 -12  467.96   21.94
   1   4 -12  487.44   22.90
   1  -4 -12  420.47   20.26
   1   4 -11   51.48   10.70
   1  -4 -11   59.34    9.57
   1   4 -11   60.56    7.49
   1  -4 -11   51.25    5.45
   1   4 -10   44.39    6.47
   1  -4 -10   44.19    8.70
   1   4 -10   20.10    8.90
   1  -4 -10   40.06    5.21
  -1   4  10   42.37    6.98
  -1   4   9   30.93    6.02
   1  -4  -9   35.04    4.54
   1   4  -9   34.75    5.56
  -1   4   8   99.01    7.06
   1   4  -8  116.86    6.70
   1  -4  -8  106.24    6.33
   1   4  -7   10.83    3.54
  -1  -4   7   16.85    4.31
  -1   4   7    9.88    4.17
   1  -4  -7    8.25    3.43
   1   4  -7   12.54    5.71
  -1   4   7    8.55    6.86
   1  -4  -7    6.15    4.26
   1  -4  -6   38.27    4.82
  -1   4   6   35.73    4.02
   1   4  -6   31.52    3.62
   1   4  -6   32.76    4.95
  -1  -4   6   39.43    4.32
  -1   4   6   24.20    6.45
   1  -4  -6   34.43    3.67
  -1  -4   6   35.29    3.96
   1   4  -6   38.77    4.88
  -1   4   5   19.22    3.34
  -1  -4   5   19.33    3.76
   1   4  -5   18.84    3.83
  -1   4   5   20.51    5.56
  -1  -4   5   19.14    3.46
   1  -4  -5   21.91    4.39
   1   4  -5   21.91    3.83
  -1   4   5   22.63    4.65
  -1   4   4    0.19    3.35
  -1  -4   4    3.35    2.66
  -1   4   4    3.45    3.88
  -1  -4   4    1.61    3.05
   1   4  -4    0.17    3.12
  -1  -4   3  325.95   14.48
  -1   4   3  308.10   14.91
  -1  -4   3  318.14   14.31
  -1   4   2  879.43   39.15
  -1  -4   2  921.29   38.83
  -1  -4   1  253.97   11.81
  -1  -4   1  254.83   11.63
   1  -4  -1  258.51   12.22
  -1  -4   0  639.50   28.23
  -1  -4   0  661.22   28.31
  -1   4  -1 1117.47   47.72
  -1  -4  -1 1086.05   47.53
   1  -4   1 1119.77   47.76
   1  -4   1 1112.28   47.68
  -1   4  -2 1433.85   63.21
   1  -4   2 1483.81   63.33
   1  -4   2 1492.14   63.21
  -1  -4  -2 1488.72   62.88
  -1   4  -3  215.88    9.95
   1   4   3  207.53   10.10
  -1   4  -3  207.81   10.78
   1  -4   3  211.99   10.72
  -1  -4  -3  213.26   10.10
  -1   4  -4   33.54    3.28
  -1   4  -4   37.07    4.01
   1   4   4   35.86    4.49
   1   4   4   34.60    3.81
   1  -4   4   42.20    4.69
  -1  -4  -4   38.63    3.93
  -1   4  -4   35.31    5.15
   1  -4   4   40.04    4.33
  -1   4  -5 1436.61   62.08
   1  -4   5 1512.72   63.06
   1   4   5 1401.21   62.49
   1   4   5 1492.04   62.14
   1   4   5 1477.74   63.08
   1  -4   5 1536.56   63.23
  -1   4  -5 1437.05   62.32
  -1  -4  -5 1414.45   62.64
   1   4   6   54.93    4.56
   1  -4   6   46.23    5.38
  -1   4  -6   47.18    5.15
  -1   4  -6   43.97    4.43
  -1   4  -6   51.57    5.35
   1   4   6   46.54    5.29
   1   4   6   56.16    6.90
  -1  -4  -6   43.37    4.70
   1  -4   6   54.13    5.44
  -1   4  -7 2100.38   90.31
  -1   4  -7 2118.95   90.30
  -1   4  -7 2187.26   89.94
   1   4   7 2153.90   90.46
  -1  -4  -7 1946.56   90.68
  -1   4  -8   94.10    8.49
  -1   4  -8  107.47    8.52
  -1   4  -8  116.42    7.43
  -1  -4  -8  105.27    9.03
  -1   4  -9 1665.84   73.79
  -1  -4  -9 1735.91   73.85
  -1   4  -9 1671.67   73.81
  -1   4  -9 1745.30   73.32
  -1   4 -10    8.64    6.78
  -1   4 -10    8.37    7.83
  -1   4 -10    1.13    7.45
  -1   4 -11 1415.47   63.00
  -1   4 -11 1472.10   62.62
  -1   4 -12    8.03    7.09
  -1   4 -13  473.40   22.31
  -1   4 -14    7.55    5.40
  -1   4 -15  193.70    9.98
  -1  -4 -15  200.09   10.07
  -1   4 -16   12.88    2.38
  -1  -4 -16   13.92    2.66
   1   5 -16    3.85    2.91
   1  -5 -16   -0.75    3.15
   1   5 -15   81.65    6.49
   1   5 -15   77.13    5.82
   1  -5 -15   71.14    6.35
   1  -5 -14    1.58    6.50
   1   5 -14    6.26    6.27
   1   5 -14   -3.26    5.12
   1   5 -13  354.04   17.19
   1   5 -13  358.34   18.34
   1  -5 -13  355.65   17.94
   1   5 -12  227.42   12.73
   1  -5 -12  240.50   14.12
   1   5 -12  250.55   14.85
   1   5 -11  524.85   26.43
   1   5 -11  532.11   24.36
   1  -5 -11  531.94   25.45
  -1   5  10  730.19   32.11
   1   5 -10  693.79   31.85
   1   5 -10  728.93   34.11
   1   5  -9  302.50   14.75
   1   5  -9  309.77   17.48
   1  -5  -9  293.04   14.05
  -1   5   9  308.23   15.06
   1   5  -8   21.95    7.93
   1   5  -8   12.47    5.00
  -1   5   8   15.00    5.54
   1  -5  -8    9.55    3.92
   1  -5  -7  195.25   10.02
   1   5  -7  207.17   10.36
  -1   5   7  209.46   10.64
   1   5  -7  225.32   11.76
   1  -5  -6    7.69    4.19
   1  -5  -6    4.53    3.06
  -1   5   6    8.45    4.04
  -1   5   6    4.25    5.68
   1   5  -6    5.47    4.86
  -1  -5   6    5.91    3.33
  -1  -5   6    8.37    3.77
   1   5  -6    5.03    3.24
  -1  -5   5 2175.43   93.06
  -1   5   5 2203.31   94.39
   1  -5  -5 2105.72   93.55
   1  -5  -5 2150.23   93.59
   1   5  -5 2219.12   92.92
   1   5  -5 2183.90   92.55
  -1  -5   5 2190.18   93.33
  -1   5   5 2188.87   92.71
   1  -5  -5 2189.44   92.57
   1   5  -4  415.80   18.59
  -1  -5   4  429.39   18.94
  -1   5   4  407.41   19.55
  -1  -5   4  409.06   18.75
  -1   5   4  413.89   18.42
  -1  -5   3  327.49   14.44
  -1   5   3  299.95   14.81
   1  -5  -3  307.66   14.91
  -1  -5   3  319.39   14.31
  -1   5   3  298.80   13.92
  -1   5   2   30.64    3.70
  -1  -5   2   33.44    3.73
  -1  -5   2   34.67    3.43
   1  -5  -2   39.34    4.46
  -1  -5   1  756.65   33.04
  -1   5   1  719.67   32.56
   1  -5  -1  804.75   33.32
  -1  -5   1  779.26   32.94
  -1   5   0  279.30   13.26
  -1  -5   0  310.05   13.73
  -1  -5   0  303.99   13.79
   1   5   1  891.63   38.60
   1  -5   1  868.25   39.24
  -1  -5  -1  919.22   39.17
   1  -5   1  928.50   39.30
  -1   5  -2   28.50    4.64
   1  -5   2   26.03    4.13
   1   5   2   29.15    3.86
   1  -5   2   26.63    4.08
   1  -5   3  257.76   12.04
   1   5   3  230.77   11.30
  -1   5  -3  230.08   11.20
  -1   5  -3  252.20   12.24
   1  -5   3  223.94   11.59
  -1  -5  -3  222.64   11.11
  -1  -5  -4   33.49    3.96
   1   5   4   35.85    5.24
  -1   5  -4   40.56    3.58
   1   5   4   36.17    3.52
  -1   5  -4   35.54    5.80
   1  -5   4   38.30    4.80
   1  -5   4   41.79    4.95
  -1   5  -4   34.53    4.33
   1   5   5  817.50   34.16
  -1   5  -5  783.88   34.14
  -1   5  -5  790.17   34.50
  -1   5  -5  833.14   36.20
  -1  -5  -5  726.42   34.68
   1  -5   5  795.77   35.29
   1  -5   5  798.26   35.43
   1   5   5  783.72   34.75
   1   5   6   55.93    5.00
  -1   5  -6   65.97    8.94
  -1   5  -6   58.60    5.02
  -1  -5  -6   43.22    4.81
   1   5   6   58.48    7.90
   1  -5   6   49.87    5.78
  -1   5  -6   50.74    6.02
  -1   5  -7   17.26    6.49
   1   5   7   13.00    4.80
   1   5   7    3.38    8.74
  -1   5  -7   11.80    4.81
  -1   5  -8  131.33    9.98
  -1   5  -8  138.29    8.81
  -1   5  -9   54.24    8.47
  -1   5  -9   57.83    7.18
  -1  -5  -9   41.72    9.55
  -1  -5 -10  478.84   23.29
  -1   5 -10  475.32   22.07
  -1   5 -10  464.40   22.82
  -1  -5 -11   36.43    8.68
  -1   5 -11   31.54    7.94
  -1   5 -11   22.55    6.39
  -1   5 -12  316.36   16.29
  -1   5 -12  312.66   15.54
  -1   5 -13   80.04    6.66
  -1   5 -13   71.92    7.47
  -1   5 -14   11.88    5.07
  -1   5 -14   12.46    4.35
  -1   5 -15    3.24    3.04
   1   5  15    4.36    2.11
   1   6 -15   64.87    4.64
   1  -6 -15   58.18    5.38
   1  -6 -14   88.66    7.53
   1   6 -14   90.51    7.41
   1   6 -14   86.06    6.32
   1   6 -13    4.84    7.03
   1   6 -13   -3.75    5.04
   1  -6 -13   -0.19    6.98
   1  -6 -12  321.55   17.26
   1   6 -12  319.64   17.91
   1   6 -12  331.60   15.92
   1  -6 -11   11.98    8.54
   1   6 -11   23.35    5.66
   1   6 -11   21.72    9.31
   1   6 -10  528.35   27.56
   1   6 -10  544.35   25.02
  -1   6  10  564.98   25.25
   1   6  -9  169.69    9.70
  -1   6   9  146.45    9.94
   1   6  -9  156.24   13.34
   1   6  -8 1539.20   66.75
  -1   6   8 1565.36   66.96
   1   6  -8 1579.41   68.23
   1   6  -7  241.94   12.46
   1   6  -7  282.50   14.32
  -1   6   7  260.10   12.98
  -1   6   6 2878.26  124.03
   1   6  -6 2904.48  123.84
   1   6  -6 3013.83  124.50
  -1   6   5  124.68    6.93
  -1  -6   5  102.98    7.13
   1   6  -5  126.25    7.42
   1  -6  -5  110.30    7.70
   1  -6  -4 1658.52   70.23
  -1   6   4 1638.50   69.07
  -1  -6   4 1600.44   69.60
  -1  -6   4 1582.34   69.55
  -1  -6   3   -0.26    3.23
  -1   6   3    2.62    3.20
  -1  -6   3   -0.70    3.18
  -1  -6   3    7.02    3.54
   1  -6  -3    0.12    4.59
  -1  -6   2  535.51   25.66
   1  -6  -2  637.18   26.15
  -1  -6   2  553.56   25.40
  -1   6   2  573.78   24.87
   1   6  -2  568.12   25.02
  -1   6   1   13.00    3.13
   1   6  -1   10.84    3.44
  -1  -6   1   11.67    3.50
  -1  -6   0  251.00   12.16
  -1   6   0  236.49   11.18
   1  -6   0  237.36   12.39
  -1  -6   0  258.75   12.13
   1   6   0  242.70   11.51
   1   6   1  204.86   10.07
   1  -6   1  203.30   10.87
  -1   6  -1  209.06    9.68
  -1  -6  -1  208.57   10.78
   1  -6   2  214.99   11.11
  -1   6  -2  216.19    9.87
  -1  -6  -2  197.14   10.19
   1   6   2  200.46   10.39
   1  -6   2  205.07   11.10
  -1  -6  -2  219.63   11.19
  -1   6  -3  625.53   27.19
   1  -6   3  650.68   28.55
  -1  -6  -3  612.07   28.41
   1  -6   3  629.42   28.33
  -1  -6  -3  585.20   27.55
   1   6   3  655.83   27.66
  -1   6  -4   86.76    7.90
  -1   6  -4   89.43    5.40
   1  -6   4   83.42    6.89
   1   6   4   90.76    5.52
   1  -6   4   83.62    6.90
   1   6   4   97.91    7.38
  -1   6  -5    3.07    5.44
  -1   6  -5   -0.78    3.88
   1   6   5    2.28    7.13
   1   6   5    0.57    3.70
   1   6   6   53.98    5.35
  -1   6  -6   56.59    5.48
  -1   6  -6   49.58    6.70
   1   6   6   58.97    8.88
  -1   6  -7   73.85    6.37
   1   6   7   89.48   10.52
  -1   6  -7   76.39    7.99
  -1   6  -8   13.55    5.79
  -1   6  -8   -4.75    7.63
   1   6   8    4.71   10.15
  -1   6  -9  232.72   13.78
  -1  -6  -9  228.99   14.16
  -1   6  -9  229.54   12.37
  -1  -6 -10   57.03    9.07
  -1   6 -10   64.36    8.36
  -1   6 -10   65.88    6.74
  -1   6 -11  234.86   12.70
  -1   6 -11  242.14   13.79
  -1  -6 -11  254.53   14.13
  -1   6 -12   15.95    6.56
  -1  -6 -12   11.96    7.15
  -1   6 -12   10.25    5.21
  -1   6 -13   82.27    6.09
  -1  -6 -13   86.84    7.31
  -1   6 -14   79.75    5.35
  -1   6 -15    1.79    2.17
   1   7 -15   31.66    2.94
   1  -7 -15   46.02    3.95
   1  -7 -14   86.81    6.57
   1   7 -14   77.98    5.24
   1   7 -13  170.77    9.17
   1  -7 -13  171.14   10.62
   1   7 -12  100.13    7.07
   1  -7 -12  101.49    9.69
   1   7 -11  298.81   14.76
   1  -7 -11  311.59   16.63
   1   7 -10   92.40   11.52
  -1   7  10   86.05    7.35
   1   7 -10   91.70    6.82
   1   7  -9  101.47   12.17
  -1   7   9  119.28    8.16
   1   7  -9  112.26    7.64
  -1   7   8   60.16    6.87
   1   7  -8   45.06    5.82
  -1   7   7 1878.98   78.67
   1   7  -7 1803.36   78.35
  -1   7   6   11.25    5.26
  -1   7   5 1764.67   75.45
  -1   7   4  171.98    9.22
   1   7  -3  554.45   24.96
  -1   7   3  563.63   24.77
  -1   7   2  721.70   29.44
   1   7  -2  698.58   29.65
  -1   7   1  114.03    6.35
   1   7  -1  118.61    7.02
  -1  -7   1   96.33    6.95
  -1   7   0   64.33    4.61
   1   7   0   57.78    5.30
  -1   7  -1  290.79   13.46
  -1  -7  -1  294.34   14.90
   1   7   1  297.57   14.15
  -1   7  -2  303.17   14.01
   1   7   2  310.03   14.76
  -1   7  -3  641.49   28.52
   1   7   3  671.11   29.23
   1   7   4  208.38   11.90
  -1   7  -4  197.73   10.17
  -1   7  -5  410.22   18.73
   1   7   5  419.52   18.84
   1   7   5  427.85   20.49
  -1   7  -5  410.47   19.02
  -1   7  -6   63.36    6.27
   1   7   6   67.82   10.27
   1   7   6   75.80    5.94
  -1   7  -6   71.16    5.93
  -1   7  -7   18.59    5.55
   1   7   7   22.62   10.81
   1   7   8  152.14   12.67
  -1   7  -8  133.82    8.63
  -1  -7  -9  119.46   10.22
  -1   7  -9  122.40    8.01
  -1  -7 -10   -1.41    8.01
  -1   7 -10    0.66    4.95
  -1   7 -11   12.68    4.97
  -1  -7 -11    8.32    7.26
  -1   7 -12    0.47    4.38
  -1  -7 -12    0.94    6.29
  -1   7 -13   10.16    3.45
  -1  -7 -13    4.74    4.95
  -1   7 -14    1.48    2.37
  -1  -7 -14    0.14    3.29
   1  -8 -14  141.05    7.89
   1   8 -14  154.21    7.74
   1  -8 -13  165.33    8.76
   1   8 -13  131.72    7.12
   1   8 -12  159.84    8.30
   1   8 -11  176.93    9.28
   1   8 -10   30.25    4.57
  -1   8   9  358.40   16.35
   1   8  -9  322.54   15.68
  -1   8   8   12.24    5.37
  -1   8   7    3.19    5.51
  -1   8   6 1309.50   56.63
   1   8  -5  188.43   11.25
  -1   8   5  184.33   10.29
  -1   8   4 1397.21   59.75
   1   8  -4 1377.39   60.08
  -1   8   3  645.67   28.14
   1   8  -3  619.64   28.40
   1   8  -2  244.83   12.74
  -1   8   2  249.70   12.14
   1   8  -1  596.21   26.73
  -1   8   1  589.74   26.20
   1   8   0    3.65    5.81
  -1   8   0    2.19    3.90
  -1   8  -1   83.77    5.88
   1   8   1   81.60    7.38
   1   8   2  232.86   12.76
   1   8   3  246.45   13.73
   1   8   4  305.26   16.43
   1   8   5  213.87   14.02
   1   8   6    1.52    9.85
  -1   8  -6    2.31    4.02
   1   8   7   31.06   10.25
  -1   8  -7   28.46    4.53
   1   8   8    0.24    9.12
  -1   8  -8    5.08    4.30
  -1  -8  -9  342.59   16.91
  -1   8  -9  311.04   15.17
  -1   8 -10   41.15    5.00
  -1  -8 -10   47.58    7.72
  -1   8 -11  198.79   10.30
  -1  -8 -11  226.62   11.75
  -1   8 -12    4.41    3.01
  -1  -8 -12   -5.00    5.07
  -1  -8 -13   50.92    4.67
  -1   8 -13   54.44    4.53
   1   9 -13  114.62    6.64
   1   9 -12   78.72    7.01
   1   9 -11    4.08    7.51
   1   9 -10   50.87    9.34
   1   9  -9  147.74   12.66
  -1   9   8   18.05    5.05
   1   9  -8   18.66    9.39
  -1   9   7  567.71   26.44
   1   9  -7  629.71   28.18
   1   9  -6   27.87    7.79
  -1   9   6    5.87    4.84
   1   9  -5   49.01    7.76
  -1   9   5   39.06    5.74
  -1   9   4  342.95   16.25
   1   9  -4  333.94   17.28
  -1   9   3   10.51    4.93
   1   9  -3    9.74    6.73
   1   9  -2  266.24   13.38
  -1   9   2  228.59   12.05
   1   9  -1    5.93    6.61
   1   9   0  547.83   25.54
   1   9   1  179.34   11.44
   1   9   2  236.55   13.83
   1   9   3  109.83   10.25
   1   9   4  512.04   24.70
   1   9   5   98.12   10.72
   1   9   6  130.03   11.29
   1   9   7   -3.48    9.84
   1   9   8  132.31   11.38
  -1  -9  -9   -5.49    7.09
  -1  -9 -10  396.55   18.97
  -1  -9 -11   93.54    7.04
  -1  -9 -12  289.95   13.55
   1  10 -12   23.39    3.88
   1 -10 -12   28.93    3.97
   1 -10 -11   64.32    6.16
   1  10 -11   60.70    6.84
   1  10 -10   19.70    7.66
   1 -10 -10   -4.04    6.15
   1  10  -9    4.50    8.68
   1  10  -8    0.17    8.66
  -1  10   8    6.18    9.34
  -1  10   7   78.84    6.12
   1  10  -7   92.74    9.89
  -1  10   7   97.66   10.94
  -1  10   6    2.25    4.15
   1  10  -6    3.97    7.62
  -1  10   6   -2.53    9.70
   1  10  -5  206.47   12.66
   1  10  -4   13.37    7.14
   1  10  -3   25.58    7.10
   1  10  -2    3.30    6.69
   1  10  -1    8.05    6.84
   1  10   0    6.81    7.50
   1  10   1  122.08    9.92
   1  10   2    7.34    7.61
   1  10   3  632.18   29.38
   1  10   4   23.07    8.83
   1  10   5   72.54    9.71
   1  10   6   83.09   10.09
   1  10   7   45.83    9.22
  -1 -10  -8    7.70    6.51
  -1 -10  -9  166.32    9.90
  -1 -10 -10   -1.84    4.65
  -1 -10 -11   90.05    5.63
   1  11 -11   40.26    3.83
   1 -11 -11   35.37    3.70
   1 -11 -10   14.81    4.56
   1  11 -10    8.18    5.45
   1 -11  -9  100.27    7.26
   1  11  -9   69.68    8.83
  -1  11   8   -6.22    7.46
   1  11  -8   -2.05    8.24
   1  11  -7  114.72   10.65
  -1  11   7  112.07   10.32
  -1  11   6   18.77    9.06
   1  11  -6   11.71    8.13
   1  11  -5   41.95    7.82
  -1  11   5   34.76    9.34
   1  11  -4   26.30    7.42
  -1  11   4   29.44    9.07
  -1  11   3  396.28   20.05
   1  11  -3  389.88   19.28
   1  11  -2  134.82    9.67
  -1  11   2  132.30   10.76
   1  11  -1  303.33   15.75
   1  11   0  374.00   18.72
   1  11   1  175.72   11.41
   1  11   2  470.69   22.78
   1  11   3   24.70    8.36
   1  11   4  120.32   10.52
   1  11   5  109.89   10.22
   1  11   6  104.27    9.74
   1  11   7   -2.90    6.80
  -1 -11  -7   12.17    5.72
  -1 -11  -8   57.78    5.86
  -1 -11  -9   14.18    4.06
   1  12  -9    9.31    4.50
   1 -12  -9    5.59    3.35
   1 -12  -8   86.98    5.93
   1  12  -8   57.77    7.56
   1  12  -7   -8.73    7.27
  -1  12   7    8.72    6.36
   1  12  -6  212.46   13.61
  -1  12   6  227.03   12.75
   1  12  -5   37.29    7.95
  -1  12   5   36.45    7.92
  -1  12   4  192.27   11.59
   1  12  -4  166.74   11.73
   1  12  -3   20.13    7.21
  -1  12   3   15.86    7.63
  -1  12   2  457.29   21.73
   1  12  -2  443.83   21.58
  -1  12   1   40.37    7.77
   1  12  -1   45.09    7.47
   1  12   0  112.19    9.23
  -1  12   0  116.23    9.33
   1  12   1    4.26    6.93
  -1  12  -1    4.47    6.80
  -1  12  -2   -3.55    6.64
   1  12   2    5.09    6.80
   1  12   3   11.54    7.38
  -1  12  -3   12.79    6.60
   1  12   4   89.36    8.39
   1  12   5   77.51    7.97
  -1 -12  -6   51.02    5.25
   1  12   6   50.57    6.43
  -1 -12  -7   10.01    3.67
   1  13  -6   -2.57    6.30
  -1  13   6   -2.60    4.46
   1  13  -5  134.95   10.98
  -1  13   5  194.92    9.92
   1  13  -4    0.47    6.60
  -1  13   4   13.11    5.57
  -1  13   3  162.22    9.95
   1  13  -3  160.92   10.54
  -1  13   2   10.63    5.98
   1  13  -2   -0.40    6.22
  -1  13   1  145.45    9.27
   1  13  -1  137.82    9.60
   1  13   0   24.75    6.23
  -1  13   0   31.84    5.99
  -1  13  -1   18.90    5.80
   1  13   1   13.75    6.05
   1  13   2    4.95    5.70
  -1  13  -2    4.72    5.37
  -1  13  -3   54.07    5.99
   1  13   3   48.04    6.10
   1  13   4   13.66    5.08
  -1  13  -4    9.88    4.81
  -1  13  -5    9.32    4.42
  -1  13  -6    5.38    3.58
  -1  14   2   28.89    4.25
  -1  14   1   22.74    4.33
  -1  14   0   42.44    4.82
  -1  14  -1    3.40    3.98
   2   0 -17    1.42    2.96
   2   0 -17    5.02    3.94
   2   0 -16  374.11   18.20
   2   0 -16  449.11   18.60
   2   0 -15    5.49    4.88
   2   0 -15    5.16    4.95
   2   0 -14  956.30   43.46
   2   0 -14 1029.30   43.47
   2   0 -13   -0.48    6.24
   2   0 -13   -5.05    6.35
   2   0 -13    3.25    6.51
   2   0 -12 2482.10  105.70
   2   0 -12 2558.16  105.67
   2   0 -12 2372.17  105.86
   2   0 -11    2.11    7.11
   2   0 -11    5.96    5.83
   2   0 -11    0.47    5.68
   2   0 -10 3644.45  153.88
   2   0 -10 3589.58  153.64
   2   0 -10 3634.62  153.60
   2   0  -9    0.89    4.16
   2   0  -9   -1.83    5.17
   2   0  -9    4.99    4.73
   2   0  -9    2.57    4.04
   2   0  -8 1499.41   63.40
  -2   0   8 1470.40   63.12
   2   0  -8 1443.78   64.20
   2   0  -8 1498.85   64.01
   2   0  -8 1484.31   63.14
   2   0  -8 1474.30   63.17
   2   0  -7    0.51    3.69
   2   0  -7    4.30    2.97
  -2   0   7    2.55    2.91
   2   0  -7   -1.85    3.09
   2   0  -7   -1.02    3.56
   2   0  -6   33.86    4.45
   2   0  -6   31.90    3.77
   2   0  -5   -0.60    3.50
   2   0  -4 9024.99  380.79
   2   0  -3    4.32    3.85
   2   0  -3    1.40    2.04
   2   0  -1    0.19    2.21
  -2   0   1   -1.25    1.66
  -2   0   0  612.92   25.93
  -2   0   0  643.75   26.37
   2   0   0  575.33   26.45
   2   0   1    3.62    3.97
  -2   0  -1    3.81    3.77
  -2   0  -2 1350.61   58.06
   2   0   2 1394.77   58.11
   2   0   2 1332.17   57.88
   2   0   3   -2.22    3.17
   2   0   4   28.64    3.78
   2   0   5    1.54    3.65
  -2   0  -5    1.16    4.35
  -2   0  -5   -1.02    3.47
  -2   0  -6  230.48   11.11
  -2   0  -6  251.96   12.86
  -2   0  -6  244.94   11.70
   2   0   6  250.23   12.31
  -2   0  -7    0.42    4.98
  -2   0  -7   -0.78    3.31
   2   0   7    1.51    4.11
  -2   0  -7   -0.62    4.91
  -2   0  -8 1161.20   49.96
  -2   0  -9    3.31    4.98
  -2   0 -10  351.64   16.94
  -2   0 -11   -3.67    5.44
  -2   0 -12  327.61   16.87
  -2   0 -12  326.89   15.80
  -2   0 -13   -8.26    6.50
  -2   0 -13    2.97    4.63
  -2   0 -14  181.79    9.43
  -2   0 -14  193.02   10.33
  -2   0 -15   -0.35    3.68
  -2   0 -15   -4.56    4.03
  -2   0 -15    2.08    2.43
  -2   0 -16   44.79    3.26
   2   1 -17  164.76    8.00
   2   1 -17  169.22    7.51
   2  -1 -16   70.35    5.64
   2  -1 -16   75.64    5.43
   2  -1 -15  209.79   10.76
   2   1 -15  238.16   11.42
   2  -1 -15  211.67   11.14
   2   1 -14   16.89    5.34
   2  -1 -14   14.44    5.15
   2   1 -14   17.23    6.09
   2  -1 -14   18.55    6.29
   2  -1 -13  405.46   19.55
   2  -1 -13  444.21   19.83
   2  -1 -13  408.19   20.26
   2   1 -13  439.23   20.03
   2   1 -13  396.55   19.81
   2  -1 -12   38.49    8.23
   2   1 -12   36.39    7.34
   2  -1 -12   36.36    6.69
   2  -1 -12   38.64    6.48
   2   1 -12   41.98    7.31
   2   1 -12   42.18    7.75
   2   1 -11  405.35   20.22
   2   1 -11  425.39   19.73
   2  -1 -11  418.67   19.66
   2  -1 -11  416.46   19.43
   2   1 -11  430.92   19.73
   2  -1 -11  405.37   20.27
   2  -1 -10  946.89   42.11
   2   1 -10  995.49   42.62
   2  -1 -10  949.86   42.46
   2  -1 -10  943.97   41.97
   2   1 -10  973.87   42.23
   2   1 -10 1008.85   42.19
   2  -1  -9 1907.23   82.35
   2   1  -9 1952.13   82.10
   2   1  -9 2021.85   82.65
   2  -1  -9 1922.48   82.09
   2  -1  -9 1765.90   82.94
  -2   1   9 1956.79   82.11
   2  -1  -9 1912.92   82.01
   2  -1  -8 1589.71   68.88
  -2   1   8 1596.45   68.95
   2   1  -8 1715.11   69.48
   2   1  -8 1667.77   70.18
   2  -1  -8 1639.78   69.82
   2  -1  -8 1625.88   69.15
   2  -1  -8 1598.83   68.94
   2   1  -8 1614.59   70.31
   2  -1  -8 1547.05   69.94
   2   1  -7  343.82   16.60
   2  -1  -7  337.54   16.16
   2  -1  -7  337.10   15.10
   2  -1  -7  332.48   15.20
   2   1  -7  362.48   16.35
  -2   1   7  332.89   15.19
   2   1  -6  375.76   17.58
   2  -1  -6  380.55   17.57
   2   1  -6  379.57   17.50
   2   1  -5   73.00    5.26
   2   1  -5   75.58    5.60
   2  -1  -5   75.32    5.53
   2   1  -4 1336.84   57.82
   2   1  -4 1353.41   57.54
   2  -1  -4 1377.44   57.98
   2  -1  -3 2304.75   97.49
   2   1  -3 2303.27   97.56
   2  -1  -2 1738.08   74.62
   2   1  -2 1780.34   74.53
  -2  -1   1 1709.81   72.26
  -2   1   1 1674.61   72.44
  -2   1   1 1745.75   72.45
   2  -1  -1 1712.99   72.55
  -2  -1   0  208.25   10.60
   2  -1   0  219.73   10.89
   2   1   1  547.39   22.82
   2  -1   1  561.24   22.78
   2  -1   1  572.64   23.47
  -2  -1  -1  488.60   23.34
  -2  -1  -2  512.09   23.21
   2   1   2  532.58   22.80
   2  -1   3  157.03    8.23
   2   1   3  151.15    7.80
  -2  -1  -3  149.68    8.47
   2  -1   4  559.46   25.12
  -2   1  -4  578.39   25.48
   2   1   4  561.07   25.00
   2   1   5  618.28   28.23
   2  -1   5  636.36   28.40
  -2   1  -5  645.91   27.79
  -2   1  -5  639.41   28.65
  -2  -1  -5  643.66   27.82
  -2   1  -5  635.64   27.54
  -2   1  -6 1109.87   47.58
  -2  -1  -6 1095.39   47.46
  -2  -1  -6 1135.16   47.88
  -2  -1  -6 1109.68   48.89
   2   1   6 1110.79   48.54
  -2   1  -6 1136.08   49.00
   2  -1   6 1104.90   48.62
   2  -1   7   40.03    5.19
  -2  -1  -7   38.83    3.81
  -2  -1  -7   31.30    5.56
  -2   1  -7   32.69    5.71
   2   1   7   39.69    5.13
  -2   1  -7   36.67    4.40
  -2  -1  -7   39.56    5.29
  -2  -1  -8  384.61   17.81
  -2   1  -8  410.79   18.14
  -2  -1  -8  384.02   18.71
  -2  -1  -9   35.14    5.14
  -2   1  -9   36.71    6.18
  -2   1 -10    7.41    7.58
  -2  -1 -10    2.17    4.98
  -2   1 -10    9.09    6.29
  -2   1 -11   17.91    6.06
  -2  -1 -11   22.87    5.15
  -2   1 -11   19.46    7.55
  -2  -1 -12    7.61    4.67
  -2   1 -12    3.89    5.54
  -2   1 -12    3.55    6.88
  -2  -1 -13  120.32    7.64
  -2   1 -13  145.43    8.38
  -2   1 -13  144.33    9.41
  -2   1 -14   18.76    4.41
  -2   1 -14   25.04    5.27
  -2  -1 -14   31.00    5.68
  -2   1 -14   23.24    5.39
  -2  -1 -14   20.50    3.47
  -2   1 -15  111.41    6.39
  -2  -1 -15  131.52    7.17
  -2   1 -15  130.28    7.03
  -2   1 -16    5.98    2.24
   2   2 -17   43.53    4.04
   2   2 -17   50.91    4.47
   2  -2 -16  149.46    8.41
   2   2 -16  206.76   10.05
   2  -2 -16  171.72    9.06
   2   2 -16  204.19    9.63
   2  -2 -15   63.56    6.59
   2   2 -15   70.93    6.82
   2  -2 -15   49.74    5.11
   2   2 -14    6.65    6.42
   2   2 -14   11.79    4.94
   2  -2 -14   12.43    6.46
   2  -2 -14   10.89    4.74
   2  -2 -13    7.30    6.88
   2   2 -13    3.67    5.64
   2  -2 -13    8.44    5.57
   2   2 -13   19.16    6.94
   2  -2 -13   10.86    5.07
   2  -2 -12   70.88    8.90
   2   2 -12   59.04    7.90
   2  -2 -12   76.38    6.59
   2  -2 -12   79.16    7.47
   2   2 -11  441.90   20.99
   2  -2 -11  419.59   19.86
   2  -2 -11  429.04   19.63
   2  -2 -11  419.84   20.80
   2  -2 -10  821.88   36.02
   2  -2 -10  833.16   36.22
   2   2 -10  826.51   37.21
   2  -2 -10  827.32   36.73
  -2   2  10  824.74   36.32
   2  -2  -9  203.94    9.73
   2  -2  -9  199.88   10.74
  -2   2   9  195.99   10.14
   2  -2  -9  160.86   10.78
   2  -2  -9  195.54    9.99
   2   2  -9  168.58   11.60
   2   2  -9  198.14   10.07
   2  -2  -8   65.17    5.07
   2   2  -8   65.62    5.04
   2  -2  -8   63.40    4.59
   2   2  -8   63.56    5.27
  -2   2   8   67.05    5.23
   2   2  -7   62.16    5.57
   2   2  -7   64.60    4.61
  -2   2   7   66.32    6.59
   2   2  -7   65.33    4.42
   2  -2  -7   65.93    4.24
   2  -2  -7   56.17    4.42
  -2   2   7   59.68    4.61
  -2  -2   7   71.39    5.27
   2   2  -6  537.04   23.62
  -2   2   6  504.69   22.80
   2   2  -6  515.46   22.75
   2   2  -6  542.81   23.45
   2   2  -6  522.70   22.82
   2   2  -6  526.32   22.73
  -2  -2   6  538.83   23.40
   2   2  -5   85.00    5.57
   2   2  -5   89.24    4.65
  -2  -2   5   85.71    5.27
   2   2  -4  177.61    8.55
  -2  -2   4  168.84    8.35
  -2  -2   3 5974.67  251.18
   2   2  -3 5980.40  251.26
   2  -2  -3 5893.48  251.38
  -2   2   2   46.32    4.14
   2  -2  -2   16.66    3.69
  -2   2   1  684.68   28.88
  -2   2   1  649.89   28.80
   2  -2   0  284.60   12.75
   2  -2   0  279.08   13.11
  -2  -2   0  290.62   12.28
  -2   2   0  255.82   12.89
   2  -2   1  115.69    5.95
  -2  -2  -2 2380.56  100.73
   2  -2   3  952.72   41.73
   2  -2   3 1002.09   41.64
  -2  -2  -3 1003.32   41.18
  -2   2  -3  937.61   41.67
   2   2   3  920.60   40.87
  -2  -2  -3  978.78   41.63
  -2   2  -4  915.59   40.87
  -2  -2  -4  939.64   40.87
   2  -2   4  930.23   40.88
  -2  -2  -4  947.44   40.37
   2  -2   4  949.76   40.77
   2   2   4  923.94   40.13
  -2   2  -5 3042.45  131.98
  -2  -2  -5 2970.93  131.90
   2  -2   5 3249.04  132.06
  -2  -2  -5 3052.86  131.13
  -2  -2  -5 3148.06  131.58
   2  -2   5 3142.35  131.84
  -2  -2  -6    4.92    4.50
   2  -2   6    2.58    3.88
  -2  -2  -6    4.94    2.38
  -2   2  -6    6.89    3.51
  -2   2  -6    3.86    4.45
  -2   2  -7 1103.12   45.68
  -2  -2  -7 1049.69   45.91
  -2  -2  -7 1035.38   45.34
  -2  -2  -8   49.95    4.64
  -2   2  -8   58.29    6.14
  -2  -2  -8   58.91    7.38
  -2   2  -8   56.19    6.86
  -2   2  -9  395.09   17.65
  -2  -2  -9  348.82   16.75
  -2  -2  -9  376.43   18.43
  -2   2  -9  357.44   17.94
  -2  -2 -10    0.14    4.58
  -2  -2 -10    5.84    8.26
  -2   2 -10   -1.76    6.71
  -2   2 -10    2.90    7.66
  -2  -2 -11  103.28    7.00
  -2   2 -11  119.12    9.42
  -2   2 -11  124.67    8.60
  -2  -2 -12   28.99    4.40
  -2   2 -12   39.06    7.05
  -2   2 -12   42.96    6.41
  -2   2 -13  225.03   11.37
  -2   2 -13  196.24   11.69
  -2   2 -13  210.46   11.77
  -2   2 -14   41.09    5.17
  -2   2 -14   42.87    5.56
  -2   2 -15   49.41    4.63
  -2   2 -15   57.81    4.30
  -2  -2 -15   57.73    4.89
   2   2  16   32.53    2.89
   2   3 -17   22.01    3.34
   2   3 -17   22.01    3.40
   2   3 -16    4.89    4.65
   2  -3 -16    2.67    3.98
   2  -3 -15   -5.07    5.76
   2   3 -15   -1.09    6.29
   2   3 -14   -3.95    7.01
   2  -3 -14   12.18    6.83
   2  -3 -14    2.32    3.87
   2  -3 -13   32.46    5.42
   2  -3 -13   36.01    7.53
   2  -3 -13   35.83    4.81
   2  -3 -12   35.89    8.51
   2  -3 -12   35.21    5.87
   2   3 -12   30.44    7.12
   2  -3 -12   32.88    5.16
   2   3 -12   37.74    7.23
   2  -3 -11   22.90    5.88
   2  -3 -11   25.85    8.27
   2   3 -11   17.58    6.62
   2  -3 -11   15.61    4.85
   2   3 -11   21.39    7.78
   2  -3 -10  477.69   20.40
  -2   3  10  487.02   21.07
   2  -3 -10  454.14   21.52
   2   3 -10  474.92   20.94
   2  -3 -10  476.56   20.73
   2  -3  -9   23.48    4.74
   2   3  -9   35.40    5.55
   2   3  -9   31.89    5.02
  -2   3   9   28.76    5.45
   2  -3  -9   29.24    4.09
   2  -3  -8   70.73    4.67
   2  -3  -8   72.60    5.26
  -2  -3   8   85.49    6.17
  -2   3   8   77.98    7.86
   2   3  -8   68.74    5.10
   2   3  -8   79.59    5.67
   2   3  -7   81.74    5.33
   2  -3  -7   87.05    4.94
   2   3  -7   86.51    5.62
  -2   3   7   88.34    7.60
   2  -3  -7   86.45    6.90
  -2  -3   7   95.49    6.18
   2  -3  -7   89.99    5.55
   2  -3  -6  767.04   32.84
   2   3  -6  756.16   31.81
   2  -3  -6  709.41   31.81
   2   3  -6  735.55   31.88
   2   3  -6  737.83   31.80
  -2   3   6  721.23   32.34
   2   3  -6  732.03   31.77
  -2  -3   6  767.99   32.44
  -2  -3   5  396.84   16.72
   2   3  -5  355.86   16.03
   2  -3  -4 1041.80   45.22
  -2  -3   4 1031.09   44.51
  -2  -3   4 1092.91   44.92
   2  -3  -3 1981.63   84.75
  -2  -3   3 1929.49   84.16
  -2  -3   3 2106.16   84.38
  -2  -3   2  579.19   24.54
  -2   3   2  565.96   25.25
   2  -3  -2  569.94   25.20
  -2   3   1    3.33    3.11
   2  -3   0  363.07   15.60
  -2  -3   0  330.70   15.00
  -2  -3  -1  592.53   26.04
   2  -3   1  681.34   26.76
   2  -3   2   19.99    2.94
  -2  -3  -2   18.69    2.40
   2  -3   2   23.92    4.06
   2  -3   3    8.15    3.73
  -2  -3  -3    8.12    2.41
   2  -3   4 3699.78  156.08
  -2   3  -4 3591.47  155.16
  -2   3  -4 3744.78  156.19
   2   3   4 3571.79  155.26
  -2  -3  -4 3877.23  155.56
  -2  -3  -5  131.45    8.71
  -2   3  -5  145.51    7.36
  -2  -3  -5  156.13    7.95
  -2   3  -5  137.62    8.76
   2  -3   5  147.13    8.61
   2   3   5  135.07    8.40
   2   3   5  139.09    7.30
  -2  -3  -6 1288.12   55.24
  -2   3  -6 1280.00   54.98
  -2   3  -6 1297.28   56.59
  -2  -3  -6 1259.27   56.31
  -2   3  -6 1238.64   55.14
  -2  -3  -6 1372.21   55.83
  -2   3  -7   86.11    6.84
  -2  -3  -7  102.32    7.87
  -2  -3  -8  908.03   39.04
  -2   3  -8  856.62   38.78
  -2  -3  -9    0.19    7.74
  -2   3  -9    7.07    6.97
  -2  -3 -10  696.69   31.31
  -2   3 -10  666.21   30.95
  -2  -3 -11   11.91    7.68
  -2   3 -11   11.05    6.70
  -2   3 -11   15.00    7.02
  -2   3 -11   16.36    6.44
  -2   3 -12   72.68    7.43
  -2   3 -12   75.46    7.49
  -2  -3 -12   65.55    8.73
  -2   3 -12   56.44    7.50
  -2   3 -13   36.34    6.34
  -2   3 -13   39.62    5.98
  -2   3 -14  221.31   11.41
  -2   3 -14  225.50   11.22
  -2   3 -15   14.73    3.12
  -2   3 -15   17.27    3.45
   2  -4 -16    0.16    3.75
   2   4 -16   -1.29    3.77
   2   4 -16   -1.85    4.16
   2   4 -15   48.92    6.44
   2  -4 -15   44.98    6.23
   2   4 -15   45.77    5.83
   2   4 -14    8.45    7.01
   2  -4 -14    2.44    6.53
   2   4 -14    4.76    5.74
   2   4 -13    5.05    6.11
   2   4 -13   11.03    8.19
   2  -4 -13    6.08    4.35
   2  -4 -13    6.33    7.20
   2   4 -12   19.99    6.47
   2  -4 -12    8.46    4.89
   2  -4 -12   11.97    8.07
   2   4 -12    8.85    9.46
   2   4 -11   28.82    6.92
   2   4 -11   40.59   11.37
   2  -4 -11   42.86    8.88
   2  -4 -11   28.33    5.64
   2   4 -10  151.92    9.71
   2  -4 -10  162.38    9.07
   2   4  -9  503.44   22.33
   2  -4  -9  480.13   22.13
  -2  -4   8  537.28   26.12
   2   4  -8  570.38   25.27
  -2   4   8  602.52   26.81
   2  -4  -8  581.20   25.30
   2  -4  -7  764.09   34.53
   2  -4  -7  776.49   33.20
   2   4  -7  799.06   34.25
  -2   4   7  749.84   35.61
  -2   4   7  742.79   33.31
  -2   4   7  759.48   33.94
  -2  -4   7  754.83   33.90
   2   4  -7  768.96   33.15
   2  -4  -6  177.38   10.02
   2  -4  -6  179.61    9.80
  -2  -4   6  181.52    9.22
   2   4  -6  188.19    9.47
  -2   4   6  170.61    8.90
   2   4  -6  173.07    8.59
  -2   4   6  181.27   10.95
  -2   4   6  175.63    9.73
   2  -4  -6  172.61    8.75
   2   4  -6  173.45    8.54
  -2  -4   5  815.42   33.79
   2   4  -5  780.71   33.31
  -2   4   5  749.59   33.46
   2  -4  -5  766.20   34.15
  -2  -4   5  761.66   33.26
  -2   4   5  759.83   33.69
  -2   4   5  808.16   34.95
   2   4  -5  787.96   33.58
  -2  -4   4  162.49    7.49
  -2  -4   4  170.35    7.94
  -2   4   4  150.99    8.07
  -2   4   4  155.58    7.79
   2  -4  -4  156.57    8.73
  -2   4   4  158.05    8.83
   2  -4  -3 3276.85  137.43
  -2  -4   3 3194.79  136.80
  -2  -4   3 3264.02  136.88
   2  -4  -2  980.91   43.38
  -2  -4   2 1042.59   42.62
  -2   4   2  914.61   43.31
  -2  -4   1 1523.64   61.19
  -2  -4   1 1464.48   61.33
  -2  -4   1 1392.11   60.78
  -2  -4   0 1849.79   71.47
   2  -4   0 2004.53   71.92
  -2   4   0 1775.53   71.79
  -2  -4  -1 3213.50  139.40
  -2   4  -1 3387.20  140.22
   2  -4   1 3409.67  140.33
   2  -4   1 3408.78  140.18
  -2   4  -2 1791.23   78.50
   2  -4   2 1945.17   78.80
  -2  -4  -2 1789.01   77.76
   2  -4   2 1891.00   78.39
  -2   4  -3 3292.97  140.28
  -2  -4  -3 3227.53  140.26
   2  -4   3 3389.68  141.12
  -2   4  -3 3318.63  140.15
   2  -4   3 3374.66  140.78
  -2   4  -3 3386.18  141.08
  -2   4  -4  107.81    6.29
  -2  -4  -4  102.74    5.88
   2  -4   4  114.17    7.21
  -2   4  -4  102.29    5.83
   2   4   4  102.01    6.86
   2  -4   4   96.62    7.16
   2  -4   5  324.95   15.85
  -2   4  -5  311.29   14.72
   2  -4   5  329.18   15.78
  -2  -4  -5  322.79   14.89
  -2   4  -5  306.42   14.39
   2   4   5  307.46   15.24
  -2   4  -6  171.65    8.99
  -2   4  -6  163.84    9.37
  -2   4  -6  163.36    9.25
   2   4   6  168.62   10.27
  -2   4  -7 1080.13   46.74
  -2  -4  -7 1063.44   46.90
  -2   4  -7 1050.96   46.73
  -2   4  -7 1096.15   46.51
  -2  -4  -8   -0.19    7.58
  -2   4  -8    3.95    6.50
  -2   4  -8    0.08    5.74
  -2   4  -8    1.32    6.44
  -2   4  -9  629.16   28.35
  -2   4  -9  613.28   28.70
  -2  -4  -9  639.13   29.11
  -2   4 -10  143.15   10.10
  -2  -4 -10  150.43   11.22
  -2   4 -11  536.85   24.98
  -2  -4 -11  535.22   25.44
  -2  -4 -12  269.69   14.61
  -2   4 -12  260.65   13.97
  -2   4 -13  170.92    9.93
  -2  -4 -13  168.11   10.35
  -2   4 -14    3.48    4.21
  -2   4 -14    3.51    3.98
  -2  -4 -14   -4.15    4.84
   2   4  15  111.36    6.23
  -2   4 -15  127.86    6.27
   2   5 -16    2.06    3.15
   2  -5 -16    6.18    3.37
   2  -5 -15   27.02    5.39
   2   5 -15   28.10    5.34
   2   5 -15   21.15    4.67
   2   5 -14   -3.28    6.60
   2   5 -14    1.65    5.16
   2  -5 -14    2.05    6.47
   2   5 -13   99.16    9.88
   2   5 -13   89.17    7.44
   2  -5 -13   96.77    8.90
   2  -5 -13   82.62    5.84
   2   5 -12  140.58    8.97
   2  -5 -12  118.99    7.72
   2  -5 -12  139.41   10.72
   2   5 -12  157.50   12.36
   2   5 -11   60.81   11.79
   2  -5 -11   66.14    9.55
  -2   5  11   74.19    8.08
   2  -5 -11   70.23    6.03
   2   5 -11   61.60    7.25
   2  -5 -10   11.75    5.06
  -2   5  10   17.10    7.02
   2   5 -10   13.29   11.19
   2   5 -10   17.16    6.14
   2  -5  -9 1131.91   48.28
  -2   5   9 1207.83   48.73
  -2   5   9 1200.80   49.72
   2   5  -9 1198.83   48.51
   2   5  -8  302.47   14.44
   2   5  -8  307.01   16.89
  -2   5   8  309.28   14.92
  -2   5   8  320.65   16.77
   2  -5  -8  290.50   14.29
   2  -5  -7 1166.59   50.39
  -2   5   7 1174.61   51.16
   2   5  -7 1166.51   50.37
   2   5  -7 1220.90   51.36
  -2   5   7 1156.19   50.56
   2   5  -6   38.29    3.76
   2  -5  -6   35.16    4.18
  -2   5   6   35.32    4.58
  -2   5   6   35.53    6.34
   2   5  -6   42.08    4.99
  -2  -5   6   37.49    4.22
   2  -5  -6   36.99    5.32
  -2   5   6   34.51    6.32
   2  -5  -6   34.09    5.54
  -2   5   5   16.67    4.93
  -2   5   5   15.28    3.83
  -2  -5   5   14.92    3.19
  -2   5   5   13.52    4.67
   2   5  -5   15.91    2.90
   2  -5  -5   18.55    4.69
  -2  -5   5   13.19    2.76
   2   5  -5   14.81    2.76
   2   5  -5   22.49    3.93
  -2   5   4  541.38   23.62
  -2   5   4  545.24   24.78
   2  -5  -4  550.79   24.53
  -2  -5   4  499.45   23.46
  -2  -5   4  557.40   23.69
  -2   5   4  554.92   23.86
  -2  -5   3  187.80    9.13
  -2   5   3  198.29    9.36
  -2   5   3  186.65    9.55
  -2  -5   3  203.57    9.17
  -2   5   2  731.12   31.49
  -2  -5   2  728.11   31.32
  -2   5   2  732.71   31.56
  -2  -5   1 1534.35   66.93
  -2  -5   1 1602.86   67.64
  -2  -5   1 1673.55   67.44
  -2   5   1 1574.23   67.19
  -2   5   1 1572.53   67.13
  -2   5   0    2.39    2.83
  -2   5   0    0.63    2.64
  -2  -5   0    2.14    3.09
   2  -5   0   -0.50    3.86
   2  -5   0    6.57    3.76
  -2  -5   0    0.90    2.82
   2   5   1  864.53   36.52
  -2   5  -1  867.40   37.42
   2  -5   1  898.67   37.53
  -2   5  -1  847.67   36.47
  -2  -5  -1  802.69   36.23
   2  -5   1  912.09   37.41
  -2   5  -2   31.99    3.12
  -2  -5  -2   30.25    2.72
  -2   5  -2   28.20    4.92
   2   5   2   30.10    3.98
   2  -5   2   30.75    4.43
   2  -5   2   32.52    4.79
  -2   5  -3  106.98    7.63
  -2   5  -3  108.46    5.80
  -2   5  -3  105.75    6.30
   2  -5   3   96.97    6.70
   2   5   3  106.97    6.80
   2   5   3  103.94    6.03
   2  -5   3  112.40    7.41
  -2  -5  -3  100.28    5.66
  -2   5  -4   29.31    6.02
   2  -5   4   29.78    4.03
   2  -5   4   18.73    4.87
  -2   5  -4   19.12    4.39
   2  -5   4   18.09    4.74
   2   5   4   23.36    5.39
  -2   5  -4   22.61    3.78
  -2   5  -5  132.46    7.46
   2   5   5  141.61    9.27
  -2   5  -5  130.04    8.07
  -2   5  -6   98.61    7.61
   2   5   6   96.73    9.20
  -2   5  -6  106.19    6.79
  -2   5  -7    3.23    5.20
  -2  -5  -7    5.07    7.46
  -2   5  -7    0.37    6.27
  -2   5  -8   99.53    7.92
  -2  -5  -8  107.23    9.89
  -2   5  -8   97.25    8.57
  -2   5  -9  110.00    9.07
  -2  -5  -9  114.73   10.92
  -2   5  -9   97.77    8.54
  -2  -5 -10  293.22   16.24
  -2   5 -10  318.20   15.83
  -2   5 -10  304.15   15.39
  -2   5 -11  208.27   12.26
  -2  -5 -11  210.75   12.81
  -2   5 -11  220.10   11.81
  -2   5 -12  352.93   17.17
  -2   5 -12  337.49   16.88
  -2  -5 -12  369.21   17.55
  -2  -5 -13  251.48   12.32
  -2   5 -13  253.44   12.03
  -2   5 -13  233.08   11.77
   2   5  14   28.04    3.57
  -2  -5 -14   30.52    4.49
  -2  -5 -15   -0.69    2.40
   2  -6 -16   99.19    5.69
   2   6 -16  118.04    5.62
   2  -6 -15   21.71    4.77
   2   6 -15   22.15    3.92
   2  -6 -14  657.05   28.91
   2   6 -14  632.75   28.47
   2   6 -13   38.80    5.65
   2   6 -13   49.61    8.51
   2  -6 -13   46.89    7.84
   2   6 -12  316.27   19.07
   2   6 -12  336.31   16.31
   2  -6 -12  355.04   17.75
   2   6 -11  168.19    9.38
   2  -6 -11  148.02    8.31
   2  -6 -11  167.49   11.30
  -2   6  11  161.56   10.10
  -2   6  10   81.14    8.04
   2   6 -10   88.86    6.99
   2  -6 -10   77.78    5.98
   2  -6  -9   80.86    6.39
   2   6  -9   64.97   11.63
   2   6  -9   85.99    6.91
  -2   6   9   83.82   12.25
  -2   6   9   83.87    7.60
   2   6  -8 1291.70   55.91
  -2   6   8 1292.42   55.38
   2   6  -8 1254.00   54.09
   2  -6  -8 1215.58   53.99
  -2   6   8 1273.51   54.42
  -2   6   7    5.55    5.64
   2  -6  -7    3.95    4.30
   2   6  -7    3.21    3.90
   2   6  -7    2.39    6.53
  -2   6   7   -3.38    8.53
   2   6  -6  892.11   38.14
   2  -6  -6  868.38   37.53
  -2   6   6  857.87   38.42
  -2   6   6  862.42   37.74
   2   6  -6  855.99   37.32
  -2   6   5  623.35   27.28
  -2   6   5  611.55   27.75
  -2   6   4  932.74   39.96
  -2   6   4  915.25   40.25
  -2   6   3  137.05    7.33
  -2  -6   3  122.00    7.08
  -2  -6   3  138.27    7.79
  -2   6   3  150.48    7.89
  -2   6   2   12.66    3.51
  -2  -6   2   14.55    2.24
  -2   6   2   14.02    4.03
   2   6  -2   11.15    3.52
  -2  -6   2    9.11    3.13
  -2  -6   2   13.31    2.93
  -2  -6   1  791.16   32.81
   2   6  -1  769.61   32.42
  -2  -6   1  686.44   32.03
   2  -6  -1  772.72   33.55
  -2   6   1  757.36   32.50
  -2   6   1  759.42   32.35
  -2  -6   1  777.07   33.11
   2  -6   0    7.60    4.21
   2   6   0    8.81    3.58
  -2  -6   0    8.36    3.47
  -2   6   0   11.91    3.65
  -2   6   0    5.76    3.25
  -2  -6   0   11.06    3.32
   2   6   1   34.01    4.30
   2  -6   1   33.89    4.96
   2  -6   1   31.22    4.72
  -2  -6  -1   35.26    4.60
  -2   6  -1   30.20    3.84
  -2   6  -1   30.57    4.27
  -2   6  -2   12.09    3.38
   2  -6   2   15.68    4.21
  -2   6  -2   13.36    2.78
  -2  -6  -2   15.90    4.70
   2   6   2   18.00    4.48
   2  -6   2   12.41    4.59
   2   6   3   25.75    5.32
  -2   6  -3   21.67    3.46
   2   6   4  104.73    6.93
   2   6   4  108.83    8.12
  -2   6  -4  109.02    6.48
  -2   6  -5    8.24    5.71
  -2   6  -5    8.34    4.61
   2   6   5    8.48    5.36
   2   6   5    8.66    7.23
  -2   6  -6   18.57    6.52
  -2   6  -6   16.97    5.26
   2   6   6   25.11    9.14
  -2   6  -7   52.88    7.39
  -2   6  -7   55.89    6.46
   2   6   7   69.12    9.96
  -2  -6  -8    6.07    8.47
  -2   6  -8    8.46    5.91
  -2   6  -8   10.41    7.20
  -2  -6  -9    4.84    7.61
  -2   6  -9    2.55    6.72
  -2   6  -9    3.79    5.68
  -2   6 -10   77.70    6.97
  -2   6 -10   69.30    7.75
  -2  -6 -10   79.72    8.71
  -2   6 -11  156.08    9.90
  -2  -6 -11  158.06   10.34
   2   6  11  136.78    9.63
  -2   6 -11  146.66    9.06
  -2   6 -12  119.97    7.18
  -2  -6 -12  104.97    8.17
  -2  -6 -13   49.43    5.39
  -2   6 -13   50.94    4.54
   2   6  13   36.87    3.96
  -2   6 -13   43.74    3.90
  -2   6 -14  270.73   12.39
  -2  -6 -14  275.56   12.57
   2   7 -15  348.71   16.25
   2  -7 -15  406.06   16.73
   2   7 -14    0.43    3.41
   2  -7 -14   -7.02    5.17
   2  -7 -13  385.54   18.36
   2   7 -13  369.45   17.25
   2  -7 -12   13.01    7.82
   2   7 -12   10.34    4.81
   2   7 -11  226.63   11.69
  -2   7  11  224.93   12.27
  -2   7  10    1.78    5.93
   2   7 -10    2.37    4.70
  -2   7   9    4.69    6.32
   2   7  -9    2.77    4.57
  -2   7   9    8.46   11.43
  -2   7   8   78.26    7.48
   2  -7  -8   58.09    5.62
   2   7  -8   60.63    5.68
  -2   7   8   82.36   12.24
  -2   7   7 1255.22   52.74
  -2   7   7 1219.07   53.66
   2  -7  -7 1184.54   52.28
   2  -7  -6    0.58    4.50
  -2   7   6   -1.39    8.46
  -2   7   6   -2.66    5.36
  -2   7   5 1293.10   55.97
  -2   7   5 1260.92   55.47
   2  -7  -5 1305.48   55.30
  -2   7   4  451.02   21.20
   2   7  -4  448.61   20.69
  -2   7   4  456.17   20.59
  -2   7   3  308.92   15.11
  -2   7   3  321.24   15.57
   2   7  -3  331.50   15.08
  -2   7   2  724.22   32.76
   2   7  -2  759.39   32.64
  -2   7   2  750.63   32.55
  -2   7   1  149.49    8.32
  -2   7   1  154.34    8.85
   2   7  -1  164.01    8.60
  -2   7   0  302.92   14.18
   2   7   0  308.50   14.43
  -2   7   0  299.48   14.53
   2   7   1   21.44    5.08
  -2   7  -1   20.27    4.12
  -2   7  -1   20.22    5.11
  -2  -7  -1   15.88    4.88
  -2   7  -2   47.80    4.72
   2   7   2   34.91    6.12
  -2   7  -2   39.91    5.68
  -2   7  -3    7.01    4.44
  -2   7  -3    6.81    3.39
   2   7   3    0.08    6.51
  -2   7  -4   66.62    5.92
  -2   7  -4   67.84    5.29
   2   7   4   69.99    8.43
  -2   7  -5    0.33    5.02
  -2   7  -5    3.10    4.38
   2   7   5    5.35    8.64
  -2   7  -6  102.69    7.30
   2   7   6   81.01   10.68
  -2   7  -7  114.24    7.40
   2   7   7  128.94   11.07
  -2  -7  -8   51.95    8.32
  -2   7  -8   53.87    6.28
  -2  -7  -9   10.40    7.56
  -2   7  -9   11.23    5.14
   2   7   9   -0.18    7.03
  -2  -7 -10   84.26    8.14
  -2   7 -10   84.39    6.59
  -2  -7 -11  107.28    8.27
  -2   7 -11  108.42    7.04
  -2   7 -11   98.60    6.75
  -2  -7 -12   11.89    5.26
  -2   7 -12   11.86    3.94
  -2  -7 -13   77.05    5.49
   2  -8 -14  249.40   12.71
   2   8 -14  285.60   12.65
   2  -8 -13    3.58    5.42
   2   8 -12  188.86   10.03
   2  -8 -12  246.69   12.09
   2  -8 -11   33.95    8.27
   2   8 -11   24.60    4.19
  -2   8  10   76.19    6.82
  -2   8   9   94.40    7.63
  -2   8   9   96.73   11.91
  -2   8   8  210.72   11.58
  -2   8   8  221.44   14.98
  -2   8   7   20.58    6.22
  -2   8   7    8.02   10.31
   2   8  -6   26.98    7.20
  -2   8   6   20.83    6.08
  -2   8   6   24.13    9.88
   2  -8  -6   15.68    4.66
   2  -8  -5  374.11   18.11
  -2   8   5  407.87   18.67
  -2   8   5  414.50   20.15
   2   8  -5  398.47   18.98
   2   8  -4   95.55    7.92
  -2   8   4   91.55    9.17
  -2   8   4   99.32    7.32
  -2   8   3  480.48   22.55
   2   8  -3  474.12   22.06
  -2   8   3  486.03   21.97
  -2   8   2   13.84    6.46
  -2   8   2   13.98    4.96
   2   8  -2    6.03    5.58
  -2   8   1  832.69   37.17
   2   8  -1  854.37   37.48
  -2   8   1  877.34   37.64
   2   8   0   59.33    6.66
  -2   8   0   55.34    5.51
  -2   8   0   41.78    6.80
  -2   8  -1  169.14   10.13
   2   8   1  175.99   10.32
  -2   8  -1  158.14    9.05
  -2   8  -2    7.51    4.56
   2   8   2   12.63    6.70
  -2   8  -2   18.69    6.48
   2   8   3  489.16   22.84
  -2   8  -3  480.42   22.45
  -2   8  -3  473.23   21.79
  -2   8  -4   22.63    5.38
  -2   8  -4   21.01    6.76
   2   8   4   25.04    9.18
  -2   8  -5  228.80   11.48
   2   8   5  257.36   14.70
  -2   8  -5  235.16   12.46
  -2   8  -6   44.25    6.04
  -2   8  -6   33.60    4.71
   2   8   6   40.05    9.41
  -2   8  -7  121.60    7.37
  -2   8  -7  110.92    8.29
   2   8   7  127.90   10.72
  -2  -8  -8   97.38    8.66
  -2   8  -8   88.48    6.43
  -2   8  -8   83.29    7.15
  -2   8  -9  229.46   11.10
  -2   8  -9  198.51   11.50
  -2  -8  -9  234.39   12.57
  -2  -8 -10  107.72    8.06
  -2   8 -10   93.96    6.41
  -2  -8 -11  128.29    8.15
  -2  -8 -12   29.53    4.31
  -2   8 -12   20.58    4.06
  -2   8 -13   10.71    2.39
  -2  -8 -13    9.37    2.48
   2  -9 -13    4.00    4.16
   2   9 -13    1.60    3.90
   2   9 -12   -5.17    6.06
   2  -9 -12    4.29    5.57
   2  -9 -11   30.61    7.04
   2   9 -11   15.59    8.38
   2   9 -10    9.15    8.98
  -2   9   9    4.04    9.93
  -2   9   9   -0.34    5.01
   2   9  -9   -1.80    9.54
  -2   9   8  216.48   14.39
   2   9  -8  174.39   13.74
  -2   9   8  199.41   10.86
  -2   9   7   11.89    5.43
   2   9  -7    6.94    8.14
   2   9  -6   36.23    7.32
  -2   9   6   14.03    9.04
  -2   9   6   22.28    5.73
  -2   9   5   94.18   10.42
   2   9  -5   88.98    8.23
  -2   9   5   75.44    7.28
  -2   9   4  346.91   17.03
   2   9  -4  330.74   17.37
  -2   9   3  122.57    8.54
  -2   9   3  140.96   10.74
   2   9  -3  144.11    9.57
  -2   9   2  246.37   14.11
   2   9  -2  254.50   13.36
  -2   9   2  244.72   12.81
  -2   9   1  203.12   11.31
   2   9  -1  227.66   12.42
  -2   9   1  221.91   12.87
   2   9   0  640.19   28.41
  -2   9   0  650.62   28.61
  -2   9   0  591.39   27.73
   2   9   1  432.89   19.91
  -2   9  -1  423.14   19.82
  -2   9  -1  374.80   18.78
   2   9   2 1471.11   59.90
  -2   9  -2 1463.80   59.82
   2   9   3   34.44    8.40
  -2   9  -3   48.18    7.49
  -2   9  -3   43.75    5.70
  -2   9  -4  619.15   26.99
  -2   9  -4  549.71   26.41
   2   9   4  595.34   27.39
  -2   9  -5   10.01    6.62
  -2   9  -5   -2.40    5.34
   2   9   5   15.41    8.32
   2   9   6  359.51   18.56
  -2   9  -6  351.16   17.67
  -2   9  -7   57.89    7.20
  -2  -9  -7   60.90    7.60
   2   9   7   55.41    8.80
  -2  -9  -8  395.13   18.97
  -2   9  -8  386.92   18.86
  -2   9  -9    9.90    5.52
  -2  -9  -9    5.71    5.96
  -2   9 -10  203.99   10.50
  -2  -9 -10  192.13   10.52
  -2  -9 -11    9.65    3.90
  -2   9 -11   11.66    3.87
  -2   9 -12   65.54    4.16
   2  10 -12   -0.62    3.86
   2 -10 -12   -0.16    3.91
   2  10 -11    6.44    6.29
   2  10 -10    7.06    8.09
   2  10  -9   70.49    9.90
  -2  10   8   35.99    5.07
  -2  10   8   42.49    9.69
   2  10  -7   -0.51    8.46
  -2  10   7   -0.16    4.60
  -2  10   7   17.50    9.64
   2  10  -6   22.55    7.83
  -2  10   6   29.16    9.95
  -2  10   6   19.71    4.88
  -2  10   5    9.91    4.94
  -2  10   5    8.85    8.96
   2  10  -5   12.63    6.92
  -2  10   4  225.77   13.62
   2  10  -4  227.38   12.43
  -2  10   4  204.98   11.26
  -2  10   3   25.09    4.93
   2  10  -3   28.72    6.74
  -2  10   3   33.50    8.51
  -2  10   2  228.77   13.34
   2  10  -2  228.96   12.18
  -2  10   2  194.39   10.97
   2  10  -1  370.62   17.30
  -2  10   1  382.17   17.74
  -2  10   0   49.10    7.92
   2  10   0   41.78    7.43
   2  10   1  645.31   29.95
  -2  10  -1  670.25   30.09
   2  10   2    3.84    7.28
  -2  10  -2    2.65    7.17
   2  10   3 1074.72   47.45
  -2  10  -3 1072.09   47.23
   2  10   4  154.94   11.76
  -2  10  -4  179.25   10.96
   2  10   5  356.96   18.14
  -2  10  -5  342.39   17.30
   2  10   6   21.04    8.20
  -2  10  -6   17.75    6.46
  -2  10  -7   88.18    7.42
  -2 -10  -7   75.98    7.56
  -2  10  -8   -3.48    5.13
  -2 -10  -8    4.60    5.43
  -2 -10  -9  197.89   10.49
  -2  10  -9  210.71   10.58
  -2 -10 -10    2.00    3.41
  -2  10 -10    1.57    3.65
  -2  10 -11   85.89    4.82
   2  11 -10   45.98    6.23
   2  11  -9   34.60    7.80
   2  11  -8   67.92    9.59
   2  11  -7   77.29   10.05
   2  11  -6  149.58   11.39
   2  11  -5  119.95    9.88
  -2  11   4  126.55   10.97
   2  11  -4  140.51   10.00
  -2  11   3  294.35   15.78
   2  11  -3  268.43   14.92
  -2  11   2   93.99    9.38
   2  11  -2   74.36    7.93
   2  11  -1   19.55    6.89
  -2  11   1   21.59    7.94
  -2  11   0  129.16    9.98
   2  11   0  120.30    9.47
   2  11   1   -3.13    7.07
  -2  11  -1    1.69    7.64
  -2  11  -2  569.91   25.33
   2  11   2  511.75   25.35
   2  11   3   -5.17    7.46
  -2  11  -3    4.92    6.74
   2  11   4  284.29   15.38
  -2  11  -4  280.35   14.66
   2  11   5   -5.93    7.40
  -2  11  -5    0.37    5.88
  -2  11  -6  164.11    9.13
  -2 -11  -6  127.83    8.51
  -2  11  -7   97.46    6.74
  -2 -11  -7   81.59    6.28
  -2 -11  -8   35.94    4.23
  -2  11  -8   52.62    4.83
  -2  11  -9   84.21    5.34
   2  12  -8   80.62    8.13
   2  12  -7   -6.99    7.80
   2  12  -6   26.94    8.05
   2  12  -5    0.82    7.23
   2  12  -4  127.22    9.84
   2  12  -3   15.27    6.83
   2  12  -2  219.13   12.40
   2  12  -1   17.15    6.78
   2  12   0   97.13    8.70
  -2  12   0  117.38    8.80
  -2  12  -1   71.54    7.71
   2  12   1   76.07    7.86
   2  12   2    8.09    6.66
  -2  12  -2   13.64    6.21
   2  12   3   14.36    6.52
  -2  12  -3    5.59    5.68
  -2  12  -4   20.87    5.63
   2  12   4   24.44    6.38
  -2  12  -5   45.81    5.56
  -2  12  -6   26.23    4.57
  -2  12  -7    7.62    3.50
   2 -13  -7   19.81    3.30
   2  13  -5   11.15    6.60
   2  13  -4    5.04    6.67
   2  13  -3   67.10    7.63
   2  13  -2    2.76    6.05
   2  13  -1   95.13    7.97
   2  13   0   28.30    5.98
   2  13   1   15.34    5.49
  -2  13  -2  106.12    7.01
   2  13   2   98.25    7.25
   2  13   3   -4.03    4.22
  -2  13  -3    3.27    4.30
  -2  13  -4   24.15    4.17
  -2  13  -5    1.55    3.20
   3   0 -17   -3.77    3.89
   3   0 -17   -3.84    3.33
   3   0 -16  181.16    9.72
   3   0 -15   -4.73    5.51
   3   0 -14  383.71   17.75
   3   0 -14  401.25   17.77
   3   0 -13   -0.65    5.68
   3   0 -13    1.93    6.10
   3   0 -13    2.54    6.44
   3   0 -12  200.48   12.09
   3   0 -12  208.80   11.93
   3   0 -12  214.70   12.08
   3   0 -11    4.52    6.44
   3   0 -11   -3.11    5.96
   3   0 -11    4.42    6.13
   3   0 -10  324.44   15.05
   3   0 -10  320.97   15.51
   3   0 -10  290.47   15.09
   3   0  -9    2.69    5.04
  -3   0   9   -1.80    3.82
   3   0  -9    5.81    4.25
   3   0  -8  858.59   36.47
   3   0  -8  827.13   37.06
   3   0  -8  838.51   37.54
  -3   0   8  841.26   36.41
   3   0  -7   -0.71    3.27
   3   0  -7    4.22    3.48
   3   0  -7    0.67    3.54
   3   0  -7   -1.70    3.84
   3   0  -6  348.43   16.15
   3   0  -6  340.42   15.32
   3   0  -5    0.07    3.45
   3   0  -5    0.16    2.04
   3   0  -4 1058.01   45.51
   3   0  -3    1.78    2.19
  -3   0   2  562.69   25.49
   3   0  -2  651.68   25.78
  -3   0   1    0.56    2.72
   3   0  -1   -2.69    3.51
   3   0   0 1948.64   83.36
  -3   0   0 1967.01   83.20
   3   0   1   -3.25    4.47
  -3   0  -1    2.03    3.59
  -3   0  -2 1720.34   74.16
   3   0   2 1743.95   73.90
   3   0   3    0.81    0.94
   3   0   3    0.14    3.08
  -3   0  -3    1.61    3.63
  -3   0  -4 1875.21   76.81
  -3   0  -4 1772.17   75.65
  -3   0  -4 1786.89   75.82
   3   0   4 1732.31   76.31
  -3   0  -5    0.06    3.99
   3   0   5   -1.83    3.67
  -3   0  -5   -1.27    2.92
  -3   0  -6 2645.79  113.24
   3   0   6 2602.26  114.34
  -3   0  -6 2746.38  113.55
  -3   0  -7    0.92    5.68
  -3   0  -7   -0.35    4.01
  -3   0  -8 1281.04   54.73
  -3   0  -8 1245.71   54.26
  -3   0  -9    6.07    5.24
  -3   0  -9   -0.19    7.63
  -3   0 -10   18.11    5.72
  -3   0 -10   26.41    7.69
  -3   0 -11    1.14    4.95
  -3   0 -11   -5.54    6.91
  -3   0 -12  166.45    9.30
  -3   0 -13   -3.91    3.87
  -3   0 -14  163.17    8.04
  -3   0 -14  139.76    7.31
  -3   0 -15    0.57    2.21
   3  -1 -17   61.40    4.27
   3   1 -17   59.46    4.85
   3   1 -17   58.98    4.96
   3   1 -16   17.23    5.05
   3  -1 -16   14.87    4.08
   3   1 -15  108.27    7.64
   3  -1 -15   94.10    6.84
   3   1 -14   21.51    6.48
   3  -1 -14   12.23    6.13
   3  -1 -14   18.81    5.53
   3  -1 -14   15.22    5.65
   3   1 -13  450.02   23.09
   3   1 -13  540.00   23.79
   3  -1 -13  478.23   23.49
   3  -1 -13  539.33   23.60
   3   1 -13  529.91   23.73
   3  -1 -13  522.08   23.30
   3  -1 -12  873.72   37.86
   3  -1 -12  866.02   38.02
   3   1 -12  824.39   38.01
   3   1 -12  890.29   38.22
   3  -1 -12  840.95   38.13
   3   1 -11 1261.38   53.16
   3  -1 -11 1240.69   53.09
   3  -1 -11 1219.01   53.20
   3   1 -11 1211.08   53.44
   3  -1 -11 1194.59   53.33
   3  -1 -10  594.98   27.29
   3  -1 -10  602.51   27.01
  -3   1  10  589.40   26.88
   3   1 -10  631.53   27.74
   3  -1 -10  610.77   26.91
   3  -1  -9 2487.54  103.79
   3  -1  -9 2494.06  104.02
  -3   1   9 2430.10  103.83
   3   1  -9 2368.91  103.91
   3  -1  -9 2428.56  103.88
   3   1  -8  526.91   23.58
   3  -1  -8  537.19   22.50
  -3   1   8  520.23   22.26
   3   1  -8  546.49   22.48
   3  -1  -8  518.68   22.40
   3  -1  -8  508.00   23.49
   3  -1  -8  535.04   22.32
   3   1  -7  378.97   17.64
   3   1  -7  378.27   18.52
  -3   1   7  352.70   17.57
   3  -1  -7  398.96   17.71
   3   1  -7  374.78   17.73
   3  -1  -7  366.48   18.62
   3   1  -6    9.28    3.25
   3   1  -6    9.99    1.47
   3   1  -6   12.27    2.80
   3  -1  -6   14.94    2.95
   3  -1  -6   17.05    4.17
   3   1  -6   12.64    3.73
   3   1  -6   14.08    2.89
   3  -1  -5   80.44    5.62
   3   1  -5   82.77    5.41
   3  -1  -5   78.56    4.79
   3   1  -4    0.37    2.83
   3  -1  -4    2.46    2.46
   3   1  -3 1565.68   66.54
  -3   1   2  992.82   43.84
   3  -1  -2 1070.51   44.00
  -3  -1   1 1322.19   54.78
  -3   1   1 1233.57   54.93
   3  -1  -1 1329.94   55.19
  -3   1   1 1277.12   54.81
  -3   1   0    1.80    3.40
   3   1   0    5.93    2.13
   3  -1   0    2.62    3.83
  -3  -1   0    4.05    3.33
   3  -1   1   24.02    4.11
   3   1   1   22.22    2.63
  -3   1  -1   20.62    3.93
  -3  -1  -1   24.65    3.74
  -3  -1  -2  312.51   14.38
   3   1   2  301.52   13.84
   3  -1   2  310.37   14.58
   3  -1   2  301.20   13.43
  -3   1  -2  321.61   14.46
   3  -1   3   23.51    3.77
   3   1   3   25.77    3.30
  -3   1  -3   25.83    4.18
  -3  -1  -3   32.21    4.45
   3  -1   3   26.39    4.69
   3  -1   3   26.37    2.24
  -3   1  -4  603.53   23.01
   3  -1   4  612.27   23.73
  -3  -1  -4  588.13   22.98
  -3   1  -4  610.46   22.83
  -3  -1  -4  617.31   24.06
   3   1   4  602.80   23.56
   3  -1   5  563.59   25.72
  -3  -1  -5  562.34   24.59
  -3   1  -5  567.36   24.71
  -3  -1  -5  542.08   25.87
   3   1   5  565.31   25.56
  -3   1  -5  574.97   25.01
  -3  -1  -5  576.47   24.98
  -3   1  -6  110.70    7.03
   3  -1   6   98.67    7.29
  -3  -1  -6  104.59    5.94
   3   1   6  103.73    7.17
  -3  -1  -6  112.81    7.18
  -3   1  -6  107.71    6.37
  -3  -1  -7  627.81   27.90
  -3   1  -7  638.14   28.15
  -3  -1  -7  650.31   28.62
  -3   1  -7  648.23   28.63
  -3   1  -8   61.26    7.66
  -3  -1  -8   55.07    5.23
  -3  -1  -8   54.55    7.59
  -3   1  -8   56.09    6.13
  -3  -1  -9  366.28   18.05
  -3  -1  -9  350.18   16.69
  -3   1  -9  352.61   17.18
  -3   1  -9  360.78   18.02
  -3  -1 -10  133.39    8.54
  -3   1 -10  139.21    9.29
  -3  -1 -11  254.64   13.37
  -3   1 -11  299.17   13.89
  -3  -1 -11  279.05   14.77
  -3  -1 -12    2.17    6.66
  -3  -1 -12   -2.95    4.05
  -3   1 -12   -3.08    5.05
  -3   1 -13  274.77   12.55
  -3   1 -13  266.69   12.22
  -3  -1 -13  268.38   12.92
  -3   1 -14   10.04    3.75
  -3   1 -14    3.73    3.09
  -3   1 -15   89.73    4.93
   3   1  15   99.28    5.49
   3   2 -17    0.16    3.42
   3   2 -17    2.22    3.77
   3  -2 -16   42.55    4.40
   3   2 -16   61.62    5.77
   3  -2 -16   44.61    4.34
   3   2 -16   56.43    5.90
   3  -2 -15   11.39    5.12
   3   2 -15   16.02    6.09
   3  -2 -15    8.42    4.40
   3  -2 -14   18.36    5.99
   3  -2 -14   17.79    5.66
   3  -2 -14   16.35    5.17
   3  -2 -13   46.90    5.87
   3  -2 -13   55.72    6.68
   3  -2 -13   45.16    7.35
   3  -2 -12   73.15    6.81
   3  -2 -12   80.56    8.87
   3  -2 -12   86.23    7.85
   3   2 -11  725.55   32.00
   3  -2 -11  716.26   31.79
   3  -2 -11  713.92   32.11
  -3   2  11  697.68   31.73
   3  -2 -11  712.61   31.52
   3  -2 -10  384.75   17.97
   3  -2 -10  375.95   17.70
   3  -2 -10  390.40   18.50
   3   2 -10  380.45   18.21
   3   2 -10  383.79   18.03
  -3   2  10  384.83   18.02
   3   2  -9 1143.91   47.55
  -3   2   9 1074.95   47.51
   3  -2  -9 1085.04   47.35
   3   2  -9 1123.22   47.67
   3  -2  -9 1083.44   47.57
   3   2  -8  221.81   10.89
   3   2  -8  228.68   12.24
   3  -2  -8  232.54   10.78
   3  -2  -8  222.49   11.02
   3   2  -8  223.02   10.97
   3  -2  -8  222.30   12.14
  -3   2   8  217.28   10.92
   3  -2  -7 1209.62   52.93
   3   2  -7 1254.93   52.86
   3   2  -7 1200.13   52.90
  -3   2   7 1228.01   52.91
  -3   2   7 1306.37   53.39
   3   2  -7 1232.27   52.95
   3   2  -7 1285.05   53.93
   3  -2  -7 1213.00   53.92
   3  -2  -6  435.68   19.55
   3   2  -6  422.35   19.29
   3   2  -6  420.38   18.54
   3   2  -6  412.77   18.53
   3  -2  -6  415.81   18.57
   3   2  -6  420.82   18.46
   3  -2  -6  427.63   18.92
  -3   2   6  413.82   18.51
   3   2  -5 1892.07   80.08
   3  -2  -5 1862.18   79.89
   3  -2  -4  201.52    9.58
   3   2  -4  195.54    9.46
   3   2  -3 1821.76   77.19
   3  -2  -2  658.63   25.20
  -3   2   2  645.93   25.06
  -3   2   2  671.67   25.29
   3  -2  -1  649.91   28.40
  -3   2   1  632.55   28.24
  -3  -2   1  679.89   27.90
  -3   2   1  624.08   28.08
   3  -2   0 2338.77   93.06
  -3  -2   0 2244.30   92.61
  -3  -2   0 2133.64   92.13
   3  -2   1 1187.70   50.00
  -3  -2  -1 1151.93   50.23
   3  -2   1 1166.86   50.53
   3  -2   2 1432.22   57.08
   3  -2   2 1309.43   57.77
  -3  -2  -2 1382.13   57.54
   3   2   2 1409.74   57.13
  -3  -2  -3  206.52   10.95
   3  -2   3  222.34   10.04
   3  -2   3  221.75   10.91
   3   2   3  229.44   10.54
  -3   2  -3  202.88   10.09
   3  -2   4   85.09    6.17
  -3  -2  -4   74.92    6.11
  -3  -2  -4   76.22    5.23
  -3   2  -4   69.94    5.90
   3   2   4   82.79    5.60
  -3   2  -4   70.24    5.11
  -3   2  -5 1335.79   55.73
  -3  -2  -5 1252.35   56.88
  -3   2  -5 1314.42   57.01
   3  -2   5 1300.49   56.74
  -3   2  -5 1307.16   55.88
  -3  -2  -5 1284.02   55.85
  -3   2  -6  565.09   24.64
  -3  -2  -6  539.49   23.94
  -3   2  -6  556.08   24.30
  -3  -2  -6  542.45   24.58
  -3   2  -7  884.19   38.68
  -3   2  -7  924.69   38.44
  -3  -2  -7  886.53   38.73
  -3  -2  -7  848.38   37.94
  -3   2  -8  222.34   11.49
  -3  -2  -8  236.34   12.32
  -3  -2  -9  233.14   13.12
  -3  -2  -9  204.33   10.84
  -3   2  -9  228.73   12.20
  -3  -2 -10    1.24    7.56
  -3  -2 -10    2.00    4.07
  -3   2 -10   -1.88    6.20
  -3   2 -11  117.85    8.55
  -3  -2 -11  120.92    9.61
  -3   2 -12  213.60   11.39
  -3   2 -12  203.47   11.39
  -3  -2 -12  219.50   12.35
  -3  -2 -13   -2.55    5.72
  -3   2 -13    1.50    4.59
  -3   2 -13   -2.77    4.53
  -3   2 -14  130.21    7.23
  -3   2 -14  129.90    7.05
  -3  -2 -14  138.82    7.80
   3  -2  15    9.94    2.24
  -3  -2 -15   15.25    2.92
   3   2  15   12.31    3.03
   3   3 -17   -1.09    3.09
   3   3 -16   18.37    4.67
   3  -3 -16   12.42    3.84
   3  -3 -15    8.75    3.56
   3  -3 -15   10.62    5.37
   3   3 -15   17.60    5.89
   3   3 -14  150.88   10.06
   3  -3 -14  140.08    8.45
   3   3 -14  141.08    9.46
   3  -3 -14  119.97    7.66
   3  -3 -14  125.73    9.10
   3  -3 -13   47.00    5.33
   3  -3 -13   48.49    7.57
   3   3 -13   48.98    7.13
   3  -3 -13   55.06    6.36
   3   3 -12   45.90    7.38
   3  -3 -12   46.74    8.27
   3  -3 -12   44.34    5.72
   3  -3 -12   51.68    7.02
   3  -3 -11   11.77    6.24
   3   3 -11   12.00    6.45
   3  -3 -11   17.54    5.08
  -3   3  11   15.76    6.61
   3  -3 -11   14.88    8.03
   3  -3 -10  421.23   19.69
  -3   3  10  452.94   20.30
   3   3 -10  439.79   20.38
   3  -3 -10  431.77   20.13
   3   3 -10  430.77   20.13
  -3   3   9   34.14    5.58
   3  -3  -9   32.71    4.54
   3   3  -9   31.76    5.35
   3   3  -9   33.28    5.55
   3  -3  -9   30.55    5.49
   3  -3  -8  584.55   25.64
   3  -3  -8  577.17   26.52
  -3   3   8  607.08   26.75
   3   3  -8  572.84   25.99
   3  -3  -8  580.01   25.94
  -3   3   8  601.95   26.01
   3   3  -8  588.70   25.81
   3   3  -7   98.34    6.32
   3   3  -7  105.15    6.16
  -3   3   7  107.41    7.98
   3   3  -7   99.60    6.05
   3  -3  -7  111.84    6.86
   3  -3  -7   97.00    6.28
  -3   3   7  113.45    6.48
   3   3  -6 1091.97   46.49
   3  -3  -6 1128.46   47.13
   3   3  -6 1077.54   46.40
  -3   3   6 1119.49   46.84
   3   3  -6 1062.42   46.49
   3  -3  -6 1073.97   46.51
  -3   3   6 1072.33   46.55
   3  -3  -5 3011.23  125.11
   3   3  -5 2945.14  124.61
  -3   3   5 2904.36  124.64
  -3   3   4 6389.33  270.51
   3  -3  -4 6395.77  270.20
   3  -3  -3   28.11    4.07
  -3   3   3   33.71    4.15
  -3  -3   2 2248.06   93.95
  -3   3   2 2369.11   94.66
  -3  -3   2 2161.43   93.92
  -3   3   1 2206.38   93.67
   3  -3  -1 2193.24   93.79
  -3  -3   1 2201.97   93.24
  -3  -3   0 3896.57  167.86
  -3   3   0 3940.04  168.15
   3  -3   0 3983.09  168.29
  -3  -3   0 4022.01  167.59
  -3  -3  -1  436.02   19.25
   3  -3   1  443.18   19.25
   3  -3   1  404.83   19.67
  -3   3  -2 1582.70   66.82
   3  -3   2 1615.16   67.20
  -3  -3  -2 1499.60   67.41
  -3   3  -3   15.18    2.99
  -3   3  -3   19.11    3.30
   3  -3   3   18.44    3.14
  -3  -3  -3   16.70    4.08
  -3   3  -3   17.33    3.41
  -3   3  -4  660.19   28.21
   3  -3   4  688.10   29.45
   3  -3   4  663.70   29.46
  -3   3  -4  649.29   28.16
  -3   3  -4  646.92   29.36
  -3  -3  -4  633.27   29.20
  -3   3  -4  628.99   28.27
   3  -3   4  647.99   28.44
  -3  -3  -4  631.73   28.26
  -3   3  -5   97.24    6.07
   3  -3   5   88.18    5.56
  -3  -3  -5   92.09    7.37
  -3   3  -5   91.73    7.19
   3  -3   5   95.71    7.40
   3  -3   5   90.99    6.90
  -3   3  -5   92.36    6.29
  -3  -3  -5   98.30    6.61
  -3  -3  -6  731.47   32.30
  -3  -3  -7    9.81    6.62
  -3  -3  -8  523.21   24.40
  -3   3  -9   -0.87    6.51
  -3  -3  -9    8.98    8.01
  -3   3  -9    0.70    6.63
  -3   3 -10  269.85   14.09
  -3   3 -10  280.93   14.29
  -3  -3 -10  263.80   14.81
  -3   3 -11  127.63    8.84
  -3   3 -11  126.46    8.87
  -3  -3 -11  131.83    9.89
  -3   3 -12   29.60    5.97
  -3   3 -12   18.17    5.64
  -3  -3 -12   17.31    6.70
  -3   3 -13  100.66    6.79
  -3   3 -13   97.86    6.82
  -3  -3 -13  109.48    7.60
  -3  -3 -14    9.35    3.94
  -3   3 -14    4.64    3.23
   3   3  14    7.45    3.95
  -3   3 -14    6.14    3.31
  -3  -3 -15   35.02    3.07
   3   3  15   30.59    3.01
   3   4 -17   10.23    2.93
   3  -4 -16   25.60    3.96
   3   4 -16   23.94    4.37
   3   4 -16   34.23    4.49
   3   4 -15   42.65    6.03
   3   4 -15   44.01    5.63
   3   4 -14   76.40    7.96
   3  -4 -14   74.88    6.03
   3   4 -14   72.58    7.14
   3  -4 -14   60.07    7.36
   3   4 -13  225.94   14.21
   3  -4 -13  222.75   11.63
   3   4 -13  228.91   12.29
   3  -4 -13  209.27   12.62
  -3   4  12   91.00    8.09
   3   4 -12   83.15   11.54
   3  -4 -12   81.68    6.07
   3  -4 -12   82.30    8.82
   3  -4 -12   79.74    7.17
   3   4 -12   93.21    7.88
   3  -4 -11  178.28    9.61
   3  -4 -11  168.23   11.93
   3  -4 -11  184.31   10.59
   3   4 -11  186.26   10.92
  -3   4  11  199.94   11.29
   3  -4 -10  315.97   15.83
   3   4 -10  297.49   15.76
   3  -4 -10  291.19   15.05
  -3   4  10  315.81   16.24
   3   4  -9  219.70   10.49
   3  -4  -9  203.31    9.74
   3  -4  -9  215.39   10.64
   3  -4  -8  482.25   21.38
   3   4  -8  462.13   23.27
  -3   4   8  503.35   23.19
   3  -4  -8  481.68   21.85
   3   4  -8  490.36   21.74
   3   4  -7 1494.20   60.32
   3  -4  -7 1401.05   60.52
   3  -4  -7 1370.49   59.46
   3   4  -7 1411.44   59.66
   3   4  -7 1356.87   59.69
  -3   4   7 1389.95   60.10
   3  -4  -7 1386.28   59.70
   3   4  -7 1389.44   59.60
   3   4  -6  123.05    6.49
   3  -4  -6  118.34    7.77
   3   4  -6  122.19    6.98
   3   4  -6  122.79    6.79
  -3   4   6  129.32    7.82
   3   4  -6  113.51    6.66
   3  -4  -6  125.20    6.85
   3  -4  -5 4289.57  175.93
   3   4  -5 4103.83  175.19
   3   4  -5 4264.73  175.19
  -3   4   5 4114.16  175.34
  -3   4   5 3824.88  176.24
   3  -4  -4  225.97   11.45
   3   4  -4  222.82   10.40
  -3   4   4  228.19   11.52
  -3   4   4  222.79   10.63
   3   4  -3 5739.14  199.28
  -3   4   3 5681.10  200.14
  -3   4   3 5589.26  199.31
  -3  -4   2    9.28    2.40
  -3   4   2   10.83    2.84
  -3   4   2    6.32    3.15
   3  -4  -1 3019.60  130.42
  -3   4   1 3015.05  130.33
  -3   4   1 3026.94  129.72
  -3  -4   1 3179.87  129.90
   3  -4   0  472.00   23.11
  -3   4   0  489.85   22.25
   3   4   1 1030.15   45.01
   3  -4   1 1075.06   45.60
  -3   4  -1 1056.56   44.85
  -3   4  -2   83.68    4.82
   3   4   2   74.93    5.07
  -3   4  -2   80.19    6.30
   3  -4   2   73.64    6.26
   3  -4   2   80.53    5.52
  -3   4  -2   78.68    4.88
  -3   4  -3  871.80   37.92
  -3   4  -3  854.09   36.77
  -3   4  -3  866.89   36.73
   3  -4   3  869.89   37.99
   3   4   3  825.59   36.86
  -3  -4  -3  819.66   37.68
   3  -4   3  864.33   37.30
  -3  -4  -4  206.18   11.71
  -3   4  -4  217.00   10.48
  -3   4  -4  219.57   10.43
   3  -4   4  204.10   11.75
   3   4   4  201.28   11.07
   3  -4   4  223.56   12.02
   3  -4   4  223.50   10.84
  -3   4  -5    8.60    4.41
  -3  -4  -5    5.43    5.09
  -3   4  -5    3.53    4.28
   3  -4   5    7.09    3.27
  -3  -4  -6   15.79    6.32
  -3   4  -6   23.88    5.27
  -3   4  -6   18.62    5.12
  -3  -4  -7   46.00    7.87
  -3   4  -7   44.71    6.32
  -3   4  -7   48.36    6.29
  -3  -4  -8   48.85    8.18
  -3   4  -8   44.47    6.94
  -3   4  -8   52.06    7.07
  -3   4  -9  162.01   10.14
  -3  -4  -9  150.39   11.04
  -3  -4 -10   82.38    8.44
  -3   4 -10   72.67    7.37
  -3  -4 -11  177.16   11.11
  -3   4 -11  168.71   10.26
  -3   4 -12  765.06   33.77
  -3  -4 -12  764.93   34.03
  -3  -4 -13   11.85    4.92
  -3   4 -13   14.88    4.28
  -3   4 -13   14.44    4.41
   3   4  13    6.49    4.78
  -3   4 -14   79.47    4.92
   3   4  14   70.58    5.06
  -3  -4 -14   76.80    5.06
   3   5 -16  104.13    5.71
   3  -5 -16   79.96    5.37
   3   5 -15  173.48    9.47
   3   5 -15  177.56    9.09
   3  -5 -14   10.83    6.17
   3   5 -14    6.70    6.38
   3  -5 -14    3.03    3.83
   3   5 -14    6.22    5.23
   3  -5 -13   53.36    7.64
   3   5 -13   47.24    8.76
   3  -5 -13   41.21    5.07
   3   5 -13   42.61    6.38
   3  -5 -12   63.57    8.42
   3   5 -12   50.48   10.40
   3   5 -12   56.25    6.61
   3  -5 -12   56.70    5.79
   3   5 -11    6.99   10.85
   3  -5 -11    6.14    5.41
   3   5 -11    2.16    5.82
   3   5 -10  266.04   13.31
   3   5 -10  289.29   17.45
   3  -5 -10  238.47   13.25
   3   5  -9  193.68   10.03
  -3   5   9  180.65   13.15
   3  -5  -9  176.10    9.92
   3   5  -8  186.47   11.89
   3   5  -8  183.09    9.92
  -3   5   8  195.49   12.82
   3  -5  -8  189.87   10.30
   3   5  -7 1813.53   75.07
   3   5  -7 1736.87   74.47
  -3   5   7 1744.28   75.07
   3   5  -7 1741.54   74.37
   3  -5  -7 1734.66   74.58
  -3   5   7 1716.21   74.66
   3   5  -6  845.94   35.60
   3   5  -6  829.73   35.32
  -3   5   6  796.26   35.87
   3   5  -6  795.58   35.15
   3  -5  -6  813.12   35.49
  -3   5   6  813.71   35.53
  -3   5   5    2.80    4.05
   3   5  -5    1.85    3.11
   3  -5  -5    4.82    4.79
  -3   5   5    0.13    4.69
  -3   5   4   29.53    4.01
   3  -5  -4   30.71    5.11
   3   5  -4   23.39    3.28
  -3   5   4   24.52    4.37
  -3   5   4   25.19    4.41
   3   5  -3  212.58    9.24
  -3   5   3  204.77    9.62
   3   5  -3  203.22    9.15
  -3   5   3  201.53    9.51
  -3   5   2  508.58   23.27
   3  -5  -2  531.34   24.26
   3   5  -2  542.94   23.14
   3   5  -2  533.27   23.16
  -3   5   2  536.99   23.29
  -3  -5   2  531.99   23.67
  -3  -5   1    6.51    2.93
  -3  -5   1    4.33    2.76
   3   5  -1    4.00    2.69
   3   5  -1    5.37    2.62
  -3   5   1    2.41    2.96
  -3   5   1    3.78    3.15
  -3   5   0  744.71   32.28
   3   5   0  760.08   32.20
   3   5   0  750.01   32.07
  -3   5   0  716.11   32.19
  -3  -5   0  759.00   32.50
   3  -5   1  463.12   20.62
   3  -5   1  457.22   20.99
  -3   5  -1  423.25   19.45
   3   5   1  465.45   19.71
  -3   5  -1  436.41   19.68
   3   5   1  433.34   19.40
   3   5   1  453.78   19.66
  -3   5  -1  459.65   20.87
   3  -5   2 1246.17   53.75
   3   5   2 1208.90   52.53
  -3   5  -2 1245.28   52.31
   3  -5   2 1208.90   53.29
  -3   5  -2 1250.26   53.56
   3   5   2 1199.02   52.44
  -3   5  -3  268.57   12.46
   3  -5   3  269.02   13.36
   3   5   3  262.78   12.99
   3   5   3  267.52   12.80
   3  -5   3  260.64   13.94
  -3   5  -4  200.51   10.25
  -3   5  -4  201.42   10.02
   3   5   4  200.85   10.62
   3   5   4  194.65   10.98
   3  -5   4  188.10   10.47
  -3   5  -5  450.90   20.82
  -3  -5  -5  463.50   21.11
  -3   5  -5  454.65   20.64
   3   5   5  451.66   21.49
  -3  -5  -6   -3.48    6.75
  -3   5  -6   -0.08    5.63
  -3   5  -6    2.43    5.17
  -3  -5  -7   51.54    8.10
  -3   5  -7   59.05    6.74
  -3   5  -7   50.04    6.96
  -3  -5  -8   45.60    8.42
  -3   5  -8   52.37    7.25
  -3   5  -8   39.96    6.83
  -3   5  -9   68.09    7.54
  -3  -5  -9   61.57    8.16
  -3   5  -9   81.07    7.32
  -3  -5 -10   22.32    7.20
  -3   5 -10   32.98    6.31
  -3   5 -10   20.34    6.08
  -3   5 -11  556.16   25.63
  -3   5 -11  577.38   25.59
  -3  -5 -11  559.42   25.94
  -3   5 -12    5.95    4.64
  -3   5 -12    1.10    4.67
   3   5  12    4.14    5.02
  -3  -5 -12    2.50    5.44
   3   5  13  558.20   25.17
  -3  -5 -13  578.29   25.19
   3   5  14   55.68    3.89
  -3  -5 -14   80.20    4.35
   3   6 -16  150.11    7.30
   3  -6 -15   -2.99    4.21
   3   6 -15    4.66    3.72
   3   6 -14  204.40   10.37
   3  -6 -14  188.86   10.93
   3  -6 -13   -4.42    6.93
   3   6 -13    2.39    7.76
   3   6 -13    4.67    5.09
   3  -6 -13    3.82    3.79
   3  -6 -12   83.77    8.82
  -3   6  12   72.36    7.84
   3  -6 -12   76.55    6.00
   3   6 -12   84.22    6.80
   3   6 -12   76.06   10.81
  -3   6  11   24.74    6.82
   3   6 -11   34.59    5.64
   3  -6 -11   23.71    4.90
  -3   6  10   29.78    7.17
   3  -6 -10   30.50    5.66
   3   6 -10   22.27    5.53
  -3   6   9  853.28   36.67
   3   6  -9  767.95   34.69
   3  -6  -9  816.73   34.76
  -3   6   9  840.27   35.28
   3   6  -8  406.95   19.99
  -3   6   8  391.99   20.58
  -3   6   8  391.80   18.76
   3   6  -8  378.81   17.98
   3  -6  -8  395.85   18.35
  -3   6   7  117.11    8.26
  -3   6   7  118.41   10.15
   3   6  -7  111.68    6.69
   3  -6  -7  104.74    7.71
  -3   6   6   60.62    6.22
   3   6  -6   61.59    5.11
   3  -6  -6   66.52    6.05
  -3   6   6   61.71    8.43
   3   6  -5   93.01    5.68
  -3   6   5   89.33    7.55
  -3   6   5   87.41    6.61
  -3   6   4    5.32    4.30
   3   6  -4    2.12    3.04
  -3   6   4    7.68    5.11
   3   6  -4    6.82    3.59
  -3   6   3   46.72    4.62
   3   6  -3   40.40    3.64
  -3   6   3   40.61    5.04
   3   6  -3   41.40    4.11
  -3  -6   3   38.79    4.13
  -3   6   2   34.28    4.31
   3   6  -2   32.21    3.35
  -3   6   2   32.48    4.48
   3   6  -2   33.78    3.70
  -3  -6   2   26.11    3.88
  -3   6   1   19.79    3.89
   3   6  -1   15.31    2.98
  -3  -6   1   16.16    3.59
   3   6  -1   18.92    3.54
  -3   6   1   14.61    3.89
  -3  -6   1   19.03    3.71
  -3  -6   0    8.86    3.60
   3   6   0    9.99    3.05
   3   6   0   13.76    3.61
  -3   6   0    7.73    3.87
  -3   6   0    9.26    3.81
   3   6   1  749.64   32.30
  -3  -6  -1  746.00   33.13
   3   6   1  738.70   32.37
  -3   6  -1  738.06   32.43
  -3   6  -1  746.38   32.45
  -3   6  -2   80.12    6.06
  -3   6  -2   92.48    5.51
   3   6   2   93.32    6.59
   3   6   2   89.21    5.86
   3   6   3   56.47    5.48
   3   6   3   58.20    6.66
  -3   6  -3   51.39    4.88
   3   6   4  173.97   10.45
   3   6   4  182.56   11.23
  -3   6  -4  194.43    9.76
  -3   6  -5   32.22    5.51
   3   6   5   40.06    7.02
   3   6   5   38.64    8.06
  -3  -6  -6  278.57   14.80
  -3   6  -6  276.29   14.34
  -3   6  -6  266.08   13.87
   3   6   6  284.65   15.73
   3   6   6  288.40   15.33
  -3  -6  -7   12.60    7.70
  -3   6  -7   24.40    6.77
  -3   6  -7   17.19    5.98
   3   6   7    5.95    8.56
  -3   6  -8  146.39    9.82
  -3  -6  -8  149.68   10.34
   3   6   8  138.00   11.69
  -3   6  -8  156.99    9.28
  -3   6  -9  149.51    9.43
  -3   6  -9  139.93    8.95
   3   6   9  133.92   11.05
  -3  -6  -9  131.40    9.81
  -3   6 -10  332.94   15.59
   3   6  10  297.97   16.52
  -3  -6 -10  319.30   16.04
  -3  -6 -11    3.21    5.53
  -3   6 -11    4.22    4.86
   3   6  11   -2.22    5.34
  -3   6 -12   82.20    5.67
   3   6  12   68.44    5.61
  -3  -6 -12   75.56    6.17
  -3   6 -13   62.17    3.85
  -3  -6 -13   69.90    4.60
   3  -7 -15  250.01   11.10
   3   7 -15  255.16   10.83
   3  -7 -14    8.79    5.15
   3   7 -14    4.32    3.43
   3   7 -13  186.32   10.00
   3  -7 -13  209.53   11.49
   3  -7 -12    0.61    7.45
   3   7 -12    4.15    4.50
   3   7 -11  135.77    8.10
   3  -7 -11  122.84    7.62
  -3   7  10   57.86    7.27
   3   7 -10   68.36    5.68
   3  -7 -10   65.31    5.59
   3   7  -9   79.28    6.03
  -3   7   9   83.83   11.53
   3  -7  -9   85.68    6.48
  -3   7   9   77.94    8.09
   3  -7  -8   44.32    6.04
  -3   7   8   41.57    7.17
  -3   7   7   -0.17    6.25
   3  -7  -7    0.92    5.58
  -3   7   7   -8.24    9.68
   3  -7  -6    4.32    5.43
  -3   7   6   -0.50    5.80
  -3   7   6    3.23    7.93
   3   7  -5   85.23    6.67
  -3   7   5   93.61    8.54
  -3   7   5   82.77    7.09
  -3   7   4  140.95    9.68
   3   7  -4  149.65    8.41
  -3   7   4  147.01    8.85
  -3   7   3    7.79    5.01
  -3   7   3    8.32    5.71
   3   7  -3    4.22    4.41
  -3   7   2   -0.83    4.50
  -3   7   2   -7.03    5.36
   3   7  -2    6.76    4.47
  -3   7   1   52.48    5.42
   3   7  -1   59.80    5.28
  -3   7   1   54.12    5.78
  -3   7   0    7.82    4.41
   3   7   0    8.93    4.54
  -3   7   0    5.38    5.13
   3   7   1  403.96   18.71
  -3   7  -1  413.00   18.81
  -3   7  -1  398.62   18.64
   3   7   2   46.28    6.32
  -3   7  -2   36.68    5.68
  -3   7  -2   36.79    5.27
  -3   7  -3  244.83   12.26
   3   7   3  226.91   11.99
   3   7   3  252.99   13.21
  -3   7  -3  248.83   12.61
  -3   7  -4    9.90    5.35
  -3   7  -4   13.60    4.72
   3   7   4   13.63    5.33
   3   7   4   18.20    7.77
  -3   7  -5   84.31    7.16
   3   7   5   77.75    8.01
  -3   7  -5   92.05    6.73
   3   7   5   85.72    9.88
  -3   7  -6  183.49    9.41
   3   7   6  165.55   11.62
  -3   7  -6  161.24    9.71
  -3  -7  -6  170.44   10.78
  -3   7  -7  509.89   21.20
  -3  -7  -7  529.31   21.97
  -3  -7  -8   58.06    7.32
  -3   7  -8   65.63    6.08
  -3   7  -9  439.07   20.14
  -3   7  -9  467.67   20.09
  -3  -7  -9  468.54   20.66
  -3  -7 -10    1.48    5.70
  -3   7 -10    1.11    4.53
   3   7  10   -3.04    5.52
  -3   7 -10    4.02    4.44
  -3   7 -11  191.60    9.57
  -3  -7 -11  192.01   10.12
  -3   7 -11  179.15    9.40
  -3  -7 -12    6.94    3.64
  -3   7 -12    2.76    2.57
   3  -8 -14  168.43    8.88
   3   8 -14  175.35    8.55
   3   8 -13  174.33   10.00
   3  -8 -13  181.43   10.11
   3  -8 -12   69.64    7.75
  -3   8  11  165.16    9.74
  -3   8  10  108.33    8.10
  -3   8   9  512.52   23.03
  -3   8   9  488.75   21.04
  -3   8   8    7.88    6.18
   3  -8  -8   -3.47    4.61
  -3   8   8    3.79    9.64
   3   8  -8   -5.02    7.64
  -3   8   7   17.53    6.46
   3  -8  -7    6.31    5.11
  -3   8   7   28.54    9.99
   3   8  -7   19.91    6.90
  -3   8   6   19.59    6.12
   3  -8  -6   23.43    5.55
  -3   8   6   29.41    9.54
   3   8  -6   20.03    6.41
  -3   8   5  165.12   10.08
  -3   8   5  158.91   11.84
   3   8  -5  162.39    9.85
  -3   8   4   -0.09    7.73
  -3   8   4   -0.34    5.67
   3   8  -4    2.82    5.43
  -3   8   3  110.90    8.95
   3   8  -3  109.64    7.69
  -3   8   3  111.76    7.92
  -3   8   2   14.61    5.55
   3   8  -2    9.82    5.50
  -3   8   2   11.78    6.82
   3   8  -1  448.00   20.29
  -3   8   1  417.80   20.49
  -3   8   1  438.62   20.16
  -3   8   0   59.94    6.04
   3   8   0   75.78    6.73
  -3   8   0   71.18    7.28
   3   8   1  371.24   17.67
  -3   8  -1  358.74   17.69
  -3   8  -1  365.84   17.27
  -3   8  -2  110.08    7.76
   3   8   2  108.84    9.07
  -3   8  -2  116.22    8.53
   3   8   3  283.50   15.02
  -3   8  -3  284.53   14.43
  -3   8  -3  267.12   13.93
  -3   8  -4  145.01    9.10
   3   8   4  154.66   10.86
  -3   8  -4  148.55    9.83
  -3   8  -5  125.32    8.50
   3   8   5  131.06   10.31
  -3   8  -5  125.22    9.03
  -3   8  -6  270.92   13.79
  -3  -8  -6  273.39   14.19
   3   8   6  267.52   14.71
  -3   8  -7  129.89    8.82
  -3  -8  -7  154.27    9.51
  -3   8  -8  132.10    8.39
  -3  -8  -8  134.88    9.19
  -3   8  -9   82.92    6.50
  -3  -8  -9   98.10    7.53
  -3   8 -10   87.24    5.85
  -3   8 -10  101.21    6.62
  -3  -8 -10   95.35    6.83
  -3   8 -11   12.26    3.71
  -3  -8 -11    8.47    3.74
  -3   8 -12    9.16    2.50
   3   9 -13   82.17    5.30
   3  -9 -13   88.17    6.05
   3  -9 -12  155.77    9.42
   3   9 -12  165.03    9.59
   3   9 -11   46.67    7.75
   3   9 -10  144.64   13.92
  -3   9  10  267.30   11.93
  -3   9   9  205.49   13.17
  -3   9   9  209.63   10.68
  -3   9   8  100.38    7.80
  -3   9   8  119.13   11.07
  -3   9   7  406.82   18.81
   3   9  -7  353.92   17.76
  -3   9   7  372.38   16.80
  -3   9   6  214.77   13.02
   3   9  -6  188.23   11.32
   3  -9  -6  174.63   10.01
  -3   9   6  196.00   10.82
  -3   9   5   35.05    6.08
   3  -9  -5   32.48    5.40
  -3   9   5   34.75    8.80
   3   9  -5   32.62    6.59
  -3   9   4  277.60   14.80
   3   9  -4  258.18   13.57
  -3   9   4  249.27   13.41
  -3   9   3    0.62    5.69
  -3   9   3    0.91    7.67
   3   9  -3   -0.09    6.01
  -3   9   2  368.03   18.35
  -3   9   2  410.53   19.38
   3   9  -2  392.16   18.73
  -3   9   1   17.37    5.60
   3   9  -1   18.82    6.48
  -3   9   1   26.70    7.44
   3   9   0  352.52   17.40
  -3   9   0  357.29   17.52
  -3   9   0  345.14   16.80
  -3   9  -1   51.26    6.20
   3   9   1   46.76    7.39
  -3   9  -1   52.54    7.83
  -3   9  -2  825.07   38.54
   3   9   2  885.57   39.08
  -3   9  -2  940.06   39.00
  -3   9  -3   15.94    5.21
   3   9   3   13.36    7.17
  -3   9  -3   16.38    6.68
   3   9   4  279.01   14.70
  -3   9  -4  281.48   14.01
  -3   9  -4  243.52   13.49
  -3   9  -5    1.56    5.13
  -3  -9  -5   -5.24    5.79
   3   9   5    1.88    7.51
  -3   9  -5    3.06    6.05
  -3   9  -6  111.30    8.21
  -3  -9  -6   95.27    7.94
  -3   9  -6   91.14    7.43
  -3  -9  -7    5.43    5.74
  -3   9  -7    8.31    4.87
  -3   9  -7    4.63    5.72
  -3   9  -8  108.08    7.50
  -3  -9  -8   97.85    7.47
  -3  -9  -9   31.39    4.87
  -3   9  -9   34.17    4.92
  -3   9 -10   92.12    5.71
  -3  -9 -10   84.24    5.61
  -3   9 -11   46.55    3.44
   3 -10 -12   39.55    4.65
   3 -10 -11   21.78    5.35
   3  10 -11   23.32    5.30
   3  10 -10    3.36    6.38
  -3  10   9  200.97   11.80
  -3  10   9  182.70    9.49
  -3  10   8   54.59    5.84
  -3  10   8   72.68    9.52
   3  10  -8   54.05    8.55
  -3  10   7  443.76   21.47
   3  10  -7  414.40   21.02
  -3  10   7  418.89   19.71
  -3  10   6   54.97    6.02
  -3  10   6   69.53    9.50
   3  10  -6   58.57    7.44
   3  10  -5  395.72   17.78
  -3  10   5  363.22   17.14
  -3  10   4  257.07   13.79
  -3  10   4  236.74   12.01
   3  10  -4  251.99   12.66
  -3  10   3  216.45   12.35
   3  10  -3  243.92   12.92
  -3  10   2   46.44    5.74
  -3  10   2   45.67    7.85
   3  10  -2   47.64    6.56
   3  10  -1  164.32    9.93
  -3  10   1  165.40   10.40
  -3  10   0    2.06    4.73
  -3  10   0   -3.85    7.01
   3  10   0   -1.93    6.35
  -3  10  -1  407.96   20.59
   3  10   1  466.99   21.34
  -3  10  -1  474.70   21.31
  -3  10  -2    2.76    4.89
  -3  10  -2    0.61    6.48
   3  10   2    0.42    6.93
   3  10   3  766.05   33.73
  -3  10  -3  794.51   33.47
  -3  10  -3  686.46   33.17
  -3 -10  -4   71.56    6.51
  -3  10  -4   55.75    6.50
   3  10   4   66.77    8.49
  -3 -10  -5  120.36    8.43
   3  10   5  134.17    9.86
  -3 -10  -6   15.77    5.11
  -3  10  -6    9.96    5.69
  -3  10  -7  300.33   12.99
  -3 -10  -7  222.91   12.44
  -3 -10  -8    3.57    3.58
  -3  10  -8    2.95    4.19
  -3  10  -9  200.91    9.85
  -3  10 -10   -1.90    2.36
   3 -11 -11    7.57    3.63
   3 -11 -10  114.22    7.23
   3  11  -9   24.22    5.96
   3  11  -8   92.81    8.88
  -3  11   8   99.32    6.19
  -3  11   7    2.92    3.72
   3  11  -7    2.45    6.68
  -3  11   7   16.84    7.67
   3  11  -6   91.64    8.23
  -3  11   6   99.80    9.32
  -3  11   5    1.14    4.37
   3  11  -5   -3.10    6.34
  -3  11   5   -1.57    8.13
  -3  11   4   37.29    8.12
  -3  11   4   27.95    4.82
   3  11  -4   31.42    6.35
  -3  11   3    0.66    4.44
   3  11  -3    4.50    5.94
  -3  11   3    7.33    7.38
  -3  11   2    6.63    4.59
   3  11  -2   13.11    5.86
  -3  11   2   20.41    7.50
  -3  11   1   34.39    5.28
  -3  11   1   55.24    7.80
   3  11  -1   40.87    6.69
   3  11   0  149.14   10.41
  -3  11   0  182.20   10.95
   3  11   1   68.10    7.83
  -3  11  -1   64.70    7.67
   3  11   2  215.10   12.82
  -3  11  -2  234.05   12.50
  -3  11  -3    3.08    6.07
   3  11   3    3.70    6.77
   3  11   4  123.20    9.24
  -3  11  -4  151.13    9.05
  -3  11  -5   32.88    5.72
  -3  11  -6   17.81    4.67
  -3  11  -7   97.47    6.23
  -3  11  -8   24.89    3.45
  -3  12   7   20.14    5.99
  -3  12   6    4.47    6.43
   3  12  -6    0.65    5.85
  -3  12   5    9.02    6.64
   3  12  -5    8.21    5.82
  -3  12   4   23.21    6.88
   3  12  -4   23.16    5.96
  -3  12   3    6.61    6.67
   3  12  -3   16.53    5.71
   3  12  -2   17.50    5.77
  -3  12   2   26.54    6.90
   3  12  -1   -1.94    5.62
  -3  12   1   -0.09    5.85
   3  12   0   13.67    5.77
  -3  12   0   11.70    6.13
   3  12   1    9.66    5.70
  -3  12  -1   11.10    5.84
   3  12   2    0.91    5.52
  -3  12  -2    6.32    5.47
  -3  12  -3   11.33    5.03
  -3  12  -4   12.43    4.63
  -3  12  -5   43.72    4.80
  -3  12  -6  115.00    6.44
  -3  13   6   25.21    4.35
  -3  13   5   -4.46    4.71
  -3  13   4   14.29    5.08
  -3  13   3   -1.32    5.11
  -3  13   2    7.61    5.09
  -3  13   1   11.38    5.01
  -3  13   0   -3.92    4.66
  -3  13  -1    5.33    4.21
  -3  13  -2    9.63    4.09
  -3  13  -3    0.10    3.43
  -3  13  -4    1.30    2.66
   4   0 -17    0.05    3.37
   4   0 -17   -0.98    3.45
   4   0 -16   93.60    6.76
   4   0 -15    2.31    5.65
   4   0 -14  478.08   22.49
   4   0 -14  481.55   22.31
   4   0 -13    3.19    6.49
   4   0 -13   -2.50    6.76
   4   0 -12   17.44    6.87
   4   0 -11    1.49    6.25
  -4   0  10   34.18    5.01
   4   0 -10   32.75    5.97
  -4   0   9   -0.60    4.04
   4   0  -9    0.42    4.81
   4   0  -9   -1.96    4.62
   4   0  -8  184.07    9.73
   4   0  -8  188.16   10.68
  -4   0   8  194.75    9.29
  -4   0   7   -1.88    2.79
   4   0  -7    0.39    3.65
   4   0  -7    0.20    2.00
   4   0  -7   -2.05    3.23
   4   0  -7   -0.56    3.06
   4   0  -7    4.14    3.93
   4   0  -6  850.72   37.55
   4   0  -6  877.56   37.64
   4   0  -6  917.34   38.41
   4   0  -5    1.14    1.92
   4   0  -5    0.40    3.15
   4   0  -4 1083.50   46.28
   4   0  -3    1.68    3.02
   4   0  -2  344.72   14.81
  -4   0   2  301.72   14.04
   4   0  -1   -0.62    3.98
  -4   0   1   -2.55    2.62
  -4   0   1    0.89    1.65
  -4   0   0 3006.53  129.23
   4   0   0 3107.27  129.66
  -4   0  -1    1.13    3.37
   4   0   1   -1.20    4.06
   4   0   1    1.97    2.68
   4   0   2  792.23   35.12
  -4   0  -2  822.93   35.47
  -4   0  -3    1.48    3.01
  -4   0  -3    3.80    2.80
  -4   0  -3    2.35    4.15
   4   0   3   -0.34    3.05
  -4   0  -4  547.32   24.86
   4   0   4  521.75   24.23
  -4   0  -4  549.09   23.47
  -4   0  -4  525.23   23.61
  -4   0  -5    0.68    4.22
  -4   0  -5    0.68    3.52
   4   0   5   -1.76    3.72
  -4   0  -6  703.07   31.15
  -4   0  -6  728.53   31.54
  -4   0  -7   -1.22    6.14
  -4   0  -7    1.37    4.60
  -4   0  -8   96.03    7.02
  -4   0  -8   87.47    8.42
  -4   0  -9    5.30    7.02
  -4   0  -9    7.48    5.08
  -4   0 -10  882.46   38.40
  -4   0 -10  873.01   38.93
  -4   0 -11   -7.36    6.54
  -4   0 -11   -0.07    4.45
  -4   0 -12  517.22   23.98
  -4   0 -12  506.95   23.78
  -4   0 -13   -0.80    4.49
  -4   0 -13    0.62    3.27
   4   0  14  123.46    6.75
   4   1 -18   56.94    3.67
   4   1 -17   39.13    3.98
   4  -1 -17   38.03    3.83
   4   1 -17   42.75    4.36
   4   1 -16  333.01   16.58
   4   1 -16  383.94   16.74
   4  -1 -16  346.00   16.38
   4  -1 -15  150.96    9.43
   4   1 -15  157.77    9.50
   4  -1 -15  139.71    8.90
   4   1 -14   39.91    6.83
   4  -1 -14   29.31    6.04
   4  -1 -14   25.21    6.58
   4   1 -13   36.57    7.21
   4  -1 -13   40.09    6.59
   4  -1 -13   38.18    7.00
   4  -1 -12   26.61    6.28
   4  -1 -12   15.52    6.64
   4  -1 -12   23.82    7.15
   4   1 -11  119.02    8.79
   4  -1 -11  120.13    8.74
  -4   1  11  108.23    7.89
   4  -1 -11  100.65    8.13
   4  -1 -11  115.79    8.32
  -4   1  10   44.79    5.53
   4  -1 -10   48.16    6.04
   4   1 -10   48.76    6.43
   4   1  -9   53.97    5.68
  -4   1   9   51.23    5.16
   4  -1  -9   55.43    5.52
   4  -1  -8   62.45    5.10
   4   1  -8   54.06    5.08
   4   1  -8   56.77    5.06
   4   1  -8   54.04    5.30
   4   1  -8   53.60    5.72
   4  -1  -8   55.11    5.66
  -4   1   8   57.16    4.65
  -4   1   7    5.08    3.10
   4   1  -7    5.49    3.67
   4  -1  -7    4.28    3.87
   4  -1  -7    9.12    3.34
   4   1  -7    7.23    3.59
   4   1  -7    3.11    3.50
   4  -1  -7    6.59    2.78
   4   1  -7    5.82    4.04
   4  -1  -7    9.34    4.42
   4  -1  -6  772.26   32.29
   4   1  -6  739.05   32.22
   4   1  -6  752.38   32.11
   4   1  -6  743.85   32.30
   4  -1  -6  729.59   32.17
   4   1  -6  752.07   32.90
   4  -1  -6  751.23   32.37
   4  -1  -6  763.27   33.13
  -4   1   6  732.12   32.14
   4  -1  -5   20.18    3.20
   4   1  -5   17.31    2.91
   4   1  -5   21.44    3.61
   4  -1  -4  226.17   10.96
   4   1  -4  249.81   11.23
   4   1  -3   19.81    2.91
   4  -1  -3   20.78    3.15
  -4   1   2  424.42   19.02
   4  -1  -2  436.79   19.41
  -4   1   2  435.11   18.95
  -4  -1   1  457.61   19.73
   4  -1  -1  446.80   20.29
  -4   1   1  447.13   19.54
  -4   1   0   57.24    4.60
  -4  -1   0   59.62    4.52
   4  -1   0   55.23    5.22
   4   1   0   63.07    3.73
  -4  -1  -1  835.09   33.36
  -4   1  -1  779.43   33.41
   4  -1   1  754.72   33.63
   4   1   1  715.66   32.69
   4  -1   2  472.55   20.95
  -4   1  -2  450.31   20.14
  -4   1  -2  477.90   21.18
  -4  -1  -2  493.09   21.11
   4   1   2  442.26   20.41
   4  -1   2  458.65   21.35
  -4  -1  -3 2467.08  104.24
  -4   1  -3 2530.74  105.39
  -4  -1  -3 2456.06  105.26
   4  -1   3 2537.05  105.57
  -4   1  -3 2452.30  104.32
   4   1   3 2411.28  104.82
  -4   1  -3 2441.07  104.33
  -4  -1  -3 2393.43  104.29
   4  -1   3 2631.24  105.24
  -4  -1  -4   79.10    4.69
  -4   1  -4   70.07    5.06
  -4   1  -4   80.57    6.33
  -4  -1  -4   75.79    6.33
   4  -1   4   80.61    5.91
   4   1   4   63.75    5.36
  -4   1  -4   74.85    5.32
  -4  -1  -4   77.51    5.29
  -4  -1  -5 2790.09  118.00
  -4   1  -5 2818.15  118.11
  -4  -1  -5 2781.39  118.20
   4  -1   5 2729.11  119.13
   4   1   5 2677.41  118.95
  -4   1  -5 2834.44  118.25
  -4   1  -6   21.13    5.41
  -4  -1  -6   14.74    5.55
  -4  -1  -6   19.33    3.96
  -4   1  -6   14.38    4.63
  -4  -1  -7 1677.39   73.78
  -4   1  -7 1747.54   74.00
  -4  -1  -7 1760.87   74.28
  -4   1  -7 1751.85   74.24
  -4  -1  -8  471.05   22.15
  -4   1  -8  496.10   22.58
  -4  -1  -8  508.06   23.14
  -4   1  -8  508.66   23.03
  -4  -1  -9  202.95   12.05
  -4   1  -9  208.79   11.19
  -4  -1  -9  193.31   10.54
  -4   1  -9  215.19   12.12
  -4   1 -10   38.95    7.09
  -4  -1 -10   53.59    6.95
  -4  -1 -10   28.80    4.60
  -4   1 -10   46.84    5.85
   4   1  10   27.41    5.27
  -4   1 -11  658.44   29.34
  -4  -1 -11  605.86   28.94
  -4   1 -11  708.90   29.85
  -4   1 -11  664.77   29.34
  -4  -1 -11  715.05   29.89
  -4   1 -12   48.76    6.10
  -4  -1 -12   41.04    6.19
  -4   1 -12   38.11    4.90
  -4   1 -12   35.59    4.79
  -4   1 -13  287.71   13.72
  -4  -1 -13  284.09   13.61
   4  -1  14   -2.81    2.86
   4   1  14    4.30    3.25
   4   2 -18   -1.27    2.18
   4   2 -17   26.89    3.28
   4   2 -17   33.19    4.06
   4   2 -16   31.83    4.80
   4   2 -16   36.00    5.49
   4  -2 -16   27.12    3.94
   4   2 -15  142.39    9.24
   4  -2 -15  137.11    8.58
   4  -2 -14   96.97    7.65
   4  -2 -14   93.80    6.87
   4  -2 -14   77.19    6.81
   4   2 -13  503.87   22.99
   4  -2 -13  521.44   22.75
   4  -2 -13  496.70   22.26
   4  -2 -12   31.32    7.00
   4   2 -12   49.54    7.87
   4  -2 -12   42.78    6.35
   4  -2 -12   44.16    7.16
   4   2 -11  640.80   28.99
   4  -2 -11  671.31   28.79
   4   2 -11  638.96   29.17
   4  -2 -11  645.82   29.01
  -4   2  11  641.93   28.81
   4  -2 -11  609.47   28.95
   4  -2 -10   87.01    6.54
  -4   2  10   74.12    6.66
   4  -2 -10   74.99    7.25
   4   2 -10   71.43    7.30
   4   2 -10   78.17    7.11
   4  -2 -10   77.30    7.17
  -4   2   9  875.23   38.89
   4  -2  -9  913.13   38.87
   4   2  -9  912.57   38.95
   4   2  -9  886.99   39.12
   4  -2  -9  882.27   39.01
   4   2  -8   93.99    6.10
   4   2  -8   90.78    7.40
   4   2  -8   92.74    6.44
  -4   2   8   96.45    6.16
   4   2  -7   50.21    4.59
   4   2  -7   57.88    4.63
   4  -2  -7   50.72    5.58
   4  -2  -7   53.78    4.56
   4   2  -7   57.03    5.65
  -4   2   7   52.55    4.54
   4   2  -6  456.17   20.30
   4   2  -6  446.17   20.40
   4   2  -6  490.96   21.38
   4  -2  -6  462.46   21.46
   4  -2  -6  480.90   20.72
  -4   2   6  458.20   20.36
   4   2  -5 1601.97   68.81
   4   2  -5 1660.75   69.40
  -4   2   5 1614.08   68.82
   4  -2  -4   29.72    3.44
   4   2  -4   26.82    2.81
   4   2  -4   24.60    3.15
  -4   2   3 2202.90   89.23
   4  -2  -3 2294.10   89.29
   4   2  -3 1980.33   88.58
  -4   2   2   95.13    5.48
  -4   2   2   99.42    6.02
  -4  -2   2  100.48    4.74
   4  -2  -2  103.48    6.22
  -4   2   1  197.57    9.45
  -4  -2   1  187.33    8.91
   4  -2  -1  180.69    9.75
  -4  -2   0  573.23   24.68
   4  -2   0  544.46   25.17
   4   2   1  694.94   32.20
   4   2   1  776.53   32.60
  -4  -2  -1  808.34   32.89
   4  -2   1  792.04   33.38
   4   2   2  256.37   12.21
  -4   2  -2  262.64   12.58
  -4  -2  -2  259.75   12.39
   4  -2   2  254.91   12.95
   4   2   2  232.90   11.76
  -4   2  -2  249.12   11.52
  -4   2  -3  174.96    8.38
   4  -2   3  180.90   10.01
   4   2   3  169.86    9.95
  -4  -2  -3  165.72    9.34
  -4   2  -3  169.47    9.64
   4  -2   3  185.53    9.53
   4   2   3  167.37    8.97
   4  -2   3  162.75    8.11
  -4   2  -3  169.58    8.48
  -4  -2  -3  161.84    8.32
  -4   2  -4  836.64   35.65
  -4   2  -4  818.32   35.84
  -4   2  -4  845.00   35.78
  -4   2  -4  809.28   37.04
  -4  -2  -4  782.30   36.80
   4  -2   4  884.33   37.44
   4  -2   4  830.24   36.85
   4   2   4  824.30   36.66
  -4  -2  -4  814.73   35.78
  -4  -2  -5  102.87    5.74
  -4   2  -5   94.85    6.71
  -4   2  -5  102.89    6.63
  -4  -2  -5   96.11    6.75
  -4  -2  -6 1355.50   60.00
  -4  -2  -6 1395.43   60.47
  -4   2  -6 1450.46   60.36
  -4   2  -6 1444.12   60.51
  -4  -2  -7   37.86    6.67
  -4  -2  -7   28.78    4.18
  -4   2  -7   32.05    5.81
   4   2   7   28.07    8.08
  -4   2  -7   30.03    6.35
   4   2   8  251.68   13.94
  -4   2  -8  260.21   13.76
  -4  -2  -8  231.70   12.09
  -4   2  -8  267.26   13.30
  -4  -2  -8  270.81   13.95
  -4  -2  -9   73.58    8.26
  -4   2  -9   75.90    6.71
  -4   2  -9   73.13    7.34
  -4   2  -9   72.83    7.81
  -4  -2 -10   -3.39    6.55
  -4   2 -10    1.47    6.59
  -4   2 -10    0.09    5.60
  -4   2 -11   20.50    5.03
  -4   2 -11   22.23    5.48
  -4  -2 -11   26.35    6.13
  -4   2 -11   24.83    6.61
  -4  -2 -12  209.54   10.69
  -4   2 -12  185.51   10.06
  -4   2 -12  195.40   10.23
  -4   2 -13   49.14    4.09
   4  -2  13   40.63    4.05
   4  -2  14   53.05    3.75
  -4  -2 -14   84.61    4.50
   4   3 -17    2.79    2.45
   4   3 -16   46.79    4.74
   4   3 -15   40.68    5.73
   4  -3 -15   35.92    5.01
   4  -3 -15   44.01    4.55
   4   3 -15   44.99    6.26
   4  -3 -15   48.82    5.67
   4   3 -14  171.65   10.15
   4  -3 -14  172.21    9.47
   4   3 -14  176.20   10.12
   4  -3 -14  142.72    8.64
   4  -3 -14  130.99    9.22
   4   3 -13  181.78   11.57
   4  -3 -13  181.30   10.52
   4   3 -13  178.57   10.69
   4  -3 -13  154.59   10.27
   4  -3 -12 1251.62   53.17
   4   3 -12 1257.38   53.19
  -4   3  12 1251.65   53.13
   4  -3 -12 1196.91   52.81
   4  -3 -12 1153.89   53.15
   4  -3 -11   25.28    6.95
   4  -3 -11   24.46    7.50
  -4   3  11   23.73    6.27
   4   3 -11   27.60    6.69
   4  -3 -11   27.47    5.71
   4   3 -11   21.08    6.95
   4  -3 -10  842.31   36.52
   4   3 -10  848.33   36.81
   4   3 -10  842.20   36.99
   4  -3 -10  826.11   36.86
  -4   3  10  819.07   36.77
   4  -3  -9   13.58    4.62
   4  -3  -9    6.79    5.79
   4   3  -9    5.02    5.48
   4   3  -9   11.66    5.02
  -4   3   9   10.76    5.32
   4   3  -8  688.73   30.63
   4   3  -8  720.27   30.74
   4   3  -8  698.09   30.86
   4  -3  -8  716.33   30.86
   4  -3  -8  708.00   31.20
  -4   3   8  669.20   30.70
  -4   3   7   38.17    4.72
   4  -3  -7   40.55    4.96
   4   3  -7   37.94    4.53
  -4   3   7   40.53    6.10
   4  -3  -7   43.77    4.77
   4  -3  -7   44.00    5.43
   4   3  -7   39.94    4.20
   4   3  -7   38.81    4.47
   4   3  -6  885.18   37.68
   4   3  -6  893.41   37.78
  -4   3   6  891.11   38.04
   4   3  -6  828.95   37.73
   4  -3  -6  894.11   38.33
   4  -3  -6  878.64   37.87
  -4   3   6  866.10   37.79
   4   3  -5  534.54   22.56
   4   3  -5  518.89   22.69
   4   3  -5  492.72   22.59
  -4   3   5  522.11   23.57
  -4   3   5  515.27   22.66
   4   3  -4 4790.98  202.21
  -4   3   4 4941.20  202.96
  -4   3   4 4709.93  202.20
   4   3  -3   45.18    3.65
   4   3  -3   47.11    3.62
   4  -3  -3   47.71    4.30
  -4   3   3   50.17    4.33
  -4   3   3   51.88    3.72
   4   3  -2 2972.10  123.46
  -4   3   2 3098.62  123.97
   4   3  -2 2933.35  123.44
   4  -3  -2 2995.09  124.13
  -4  -3   2 2827.13  123.13
  -4   3   2 2901.31  123.79
  -4   3   2 2887.12  123.41
  -4   3   1  627.60   28.48
  -4   3   1  691.66   29.21
   4   3  -1  658.80   28.58
   4  -3  -1  658.37   29.35
  -4  -3   1  655.61   28.52
  -4  -3   1  676.94   28.28
   4   3   0 1062.07   47.70
   4   3   0 1125.22   47.73
  -4   3   0 1147.94   48.36
   4  -3   0 1155.21   48.71
  -4  -3   0 1125.28   47.93
  -4   3  -1   73.87    6.14
   4   3   1   79.28    5.16
   4   3   1   81.93    5.05
  -4  -3  -1   73.40    5.46
   4  -3   1   79.15    6.39
  -4   3  -1   75.47    4.75
   4   3   2 1438.99   61.04
  -4   3  -2 1426.06   60.65
   4   3   2 1404.07   60.83
   4  -3   2 1444.78   61.86
  -4  -3  -2 1402.51   61.37
   4   3   3   31.70    5.15
  -4   3  -3   38.90    3.61
  -4   3  -3   30.64    3.99
  -4  -3  -3   33.16    4.00
  -4  -3  -3   33.33    4.98
   4  -3   3   33.98    5.61
   4  -3   3   39.20    5.07
   4  -3   3   37.15    3.56
  -4   3  -4  630.32   24.53
  -4  -3  -4  619.17   24.69
  -4  -3  -4  595.60   25.91
  -4   3  -5  498.98   24.58
  -4   3  -5  497.82   24.84
  -4   3  -6  124.64    7.38
  -4   3  -6  122.54    8.17
  -4  -3  -6  124.93    8.21
  -4   3  -7  114.44    7.89
  -4   3  -7  108.27    8.26
  -4   3  -7  118.78    8.79
  -4  -3  -7  117.31    8.77
  -4   3  -8   13.57    7.15
  -4   3  -8    7.70    5.83
  -4   3  -8   11.38    6.58
  -4  -3  -8    5.71    7.19
  -4   3  -9  163.31    9.71
  -4  -3  -9  167.17   10.59
  -4   3  -9  164.87   10.31
  -4   3 -10  106.86    7.50
  -4  -3 -10  111.06    8.79
  -4   3 -10  110.26    8.44
  -4  -3 -11    5.56    5.72
  -4   3 -11    8.49    4.64
  -4   3 -11   -0.56    5.62
  -4   3 -12   -4.50    4.61
  -4  -3 -12    8.02    5.04
  -4   3 -12   -1.27    3.89
   4   3  12    3.11    5.13
  -4  -3 -13   14.90    3.96
   4   3  13   11.33    4.36
   4  -3  13    3.76    2.63
   4   3  14   23.15    3.05
  -4  -3 -14   21.18    2.87
   4   4 -17  127.47    6.66
   4   4 -16   69.71    5.08
   4   4 -16   85.41    5.69
   4   4 -15  123.71    7.74
   4  -4 -15  126.29    7.38
   4   4 -15  140.57    8.06
   4   4 -14   95.53    7.85
   4  -4 -14   76.54    7.26
   4  -4 -14   92.81    6.97
   4   4 -14   97.42    7.64
   4  -4 -13  166.03   10.55
   4   4 -13  174.58   11.42
   4  -4 -13  189.82   10.11
   4   4 -13  174.23   10.47
   4  -4 -13  154.22    9.00
  -4   4  12   10.27    6.15
   4  -4 -12   18.69    5.93
   4   4 -12   16.11    6.39
   4  -4 -12   17.37    7.06
   4   4 -12   11.35    8.53
   4  -4 -12   15.55    4.39
   4  -4 -11  982.44   43.34
   4   4 -11  912.65   44.75
  -4   4  11  997.63   43.11
   4  -4 -11 1010.27   43.02
   4   4 -11  993.03   43.00
   4  -4 -11  957.60   42.54
   4  -4 -10  105.04    7.13
   4   4 -10  119.61   10.64
  -4   4  10  104.37    8.67
   4  -4 -10  107.95    8.62
   4   4 -10  111.17    8.09
   4  -4  -9  542.25   24.70
   4   4  -9  571.13   26.30
   4   4  -9  540.76   25.36
   4   4  -9  569.83   25.06
  -4   4   9  584.40   25.38
   4  -4  -9  540.27   25.26
  -4   4   8    2.62    5.22
   4  -4  -8    8.31    5.75
   4   4  -8    8.32    5.21
   4   4  -8    1.54    5.01
   4  -4  -8    4.18    4.25
   4   4  -8    3.47    4.54
  -4   4   8    7.46    7.60
   4   4  -8    5.70    4.96
   4   4  -7  336.92   15.36
  -4   4   7  324.29   15.60
   4   4  -7  324.42   15.43
  -4   4   7  328.99   16.29
   4   4  -7  318.19   15.45
   4  -4  -7  339.69   16.29
   4  -4  -7  324.40   15.69
   4   4  -7  344.20   15.24
   4   4  -6 1250.21   54.03
   4  -4  -6 1279.92   55.01
   4   4  -6 1262.28   54.20
   4  -4  -6 1294.89   54.32
  -4   4   6 1274.71   54.46
   4   4  -6 1243.89   54.18
  -4   4   6 1225.32   55.48
  -4   4   6 1279.40   54.30
  -4   4   5  907.33   41.35
   4   4  -5  917.17   40.11
   4   4  -5  953.52   40.35
  -4   4   5  942.67   40.49
  -4   4   5  954.33   40.42
   4   4  -4  154.95    7.91
   4   4  -4  150.34    7.81
  -4   4   4  162.89    8.00
  -4   4   4  152.65    8.72
  -4   4   4  155.39    8.06
   4  -4  -3  672.57   29.04
   4   4  -3  655.83   28.11
   4   4  -3  636.67   28.12
  -4   4   3  628.16   28.76
  -4  -4   2  222.37    9.65
   4   4  -2  227.76   10.24
   4  -4  -2  211.68   11.15
  -4  -4   2  199.94    9.63
   4   4  -2  223.16   10.19
   4   4  -1  349.82   15.54
   4   4  -1  333.05   15.41
  -4   4   1  351.99   16.44
   4  -4  -1  335.00   16.49
  -4  -4   1  339.19   15.43
  -4  -4   1  353.66   15.30
   4   4   0   46.65    4.18
  -4   4   0   50.83    5.42
  -4  -4   0   43.85    4.13
   4  -4   0   44.19    5.19
  -4   4  -1  330.25   15.67
   4   4   1  316.33   14.64
   4  -4   1  316.07   15.84
  -4  -4  -1  312.53   15.04
   4   4   2  164.72    8.92
  -4   4  -2  194.27    8.78
   4   4   2  175.49    9.14
   4  -4   2  160.42   10.03
  -4  -4  -2  167.81    9.57
  -4   4  -3   41.12    4.13
  -4  -4  -3   39.81    4.51
   4   4   3   36.69    4.82
  -4   4  -3   39.24    4.58
  -4  -4  -3   32.06    5.02
   4   4   3   37.73    4.92
   4  -4   3   37.48    4.22
  -4   4  -4  642.77   28.04
  -4  -4  -4  624.25   28.16
  -4   4  -4  648.81   28.18
  -4  -4  -5   18.54    5.68
  -4   4  -5   18.41    4.80
  -4   4  -5   21.40    5.30
  -4  -4  -6   35.75    6.74
  -4   4  -6   40.39    5.72
  -4   4  -6   49.89    6.38
  -4  -4  -7   29.68    7.24
  -4   4  -7   30.89    6.07
  -4   4  -8  122.42    8.42
  -4  -4  -8  119.00    9.41
  -4   4  -9  192.30   10.73
  -4  -4  -9  202.02   11.59
  -4   4 -10  127.63    8.19
  -4  -4 -10  131.29    9.17
  -4   4 -11  383.65   18.33
  -4   4 -11  416.69   18.65
   4   4  11  389.62   19.17
  -4  -4 -11  402.33   18.76
  -4  -4 -12   15.21    4.68
  -4   4 -12   20.31    4.31
   4   4  12   17.48    4.98
  -4  -4 -13   59.59    4.52
   4   4  13   54.98    4.88
   4   5 -16  102.01    6.05
   4  -5 -15   92.38    5.78
   4  -5 -15   85.57    6.35
   4  -5 -14  121.40    8.65
   4   5 -14  133.93    8.97
   4  -5 -14  133.63    7.93
   4   5 -14  140.86    8.41
   4  -5 -13   10.51    6.68
   4   5 -13    8.49    6.88
   4   5 -13    6.75    5.69
   4  -5 -13    4.95    5.13
   4  -5 -12    5.03    5.17
  -4   5  12    4.29    6.37
   4  -5 -12    1.96    6.96
   4   5 -12   -3.78    8.00
   4   5 -12    5.73    5.58
  -4   5  11   64.08    7.84
   4   5 -11   59.42    6.65
   4   5 -11   61.94    9.33
   4  -5 -11   59.36    6.81
   4  -5 -10   64.75    7.46
   4   5 -10   56.65    6.55
   4   5 -10   63.37    9.33
  -4   5  10   62.57    7.72
   4  -5 -10   56.31    5.33
   4  -5  -9   21.36    6.53
   4   5  -9   14.65    6.97
   4   5  -9   30.54    5.79
  -4   5   9   20.65    9.78
   4  -5  -9   18.68    4.29
   4  -5  -8    5.92    5.92
   4   5  -8   -1.18    5.31
   4  -5  -8    0.72    3.83
   4   5  -8    0.35    4.75
   4   5  -8   -2.13    5.24
  -4   5   8   -1.87    8.33
   4   5  -7  266.00   12.64
   4   5  -7  258.36   12.68
  -4   5   7  266.67   14.10
   4  -5  -7  262.84   13.13
   4   5  -7  242.45   12.24
   4   5  -6  917.07   39.85
  -4   5   6  923.96   40.27
   4   5  -5  728.63   30.83
  -4   5   5  680.49   31.03
   4   5  -4  623.06   26.45
  -4   5   4  603.87   26.56
  -4   5   4  563.51   27.43
   4   5  -3  182.02    8.78
   4   5  -3  172.39    8.77
  -4   5   3  171.70    8.85
   4  -5  -3  171.34    9.89
  -4   5   2 1562.43   67.51
   4   5  -2 1597.49   67.47
   4   5  -2 1606.66   67.48
  -4   5   2 1561.38   67.40
   4  -5  -2 1578.34   68.63
  -4  -5   2 1585.34   67.74
  -4   5   1  232.09   11.20
   4   5  -1  242.94   11.11
   4   5  -1  241.50   11.00
  -4   5   1  230.20   10.93
  -4  -5   1  247.14   11.16
   4  -5  -1  233.90   12.34
  -4  -5   1  208.33   10.96
  -4  -5   1  229.00   11.05
  -4   5   0  984.51   41.76
   4   5   0  996.29   41.75
   4   5   0  967.96   41.60
  -4   5   0  978.14   42.80
  -4   5   0  966.70   41.55
   4  -5   0  960.56   42.99
  -4  -5   0  904.76   41.96
  -4   5  -1 1211.91   51.57
   4   5   1 1187.33   51.41
  -4   5  -1 1211.56   51.40
  -4  -5  -1 1143.67   52.06
   4   5   1 1229.15   51.63
  -4   5  -2 1067.82   44.95
   4   5   2 1071.12   45.26
   4   5   2 1026.79   44.90
  -4  -5  -2  998.33   45.83
  -4   5  -3  588.23   26.33
   4   5   3  604.36   26.74
  -4  -5  -3  597.05   26.31
  -4   5  -4  204.81   10.66
   4   5   4  207.10   11.49
  -4  -5  -4  198.53   10.82
  -4   5  -5  318.82   15.10
  -4   5  -5  309.81   14.99
   4   5   5  300.35   15.85
  -4  -5  -5  301.93   15.27
  -4  -5  -6    4.67    6.76
  -4   5  -6    0.93    5.62
  -4   5  -6    3.96    5.87
   4   5   6    3.03    7.58
  -4   5  -7  497.02   23.31
  -4  -5  -7  531.41   23.73
  -4   5  -7  500.52   23.33
   4   5   7  506.14   24.48
  -4  -5  -8   69.28    7.63
  -4   5  -8   71.15    6.69
  -4   5  -8   63.83    7.12
   4   5   8   82.79    8.44
  -4   5  -9  320.63   16.02
  -4   5  -9  345.90   16.19
   4   5   9  322.99   17.04
  -4  -5  -9  333.95   16.51
  -4  -5 -10  193.55   10.96
  -4   5 -10  198.16   10.87
   4   5  10  200.14   11.55
   4   5  11  246.70   12.85
  -4  -5 -11  245.73   12.47
  -4  -5 -12    1.00    3.81
   4   5  12    6.56    4.19
  -4  -5 -13   26.01    3.09
  -4   5 -13   28.84    3.01
   4   5  13   21.46    3.13
   4   6 -16   64.71    4.02
   4  -6 -15    7.54    3.76
   4   6 -15    9.12    3.69
   4  -6 -14    1.23    5.28
   4   6 -14   -0.89    4.34
   4  -6 -14   -3.40    3.42
   4  -6 -13    9.73    6.46
   4   6 -13   14.63    4.99
   4  -6 -13    8.05    4.43
   4  -6 -12   88.59    8.92
   4   6 -12  103.76    7.22
   4  -6 -12   96.48    7.03
   4   6 -11  100.36    7.34
   4  -6 -11   98.22    7.46
   4  -6 -10   -0.18    5.57
   4   6 -10    6.78    4.89
   4   6  -9    4.34    4.97
   4  -6  -9    7.11    6.39
  -4   6   9   -0.11    9.72
   4   6  -8   56.78    5.50
   4  -6  -8   53.53    6.87
  -4   6   8   58.32   10.01
  -4   6   7   26.62    6.54
   4   6  -7   22.51    5.22
  -4   6   7   33.17    8.69
   4  -6  -7   28.09    6.35
  -4   6   6   41.41    6.19
   4   6  -6   33.07    4.97
  -4   6   6   38.97    7.24
  -4   6   5   22.44    5.31
  -4   6   5   14.82    6.24
   4   6  -5   22.69    4.42
  -4   6   4   14.34    5.04
   4   6  -4   14.85    4.15
  -4   6   4   14.21    5.26
  -4   6   3   -1.49    4.56
   4   6  -3   -0.82    3.72
  -4   6   3   -2.33    4.66
   4   6  -2   59.92    4.86
  -4   6   2   57.50    5.47
  -4   6   2   63.53    5.46
   4   6  -1  214.13   10.49
   4   6  -1  215.11   10.36
  -4   6   1  206.29   10.62
  -4   6   1  214.56   10.83
   4   6   0  913.65   39.77
   4   6   0  908.75   39.58
  -4   6   0  930.87   39.77
  -4   6   0  918.47   39.88
  -4   6  -1  176.84    9.53
   4   6   1  170.50    9.29
   4   6   1  165.77    8.68
  -4   6  -1  179.69    9.25
  -4   6  -2  944.92   40.63
   4   6   2  939.49   40.68
  -4   6  -2  913.93   40.48
  -4   6  -3   15.77    5.61
   4   6   3   16.70    5.31
  -4   6  -4  385.07   17.78
   4   6   4  402.95   18.83
   4   6   4  368.75   18.34
  -4  -6  -4  375.52   18.04
  -4   6  -5  122.64    8.35
   4   6   5  140.05   10.40
  -4  -6  -5  123.82    8.96
  -4  -6  -6   80.85    7.75
  -4   6  -6   85.43    7.30
   4   6   6   71.43    9.58
  -4  -6  -7   58.52    7.15
  -4   6  -7   60.79    6.33
   4   6   7   63.18    9.06
  -4  -6  -8  148.11    9.65
  -4   6  -8  155.54    9.21
   4   6   8  142.35   11.22
  -4  -6  -9   22.91    5.95
  -4   6  -9   24.71    5.50
   4   6   9   21.93    7.17
  -4   6 -10  174.51    9.27
   4   6  10  152.13   10.12
  -4  -6 -10  159.90    9.49
  -4  -6 -11   -1.89    4.24
  -4   6 -11    3.12    3.98
   4   6  11   -2.10    4.42
  -4  -6 -12  238.85   10.98
  -4   6 -12  254.61   11.04
  -4   6 -12  242.96   10.79
   4  -7 -15   20.89    3.17
   4   7 -14   57.60    4.47
   4   7 -14   58.97    4.58
   4  -7 -14   63.81    5.60
   4  -7 -13   12.38    6.04
   4   7 -13   12.28    4.16
   4  -7 -13    9.00    3.44
  -4   7  12  130.69    8.63
   4   7 -12  119.27    7.45
   4  -7 -12  115.69    7.33
   4  -7 -12  131.52    9.40
  -4   7  11   59.02    7.37
   4  -7 -11   53.49    5.55
   4   7 -11   57.00    5.38
  -4   7  10   10.85    6.51
   4   7 -10   11.94    4.29
  -4   7   9   84.31    8.03
  -4   7   9   90.32   10.69
   4  -7  -9   89.66    7.15
  -4   7   8   29.51    7.45
   4  -7  -8   26.90    6.32
  -4   7   8   32.72    9.90
  -4   7   7  174.43   10.57
  -4   7   7  162.94   12.10
   4   7  -7  166.79    9.59
   4  -7  -7  151.74    9.99
   4  -7  -6    0.75    6.19
   4   7  -6   11.29    4.54
  -4   7   6    5.69    8.16
  -4   7   6    7.55    6.45
   4   7  -6    3.62    4.46
   4   7  -5  179.89    9.87
  -4   7   5  211.75   11.11
  -4   7   5  201.48   11.63
   4   7  -5  186.90    9.96
   4   7  -4   81.87    5.75
  -4   7   4   80.75    7.44
   4   7  -4   82.35    5.96
  -4   7   4   82.49    7.22
  -4   7   3  159.46    9.43
   4   7  -3  156.62    8.58
  -4   7   3  158.81    9.47
  -4   7   2   39.90    5.81
   4   7  -2   40.24    4.78
  -4   7   2   33.32    5.97
   4   7  -1  316.88   14.88
  -4   7   1  306.06   15.29
  -4   7   1  327.61   15.34
  -4   7   0   33.77    5.62
   4   7   0   23.82    4.60
  -4   7   0   26.35    5.56
   4   7   1  965.82   42.59
  -4   7  -1  971.16   42.68
  -4   7  -1 1009.06   42.84
  -4   7  -2   56.16    6.39
   4   7   2   53.13    5.80
  -4   7  -2   50.30    6.13
  -4   7  -3  525.27   23.42
   4   7   3  505.25   23.52
   4   7   3  512.77   23.65
  -4   7  -3  497.19   23.31
   4   7   4  111.09    9.18
  -4   7  -4  123.82    8.60
   4   7   4  111.06    9.27
  -4   7  -4  118.84    8.29
  -4  -7  -4  115.27    8.31
  -4   7  -5  372.98   17.69
  -4  -7  -5  372.06   17.71
   4   7   5  354.96   19.09
  -4  -7  -6   40.20    6.09
  -4   7  -6   34.68    5.95
   4   7   6   31.29    8.50
  -4   7  -7  278.93   13.53
  -4  -7  -7  291.74   13.59
  -4  -7  -8    3.06    5.50
  -4   7  -8  -10.74    5.04
   4   7   8    6.43    7.68
  -4   7  -9  571.10   24.12
  -4  -7  -9  536.24   24.15
  -4  -7 -10   19.74    4.38
   4   7  10   14.57    4.67
  -4   7 -10   18.08    4.17
  -4   7 -10   16.93    4.04
  -4   7 -11  108.98    5.98
  -4   7 -11  111.38    6.08
  -4  -7 -11  101.91    6.07
   4  -8 -14    5.57    3.59
   4  -8 -13   95.17    6.96
  -4   8  12   -1.57    5.12
   4  -8 -12    3.79    6.16
   4   8 -12   -7.13    4.84
   4   8 -11   85.91    7.70
   4  -8 -11   78.89    5.76
  -4   8  11   82.99    7.19
   4   8 -10  103.98    8.58
   4  -8 -10   96.25    6.68
  -4   8  10   98.09    8.14
  -4   8   9  147.65    9.62
  -4   8   9  137.08   11.48
   4   8  -9  141.98    9.55
   4  -8  -9  132.68    8.35
   4   8  -8   87.52    7.45
  -4   8   8   86.00   10.31
   4  -8  -8   95.75    7.23
  -4   8   8   97.81    8.15
  -4   8   7  365.26   18.56
   4   8  -7  335.31   16.88
   4  -8  -7  355.43   16.90
  -4   8   7  351.34   17.17
  -4   8   6  229.43   12.15
  -4   8   6  210.89   13.27
   4   8  -6  197.30   11.23
   4  -8  -6  210.55   11.68
  -4   8   5  395.93   19.41
   4   8  -5  369.07   18.16
  -4   8   5  407.47   18.86
  -4   8   4   54.87    7.05
  -4   8   4   60.93    7.98
   4   8  -4   64.14    6.10
  -4   8   3  273.15   14.47
   4   8  -3  258.55   13.38
  -4   8   3  284.85   14.08
  -4   8   2   42.86    6.60
   4   8  -2   45.59    5.82
  -4   8   2   54.33    7.13
  -4   8   1   59.35    6.82
   4   8  -1   59.91    6.01
  -4   8   1   53.93    7.13
  -4   8   0  161.95    9.71
   4   8   0  150.91    9.55
  -4   8   0  168.16   10.09
   4   8   1  169.93   10.35
  -4   8  -1  179.41   10.61
  -4   8  -1  170.00   10.26
  -4   8  -2  265.18   13.69
   4   8   2  255.00   13.95
  -4   8  -2  282.02   13.83
  -4   8  -3   -3.58    5.52
   4   8   3    1.80    6.67
  -4   8  -3    0.63    5.88
   4   8   4   27.87    5.82
  -4   8  -4   20.37    5.70
   4   8   4   26.37    6.58
  -4   8  -4   31.02    6.05
  -4   8  -5    1.62    5.24
  -4  -8  -5    8.62    5.15
   4   8   5   10.16    5.82
  -4   8  -5   14.60    5.74
  -4   8  -6   88.33    7.01
   4   8   6   94.06    8.51
  -4  -8  -6   79.02    6.93
  -4   8  -6   93.28    7.24
  -4  -8  -7   26.99    5.38
  -4   8  -7   19.29    5.06
  -4   8  -7   19.83    5.38
  -4   8  -8  475.43   21.58
  -4  -8  -8  454.58   21.47
  -4   8  -8  493.42   21.60
  -4  -8  -9   40.51    4.65
  -4   8  -9   38.05    4.45
  -4   8  -9   40.97    4.71
  -4   8 -10  213.42    9.56
  -4  -8 -10  186.95    9.38
  -4   8 -10  193.50    9.37
   4  -9 -13  204.41   10.06
   4  -9 -12   78.89    6.66
  -4   9  11   45.63    5.46
   4   9 -10  584.31   28.35
  -4   9  10  664.86   28.09
   4  -9  -9    5.80    3.90
  -4   9   9    3.38    5.33
  -4   9   9   -1.49    8.59
   4   9  -9   -0.57    5.50
  -4   9   8  497.96   22.71
   4   9  -8  453.07   21.42
  -4   9   8  500.87   21.49
  -4   9   7    6.24    6.06
   4  -9  -7    9.86    4.83
  -4   9   7   18.67    8.83
   4   9  -7    7.64    5.11
  -4   9   6  538.22   24.57
   4   9  -6  487.90   23.52
   4  -9  -6  510.42   23.52
  -4   9   6  542.46   23.90
  -4   9   5   66.44    7.00
   4  -9  -5   64.78    6.43
   4   9  -5   67.06    6.23
  -4   9   5   72.68    8.66
  -4   9   4  169.37   10.94
   4   9  -4  157.96    9.33
  -4   9   4  155.17    9.92
  -4   9   3   25.53    6.06
  -4   9   3   34.94    7.16
   4   9  -3   34.16    5.59
  -4   9   2   17.28    6.08
   4   9  -2   28.79    5.66
  -4   9   2   24.18    7.12
  -4   9   1    2.49    6.49
  -4   9   1    4.46    5.56
   4   9  -1    1.02    5.46
  -4   9   0  191.19   10.33
   4   9   0  178.43   10.58
  -4   9   0  186.46   11.19
  -4   9  -1   13.49    5.35
   4   9   1    4.47    5.85
  -4   9  -1   10.53    6.21
   4   9   2  138.61    9.55
  -4   9  -2  165.14    9.58
  -4   9  -2  146.87    9.22
  -4   9  -3   45.69    5.78
   4   9   3   52.06    7.02
  -4   9  -3   45.04    6.43
  -4   9  -4    4.69    4.88
  -4   9  -4   17.43    5.64
  -4   9  -5  156.08    9.48
  -4   9  -5  156.44    9.21
  -4   9  -6   39.06    5.35
  -4   9  -6   45.49    5.71
  -4   9  -7  256.98   12.19
  -4   9  -7  230.41   11.97
  -4   9  -8    5.61    3.52
  -4   9  -8   -3.19    4.02
  -4   9  -9  193.63    9.39
   4 -10 -12   20.95    3.92
   4 -10 -11  901.54   39.23
  -4  10  10   13.73    4.19
  -4  10   9  407.45   19.11
  -4  10   9  427.64   20.02
  -4  10   8    1.26    4.84
  -4  10   8    3.47    7.76
   4  10  -8    2.73    5.11
  -4  10   7  727.14   28.87
   4  10  -7  586.07   27.71
   4 -10  -7  551.74   27.12
  -4  10   7  681.95   27.71
  -4  10   6   -2.37    5.39
   4 -10  -6    0.07    4.45
  -4  10   6    7.14    8.17
   4  10  -6   -5.11    5.00
  -4  10   5  223.46   12.28
   4  10  -5  179.19   10.28
   4 -10  -5  167.60   10.08
  -4  10   5  205.57   10.68
  -4  10   4   -7.20    5.32
  -4  10   4   -8.05    7.34
   4  10  -4    2.10    4.86
  -4  10   3   23.56    5.53
  -4  10   3   22.65    7.42
   4  10  -3   25.95    5.32
  -4  10   2    0.18    5.09
   4  10  -2    5.76    5.13
  -4  10   2    0.50    6.48
   4  10  -1  147.90    9.39
  -4  10   1  175.42   10.27
  -4  10   1  148.75    9.30
  -4  10   0   66.76    7.51
  -4  10   0   74.41    6.62
  -4  10  -1  168.80   10.12
  -4  10  -1  149.12    9.31
  -4  10  -2   19.54    5.17
  -4  10  -2   16.88    6.01
  -4  10  -3  545.65   24.03
  -4  10  -3  501.21   23.84
  -4  10  -4   23.70    5.21
  -4  10  -4   35.33    5.71
  -4  10  -5   32.43    4.94
  -4  10  -5   32.37    5.48
  -4  10  -6   39.24    4.56
  -4  10  -6   50.03    5.22
  -4  10  -7    3.32    3.84
  -4  10  -8   17.82    3.31
   4 -11 -11    3.55    3.02
  -4  11   9   82.25    5.13
  -4  11   8  104.17    8.33
  -4  11   8  103.61    6.34
  -4  11   7   79.04    8.24
  -4  11   7   72.56    5.67
  -4  11   6  104.69    8.85
  -4  11   6   76.81    6.12
  -4  11   5   23.83    4.78
  -4  11   5   28.39    7.53
   4 -11  -4  112.28    7.40
  -4  11   4  126.31    7.92
  -4  11   3   43.43    5.34
   4 -11  -3   42.78    5.19
  -4  11   3   54.85    7.54
  -4  11   2   22.47    5.11
  -4  11   2   38.74    7.08
  -4  11   1   87.63    6.87
  -4  11   1  114.38    8.46
  -4  11   0    8.71    4.80
  -4  11   0    2.32    6.15
  -4  11  -1   19.00    4.94
  -4  11  -1   18.50    6.09
  -4  11  -2    0.77    4.45
  -4  11  -2   15.34    5.62
  -4  11  -3    4.05    5.05
  -4  11  -4   15.13    4.82
  -4  11  -5  247.57   12.04
  -4  11  -6   15.79    3.58
  -4  11  -7   84.82    4.89
   4 -12  -9   12.09    3.31
  -4  12   7   24.43    5.09
  -4  12   6   35.50    6.01
  -4  12   5   20.48    6.07
  -4  12   4   66.32    6.99
  -4  12   3   12.02    5.98
  -4  12   2  204.41   11.27
  -4  12   1    1.43    5.47
  -4  12   0   95.71    7.22
  -4  12  -1    0.34    4.90
  -4  12  -2   -7.19    4.53
  -4  12  -3    1.17    3.97
  -4  12  -4    9.37    3.57
  -4  12  -5    3.91    2.68
  -4  13   5   21.55    3.85
  -4  13   4   -2.39    3.94
  -4  13   3   17.04    4.32
  -4  13   2   31.72    4.48
  -4  13   1   90.09    5.88
  -4  13   0   13.53    3.68
  -4  13  -1   16.99    3.43
   5   0 -17    1.56    3.61
   5   0 -16  178.09    9.78
   5   0 -15    1.52    5.82
   5   0 -14  107.73    8.37
   5   0 -13   -1.04    6.55
   5   0 -12   65.26    7.72
   5   0 -12   60.05    8.11
   5   0 -11    3.10    6.79
   5   0 -11    6.60    6.53
   5   0 -10  812.51   35.08
  -5   0  10  776.01   34.54
  -5   0   9    0.67    3.93
   5   0  -9    1.64    5.48
   5   0  -8  214.56   10.88
   5   0  -8  223.47   11.16
   5   0  -8  191.89   11.75
  -5   0   8  226.93   10.45
   5   0  -7    1.15    4.07
   5   0  -7    1.71    3.73
   5   0  -7    0.46    2.88
   5   0  -7   -1.53    4.08
   5   0  -6  563.60   19.61
   5   0  -6  602.61   19.41
   5   0  -6  595.36   19.85
   5   0  -6  597.41   20.79
   5   0  -5    0.95    3.39
   5   0  -5    2.63    2.87
   5   0  -5   -1.51    2.51
   5   0  -5   -2.31    2.94
   5   0  -5    1.93    3.32
   5   0  -4 1308.55   54.85
   5   0  -4 1282.18   54.85
   5   0  -4 1247.97   55.58
   5   0  -3   -2.54    2.82
  -5   0   3    0.59    2.55
   5   0  -3    2.30    2.63
   5   0  -3    5.98    4.70
   5   0  -2    6.20    2.95
   5   0  -2    1.06    2.71
  -5   0   2    1.36    2.90
   5   0  -2    2.26    4.49
  -5   0   2    1.07    1.95
   5   0  -1    2.67    3.13
   5   0  -1    1.25    2.74
   5   0  -1    3.35    4.90
   5   0   0 1691.77   72.86
  -5   0   0 1749.80   73.38
   5   0   1    1.65    3.19
  -5   0  -1    0.76    3.60
   5   0   1   -0.79    2.89
   5   0   2  119.96    6.85
  -5   0  -2  121.92    7.67
   5   0   2  119.39    6.94
  -5   0  -2  127.39    6.42
  -5   0  -3   -0.79    3.38
  -5   0  -3   -0.40    3.25
  -5   0  -3    4.33    4.12
   5   0   3   -3.95    3.14
  -5   0  -4 1740.24   74.24
  -5   0  -4 1744.35   74.29
  -5   0  -5   -0.07    4.83
  -5   0  -5    5.83    4.18
  -5   0  -6 1880.31   80.17
  -5   0  -6 1876.04   80.37
  -5   0  -7   -2.05    6.03
  -5   0  -7   -2.77    4.93
  -5   0  -8   11.22    5.94
  -5   0  -8    7.78    4.84
  -5   0  -9   -5.83    4.41
  -5   0  -9    4.76    5.79
   5   0  10  354.39   18.07
  -5   0 -10  412.75   18.19
  -5   0 -11   -0.39    5.28
   5   0  11   -3.39    4.02
   5   0  12  583.12   25.95
   5   0  13    0.49    3.14
   5   1 -18   26.28    2.77
   5  -1 -17   -1.08    3.19
   5   1 -17   -3.79    3.69
   5   1 -16    4.36    3.52
   5   1 -16   -2.58    4.87
   5  -1 -16    1.65    4.35
   5   1 -15    1.96    5.65
   5  -1 -15    3.96    5.40
   5  -1 -15    3.37    6.01
   5   1 -14  115.68    9.06
   5  -1 -14  111.54    8.74
   5   1 -14  113.24    8.85
   5  -1 -14  117.40    8.40
   5   1 -13  260.96   14.24
   5  -1 -13  263.13   13.77
   5   1 -12  234.70   12.88
   5  -1 -12  211.65   12.46
   5  -1 -11  455.69   20.33
   5   1 -11  411.97   20.52
  -5   1  11  416.83   19.80
  -5   1  10  260.88   13.03
   5  -1 -10  277.62   13.72
   5   1 -10  272.79   13.73
   5  -1 -10  250.37   13.76
   5   1  -9  257.66   12.73
   5  -1  -9  268.88   12.86
   5   1  -9  256.52   12.87
   5   1  -9  242.78   12.94
   5  -1  -9  245.79   12.99
  -5   1   9  251.60   12.38
  -5   1   8   36.86    4.30
   5  -1  -8   29.32    5.33
   5   1  -8   29.34    5.11
   5   1  -8   37.50    5.17
   5   1  -8   34.23    5.00
   5   1  -8   29.95    5.09
   5  -1  -7 1023.23   44.19
   5   1  -7 1026.33   44.30
   5   1  -7 1045.91   44.12
   5   1  -7 1020.03   44.40
   5  -1  -7 1043.35   44.39
   5   1  -7  982.62   45.17
   5  -1  -7 1028.88   45.40
  -5   1   7 1027.26   44.15
   5  -1  -6   80.39    5.14
   5   1  -6   82.43    5.35
   5   1  -6   81.22    4.88
   5  -1  -6   81.19    4.58
   5  -1  -6   67.12    4.63
   5   1  -6   80.81    5.47
   5   1  -6   88.07    6.06
   5  -1  -6   77.21    6.15
   5  -1  -6   85.85    5.68
  -5   1   6   77.44    4.90
   5  -1  -5  661.39   28.90
   5   1  -5  663.23   29.05
   5   1  -5  665.15   28.93
   5  -1  -5  635.05   29.15
   5   1  -5  683.01   29.11
   5   1  -5  671.67   29.62
   5  -1  -5  684.45   29.14
  -5   1   5  681.23   28.86
   5   1  -4    7.30    3.25
   5   1  -4    6.27    2.96
   5  -1  -4    3.06    3.18
   5   1  -3 2517.84  106.72
   5  -1  -3 2536.00  106.66
   5   1  -3 2487.84  106.67
   5  -1  -3 2552.16  107.22
   5   1  -3 2466.16  106.82
  -5   1   3 2560.17  106.90
  -5   1   2  298.93   13.02
   5   1  -2  266.13   12.83
   5  -1  -2  282.93   12.78
   5   1  -2  269.59   12.72
   5  -1  -2  296.04   13.61
  -5   1   2  276.18   12.61
  -5   1   1 2263.88   94.61
   5  -1  -1 2161.48   94.33
   5   1  -1 2176.78   94.26
  -5  -1   1 2328.73   94.46
   5  -1  -1 2193.36   95.17
   5  -1   0  391.50   17.38
   5   1   0  402.73   17.57
   5   1   0  379.42   17.67
  -5  -1   0  427.51   17.95
   5  -1   0  401.59   18.69
   5   1   0  372.09   17.36
   5   1   1  181.18    9.97
   5  -1   1  190.95    9.31
   5   1   1  198.55    9.57
  -5   1  -1  204.30   10.29
  -5  -1  -1  205.63   10.10
   5  -1   1  207.89   10.95
   5   1   1  184.66    9.31
   5   1   2   57.88    4.71
   5  -1   2   55.19    4.45
   5   1   2   56.46    5.84
  -5  -1  -2   59.34    5.24
  -5   1  -2   59.59    5.39
   5  -1   2   61.63    6.18
   5  -1   2   57.35    5.03
   5   1   2   49.97    4.30
  -5   1  -2   52.23    4.20
  -5   1  -3 2670.94  111.31
  -5   1  -3 2637.79  112.53
  -5  -1  -3 2669.72  112.47
   5  -1   3 2482.91  112.13
  -5   1  -3 2667.91  111.31
  -5  -1  -3 2585.54  111.22
  -5   1  -4  211.56   10.19
  -5   1  -4  210.70   10.25
  -5  -1  -4  208.99   10.19
  -5  -1  -5 1899.00   82.29
  -5  -1  -5 1932.32   82.12
  -5   1  -5 1925.09   82.29
  -5   1  -5 1960.44   82.39
  -5   1  -6   16.10    5.65
  -5  -1  -6    9.39    5.58
  -5  -1  -6    3.54    4.13
  -5   1  -6    9.24    5.05
  -5  -1  -7  262.90   13.01
  -5   1  -7  259.09   13.55
  -5   1  -7  285.47   14.02
  -5  -1  -7  284.12   14.02
  -5   1  -8   72.25    5.85
  -5  -1  -8   72.17    5.68
  -5   1  -8   76.18    6.66
   5   1   8   86.18    8.09
  -5   1  -8   78.07    7.36
  -5  -1  -8   73.60    7.31
  -5   1  -9  267.34   13.33
  -5   1  -9  290.38   13.68
  -5   1  -9  311.52   14.34
  -5  -1  -9  287.30   14.14
  -5  -1 -10    1.28    5.44
  -5   1 -10    8.57    3.88
  -5   1 -10    5.26    4.48
  -5   1 -10    0.35    5.64
   5   1  10   -0.71    4.33
   5  -1  11  270.18   14.69
  -5  -1 -11  349.91   14.91
   5  -1  12   37.88    3.88
   5   1  12   46.95    5.38
   5  -1  12   46.90    4.79
   5  -1  13  157.76    7.87
   5   1  13  162.25    8.22
   5   2 -18    4.56    2.17
   5  -2 -17  227.22   10.44
   5  -2 -16   51.99    4.76
   5  -2 -16   51.28    5.40
   5  -2 -15   37.04    5.32
   5   2 -15   35.31    4.97
   5  -2 -15   39.56    6.03
   5   2 -14    5.32    5.00
   5  -2 -14   19.01    6.17
   5  -2 -14   15.51    5.30
   5  -2 -13  739.31   32.72
   5   2 -13  740.49   33.21
   5  -2 -13  737.25   33.06
   5   2 -13  728.95   33.05
  -5   2  12  113.25    8.40
   5   2 -12  125.39    9.69
   5  -2 -12  138.64    9.60
   5   2 -12  126.30    9.27
   5  -2 -12  126.30    8.84
   5  -2 -11  428.21   19.72
   5   2 -11  420.70   20.13
  -5   2  11  398.91   19.45
   5   2 -11  419.07   19.90
   5  -2 -10  112.35    7.90
   5   2 -10   98.59    7.90
   5   2 -10  103.57    8.44
  -5   2  10  103.30    7.45
   5   2  -9  322.56   15.51
   5  -2  -9  335.09   15.77
   5   2  -9  320.28   16.00
  -5   2   9  318.72   15.36
   5   2  -8  279.40   13.45
   5   2  -8  275.21   13.67
  -5   2   8  280.82   13.33
   5  -2  -8  279.12   13.74
   5   2  -7  102.29    6.42
   5   2  -7   98.05    6.52
   5  -2  -7   90.52    6.69
   5  -2  -7   97.31    7.32
  -5   2   7  101.08    6.17
  -5   2   6    5.21    3.34
   5  -2  -6    3.51    3.87
   5  -2  -6    2.51    2.86
   5  -2  -6    7.78    3.02
   5   2  -6    3.45    3.74
   5   2  -6    6.72    3.15
   5   2  -6   -1.20    4.37
   5  -2  -5  186.24    8.81
   5   2  -5  184.27    9.08
   5  -2  -5  180.42    9.40
   5   2  -5  186.97    9.16
   5   2  -5  184.46    9.78
  -5   2   5  197.62    9.14
   5  -2  -4   46.96    4.43
   5   2  -4   51.83    4.00
  -5   2   4   49.68    3.86
   5   2  -4   41.79    3.57
  -5   2   4   53.62    4.45
   5  -2  -3  131.54    7.44
  -5   2   3  122.12    6.74
  -5   2   3  123.31    6.45
  -5   2   2  734.29   32.28
   5  -2  -2  757.29   32.41
   5  -2  -2  773.10   33.30
  -5   2   2  794.73   32.86
  -5   2   2  716.81   32.45
   5   2  -1   88.39    5.86
  -5   2   1  107.27    6.56
  -5  -2   1  103.38    5.52
   5  -2  -1   97.39    6.78
  -5   2   1   92.77    5.36
  -5   2   0  176.10    9.40
   5   2   0  162.17    8.83
  -5  -2   0  182.91    8.91
   5  -2   0  161.34    9.79
   5   2   1   77.07    5.93
   5  -2   1   73.33    4.63
  -5  -2  -1   81.01    5.63
   5  -2   1   80.60    6.72
  -5  -2  -2   45.64    4.94
   5   2   2   44.37    5.65
   5  -2   2   40.44    3.84
   5  -2   2   47.42    5.83
   5  -2   2   33.43    4.86
  -5  -2  -3   31.83    3.90
  -5   2  -3   33.34    4.27
   5   2   3   31.01    6.58
  -5  -2  -3   28.91    4.79
   5  -2   3   29.14    4.71
  -5  -2  -4  278.76   13.21
   5   2   4  260.25   15.38
  -5   2  -4  273.67   13.33
  -5   2  -4  289.69   13.44
  -5   2  -5   53.84    5.89
  -5  -2  -5   36.68    5.44
  -5   2  -5   43.19    5.74
   5   2   5   34.44    8.60
  -5   2  -6  155.13    8.64
   5   2   6  171.84   11.93
  -5   2  -6  164.39    9.48
  -5   2  -6  160.61    9.72
  -5  -2  -6  161.38    9.75
  -5   2  -7  100.98    6.88
  -5   2  -7   90.77    7.81
   5   2   7   93.42    9.40
  -5   2  -7  104.88    8.32
  -5  -2  -7   99.43    7.90
  -5   2  -8  261.34   13.03
   5   2   8  238.76   13.91
  -5   2  -8  284.99   13.79
  -5   2  -8  297.71   14.12
  -5  -2  -8  268.42   13.96
  -5   2  -9  375.53   17.83
  -5   2  -9  400.00   18.40
  -5  -2  -9  396.36   18.53
  -5   2 -10  126.38    7.58
  -5   2 -10  144.32    8.38
  -5  -2 -10  141.58    8.75
   5  -2  11  108.13    7.52
  -5  -2 -11  139.99    7.84
  -5  -2 -12   28.48    4.29
   5  -2  12   23.95    3.83
   5  -2  12   22.73    3.64
   5   2  13   38.45    3.95
   5   3 -17    3.92    3.25
   5  -3 -16  326.60   13.78
   5   3 -16  335.75   13.92
   5  -3 -15    8.65    3.98
   5   3 -15    2.86    3.95
   5  -3 -15    9.21    5.10
   5   3 -15    1.67    5.43
   5   3 -14  197.77   11.43
   5  -3 -14  230.53   12.04
   5   3 -14  246.43   12.24
   5  -3 -14  218.89   11.37
   5  -3 -13    9.38    6.24
   5   3 -13   13.74    5.44
   5   3 -13   22.46    6.33
   5  -3 -13   15.59    5.16
   5   3 -12  969.79   43.22
   5   3 -12  983.47   43.33
   5  -3 -12  985.90   43.05
   5   3 -12 1010.99   43.04
  -5   3  12  962.72   42.83
   5  -3 -12  961.26   42.68
   5   3 -11  285.88   14.99
   5   3 -11  296.53   15.21
   5  -3 -11  293.92   15.13
   5  -3 -11  292.35   14.29
  -5   3  11  288.73   14.59
   5   3 -11  296.34   14.88
   5  -3 -11  255.86   14.51
   5  -3 -10  744.30   32.43
   5   3 -10  749.45   32.96
   5  -3 -10  705.39   32.75
  -5   3  10  720.08   32.54
   5   3 -10  744.24   32.64
   5   3  -9  286.97   14.67
  -5   3   9  307.29   14.71
   5   3  -9  310.53   15.05
   5  -3  -9  320.77   14.77
   5   3  -9  290.15   15.11
   5  -3  -9  285.53   15.19
   5   3  -8  444.95   20.02
   5   3  -8  437.94   20.25
   5   3  -8  434.54   20.33
  -5   3   8  435.09   20.07
  -5   3   7   52.37    5.31
   5   3  -7   54.80    5.07
   5   3  -7   54.49    5.53
   5   3  -7   53.35    5.40
   5   3  -6  400.88   16.91
   5   3  -6  374.45   17.04
   5   3  -6  373.30   16.83
   5   3  -6  354.39   16.94
   5  -3  -6  335.25   17.27
  -5   3   6  372.52   17.90
   5  -3  -6  381.88   17.20
  -5   3   6  371.35   16.91
   5   3  -5  104.22    6.32
   5   3  -5   99.65    5.99
   5  -3  -5   97.64    6.50
  -5   3   5  111.87    7.00
  -5   3   5   96.80    6.13
  -5   3   4  290.47   13.29
   5   3  -4  294.86   13.42
   5  -3  -4  272.14   13.92
  -5   3   4  290.38   13.88
   5   3  -3  168.46    8.56
   5   3  -3  167.73    8.45
   5  -3  -3  169.92    9.18
  -5   3   3  165.70    8.70
  -5   3   3  170.64    8.41
  -5   3   2  628.57   26.46
   5   3  -2  630.49   26.58
  -5   3   2  681.30   27.26
  -5  -3   2  564.78   25.94
   5  -3  -2  636.37   27.61
  -5   3   1   50.95    4.32
  -5   3   1   53.55    5.30
   5   3  -1   51.56    4.62
   5   3  -1   54.20    4.68
  -5  -3   1   62.07    4.02
   5  -3  -1   52.19    5.51
   5   3   0   92.86    6.23
   5   3   0   94.69    6.16
  -5   3   0   96.32    6.86
  -5  -3   0   94.61    5.92
   5  -3   0  100.73    7.21
   5   3   1   20.02    4.56
   5   3   1   20.33    4.19
  -5   3  -1   21.41    5.10
  -5  -3  -1   17.20    3.90
   5  -3   1   15.21    5.03
   5   3   2   30.21    5.80
   5   3   2   39.24    4.88
  -5  -3  -2   29.91    4.67
   5   3   3   35.56    7.13
   5   3   3   47.02    5.50
   5   3   4   89.70    7.29
  -5  -3  -4   81.03    5.99
  -5   3  -5   71.73    5.38
  -5  -3  -5   70.17    5.96
  -5  -3  -6    1.25    5.99
  -5   3  -6    5.77    4.29
  -5   3  -6    0.08    5.91
   5   3   6    6.30    8.32
  -5  -3  -7   -1.02    6.16
  -5   3  -7    2.11    4.49
  -5   3  -7   -2.62    6.08
   5   3   7   10.22    6.38
  -5   3  -8  121.70    7.64
  -5   3  -8  137.65    8.75
  -5  -3  -8  129.79    8.88
  -5  -3  -9   39.75    6.13
  -5   3  -9   35.27    4.63
  -5   3  -9   44.90    6.28
   5   3   9   36.50    7.17
  -5   3 -10  766.77   35.17
  -5   3 -10  864.27   35.65
   5   3  10  801.85   35.99
  -5  -3 -10  821.56   35.60
  -5  -3 -11   28.25    4.93
   5   3  11   27.41    5.51
   5  -3  11   20.98    3.79
   5   3  12  289.14   13.23
  -5  -3 -12  286.02   12.65
   5   3  13    7.22    3.03
   5   4 -17  200.96    9.43
   5   4 -16   11.19    3.85
   5  -4 -16    7.33    3.59
   5  -4 -15  474.38   21.71
   5   4 -15  484.14   21.82
   5   4 -14  101.05    6.98
   5  -4 -14  108.50    7.89
   5   4 -14  122.27    7.86
   5  -4 -14   96.86    6.42
   5   4 -13  239.89   12.35
   5  -4 -13  268.06   12.80
   5   4 -13  250.32   12.74
   5  -4 -13  220.52   11.76
  -5   4  13  254.76   12.62
   5  -4 -13  202.33   12.16
  -5   4  12    4.06    6.16
   5  -4 -12    9.90    6.13
   5  -4 -12    5.06    5.92
   5   4 -12    1.45    5.32
   5   4 -12   -4.33    5.89
   5  -4 -12    9.00    4.56
   5  -4 -11  274.46   15.36
   5  -4 -11  294.33   14.56
   5   4 -11  312.05   15.31
   5  -4 -11  330.07   15.63
   5   4 -11  318.04   15.23
  -5   4  11  285.60   15.23
  -5   4  10    6.42    6.53
   5  -4 -10   11.02    6.86
   5   4 -10    8.12    5.94
   5  -4 -10    9.06    5.08
  -5   4   9   31.77    6.93
   5  -4  -9   36.41    7.20
   5  -4  -9   18.11    5.72
   5   4  -9   26.76    6.21
   5   4  -9   40.02    6.25
   5   4  -9   24.77    6.86
   5   4  -8  158.08    9.47
  -5   4   8  163.59   10.48
   5   4  -8  150.74    9.55
   5  -4  -8  157.33    9.89
  -5   4   8  159.10    9.60
   5   4  -8  152.66    8.97
  -5   4   7   11.44    5.21
   5  -4  -7   12.97    5.66
   5   4  -7   10.44    5.22
  -5   4   7    9.70    6.38
   5   4  -7    7.46    4.38
   5   4  -7   14.82    4.95
   5   4  -6 1100.57   47.20
   5   4  -6 1119.80   47.43
  -5   4   6 1117.28   47.51
   5  -4  -6  997.94   48.07
  -5   4   6 1125.55   47.50
   5   4  -5   63.25    4.59
   5   4  -5   61.96    5.19
   5  -4  -5   55.06    5.40
  -5   4   5   58.53    5.53
  -5   4   5   62.97    5.34
   5   4  -4  191.59    9.23
   5   4  -4  184.05    9.13
   5  -4  -4  154.66    9.71
  -5   4   4  166.62    9.53
  -5   4   4  181.08    9.18
  -5   4   3    1.86    3.47
   5   4  -3   -1.97    3.70
   5   4  -3   -1.59    3.56
   5  -4  -3    4.17    3.98
   5   4  -2  252.23   11.99
   5   4  -2  255.07   11.96
   5  -4  -2  237.20   13.01
  -5   4   2  250.90   11.88
  -5   4   1   16.01    4.02
   5   4  -1   21.78    4.18
  -5   4   1   32.02    5.14
   5   4  -1   19.42    3.91
   5  -4  -1   18.64    4.84
  -5   4   0  641.67   29.24
   5   4   0  675.61   29.38
   5  -4   0  658.12   30.58
  -5   4   0  713.19   30.37
   5   4   1   56.50    5.71
   5   4   1   62.73    5.56
   5   4   2  737.61   33.71
   5   4   2  771.65   33.42
  -5   4  -3  527.29   21.80
   5   4   3  530.10   22.35
  -5   4  -4   69.48    6.45
   5   4   4   68.02    7.00
  -5  -4  -4   68.38    5.61
  -5   4  -5  268.46   12.07
  -5   4  -5  235.54   12.72
   5   4   5  264.32   13.59
  -5  -4  -5  274.08   12.54
  -5   4  -6  245.03   12.54
   5   4   6  273.41   14.15
  -5  -4  -6  248.40   13.14
  -5   4  -7  336.09   16.31
  -5  -4  -7  352.08   16.87
   5   4   7  367.28   17.69
  -5   4  -8    5.00    4.26
   5   4   8    3.28    6.48
   5   4   9  108.69    8.50
  -5  -4  -9  104.24    7.84
  -5  -4 -10    2.48    4.87
   5   4  10   -5.78    6.00
   5   4  11  103.62    7.36
  -5  -4 -11  103.26    6.49
  -5  -4 -12   13.73    3.01
   5   4  12   14.19    3.98
  -5   4 -13    8.71    2.16
   5   4  13    4.39    2.26
   5   5 -16   83.54    5.24
   5   5 -15   29.47    4.50
   5  -5 -15   24.64    4.19
   5  -5 -14   96.45    6.57
   5   5 -14   89.54    6.73
   5  -5 -13  169.71    9.48
   5   5 -13  154.88    9.44
  -5   5  13  162.20    9.69
   5  -5 -12  145.35    8.84
   5   5 -12  129.56    8.48
   5  -5 -12  111.25    7.19
  -5   5  12  140.80    9.14
   5  -5 -12  124.56    9.11
   5  -5 -11  112.04    8.36
   5   5 -11   99.63    7.50
  -5   5  11   88.02    8.19
   5  -5 -11   87.93    6.38
   5  -5 -10   85.41    6.54
   5  -5 -10   97.21    8.49
  -5   5  10  101.68    8.70
   5  -5  -9  112.23    7.44
   5  -5  -9  118.47    9.19
   5   5  -9  111.62    7.81
  -5   5   9  117.67    9.21
   5   5  -8  293.33   14.50
  -5   5   8  298.22   15.66
   5  -5  -8  290.71   15.04
   5   5  -8  279.84   13.96
  -5   5   8  294.68   14.92
   5   5  -7  413.16   19.08
  -5   5   7  412.10   19.72
   5  -5  -7  415.31   19.51
   5   5  -7  390.80   18.60
  -5   5   7  431.60   19.33
   5   5  -6  560.41   25.14
  -5   5   6  568.55   25.35
  -5   5   6  556.22   25.45
   5   5  -5  622.85   27.35
  -5   5   5  606.61   27.41
  -5   5   5  621.46   27.47
  -5   5   4   42.82    5.42
   5   5  -4   42.22    5.04
   5   5  -4   52.65    5.10
  -5   5   4   42.94    4.89
   5   5  -3  128.62    7.62
   5   5  -3  134.01    7.58
  -5   5   3  123.51    7.19
   5   5  -2  193.04    9.82
   5   5  -2  192.41    9.74
  -5   5   2  179.00    9.24
   5   5  -1 1038.93   44.44
   5   5  -1 1052.13   44.45
  -5   5   1 1001.74   44.07
   5   5   0  471.16   20.69
   5   5   0  458.43   20.61
  -5   5   0  439.21   20.11
   5   5   1 1605.65   66.36
   5   5   1 1503.55   66.29
  -5   5  -1 1531.09   65.87
   5   5   2  151.61    9.20
   5   5   2  151.20    8.95
  -5   5  -2  152.81    8.15
   5   5   3  708.50   30.20
   5   5   3  634.57   29.86
   5   5   4   62.46    7.85
  -5   5  -5  546.81   24.05
   5   5   5  522.33   24.77
  -5  -5  -5  510.60   23.80
  -5  -5  -6    1.29    5.26
  -5   5  -6   -1.92    5.88
   5   5   6    5.86    7.12
  -5   5  -7  116.74    8.19
   5   5   7  120.52    9.43
  -5  -5  -7  100.96    7.69
  -5  -5  -8   11.55    5.27
  -5   5  -8   17.70    5.75
   5   5   8   15.10    6.71
  -5  -5  -9   -0.15    4.87
   5   5   9    2.20    6.01
  -5  -5 -10   11.17    4.37
   5   5  10   10.03    5.29
  -5  -5 -11    4.71    3.29
   5   5  11    5.74    4.14
  -5   5 -12   64.37    4.18
   5   5  12   59.81    4.38
   5   6 -15   12.31    3.30
   5  -6 -15   13.27    2.84
   5  -6 -14   36.81    4.84
   5   6 -14   40.93    4.74
   5  -6 -14   43.35    4.58
   5  -6 -13   13.45    4.84
  -5   6  13   21.60    5.86
   5  -6 -13    6.81    5.56
   5   6 -13   14.11    4.93
  -5   6  12   40.69    6.81
   5  -6 -12   39.90    5.79
   5  -6 -12   39.80    6.71
   5   6 -12   30.53    5.41
  -5   6  11   34.00    6.94
   5  -6 -11   26.29    6.07
   5   6 -11   30.61    5.26
   5   6 -10    6.30    4.73
  -5   6  10    6.22    7.00
   5  -6 -10   -4.34    6.10
   5   6  -9   18.41    4.92
   5  -6  -9   10.38    6.99
  -5   6   9    8.24    8.20
   5   6  -8  308.25   15.46
  -5   6   8  306.66   16.97
   5  -6  -8  326.24   16.20
   5  -6  -7    0.27    6.57
   5   6  -7   -3.96    5.07
  -5   6   7    0.28    7.53
   5   6  -6  300.13   14.44
  -5   6   6  289.06   15.24
   5   6  -5  117.76    7.51
  -5   6   5  116.61    8.44
   5   6  -4  202.08   10.45
  -5   6   4  188.33   10.50
   5   6  -3  174.56    9.41
  -5   6   3  165.88    9.30
   5   6  -2  639.66   27.94
   5   6  -2  642.90   27.91
  -5   6   2  604.28   27.70
  -5   6   2  631.24   28.01
   5   6  -1  110.66    7.54
   5   6  -1  112.78    7.41
  -5   6   1  117.52    7.10
  -5   6   1  121.58    7.90
  -5   6   0 1969.40   80.17
   5   6   0 1897.75   80.16
   5   6   0 1820.75   80.00
  -5   6   0 1824.80   79.81
  -5   6  -1   63.10    6.41
   5   6   1   54.62    6.18
   5   6   1   48.99    5.17
  -5   6  -1   48.96    5.28
  -5   6  -2  542.07   23.65
   5   6   2  532.46   23.71
   5   6   2  484.14   23.09
  -5   6  -2  511.67   23.05
  -5   6  -3   10.34    6.02
   5   6   3    4.65    6.57
  -5   6  -3    7.47    4.80
  -5   6  -4  523.74   24.32
   5   6   4  527.69   24.79
   5   6   5    8.92    7.31
   5   6   6  481.12   22.75
  -5  -6  -6  448.52   20.95
  -5  -6  -7    3.66    4.82
   5   6   7    1.75    7.03
   5   6   8  516.37   22.76
  -5  -6  -8  447.04   21.34
  -5  -6  -9   39.96    4.93
  -5   6  -9   50.61    5.74
   5   6   9   58.15    6.75
  -5   6 -10  263.94   11.78
   5   6  10  248.54   12.11
  -5   6 -10  225.84   10.99
  -5  -6 -10  230.32   11.23
  -5   6 -11    8.18    3.14
   5   6  11    5.99    3.22
   5  -6  12   98.22    5.18
   5  -7 -14    6.79    3.62
   5  -7 -14   14.88    2.87
   5  -7 -13   57.88    6.18
   5  -7 -13   72.10    5.27
   5  -7 -12   10.92    4.69
   5  -7 -12    9.88    6.36
   5  -7 -11   89.01    7.03
   5  -7 -10   55.73    6.47
  -5   7   9  228.69   13.45
   5  -7  -9  225.58   12.27
   5  -7  -8    8.66    6.43
  -5   7   8    7.12    8.13
   5   7  -7  392.72   18.71
  -5   7   7  386.32   20.00
   5  -7  -7  406.92   19.51
  -5   7   7  414.53   19.52
  -5   7   6   27.30    7.17
   5   7  -6   26.31    5.31
  -5   7   6   11.65    7.58
   5   7  -5  270.53   13.44
  -5   7   5  264.40   14.32
  -5   7   5  281.06   14.31
   5   7  -4  198.07   10.30
  -5   7   4  182.54   10.93
  -5   7   4  185.02   11.07
   5   7  -3  360.20   16.63
  -5   7   3  331.50   16.77
  -5   7   3  366.24   17.30
  -5   7   2   30.72    6.38
   5   7  -2   35.04    5.53
  -5   7   2   27.28    5.75
   5   7  -1 1072.28   46.76
  -5   7   1 1069.65   46.72
  -5   7   1 1090.40   46.98
  -5   7   0   49.59    6.82
   5   7   0   48.42    5.72
  -5   7   0   50.23    5.85
   5   7   1  991.98   44.61
  -5   7  -1 1005.81   44.33
  -5   7  -1 1068.65   44.71
  -5   7  -2  210.05   11.41
   5   7   2  194.42   11.41
  -5   7  -2  196.90   10.73
  -5   7  -3  246.53   12.94
  -5   7  -3  230.27   12.09
  -5   7  -4   88.88    7.61
   5   7   4   87.55    8.71
  -5   7  -4   76.89    6.45
  -5   7  -5  272.86   13.80
   5   7   5  256.96   15.39
  -5   7  -5  271.02   13.23
  -5   7  -6    6.75    5.75
   5   7   6    1.45    7.79
  -5   7  -6    5.83    4.25
  -5   7  -7  271.57   12.93
   5   7   7  233.94   14.74
  -5   7  -7  236.52   12.13
  -5   7  -8   20.08    5.15
   5   7   8   17.81    6.63
  -5   7  -8   15.95    3.95
  -5   7  -9   63.37    5.36
   5   7   9   58.64    6.09
  -5   7  -9   50.55    4.22
  -5   7 -10   -1.21    3.24
   5   7  10    2.81    3.13
   5  -8 -13  112.37    6.95
   5  -8 -12   22.03    3.70
  -5   8  12   21.36    5.22
   5  -8 -12   25.13    5.65
   5  -8 -11  145.92    8.65
  -5   8  11  179.82    9.83
  -5   8  10    9.28    5.98
   5  -8 -10    6.00    4.78
  -5   8   9   21.34    6.50
   5  -8  -9   23.01    5.50
  -5   8   9   15.78    7.95
  -5   8   8  149.37   10.92
   5  -8  -8  144.32    9.16
  -5   8   8  138.88    9.76
  -5   8   7  302.86   16.99
   5  -8  -7  328.14   16.24
  -5   8   7  350.61   16.52
   5   8  -6  246.16   12.92
  -5   8   6  276.21   14.66
   5  -8  -6  293.02   14.06
  -5   8   6  268.70   14.14
  -5   8   5   61.42    7.48
  -5   8   5   56.67    7.90
   5   8  -5   53.89    5.44
   5   8  -4   97.95    6.91
  -5   8   4  104.24    8.73
  -5   8   4  116.53    8.74
   5   8  -3  191.91   10.41
  -5   8   3  192.31   11.48
  -5   8   3  217.35   11.80
   5   8  -2  214.29   11.42
  -5   8   2  223.90   12.18
  -5   8   2  239.28   12.65
  -5   8   1   12.11    6.35
   5   8  -1   16.81    4.76
  -5   8   1   16.62    5.93
   5   8   0  150.91    8.75
  -5   8   0  139.21    9.08
  -5   8   0  155.34    9.62
  -5   8  -1   38.26    6.52
   5   8   1   38.48    5.48
  -5   8  -1   43.22    6.00
  -5   8  -2   10.38    5.72
   5   8   2    2.61    5.00
  -5   8  -2    4.99    5.18
  -5   8  -3   21.65    5.82
   5   8   3   12.30    5.66
  -5   8  -3   25.09    5.10
  -5   8  -4   81.46    7.11
   5   8   4   69.45    7.93
  -5   8  -4   86.47    6.53
  -5   8  -5  208.77   10.23
  -5   8  -5  202.41    9.77
  -5   8  -6  165.29    8.80
  -5   8  -6  148.32    8.28
  -5   8  -7   60.67    5.62
  -5   8  -7   61.59    5.03
  -5   8  -8  270.64   13.07
  -5   8  -8  300.76   13.48
  -5   8  -9   25.40    3.55
   5  -9 -13    5.93    2.91
  -5   9  12  190.26    8.98
   5  -9 -12  153.69    9.06
  -5   9  11   19.68    4.65
   5  -9 -10  131.14    8.03
  -5   9  10  179.06    9.05
   5  -9  -9   49.90    5.50
  -5   9   9   65.43    6.48
  -5   9   9   69.16    7.89
  -5   9   8  397.61   18.09
  -5   9   8  377.54   18.85
   5  -9  -8  354.62   17.60
  -5   9   7   47.53    6.80
   5  -9  -7   49.02    6.15
  -5   9   7   52.32    8.22
  -5   9   6  377.97   18.92
   5  -9  -6  368.01   18.18
  -5   9   6  394.77   18.44
  -5   9   5  155.89   10.54
  -5   9   5  145.74    9.59
  -5   9   4   97.56    8.31
  -5   9   4   84.80    7.89
  -5   9   3   98.98    8.16
  -5   9   3   88.40    7.78
  -5   9   2   43.47    6.54
  -5   9   2   48.77    6.55
  -5   9   1  203.20   11.09
  -5   9   1  188.53   11.06
  -5   9   0    0.10    5.69
  -5   9   0    3.89    5.36
  -5   9  -1  244.59   12.57
  -5   9  -1  234.54   12.80
  -5   9  -2   11.11    5.23
  -5   9  -2   11.99    5.07
  -5   9  -3   18.65    5.30
  -5   9  -3    9.45    5.10
  -5   9  -4   95.83    6.84
  -5   9  -4   89.53    6.91
  -5   9  -5   17.77    4.81
  -5   9  -5   18.49    4.71
  -5   9  -6  104.68    6.38
  -5   9  -6   91.91    6.57
  -5   9  -7  120.61    6.86
  -5   9  -7  134.04    7.14
  -5   9  -8   70.70    4.52
  -5  10  11  203.58    9.50
   5 -10 -11  182.62    9.85
  -5  10  10   10.38    4.03
  -5  10   9  303.66   14.51
  -5  10   8   11.46    5.03
   5 -10  -8   12.23    3.84
  -5  10   8   -0.17    6.65
  -5  10   7  412.11   20.06
   5 -10  -7  385.27   18.96
  -5  10   7  454.13   19.41
  -5  10   6   -0.26    5.10
   5 -10  -6    7.72    4.87
  -5  10   6   -3.34    6.96
  -5  10   5  339.37   16.82
   5 -10  -5  302.38   15.91
  -5  10   5  354.39   16.22
  -5  10   4  179.64   10.95
  -5  10   4  173.80   10.13
  -5  10   3   -5.17    5.44
  -5  10   3    0.46    6.22
  -5  10   2  171.90    9.79
  -5  10   2  161.27   10.15
  -5  10   1   17.01    5.35
  -5  10   1   16.55    5.88
  -5  10   0  109.85    8.04
  -5  10   0  117.04    7.74
  -5  10  -1    6.48    4.86
  -5  10  -1   13.12    5.28
  -5  10  -2   42.89    5.54
  -5  10  -2   40.08    5.72
  -5  10  -3   87.32    6.81
  -5  10  -3   98.58    6.85
  -5  10  -4  211.81   10.92
  -5  10  -4  222.40   11.09
  -5  10  -5   10.49    3.99
  -5  10  -5    7.09    3.75
  -5  10  -6    8.80    2.99
  -5  10  -6   10.85    3.11
   5 -11 -10   62.72    4.81
  -5  11   9   35.74    3.69
  -5  11   8  151.43    7.98
  -5  11   7   37.03    4.57
  -5  11   7   37.21    6.16
  -5  11   6    7.69    4.19
   5 -11  -6    4.89    3.48
  -5  11   6   10.40    5.98
  -5  11   5   51.20    5.35
   5 -11  -5   49.42    4.85
  -5  11   5   57.11    6.86
  -5  11   4   -5.12    4.47
   5 -11  -4    5.83    4.37
  -5  11   4    3.83    6.01
  -5  11   3  187.20   10.34
   5 -11  -3  170.42    9.59
  -5  11   3  173.31    9.63
  -5  11   2   -3.21    4.69
  -5  11   2    3.80    5.73
  -5  11   1  180.01   10.27
  -5  11   1  187.11    9.90
  -5  11   0   -1.42    4.34
  -5  11   0   -7.25    5.15
  -5  11  -1   82.16    6.33
  -5  11  -1   73.15    5.77
  -5  11  -2    3.26    3.77
  -5  11  -2    0.81    4.07
  -5  11  -3    1.21    3.23
  -5  11  -3    0.22    3.76
  -5  11  -4    9.40    3.39
  -5  11  -5   21.19    2.90
  -5  12   6  147.06    7.34
  -5  12   6  115.83    6.30
  -5  12   5   -1.39    2.66
  -5  12   5    4.43    4.63
  -5  12   4   74.74    5.67
  -5  12   4   51.52    4.27
  -5  12   3    2.14    2.91
  -5  12   3    4.93    4.73
  -5  12   2  261.71   11.57
   5 -12  -2  214.12   10.85
   5 -12  -1    5.02    3.34
  -5  12   1    6.97    4.33
  -5  12   0  175.95    9.14
  -5  12  -1    4.04    3.52
  -5  12  -2   40.67    3.80
   6   0 -17    3.08    3.38
   6   0 -16    0.34    4.50
   6   0 -15   -1.96    5.56
   6   0 -15    2.05    5.89
   6   0 -14  186.05   10.99
   6   0 -14  170.88   10.67
   6   0 -13   -2.68    6.59
   6   0 -13   -5.01    6.73
   6   0 -12  236.49   12.99
   6   0 -12  219.92   12.67
   6   0 -11    6.25    7.10
   6   0 -10  302.76   15.47
   6   0  -9   -9.18    6.01
   6   0  -9   -1.22    5.48
   6   0  -8  714.31   31.62
   6   0  -8  724.75   31.90
   6   0  -7   -2.77    4.69
   6   0  -7    2.37    4.27
   6   0  -7   -0.22    3.24
   6   0  -6 1185.35   50.65
   6   0  -6 1212.10   50.54
   6   0  -6 1182.21   50.84
   6   0  -6 1099.27   51.42
   6   0  -5    0.50    3.97
   6   0  -5    3.34    3.53
   6   0  -5    0.26    3.24
   6   0  -5    1.27    3.57
   6   0  -4 1120.09   47.69
   6   0  -4 1078.92   47.63
   6   0  -4 1136.10   47.73
   6   0  -3   -1.80    3.32
   6   0  -3    0.12    3.33
  -6   0   3   -2.16    2.78
   6   0  -3   -0.83    3.28
  -6   0   3    0.71    2.21
   6   0  -2  518.02   23.43
  -6   0   2  550.07   23.43
   6   0  -2  521.06   23.27
  -6   0   1   -0.70    2.64
   6   0  -1   -3.50    3.94
   6   0  -1    0.89    3.30
   6   0   0   20.17    3.87
   6   0   0   16.85    3.25
   6   0   1    1.72    3.92
  -6   0  -1    1.67    3.75
   6   0   2  500.52   21.69
   6   0   2  440.82   20.99
  -6   0  -3   -0.27    3.63
   6   0   3    3.17    4.80
   6   0   4  571.80   25.31
  -6   0  -4  550.38   24.79
  -6   0  -5   -2.54    4.73
   6   0   5   -1.40    5.79
   6   0   6  339.22   16.38
  -6   0  -6  322.61   15.84
  -6   0  -7    2.78    5.10
   6   0   7   -2.85    6.13
   6   0   7    0.68    5.71
   6   0   8  147.11    9.95
   6   0   8  145.94    9.54
  -6   0  -8  163.35    9.14
  -6   0  -9   -0.86    4.95
   6   0   9   -7.64    5.55
   6   0   9    5.96    5.62
   6   0  10   13.06    4.46
   6   0  10   16.88    4.90
   6   0  11    1.53    4.02
   6   0  12    1.63    2.89
   6   1 -17    7.20    3.68
   6  -1 -17   -0.63    3.10
   6   1 -16   23.93    4.92
   6  -1 -16   32.30    4.69
   6  -1 -16   29.69    5.10
   6   1 -15  123.73    8.75
   6  -1 -15  136.03    8.50
   6  -1 -14   81.54    7.29
   6   1 -14   79.65    7.78
   6   1 -13  342.55   17.27
   6  -1 -13  346.05   17.02
   6  -1 -12   95.25    8.70
   6   1 -12  115.98    9.26
   6  -1 -12  106.64    8.99
   6   1 -11  855.36   38.02
   6  -1 -11  874.73   37.99
   6   1 -11  887.93   38.21
   6  -1 -11  861.90   38.30
  -6   1  11  823.11   37.51
   6   1 -10  193.93   11.16
   6  -1 -10  194.38   11.24
   6   1 -10  192.09   11.39
   6  -1 -10  165.38   11.16
  -6   1  10  190.80   10.13
   6   1  -9  965.21   40.38
   6   1  -9  924.76   40.27
   6   1  -9  915.49   40.47
   6  -1  -9  913.66   40.46
  -6   1   9  891.30   39.91
   6   1  -8    6.84    5.47
  -6   1   8    6.40    4.23
   6  -1  -8    9.52    5.75
   6  -1  -8   10.38    4.72
   6   1  -8   11.69    5.36
   6  -1  -7 2690.66  115.38
   6   1  -7 2726.45  115.49
   6   1  -7 2701.41  115.33
   6  -1  -7 2770.40  115.19
   6   1  -7 2733.72  115.64
   6  -1  -7 2784.47  115.62
   6  -1  -7 2457.70  116.40
  -6   1   7 2744.73  115.31
  -6   1   6    4.24    3.34
   6   1  -6   -2.30    4.31
   6  -1  -6    3.75    4.53
   6  -1  -6    2.18    3.65
   6   1  -6    0.25    4.03
   6   1  -6    1.91    3.53
   6  -1  -6    4.30    3.16
   6  -1  -6    5.08    4.23
   6  -1  -5 4199.45  179.47
   6   1  -5 4239.17  179.58
   6   1  -5 4213.75  179.53
   6   1  -5 4328.81  179.71
   6  -1  -5 4270.98  179.64
  -6   1   5 4231.47  179.40
   6  -1  -4   69.86    4.92
   6  -1  -4   71.58    4.69
   6   1  -4   69.14    5.04
   6  -1  -4   68.24    5.59
  -6   1   4   67.67    4.90
  -6   1   4   70.13    4.58
   6   1  -3 1719.76   72.59
   6  -1  -3 1711.99   72.50
   6  -1  -3 1658.26   72.36
   6   1  -3 1733.64   72.53
   6  -1  -3 1761.28   73.49
  -6   1   3 1644.26   72.47
  -6   1   3 1717.48   72.31
  -6   1   2   21.67    3.18
  -6   1   2   22.62    3.92
   6   1  -2   20.48    4.04
   6  -1  -2   24.01    3.87
   6  -1  -2   22.59    3.28
   6   1  -2   18.08    3.81
  -6  -1   2   21.83    3.19
   6  -1  -2   24.53    4.93
  -6   1   1  173.59    8.65
   6  -1  -1  174.81    9.29
   6  -1  -1  177.77    8.80
   6   1  -1  177.76    9.10
  -6   1   1  191.45    9.57
   6  -1  -1  181.43   10.43
   6   1   0  250.08   13.04
   6  -1   0  280.58   13.15
   6  -1   0  263.62   12.55
   6   1   0  281.65   12.87
  -6  -1   0  267.20   13.08
   6  -1   0  270.16   14.41
   6   1   1  346.23   16.38
   6  -1   1  344.39   15.65
   6   1   1  352.26   15.93
  -6  -1  -1  358.09   16.36
   6  -1   1  302.51   16.15
   6   1   2   37.60    6.22
   6  -1   2   35.56    4.67
   6   1   2   35.93    5.18
   6   1   3  424.18   20.15
   6  -1   3  410.58   19.03
   6   1   3  411.38   19.30
  -6   1  -4   11.50    4.74
  -6  -1  -4    8.73    4.16
   6   1   4    7.03    6.89
   6   1   4   14.56    5.52
   6  -1   4   16.60    4.88
   6   1   5  632.50   29.28
   6   1   5  602.48   28.31
   6  -1   5  648.41   28.17
  -6   1  -5  648.85   27.96
  -6  -1  -5  606.61   27.75
   6   1   6   73.07    9.01
   6   1   6   80.67    7.83
   6  -1   6   82.05    7.07
  -6   1  -6   85.79    7.06
  -6  -1  -6   80.70    6.87
  -6   1  -7    3.46    5.30
  -6  -1  -7    2.44    4.93
   6   1   7    4.61    6.65
   6   1   7    0.60    6.02
   6  -1   7   -4.90    5.32
   6   1   8  662.55   30.79
   6   1   8  653.61   30.80
   6  -1   8  697.25   30.56
  -6  -1  -8  710.58   30.38
   6   1   9   85.90    6.95
   6  -1   9   90.94    7.73
   6   1   9   88.96    7.76
   6  -1   9   95.83    6.98
  -6  -1  -9  103.46    6.88
   6  -1  10  266.45   14.16
   6  -1  10  286.96   14.15
   6   1  10  297.81   14.37
  -6  -1 -10  311.10   13.98
   6  -1  11   55.65    4.62
   6  -1  11   58.49    4.99
   6   1  11   69.61    5.54
   6  -1  12   95.12    5.47
   6   1  12  116.00    5.96
   6  -2 -17   21.53    2.80
   6  -2 -16    6.11    3.83
   6  -2 -16    6.56    4.30
   6   2 -15   26.85    6.03
   6  -2 -15   26.62    5.07
   6  -2 -15   22.07    5.76
   6   2 -14  114.42    8.25
   6  -2 -14   92.49    8.22
   6   2 -14  102.96    8.08
   6  -2 -14   87.81    7.29
   6   2 -13  406.32   19.66
   6   2 -13  403.35   19.47
   6  -2 -13  399.69   19.18
   6  -2 -12  472.51   21.44
   6   2 -12  464.03   21.87
  -6   2  12  444.19   21.03
   6   2 -12  458.62   21.61
   6  -2 -11  662.91   28.59
   6   2 -11  633.33   28.90
  -6   2  11  596.07   28.13
   6   2 -11  635.77   28.59
   6   2 -10  361.19   18.31
   6  -2 -10  415.33   18.46
   6   2 -10  364.83   18.67
   6  -2 -10  379.77   18.69
  -6   2  10  379.53   17.85
   6   2  -9   40.76    6.43
  -6   2   9   48.63    5.81
   6  -2  -9   46.24    7.30
   6   2  -9   51.41    6.52
   6   2  -9   45.70    6.80
   6   2  -8   96.85    7.27
   6   2  -8   89.15    7.37
   6   2  -8   86.83    7.48
   6  -2  -8   94.20    7.78
  -6   2   8   98.85    6.83
  -6   2   7   -4.51    4.52
   6   2  -7   -4.99    5.39
   6  -2  -7   -6.23    5.54
   6  -2  -7   -1.01    4.00
   6   2  -7    2.00    5.17
   6   2  -7   -0.45    3.98
   6  -2  -6  748.59   33.33
   6   2  -6  784.25   33.71
   6   2  -6  759.46   33.51
   6   2  -6  760.82   33.86
  -6   2   6  724.96   34.26
   6  -2  -6  796.54   33.83
  -6   2   6  800.15   33.46
  -6   2   5    0.94    3.50
   6  -2  -5   -0.05    3.09
   6   2  -5    0.39    4.04
   6   2  -5    0.81    3.74
  -6   2   5    4.52    3.46
   6  -2  -4  281.09   12.50
   6  -2  -4  260.05   12.31
   6   2  -4  278.67   12.87
   6   2  -4  269.47   12.78
   6  -2  -4  264.76   13.32
  -6   2   4  255.35   12.89
  -6   2   4  278.86   12.59
   6  -2  -3  652.33   27.82
   6  -2  -3  621.41   27.54
   6   2  -3  663.87   27.98
   6  -2  -3  627.21   28.74
  -6   2   3  656.73   27.72
  -6   2   3  597.96   27.89
  -6   2   2   26.22    3.53
   6  -2  -2   23.51    3.91
   6  -2  -2   20.51    2.99
   6   2  -2   26.44    4.14
  -6   2   2   25.30    4.45
   6  -2  -2   22.36    4.60
  -6   2   1  249.44   11.94
   6   2  -1  249.99   12.39
  -6   2   1  269.71   12.84
   6  -2  -1  260.03   12.28
   6  -2  -1  243.70   11.62
   6   2  -1  265.21   12.30
   6  -2  -1  249.63   13.42
   6   2   0  164.07    9.37
   6  -2   0  163.01    8.31
   6   2   0  167.62    9.00
   6  -2   0  168.36   10.26
  -6   2   0  172.12    9.72
   6   2   1  323.55   15.37
   6  -2   1  298.37   14.22
   6   2   1  317.40   14.81
   6   2   2  368.05   17.92
   6  -2   2  360.39   16.53
   6   2   2  355.46   17.08
   6   2   3   21.03    7.71
   6  -2   3   21.30    4.39
   6   2   3   26.18    5.86
   6   2   4  176.13   12.31
   6   2   4  168.92   10.34
   6  -2   4  164.30    9.28
  -6  -2  -5   56.18    5.49
   6   2   5   57.16    9.43
   6   2   5   45.88    7.15
   6  -2   5   51.59    5.71
   6   2   6  193.46   11.72
   6  -2   6  192.51   10.67
  -6  -2  -6  200.98   10.50
   6   2   7  274.31   14.35
   6   2   7  237.67   13.76
   6  -2   7  270.40   13.26
  -6  -2  -7  271.98   13.14
   6   2   8   77.14    6.86
   6   2   8   73.32    7.97
   6  -2   8   85.32    6.53
  -6  -2  -8   92.76    6.49
   6   2   9  429.67   20.08
   6  -2   9  397.58   19.33
  -6  -2  -9  439.18   19.36
  -6  -2 -10   22.26    4.32
   6  -2  10   22.61    5.22
   6  -2  10   19.47    4.06
   6   2  10   21.05    5.61
   6  -2  11  242.62   11.88
   6  -2  11  235.21   11.55
   6   2  12    8.81    3.08
   6   3 -17   13.35    3.10
   6  -3 -16  135.77    7.34
   6   3 -16  141.28    7.43
   6   3 -15   -2.36    5.13
   6  -3 -15    0.81    3.96
   6  -3 -15   -2.35    5.11
   6  -3 -14  373.20   17.19
   6   3 -14  365.06   17.14
   6  -3 -14  326.53   16.43
   6  -3 -13  105.57    8.45
   6   3 -13  112.11    8.23
  -6   3  13   94.20    7.27
   6  -3 -13  102.55    7.48
   6  -3 -12  502.61   23.66
   6   3 -12  532.96   24.38
   6  -3 -12  531.37   24.24
   6   3 -12  549.70   24.10
  -6   3  12  492.96   23.69
  -6   3  11   44.76    6.43
   6   3 -11   50.24    7.31
   6   3 -11   58.48    7.66
   6  -3 -11   60.79    6.61
  -6   3  10   22.62    6.21
   6  -3 -10   25.17    6.42
   6   3 -10   29.36    6.53
   6   3 -10   21.61    6.98
  -6   3   9   56.59    6.59
   6   3  -9   65.77    6.77
   6   3  -9   64.60    7.57
   6   3  -8   -0.23    5.24
  -6   3   8   -2.87    5.11
   6  -3  -8    0.35    6.44
   6   3  -8    0.11    6.02
  -6   3   7    9.35    4.97
   6  -3  -7   12.39    6.27
   6   3  -7   12.85    4.95
   6   3  -7   10.11    5.47
  -6   3   6   10.11    4.64
   6  -3  -6    3.95    5.52
   6   3  -6    4.78    4.41
  -6   3   5    4.95    4.19
   6   3  -5   -1.44    4.09
  -6   3   5    3.16    3.49
   6  -3  -4  327.30   13.97
   6  -3  -4  285.84   15.10
  -6   3   4  269.21   14.52
  -6   3   4  323.03   14.36
  -6   3   3   18.58    3.86
   6  -3  -3   17.35    3.59
   6   3  -3   19.77    4.21
   6  -3  -3   22.28    4.65
  -6   3   2   62.38    5.17
   6  -3  -2   63.12    5.02
  -6   3   2   71.52    5.98
   6  -3  -2   60.33    6.17
  -6   3   1  156.72    8.34
   6   3  -1  142.92    8.88
   6  -3  -1  148.45    9.69
  -6   3   1  173.45    9.53
  -6   3   0  723.03   31.46
   6   3   0  711.59   31.96
   6   3   1   12.50    5.90
   6   3   2  701.24   32.26
   6   3   3    0.18    7.95
   6   3   4  909.24   42.10
   6  -3   5  636.17   28.08
  -6  -3  -5  673.68   28.11
   6   3   6  685.32   32.99
   6  -3   6  707.21   31.35
  -6  -3  -6  733.09   31.46
  -6  -3  -7   36.55    5.08
   6   3   7   31.15    5.84
   6  -3   7   31.53    4.36
   6  -3   8  326.95   15.88
  -6  -3  -8  363.67   16.22
  -6  -3  -9    4.37    4.32
   6  -3   9    7.39    3.54
  -6  -3 -10  247.58   11.79
   6  -3  11   39.60    4.38
  -6   3 -12   39.28    3.34
   6   4 -17   76.99    4.47
   6   4 -16   41.69    4.31
   6  -4 -16   40.96    4.14
   6  -4 -15  138.24    7.56
   6   4 -15  128.81    7.49
   6  -4 -14  158.35    9.11
   6   4 -14  155.87    8.86
   6  -4 -13   86.62    7.46
   6   4 -13   82.95    7.18
  -6   4  13   70.23    6.88
   6  -4 -13   68.31    6.08
  -6   4  12   57.56    6.72
   6  -4 -12   68.31    7.55
   6   4 -12   57.41    6.72
   6  -4 -12   55.83    5.81
  -6   4  11   75.22    7.67
   6  -4 -11   91.01    7.00
   6  -4 -11   89.86    8.51
   6   4 -11  101.26    7.64
  -6   4  10    3.01    6.31
   6  -4 -10    3.67    7.49
   6  -4 -10    2.98    5.67
   6   4 -10    4.46    5.83
  -6   4   9    6.95    6.47
   6   4  -9   11.00    6.80
   6   4  -9    9.88    6.01
   6   4  -9   -0.56    7.33
   6   4  -8  307.96   14.81
   6   4  -8  334.64   15.47
  -6   4   8  316.55   15.26
  -6   4   7   46.48    6.23
   6   4  -7   40.97    6.21
   6   4  -7   37.69    5.30
   6   4  -6  394.05   18.23
   6   4  -6  401.51   18.64
  -6   4   6  398.89   18.56
  -6   4   5    2.05    4.72
   6   4  -5    1.74    4.06
   6   4  -5    3.29    5.02
  -6   4   4    0.61    4.70
   6   4  -4   -4.13    5.06
   6   4  -4    1.44    4.76
   6   4  -3  121.52    7.59
   6   4  -3  118.08    7.45
  -6   4   3  109.81    7.23
   6  -4  -2  412.55   18.25
   6   4  -2  401.13   18.64
   6   4  -2  406.72   18.66
  -6   4   2  388.78   18.45
  -6   4   1  205.50   10.63
   6   4  -1  203.94   10.79
   6   4  -1  202.88   10.88
  -6   4   0   23.80    5.17
   6   4   0   14.56    5.16
  -6   4  -1  268.13   13.25
   6   4   1  264.48   13.59
   6   4   2  134.05   11.19
   6   4   2  185.46   10.31
   6   4   3  724.02   40.33
   6   4   3 1006.23   39.53
   6   4   4  369.63   14.76
   6   4   4  125.59   11.67
   6   4   5   18.85    7.61
   6   4   5   35.33    7.22
  -6  -4  -6    1.32    4.20
   6   4   6    3.61    5.44
   6   4   6    7.29    6.61
  -6  -4  -7    8.09    4.35
   6   4   7    1.42    6.47
  -6  -4  -8    8.46    4.13
   6   4   8    4.62    6.06
  -6  -4  -9   17.39    3.89
   6   4   9   17.78    6.10
  -6  -4 -10   18.28    3.23
   6   4  10   18.18    4.99
   6  -4  11   10.09    3.65
   6   4  11   12.72    3.85
  -6   4 -12    9.11    2.11
   6   4  12    7.37    2.25
   6   5 -16  131.09    6.90
   6  -5 -16  140.64    6.84
   6  -5 -15  305.63   14.00
   6   5 -15  293.02   13.96
   6  -5 -14  157.95    8.80
   6   5 -14  139.54    8.51
   6  -5 -13  304.41   13.76
   6   5 -13  273.74   13.42
  -6   5  13  295.44   13.62
   6  -5 -12  242.15   12.52
   6   5 -12  237.65   12.13
  -6   5  12  246.96   12.34
   6  -5 -12  204.08   11.21
  -6   5  11   11.73    6.25
   6  -5 -11   14.44    6.61
   6   5 -11   20.05    5.44
   6  -5 -11   22.75    4.47
   6  -5 -10   33.71    5.09
  -6   5  10   18.96    6.65
   6  -5 -10   33.15    7.14
   6   5 -10   22.63    5.35
   6   5  -9  481.13   22.97
   6  -5  -9  504.17   22.53
   6  -5  -9  495.19   23.27
   6   5  -9  469.23   22.43
  -6   5   9  510.13   23.03
  -6   5   8   41.73    7.08
   6  -5  -8   36.11    7.72
   6   5  -8   37.91    7.04
   6   5  -8   33.72    5.51
   6   5  -7  476.00   22.23
  -6   5   7  505.86   22.39
   6   5  -7  462.61   21.56
  -6   5   6   36.22    6.40
   6   5  -6   26.60    6.10
   6   5  -5  110.49    7.99
   6   5  -5  107.83    7.81
  -6   5   5  111.13    7.84
  -6   5   4    0.08    5.54
   6   5  -4    0.24    5.49
   6   5  -4    2.24    4.94
   6   5  -3  292.08   14.00
   6   5  -3  271.55   13.97
  -6   5   3  281.68   13.94
   6   5  -2  188.78   10.79
   6   5  -2  201.67   10.96
  -6   5   2  210.07   10.85
   6   5  -1  662.78   29.68
   6   5  -1  664.78   29.82
  -6   5   1  666.73   29.58
  -6   5   0   -2.88    5.58
   6   5   0    3.06    5.52
   6   5   0    4.42    5.53
   6   5   1  644.63   28.55
   6   5   1  612.51   28.89
   6   5   2  110.79    8.67
   6   5   2   99.53    8.96
   6   5   3   64.23    7.57
   6   5   3   27.96    7.01
   6   5   4  229.07   12.02
   6   5   4  154.12   11.04
   6   5   5   31.69    7.20
   6   5   6  790.96   35.63
   6   5   7   -1.12    6.21
   6   5   8  364.21   17.65
  -6   5  -9    4.85    4.76
   6   5   9    1.64    4.94
   6   5  10  233.84   11.63
  -6   5 -10  234.54   11.31
  -6   5 -11   17.55    2.92
   6  -5  11   10.37    3.07
   6   5  11   15.73    3.12
   6   6 -15    3.06    2.65
   6  -6 -15    3.00    2.92
   6   6 -14  163.56    9.21
   6  -6 -14  208.29    9.54
   6  -6 -13    9.14    5.03
  -6   6  13    7.35    4.95
   6   6 -13    5.62    4.35
   6   6 -12  210.00   11.54
   6  -6 -12  249.80   12.11
  -6   6  12  261.49   12.24
   6  -6 -12  196.17   11.60
   6   6 -11   19.22    4.89
  -6   6  11    8.11    6.42
   6  -6 -11   15.41    6.21
   6  -6 -10  268.26   13.60
   6   6 -10  275.76   14.12
   6  -6 -10  326.96   15.00
  -6   6  10  318.20   15.10
  -6   6   9    4.97    6.55
   6  -6  -9    4.31    6.94
   6  -6  -9    3.83    4.15
   6   6  -9    1.98    5.33
   6   6  -8 1124.20   47.49
  -6   6   8  981.11   47.42
   6  -6  -8 1134.89   47.84
  -6   6   8 1129.60   47.67
  -6   6   7   31.57    7.47
   6  -6  -7   38.52    7.89
   6   6  -7   27.90    6.54
  -6   6   7   28.00    7.21
   6   6  -6  286.02   14.67
  -6   6   6  296.04   15.08
  -6   6   5    6.89    6.20
   6   6  -5    0.95    5.79
   6   6  -4  276.37   13.98
   6   6  -3   83.15    7.20
   6   6  -3   88.14    7.42
   6   6  -2  792.95   35.19
   6   6  -2  796.89   35.19
   6   6  -1  285.83   14.41
   6   6  -1  286.29   14.51
   6   6   0 1090.77   48.34
   6   6   0 1126.55   48.58
   6   6   1   60.20    7.11
   6   6   1   58.95    6.94
   6   6   2  820.25   33.93
   6   6   2  690.05   33.66
  -6   6  -3  133.88    9.66
   6   6   3  143.05    9.99
  -6   6  -4  952.70   42.65
   6   6   4  988.92   43.22
  -6   6  -5    0.67    6.13
   6   6   5    6.47    7.02
  -6   6  -6  686.56   30.65
   6   6   6  676.03   31.33
  -6   6  -7    9.25    5.56
   6   6   7   18.16    6.25
  -6   6  -8   41.25    5.43
   6   6   8   39.88    6.13
  -6   6  -9   -2.37    4.11
   6   6   9   -2.59    4.46
  -6   6 -10    1.26    3.07
   6   6  10   -2.70    3.33
   6  -6  11   10.91    2.19
   6  -7 -14   23.09    3.24
   6  -7 -13  137.22    7.86
  -6   7  13  151.03    8.33
  -6   7  12   13.07    5.44
   6  -7 -12   10.55    4.85
   6  -7 -12   11.95    5.01
   6  -7 -11  169.62   10.15
  -6   7  11  186.26   10.39
  -6   7  10    2.24    6.26
   6  -7 -10   13.80    6.01
   6  -7  -9  464.23   21.85
   6  -7  -8   -1.38    6.27
   6   7  -8    0.09    5.01
  -6   7   8    1.75    6.44
   6   7  -7  495.25   22.34
   6  -7  -7  531.20   23.15
   6  -7  -6   10.76    7.14
   6   7  -6    2.75    5.62
  -6   7   6    5.01    6.38
   6   7  -5  201.54   10.77
  -6   7   5  178.77   11.04
   6   7  -4   60.26    6.70
  -6   7   4   62.65    6.76
   6   7  -3  501.25   21.76
  -6   7   3  441.46   21.41
  -6   7   2   15.94    6.83
   6   7  -2   13.81    5.87
  -6   7   2   14.20    5.16
   6   7  -1 1219.37   51.46
  -6   7   1 1114.54   50.93
  -6   7   1 1249.75   51.61
   6   7   0  225.62   11.97
   6   7   0  214.50   11.68
  -6   7   0  205.92   11.06
  -6   7   0  234.67   12.37
  -6   7  -1   35.08    6.76
   6   7   1   26.37    6.13
   6   7   1   33.74    5.07
  -6   7  -1   24.28    4.71
  -6   7  -2   47.68    6.81
   6   7   2   47.69    6.84
  -6   7  -2   35.98    4.71
  -6   7  -3  101.09    7.86
   6   7   3   85.84    8.38
  -6   7  -3   79.38    5.87
  -6   7  -4   16.42    6.23
   6   7   4   19.31    7.40
  -6   7  -5   96.08    7.63
   6   7   5   76.72    8.93
  -6   7  -6   26.35    5.59
   6   7   6   26.07    7.09
  -6   7  -7  291.34   13.85
   6   7   7  265.30   14.78
  -6   7  -8  169.03    8.80
   6   7   8  157.42    9.34
  -6   7  -9   13.13    3.34
   6   7   9   15.73    3.21
   6  -7  10   32.06    3.30
  -6   7 -10   41.18    2.92
   6  -8 -13   27.44    3.16
   6  -8 -12    5.10    3.71
   6  -8 -12    7.04    4.27
   6  -8 -11   29.97    5.01
   6  -8 -10  148.18    8.83
   6  -8  -9   54.99    6.67
  -6   8   8  245.26   13.86
   6  -8  -8  281.63   13.82
  -6   8   7   79.28    7.92
   6  -8  -7   86.80    7.84
   6   8  -7   74.86    6.23
  -6   8   7   72.50    7.81
  -6   8   6   25.51    6.87
   6  -8  -6   25.05    6.57
   6   8  -6   24.58    5.07
  -6   8   6   30.78    6.53
  -6   8   5    1.86    6.40
   6   8  -5    2.59    4.63
  -6   8   5   -8.13    6.13
  -6   8   4   37.58    6.92
   6   8  -4   29.41    4.99
  -6   8   4   26.40    6.12
  -6   8   3    6.33    6.33
   6   8  -3    4.56    4.71
  -6   8   3   -0.82    5.30
   6   8  -2  464.76   21.29
  -6   8   2  428.32   21.05
  -6   8   2  502.82   21.83
  -6   8   1   -3.60    6.37
   6   8  -1    0.87    5.06
  -6   8   1   -2.24    4.61
   6   8   0  604.47   27.51
  -6   8   0  569.53   27.03
   6   8   1   73.25    7.20
  -6   8  -1   68.80    5.84
  -6   8  -1   86.78    7.27
  -6   8  -2    1.67    5.76
   6   8   2    5.92    6.14
  -6   8  -2    3.23    4.13
  -6   8  -3   15.42    5.75
   6   8   3   15.70    6.70
  -6   8  -3   21.66    4.15
  -6   8  -4   10.42    5.52
   6   8   4    8.89    6.82
  -6   8  -4    7.45    3.74
   6   8   5   77.38    9.85
  -6   8  -5  183.43    8.75
  -6   8  -6   27.89    4.82
   6   8   6   10.11    6.28
   6   8   7  145.53    9.66
  -6   8  -7  209.70    9.40
  -6   8  -8   31.15    3.53
   6  -8   9  205.05    9.49
  -6   9  12   23.71    3.75
   6  -9 -12   15.20    3.32
  -6   9  11    3.49    4.03
   6  -9 -11   -2.70    3.24
   6  -9 -11    4.45    4.26
  -6   9  10    6.49    4.75
   6  -9 -10    2.75    3.84
   6  -9  -9  110.88    7.65
  -6   9   9  144.70    8.42
  -6   9   8    7.61    5.64
   6  -9  -8    8.25    5.13
  -6   9   8    1.13    5.96
  -6   9   7  310.76   16.17
   6  -9  -7  330.49   15.92
  -6   9   7  330.72   16.12
  -6   9   6   26.56    6.21
   6  -9  -6   29.91    6.14
  -6   9   6   20.77    6.56
  -6   9   5   79.64    7.72
   6  -9  -5   95.86    7.72
  -6   9   5   92.87    7.84
  -6   9   4    5.63    6.00
  -6   9   4    5.49    5.67
  -6   9   3  146.61    9.37
  -6   9   3  165.12    9.92
  -6   9   2   25.73    6.23
  -6   9   2   26.03    5.49
  -6   9   1   59.15    6.67
  -6   9   1   49.61    5.80
  -6   9   0    0.28    5.67
  -6   9   0   -0.59    4.56
  -6   9  -1   50.87    6.33
  -6   9  -1   39.07    5.15
  -6   9  -2  292.65   14.78
  -6   9  -2  357.83   15.72
  -6   9  -3   35.44    5.36
  -6   9  -3   24.27    4.08
  -6   9  -4  102.60    6.98
  -6   9  -5   28.13    4.42
  -6   9  -6  144.14    7.71
  -6   9  -7   -1.22    2.70
   6  -9   7    1.61    2.63
  -6  10  11    5.83    2.87
  -6  10  10   46.87    4.44
   6 -10  -9   52.71    4.40
  -6  10   9   57.78    5.09
  -6  10   8   20.08    4.83
   6 -10  -8   18.58    4.20
  -6  10   7   68.92    6.53
   6 -10  -7   62.38    5.82
  -6  10   7   76.89    6.39
  -6  10   6   18.91    5.56
   6 -10  -6   16.18    5.19
  -6  10   6    7.82    5.62
  -6  10   5    2.98    5.39
   6 -10  -5   -3.39    5.27
  -6  10   5   -3.56    5.63
   6 -10  -4   67.17    6.80
  -6  10   4   56.25    6.51
  -6  10   4   72.71    6.67
  -6  10   3   84.76    7.20
  -6  10   3  107.55    7.59
  -6  10   2   69.53    6.44
  -6  10   2   79.42    6.67
  -6  10   1  115.77    7.73
  -6  10   1  139.09    8.35
  -6  10   0   66.65    5.69
  -6  10   0   75.81    6.38
  -6  10  -1   43.44    5.26
  -6  10  -1   27.17    4.43
  -6  10  -2    6.05    4.48
  -6  10  -3  245.98   12.01
  -6  10  -4   17.71    3.77
  -6  10  -5  130.59    6.79
  -6  11   9   20.87    2.98
  -6  11   8   16.87    3.25
  -6  11   7   14.92    3.66
   6 -11  -7   12.53    3.04
   6 -11  -6   50.61    4.54
  -6  11   6   54.74    4.82
  -6  11   5   51.76    4.96
   6 -11  -5   46.53    4.68
  -6  11   5   42.64    5.17
  -6  11   4   11.57    4.05
   6 -11  -4    4.46    4.17
  -6  11   4    9.96    4.62
   6 -11  -3  101.68    6.66
  -6  11   3  109.65    6.55
  -6  11   2   -2.96    4.08
  -6  11   2   -2.00    4.05
  -6  11   1   42.74    4.82
  -6  11   0    6.80    3.80
  -6  11  -1   30.69    4.01
  -6  11  -2    9.39    3.25
  -6  11  -3   47.42    3.50
  -6  12   4  117.35    5.95
  -6  12   3    1.49    2.34
   6 -12  -3    0.97    2.48
   6 -12  -2  121.94    5.92
  -6  12   2   98.75    5.53
   6 -12  -1   -0.89    2.79
   6 -12   0  111.64    5.93
   7   0 -17   -4.26    3.10
   7   0 -16  120.72    7.32
   7   0 -15   -9.52    5.37
   7   0 -15    6.83    5.39
   7   0 -14  233.69   12.81
   7   0 -14  239.32   12.76
   7   0 -13   -2.45    6.43
   7   0 -12  122.32    9.14
   7   0 -11    3.18    6.66
   7   0 -10   16.00    7.14
   7   0  -9   -3.20    6.31
   7   0  -9    3.29    5.78
   7   0  -8 1012.43   43.75
   7   0  -8 1014.31   43.42
   7   0  -8  980.97   43.94
   7   0  -7   -3.57    5.57
   7   0  -7   -1.88    5.18
   7   0  -7    0.72    4.07
   7   0  -6 2059.25   88.72
   7   0  -6 2092.22   88.66
   7   0  -6 2091.34   88.89
   7   0  -5   -2.15    4.64
   7   0  -5    2.64    4.25
   7   0  -5    3.08    3.98
   7   0  -4 3360.71  140.91
   7   0  -4 3302.12  140.82
   7   0  -4 3302.19  140.89
   7   0  -3    0.86    4.47
   7   0  -3   -2.30    4.21
   7   0  -2  800.89   35.13
   7   0  -2  800.11   34.89
   7   0  -1    1.13    5.26
   7   0  -1    2.66    4.39
  -7   0   0  213.52   10.39
   7   0   0  215.49   11.08
   7   0   1   -0.08    5.11
   7   0   2  270.27   14.22
   7   0   2  254.65   13.20
   7   0   3   -1.62    6.98
   7   0   3    2.24    5.54
   7   0   4   84.65    8.95
   7   0   4   78.15    7.25
   7   0   5    1.34    7.00
   7   0   5   -2.35    5.23
   7   0   6  262.40   14.09
   7   0   6  264.92   13.55
   7   0   7    0.10    5.75
   7   0   7    4.54    5.15
   7   0   8   18.97    5.44
   7   0   8   22.16    5.20
   7   0   9   -1.23    4.36
   7   0   9    1.86    4.41
   7   0  10   25.75    3.41
   7   0  10   43.80    4.26
   7   0  11    0.53    2.50
   7   1 -17   33.00    3.68
   7  -1 -17   27.52    3.31
   7  -1 -16   25.17    4.27
   7   1 -15  262.23   12.35
   7  -1 -15  264.06   12.42
   7  -1 -14   -0.09    5.79
   7   1 -14    0.09    5.96
   7  -1 -14    1.50    6.28
   7   1 -13  422.63   20.85
   7  -1 -13  435.66   20.95
   7   1 -13  438.99   20.94
   7  -1 -13  462.97   20.85
   7  -1 -12   17.63    6.71
   7   1 -12   13.16    6.63
   7  -1 -12    7.99    6.61
   7   1 -12   14.73    6.41
   7   1 -11  279.46   13.79
   7  -1 -11  275.54   13.94
   7   1 -11  258.29   13.90
   7  -1 -11  268.47   14.00
  -7   1  11  230.59   12.41
   7   1 -10   33.89    7.17
  -7   1  10   31.32    5.02
   7  -1 -10   36.80    7.40
   7   1 -10   28.22    7.31
   7  -1 -10   28.79    7.38
   7   1  -9  618.60   26.53
   7   1  -9  528.51   26.09
   7   1  -9  596.65   26.35
   7  -1  -9  577.29   26.43
  -7   1   9  567.99   25.55
   7   1  -8   38.68    6.34
  -7   1   8   36.83    4.70
   7  -1  -8   37.66    6.83
   7  -1  -8   36.09    5.71
   7   1  -8   34.89    6.18
   7   1  -8   34.19    4.97
   7  -1  -8   41.10    4.25
   7  -1  -7 1081.19   47.54
   7   1  -7 1099.82   47.73
   7   1  -7 1104.91   47.55
   7  -1  -7 1107.99   47.34
   7   1  -7 1128.93   48.02
   7  -1  -7 1100.48   47.85
  -7   1   7 1084.77   47.37
  -7   1   6   -0.29    3.80
   7   1  -6   -0.80    5.30
   7  -1  -6    4.97    5.41
   7  -1  -6    0.65    4.37
   7   1  -6    1.26    4.97
   7   1  -6    2.38    4.34
   7  -1  -6   -0.91    3.84
   7  -1  -5  900.05   39.78
   7   1  -5  929.64   40.00
   7   1  -5  905.28   39.90
   7  -1  -5  925.93   40.02
  -7   1   5  932.23   39.65
   7  -1  -4  119.07    7.04
   7  -1  -4  117.13    6.84
   7   1  -4  105.02    7.31
   7  -1  -4  106.93    7.26
  -7   1   4  119.50    6.64
   7   1  -3  938.72   41.04
   7  -1  -3  953.19   40.91
   7  -1  -3  934.16   40.74
   7   1  -3  962.53   40.91
  -7   1   3  928.86   40.55
   7   1  -2   85.60    6.54
   7  -1  -2   83.14    6.54
   7  -1  -2   83.81    5.76
   7   1  -2   84.87    6.27
  -7   1   2   80.25    5.45
  -7   1   1   10.84    3.66
   7  -1  -1   11.58    5.32
   7  -1  -1   10.21    3.87
   7   1  -1   13.38    4.83
  -7   1   0  842.21   37.09
   7  -1   0  866.87   37.70
   7  -1   0  850.24   37.24
   7   1   0  867.98   37.45
   7   1   1  105.64    8.59
   7  -1   1  100.75    8.23
   7  -1   1  102.95    7.03
   7   1   1  103.29    7.48
   7   1   2  525.07   24.31
   7  -1   2  514.25   23.23
   7   1   2  504.92   23.52
   7   1   3   70.79    8.68
   7  -1   3   72.13    6.37
   7   1   3   64.93    7.06
   7   1   4  341.70   18.33
   7  -1   4  360.32   18.18
   7  -1   4  359.55   17.16
   7   1   4  366.46   17.54
   7   1   5   25.63    6.97
   7  -1   5   34.83    7.38
   7  -1   5   29.76    5.67
   7   1   5   33.30    6.49
   7   1   6    6.45    6.26
   7  -1   6   10.30    6.65
   7  -1   6   15.28    5.02
   7   1   6   14.11    5.83
   7   1   7   54.75    6.46
   7  -1   7   49.09    7.05
   7  -1   7   40.89    5.67
   7   1   7   43.30    6.52
   7   1   8  118.01    7.99
   7  -1   8  141.48    8.67
   7  -1   8  122.61    7.74
   7   1   8  136.60    8.43
   7   1   9   12.42    3.88
   7  -1   9   10.65    4.76
   7  -1   9   19.90    4.28
   7   1   9   12.72    4.83
   7  -1  10   87.52    5.55
   7  -1  10   81.33    5.38
   7   1  10   97.13    5.94
  -7   1 -11   42.61    3.38
   7   1  11   47.32    3.64
   7   2 -17   10.11    3.01
   7  -2 -17    3.68    2.23
   7  -2 -16    9.36    3.58
   7   2 -16   10.48    4.23
   7   2 -15    2.97    5.26
   7  -2 -15    1.09    4.50
   7   2 -14  125.20    8.61
   7   2 -14  120.78    8.58
   7  -2 -14  130.17    8.19
   7  -2 -13   12.36    6.55
   7   2 -13   22.04    6.51
   7  -2 -13   19.91    5.94
   7   2 -13   17.90    6.19
   7  -2 -12  132.04    8.92
   7   2 -12  136.54    9.30
   7  -2 -12  130.07    9.65
  -7   2  12  122.25    7.85
   7   2 -12  131.61    9.17
  -7   2  11   23.02    4.88
   7  -2 -11   28.08    7.21
   7  -2 -11   37.13    6.60
   7   2 -11   32.66    6.65
   7   2 -11   33.00    6.92
   7   2 -10  244.40   12.89
   7   2 -10  225.34   13.12
   7  -2 -10  238.03   13.13
   7   2 -10  231.91   13.20
   7  -2 -10  238.83   13.30
  -7   2  10  225.68   11.98
  -7   2   9   11.03    5.22
   7   2  -9   17.30    6.65
   7  -2  -9   11.15    7.02
   7   2  -9   14.39    7.23
   7   2  -9    8.53    6.96
   7   2  -8  208.07   11.76
   7   2  -8  225.49   11.66
   7   2  -8  192.12   11.98
   7  -2  -8  196.71   11.76
  -7   2   8  196.53   10.59
   7  -2  -7  122.93    7.52
   7   2  -7  122.16    8.61
   7   2  -7  135.63    8.00
   7   2  -7  112.88    9.20
   7  -2  -7  134.85    8.96
  -7   2   7  129.82    7.84
   7  -2  -6  513.88   23.79
   7   2  -6  550.80   24.35
   7   2  -6  548.64   24.25
   7  -2  -6  520.71   23.67
   7  -2  -6  561.00   24.44
  -7   2   6  547.82   23.95
   7  -2  -5  223.73   11.30
   7   2  -5  246.65   12.22
   7   2  -5  236.42   12.04
   7  -2  -5  239.92   12.19
  -7   2   5  241.59   11.60
   7  -2  -4  340.08   15.24
   7  -2  -4  313.51   14.96
   7   2  -4  344.05   15.72
   7   2  -4  324.06   15.49
  -7   2   4  321.90   15.18
   7  -2  -3   86.13    6.18
   7  -2  -3   84.62    5.51
   7   2  -3   78.73    6.74
  -7   2   3   80.96    5.78
   7  -2  -2   72.63    6.01
   7  -2  -2   65.66    4.99
   7   2  -2   64.63    6.19
  -7   2   2   63.89    5.27
  -7   2   1  563.53   24.08
   7   2  -1  555.88   24.68
   7  -2  -1  535.36   24.39
   7  -2  -1  516.81   23.81
   7   2  -1  540.67   24.38
  -7   2   0    8.86    4.50
   7   2   0   10.77    6.28
   7  -2   0   11.67    5.84
   7  -2   0    8.84    3.95
   7   2   0   13.37    5.42
  -7   2  -1 1140.95   49.00
   7   2   1 1152.08   49.83
   7  -2   1 1169.51   49.56
   7  -2   1 1092.36   48.84
   7   2   1 1141.14   49.36
   7   2   2   40.61    7.76
   7  -2   2   34.39    4.94
   7   2   2   50.47    6.70
   7   2   3 1115.56   48.42
   7  -2   3 1045.86   46.90
   7   2   3 1118.28   47.49
   7   2   4   13.63    8.57
   7  -2   4    0.47    4.49
   7   2   4    6.53    6.75
   7   2   5    1.39    7.12
   7  -2   5   -1.77    4.15
   7   2   5    2.25    6.42
   7   2   6   25.78    6.84
   7  -2   6   37.91    4.81
   7   2   6   29.65    6.46
   7   2   7  364.89   17.83
   7  -2   7  385.69   18.29
   7  -2   7  361.28   17.07
   7   2   7  377.61   17.87
  -7  -2  -7  363.07   16.77
   7   2   8    5.16    4.24
   7  -2   8    2.95    5.61
   7  -2   8    7.42    3.88
   7   2   8    6.85    5.42
   7  -2   9  435.63   18.47
   7   2   9  462.64   18.60
   7  -2  10   -0.65    3.57
   7   2  10    2.96    3.73
  -7   2 -11  247.33   10.75
   7   2  11  221.47   10.83
   7   3 -17   15.65    2.65
   7  -3 -16    0.04    2.66
   7   3 -16    4.88    3.65
   7  -3 -16   -4.01    3.86
   7   3 -15   39.38    5.26
   7  -3 -15   37.87    4.38
   7  -3 -15   42.94    5.60
   7   3 -14   -1.23    5.31
   7  -3 -14    0.94    4.61
   7   3 -13   62.47    6.91
   7  -3 -13   51.71    6.21
  -7   3  13   60.67    5.66
  -7   3  12   52.14    5.71
   7   3 -12   55.29    6.90
   7  -3 -12   53.26    6.41
   7   3 -12   54.53    7.22
  -7   3  11    1.87    4.83
   7  -3 -11    9.73    5.73
   7  -3 -11   -5.06    6.91
   7   3 -11    9.90    6.10
   7   3 -11   10.84    6.53
  -7   3  10   37.66    6.06
   7  -3 -10   47.20    7.89
   7  -3 -10   40.53    7.07
   7   3 -10   46.16    6.76
   7   3 -10   42.76    7.65
  -7   3   9    2.34    5.55
   7  -3  -9   -2.10    7.59
   7   3  -9    6.50    5.97
   7   3  -9    2.17    7.32
   7   3  -8  115.91    8.45
   7  -3  -8  122.32    9.44
  -7   3   8  117.46    8.37
  -7   3   7   -5.30    5.26
   7  -3  -7    1.63    6.66
   7   3  -7    3.25    5.83
   7   3  -7    0.41    5.49
   7   3  -6  337.98   16.37
   7  -3  -6  350.42   16.70
  -7   3   6  334.94   16.15
  -7   3   5   35.35    5.29
   7   3  -5   36.35    5.92
   7  -3  -4 2078.64   89.15
  -7   3   4 2113.53   89.31
   7  -3  -3  135.83    7.67
  -7   3   3  130.23    7.84
   7  -3  -2  903.85   39.57
  -7   3   2  913.29   39.53
  -7   3   1   30.12    5.09
   7  -3  -1   28.11    5.27
  -7   3   0 1733.94   74.17
   7   3   0 1759.32   74.86
   7  -3   0 1707.81   74.38
  -7   3  -1   11.21    5.55
   7   3   1   15.77    7.31
   7   3   2 1482.69   65.36
   7   3   3   54.54    9.82
   7   3   4  268.49   16.27
   7   3   5    7.96    7.41
   7   3   6  420.72   20.40
   7   3   7   26.29    4.98
   7  -3   8  348.35   16.93
   7  -3   9    9.81    4.44
  -7   3 -10  291.97   13.02
   7  -3  10  269.42   13.02
  -7   3 -11    2.74    2.16
   7  -4 -16   99.03    5.66
   7   4 -16   90.72    5.52
   7  -4 -15   25.80    3.42
   7  -4 -15   32.72    4.74
   7   4 -14    9.82    5.01
   7  -4 -14   14.04    3.92
   7  -4 -14   11.48    5.40
  -7   4  13   59.05    5.95
   7   4 -13   63.48    6.50
   7  -4 -13   57.89    5.91
   7  -4 -13   80.11    7.29
  -7   4  12    2.78    5.06
   7   4 -12    6.96    5.53
   7  -4 -12    1.75    4.80
   7  -4 -11   47.63    5.77
  -7   4  11   30.76    5.91
   7   4 -11   47.97    6.09
   7  -4 -10  140.89    8.92
   7   4 -10  144.04    9.61
  -7   4  10  135.90    9.04
   7   4 -10  140.87    8.98
  -7   4   9    1.78    5.87
   7  -4  -9    8.41    7.43
   7   4  -9    5.13    6.78
   7   4  -8   91.85    7.22
   7   4  -8   81.27    7.97
   7  -4  -8   98.83    8.93
  -7   4   8   84.41    7.71
   7   4  -7   56.20    6.22
  -7   4   7   60.64    6.80
   7  -4  -7   60.42    8.19
   7   4  -7   51.14    7.27
   7   4  -6  246.86   12.41
   7   4  -6  247.85   13.26
   7  -4  -6  243.73   13.46
  -7   4   6  241.85   12.72
   7   4  -5  329.54   15.83
   7   4  -5  352.75   16.51
  -7   4   5  320.33   15.97
  -7   4   4   49.86    6.12
   7   4  -4   48.10    6.49
   7   4  -4   47.27    6.15
   7  -4  -3  561.83   24.89
   7   4  -3  565.96   25.60
   7   4  -3  576.71   25.63
  -7   4   3  545.82   25.22
   7  -4  -2  131.60    7.99
   7   4  -2  133.20    8.84
   7   4  -2  136.12    9.16
  -7   4   2  143.54    8.54
  -7   4   1   17.63    5.40
   7  -4  -1   16.49    5.30
   7   4  -1   23.58    5.96
   7   4  -1   16.03    6.60
  -7   4   0  158.46    9.65
   7  -4   0  158.42    9.41
   7   4   0  164.77   10.34
  -7   4  -1    0.51    5.96
   7   4   1    5.68    6.91
  -7   4  -2  362.36   17.63
   7   4   2  360.53   18.05
  -7   4  -3  193.92   10.87
   7   4   3  164.65   11.22
   7   4   4  485.71   23.07
   7   4   5  374.08   18.54
   7   4   6   27.01    6.52
   7   4   7  335.94   16.49
  -7   4  -8    4.68    4.51
   7  -4   8    6.30    5.74
   7   4   8    3.66    4.86
  -7   4  -9  279.74   13.20
   7  -4   9  280.60   13.51
   7   4   9  277.83   13.49
  -7   4 -10    4.25    2.96
   7  -4  10    3.50    3.12
   7   4  10   -1.70    3.25
   7  -5 -16   37.41    3.13
   7   5 -15   72.05    4.97
   7  -5 -15   79.85    5.43
   7   5 -14   26.82    4.49
   7  -5 -14   30.18    4.94
   7  -5 -13  287.86   13.20
   7   5 -13  256.99   12.70
  -7   5  13  276.02   12.84
  -7   5  12   -0.17    5.10
   7  -5 -12    6.52    6.21
   7   5 -12    7.08    5.08
   7  -5 -12    6.66    4.19
   7  -5 -11  185.57   10.36
   7  -5 -11  214.85   11.76
   7   5 -11  198.22   10.89
  -7   5  11  206.78   11.16
   7   5 -10  114.32    7.98
  -7   5  10  125.78    8.61
   7   5  -9  443.90   20.60
   7   5  -9  426.90   20.21
  -7   5   9  438.03   20.58
  -7   5   8    4.37    6.39
   7   5  -8    1.35    6.68
   7   5  -8    3.14    4.94
   7   5  -7  451.07   21.16
  -7   5   7  435.35   21.00
   7   5  -6  127.99    9.81
   7  -5  -6  151.07   10.32
  -7   5   6  127.46    9.16
   7   5  -5  114.86    8.61
   7   5  -5  114.90    8.77
  -7   5   5  118.22    8.63
  -7   5   4   51.91    6.76
   7   5  -4   48.60    7.24
   7   5  -4   51.05    6.70
   7   5  -3  130.02    9.03
   7   5  -3  113.50    8.69
  -7   5   3  118.92    8.60
   7  -5  -2  295.92   15.20
   7   5  -2  335.44   16.34
   7   5  -2  344.77   16.64
  -7   5   2  341.86   16.02
   7  -5  -1  163.16    9.94
   7   5  -1  182.72   10.78
   7   5  -1  186.42   11.28
  -7   5   1  196.87   10.71
  -7   5   0  991.11   42.33
   7  -5   0  958.64   42.22
   7   5   0  967.66   42.46
   7   5   0  924.17   43.22
  -7   5  -1   57.76    7.35
   7   5   1   46.62    7.47
  -7   5  -2 2133.98   99.72
   7   5   2 2148.66   99.94
  -7   5  -3  305.62   16.30
   7   5   3  309.06   16.67
  -7   5  -4 1675.54   63.71
   7   5   4 1611.06   64.05
  -7   5  -5  234.95   12.90
   7   5   5  247.51   13.22
   7   5   6  533.35   24.59
   7   5   7    0.63    5.20
   7   5   8  145.01    8.53
   7   5   9   83.38    5.79
   7  -5  10    1.86    2.46
   7   5  10    3.10    2.52
   7  -6 -15   -1.50    2.79
   7  -6 -14  350.40   16.06
   7  -6 -13   10.20    4.70
  -7   6  13   -1.60    4.36
   7   6 -13    5.51    3.70
   7  -6 -12  412.31   18.23
  -7   6  12  421.62   18.14
  -7   6  11   10.09    5.69
   7  -6 -11   15.62    6.04
   7  -6 -11   12.98    3.76
   7  -6 -10  844.25   34.78
  -7   6  10  823.42   34.61
  -7   6   9   -2.84    6.14
   7  -6  -9    3.16    7.05
   7  -6  -9   -2.25    4.39
   7   6  -9    1.13    5.84
   7   6  -8  512.31   23.79
  -7   6   8  515.02   23.82
  -7   6   7   41.58    7.01
   7   6  -7   44.15    6.72
  -7   6   6   42.55    7.00
   7   6  -6   53.43    7.17
   7   6  -5  120.38    8.60
  -7   6   5  121.27    9.07
   7   6  -4  360.40   17.46
   7   6  -4  348.33   17.55
  -7   6   4  352.95   17.57
  -7   6   3   67.71    7.80
   7   6  -3   64.27    7.60
   7   6  -3   68.29    7.76
   7   6  -2 1560.16   69.00
   7   6  -2 1595.90   69.37
  -7   6   2 1636.85   68.93
   7  -6  -1  140.90    8.53
   7   6  -1  156.44    9.95
   7   6  -1  157.56   10.92
  -7   6   1  163.54   10.04
   7  -6   0  379.70   17.66
   7   6   0  365.43   18.27
   7   6   0  341.52   19.17
  -7   6   0  399.68   18.30
   7   6   1  183.97    9.96
   7   6   1  107.63   10.47
   7   6   2  132.76    8.77
   7   6   2   65.25    8.26
   7   6   3   26.85    6.72
   7   6   3   15.03    5.64
   7   6   4    4.81    6.47
   7   6   5   52.30    7.06
   7   6   6   25.19    6.13
   7   6   7    0.09    4.76
  -7   6  -8  143.81    7.57
   7  -6   8  139.80    7.81
   7   6   8  129.21    7.80
  -7   6  -9    5.68    2.73
   7  -6   9    4.43    3.09
   7   6   9    0.18    2.79
   7  -7 -14    8.96    2.74
   7  -7 -13   71.89    5.21
  -7   7  13   72.29    5.34
  -7   7  12   -1.72    4.72
   7  -7 -12    5.19    4.57
   7  -7 -11  476.40   21.61
  -7   7  11  463.85   21.54
  -7   7  10   30.56    6.09
   7  -7 -10   30.49    6.32
   7  -7  -9  720.29   32.05
  -7   7   9  705.35   31.89
   7   7  -8  116.54    8.10
   7  -7  -8  113.71    8.98
  -7   7   8  112.41    8.83
  -7   7   7    6.86    6.32
   7  -7  -7   -1.21    7.26
   7   7  -7    0.09    5.50
  -7   7   6   16.56    6.50
   7  -7  -6   17.07    7.27
   7   7  -6   12.29    5.66
  -7   7   5    8.78    6.38
   7   7  -5    9.72    5.59
   7   7  -4   35.48    6.08
   7   7  -3  100.97    7.75
   7   7  -2   66.10    6.74
   7   7  -1  967.57   42.63
   7   7   0   -0.11    5.57
   7   7   0    0.29    5.97
   7  -7   1   37.31    5.03
   7   7   1   45.23    6.57
   7   7   1   27.97    6.02
   7   7   2   74.65    7.60
  -7   7  -3    1.53    5.89
   7   7   3    1.28    6.31
  -7   7  -4   17.20    5.92
   7   7   4   19.95    6.56
  -7   7  -5    9.70    5.00
   7   7   5    0.35    6.11
  -7   7  -6   13.51    4.59
   7   7   6    3.80    5.30
  -7   7  -7   34.89    4.15
   7  -7   7   26.81    4.33
   7   7   7   38.11    4.74
   7  -7   8   43.43    3.94
   7   7   8   32.43    3.56
   7  -8 -13    1.58    2.51
   7  -8 -12   22.68    3.85
  -7   8  12   24.68    4.20
  -7   8  11   31.26    4.85
   7  -8 -11   27.78    4.67
   7  -8 -10  142.83    8.45
  -7   8  10  133.28    8.56
   7  -8  -9  150.80    9.22
   7  -8  -8  174.44   10.41
   7   8  -7  101.13    7.16
   7  -8  -7   95.28    8.29
   7  -8  -6   63.46    7.44
   7   8  -6   62.20    6.10
   7   8  -5   98.95    7.31
   7   8  -4  153.88    9.22
   7   8  -3   41.52    5.81
   7   8  -2  244.94   13.25
  -7   8   2  274.68   13.93
  -7   8   1    4.04    6.39
   7   8  -1    1.80    5.34
  -7   8   0    4.86    6.05
   7   8   0    1.82    5.46
   7   8   1  424.41   20.96
  -7   8  -1  446.99   20.54
  -7   8  -2   -2.58    5.57
   7  -8   2   -0.93    3.74
   7   8   2   -1.75    6.33
   7  -8   3  185.44    9.86
   7   8   3  166.74   11.74
  -7   8  -4   -3.04    4.74
   7  -8   4    1.94    3.96
   7   8   4    8.37    6.63
   7  -8   5  225.93   11.15
   7   8   5  205.68   12.33
  -7   8  -5  247.88   11.46
  -7   8  -6    1.04    3.55
   7  -8   6    0.66    3.13
   7   8   6   -3.21    4.05
   7  -8   7   82.93    5.06
  -7   8  -7  100.25    5.23
   7  -9 -11   34.16    3.61
   7  -9 -10   53.33    4.78
   7  -9  -9   43.29    5.06
   7  -9  -8   17.91    5.14
  -7   9   7   28.51    5.90
   7  -9  -7   24.36    5.91
   7  -9  -6  117.03    8.15
  -7   9   6  126.77    8.04
  -7   9   5    8.64    5.97
   7  -9  -5    6.59    6.15
   7   9  -5    6.30    4.12
   7   9  -4  109.47    7.57
  -7   9   4  150.39    9.04
  -7   9   3   31.68    6.06
   7   9  -3   23.80    4.86
   7   9  -2  246.25   13.65
  -7   9   2  315.00   14.21
  -7   9   1    5.46    5.81
   7   9  -1    3.66    5.12
  -7   9   0   24.41    5.62
   7   9   0   15.11    5.53
  -7   9  -1   58.85    6.11
   7   9   1   33.73    6.53
  -7   9  -2  189.20   10.21
  -7   9  -3   10.53    4.37
  -7   9  -4  179.31    9.21
  -7   9  -5   10.38    3.33
  -7   9  -6   79.95    4.62
  -7  10  11   42.12    3.15
  -7  10  10   22.03    3.23
   7 -10  -9   49.07    4.16
  -7  10   9   68.72    4.82
  -7  10   8   12.03    4.01
   7 -10  -8    3.79    3.62
  -7  10   7   31.49    4.78
   7 -10  -7   31.28    4.62
  -7  10   6    8.38    4.56
   7 -10  -6    6.67    4.65
   7 -10  -5  235.02   12.36
  -7  10   5  258.73   12.40
  -7  10   4   19.60    4.98
   7 -10  -4   16.32    5.30
  -7  10   3  250.00   12.56
  -7  10   2    7.34    4.74
  -7  10   1  144.99    8.50
  -7  10   0    2.90    4.17
  -7  10  -1   87.66    6.09
  -7  10  -2   35.07    4.22
  -7  10  -3   35.99    3.76
  -7  10  -4    0.69    2.58
  -7  11   8    3.68    2.45
  -7  11   7   19.67    3.09
   7 -11  -7   14.75    2.69
  -7  11   6   -1.28    3.15
   7 -11  -6    1.10    2.95
  -7  11   5    1.72    3.37
   7 -11  -5    0.70    3.28
  -7  11   4   44.11    4.22
   7 -11  -4   43.41    4.40
  -7  11   3   18.53    3.65
   7 -11  -3   15.93    3.98
   7 -11  -2  127.74    7.09
  -7  11   2  116.25    6.70
  -7  11   1   13.52    3.24
  -7  11   0   53.70    4.20
  -7  11  -1   -0.66    2.59
   8   0 -17   -0.25    2.55
   8   0 -16  274.59   12.94
   8   0 -15    4.54    4.83
   8   0 -15   -0.72    4.61
   8   0 -14  139.97    8.87
   8   0 -13   -3.95    5.89
   8   0 -12  113.94    8.49
   8   0 -11    0.40    5.91
   8   0 -10   52.86    7.03
   8   0 -10   71.22    8.07
   8   0  -9   -3.72    6.27
   8   0  -9    0.96    5.51
   8   0  -8 1469.64   63.66
   8   0  -8 1482.87   63.39
   8   0  -8 1474.47   63.82
   8   0  -7   -3.59    5.86
   8   0  -7    1.13    5.49
   8   0  -7    0.83    4.79
   8   0  -6  671.99   30.19
   8   0  -6  696.71   30.14
   8   0  -6  669.29   30.39
   8   0  -5   -3.71    5.29
   8   0  -5    2.55    5.31
   8   0  -5    2.66    4.96
   8   0  -4  310.00   15.00
   8   0  -3    0.86    5.17
   8   0  -3   -0.92    5.09
   8   0  -2   18.03    6.16
   8   0  -2   18.33    5.41
   8   0  -1   -2.77    6.59
   8   0  -1    3.11    5.09
   8   0   0    2.32    5.02
  -8   0  -1   -1.13    4.01
   8   0   1   -3.55    5.50
  -8   0  -2    6.76    4.05
   8   0   2    7.75    6.52
   8   0   2   14.94    5.23
   8   0   3   -0.55    6.95
   8   0   3   -1.27    5.22
   8   0   4  208.67   12.40
   8   0   4  226.83   11.69
   8   0   5    3.07    5.87
   8   0   5    0.09    4.86
   8   0   6  141.85    9.29
   8   0   6  147.11    8.61
   8   0   7   -5.74    5.04
   8   0   7    1.95    4.38
   8   0   8    6.05    4.09
   8   0   8    5.64    3.77
  -8   0  -9   -0.11    2.30
   8   0   9    2.49    2.78
   8   0   9    0.65    3.00
   8  -1 -17  102.23    5.28
   8  -1 -16   54.80    4.74
   8  -1 -16   54.78    4.60
   8  -1 -15  351.85   16.46
   8  -1 -15  348.77   16.34
   8   1 -14    6.94    5.62
   8  -1 -14   11.62    5.62
   8   1 -14   12.85    5.24
   8  -1 -14    7.43    5.51
   8   1 -13   44.11    6.82
   8  -1 -13   36.34    6.49
   8   1 -13   41.75    6.31
   8  -1 -13   42.88    6.39
   8  -1 -12    4.64    6.29
   8   1 -12    3.13    6.30
   8  -1 -12    4.34    6.52
   8   1 -12    2.10    5.84
   8  -1 -11   31.77    6.78
   8   1 -11   23.85    6.83
   8   1 -11   25.14    6.11
   8   1 -10   -2.00    5.94
   8  -1 -10   -0.10    6.36
   8   1 -10    3.64    6.70
   8   1 -10   -2.79    6.28
   8   1  -9    7.80    6.15
   8  -1  -9   -4.59    6.31
   8   1  -9    0.18    6.19
   8   1  -9   -2.21    7.00
   8   1  -8   49.57    7.00
   8  -1  -8   49.73    7.40
   8  -1  -8   46.29    6.04
   8   1  -8   54.71    7.18
   8   1  -8   39.43    5.31
   8  -1  -8   41.57    4.79
   8  -1  -7  225.57   12.06
   8   1  -7  243.49   12.71
   8   1  -7  223.64   12.10
   8  -1  -7  236.26   11.58
   8   1  -7  232.61   12.86
   8  -1  -7  235.12   12.65
   8  -1  -6  460.97   21.57
   8   1  -6  477.73   21.96
   8   1  -6  487.39   21.83
   8  -1  -6  485.59   21.53
   8  -1  -6  464.59   21.93
   8  -1  -5  239.34   12.04
   8   1  -5  244.88   12.57
   8   1  -5  242.84   12.35
   8  -1  -5  236.13   12.00
   8  -1  -5  233.63   12.45
   8  -1  -4  269.25   13.21
   8  -1  -4  259.12   12.95
   8   1  -4  272.45   13.44
   8   1  -4  254.37   13.45
   8  -1  -4  262.57   13.17
  -8   1   3   31.23    4.33
   8  -1  -3   24.28    5.19
   8  -1  -3   27.71    5.70
   8  -1  -3   25.73    4.86
   8   1  -3   34.64    5.92
   8   1  -2  406.89   18.83
   8  -1  -2  386.02   18.48
   8  -1  -2  384.95   17.97
   8   1  -2  384.85   18.34
  -8   1   2  388.04   17.65
  -8   1   1    5.19    4.07
   8  -1  -1    4.64    6.31
   8  -1  -1    5.43    4.64
   8   1  -1   -0.76    5.64
  -8   1   0  572.79   25.51
   8  -1   0  597.00   26.35
   8  -1   0  568.79   25.78
   8   1   0  562.15   26.00
  -8   1  -1   65.88    5.82
   8   1   1   73.95    8.53
   8  -1   1   73.65    6.56
   8  -1   1   72.38    8.36
   8   1   1   73.74    7.25
  -8   1  -2  330.23   16.26
   8   1   2  357.92   17.89
   8  -1   2  346.53   16.50
   8   1   2  363.68   16.97
   8   1   3   72.98    7.84
   8  -1   3   73.14    6.24
   8   1   3   67.76    7.04
   8   1   4    2.63    6.53
   8  -1   4    0.21    6.50
   8  -1   4    6.73    4.38
   8   1   4   10.02    5.20
   8   1   5  301.67   15.50
   8  -1   5  299.32   15.47
   8  -1   5  298.53   14.64
   8   1   5  319.94   15.20
   8   1   6    4.73    5.33
   8  -1   6   -2.89    6.08
   8  -1   6    3.35    4.10
   8   1   6   11.37    5.20
   8   1   7  216.54   11.46
   8  -1   7  241.76   11.67
   8  -1   7  202.90   10.92
   8   1   7  232.73   11.55
  -8   1  -8    1.09    3.54
   8   1   8    0.85    3.64
   8  -1   8   -0.61    4.26
   8  -1   8    3.41    3.26
   8   1   8   10.03    4.22
  -8   1  -9   79.44    4.52
   8  -1   9   80.48    4.79
   8   1   9   81.26    4.91
   8   2 -17   49.79    3.43
   8  -2 -16   60.91    4.70
   8   2 -16   55.88    4.60
   8  -2 -16   47.56    4.10
   8  -2 -15  143.68    8.39
   8   2 -15  143.14    8.29
   8  -2 -15  144.50    8.04
   8  -2 -14  213.58   11.16
   8   2 -14  195.67   10.97
   8  -2 -14  205.70   10.84
   8   2 -13  174.66   10.62
   8  -2 -13  194.85   11.05
   8   2 -13  200.34   10.94
   8  -2 -13  192.52   10.79
   8  -2 -12   13.48    6.47
   8   2 -12   11.55    5.95
   8  -2 -12   14.86    5.97
   8   2 -12   15.63    5.82
  -8   2  11   44.49    4.86
   8  -2 -11   41.65    7.17
   8  -2 -11   58.25    7.24
   8   2 -11   57.07    6.91
   8   2 -11   48.56    6.64
  -8   2  10   25.21    4.50
   8  -2 -10   23.24    6.63
   8   2 -10   17.09    6.74
   8  -2 -10   23.87    7.22
   8   2 -10   15.38    6.20
   8   2 -10   27.94    6.35
   8  -2  -9   68.04    7.53
   8   2  -9   68.86    7.32
   8   2  -9   57.24    7.52
  -8   2   9   61.58    5.73
   8   2  -9   70.07    7.78
  -8   2   8    0.96    4.75
   8  -2  -8    2.23    6.65
   8  -2  -8    4.77    4.57
   8   2  -8    2.08    6.87
  -8   2   7   28.14    5.03
   8  -2  -7   32.93    6.83
   8  -2  -7   20.04    4.78
   8   2  -7   33.21    7.29
   8   2  -7   30.47    5.80
  -8   2   6   11.94    4.73
   8  -2  -6   14.33    6.36
   8  -2  -6   14.77    4.56
   8   2  -6   17.31    6.67
   8   2  -6   14.20    5.93
   8  -2  -6   16.97    4.20
   8  -2  -5  731.62   34.20
   8   2  -5  809.40   34.99
   8   2  -5  813.05   34.88
   8  -2  -5  799.13   34.79
  -8   2   5  802.35   34.34
  -8   2   4    4.17    4.46
   8  -2  -4    4.33    5.70
   8  -2  -4    7.24    4.73
   8  -2  -4    1.77    4.13
   8   2  -4    2.89    5.57
   8   2  -4   -0.99    5.96
   8  -2  -3  644.83   28.24
   8  -2  -3  606.43   27.77
   8   2  -3  656.35   28.48
  -8   2   3  635.00   27.92
  -8   2   2    2.03    4.37
   8  -2  -2    2.02    5.28
   8  -2  -2    2.77    4.10
   8   2  -2    1.31    5.98
   8   2  -1 1021.69   45.24
   8  -2  -1  998.59   44.87
   8  -2  -1 1008.22   44.37
   8   2  -1 1071.60   45.01
  -8   2   1 1043.88   44.51
  -8   2   0  126.00    7.96
   8   2   0  128.36   10.04
   8  -2   0  134.35    9.25
   8  -2   0  115.15    7.31
   8   2   0  120.96    9.10
  -8   2  -1  848.46   38.21
   8   2   1  929.71   39.44
   8  -2   1  903.48   38.89
   8  -2   1  821.35   37.96
   8   2   1  927.52   38.80
  -8   2  -2   23.51    5.27
   8   2   2   22.42    7.96
   8  -2   2   31.59    7.12
   8  -2   2   24.54    4.51
   8   2   2   21.23    6.74
  -8   2  -3  514.39   22.89
   8   2   3  540.22   24.33
   8  -2   3  473.42   22.59
   8   2   3  520.14   23.55
  -8   2  -4    0.08    4.73
   8   2   4    2.80    6.74
   8  -2   4   -0.59    3.77
   8   2   4    5.05    5.87
   8   2   5   90.39    8.04
   8  -2   5   98.66    8.31
   8  -2   5   89.95    6.08
   8   2   5   99.86    7.73
   8   2   6    4.03    5.46
   8  -2   6   -3.41    5.98
   8  -2   6   -0.64    3.58
   8   2   6    9.72    5.60
  -8   2  -7  151.60    8.48
   8   2   7  145.28    8.58
   8  -2   7  162.00    9.22
   8   2   7  165.78    9.16
  -8   2  -8   16.30    3.60
   8  -2   8   10.93    4.40
   8   2   8   11.19    4.26
  -8   2  -9  147.09    6.97
   8   2   9  141.39    7.26
   8   2  10   21.80    2.38
   8   3 -16   52.04    3.96
   8  -3 -16   41.43    3.29
   8   3 -15    3.89    3.97
   8  -3 -15    2.49    3.42
   8  -3 -14   99.36    7.21
   8   3 -14   94.34    6.80
   8  -3 -14   96.24    6.58
   8  -3 -13    8.79    6.07
   8   3 -13    1.16    5.27
   8  -3 -13    9.91    4.98
   8  -3 -12  324.34   15.19
   8  -3 -12  323.58   15.57
   8   3 -12  329.08   15.33
  -8   3  11   22.34    4.85
   8  -3 -11   20.35    6.62
   8  -3 -11   25.25    6.15
   8   3 -11   25.02    5.79
   8   3 -11   18.17    6.52
   8   3 -10  466.14   22.18
   8   3 -10  479.70   22.66
   8  -3 -10  530.73   22.59
   8   3 -10  424.45   22.93
   8  -3 -10  524.94   22.70
  -8   3  10  458.47   21.76
  -8   3   9    7.95    5.00
   8  -3  -9    7.21    6.83
   8   3  -9    6.37    6.73
   8   3  -9   10.81    5.78
   8   3  -8  531.67   24.52
   8   3  -8  533.13   24.90
   8  -3  -8  538.83   24.82
  -8   3   8  531.06   24.16
   8   3  -7  190.68   11.11
   8   3  -7  204.51   11.88
   8   3  -7  181.64   10.99
   8  -3  -7  198.35   11.65
  -8   3   7  197.17   10.66
   8   3  -6  433.01   20.74
   8   3  -6  455.97   20.77
   8  -3  -6  441.86   20.78
  -8   3   6  419.73   20.08
   8   3  -5  523.59   23.50
   8   3  -5  503.61   23.42
   8  -3  -5  511.79   23.44
  -8   3   5  484.00   22.85
   8  -3  -4  556.57   25.39
   8   3  -4  576.82   26.07
  -8   3   4  579.13   25.57
  -8   3   3    3.22    5.07
   8  -3  -3    3.98    5.02
   8   3  -3    7.27    5.96
   8  -3  -2  725.15   32.74
   8   3  -2  755.75   33.22
   8   3  -2  770.65   33.30
  -8   3   2  724.06   32.59
   8  -3  -1  316.65   15.56
   8   3  -1  317.71   15.89
  -8   3   1  308.48   15.14
  -8   3   0  549.22   25.12
   8  -3   0  557.79   25.38
   8   3   0  561.98   25.75
  -8   3  -1  370.51   17.36
   8   3   1  370.01   18.99
   8  -3   1  353.87   17.80
   8   3   1  357.47   17.85
  -8   3  -2  599.31   27.74
   8   3   2  629.57   29.51
   8  -3   2  650.93   28.24
   8   3   2  603.89   28.19
  -8   3  -3   20.91    5.35
   8   3   3   25.83    8.14
   8  -3   3   22.33    6.69
   8   3   3   21.44    6.69
  -8   3  -4   21.45    5.16
   8   3   4   25.56    7.28
   8  -3   4   21.54    6.56
   8   3   4   32.08    6.35
  -8   3  -5    0.32    4.75
   8   3   5    8.93    6.05
   8   3   5    3.89    5.79
  -8   3  -6  214.00   11.05
   8   3   6  212.94   11.46
  -8   3  -7   -0.39    4.12
   8  -3   7    3.15    4.99
   8   3   7    3.29    4.89
  -8   3  -8  241.32   11.47
   8  -3   8  244.84   11.81
   8   3   8  234.72   11.73
  -8   3  -9   13.68    2.80
   8  -3   9   13.33    3.13
   8   3   9   13.55    3.19
   8  -4 -16   22.88    3.04
   8  -4 -15    2.26    2.52
   8   4 -15    9.22    3.36
   8  -4 -15    4.48    3.88
   8   4 -14   50.48    4.93
   8  -4 -14   50.03    4.42
  -8   4  13    8.36    3.99
   8   4 -13    1.14    4.71
   8  -4 -13    1.80    4.15
  -8   4  12   -2.97    4.66
   8   4 -12    4.13    5.12
   8  -4 -12    1.67    4.87
   8  -4 -11  359.08   16.87
   8  -4 -11  386.94   17.57
  -8   4  11  336.48   16.59
   8   4 -11  332.48   16.86
  -8   4  10    6.42    5.14
   8  -4 -10    3.83    6.89
   8  -4 -10    5.63    5.79
   8   4 -10    6.19    5.22
   8   4  -9  296.22   14.75
   8  -4  -9  314.75   15.64
  -8   4   9  288.48   14.62
  -8   4   8   10.86    5.21
   8  -4  -8   10.72    7.03
   8   4  -8   11.37    5.10
   8   4  -7  154.04    9.69
   8  -4  -7  170.89   10.85
  -8   4   7  173.83    9.77
  -8   4   6   27.26    5.87
   8   4  -6   26.70    5.71
   8  -4  -6   34.65    7.35
  -8   4   5    2.00    5.61
   8  -4  -5    3.74    6.69
   8   4  -4  512.70   24.61
  -8   4   4  545.28   24.21
  -8   4   3    8.26    5.65
   8  -4  -3    3.58    4.40
   8   4  -3    3.06    6.68
   8  -4  -2   94.55    7.27
   8   4  -2  111.49    9.28
  -8   4   2   98.19    7.68
   8  -4  -1  142.04    9.37
   8   4  -1  169.32   11.29
  -8   4   1  160.12    9.61
   8  -4   0  120.49    8.46
   8   4   0  128.55   10.68
  -8   4   0  119.66    8.37
  -8   4  -1  703.94   30.88
   8  -4   1  697.20   30.97
   8   4   1  648.73   32.50
  -8   4  -2   53.84    6.29
   8  -4   2   56.50    6.75
   8   4   2   46.07    9.44
  -8   4  -3  430.91   19.58
   8  -4   3  401.05   19.92
   8   4   3  402.07   21.47
  -8   4  -4    2.03    5.43
   8  -4   4    3.43    6.35
   8   4   4    3.62    6.63
  -8   4  -5  560.01   24.27
   8  -4   5  563.25   24.72
   8   4   5  488.10   24.43
  -8   4  -6    3.23    4.49
  -8   4  -7  411.14   18.65
  -8   4  -8   31.00    3.81
   8  -4   8   27.43    4.17
  -8   4  -9  135.62    6.40
   8  -4   9  121.23    6.45
   8  -5 -15   61.50    4.53
   8   5 -14    5.21    3.16
   8  -5 -14    5.97    4.21
   8   5 -13  107.79    7.05
  -8   5  13  128.30    7.13
   8  -5 -13  115.59    6.71
   8  -5 -12   75.97    5.52
   8   5 -12   64.46    5.87
  -8   5  12   67.83    5.87
   8  -5 -11  325.35   15.41
   8   5 -11  308.84   15.54
  -8   5  11  339.81   15.63
   8  -5 -10  253.61   13.11
   8   5 -10  276.90   13.94
   8   5 -10  242.56   13.09
  -8   5  10  279.20   13.30
  -8   5   9   55.85    6.41
   8  -5  -9   60.24    7.90
   8   5  -9   50.83    7.40
   8   5  -9   46.48    5.73
   8   5  -8  194.39   11.32
   8  -5  -8  195.90   11.69
  -8   5   8  180.18   10.69
  -8   5   7   16.34    5.82
   8  -5  -7   16.58    7.08
   8   5  -7   17.54    6.60
   8   5  -6  772.55   34.35
   8  -5  -6  777.45   34.41
  -8   5   6  750.39   33.94
  -8   5   5    5.46    5.81
   8   5  -5    1.93    6.67
   8   5  -5    6.19    6.64
   8   5  -4 1220.63   52.96
   8   5  -4 1188.67   53.09
  -8   5   4 1226.03   52.70
   8   5  -3  275.83   14.16
   8   5  -3  254.73   14.43
  -8   5   3  262.28   13.68
   8  -5  -2  230.67   12.29
   8   5  -2  271.13   13.84
   8   5  -2  254.54   14.52
  -8   5   2  266.92   13.24
  -8   5   1    6.73    5.51
   8  -5  -1    0.08    4.58
   8   5  -1    1.44    6.48
   8   5  -1   -2.55    7.34
   8  -5   0  228.29   12.23
   8   5   0  240.80   13.07
  -8   5   0  261.33   12.67
   8  -5   1   93.65    7.28
   8   5   1   97.72    7.86
  -8   5  -1  105.46    7.68
  -8   5  -2   21.94    6.04
   8  -5   2   27.96    5.80
   8   5   2   25.99    6.82
   8   5   2    7.85    8.70
  -8   5  -3   18.81    5.61
   8  -5   3   16.58    5.91
   8   5   3   14.82    6.24
   8   5   3   15.13    7.33
  -8   5  -4  496.92   21.85
   8  -5   4  498.95   22.09
   8   5   4  470.32   22.16
   8   5   4  429.44   22.10
  -8   5  -5   54.14    5.86
   8  -5   5   48.18    6.29
   8   5   5   42.35    6.27
  -8   5  -6  181.96    9.44
   8  -5   6  179.30    9.91
   8   5   6  171.77    9.75
  -8   5  -7   48.50    4.51
   8  -5   7   47.95    4.87
   8   5   7   41.05    4.79
  -8   5  -8   73.26    4.59
   8   5   8   68.60    4.75
   8  -6 -14  128.35    6.98
   8  -6 -13   43.41    4.85
  -8   6  13   29.89    4.12
   8  -6 -12  278.00   13.29
  -8   6  12  257.22   12.84
  -8   6  11   -7.20    4.89
   8  -6 -11   -1.76    5.73
   8  -6 -11    0.81    3.54
   8  -6 -10  589.82   27.76
  -8   6  10  690.38   28.30
   8   6  -9   97.28    7.87
   8  -6  -9   89.05    6.76
  -8   6   9   96.85    7.59
   8   6  -8  340.16   16.82
  -8   6   8  338.72   16.62
  -8   6   7   18.37    6.06
   8  -6  -7    7.69    6.89
   8   6  -7   11.32    6.30
   8   6  -6  139.93    9.41
   8  -6  -6  143.55    9.92
  -8   6   6  131.53    9.16
  -8   6   5   45.40    6.74
   8   6  -5   36.82    6.72
  -8   6   4   -1.31    6.15
   8   6  -4   -3.06    6.16
   8   6  -3  155.51    9.96
   8   6  -3  158.52   10.66
  -8   6   3  158.77    9.93
  -8   6   2   17.63    6.22
   8   6  -2   15.50    6.38
   8   6  -2   22.63    7.13
   8  -6  -1   83.24    6.08
   8   6  -1   90.05    7.67
   8   6  -1   87.56    9.55
  -8   6   1  104.40    7.86
   8  -6   0  394.35   17.53
   8   6   0  425.39   18.52
  -8   6   0  433.79   18.29
  -8   6  -1   -5.03    5.88
   8  -6   1   -2.14    4.58
   8   6   1    0.54    6.10
   8   6   1    0.88    7.32
  -8   6  -2   18.86    5.92
   8  -6   2   14.42    4.92
   8   6   2    7.44    6.20
   8   6   2    7.97    6.87
   8  -6   3  191.29   10.63
   8   6   3  205.19   11.50
  -8   6  -3  201.88   11.06
  -8   6  -4   33.77    5.17
   8  -6   4   27.77    5.11
   8   6   4   21.06    5.82
   8  -6   5  157.77    9.07
   8   6   5  166.47    9.33
  -8   6  -5  162.57    9.01
   8  -6   6  238.03   11.71
   8   6   6  239.67   11.80
   8  -6   7   73.03    4.99
   8   6   7   75.13    5.11
   8  -6   8  147.65    6.68
   8   6   8  126.43    6.61
   8  -7 -14    3.53    2.18
   8  -7 -13   65.01    4.68
  -8   7  13   66.67    4.51
  -8   7  12   -2.11    3.77
   8  -7 -12    2.04    4.10
   8  -7 -11  169.78    9.23
  -8   7  11  156.31    8.82
  -8   7  10   12.06    5.01
   8  -7 -10    1.37    5.44
   8  -7  -9  355.92   17.54
  -8   7   9  363.70   17.28
  -8   7   8   64.28    6.91
   8   7  -8   60.32    6.31
  -8   7   7    3.69    5.80
   8   7  -7    2.22    5.47
   8   7  -6  156.66    9.57
  -8   7   6  156.86    9.95
  -8   7   5   -4.10    6.13
   8  -7  -5    8.86    7.00
   8   7  -5   10.73    5.74
   8   7  -4  221.75   12.25
  -8   7   4  235.95   12.54
  -8   7   3   29.70    6.39
   8   7  -3   15.29    5.81
   8   7  -2  125.80    9.00
  -8   7   2  143.44    9.33
  -8   7   1   23.23    6.32
   8   7  -1    8.74    5.81
  -8   7   0   10.46    6.00
   8   7   0   14.69    5.99
   8  -7   1   49.27    4.83
   8   7   1   54.74    6.62
   8  -7   2   58.93    5.33
   8   7   2   68.45    7.25
   8  -7   3   48.82    4.81
   8   7   3   35.90    6.34
   8  -7   4   19.90    4.11
   8   7   4   13.82    5.08
   8  -7   5   76.97    5.29
   8   7   5   76.33    6.09
   8  -7   6    9.45    3.12
   8   7   6    7.06    3.57
   8  -7   7  223.46   10.84
  -8   7  -7  264.42   10.99
   8  -8 -12   59.39    4.27
  -8   8  12   56.33    4.26
  -8   8  11   49.31    4.56
   8  -8 -11   41.81    4.65
   8  -8 -10  251.99   12.96
  -8   8  10  282.33   12.99
   8  -8  -9   75.74    6.51
  -8   8   9   77.62    6.44
  -8   8   8    3.32    5.15
   8  -8  -8    4.33    5.45
   8   8  -7  304.56   15.75
   8  -8  -7  356.01   16.31
  -8   8   7  340.71   16.03
  -8   8   6    5.57    5.63
   8   8  -6   14.50    5.09
   8   8  -5  465.62   22.43
  -8   8   5  523.75   22.82
   8   8  -4    1.71    4.88
   8   8  -3  311.04   15.29
   8   8  -2   88.07    7.47
   8   8  -1   26.22    5.66
   8   8   0    1.32    5.68
   8   8   1  214.86   12.26
   8   8   2    5.38    5.94
   8   8   3   93.17    7.93
  -8   8  -3  119.91    6.97
  -8   8  -4   24.43    4.00
   8  -8   4   14.99    2.70
   8   8   4   18.18    4.84
   8  -8   5   39.06    3.14
   8   8   5   50.41    4.13
  -8   8  -6   15.68    2.44
  -8   9  11    3.69    2.69
   8  -9 -11    3.37    2.47
   8  -9 -10  143.86    7.71
  -8   9  10  159.60    7.82
   8  -9  -9   24.96    4.30
   8  -9  -8  204.93   10.56
   8  -9  -7   55.02    5.71
   8   9  -6  216.38   11.57
   8  -9  -6  272.85   12.42
   8  -9  -5    6.94    5.49
   8   9  -5    2.90    4.08
   8   9  -4  277.81   13.58
   8   9  -3   51.71    5.65
   8   9  -2   85.48    7.00
  -8   9   2  102.25    7.08
  -8   9   1    1.44    4.61
   8   9  -1   -2.62    5.32
   8   9   0  172.46   12.05
  -8   9   0  272.70   11.65
  -8   9  -1   19.39    4.52
  -8   9  -2  128.05    7.29
  -8   9  -3   -3.90    3.29
  -8   9  -4  112.65    5.96
   8 -10  -9   36.89    3.10
  -8  10   8   -2.99    3.04
   8 -10  -8    3.18    3.00
   8 -10  -7   42.32    4.33
  -8  10   7   51.88    4.41
  -8  10   6    6.65    3.75
   8 -10  -6    1.57    3.92
   8 -10  -5  126.09    7.25
  -8  10   5  113.52    7.03
  -8  10   4   46.14    4.90
   8 -10  -4   53.89    5.14
   8 -10  -3  197.11   10.33
  -8  10   3  205.09   10.15
  -8  10   2    5.50    3.81
   8 -10  -2   -2.54    4.27
  -8  10   1  183.21    9.25
  -8  10   0   -3.12    3.41
  -8  10  -1  100.14    5.70
  -8  10  -2    2.95    2.48
  -8  11   6   36.56    2.91
  -8  11   5    1.29    2.31
   8 -11  -5   -1.75    2.33
   8 -11  -4   74.48    4.56
  -8  11   4   77.56    4.46
  -8  11   3   11.54    2.56
   8 -11  -3   12.78    2.82
   8 -11  -2  101.83    5.36
  -8  11   2   92.52    5.09
   8 -11  -1   -1.31    2.34
   9   0 -16  584.41   25.43
   9   0 -15    1.96    3.62
   9   0 -14  249.48   12.28
   9   0 -13    7.80    4.94
   9   0 -12   10.24    6.20
   9   0 -12    9.60    5.26
   9   0 -11    1.80    6.55
   9   0 -11   -7.91    5.35
   9   0 -10  168.11   10.70
   9   0 -10  162.82    9.87
   9   0  -9    5.06    5.33
   9   0  -9   -5.83    5.13
   9   0  -8   28.06    5.80
   9   0  -8   32.42    5.74
   9   0  -8   36.13    4.82
   9   0  -7    0.47    5.26
   9   0  -7    0.52    5.40
   9   0  -7   -1.81    4.25
   9   0  -6   50.46    5.95
   9   0  -6   49.51    5.96
   9   0  -5   10.04    5.16
   9   0  -5    2.52    5.30
   9   0  -4   27.44    5.90
   9   0  -4   21.38    5.92
   9   0  -3   -1.81    5.47
   9   0  -2  170.75   10.38
   9   0  -2  164.62    9.54
   9   0  -1    4.60    6.70
   9   0  -1   -3.70    4.83
   9   0   0  997.66   44.63
   9   0   0 1022.28   44.12
   9   0   1    1.38    4.72
   9   0   2   68.29    6.18
   9   0   3    0.20    6.10
   9   0   3   -1.24    4.67
   9   0   4  126.14    8.38
   9   0   4  116.63    7.44
   9   0   5   -3.74    4.86
   9   0   5    0.57    4.10
   9   0   6  194.95   10.05
   9   0   6  188.99    9.67
   9   0   7    0.40    3.61
   9   0   7    1.98    2.95
   9   1 -16   35.24    3.40
   9  -1 -16   26.29    3.22
   9  -1 -15  124.89    7.28
   9   1 -15  134.30    7.45
   9  -1 -15  130.30    7.33
   9   1 -14  211.62   11.39
   9  -1 -14  229.25   11.66
   9   1 -14  244.23   11.86
   9  -1 -14  256.32   11.90
   9   1 -13    4.61    5.50
   9  -1 -13   -6.60    5.62
   9   1 -13   -1.21    4.64
   9  -1 -13    1.83    5.24
   9   1 -12  239.01   13.10
   9  -1 -12  256.84   13.35
   9  -1 -11   56.29    6.62
   9   1 -11   58.61    7.27
   9   1 -11   52.90    6.20
   9   1 -10  260.65   13.09
   9   1 -10  227.13   12.46
   9   1 -10  223.34   12.45
   9  -1 -10  245.27   12.59
   9  -1  -9   -7.68    5.71
   9   1  -9    4.61    6.40
   9   1  -9    0.46    5.75
   9   1  -9   -4.16    5.25
   9  -1  -8   21.00    5.61
   9  -1  -8   20.54    4.92
   9   1  -8   22.08    6.07
   9   1  -8   17.53    4.54
   9  -1  -8   16.84    3.91
   9  -1  -7  230.70   12.29
   9   1  -7  240.82   12.85
   9   1  -7  243.75   12.57
   9  -1  -7  255.46   12.07
   9  -1  -7  238.23   12.69
   9  -1  -6  248.36   12.67
   9   1  -6  264.33   13.39
   9   1  -6  266.28   13.18
   9  -1  -6  252.00   12.66
   9  -1  -6  243.17   13.02
   9  -1  -5    6.27    5.29
   9  -1  -5    8.79    4.74
   9   1  -5   -0.45    6.02
   9   1  -5    6.50    5.93
   9  -1  -5    6.54    5.03
   9  -1  -4  165.71    9.36
   9   1  -4  155.72   10.09
   9   1  -4  178.21   10.34
   9  -1  -3  250.58   12.96
   9  -1  -3  237.81   12.25
   9   1  -3  250.29   12.96
   9  -1  -2  194.61   10.72
   9  -1  -2  170.26    9.89
   9   1  -2  191.06   10.66
   9  -1  -1  438.06   19.85
   9  -1  -1  403.68   18.97
   9   1  -1  400.12   19.35
   9  -1   0  126.71    8.80
   9  -1   0  121.88    7.52
   9   1   0  130.86    8.39
  -9   1   0  109.25    6.91
  -9   1  -1  446.33   21.26
   9   1   1  510.98   22.70
   9  -1   1  517.01   22.56
   9  -1   1  459.22   21.57
   9   1   1  492.83   22.04
  -9   1  -2    0.07    3.72
   9   1   2    1.53    6.51
   9  -1   2    2.33    4.23
   9   1   2    5.25    5.35
  -9   1  -3  420.46   19.60
   9   1   3  469.07   20.75
   9  -1   3  413.18   19.69
   9   1   3  457.65   20.27
  -9   1  -4   21.60    4.10
   9   1   4   30.93    5.90
   9  -1   4   29.26    6.08
   9  -1   4   21.35    4.21
   9   1   4   33.98    5.22
  -9   1  -5  184.08    9.65
   9   1   5  198.95   10.58
   9  -1   5  215.93   10.90
   9  -1   5  182.59    9.72
   9   1   5  213.68   10.41
  -9   1  -6   11.22    3.14
   9   1   6   12.19    4.27
   9  -1   6    2.57    4.59
   9  -1   6    9.82    3.05
   9   1   6    8.65    3.91
   9  -1   7  140.84    6.92
   9   1   7  131.33    6.70
   9  -1   8    3.56    2.48
   9   1   8    3.55    2.31
   9  -2 -16    4.32    2.33
   9  -2 -16    7.64    2.60
   9   2 -16    5.54    2.63
   9  -2 -15  118.95    6.52
   9   2 -15  110.92    6.48
   9  -2 -15  101.35    6.26
   9   2 -14   11.38    4.50
   9  -2 -14   14.13    4.54
   9  -2 -14   16.13    4.68
   9  -2 -13  395.48   18.10
   9  -2 -13  377.74   18.15
   9   2 -13  388.57   18.16
   9  -2 -12   -4.14    5.65
   9   2 -12    4.70    5.47
   9  -2 -12    0.42    5.60
   9   2 -12    0.17    4.67
   9   2 -11  290.89   13.83
   9  -2 -11  290.70   14.14
   9  -2 -11  272.59   13.86
   9  -2 -10   55.19    6.86
   9   2 -10   58.58    7.11
   9  -2 -10   63.62    7.74
   9   2 -10   63.26    6.92
   9   2  -9  367.84   17.48
   9   2  -9  368.19   17.63
   9  -2  -9  344.17   17.49
   9  -2  -8    0.10    5.65
   9   2  -8   -4.21    6.00
   9   2  -8    6.23    6.35
   9   2  -7  507.64   22.93
   9   2  -7  519.55   22.70
   9  -2  -7  466.07   21.83
   9  -2  -7  487.91   22.73
   9   2  -6  638.41   27.32
   9   2  -6  626.31   27.21
   9  -2  -6  574.56   26.48
   9  -2  -6  608.70   27.05
  -9   2   6  574.33   26.40
   9   2  -5  272.86   13.50
   9   2  -5  269.55   13.33
   9  -2  -5  241.67   12.35
   9  -2  -5  251.67   12.98
  -9   2   5  229.80   12.10
  -9   2   4   35.64    4.73
   9  -2  -4   37.58    5.87
   9   2  -4   30.93    6.92
   9   2  -4   27.34    6.76
   9  -2  -3  427.80   19.15
   9   2  -3  424.64   19.51
   9   2  -3  410.36   19.63
   9  -2  -3  369.75   18.78
  -9   2   3  411.63   18.60
  -9   2   2    2.38    4.12
   9  -2  -2   -2.56    5.54
   9   2  -2   -0.19    5.92
   9  -2  -1  573.93   25.21
   9   2  -1  565.20   25.23
  -9   2   1  525.83   24.44
  -9   2   0   19.44    4.42
   9  -2   0   21.69    6.28
   9   2   0   25.66    6.09
  -9   2  -1  874.95   39.01
   9   2   1  881.63   40.16
   9  -2   1  919.41   39.63
   9   2   1  918.41   39.57
  -9   2  -2    2.71    4.24
   9   2   2    3.67    6.78
   9  -2   2    2.74    5.75
   9   2   2    5.94    5.50
  -9   2  -3   26.46    4.60
   9   2   3   18.61    6.33
   9  -2   3   20.79    6.19
   9   2   3   21.51    5.57
  -9   2  -4  119.29    7.13
   9   2   4  120.60    8.28
   9   2   4  114.73    7.80
  -9   2  -5    2.07    3.87
   9   2   5    7.69    4.77
  -9   2  -6    6.63    3.38
   9  -2   6    6.81    4.33
   9   2   6    8.53    4.08
  -9   2  -7    4.75    2.64
   9  -2   7    5.67    3.66
   9   2   7    5.80    3.34
   9   2   7    2.87    2.45
   9  -2   8   97.58    5.28
   9   2   8   98.15    5.25
   9  -3 -16  127.07    6.26
   9   3 -15    1.67    3.01
   9  -3 -15    2.82    2.79
   9  -3 -15   -4.49    3.39
   9  -3 -14  216.70   10.20
   9   3 -14  186.70    9.85
   9  -3 -14  190.22    9.80
   9  -3 -13   45.13    5.62
   9  -3 -13   37.73    5.04
   9  -3 -12  356.94   16.88
   9  -3 -12  375.04   17.05
   9   3 -12  335.06   16.74
   9  -3 -11   32.17    6.46
   9  -3 -11   35.79    6.14
   9   3 -11   29.84    5.54
   9   3 -10  433.77   20.56
   9   3 -10  480.29   21.00
   9  -3 -10  505.29   21.07
   9  -3 -10  460.77   20.84
  -9   3   9   13.62    4.25
   9  -3  -9    8.07    6.31
   9   3  -9   17.34    6.87
   9   3  -9    6.21    5.37
   9   3  -8  442.93   20.66
   9   3  -8  466.56   21.14
   9  -3  -8  454.16   20.92
  -9   3   8  420.13   20.06
  -9   3   7   36.26    5.05
   9  -3  -7   43.11    6.55
   9   3  -7   52.13    6.08
   9   3  -7   49.10    7.08
   9   3  -7   46.53    6.37
   9   3  -6  594.30   26.48
   9   3  -6  605.51   26.35
   9  -3  -6  569.48   26.17
  -9   3   6  545.94   25.58
   9   3  -5  281.17   14.32
   9   3  -5  301.54   14.33
   9  -3  -5  265.82   13.06
   9  -3  -5  271.71   14.13
  -9   3   5  268.45   13.38
  -9   3   4    0.15    4.41
   9  -3  -4   -0.53    5.45
   9   3  -4    0.59    6.50
  -9   3   3   16.54    4.77
   9  -3  -3   11.47    5.38
   9  -3  -3   11.90    4.85
   9   3  -3   24.35    6.81
  -9   3   2   21.75    4.76
   9  -3  -2   18.32    5.23
   9   3  -2   26.99    6.62
   9   3  -2   23.68    7.08
  -9   3   1   26.58    4.79
   9  -3  -1   27.94    5.58
   9   3  -1   27.11    6.45
   9   3  -1   30.11    7.36
   9  -3   0  360.36   17.52
   9   3   0  363.08   17.89
   9   3   0  393.09   18.71
  -9   3   0  362.64   17.15
  -9   3  -1   20.09    4.71
   9  -3   1    7.88    5.84
   9   3   1    8.19    5.93
  -9   3  -2  300.58   14.65
   9  -3   2  303.57   15.34
   9   3   2  312.83   15.32
  -9   3  -3    2.27    4.14
   9  -3   3    3.44    5.72
   9   3   3    7.17    5.59
  -9   3  -4   18.47    4.38
   9  -3   4   10.10    5.81
   9   3   4   15.62    5.22
  -9   3  -5   26.16    4.19
   9   3   5   28.40    5.18
   9   3   5   19.16    4.50
  -9   3  -6    9.17    3.30
   9   3   6    4.73    3.95
   9   3   6    4.35    3.00
  -9   3  -7   14.63    2.82
   9  -3   7   14.17    3.46
   9   3   7   12.48    3.39
   9  -3   8   10.80    2.28
   9   3   8   11.85    2.24
   9   4 -14    0.09    3.08
   9  -4 -14    2.82    2.91
   9  -4 -14    4.12    3.94
   9   4 -13  125.69    7.65
   9  -4 -13  139.60    7.63
  -9   4  12   -0.54    3.33
   9  -4 -12   -7.25    5.41
   9   4 -12   -2.75    4.36
   9  -4 -12   -0.95    4.31
   9  -4 -11  153.16    8.63
   9  -4 -11  150.20    9.03
   9   4 -11  140.02    8.37
  -9   4  11  123.12    7.70
  -9   4  10   18.03    4.58
   9  -4 -10   24.90    6.21
   9  -4 -10   27.16    5.92
   9   4 -10   32.30    5.28
   9  -4  -9  142.74    9.07
  -9   4   9  130.52    7.91
   9   4  -9  124.07    8.26
  -9   4   8   -0.08    4.53
   9  -4  -8    6.96    6.37
   9   4  -8   10.15    5.01
   9   4  -7  425.91   20.33
   9  -4  -7  466.01   20.77
  -9   4   7  425.29   20.15
   9  -4  -6   75.19    7.36
  -9   4   6   74.43    6.32
   9  -4  -5  982.98   42.07
  -9   4   5  936.24   41.74
   9  -4  -4  132.89    8.88
  -9   4   4  131.18    8.30
   9  -4  -3  306.71   14.80
   9   4  -3  342.52   16.44
  -9   4   3  306.02   15.24
  -9   4   2    5.16    4.94
   9  -4  -2    0.08    4.24
   9   4  -2   13.67    7.11
   9  -4  -1  243.88   12.61
   9   4  -1  277.36   14.54
  -9   4   1  242.44   12.59
   9  -4   0   96.07    7.21
   9   4   0  106.28    9.83
  -9   4   0   97.84    7.12
   9  -4   1  403.66   18.87
   9   4   1  442.62   20.78
  -9   4  -1  383.78   18.68
  -9   4  -2    1.92    4.67
   9  -4   2   -0.79    5.23
   9   4   2   -2.47    7.02
   9  -4   3  202.81   10.91
   9   4   3  193.15   11.64
  -9   4  -3  193.37   10.22
  -9   4  -4  110.50    7.28
   9  -4   4  131.70    8.04
   9   4   4  127.78    8.01
  -9   4  -5   98.64    5.89
   9  -4   5   97.79    6.33
   9  -4   6  146.60    7.65
  -9   4  -6  130.47    7.16
  -9   4  -7   77.01    4.46
   9  -5 -15    2.10    2.15
   9  -5 -13    4.40    2.79
   9  -5 -12  416.75   19.14
  -9   5  12  405.91   19.04
  -9   5  11   17.84    4.24
   9  -5 -11   30.71    5.77
   9  -5 -11   31.20    4.54
   9  -5 -10  491.71   22.56
   9  -5 -10  533.69   22.99
  -9   5  10  478.27   22.38
  -9   5   9    3.14    4.69
   9  -5  -9   -3.27    6.04
   9   5  -9   -2.04    6.19
   9   5  -8  579.69   26.07
   9  -5  -8  589.37   26.07
  -9   5   8  543.05   25.43
  -9   5   7   20.45    5.42
   9  -5  -7   20.20    6.30
   9   5  -7   11.86    6.41
   9   5  -6  295.62   14.99
   9  -5  -6  295.92   15.11
  -9   5   6  291.20   14.43
   9   5  -5   72.93    8.02
   9   5  -5   77.13    7.75
   9  -5  -5   82.90    7.56
  -9   5   5   80.55    6.74
   9   5  -4  153.45   10.28
   9   5  -4  150.00   10.38
   9  -5  -4  155.64    9.76
  -9   5   4  148.06    9.18
  -9   5   3   25.19    5.56
   9   5  -3   23.60    6.57
   9   5  -3   21.68    6.99
   9  -5  -2   81.29    5.87
   9   5  -2   95.95    8.23
   9   5  -2   70.72    8.90
  -9   5   2   88.98    7.03
   9  -5  -1  141.96    8.28
   9   5  -1  146.40    9.70
   9   5  -1  140.29   11.35
  -9   5   1  149.89    9.01
  -9   5   0   15.36    5.38
   9  -5   0   10.72    4.45
   9   5   0   13.48    6.34
   9   5   0    9.14    8.34
   9  -5   1   97.14    6.73
   9   5   1   78.96    7.70
   9   5   1   92.42    9.71
  -9   5  -1   97.98    7.09
   9  -5   2   85.18    6.44
   9   5   2   83.60    7.27
   9   5   2   77.31    8.78
  -9   5  -2   94.60    6.62
  -9   5  -3   31.34    5.02
   9  -5   3   35.46    5.22
   9   5   3   32.94    5.64
   9   5   3   38.35    5.84
  -9   5  -4   -0.49    3.98
   9  -5   4    8.36    4.26
   9   5   4    6.73    4.60
   9  -5   5  321.57   14.34
   9   5   5  298.07   14.30
  -9   5  -5  300.12   14.09
  -9   5  -6   19.73    3.14
   9  -5   6   21.99    3.46
   9   5   6   20.67    3.41
   9  -5   7  131.77    6.90
   9   5   7  151.05    6.99
  -9   5  -7  151.69    6.85
   9  -6 -14   24.57    2.84
  -9   6  12  172.69    8.53
   9  -6 -11   51.65    4.29
  -9   6  11   63.77    4.93
   9  -6 -10   63.84    6.45
   9  -6 -10   61.79    5.03
  -9   6  10   61.79    5.50
  -9   6   9   23.44    4.97
   9  -6  -9   29.32    5.94
   9  -6  -9   18.24    4.61
   9   6  -9   17.39    5.93
   9   6  -8  183.17   10.68
   9  -6  -8  182.26   10.72
  -9   6   8  176.58   10.07
  -9   6   7   55.90    6.27
   9  -6  -7   61.49    7.17
   9   6  -7   65.96    7.20
   9   6  -6  186.60   10.82
   9  -6  -6  174.13   10.85
  -9   6   6  188.99   10.41
  -9   6   5   61.91    6.55
   9  -6  -5   63.15    7.28
   9   6  -5   71.09    7.02
   9   6  -4  189.77   11.20
   9  -6  -4  193.18   11.10
  -9   6   4  191.16   10.68
   9   6  -3   75.02    7.30
   9   6  -3   66.94    8.48
  -9   6   3   67.74    6.67
   9   6  -2  462.39   21.32
   9   6  -2  414.68   22.53
  -9   6   2  465.59   21.05
  -9   6   1   21.61    5.62
   9   6  -1   27.00    6.22
   9   6  -1   11.00    8.02
   9   6   0  314.78   14.26
  -9   6   0  319.73   13.77
  -9   6  -1   52.74    5.82
   9  -6   1   46.37    4.69
   9   6   1   55.07    6.28
   9   6   1   37.76    8.12
   9  -6   2  125.11    7.49
   9   6   2  142.14    8.47
   9   6   2  111.19    8.47
  -9   6  -2  147.80    8.08
  -9   6  -3    5.21    4.11
   9  -6   3   10.45    3.79
   9   6   3    8.22    4.62
   9  -6   4  119.22    7.03
   9   6   4  127.29    7.51
  -9   6  -4  139.71    7.18
  -9   6  -5   20.89    3.26
   9  -6   5   19.45    3.29
   9   6   5   17.81    3.53
   9  -6   6  333.35   15.16
   9   6   6  335.49   15.31
  -9   6  -6  364.35   15.20
   9  -7 -13   29.09    2.90
  -9   7  12    2.97    2.73
   9  -7 -12    3.03    3.35
  -9   7  11  130.52    7.04
  -9   7  10   60.23    5.07
  -9   7   9    7.84    4.39
   9   7  -8  143.61    8.31
   9  -7  -8  139.61    8.74
  -9   7   8  142.01    7.97
  -9   7   7    0.46    5.03
   9  -7  -7    5.48    5.86
   9   7  -7   -3.46    5.22
   9   7  -6  164.82    9.94
   9  -7  -6  179.27   10.56
  -9   7   6  185.86    9.97
  -9   7   5   32.28    5.61
   9  -7  -5   20.76    6.19
   9   7  -5   19.63    5.37
  -9   7   4   32.04    5.73
   9  -7  -4   44.79    6.61
   9   7  -4   33.02    6.16
  -9   7   3   24.01    5.69
   9   7  -3   24.85    5.88
   9   7  -2   80.52    7.17
  -9   7   2   99.34    7.23
   9   7  -1  620.73   29.19
  -9   7   1  680.49   29.06
   9   7   0  219.63   12.20
  -9   7   0  241.87   11.91
   9   7   1   99.22    7.25
  -9   7  -1   91.37    6.59
  -9   7  -2   40.69    4.73
   9  -7   2   27.91    3.37
   9   7   2   40.72    5.29
   9   7   3   72.22    5.63
  -9   7  -3   87.64    5.13
  -9   7  -4   13.45    3.24
   9  -7   4    7.94    2.24
   9   7   4   11.21    3.47
   9   7   5   62.04    4.08
  -9   7  -5   72.45    4.13
   9  -8 -11   88.59    5.28
  -9   8  11   88.49    4.98
  -9   8  10    3.11    3.24
   9  -8 -10    8.11    3.77
   9  -8  -9   72.96    5.48
  -9   8   9   66.48    5.22
  -9   8   8    9.65    3.99
   9   8  -7  116.44    7.41
  -9   8   7  136.66    7.70
  -9   8   6   10.94    4.63
   9  -8  -6    6.56    5.24
   9   8  -6    1.23    4.42
   9   8  -5  266.60   13.85
   9  -8  -5  290.98   14.16
  -9   8   5  298.54   13.91
  -9   8   4    5.52    4.72
   9  -8  -4   -0.69    5.32
   9   8  -4    0.24    4.78
   9   8  -3  161.53    9.94
   9  -8  -3  187.43   10.08
  -9   8   3  192.14    9.86
   9   8  -2   86.58    7.07
  -9   8   2  101.18    6.84
   9   8  -1   63.14    6.34
  -9   8   1   62.30    5.62
  -9   8   0    4.15    4.17
   9   8   0    7.88    5.12
   9   8   1    2.26    4.76
   9   8   2    5.28    4.07
   9   8   3   -0.68    2.94
  -9   9  10   18.39    2.36
   9  -9 -10   14.95    2.43
  -9   9   9    5.99    2.71
   9  -9  -9   11.09    2.99
   9  -9  -8  127.03    7.00
  -9   9   8  128.88    6.85
  -9   9   7    2.00    3.57
   9  -9  -7    4.62    3.87
  -9   9   6  117.43    6.86
  -9   9   5    1.32    3.84
   9   9  -5    5.55    3.47
   9   9  -4  320.07   14.93
   9  -9  -3   -3.70    4.33
   9   9  -3    4.24    4.23
   9   9  -2   65.57    5.99
   9  -9  -2   94.94    5.89
   9  -9  -1    9.82    3.87
  -9   9  -2   49.82    3.41
   9 -10  -7   39.51    3.11
   9 -10  -6    1.51    2.63
   9 -10  -5  154.35    7.68
  -9  10   3   23.51    3.05
  -9  10   2   14.52    2.67
   9 -10  -2   14.33    2.93
   9 -10  -1  152.29    7.21
  -9  10   1  147.11    7.13
  10   0 -14    0.28    3.80
  10   0 -14   -0.48    2.98
  10   0 -13    2.00    4.58
  10   0 -13   -0.89    3.49
  10   0 -12   24.61    5.31
  10   0 -12   19.55    4.25
  10   0 -11    0.43    4.20
  10   0 -11    0.33    5.58
  10   0 -10   45.08    6.59
  10   0 -10   27.23    4.83
  10   0  -9   -1.66    4.66
  10   0  -8 1358.80   57.43
  10   0  -8 1306.93   57.22
  10   0  -7   -2.44    5.10
  10   0  -7    2.96    4.41
  10   0  -6  276.01   13.71
  10   0  -6  278.67   13.67
  10   0  -5    0.17    4.81
  10   0  -5   -0.44    4.93
  10   0  -4  168.23    9.54
  10   0  -4  166.70    9.86
  10   0  -3    1.27    4.91
  10   0  -3   -1.13    5.06
  10   0  -2  118.66    7.75
  10   0  -1    1.97    4.62
  10   0   0  569.99   24.74
  10   0   0  514.27   24.05
  10   0   1    2.61    4.22
  10   0   2  687.17   30.23
  10   0   3    1.96    5.01
  10   0   3   -4.99    3.72
  10   0   4  270.60   12.90
  10   0   4  260.26   12.29
  10   0   5   -1.65    3.65
  10   0   5    3.00    2.58
  10   1 -15    9.71    2.77
  10  -1 -15    4.04    2.88
  10  -1 -14   97.97    5.99
  10   1 -14  118.49    6.38
  10   1 -13    1.04    4.38
  10  -1 -13    0.53    3.83
  10   1 -12   68.64    6.06
  10  -1 -12   54.26    5.39
  10  -1 -11   46.87    5.64
  10   1 -11   59.38    6.20
  10   1 -10  421.22   18.73
  10  -1 -10  422.39   18.91
  10   1  -9  218.66   11.35
  10   1  -9  204.46   10.96
  10  -1  -9  187.01   10.62
  10  -1  -8   82.51    6.16
  10   1  -8   96.25    7.14
  10  -1  -8   87.17    6.54
  10  -1  -7  296.28   14.43
  10   1  -7  334.44   15.11
  10   1  -7  319.64   14.90
  10  -1  -7  309.59   14.42
  10  -1  -7  274.68   14.50
  10  -1  -6   55.48    5.36
  10   1  -6   59.05    6.19
  10   1  -6   59.36    6.23
  10  -1  -6   54.32    5.43
  10  -1  -5  360.66   17.04
  10   1  -5  385.38   17.67
  10   1  -5  381.06   17.70
  10  -1  -5  350.39   17.21
  10  -1  -4   47.70    4.88
  10   1  -4   36.77    5.89
  10   1  -4   48.71    6.34
  10  -1  -4   34.43    5.46
  10  -1  -3  283.33   14.03
  10   1  -3  306.70   14.65
  10   1  -3  297.56   14.95
  10  -1  -2   -0.52    3.92
  10   1  -2   -0.09    5.09
  10   1  -2   -3.41    6.00
  10  -1  -1  525.61   24.07
  10  -1  -1  493.99   23.26
  10   1  -1  555.13   23.75
  10  -1   0  250.30   12.46
  10  -1   0  217.18   11.34
  10   1   0  234.50   11.86
  10  -1   1  499.90   21.52
  10  -1   1  432.48   20.65
  10   1   1  473.62   21.12
  10  -1   2    6.10    3.49
  10   1   2    5.70    4.53
  10  -1   3  213.85   10.83
  10   1   3  259.21   11.49
  10  -1   4   11.06    4.15
  10   1   4   -1.57    3.58
  10  -1   5  171.27    8.64
  10   1   5  161.59    8.24
  10  -1   6    5.25    2.78
  10   1   6    0.86    2.21
  10   1   6    0.08    2.17
  10  -2 -15  146.10    7.21
  10   2 -15  145.30    7.25
  10  -2 -15  163.44    7.33
  10   2 -14   14.79    3.36
  10  -2 -14   13.34    3.64
  10  -2 -14   14.54    3.27
  10  -2 -13  318.78   15.10
  10   2 -13  311.68   15.13
  10  -2 -13  351.99   15.28
  10   2 -12   13.72    4.65
  10  -2 -12   15.79    4.91
  10  -2 -12   18.66    4.54
  10   2 -11  572.04   25.73
  10  -2 -11  620.35   25.98
  10  -2 -11  539.65   25.63
  10  -2 -10   -0.40    4.88
  10   2 -10    6.19    5.21
  10   2  -9  111.03    7.54
  10   2  -9  100.10    7.80
  10  -2  -9   89.78    7.13
  10   2  -8   84.68    7.10
  10   2  -8   87.29    7.41
  10  -2  -8   76.30    6.54
  10   2  -7  407.18   18.79
  10   2  -7  408.44   18.63
  10  -2  -7  369.93   18.34
  10   2  -6   99.53    7.65
  10   2  -6  100.18    7.59
  10  -2  -6   90.09    6.02
  10  -2  -6   78.27    6.61
  10  -2  -5    3.07    4.37
  10   2  -5    4.02    5.74
  10   2  -5   12.09    5.93
  10  -2  -5    6.60    4.11
  10   2  -4  154.27    9.55
  10   2  -4  152.39    9.73
  10  -2  -4  155.45    8.78
  10   2  -3   57.58    6.69
  10   2  -3   56.61    7.05
  10  -2  -2  337.92   16.23
  10   2  -2  338.93   16.51
  10  -2  -1  115.82    7.89
  10   2  -1  109.37    7.96
  10  -2   0  537.08   22.00
  10   2   0  498.57   21.88
  10   2   0  507.99   22.31
  10  -2   1   78.17    6.76
  10   2   1   77.59    6.54
 -10   2  -1   63.67    4.89
  10  -2   2  152.04    8.67
  10   2   2  141.48    8.16
 -10   2  -2  125.96    7.15
 -10   2  -3   11.43    3.02
  10  -2   3   14.71    5.02
  10   2   3   16.87    4.53
  10   2   3    8.29    4.75
  10   2   4  189.97    9.57
  10   2   4  188.29    9.62
  10   2   5   84.52    5.06
  10   2   5   77.21    5.01
  10  -2   6    6.73    2.75
  10   2   6    7.49    2.40
  10  -3 -14  198.89    9.20
  10  -3 -14  206.03    9.15
  10   3 -13    3.97    3.50
  10  -3 -13   -1.24    3.63
  10  -3 -13    1.16    3.68
  10  -3 -12  199.77    9.67
  10  -3 -12  188.45    9.60
  10  -3 -11  398.53   17.73
  10  -3 -11  379.41   17.55
  10   3 -11  354.31   17.32
  10  -3 -10   26.26    5.25
  10  -3 -10   29.45    6.05
  10   3 -10   27.06    5.89
  10   3 -10   32.07    4.94
  10   3  -9  148.82    8.93
  10   3  -9  159.12    9.53
  10  -3  -9  152.63    9.08
  10   3  -8  117.52    8.12
  10  -3  -8  131.92    8.54
  10   3  -7   10.49    4.91
  10  -3  -7   14.46    5.15
  10   3  -7    7.77    6.06
  10   3  -6  339.82   15.98
  10   3  -6  363.39   16.42
  10   3  -6  349.49   16.37
  10  -3  -6  323.34   15.86
 -10   3   6  301.00   15.14
  10   3  -5   89.73    7.86
  10   3  -5   97.05    7.61
  10  -3  -5   89.20    5.84
  10  -3  -5   85.48    6.78
 -10   3   5   83.69    5.85
  10   3  -4  138.45    8.87
  10  -3  -4  124.00    7.30
  10  -3  -4  117.09    7.66
 -10   3   4  117.33    7.10
  10   3  -3  126.01    8.42
  10  -3  -3  104.05    7.04
 -10   3   3  117.04    6.88
  10  -3  -2   77.46    6.15
  10   3  -2   67.67    7.24
  10   3  -2   79.80    7.85
 -10   3   2   77.79    5.71
 -10   3   1   16.42    4.12
  10  -3  -1   14.56    4.98
  10   3  -1   11.93    5.82
  10   3  -1   13.21    6.27
  10  -3   0   60.46    5.93
  10   3   0   64.62    6.56
  10   3   0   53.15    7.14
 -10   3   0   56.86    4.99
 -10   3  -1   38.56    4.47
  10  -3   1   43.04    5.35
  10   3   1   40.82    5.74
 -10   3  -2   -3.30    3.37
  10  -3   2    3.75    4.78
  10   3   2    0.76    4.75
  10   3   2    5.19    5.10
 -10   3  -3    8.30    3.09
  10  -3   3   10.57    4.41
  10   3   3   10.17    4.20
  10   3   3    9.33    4.31
  10  -3   4   50.56    4.64
  10   3   4   51.20    4.52
  10   3   4   45.15    4.47
 -10   3  -4   40.98    3.65
  10   3   5   39.87    3.35
 -10   3  -5   53.66    3.37
  10   3   6   35.57    2.96
  10  -4 -14   12.70    2.82
  10  -4 -13  139.06    7.08
  10  -4 -13  120.36    6.69
  10  -4 -12   35.64    4.50
  10   4 -12   22.11    3.41
  10  -4 -12   32.92    4.12
  10  -4 -11  209.01    9.89
  10  -4 -11  207.24    9.87
  10  -4 -10   24.56    5.16
  10  -4 -10   23.77    5.29
  10   4 -10   14.13    4.21
  10  -4  -9  802.23   32.10
 -10   4   9  679.41   31.42
 -10   4   8   14.02    3.92
  10  -4  -8   17.30    5.64
  10  -4  -7  934.68   39.46
 -10   4   7  874.81   39.01
  10   4  -6  156.36   10.21
  10   4  -6  172.32   10.21
  10  -4  -6  172.35    9.67
 -10   4   6  162.97    8.91
  10   4  -5  730.91   31.00
  10  -4  -5  686.05   30.58
 -10   4   5  664.81   30.29
 -10   4   4    2.94    4.30
  10  -4  -4    5.50    4.81
  10   4  -4    6.08    5.98
  10   4  -3  142.93    9.53
  10   4  -3  158.89   10.07
  10  -4  -3  130.99    8.33
 -10   4   3  147.08    8.20
  10  -4  -2  100.33    6.28
  10   4  -2   89.00    7.77
  10   4  -2   89.03    8.29
  10  -4  -2   78.82    6.25
 -10   4   2   90.03    6.24
 -10   4   1   51.16    5.16
  10  -4  -1   44.33    4.60
  10  -4  -1   54.09    5.10
  10   4  -1   49.19    6.57
  10   4  -1   51.58    7.47
 -10   4   0   31.73    4.65
  10  -4   0   34.27    4.72
  10   4   0   35.72    5.93
  10   4   0   40.22    6.65
 -10   4  -1   -0.80    3.76
  10  -4   1   -0.78    4.32
  10   4   1    3.80    5.33
  10   4   1    3.89    5.34
 -10   4  -2    1.73    3.56
  10  -4   2    3.32    4.02
  10   4   2    4.37    4.69
  10   4   2    4.49    4.81
 -10   4  -3   -0.15    3.14
  10  -4   3    3.63    3.63
  10   4   3    0.19    3.98
  10   4   3    0.27    3.83
  10   4   4  140.76    7.13
 -10   4  -4  134.62    6.62
 -10   4  -5    5.64    2.05
  10  -4   5    6.73    2.78
  10   4   5    8.19    2.84
  10  -5 -13   -2.80    2.99
  10  -5 -12  114.88    6.14
  10  -5 -12   86.68    5.41
  10  -5 -11    1.82    4.18
  10  -5 -11    0.42    3.50
  10  -5 -10   54.25    5.11
  10  -5 -10   60.98    5.42
 -10   5  10   50.69    4.19
 -10   5   9   31.06    4.02
  10  -5  -9   40.14    5.46
 -10   5   8    6.18    3.91
  10  -5  -8    0.85    5.26
 -10   5   7   36.12    4.78
  10  -5  -7   43.11    5.90
 -10   5   6   16.07    4.52
  10  -5  -6   24.92    5.46
 -10   5   5   46.96    5.22
  10  -5  -5   40.15    5.75
 -10   5   4    1.82    4.41
  10  -5  -4   -5.09    4.97
  10   5  -4   -5.62    6.15
  10   5  -3  415.92   18.70
  10  -5  -3  355.61   17.51
 -10   5   3  378.92   17.49
 -10   5   2   19.31    4.52
  10  -5  -2   14.09    4.64
  10   5  -2   15.76    6.74
  10  -5  -1  266.10   12.76
  10  -5  -1  246.42   12.91
 -10   5   1  284.99   13.18
  10  -5   0   81.43    5.41
  10   5   0   86.00    7.74
  10  -5   0   68.04    5.24
 -10   5   0   80.14    5.81
 -10   5  -1   42.40    4.44
  10  -5   1   38.39    4.41
  10   5   1   44.65    6.17
  10  -5   2  116.52    6.71
  10   5   2  124.89    7.47
 -10   5  -2  116.32    6.66
  10  -5   3  104.20    5.95
 -10   5  -3  105.25    5.88
 -10   5  -4   27.25    2.87
  10  -5   4   26.83    3.12
  10  -6 -12   34.77    3.57
 -10   6  11   29.76    2.91
  10  -6 -11   29.16    2.83
  10  -6 -10  164.31    8.42
 -10   6  10  165.18    8.40
  10  -6  -9  124.34    7.36
  10   6  -9  157.04    8.09
  10  -6  -9  145.02    8.04
 -10   6   9  124.48    7.24
  10   6  -8  264.60   12.96
  10  -6  -8  262.48   12.90
 -10   6   8  255.94   12.39
 -10   6   7    9.20    4.26
  10  -6  -7   22.90    5.09
  10   6  -7    9.87    5.26
  10   6  -6  174.78   10.02
  10  -6  -6  179.81    9.84
 -10   6   6  170.27    9.27
  10   6  -5   91.61    7.14
  10  -6  -5   85.19    6.95
 -10   6   5   97.16    6.49
  10   6  -4  229.53   11.86
  10  -6  -4  227.15   11.59
 -10   6   4  219.64   11.37
 -10   6   3   52.08    5.35
  10  -6  -3   47.77    5.47
  10   6  -3   51.32    6.17
  10   6  -2  585.18   24.08
 -10   6   2  545.57   23.61
 -10   6   1   -2.10    4.07
  10  -6  -1    0.59    3.83
  10   6  -1   -1.51    4.87
  10   6   0   90.22    6.45
  10  -6   0   76.44    5.41
 -10   6   0   89.84    5.91
 -10   6  -1   22.21    3.86
  10  -6   1   17.42    3.09
  10  -6   1   18.86    2.86
  10   6   1   28.49    4.43
  10   6   2  153.02    7.65
 -10   6  -2  171.08    7.35
 -10   6  -3   -0.50    2.62
  10  -6   3    1.42    1.99
  10   6   3   -5.59    3.10
  10   6   4  153.46    7.36
  10  -7 -11    6.43    2.85
 -10   7  10   25.44    2.91
  10  -7 -10   20.55    3.67
  10  -7  -9   52.78    4.84
 -10   7   9   50.19    4.09
 -10   7   8   16.48    3.61
  10  -7  -8   11.73    4.38
  10  -7  -8   14.91    3.02
  10   7  -8   14.85    4.04
  10   7  -7  232.92   11.51
  10  -7  -7  239.29   11.63
 -10   7   7  227.36   11.25
 -10   7   6    7.77    3.93
  10  -7  -6    4.08    4.64
  10   7  -6    8.28    4.36
  10   7  -5  252.62   12.62
  10  -7  -5  260.39   12.63
 -10   7   5  257.58   12.40
 -10   7   4    8.23    4.15
  10  -7  -4   -0.52    4.40
  10   7  -4    4.84    4.46
  10   7  -3  275.07   13.31
  10  -7  -3  262.53   13.02
 -10   7   3  276.06   12.97
 -10   7   2   16.29    4.08
  10  -7  -2   15.93    4.18
  10   7  -2   20.19    4.67
  10   7  -1  159.36    8.54
  10  -7  -1  141.16    7.98
 -10   7   1  156.53    8.06
 -10   7   0   26.24    3.71
  10  -7   0   13.14    3.33
  10   7   0   23.01    4.29
 -10   7  -1   23.31    3.27
  10  -7   1   13.80    2.53
  10   7   1   24.21    3.69
 -10   7  -2   11.90    2.56
  10   7   2    5.63    2.93
  10  -8  -9   49.29    3.99
 -10   8   9   49.98    3.40
 -10   8   8   -0.28    2.70
  10  -8  -8    2.21    3.30
 -10   8   7   30.78    3.46
  10  -8  -7   23.30    3.97
  10  -8  -6   43.86    4.51
  10   8  -6   39.59    4.17
 -10   8   6   46.73    4.13
 -10   8   5    2.63    3.39
  10  -8  -5   -1.01    3.80
  10   8  -5   -0.87    3.60
 -10   8   4   11.17    3.65
  10  -8  -4   20.13    3.90
  10   8  -4   18.04    3.89
 -10   8   3   33.93    3.89
  10  -8  -3   26.14    4.02
  10   8  -3   38.47    4.42
  10   8  -2   65.97    5.18
  10  -8  -2   65.61    4.71
 -10   8   2   74.21    4.79
 -10   8   1   10.06    2.95
  10  -8  -1    9.53    2.96
  10   8  -1    0.97    3.34
  10   8   0   55.56    4.32
  10  -8   0   53.09    3.77
 -10   8  -1   -0.16    2.04
  10  -9  -7    1.29    2.16
  10  -9  -6   47.16    3.58
 -10   9   6   51.52    3.38
 -10   9   5    2.32    2.27
  10  -9  -5    0.55    2.53
 -10   9   4   16.21    2.54
  10  -9  -4   18.20    2.77
  10  -9  -3   87.19    4.74
 -10   9   3   83.97    4.71
 -10   9   2   59.92    3.65
  11   0 -14   61.12    3.90
  11   0 -13   -3.02    3.21
  11   0 -12  266.75   12.67
  11   0 -11   -1.99    4.39
  11   0 -10  106.80    7.37
  11   0  -9   -6.02    5.21
  11   0  -8  288.43   13.68
  11   0  -7    2.19    4.26
  11   0  -7    5.26    3.80
  11   0  -6  180.80    9.61
  11   0  -6  181.07    9.61
  11   0  -5   -0.35    4.10
  11   0  -5    1.39    4.47
  11   0  -4   92.11    6.38
  11   0  -4   97.37    6.89
  11   0  -3    4.16    4.03
  11   0  -3    2.29    4.88
  11   0  -2  927.80   41.85
  11   0  -2 1026.61   42.28
  11   0  -1    0.18    3.73
  11   0  -1    0.70    4.59
  11   0   0  381.79   17.48
  11   0   0  396.76   18.02
  11   0   1    1.67    3.02
  11   0   2  286.50   12.90
  11   0   3    1.33    3.01
  11   0   4  315.84   14.12
  11   1 -14   25.70    2.71
  11   1 -13   81.33    5.08
  11   1 -12    1.09    3.51
  11  -1 -12    1.79    3.95
  11   1 -11   20.18    4.27
  11  -1 -11   19.56    4.61
  11  -1 -10   57.80    5.84
  11   1 -10   54.13    5.45
  11   1  -9  549.00   25.61
  11  -1  -9  603.83   25.91
  11   1  -8   79.72    6.51
  11   1  -8   75.05    6.14
  11   1  -7  167.08    8.94
  11   1  -7  163.00    8.70
  11  -1  -7  149.15    8.19
  11   1  -6   -1.84    4.42
  11   1  -6   -2.40    4.43
  11  -1  -6    5.11    3.92
  11   1  -5   69.95    5.87
  11   1  -5   65.07    6.06
  11  -1  -5   59.59    5.47
  11   1  -4    7.38    4.58
  11   1  -4    3.46    4.95
  11  -1  -4    2.08    4.16
  11   1  -3  152.28    8.66
  11   1  -3  156.80    9.09
  11  -1  -3  149.06    8.59
  11   1  -2    0.14    4.36
  11   1  -2    2.95    5.14
  11  -1  -2   -0.53    4.58
  11   1  -1  235.99   11.61
  11   1   0   71.03    5.45
  11   1   1  151.49    7.99
  11   1   1  152.80    8.27
  11   1   2    0.87    3.06
  11   1   2    4.18    3.58
  11   1   3   46.85    3.61
  11   1   3   52.16    4.03
  11   1   4   45.95    3.28
  11  -1   4   41.71    3.35
  11  -2 -14    0.77    2.08
  11   2 -13   12.64    2.77
  11  -2 -13   15.56    3.13
  11   2 -12   27.93    3.70
  11  -2 -12   33.52    4.17
  11  -2 -12   25.89    3.06
  11   2 -11   43.93    4.43
  11  -2 -11   40.18    3.86
  11  -2 -10   26.98    3.84
  11   2 -10   36.03    4.52
  11  -2  -9   42.74    4.29
  11   2  -9   57.05    5.50
  11   2  -9   54.50    5.16
  11   2  -8  167.70    9.08
  11   2  -8  162.50    9.17
  11   2  -7   15.87    4.57
  11   2  -7   17.75    5.23
  11   2  -6  182.97    9.86
  11   2  -6  175.50    9.81
  11   2  -6  198.98    9.93
  11  -2  -6  168.97    8.91
  11   2  -5   65.16    6.18
  11  -2  -5   54.16    4.91
  11   2  -5   65.71    6.21
  11   2  -4  127.28    7.89
  11   2  -4  138.75    8.33
  11  -2  -4  112.99    7.23
  11   2  -3  151.59    8.53
  11   2  -3  146.67    8.89
  11  -2  -3  132.30    7.98
  11   2  -2  288.76   13.80
  11  -2  -2  278.98   13.59
  11   2  -1   -0.07    4.34
  11   2   0  390.96   17.80
  11   2   0  387.74   18.02
  11   2   1   17.09    3.95
  11   2   1   10.76    4.04
  11   2   2   21.18    3.51
  11   2   2   17.90    3.68
  11   2   3  133.58    6.67
  11   2   3  127.19    6.75
  11  -3 -13    4.47    2.47
  11  -3 -12  157.49    7.40
  11   3 -12  118.26    7.13
  11  -3 -11    1.22    3.10
  11   3 -11    0.78    2.98
  11  -3 -11   -2.08    3.93
  11  -3 -10   72.74    5.03
  11   3 -10   59.28    4.87
  11  -3  -9   31.89    4.12
  11   3  -9   33.04    4.97
  11   3  -9   32.63    4.12
  11   3  -8  141.11    8.06
  11  -3  -8  143.19    8.00
  11  -3  -7   17.23    3.81
  11   3  -7   10.15    4.92
  11   3  -6   41.11    5.63
  11   3  -6   37.34    5.39
  11   3  -5   31.99    5.63
  11   3  -5   26.21    5.52
  11   3  -4   42.67    5.73
  11  -3  -4   36.08    3.99
  11   3  -3   26.51    5.17
  11  -3  -3   18.08    3.87
  11   3  -2   -6.84    4.93
  11   3  -2    2.21    5.24
  11  -3  -2    0.55    3.54
  11   3  -1   13.30    4.49
  11   3  -1   13.21    4.66
  11   3   0   -5.02    4.14
  11   3   0    8.48    4.43
  11   3   1   27.92    3.98
  11   3   1   23.15    4.12
  11   3   2   39.68    3.90
  11   3   2   37.47    3.83
  11   3   3    8.95    2.67
  11   3   3    8.40    2.48
  11  -4 -12    8.73    2.72
  11  -4 -12    8.20    2.59
  11  -4 -11   81.94    5.19
  11  -4 -11   79.07    5.01
  11  -4 -10  283.76   12.57
  11  -4 -10  247.16   12.23
  11   4  -9   64.89    5.58
  11  -4  -9   74.30    5.78
  11  -4  -9   56.64    4.94
  11   4  -8  102.93    6.94
  11  -4  -8  101.89    6.33
  11   4  -7   80.21    6.17
  11  -4  -7   57.60    5.01
  11  -4  -6   35.35    4.23
  11   4  -6   41.61    5.53
  11  -4  -5   18.91    3.63
  11   4  -5   35.28    5.13
  11   4  -4   76.38    6.48
  11   4  -3    1.35    4.81
  11   4  -3    0.93    5.12
 -11   4   2   26.61    3.33
  11   4  -2   30.52    5.03
  11   4  -2   28.28    5.29
  11  -4  -2   27.64    3.46
 -11   4   1    5.78    2.71
  11   4  -1    5.70    4.24
  11   4  -1    5.74    4.48
  11   4   0    2.85    3.76
  11   4   0    7.76    4.11
  11   4   1   17.55    3.63
  11   4   1   20.25    3.65
  11   4   2    0.27    2.95
  11   4   2    1.77    2.45
  11   4   3   60.99    3.82
  11  -5 -11  166.33    7.90
  11  -5 -11  168.79    8.03
  11  -5 -10    3.19    2.98
  11  -5 -10    4.07    2.98
  11  -5  -9  334.82   14.94
  11  -5  -9  317.37   14.83
  11  -5  -8    0.88    3.55
  11  -5  -7  135.40    7.40
  11  -5  -6   50.25    4.49
 -11   5   6   42.65    3.69
  11  -5  -5  135.52    7.20
 -11   5   5  128.85    6.82
 -11   5   4    8.00    3.04
  11  -5  -4    4.61    3.22
 -11   5   3  391.30   17.44
 -11   5   2    2.60    2.83
  11   5  -1   92.30    5.99
 -11   5   1   73.98    4.70
 -11   5   0   62.03    3.93
 -11   5  -1   11.44    2.10
  11  -6 -10   38.77    3.23
  11  -6  -9    5.06    2.46
  11  -6  -9    6.65    2.83
  11  -6  -8   89.54    5.50
  11   6  -8  104.70    5.86
  11  -6  -8   93.68    5.54
 -11   6   7   13.02    2.50
  11  -6  -7   15.61    3.43
  11   6  -7   22.13    4.01
  11  -6  -6  143.01    7.37
 -11   6   6  127.41    6.95
 -11   6   5    6.56    2.82
  11  -6  -5    3.30    3.22
  11   6  -5    7.38    4.06
  11  -6  -4  345.01   16.95
 -11   6   4  387.91   16.99
  11   6  -3   47.99    4.56
 -11   6   3   41.69    3.54
  11   6  -2  325.93   14.43
 -11   6   2  302.31   13.89
 -11   6   1    9.22    2.44
  11   6  -1   15.51    3.39
 -11   6   0   26.50    2.51
  11   6   0   32.55    3.22
  11   6   1   36.46    2.96
  11  -7  -8   24.94    2.78
  11  -7  -7   76.75    4.58
 -11   7   6    2.29    2.11
  11  -7  -6    3.97    2.71
  11   7  -6    3.15    2.96
  11  -7  -5  117.40    6.27
 -11   7   5  117.93    6.05
 -11   7   4   27.04    2.83
  11  -7  -4   23.23    2.78
  11   7  -4   32.58    3.54
  11   7  -3  135.24    6.92
 -11   7   3  126.84    6.35
  11   7  -2   37.34    3.47
  11   7  -1   63.93    3.94
  12   0 -12   72.40    4.21
  12   0 -11    1.93    2.87
  12   0 -10  597.80   26.05
  12   0  -9    2.79    3.51
  12   0  -8  234.48   11.36
  12   0  -7    1.77    4.02
  12   0  -6  185.31    9.09
  12   0  -5   -1.82    3.34
  12   0  -4   93.91    5.82
  12   0  -3    1.83    3.43
  12   0  -2  303.00   13.94
  12   0  -1   -0.30    3.13
  12   0   0   40.73    3.64
  12  -1 -12    4.67    2.21
  12  -1 -11  127.03    6.13
  12   1 -11  105.08    5.89
  12   1 -10    2.29    2.87
  12  -1 -10    2.69    3.27
  12   1  -9  210.59   10.37
  12  -1  -9  228.73   10.67
  12   1  -8   10.26    3.42
  12  -1  -8   13.43    4.02
  12   1  -7   20.41    3.71
  12   1  -7   13.72    3.37
  12   1  -6   25.10    3.83
  12   1  -6   25.98    3.66
  12  -1  -6   25.34    3.18
  12   1  -5   15.02    3.51
  12   1  -5   13.07    3.68
  12  -1  -5   14.48    3.45
  12   1  -4   16.10    3.43
  12   1  -4   20.61    3.88
  12  -1  -4   19.41    3.48
  12   1  -3   58.44    4.42
  12   1  -3   70.72    5.02
  12  -1  -3   65.41    4.70
  12   1  -2   15.39    2.99
  12   1  -2   16.41    3.59
  12  -1  -2   14.97    3.32
  12   1  -1   15.26    2.56
  12   1  -1   19.64    3.41
  12  -1  -1   18.15    3.19
  12  -1   0    3.38    2.71
  12   1   1    1.69    2.31
  12  -2 -10  140.30    6.08
  12   2 -10   85.34    5.19
  12  -2  -9    4.92    3.80
  12   2  -9    3.42    2.56
  12   2  -8  115.53    6.76
  12  -2  -8  139.10    7.31
  12   2  -7   58.81    4.67
  12   2  -6   24.86    3.83
  12   2  -5  189.78    8.92
  12   2  -5  201.34    9.05
  12   2  -4   52.84    4.54
  12   2  -4   64.19    4.84
  12  -2  -4   51.59    3.97
  12   2  -3  212.06   10.28
  12   2  -3  230.67   10.60
  12  -2  -3  207.38   10.13
  12   2  -2   29.87    3.43
  12  -2  -2   23.69    3.27
  12   2  -1   50.98    3.84
  12  -2  -1   56.55    3.77
  12   2   0   24.74    2.60
  12   2   0   33.09    3.16
  12  -2   0   26.77    2.85
  12   2   1   46.77    3.22
  12  -2   1   48.88    3.17
  12  -3 -11    3.95    2.39
  12  -3 -10    8.27    2.87
  12   3  -8    5.23    3.36
  12   3  -7    1.33    3.47
  12   3  -6   25.73    3.94
  12   3  -5   -0.05    3.55
  12   3  -4  164.72    8.49
  12   3  -4  170.58    8.62
  12   3  -3   11.63    3.32
  12   3  -2   54.51    3.97
  12   3  -2   57.47    4.11
  12   3  -1   29.98    3.13
  12   3  -1   30.62    3.24
  12  -3  -1   23.95    2.50
  12   3   0   32.11    2.70
  12   3   0   30.81    2.79
  12  -4 -10  127.41    6.28
  12  -4  -9    4.36    2.82
  12  -4  -8   40.10    3.89
  12   4  -7   27.04    3.64
  12   4  -6   62.93    4.66
  12   4  -5  101.11    5.92
  12   4  -4  174.29    8.66
  12   4  -3   18.05    3.33
  12   4  -2   19.11    3.12
  12   4  -1  247.50   11.21
  12  -5  -8    9.99    2.36
  12   5  -7  173.36    8.46
  12  -5  -7  178.37    8.47
  12   5  -6   13.22    3.05
  12   5  -5   94.45    5.44
  12   5  -4   -1.47    2.82
  12   5  -3  190.01    8.94
  12   5  -2    4.69    2.29
   0   0   0    0.00    0.00


TITL CU-N2 in P2(1)/c
REM P2(1)/c (#14 in standard setting)
CELL 1.54184  10.562851  11.333220  14.625374  90.0000 108.2542  90.0000
ZERR    7.00   0.000201   0.000217   0.000256   0.0000   0.0020   0.0000
LATT  1
SYMM -x, y+1/2,-z+1/2
SFAC C H N O
UNIT 77.00 70.00 7.00 7.00
TREF
HKLF 4
END
_computing_structure_solution     'SHELXT 2014/5 (Sheldrick, 2014)'
;
_shelx_hkl_checksum                1564
_olex2_submission_special_instructions  'No special instructions were received'
_oxdiff_exptl_absorpt_empirical_details
;
Empirical correction (ABSPACK) includes:
- Absorption correction using spherical harmonics
- Frame scaling
- Detector area scaling
;
_oxdiff_exptl_absorpt_empirical_full_max  3.452
_oxdiff_exptl_absorpt_empirical_full_min  0.723
