# Supplementary material
Source: publisher figshare collection journal article supplement (https://acs.figshare.com/ndownloader/files/18064346)
Supplement: Supplementary file 1 [file 18064346 › NKU-FlexMOF-1a.cif]

# start Validation Reply Form
_vrf_PLAT601_NUM-10a
;
PROBLEM: Structure Contains Solvent Accessible VOIDS of .        260 Ang**3
RESPONSE: In the structure of NKU-FlexMOF-1a, there the highest difference peak is 0.3, which shows that nothing is in channels
;
# end Validation Reply Form

data_NKU-FlexMOF-1a
_audit_creation_date               2018-11-23
_audit_creation_method
;
Olex2 1.2
(compiled 2018.05.29 svn.r3508 for OlexSys, GUI svn.r5506)
;
_shelx_SHELXL_version_number       '2014/7'
_audit_contact_author_address      ?
_audit_contact_author_email        ?
_audit_contact_author_name         ''
_audit_contact_author_phone        ?
_publ_contact_author_id_orcid      ?
_publ_section_references
;
Dolomanov, O.V., Bourhis, L.J., Gildea, R.J, Howard, J.A.K. & Puschmann, H.
 (2009), J. Appl. Cryst. 42, 339-341.

Sheldrick, G.M. (2015). Acta Cryst. A71, 3-8.

Sheldrick, G.M. (2015). Acta Cryst. C71, 3-8.
;
_chemical_name_common              ?
_chemical_name_systematic          ?
_chemical_formula_moiety           'C13 H6 Cu F N O4'
_chemical_formula_sum              'C13 H6 Cu F N O4'
_chemical_formula_weight           322.74
_chemical_melting_point            ?
loop_
  _atom_type_symbol
  _atom_type_description
  _atom_type_scat_dispersion_real
  _atom_type_scat_dispersion_imag
  _atom_type_scat_source
 'C' 'C' 0.0181 0.0091 'International Tables Vol C Tables 4.2.6.8 and 6.1.1.4'
 'H' 'H' 0.0000 0.0000 'International Tables Vol C Tables 4.2.6.8 and 6.1.1.4'
 'Cu' 'Cu' -1.9646 0.5888
 'International Tables Vol C Tables 4.2.6.8 and 6.1.1.4'
 'F' 'F' 0.0727 0.0534 'International Tables Vol C Tables 4.2.6.8 and 6.1.1.4'
 'N' 'N' 0.0311 0.0180 'International Tables Vol C Tables 4.2.6.8 and 6.1.1.4'
 'O' 'O' 0.0492 0.0322 'International Tables Vol C Tables 4.2.6.8 and 6.1.1.4'

_shelx_space_group_comment
;
The symmetry employed for this shelxl refinement is uniquely defined
by the following loop, which should always be used as a source of
symmetry information in preference to the above space-group names.
They are only intended as comments.
;
_space_group_crystal_system        'monoclinic'
_space_group_IT_number             14
_space_group_name_H-M_alt          'P 1 21/c 1'
_space_group_name_Hall             '-P 2ybc'
loop_
  _space_group_symop_operation_xyz
 'x, y, z'
 '-x, y+1/2, -z+1/2'
 '-x, -y, -z'
 'x, -y-1/2, z-1/2'

_cell_length_a                     10.4862(2)
_cell_length_b                     10.5374(3)
_cell_length_c                     15.0449(4)
_cell_angle_alpha                  90
_cell_angle_beta                   106.838(3)
_cell_angle_gamma                  90
_cell_volume                       1591.15(8)
_cell_formula_units_Z              4
_cell_measurement_reflns_used      2326
_cell_measurement_temperature      298.00(10)
_cell_measurement_theta_max        73.6110
_cell_measurement_theta_min        5.1810
_shelx_estimated_absorpt_T_max     0.938
_shelx_estimated_absorpt_T_min     0.882
_exptl_absorpt_coefficient_mu      2.144
_exptl_absorpt_correction_T_max    1.00000
_exptl_absorpt_correction_T_min    0.91676
_exptl_absorpt_correction_type     multi-scan
_exptl_absorpt_process_details
;
CrysAlisPro 1.171.39.9d (Rigaku Oxford Diffraction, 2015)
Empirical absorption correction using spherical harmonics,
 implemented in SCALE3 ABSPACK scaling algorithm.
;
_exptl_absorpt_special_details     ?
_exptl_crystal_colour              blue
_exptl_crystal_density_diffrn      1.347
_exptl_crystal_density_meas        ?
_exptl_crystal_density_method      ?
_exptl_crystal_description         rhombus
_exptl_crystal_F_000               644
_exptl_crystal_size_max            0.06
_exptl_crystal_size_mid            0.04
_exptl_crystal_size_min            0.03
_exptl_transmission_factor_max     ?
_exptl_transmission_factor_min     ?
_diffrn_reflns_av_R_equivalents    0.0324
_diffrn_reflns_av_unetI/netI       0.0472
_diffrn_reflns_Laue_measured_fraction_full  0.992
_diffrn_reflns_Laue_measured_fraction_max  0.992
_diffrn_reflns_limit_h_max         9
_diffrn_reflns_limit_h_min         -12
_diffrn_reflns_limit_k_max         12
_diffrn_reflns_limit_k_min         -8
_diffrn_reflns_limit_l_max         17
_diffrn_reflns_limit_l_min         -17
_diffrn_reflns_number              6370
_diffrn_reflns_point_group_measured_fraction_full  0.992
_diffrn_reflns_point_group_measured_fraction_max  0.992
_diffrn_reflns_theta_full          67.057
_diffrn_reflns_theta_max           67.057
_diffrn_reflns_theta_min           4.405
_diffrn_ambient_environment        air
_diffrn_ambient_temperature        298.00(10)
_diffrn_detector                   'CCD plate'
_diffrn_detector_area_resol_mean   ?
_diffrn_measured_fraction_theta_full  0.992
_diffrn_measured_fraction_theta_max  0.992
_diffrn_measurement_details
;
List of Runs (angles in degrees, time in seconds):

  # Type    Start    End  Width  t~exp~   \w     \q     \k     \f   Frames
--------------------------------------------------------------------------
  1  \w    -11.00  48.00   0.50    0.50    --    0.00  77.00-120.00  118
  2  \w    -30.00  29.00   0.50    0.50    --    0.00  82.00   0.00  118
  3  \w     64.00 185.00   0.50    0.50    --   95.20  15.00 -30.00  242
  4  \w    141.00 185.00   0.50    0.50    --   95.20  15.00 -90.00   88
  5  \w     62.00 125.00   0.50    0.50    --   95.20  15.00 -90.00  126
  6  \w     28.00 128.00   0.50    0.50    --   95.20 -82.00  90.00  200
  7  \w      6.00 117.00   0.50    0.50    --   95.20 -30.00 120.00  222
;
_diffrn_measurement_device         'four-circle diffractometer'
_diffrn_measurement_device_type    'XtaLAB Pro: Kappa single'
_diffrn_measurement_method         '\w scans'
_diffrn_orient_matrix_type        
 'CrysAlisPro convention (1999,Acta A55,543-557)'
_diffrn_orient_matrix_UB_11        0.0123890000
_diffrn_orient_matrix_UB_12        -0.0373787000
_diffrn_orient_matrix_UB_13        -0.0961581000
_diffrn_orient_matrix_UB_21        -0.1419769000
_diffrn_orient_matrix_UB_22        0.0498404000
_diffrn_orient_matrix_UB_23        -0.0458750000
_diffrn_orient_matrix_UB_31        0.0569772000
_diffrn_orient_matrix_UB_32        0.1322400000
_diffrn_orient_matrix_UB_33        -0.0099331000
_diffrn_radiation_monochromator    graphite
_diffrn_radiation_probe            x-ray
_diffrn_radiation_type             CuK\a
_diffrn_radiation_wavelength       1.54184
_diffrn_source                     'fine-focus sealed X-ray tube'
_diffrn_source_type                'Enhance (Cu) X-ray Source'
_reflns_Friedel_coverage           0.000
_reflns_Friedel_fraction_full      .
_reflns_Friedel_fraction_max       .
_reflns_number_gt                  2263
_reflns_number_total               2816
_reflns_odcompleteness_completeness  99.04
_reflns_odcompleteness_iscentric   1
_reflns_odcompleteness_theta       66.97
_reflns_special_details
;
 Reflections were merged by SHELXL according to the crystal
 class for the calculation of statistics and refinement.
 
 _reflns_Friedel_fraction is defined as the number of unique
 Friedel pairs measured divided by the number that would be
 possible theoretically, ignoring centric projections and
 systematic absences.
;
_reflns_threshold_expression       'I > 2\s(I)'
_computing_cell_refinement         'CrysAlisPro 1.171.39.9d (Rigaku OD, 2015)'
_computing_data_collection         'CrysAlisPro 1.171.39.9d (Rigaku OD, 2015)'
_computing_data_reduction          'CrysAlisPro 1.171.39.9d (Rigaku OD, 2015)'
_computing_molecular_graphics      'Olex2 (Dolomanov et al., 2009)'
_computing_publication_material    'Olex2 (Dolomanov et al., 2009)'
_computing_structure_refinement    'ShelXL (Sheldrick, 2015)'
_computing_structure_solution      'ShelXT (Sheldrick, 2015)'
_refine_diff_density_max           0.303
_refine_diff_density_min           -0.408
_refine_diff_density_rms           0.066
_refine_ls_extinction_coef         .
_refine_ls_extinction_method       none
_refine_ls_goodness_of_fit_ref     1.044
_refine_ls_hydrogen_treatment      constr
_refine_ls_matrix_type             full
_refine_ls_number_parameters       181
_refine_ls_number_reflns           2816
_refine_ls_number_restraints       0
_refine_ls_R_factor_all            0.0544
_refine_ls_R_factor_gt             0.0407
_refine_ls_restrained_S_all        1.044
_refine_ls_shift/su_max            0.000
_refine_ls_shift/su_mean           0.000
_refine_ls_structure_factor_coef   Fsqd
_refine_ls_weighting_details      
 'w=1/[\s^2^(Fo^2^)+(0.0481P)^2^+1.0968P] where P=(Fo^2^+2Fc^2^)/3'
_refine_ls_weighting_scheme        calc
_refine_ls_wR_factor_gt            0.1014
_refine_ls_wR_factor_ref           0.1070
_refine_special_details            ?
_olex2_refinement_description
;
1. Fixed Uiso
 At 1.2 times of:
  All C(H) groups
2.a Aromatic/amide H refined with riding coordinates:
 C00B(H00B), C00E(H00E), C00G(H00G), C00H(H00H), C00I(H00I), C00J(H00J)
;
_atom_sites_solution_hydrogens     geom
_atom_sites_solution_primary       direct
_atom_sites_solution_secondary     ?
loop_
  _atom_site_label
  _atom_site_type_symbol
  _atom_site_fract_x
  _atom_site_fract_y
  _atom_site_fract_z
  _atom_site_U_iso_or_equiv
  _atom_site_adp_type
  _atom_site_occupancy
  _atom_site_site_symmetry_order
  _atom_site_calc_flag
  _atom_site_refinement_flags_posn
  _atom_site_refinement_flags_adp
  _atom_site_refinement_flags_occupancy
  _atom_site_disorder_assembly
  _atom_site_disorder_group
 Cu01 Cu 0.90786(4) 1.08840(4) 0.48869(3) 0.02491(15) Uani 1 1 d . . . . .
 O002 O 0.9771(2) 0.6394(2) 0.88807(15) 0.0383(6) Uani 1 1 d . . . . .
 O003 O 0.8172(2) 0.4936(2) 0.87078(15) 0.0386(6) Uani 1 1 d . . . . .
 O004 O 0.9703(2) 0.8301(2) 0.57243(17) 0.0403(6) Uani 1 1 d . . . . .
 O005 O 0.8073(2) 0.9746(2) 0.54676(16) 0.0404(6) Uani 1 1 d . . . . .
 N006 N 0.2215(2) 0.7470(3) 0.53402(19) 0.0337(6) Uani 1 1 d . . . . .
 F007 F 0.1961(3) 0.4116(2) 0.5514(3) 0.1019(12) Uani 1 1 d . . . . .
 C008 C 0.8688(3) 0.5887(3) 0.8450(2) 0.0304(7) Uani 1 1 d . . . . .
 C009 C 0.8607(3) 0.8713(3) 0.5778(2) 0.0323(7) Uani 1 1 d . . . . .
 C00A C 0.7883(3) 0.7876(3) 0.6275(2) 0.0326(8) Uani 1 1 d . . . . .
 C00B C 0.8590(3) 0.7268(3) 0.7085(2) 0.0339(8) Uani 1 1 d . . . . .
 H00B H 0.9503 0.7398 0.7321 0.041 Uiso 1 1 calc R . . . .
 C00C C 0.4408(3) 0.6611(3) 0.5967(2) 0.0332(8) Uani 1 1 d . . . . .
 C00D C 0.5870(3) 0.6839(3) 0.6355(2) 0.0327(7) Uani 1 1 d . . . . .
 C00E C 0.6510(3) 0.7681(3) 0.5921(2) 0.0351(8) Uani 1 1 d . . . . .
 H00E H 0.6026 0.8117 0.5393 0.042 Uiso 1 1 calc R . . . .
 C00F C 0.7947(3) 0.6474(3) 0.7539(2) 0.0320(7) Uani 1 1 d . . . . .
 C00G C 0.6591(3) 0.6239(3) 0.7168(2) 0.0333(8) Uani 1 1 d . . . . .
 H00G H 0.6166 0.5677 0.7465 0.040 Uiso 1 1 calc R . . . .
 C00H C 0.3537(3) 0.7607(3) 0.5670(2) 0.0331(7) Uani 1 1 d . . . . .
 H00H H 0.3889 0.8422 0.5702 0.040 Uiso 1 1 calc R . . . .
 C00I C 0.1708(3) 0.6309(4) 0.5289(3) 0.0474(10) Uani 1 1 d . . . . .
 H00I H 0.0793 0.6194 0.5053 0.057 Uiso 1 1 calc R . . . .
 C00J C 0.3872(3) 0.5407(4) 0.5919(3) 0.0516(11) Uani 1 1 d . . . . .
 H00J H 0.4413 0.4701 0.6113 0.062 Uiso 1 1 calc R . . . .
 C00K C 0.2510(4) 0.5287(4) 0.5577(3) 0.0563(11) Uani 1 1 d . . . . .

loop_
  _atom_site_aniso_label
  _atom_site_aniso_U_11
  _atom_site_aniso_U_22
  _atom_site_aniso_U_33
  _atom_site_aniso_U_23
  _atom_site_aniso_U_13
  _atom_site_aniso_U_12
 Cu01 0.0149(2) 0.0328(3) 0.0245(2) 0.00036(19) 0.00181(16) 0.00063(19)
 O002 0.0262(11) 0.0497(15) 0.0322(12) 0.0114(11) -0.0025(9) -0.0055(11)
 O003 0.0275(11) 0.0479(15) 0.0337(12) 0.0124(11) -0.0019(10) -0.0041(11)
 O004 0.0252(12) 0.0479(15) 0.0500(14) 0.0128(12) 0.0146(10) -0.0010(11)
 O005 0.0242(11) 0.0481(15) 0.0504(14) 0.0146(12) 0.0132(10) 0.0015(11)
 N006 0.0176(12) 0.0362(16) 0.0426(16) 0.0013(13) 0.0015(11) 0.0021(12)
 F007 0.0442(15) 0.0400(15) 0.205(4) 0.0035(18) 0.0095(18) -0.0117(12)
 C008 0.0226(15) 0.0408(19) 0.0274(16) 0.0046(14) 0.0067(12) 0.0048(15)
 C009 0.0235(15) 0.044(2) 0.0264(15) 0.0063(14) 0.0017(13) -0.0038(15)
 C00A 0.0193(15) 0.045(2) 0.0320(16) 0.0079(15) 0.0048(13) -0.0011(14)
 C00B 0.0167(14) 0.049(2) 0.0330(17) 0.0063(15) 0.0031(12) -0.0024(14)
 C00C 0.0171(15) 0.040(2) 0.0389(18) 0.0079(15) 0.0016(13) 0.0002(14)
 C00D 0.0171(15) 0.042(2) 0.0346(17) 0.0073(15) 0.0014(12) -0.0001(14)
 C00E 0.0195(15) 0.050(2) 0.0329(17) 0.0126(15) 0.0024(13) 0.0006(15)
 C00F 0.0230(15) 0.043(2) 0.0278(16) 0.0072(14) 0.0037(12) 0.0027(14)
 C00G 0.0198(15) 0.044(2) 0.0356(17) 0.0120(15) 0.0072(13) 0.0006(14)
 C00H 0.0208(15) 0.0380(19) 0.0377(18) 0.0021(15) 0.0038(13) -0.0028(14)
 C00I 0.0171(16) 0.043(2) 0.075(3) -0.0049(19) 0.0025(16) -0.0037(15)
 C00J 0.0266(18) 0.039(2) 0.082(3) 0.010(2) 0.0038(19) 0.0056(16)
 C00K 0.0280(18) 0.035(2) 0.098(3) -0.003(2) 0.006(2) -0.0050(17)

_geom_special_details
;
 All esds (except the esd in the dihedral angle between two l.s. planes)
 are estimated using the full covariance matrix.  The cell esds are taken
 into account individually in the estimation of esds in distances, angles
 and torsion angles; correlations between esds in cell parameters are only
 used when they are defined by crystal symmetry.  An approximate (isotropic)
 treatment of cell esds is used for estimating esds involving l.s. planes.
;
loop_
  _geom_bond_atom_site_label_1
  _geom_bond_atom_site_label_2
  _geom_bond_distance
  _geom_bond_site_symmetry_2
  _geom_bond_publ_flag
 Cu01 Cu01 2.6344(8) 3_776 ?
 Cu01 O002 1.971(2) 2_756 ?
 Cu01 O003 1.954(2) 4_575 ?
 Cu01 O004 1.974(2) 3_776 ?
 Cu01 O005 1.961(2) . ?
 Cu01 N006 2.167(3) 3_676 ?
 O002 Cu01 1.971(2) 2_746 ?
 O002 C008 1.253(4) . ?
 O003 Cu01 1.954(2) 4_576 ?
 O003 C008 1.253(4) . ?
 O004 Cu01 1.974(2) 3_776 ?
 O004 C009 1.253(4) . ?
 O005 C009 1.251(4) . ?
 N006 Cu01 2.167(3) 3_676 ?
 N006 C00H 1.339(4) . ?
 N006 C00I 1.327(5) . ?
 F007 C00K 1.354(4) . ?
 C008 C00F 1.499(4) . ?
 C009 C00A 1.498(4) . ?
 C00A C00B 1.385(4) . ?
 C00A C00E 1.398(4) . ?
 C00B H00B 0.9300 . ?
 C00B C00F 1.375(4) . ?
 C00C C00D 1.493(4) . ?
 C00C C00H 1.378(4) . ?
 C00C C00J 1.381(5) . ?
 C00D C00E 1.386(4) . ?
 C00D C00G 1.390(4) . ?
 C00E H00E 0.9300 . ?
 C00F C00G 1.391(4) . ?
 C00G H00G 0.9300 . ?
 C00H H00H 0.9300 . ?
 C00I H00I 0.9300 . ?
 C00I C00K 1.358(5) . ?
 C00J H00J 0.9300 . ?
 C00J C00K 1.376(5) . ?

loop_
  _geom_angle_atom_site_label_1
  _geom_angle_atom_site_label_2
  _geom_angle_atom_site_label_3
  _geom_angle
  _geom_angle_site_symmetry_1
  _geom_angle_site_symmetry_3
  _geom_angle_publ_flag
 O002 Cu01 Cu01 81.11(7) 2_756 3_776 ?
 O002 Cu01 O004 91.00(10) 2_756 3_776 ?
 O002 Cu01 N006 96.56(10) 2_756 3_676 ?
 O003 Cu01 Cu01 87.16(7) 4_575 3_776 ?
 O003 Cu01 O002 168.10(10) 4_575 2_756 ?
 O003 Cu01 O004 88.84(10) 4_575 3_776 ?
 O003 Cu01 O005 87.20(10) 4_575 . ?
 O003 Cu01 N006 95.34(10) 4_575 3_676 ?
 O004 Cu01 Cu01 79.54(7) 3_776 3_776 ?
 O004 Cu01 N006 92.19(10) 3_776 3_676 ?
 O005 Cu01 Cu01 88.78(7) . 3_776 ?
 O005 Cu01 O002 90.52(10) . 2_756 ?
 O005 Cu01 O004 167.84(10) . 3_776 ?
 O005 Cu01 N006 99.62(10) . 3_676 ?
 N006 Cu01 Cu01 171.33(8) 3_676 3_776 ?
 C008 O002 Cu01 125.9(2) . 2_746 ?
 C008 O003 Cu01 119.62(19) . 4_576 ?
 C009 O004 Cu01 127.5(2) . 3_776 ?
 C009 O005 Cu01 117.3(2) . . ?
 C00H N006 Cu01 120.4(2) . 3_676 ?
 C00I N006 Cu01 120.5(2) . 3_676 ?
 C00I N006 C00H 118.4(3) . . ?
 O002 C008 O003 126.1(3) . . ?
 O002 C008 C00F 116.7(3) . . ?
 O003 C008 C00F 117.2(3) . . ?
 O004 C009 C00A 115.8(3) . . ?
 O005 C009 O004 126.7(3) . . ?
 O005 C009 C00A 117.5(3) . . ?
 C00B C00A C009 119.4(3) . . ?
 C00B C00A C00E 119.8(3) . . ?
 C00E C00A C009 120.7(3) . . ?
 C00A C00B H00B 119.9 . . ?
 C00F C00B C00A 120.3(3) . . ?
 C00F C00B H00B 119.9 . . ?
 C00H C00C C00D 120.9(3) . . ?
 C00H C00C C00J 117.5(3) . . ?
 C00J C00C C00D 121.6(3) . . ?
 C00E C00D C00C 120.1(3) . . ?
 C00E C00D C00G 119.5(3) . . ?
 C00G C00D C00C 120.5(3) . . ?
 C00A C00E H00E 120.0 . . ?
 C00D C00E C00A 120.0(3) . . ?
 C00D C00E H00E 120.0 . . ?
 C00B C00F C008 120.5(3) . . ?
 C00B C00F C00G 120.0(3) . . ?
 C00G C00F C008 119.5(3) . . ?
 C00D C00G C00F 120.4(3) . . ?
 C00D C00G H00G 119.8 . . ?
 C00F C00G H00G 119.8 . . ?
 N006 C00H C00C 123.8(3) . . ?
 N006 C00H H00H 118.1 . . ?
 C00C C00H H00H 118.1 . . ?
 N006 C00I H00I 119.6 . . ?
 N006 C00I C00K 120.8(3) . . ?
 C00K C00I H00I 119.6 . . ?
 C00C C00J H00J 121.1 . . ?
 C00K C00J C00C 117.8(3) . . ?
 C00K C00J H00J 121.1 . . ?
 F007 C00K C00I 119.3(3) . . ?
 F007 C00K C00J 119.0(3) . . ?
 C00I C00K C00J 121.8(4) . . ?

loop_
  _geom_torsion_atom_site_label_1
  _geom_torsion_atom_site_label_2
  _geom_torsion_atom_site_label_3
  _geom_torsion_atom_site_label_4
  _geom_torsion
  _geom_torsion_site_symmetry_1
  _geom_torsion_site_symmetry_2
  _geom_torsion_site_symmetry_3
  _geom_torsion_site_symmetry_4
  _geom_torsion_publ_flag
 Cu01 O002 C008 O003 -3.2(5) 2_746 . . . ?
 Cu01 O002 C008 C00F 177.2(2) 2_746 . . . ?
 Cu01 O003 C008 O002 0.3(5) 4_576 . . . ?
 Cu01 O003 C008 C00F 179.9(2) 4_576 . . . ?
 Cu01 O004 C009 O005 -1.6(5) 3_776 . . . ?
 Cu01 O004 C009 C00A 179.1(2) 3_776 . . . ?
 Cu01 O005 C009 O004 -3.0(5) . . . . ?
 Cu01 O005 C009 C00A 176.2(2) . . . . ?
 Cu01 N006 C00H C00C 169.7(3) 3_676 . . . ?
 Cu01 N006 C00I C00K -169.1(3) 3_676 . . . ?
 O002 C008 C00F C00B 18.1(5) . . . . ?
 O002 C008 C00F C00G -160.0(3) . . . . ?
 O003 C008 C00F C00B -161.6(3) . . . . ?
 O003 C008 C00F C00G 20.3(5) . . . . ?
 O004 C009 C00A C00B 41.7(5) . . . . ?
 O004 C009 C00A C00E -136.9(3) . . . . ?
 O005 C009 C00A C00B -137.6(3) . . . . ?
 O005 C009 C00A C00E 43.8(5) . . . . ?
 N006 C00I C00K F007 -179.9(4) . . . . ?
 N006 C00I C00K C00J -0.8(7) . . . . ?
 C008 C00F C00G C00D 175.8(3) . . . . ?
 C009 C00A C00B C00F -178.5(3) . . . . ?
 C009 C00A C00E C00D 175.7(3) . . . . ?
 C00A C00B C00F C008 -175.6(3) . . . . ?
 C00A C00B C00F C00G 2.5(5) . . . . ?
 C00B C00A C00E C00D -2.9(5) . . . . ?
 C00B C00F C00G C00D -2.3(5) . . . . ?
 C00C C00D C00E C00A -178.8(3) . . . . ?
 C00C C00D C00G C00F -178.6(3) . . . . ?
 C00C C00J C00K F007 179.3(4) . . . . ?
 C00C C00J C00K C00I 0.2(7) . . . . ?
 C00D C00C C00H N006 -178.1(3) . . . . ?
 C00D C00C C00J C00K 178.1(4) . . . . ?
 C00E C00A C00B C00F 0.1(5) . . . . ?
 C00E C00D C00G C00F -0.4(5) . . . . ?
 C00G C00D C00E C00A 3.0(5) . . . . ?
 C00H N006 C00I C00K 0.9(6) . . . . ?
 C00H C00C C00D C00E -44.4(5) . . . . ?
 C00H C00C C00D C00G 133.8(4) . . . . ?
 C00H C00C C00J C00K 0.3(6) . . . . ?
 C00I N006 C00H C00C -0.4(5) . . . . ?
 C00J C00C C00D C00E 137.9(4) . . . . ?
 C00J C00C C00D C00G -43.9(5) . . . . ?
 C00J C00C C00H N006 -0.2(5) . . . . ?

loop_
  _refln_index_h
  _refln_index_k
  _refln_index_l
  _refln_F_squared_meas
  _refln_F_squared_sigma
  _refln_scale_group_code
 0 0 -1 14.0609 10.8103 1
 0 0 1 21.3716 11.5728 1
 0 0 -2 367077 11886.1 1
 0 0 2 360981 11886.3 1
 0 0 3 9.9342 41.3762 1
 0 0 -3 65.4376 46.2814 1
 0 0 4 5437.45 228.324 1
 0 0 -4 5724.89 231.375 1
 0 0 5 37.5074 55.0859 1
 0 0 6 2173.95 135.857 1
 0 0 7 81.6602 97.7276 3
 0 0 8 23493.8 937.706 3
 0 0 8 24640.7 934.768 7
 0 0 9 72.0593 122.303 3
 0 0 9 218.52 119.973 7
 0 0 10 5711.65 374.643 3
 0 0 10 5776.44 360.817 7
 0 0 11 -37.8712 166.207 3
 0 0 11 70.1822 134.848 7
 0 0 12 1018.47 221.528 3
 0 0 12 1528.95 218.616 7
 0 0 13 -57.1906 137.758 7
 0 0 13 65.2695 190.967 3
 0 0 -13 -23.8497 175.146 5
 0 0 14 4375.84 316.798 7
 0 0 -14 3821.24 349.32 5
 0 0 -15 -20.2591 157.942 5
 0 0 -16 509.029 153.141 5
 0 0 -17 -51.515 85.809 5
 0 -1 0 26.6602 24.9358 2
 0 1 -1 79111.7 2588.72 2
 0 -1 1 78443.3 2588.11 2
 0 -1 -2 140744 4621.27 1
 0 1 -2 140630 4621.02 2
 0 -1 -3 13051.2 465.175 1
 0 -1 3 12560.2 453.844 1
 0 -1 -4 55346.5 1827.91 1
 0 -1 4 53308.2 1810.44 1
 0 -1 5 9251.34 361.29 1
 0 -1 -5 9810.43 382.288 1
 0 -1 -6 24692.6 889.556 1
 0 1 -6 23827.6 912.461 2
 0 -1 6 25143.3 867.843 1
 0 -1 7 42917.2 1454.94 1
 0 -1 7 41702.8 1512.99 3
 0 1 7 39193.6 1515.84 3
 0 -1 -7 44573.8 1491.39 1
 0 1 7 42448.6 1523.68 7
 0 1 -7 42918.1 1522.04 2
 0 1 8 43.9647 106.656 6
 0 -1 8 -10.6713 92.0922 7
 0 -1 8 105.68 110.259 3
 0 1 8 12.7009 108.976 7
 0 1 -8 -78.0293 84.2266 2
 0 1 8 -25.5938 119.577 3
 0 1 9 7281.78 413.06 3
 0 -1 9 6784.89 374.493 7
 0 -1 9 7303.55 400.511 3
 0 1 9 7843.33 415.884 7
 0 -1 10 2454.73 253.049 3
 0 1 10 2893.86 278.544 3
 0 -1 10 3067.52 240.964 7
 0 1 10 3398.82 278.546 7
 0 -1 11 2417.27 247.776 3
 0 1 11 2429.7 261.98 7
 0 -1 11 2159.67 221.195 7
 0 1 11 2616.79 284.943 3
 0 1 -12 305.459 182.516 5
 0 1 12 667.07 209.536 3
 0 -1 12 556.78 185.717 3
 0 1 12 493.749 192.086 7
 0 -1 12 637.084 154.544 7
 0 1 13 2350.96 268.132 7
 0 1 -13 2368.7 281.713 5
 0 1 13 2605.67 305.096 3
 0 -1 -14 1301.19 256.332 5
 0 1 14 1364.09 254.114 3
 0 1 -14 1205.9 207.289 5
 0 1 14 1086.55 217.623 7
 0 1 -15 1767.64 222.751 5
 0 -1 -15 1798.11 259.681 5
 0 1 15 1354.44 198.93 7
 0 1 -16 4171.15 277.081 5
 0 -1 -16 3576.7 296.961 5
 0 -1 -17 696.079 130.787 5
 0 -2 0 88.6851 48.0587 2
 0 2 -1 30867.7 1030.12 2
 0 -2 1 30235.9 1028.02 2
 0 2 -2 25052.6 862.918 2
 0 2 -3 32434.2 1109.24 2
 0 -2 -3 31804.9 1113.66 1
 0 -2 -4 7612.95 326.197 1
 0 2 -4 7786.23 328.802 2
 0 -2 5 23286 840.322 1
 0 -2 -5 24398.4 869.113 1
 0 2 -5 23934.8 872.461 2
 0 -2 6 18683.6 678.782 1
 0 2 6 18022.7 735.879 7
 0 2 -6 19110.5 728.907 2
 0 2 6 18838.2 733.286 3
 0 -2 -6 18829.6 713.949 1
 0 2 7 25556.4 991.019 3
 0 2 7 26220.1 978.564 6
 0 2 7 26628.6 1001.65 7
 0 2 -7 25257.7 982.212 2
 0 -2 7 25798 918.015 1
 0 -2 -7 25803.6 961.213 1
 0 2 8 4571.3 298.717 3
 0 2 8 3938.62 287.981 7
 0 2 -8 4360.7 278.078 2
 0 2 8 4573.95 278.179 6
 0 -2 8 4102.56 263.851 3
 0 -2 -8 4429.89 265.406 1
 0 2 9 486.544 164.034 7
 0 -2 9 479.611 139.034 3
 0 2 9 736.57 154.113 6
 0 -2 10 77.0098 133.707 3
 0 2 -10 85.3628 134.988 5
 0 2 10 92.4647 150.165 7
 0 -2 11 898.648 173.16 3
 0 2 11 1217.81 217.407 7
 0 2 12 485.744 193.334 7
 0 2 -12 463.314 167.411 5
 0 2 13 2504.81 290.697 7
 0 2 -13 2188.2 252.354 5
 0 2 14 21.0551 160.649 7
 0 2 -14 147.413 135.33 5
 0 2 14 -88.4376 200.434 3
 0 -2 -15 4255.11 361.013 5
 0 2 -15 3752.5 282.799 5
 0 2 15 4121.02 320.822 7
 0 -2 -16 240.048 149.155 5
 0 2 16 357.409 129.424 7
 0 -2 -17 3715.99 253.039 5
 0 -3 0 -3.1256 57.0365 2
 0 -3 1 3442.55 157.136 2
 0 -3 2 17249.5 618.467 2
 0 3 -2 17463.2 624.223 2
 0 3 -3 1859.97 130.124 2
 0 -3 -3 1640.01 137.216 1
 0 -3 -4 1094.66 120.259 1
 0 3 -4 1105.54 110.87 2
 0 -3 -5 10980.9 456.963 1
 0 3 -5 10028.4 437.106 2
 0 -3 6 8733.54 387.626 1
 0 3 6 9375.26 435.894 3
 0 3 6 9283.66 446.295 7
 0 3 -6 9966.45 432.418 2
 0 -3 -6 10297.8 441.071 1
 0 3 6 9329.01 436.049 6
 0 3 7 4276.68 274.176 6
 0 -3 -7 3987.21 256.784 1
 0 3 -7 3869.63 252.542 2
 0 -3 7 4023.08 212.823 1
 0 3 7 4379.03 277.799 3
 0 -3 -8 4478.37 278.993 1
 0 3 8 3854.71 306.575 7
 0 3 -8 3933.85 262.641 5
 0 3 8 4377.85 286.461 6
 0 3 8 4215.47 299.261 3
 0 3 9 -44.6363 145.049 6
 0 3 9 150.092 140.586 3
 0 3 -9 84.2728 107.964 5
 0 3 9 53.4251 150.123 7
 0 3 -10 5055.82 330.438 5
 0 3 10 4630.86 362.753 3
 0 3 10 4777.51 337.797 6
 0 3 10 4997.27 373.279 7
 0 3 11 3751.13 358.96 7
 0 3 11 4640.99 369.492 3
 0 3 -11 4035 300.276 5
 0 3 12 6413.99 450.647 3
 0 3 12 5918.33 447.678 7
 0 3 -12 6361.91 389.033 5
 0 3 13 1089.88 247.336 7
 0 3 -13 910.788 169.862 5
 0 3 14 5146.91 399.922 7
 0 -3 -15 20.9121 186.637 5
 0 3 15 218.012 166.456 7
 0 -3 -16 3093.17 276.399 5
 0 3 16 2969.92 240.947 7
 0 -3 -17 293.266 104.873 5
 0 -4 0 15533.1 562.742 2
 0 -4 1 961.624 85.2251 2
 0 -4 -1 963.815 84.8845 2
 0 -4 2 4474.7 206.754 2
 0 4 -3 86.8327 68.1998 2
 0 4 4 19825.3 792.459 6
 0 -4 -4 20191.6 788.237 1
 0 4 -4 20580.2 758.32 2
 0 4 -5 4707.48 254.503 2
 0 4 5 4892.77 291.216 6
 0 4 5 4888.34 285.818 7
 0 -4 -5 4367.28 281.863 1
 0 4 5 4591.87 261.374 3
 0 4 6 4654.43 300.654 7
 0 -4 -6 5215.77 301.449 1
 0 4 6 4904.51 288.274 3
 0 4 -6 4868.55 273.759 2
 0 4 6 4111 295.211 6
 0 4 7 3924.49 282.648 6
 0 -4 -7 4042.34 276.283 1
 0 4 7 3954.04 291.371 7
 0 4 7 3708.51 269.536 3
 0 4 -7 3608.87 245.493 2
 0 4 8 10625.7 540.146 6
 0 4 8 10649.3 534.046 3
 0 4 8 10901.9 557.986 7
 0 4 9 10681.4 547.048 6
 0 4 9 10511.9 550.651 3
 0 4 10 6650.63 434.624 3
 0 4 10 6817.8 423.044 6
 0 4 11 9381.81 581.827 7
 0 4 11 10785.4 581.909 3
 0 4 11 10021.1 544.425 6
 0 4 12 8408.27 536.681 7
 0 4 12 7415.98 500.025 3
 0 4 13 3123.69 348.027 7
 0 4 13 3806.77 350.015 3
 0 4 14 280.736 181.125 3
 0 4 14 358.618 201.209 7
 0 4 15 1253.21 207.755 7
 0 4 16 278.476 129.675 7
 0 -5 0 9.88533 50.0964 2
 0 5 0 -87.2208 111.874 6
 0 -5 -1 6112.72 257.841 2
 0 -5 1 5675.41 252.327 2
 0 5 -1 5259.55 317.688 6
 0 -5 -2 4158.71 208.157 2
 0 5 -2 4196.12 269.319 6
 0 -5 -3 11337.4 510.383 1
 0 5 3 11047.4 511.691 6
 0 5 3 10789.8 479.202 7
 0 5 4 3062.65 248.753 6
 0 5 -4 3221.59 192.189 2
 0 -5 -4 3204.01 237.473 1
 0 5 4 2930.62 220.967 7
 0 5 5 24281.9 959.358 6
 0 5 5 24254.4 911.473 3
 0 -5 -5 24899.9 968.04 1
 0 5 -5 23285.5 899.882 2
 0 5 5 22939.1 940.061 7
 0 5 6 1515.73 191.791 7
 0 5 -6 1276.8 135.242 2
 0 5 6 1542.08 203.511 6
 0 5 6 1422.52 164.581 3
 0 5 7 19511.2 851.696 7
 0 5 7 19746.9 817.899 3
 0 5 7 19787.3 847.993 6
 0 5 8 1300.65 218.106 6
 0 5 8 1175.64 189.38 3
 0 5 8 782.222 197.311 7
 0 5 9 8542.81 484.026 3
 0 5 9 7967.29 489.335 6
 0 5 9 9111.21 530.784 7
 0 5 10 3720.66 321.15 3
 0 5 10 3524.45 326.545 6
 0 5 10 3340.63 337.815 7
 0 5 11 8055.93 489.226 6
 0 5 11 8464.78 508.609 3
 0 5 12 1823.44 265.638 3
 0 5 12 1345.5 218.119 6
 0 5 13 3818.06 367.367 7
 0 5 13 3789.19 330.636 3
 0 5 14 -137.588 173.537 7
 0 -5 -15 442.563 162.857 5
 0 5 15 625.381 162.018 7
 0 -5 -16 80.1158 108.044 5
 0 5 16 129.606 107.216 7
 0 -6 0 16798.1 627.333 2
 0 6 0 17752.9 738.129 6
 0 6 -1 2333.5 231.263 6
 0 -6 1 2239.85 136.288 2
 0 6 -2 25930.1 1036.33 6
 0 6 3 267.401 164.4 6
 0 6 3 68.8352 102.424 7
 0 6 -3 73.1912 138.825 6
 0 6 4 42651.8 1573.47 7
 0 6 4 43590.6 1617.56 6
 0 6 5 149.43 135.549 7
 0 6 5 148.59 161.009 6
 0 6 6 30161.7 1180.26 7
 0 6 6 29391.5 1189.21 6
 0 6 6 29122 1121.91 3
 0 6 7 780.351 154.445 3
 0 6 7 487.438 180.295 7
 0 6 8 2779.5 307.978 6
 0 6 8 3098.82 272.796 3
 0 6 9 1332.95 234.408 6
 0 6 9 1466.54 201.694 3
 0 6 9 735.34 224.513 7
 0 6 10 4915.42 362.202 3
 0 6 10 4837.97 405.512 7
 0 6 10 5663.03 397.695 6
 0 6 11 231.434 178.631 3
 0 6 11 176.164 178.556 6
 0 6 11 425.809 230.743 7
 0 6 12 3429.42 301.917 3
 0 6 12 3517.99 362.696 7
 0 6 12 2938.39 278.238 6
 0 6 13 151.334 155.653 3
 0 -6 -14 1527.86 206.828 5
 0 6 15 591.666 148.707 7
 0 -6 -15 1079.22 153.354 5
 0 7 0 -51.0275 161.267 6
 0 7 -1 4218.52 326.767 6
 0 7 1 3545.84 314.762 6
 0 7 -2 3938.21 323.801 6
 0 7 -3 10477.6 568.874 6
 0 7 3 11037.3 506.891 7
 0 7 3 10517.9 570.995 6
 0 7 4 117.137 119.797 7
 0 7 4 300.149 191.802 6
 0 7 -4 237.273 177.213 6
 0 7 5 11994.1 636.584 6
 0 7 -5 11447.2 613.264 6
 0 7 5 12745.6 598.476 7
 0 7 6 3862.2 317.08 7
 0 7 6 4794.52 377.812 6
 0 7 -6 5199.99 376.182 6
 0 7 7 7445.5 488.579 6
 0 7 7 6602.46 435.326 7
 0 7 -7 6984.87 453.868 6
 0 7 8 -21.3191 194.27 6
 0 7 -8 196.567 165.693 6
 0 7 8 -91.054 119.145 3
 0 7 8 256.663 185.641 7
 0 7 9 1967.29 265.156 7
 0 7 9 2577.52 289.073 6
 0 7 -9 1921.3 251.789 6
 0 7 9 2170.34 225.58 3
 0 7 10 1807.94 278.745 7
 0 7 10 1817.97 253.452 6
 0 7 -10 2046.84 237.639 6
 0 7 10 1872.31 220.146 3
 0 7 11 2538.45 240.839 3
 0 7 11 2227.98 288.124 7
 0 7 11 1961.66 254.237 6
 0 7 12 2911.3 303.048 7
 0 7 12 2478.04 246.704 6
 0 -7 -13 1372.19 193.757 5
 0 7 13 1676.65 235.554 7
 0 7 14 2083.06 212.368 7
 0 -7 -14 1953.57 186.389 5
 0 7 15 -54.4444 80.9826 7
 0 8 0 2699.37 303.922 6
 0 8 1 877.735 237.192 6
 0 8 -1 1030.64 225.758 6
 0 8 -2 223.731 197.501 6
 0 8 -3 5282.2 403.373 6
 0 8 4 -121.38 112.333 7
 0 8 4 -107.983 217.071 6
 0 8 -4 103.93 196.142 6
 0 8 -5 4628.79 379.189 6
 0 8 5 4183.34 388.096 6
 0 8 5 4130.7 310.281 7
 0 8 -6 2694.93 296.068 6
 0 8 6 2881.83 334.584 6
 0 8 6 2586.57 260.015 7
 0 8 -7 492.105 193.902 6
 0 8 7 473.293 173.581 7
 0 8 7 200.582 198.208 6
 0 8 -8 663.012 192.457 6
 0 8 8 757.702 210.662 7
 0 8 8 848.08 250.03 6
 0 8 9 1892.45 273.059 6
 0 8 -9 1705.23 226.85 6
 0 8 9 1381.69 231.972 7
 0 8 -10 240.869 144.279 6
 0 8 10 260.901 181.817 6
 0 8 10 199.103 170.007 7
 0 8 11 3192.22 293.838 7
 0 8 11 2735.97 263.463 6
 0 -8 -12 364.636 118.696 5
 0 8 12 393.963 159.518 7
 0 8 13 4467.06 288.899 7
 0 8 14 17.2544 73.5929 7
 0 9 0 67.8592 231.17 6
 0 9 -1 3667.19 367.429 6
 0 9 1 3402.12 360.801 6
 0 9 -2 1995.21 296.85 6
 0 9 -3 -22.2151 203.473 6
 0 9 4 1480.64 296.22 6
 0 9 -4 2106.59 290.938 6
 0 9 5 1381.34 278.214 6
 0 9 -5 1693.64 264.23 6
 0 9 6 1383.4 188.601 7
 0 9 -6 1071.4 235.489 6
 0 9 6 1220.88 269.366 6
 0 9 7 2403.19 304.147 6
 0 9 -7 1906.41 261.154 6
 0 9 7 2265.38 239.213 7
 0 9 8 653.506 165.38 7
 0 9 8 222.052 203.526 6
 0 9 -8 517.683 174.913 6
 0 9 9 759.245 199.166 6
 0 9 -9 623.866 160.967 6
 0 9 9 709.365 164.504 7
 0 9 10 3082.28 270.914 6
 0 9 10 2812.39 250.172 7
 0 9 11 244.985 125.241 7
 0 9 11 84.683 132.077 6
 0 9 12 1813.96 164.477 7
 0 10 0 1100.29 283.638 6
 0 10 -1 -22.6284 226.475 6
 0 10 1 207.248 246.643 6
 0 10 -2 1309.65 283.328 6
 0 10 -3 -108.165 210.904 6
 0 10 4 1159.84 295.859 6
 0 10 -4 914.829 235.54 6
 0 10 -5 2373.38 282.336 6
 0 10 5 2650.76 320.643 6
 0 10 6 7638.99 487.926 6
 0 10 -6 7415.85 453.427 6
 0 10 -7 1169.96 197.896 6
 0 10 7 1436.56 248.805 6
 0 10 -8 2503.51 220.668 6
 0 10 8 2227.52 254.081 6
 0 10 9 221.826 145.87 6
 0 10 10 215.822 114.053 6
 0 11 0 20.1046 192.412 6
 0 11 -1 2968.84 314.505 6
 0 11 1 2760.9 310.351 6
 0 11 -2 268.409 206.134 6
 0 11 2 -19.9664 222.478 6
 0 11 -3 2642.78 280.701 6
 0 11 -4 219.928 168.734 6
 0 11 -5 6142.12 376.424 6
 0 11 5 6197.59 406.834 6
 0 11 -6 -13.0383 124.785 6
 0 11 6 78.7213 161.556 6
 0 11 -7 1409.54 160.123 6
 0 11 7 1795.26 210.934 6
 0 11 8 67.5497 115.544 6
 0 11 9 662.022 114.672 6
 0 12 0 3108.14 272.66 6
 0 12 1 118.328 161.367 6
 0 12 -1 57.3271 148.869 6
 0 12 -2 3200.35 258.743 6
 0 12 2 3209.51 277.137 6
 0 12 -3 124.253 127.563 6
 0 12 -4 914.477 145.182 6
 0 12 5 423.805 141.115 6
 0 12 -5 344.511 104.41 6
 0 12 6 862.036 137.034 6
 0 12 7 97.2248 78.0437 6
 0 13 0 15.692 80.8374 6
 0 13 1 611.248 106.145 6
 0 13 -1 419.088 88.3463 6
 0 13 2 129.88 77.8704 6
 1 0 -17 -80.1663 102.217 5
 1 0 -16 2787.52 262.833 5
 -1 0 15 255.302 178.117 3
 1 0 -15 103.877 162.063 5
 -1 0 14 8972.52 528.179 3
 -1 0 14 8433.51 465.57 7
 -1 0 13 71.9148 126.696 7
 -1 0 13 -211.64 178.404 3
 -1 0 12 11117.5 592.903 3
 -1 0 12 10724.6 552.751 7
 -1 0 11 36.078 144.558 3
 -1 0 11 96.6282 131.616 7
 -1 0 10 18174.7 777.23 3
 -1 0 10 17145 745.819 7
 -1 0 9 -24.582 97.8257 7
 -1 0 9 81.2742 125.953 3
 -1 0 8 73708.3 2551.68 3
 -1 0 8 72736.2 2534.82 7
 1 0 -8 74661.1 2560.68 2
 1 0 -7 -78.7473 77.3206 2
 1 0 -6 49201 1709.42 2
 1 0 -5 41.2259 41.7588 1
 1 0 -5 49.887 82.8204 2
 1 0 -4 171744 5558.48 2
 1 0 -4 167421 5512.72 1
 1 0 -3 15.0664 20.4918 1
 1 0 -3 -3.52294 66.6419 2
 1 0 -2 171396 5643.03 2
 -1 0 2 172897 5642.52 2
 -1 0 1 59.7474 36.1315 2
 1 0 -1 24.3919 36.8176 2
 1 0 0 159079 5210.96 1
 1 0 2 30814.4 1140.96 1
 -1 0 -2 37244.5 1150.82 1
 -1 0 -3 68.6114 65.7043 1
 1 0 3 -17.7416 68.5505 1
 1 0 4 1009.75 102.172 1
 1 0 5 25.7956 78.2563 1
 1 0 6 14661 577.732 1
 1 0 7 22.87 106.341 3
 1 0 7 136.474 88.6028 1
 1 0 7 -11.4129 98.5079 7
 1 0 8 508.254 132.673 7
 1 0 8 554.628 145.367 3
 1 0 9 47.3798 134.724 3
 1 0 9 -92.8123 126.406 7
 1 0 10 158.257 138.318 7
 1 0 10 435.822 174.008 3
 1 0 11 -135.292 141.951 7
 1 0 11 101.581 185.141 3
 -1 0 -12 361.962 204.633 5
 1 0 12 -130.913 172.49 3
 1 0 12 81.0654 158.01 7
 -1 0 -13 -96.8304 192.752 5
 1 0 13 -219.733 153.626 7
 1 0 14 319.72 151.708 7
 -1 0 -14 112.13 182.234 5
 -1 0 -15 189.907 154.305 5
 -1 0 -16 198.451 127.993 5
 -1 0 -17 -57.621 78.0633 5
 1 -1 -17 1566.19 181.079 5
 1 1 -16 1674.86 192.018 5
 1 -1 -16 1736.56 226.105 5
 1 -1 -15 4222.07 357.069 5
 1 1 -15 3493.79 305.755 5
 -1 1 15 4514.56 372.708 3
 -1 1 15 4065.17 301.64 7
 -1 -1 14 1144.63 223.66 3
 -1 1 14 1008.58 197.549 7
 1 1 -14 1292.99 223.039 5
 -1 1 14 1080.15 260.582 3
 -1 1 13 6469.78 458.239 3
 -1 -1 13 6391.52 421.963 3
 -1 1 13 6010.71 409.759 7
 1 1 -13 6035.51 418.856 5
 -1 1 12 -155.561 163.908 7
 -1 -1 12 18.8546 145.955 3
 -1 1 12 146.405 188.612 3
 -1 -1 11 12179.8 608.042 3
 -1 1 11 12681.6 629.647 3
 -1 1 11 12492.5 615.037 7
 -1 1 10 599.536 157.292 7
 -1 -1 10 570.008 157.832 3
 -1 1 10 829.973 182.952 3
 -1 -1 9 43447.9 1588.75 3
 -1 1 9 44075.3 1601.36 7
 -1 1 9 43364 1610.34 3
 -1 -1 8 4590.57 283.533 3
 -1 1 8 4631.75 293.98 3
 -1 1 8 4423.03 281.228 7
 1 -1 -8 5043.6 238.958 1
 1 -1 -8 5250.37 295.172 2
 -1 1 7 3337.86 226.08 3
 1 -1 -7 3379.73 180.882 1
 1 -1 -6 998.457 91.1284 1
 1 -1 -5 23854.9 831.782 1
 -1 -1 4 10686.2 380.207 1
 1 -1 -4 15249.7 426.487 1
 -1 -1 2 140869 4603.44 1
 -1 -1 1 205950 6845.21 1
 1 -1 -1 210831 6832.22 2
 1 1 0 13035.2 465.9 1
 -1 -1 0 13728 468.765 1
 1 1 2 19432.9 698.619 1
 -1 -1 -2 20137 701.733 1
 1 1 3 74528.5 2337.65 1
 -1 -1 -3 71179 2338.72 1
 1 -1 4 22813.4 849.989 1
 -1 -1 -4 25079.9 866.701 1
 1 1 4 24124.5 860.282 1
 1 1 5 30640.1 1077.98 1
 1 -1 5 29878.2 1069.03 1
 -1 -1 -5 30066.9 1081.22 1
 1 1 6 65456.7 2283.61 7
 1 -1 6 67419.5 2250.41 1
 1 1 6 64486.4 2258.03 1
 -1 -1 -6 66146.8 2268.69 1
 1 1 7 21290.9 852.47 6
 1 -1 7 21241.2 845.853 7
 1 -1 7 22425.8 824.688 1
 1 1 7 22188.8 869.321 7
 1 -1 7 21854 855.623 3
 1 1 8 3542.61 264.163 6
 -1 1 -8 3565.45 253.963 2
 1 1 8 4282.44 287.345 7
 1 -1 8 3397.8 260.346 3
 1 -1 8 3626.82 260.245 7
 1 -1 8 4102.68 233.096 1
 1 1 9 1060.36 194.79 3
 1 -1 9 802.263 173.643 3
 1 -1 9 858.211 163.435 7
 1 1 9 811.487 180.294 7
 1 -1 10 1652.88 200.716 7
 1 1 10 1550.68 238.412 3
 -1 1 -10 1659.42 235.747 5
 1 -1 10 1520.85 212.19 3
 1 1 10 1256.25 206.119 7
 -1 1 -11 109.012 166.447 5
 1 -1 11 137.648 167.839 3
 1 -1 11 142.601 136.126 7
 1 1 11 125.173 185.233 3
 1 1 11 413.412 172.224 7
 -1 1 -12 1356.94 242.287 5
 1 1 12 1460.26 233.479 7
 1 1 12 1254.22 251.107 3
 1 -1 12 1051.38 185.121 7
 1 1 13 452.546 184.46 7
 -1 1 -13 363.932 184.103 5
 -1 -1 -13 626.101 234.519 5
 1 -1 13 490.68 156.271 7
 1 1 14 412.392 173.92 7
 -1 -1 -14 303.4 208.734 5
 -1 1 -14 583.167 185.39 5
 -1 1 -15 17.1955 140.517 5
 -1 -1 -15 198.064 175.775 5
 1 1 15 -15.786 128.17 7
 -1 -1 -16 1684.5 201.899 5
 -1 1 -16 1586.19 172.337 5
 -1 -1 -17 168.46 93.4221 5
 1 -2 -17 1865.15 197.46 5
 1 -2 -16 2049.47 257.191 5
 -1 2 16 2113.68 207.894 7
 -1 2 15 1544.98 225.575 7
 -1 2 15 1751.77 272.169 3
 1 2 -14 764.369 170.729 5
 -1 2 14 963.994 212.385 7
 -1 2 14 828.039 236.755 3
 -1 2 13 414.74 190.871 7
 -1 -2 13 435.03 159.511 3
 -1 2 13 475.783 219.148 3
 1 2 -13 209.178 136.761 5
 -1 2 12 1712 246.586 7
 1 2 -12 1551.31 217.338 5
 -1 -2 12 1625.36 215.884 3
 -1 2 12 1452.11 256.533 3
 -1 2 11 175.486 163.364 7
 -1 -2 11 -63.8881 134.632 3
 -1 2 10 4010.85 311.634 7
 -1 -2 10 3975.59 281.364 3
 -1 2 10 3386.14 258.378 6
 -1 2 9 3831.51 282.389 7
 -1 2 9 3450.57 244.44 6
 -1 -2 9 3425.85 251.943 3
 -1 -2 8 981.454 133.163 3
 -1 2 8 1004.85 137.164 6
 1 2 -8 1261.93 149.048 2
 1 -2 -8 1285.2 132.007 1
 -1 2 8 1153.7 167.343 7
 -1 2 7 56.7474 96.8352 7
 1 2 -7 164.28 90.0888 2
 -1 2 7 43.4668 106.423 3
 1 -2 -7 15.0443 74.3384 1
 1 2 -6 625.303 110.457 2
 -1 -2 6 358.968 38.8458 1
 1 -2 -6 604.343 97.1028 1
 -1 -2 5 1380.73 77.0773 1
 1 2 -5 1539.69 136.509 2
 1 -2 -5 1426.58 115.379 1
 1 2 -4 1549.78 132.074 2
 1 2 -3 888.93 109.122 2
 -1 -2 3 885.957 95.1226 2
 -1 -2 2 120164 4007.41 2
 1 2 -2 122217 4007.89 2
 -1 -2 1 1872.9 113.001 2
 -1 -2 0 20625.8 721.783 1
 -1 2 -1 4994.85 191.396 2
 -1 2 -2 2521.48 121.615 2
 -1 -2 -2 1877.25 134.625 1
 -1 -2 -3 45744 1573.55 1
 -1 2 -3 45612.1 1548.33 2
 -1 2 -4 5871.13 266.396 2
 -1 -2 -4 5874.06 285.94 1
 -1 -2 -5 82799.9 2817.98 1
 1 -2 5 81963.4 2798.27 1
 -1 2 -5 84058.2 2805.77 2
 1 -2 6 39014 1380.58 1
 1 2 6 39572.3 1413.94 6
 -1 2 -6 39390.3 1401.39 2
 1 2 6 38718.5 1412.43 3
 -1 -2 -6 39148.3 1406.27 1
 1 2 7 15953.8 648.325 6
 -1 2 -7 14289.9 621.72 2
 1 -2 7 14623.2 620.879 3
 1 2 7 15161.6 643.649 3
 1 -2 7 14642.7 594.456 1
 -1 -2 -7 15485.3 634.062 1
 -1 2 -7 14358.8 634.368 5
 1 -2 7 14740.9 611.114 7
 1 2 7 14818.5 649.054 7
 1 -2 8 9423.77 467.526 3
 1 2 8 10139 505.835 7
 -1 -2 -8 9923.8 473.234 1
 -1 2 -8 10162.7 491.341 5
 1 2 8 10329.2 490.781 6
 1 2 8 8991.35 480.583 3
 1 -2 8 8706.94 446.148 7
 1 2 9 8149.28 458.153 6
 -1 2 -9 8391.05 464.459 5
 1 -2 9 7612 419.807 7
 1 2 9 8492.28 475.256 7
 1 2 9 9374.37 486.285 3
 1 2 10 943.785 215.449 7
 1 -2 10 901.74 160.014 7
 -1 2 -10 855.492 190.065 5
 1 2 11 3792.98 349.218 7
 -1 2 -11 3626.81 322.456 5
 1 2 12 275.808 200.858 7
 -1 2 -12 320.647 164.583 5
 -1 -2 -13 2993.8 352.525 5
 -1 2 -13 3391.09 310.209 5
 1 2 13 3892.15 356.736 7
 -1 2 -14 293.209 149.09 5
 1 2 14 430.694 192.82 7
 -1 -2 -14 140.663 206 5
 -1 -2 -15 9722.21 526.958 5
 -1 2 -15 8295.56 443.599 5
 1 2 15 8535.39 475.44 7
 1 2 16 400.282 119.729 7
 -1 -2 -16 581.501 162.758 5
 -1 -2 -17 2418.91 177.427 5
 1 -3 -17 12.7302 112.358 5
 -1 3 17 8.77594 73.9743 7
 1 -3 -16 899.478 203.893 5
 -1 3 16 1121.63 173.746 7
 -1 3 15 170.578 167.373 7
 -1 3 14 1568.37 252.07 7
 -1 3 13 184.041 174.327 7
 -1 3 12 1219.41 249.623 7
 -1 3 12 1264.41 259.513 3
 -1 3 11 -76.3209 128.69 6
 -1 3 11 232.906 191.958 7
 -1 3 11 329.05 204.951 3
 -1 3 10 5030.81 355.102 3
 -1 3 10 4490.09 344.064 7
 -1 3 9 1531.76 179.006 6
 -1 3 9 1721.74 218.352 3
 -1 3 9 1550.94 212.611 7
 -1 3 8 1338.89 184.097 3
 -1 3 8 1511.09 170.917 6
 -1 3 8 1001.13 176.624 7
 1 -3 -8 1451.05 154.421 1
 1 3 -8 1128.99 151.336 2
 -1 -3 7 206.192 40.4343 1
 -1 3 7 259.253 119.689 3
 -1 3 7 226.135 105.759 6
 1 -3 -7 367.396 108.593 1
 1 3 -7 345.778 107.805 2
 1 -3 -6 983.96 129.274 1
 -1 3 6 1008.77 139.142 3
 1 3 -6 1018.78 126.755 2
 -1 -3 6 1019.44 84.1318 1
 1 3 -5 580.959 104.785 2
 1 -3 -5 579.928 105.276 1
 1 3 -4 7724.6 342.663 2
 1 3 -3 17278.5 639.593 2
 -1 -3 3 16977.4 634.047 2
 -1 -3 2 6586.01 274.673 2
 1 3 -2 6153.06 277.391 2
 -1 -3 1 21644.1 697.568 2
 1 -3 -1 18567.1 642.829 2
 -1 -3 0 350.968 74.713 2
 -1 -3 -1 3329.46 186.199 1
 -1 3 -1 3337.58 142.205 2
 -1 3 -2 1379.8 94.7045 2
 -1 3 -3 824.156 88.1503 2
 -1 -3 -3 1038.95 123.403 1
 -1 3 -4 18520.3 687.586 2
 -1 -3 -4 18530.1 720.627 1
 1 3 5 34852.1 1284.68 6
 1 3 5 36223.5 1291.73 7
 -1 -3 -5 36239.8 1287.29 1
 -1 3 -5 34148.3 1252.06 2
 1 -3 6 25509.5 957.453 1
 1 3 6 26367.9 983.615 3
 -1 3 -6 26628.1 968.704 2
 1 3 6 25794.6 997.606 7
 1 3 6 25757.7 992.419 6
 -1 -3 -6 25401 986.128 1
 -1 3 -6 24299.1 964.824 5
 1 3 7 1912.11 194.161 3
 -1 3 -7 1773.61 162.769 2
 -1 -3 -7 1829.15 184.777 1
 -1 3 -7 1529.25 171.017 5
 1 -3 7 1765.34 158.3 1
 1 3 7 1864.82 201.303 6
 1 3 8 36056.7 1371.15 3
 1 3 8 36784.4 1371.25 6
 -1 3 -8 34960.9 1347.77 5
 1 3 9 1209.16 218.966 7
 1 3 9 776.302 185.12 3
 1 3 9 698.985 174.839 6
 -1 3 -9 1202.91 178.113 5
 -1 3 -10 20696.9 895.846 5
 1 3 10 20819.9 926.322 3
 1 3 10 21650.1 948.657 7
 1 3 10 20200.9 905.826 6
 -1 3 -11 1274.46 204.846 5
 1 3 11 1450.79 249.423 3
 1 3 11 1454.43 253.99 7
 1 3 12 7445.09 502.935 7
 1 3 12 8533.11 524.491 3
 -1 3 -12 7635.8 455.955 5
 -1 3 -13 106.29 134.26 5
 1 3 13 222.714 211.211 3
 1 3 13 230.599 215.539 7
 1 3 14 7380.15 452.63 7
 -1 3 -14 5328.69 341.729 5
 1 3 15 284.71 147.293 7
 -1 -3 -16 4616.69 305.63 5
 1 3 16 4049.63 268.354 7
 -1 -3 -17 106.121 73.6959 5
 -1 4 17 57.791 82.6371 7
 1 -4 -17 32.9919 97.6065 5
 -1 4 16 599.433 149.467 7
 -1 4 15 332.403 179.54 7
 -1 4 15 347.541 178.646 3
 -1 4 14 2192.27 288.915 3
 -1 4 14 2193.85 287.496 7
 -1 4 13 1242.59 264.133 3
 -1 4 13 1434.41 257.459 7
 -1 4 12 13605.1 719.475 7
 -1 4 12 13128.7 693.426 3
 -1 4 11 1349.71 228.264 3
 -1 4 11 1384.17 241.26 7
 -1 4 11 1575.24 208.37 6
 -1 4 10 7524.19 461.533 7
 -1 4 10 6301.31 391.734 6
 -1 4 10 6685.62 434.473 3
 -1 4 9 427.37 152.525 6
 -1 4 9 891.9 186.136 3
 -1 4 8 8426.7 442.437 6
 -1 4 8 8884.52 464.65 3
 -1 4 7 559.503 142.345 6
 1 4 -7 237.471 90.5161 2
 -1 4 7 398.38 150.656 7
 -1 4 7 461.259 138.78 3
 1 -4 -7 400.685 118.768 1
 -1 4 6 3841.4 255.326 6
 1 4 -6 4239.79 255.129 2
 1 -4 -6 3804.88 252.072 1
 -1 4 6 3784.31 250.074 3
 -1 4 6 4072.53 273.221 7
 -1 4 5 1293.9 156.483 7
 -1 4 5 1342.63 142.195 3
 -1 4 5 1290.54 160.212 6
 1 -4 -5 1237.17 145.667 1
 1 4 -5 1397.14 140.185 2
 1 4 -4 1966.95 154.36 2
 1 4 -3 11084.7 459.551 2
 -1 -4 3 11387.1 455.757 2
 -1 -4 2 37577.2 1317.87 2
 1 -4 -2 37973.3 1270.8 2
 -1 -4 1 13230.5 465.907 2
 1 -4 -1 11230.9 402.417 2
 -1 -4 0 45302.8 1557.73 2
 -1 -4 -1 9105.8 405.257 1
 -1 4 -2 35747.3 1218.37 2
 -1 4 -3 7613.54 324.101 2
 -1 -4 -3 8468.34 388.998 1
 -1 4 -4 933.192 99.3716 2
 -1 -4 -4 1124.79 149.61 1
 1 4 4 1185.93 138.497 7
 1 4 4 1059.62 153.554 6
 1 4 5 19169.5 782.486 6
 -1 4 -5 18258.3 727.196 2
 1 4 5 19571.2 782.184 7
 1 4 5 18661.9 747.667 3
 -1 -4 -5 20780.7 799.27 1
 1 4 6 142.898 115.555 3
 1 4 6 13.6502 136.608 6
 1 -4 6 -10.9487 93.9421 1
 1 4 6 -55.9867 117.981 7
 -1 4 -6 42.1425 63.1741 2
 -1 -4 -6 -84.3897 118.556 1
 1 4 7 14128.1 643.942 7
 1 4 7 13722.1 608.708 3
 1 4 7 15123.3 648.668 6
 1 4 8 128.651 158.723 7
 1 4 8 235.199 158.631 6
 1 4 8 193.639 140.186 3
 1 4 9 13894.3 676.521 6
 1 4 9 14328.6 677.735 3
 -1 4 -9 13358.5 624.706 5
 1 4 10 378.493 196.741 6
 1 4 10 707.104 188.705 3
 1 4 11 12037.3 653.958 3
 1 4 11 13096.9 661.234 6
 1 4 12 960.743 270.223 7
 1 4 12 438.998 209.122 3
 -1 -4 -13 5584.26 444.236 5
 1 4 13 5811.9 435.685 7
 -1 -4 -14 209.764 195.22 5
 1 4 14 296.917 196.571 7
 -1 -4 -15 1622.61 216.184 5
 1 4 15 1681.6 213.563 7
 1 4 16 21.0258 91.2567 7
 -1 -4 -16 82.0499 111.137 5
 -1 5 16 466.396 134.92 7
 1 -5 -16 571.064 151.359 5
 -1 5 15 1506.98 214.365 3
 -1 5 15 1692.93 220.426 7
 -1 5 14 432.667 200.138 7
 -1 5 14 168.674 171.901 3
 -1 5 13 6929.6 457.574 3
 -1 5 13 7222.02 490.649 7
 -1 5 12 343.039 193.534 3
 -1 5 12 216.657 151.325 6
 -1 5 11 10241 557.185 3
 -1 5 11 8679.49 500.126 6
 -1 5 10 9602.6 522.201 6
 -1 5 10 9904.63 554.086 3
 -1 5 9 15352.7 704.84 3
 -1 5 9 15718.5 745.479 7
 -1 5 9 13675.8 675.005 6
 -1 5 8 95.594 142.198 6
 -1 5 8 112.728 159.355 7
 -1 5 8 111.255 129.918 3
 -1 5 7 15929.9 682.921 3
 -1 5 7 14523.8 702.201 7
 -1 5 7 16171.5 702.076 6
 1 5 -6 12.6961 68.4974 2
 -1 5 6 47.7389 105.915 3
 -1 5 6 -41.6783 125.285 6
 -1 5 6 -148.279 124.233 7
 -1 5 5 36473.9 1401.29 7
 -1 5 5 37894.4 1404.91 6
 1 -5 -5 38200.6 1409.3 1
 1 5 -5 38891 1379.4 2
 -1 5 5 37764 1366.78 3
 -1 5 4 8372.67 405.495 4
 1 5 -4 8495.48 419.568 6
 -1 5 4 9327.26 447.252 6
 1 5 -3 13758.8 586.692 6
 -1 5 3 13475.9 598.408 6
 -1 -5 3 13793.2 548.686 2
 1 -5 -3 13757 502.067 2
 1 -5 -2 66.9694 33.2576 2
 -1 5 2 103 119.34 6
 -1 -5 2 7.68506 55.1032 2
 1 5 -2 74.0413 110.3 6
 -1 -5 1 12176 447.091 2
 -1 5 1 11856.8 505.174 6
 1 5 -1 10984.3 482.764 6
 1 5 0 7538.39 392.679 6
 -1 -5 0 8537 360.071 2
 -1 -5 -1 6432.27 294.959 2
 -1 -5 -1 5701.5 320.134 1
 1 5 1 6036.37 333.912 6
 1 5 2 1700.77 187.757 6
 -1 -5 -2 2026.91 154.237 2
 -1 -5 -2 1754.1 178.045 1
 1 5 3 9616.85 436.796 7
 1 5 4 -80.6643 145.591 6
 -1 5 -4 -7.38962 45.3527 2
 -1 -5 -4 98.3115 116.224 1
 1 5 4 70.8935 97.1662 7
 1 5 5 13473 597.473 7
 1 5 5 13542.7 617.114 6
 1 5 5 12537.6 553.051 3
 1 5 6 1055.8 158.929 3
 1 5 6 1103.97 209.887 6
 1 5 6 1207.02 184.189 7
 1 5 7 2349.34 224.084 3
 1 5 7 2005.93 257.171 6
 1 5 7 2223.76 241.438 7
 1 5 8 1196.26 221.94 7
 1 5 8 1413.71 238.69 6
 1 5 8 1147.56 193.316 3
 1 5 9 2435.61 303.551 7
 1 5 9 2505.34 289.102 6
 1 5 9 2834.02 269.152 3
 1 5 10 4308.14 369.66 6
 1 5 10 4648.57 390.271 7
 1 5 10 4720.97 358.154 3
 1 5 11 1612.12 286.83 7
 1 5 11 1647.94 256.034 6
 1 5 11 1741.43 245.701 3
 1 5 12 3376.6 320.594 3
 -1 -5 -13 -64.7123 179.631 5
 1 5 14 323.639 180.101 7
 -1 -5 -14 163.041 160.946 5
 -1 -5 -15 354.759 134.369 5
 1 5 15 68.4769 131.248 7
 -1 -5 -16 177.95 78.1833 5
 1 5 16 142.92 78.3466 7
 1 -6 -16 309.898 97.687 5
 -1 6 16 450.37 104.489 7
 1 -6 -15 1093.24 178.716 5
 -1 6 15 1191.22 182.959 7
 -1 6 14 3082.9 266.29 3
 -1 6 13 537.689 177.145 3
 -1 6 12 2853.86 283.105 3
 -1 6 12 2435.17 245.461 6
 -1 6 11 19.8464 155.857 3
 -1 6 11 289.112 171.354 6
 -1 6 11 47.6494 195.961 7
 -1 6 10 6450.41 415.482 3
 -1 6 10 6335.8 460.426 7
 -1 6 10 5681.77 399.128 6
 -1 6 9 1793.08 264.437 7
 1 6 -9 1545.4 208.28 6
 -1 6 9 2131.28 237.838 3
 -1 6 9 1580.45 240.994 6
 -1 6 8 35929.7 1444.41 7
 -1 6 8 36729.1 1396.32 3
 -1 6 8 37015.9 1429.45 6
 1 6 -8 35459.2 1388.69 6
 -1 6 7 1011.61 184.462 7
 -1 6 7 493.612 186.367 6
 1 6 -7 845.045 187.243 6
 -1 6 7 831.336 154.291 3
 -1 6 6 58398.2 2098.71 6
 -1 6 6 56390.2 2033.24 3
 1 6 -6 57523.1 2073.78 6
 -1 6 6 57569.3 2091.46 7
 -1 6 5 1099.09 174.056 7
 -1 6 5 1037.72 208.023 6
 1 6 -5 1263.95 182.159 6
 -1 6 4 42562.6 1558.5 7
 -1 6 4 42208.3 1588.03 6
 1 6 -4 42582.3 1570.93 6
 -1 6 3 4409.14 318.103 6
 1 6 -3 4141.35 298.207 6
 -1 -6 3 4471.36 243.667 2
 -1 6 3 4590.6 278.02 7
 -1 6 2 16874.6 714.636 6
 1 6 -2 16202.9 696.73 6
 -1 -6 2 15668.7 633.352 2
 -1 -6 1 4724.85 251.21 2
 1 6 -1 4987.57 314.025 6
 -1 6 1 4819.11 327.432 6
 -1 -6 0 13808.2 557.723 2
 -1 -6 0 13629.6 609.166 1
 1 6 0 14042.2 625.954 6
 -1 -6 -1 1544.87 134.723 2
 1 6 1 1318.67 191.864 6
 -1 -6 -1 1171.45 164.468 1
 -1 6 -1 1347.53 204.92 6
 -1 -6 -2 4677.25 258.31 2
 1 6 2 4749.07 326.114 6
 1 6 3 161.478 98.5278 7
 1 6 4 1670.82 176.37 7
 1 6 5 1116.71 173.556 7
 1 6 5 1062.22 217.301 6
 1 6 6 3281.43 303.772 6
 1 6 6 3492.82 289.203 7
 1 6 7 296.699 195.615 6
 1 6 7 328.134 168.728 7
 1 6 7 249.489 129.855 3
 1 6 8 148.116 179.427 7
 1 6 8 166.278 210.658 6
 1 6 8 -98.7063 130.934 3
 1 6 9 304.392 150.677 3
 1 6 9 566.678 223.382 7
 1 6 9 575.953 214.856 6
 1 6 10 1835.28 276.528 6
 1 6 10 1648.02 222.286 3
 1 6 10 1755.46 285.473 7
 1 6 11 92.2836 204.797 7
 1 6 11 163.095 183.91 6
 1 6 11 167.612 152.255 3
 1 6 12 539.283 223.83 7
 -1 -6 -13 161.47 146.639 5
 1 6 13 18.853 179.619 7
 -1 -6 -14 168.381 121.91 5
 -1 -6 -15 242.82 89.3141 5
 1 -7 -15 1792.44 160.21 5
 -1 7 14 1713.61 205.142 7
 -1 7 13 1771.2 201.558 3
 -1 7 13 2056.88 247.415 7
 -1 7 12 2234.31 227.381 6
 -1 7 12 3104.23 310.502 7
 -1 7 12 2743.98 252.139 3
 -1 7 11 764.064 171.815 3
 -1 7 11 643.557 181.709 6
 -1 7 11 1077.13 248.711 7
 -1 7 10 2678.19 259.965 3
 -1 7 10 2868.91 322.615 7
 -1 7 9 248.474 202.649 7
 -1 7 9 100.46 172.419 6
 1 7 -9 99.6118 131.275 6
 -1 7 9 16.8158 132.964 3
 -1 7 8 366.03 200.585 7
 1 7 -8 313.474 163.201 6
 -1 7 8 610.137 221.395 6
 -1 7 8 345.32 136.02 3
 -1 7 7 30658.5 1237.96 6
 -1 7 7 27782.8 1213.67 7
 1 7 -7 31095.5 1209.36 6
 -1 7 6 3528.81 327.77 6
 1 7 -6 2780.86 280.931 6
 -1 7 6 3628.99 297.564 7
 -1 7 5 24759.9 1021.41 7
 -1 7 5 25574.4 1062.07 6
 1 7 -5 24453 1033.69 6
 -1 7 4 5221.26 379.836 6
 -1 7 4 5331.57 340.658 7
 1 7 -4 6159.12 394.413 6
 -1 7 3 11210.2 523.174 7
 -1 7 3 11867.5 596.94 6
 1 7 -3 9988.47 552.128 6
 1 7 -2 6506.21 412.895 6
 -1 7 2 7182.09 434.113 6
 1 7 -1 -49.462 151.788 6
 1 7 0 951.255 204.279 6
 1 7 1 2355.75 266.827 6
 -1 7 -1 2634.6 274.662 6
 -1 7 -2 6200.4 421.749 6
 1 7 2 6690.37 418.99 6
 -1 7 -3 6352.1 432.876 6
 1 7 4 6216.05 366.412 7
 -1 7 -4 6569.65 444.626 6
 1 7 5 6097.03 376.422 7
 1 7 5 5635.32 420.756 6
 1 7 6 4993.99 400.689 6
 1 7 6 4542.61 344.09 7
 1 7 7 21.764 237.112 6
 1 7 7 823.038 195.477 7
 1 7 8 2764.84 295.578 7
 1 7 8 2847.3 337.398 6
 1 7 9 477.843 229.278 6
 1 7 9 840.378 219.547 7
 -1 7 -10 1937.26 244.148 6
 1 7 10 1595.27 262.318 6
 1 7 10 1816.95 267.404 7
 -1 7 -11 436.295 161.428 6
 1 7 11 206.559 187.599 7
 1 7 11 374.946 187.164 6
 -1 -7 -12 2060.41 224.074 5
 1 7 12 2187.42 263.683 7
 1 7 13 227.64 143.928 7
 -1 -7 -13 50.6663 110.624 5
 -1 -7 -14 199.672 78.0241 5
 1 7 14 622.534 126.946 7
 -1 8 14 1335.15 151.606 7
 -1 8 13 448.782 144.924 7
 1 -8 -13 581.01 124.241 5
 -1 8 12 717.18 182.16 7
 -1 8 12 358.552 125.279 6
 -1 8 11 773.89 196.633 7
 -1 8 11 657.775 176.583 6
 -1 8 10 251.075 171.106 6
 -1 8 10 351.731 188.782 7
 1 8 -9 1537.54 202.858 6
 -1 8 9 1970.98 260.703 6
 -1 8 9 1804.35 257.722 7
 -1 8 8 2815.78 293.289 7
 1 8 -8 2976.81 271.075 6
 -1 8 8 3352.64 335.301 6
 1 8 -7 2496.13 269.924 6
 -1 8 7 3087.75 297.86 7
 -1 8 7 2823.23 327.257 6
 -1 8 6 850.161 246.457 6
 -1 8 6 1063.01 194.829 7
 1 8 -6 877.232 198.081 6
 -1 8 5 1709.57 270.242 6
 1 8 -5 1676.88 249.224 6
 -1 8 5 1844.61 215.886 7
 -1 8 4 910.418 163.471 7
 1 8 -4 1198.41 236.813 6
 1 8 -3 15739.2 760.612 6
 -1 8 3 15843.6 781.041 6
 1 8 -2 -97.3192 191.447 6
 -1 8 2 335.466 209.844 6
 1 8 -1 19529 890.087 6
 1 8 0 79.1346 184.881 6
 1 8 1 8753.44 518.671 6
 -1 8 -1 8611.11 531.083 6
 1 8 2 1098.49 243.887 6
 -1 8 -2 1181.08 244.546 6
 -1 8 -3 7357.91 500.517 6
 -1 8 -4 3152.86 348.634 6
 -1 8 -5 6292.18 472.962 6
 1 8 5 6403.52 387.846 7
 1 8 6 -127.171 139.631 7
 1 8 6 45.3123 219.855 6
 -1 8 -6 112.367 201.6 6
 1 8 7 540.52 168.595 7
 1 8 7 519.511 247.1 6
 -1 8 -7 682.597 222.097 6
 1 8 8 614.905 241.837 6
 1 8 8 536.103 179.82 7
 -1 8 -8 398.044 202.113 6
 1 8 9 5064.85 402.842 6
 1 8 9 6039.15 403.163 7
 -1 8 -9 5925.63 411.548 6
 1 8 10 521.084 200.809 6
 1 8 10 518.829 178.183 7
 -1 8 -10 550.473 169.036 6
 1 8 11 4904.7 337.575 6
 1 8 11 5420.18 351.561 7
 -1 8 -11 4303.78 286.525 6
 1 8 12 303.511 140.175 7
 1 8 13 2017.86 172.382 7
 -1 9 13 -16.5637 70.6471 7
 -1 9 12 93.1436 113.021 7
 -1 9 11 128.733 128.421 7
 -1 9 11 197.65 121.821 6
 -1 9 10 114.25 148.817 7
 -1 9 10 209.795 156.948 6
 -1 9 9 -35.5011 163.443 6
 -1 9 9 228.408 153.396 7
 -1 9 8 1249.18 204.503 7
 -1 9 8 1569.75 255.197 6
 1 9 -8 1598.35 204.547 6
 1 9 -7 2216.24 248.04 6
 -1 9 7 1781.31 226.759 7
 -1 9 7 2434.43 308.462 6
 -1 9 6 -156.157 213.51 6
 -1 9 6 -52.001 120.03 7
 1 9 -6 -19.0313 158.486 6
 -1 9 5 798.744 264.532 6
 1 9 -5 520.409 197.075 6
 -1 9 5 648.704 150.722 7
 -1 9 4 669.897 241.787 6
 1 9 -4 1157.71 233.07 6
 1 9 -3 210.924 193.269 6
 -1 9 3 116.235 224.623 6
 1 9 -2 106.958 181.416 6
 -1 9 2 46.4731 237.479 6
 1 9 -1 21.731 176.43 6
 1 9 0 110.357 205.258 6
 1 9 1 537.117 249.227 6
 -1 9 -1 651.431 251.773 6
 1 9 2 339.718 245.556 6
 -1 9 -2 395.387 239.923 6
 -1 9 -3 464.83 226.031 6
 1 9 3 457.672 258.012 6
 -1 9 -4 7819.2 516.417 6
 -1 9 -5 2056.38 301.009 6
 1 9 6 1298.97 289.55 6
 -1 9 -6 1043.62 242.614 6
 1 9 7 1127.68 175.262 7
 1 9 7 920.706 255.921 6
 -1 9 -7 954.715 225.689 6
 1 9 8 1208.66 255.357 6
 1 9 8 786.529 163.887 7
 -1 9 -8 1164.67 219.261 6
 1 9 9 477.177 197.812 6
 1 9 9 207.609 132.664 7
 -1 9 -9 306.659 151.111 6
 1 9 10 3678.09 266.88 7
 -1 9 -10 3668.34 255.351 6
 1 9 11 278.39 108.795 7
 1 9 11 185.032 119.874 6
 -1 10 10 691.564 138.186 6
 -1 10 10 773.706 119.692 7
 -1 10 9 123.049 134.678 6
 -1 10 9 292.839 102.909 7
 -1 10 8 1803.75 231.091 6
 -1 10 7 259.97 196.192 6
 1 10 -7 372.357 142.512 6
 -1 10 6 1238.07 252.174 6
 1 10 -6 1392.91 208.673 6
 -1 10 5 300.807 243.633 6
 1 10 -5 255.985 177.65 6
 -1 10 4 22.3083 265.924 6
 1 10 -4 1037.96 218.408 6
 1 10 -3 452.494 221.921 6
 -1 10 3 755.431 253.987 6
 1 10 -2 2405.02 316.2 6
 1 10 -1 3268.27 353.168 6
 -1 10 0 3494.52 386.265 6
 1 10 0 2829.14 336.393 6
 1 10 1 8063.86 537.572 6
 -1 10 -1 8203.1 549.096 6
 1 10 2 2434.58 318.376 6
 -1 10 -2 3038.76 338.585 6
 -1 10 -3 8186.14 538.271 6
 1 10 3 9209.64 563.127 6
 -1 10 -4 1115.17 249.688 6
 -1 10 -5 505.311 203.81 6
 1 10 6 867.437 242.435 6
 -1 10 -6 944.858 207.832 6
 1 10 7 432.603 194.849 6
 -1 10 -7 310.11 173.903 6
 -1 10 -8 -54.1676 135.524 6
 1 10 8 110.701 160.284 6
 -1 10 -9 260.663 111.143 6
 1 10 9 557.129 158.077 6
 1 10 10 436.303 126.751 6
 -1 11 9 1477.56 140.42 6
 -1 11 8 89.5027 116.688 6
 -1 11 7 2850.46 249.65 6
 1 11 -6 -11.7612 115.166 6
 -1 11 6 126.159 161.162 6
 -1 11 5 1572.26 232.351 6
 1 11 -5 1518.08 200.595 6
 -1 11 4 -37.381 193.397 6
 1 11 -4 284.65 154.915 6
 -1 11 3 5950.41 428.034 6
 1 11 -3 6418.48 403.298 6
 1 11 -2 508.65 195.267 6
 1 11 -1 4630.69 366.604 6
 -1 11 0 489.567 223.716 6
 1 11 0 345.687 210.672 6
 -1 11 -1 2228.63 293.85 6
 1 11 1 2782.4 300.082 6
 1 11 2 402.008 205.255 6
 -1 11 -2 194.379 202.104 6
 1 11 3 74.673 186.862 6
 -1 11 -3 147.801 188.063 6
 -1 11 -4 34.335 167.349 6
 -1 11 -5 4187.83 313.61 6
 1 11 6 402.854 168.868 6
 -1 11 -6 292.726 141.332 6
 -1 11 -7 1137.83 151.963 6
 1 11 7 888.713 166.783 6
 1 11 8 73.6954 112.349 6
 -1 11 -8 50.391 68.5975 6
 1 11 9 -38.1121 76.6188 6
 -1 12 7 126.11 78.0623 6
 -1 12 6 1771.19 172.516 6
 -1 12 5 196.08 129.983 6
 1 12 -4 1841.38 173.255 6
 -1 12 4 2263.98 218.926 6
 -1 12 3 181.76 150.869 6
 1 12 -3 -11.4401 111.53 6
 1 12 -2 3359.36 255.409 6
 1 12 -1 201.256 142.232 6
 -1 12 0 1930.19 223.1 6
 1 12 0 1551.37 207.142 6
 -1 12 -1 678.72 175.724 6
 1 12 1 486.642 164.81 6
 -1 12 -2 191.929 148.099 6
 1 12 2 258.309 155.249 6
 1 12 3 194.44 145.122 6
 -1 12 -3 276.966 139.503 6
 1 12 4 800.768 161.733 6
 -1 12 -4 432.055 133.01 6
 -1 12 -5 281.298 98.3363 6
 1 12 6 397.887 111.123 6
 -1 13 1 281.438 92.4805 6
 -1 13 0 525.668 99.2511 6
 -1 13 -1 112.208 82.8456 6
 2 0 -17 200.066 111.764 5
 -2 0 16 2831.76 271.273 3
 2 0 -16 2952.62 265.089 5
 -2 0 15 117.993 167.793 3
 -2 0 14 12537.6 653.332 3
 -2 0 13 166.199 174.056 3
 -2 0 13 -67.1793 113.125 7
 -2 0 12 29200.1 1154.66 3
 -2 0 12 26342 1093.16 7
 -2 0 11 74.8526 115.926 7
 -2 0 11 122.672 143.231 3
 -2 0 10 102108 3527.48 3
 -2 0 10 101668 3495.06 7
 2 0 -9 14.1854 85.0573 2
 -2 0 9 13.0777 116.057 3
 -2 0 9 -11.5657 90.7995 7
 2 0 -8 67074 2294.55 2
 -2 0 8 65295.7 2265.54 7
 -2 0 8 64293.1 2280.09 3
 2 0 -7 38.9596 79.0861 2
 2 0 -6 2037.77 159.034 2
 2 0 -5 25.3381 82.681 2
 2 0 -4 23658 839.001 2
 2 0 -3 28.5316 71.8504 2
 -2 0 3 -8.0813 66.0354 2
 -2 0 2 8563 327.022 2
 2 0 -2 8612.81 327.871 2
 -2 0 1 33.1832 54.7677 2
 2 0 -1 9.34959 41.0873 1
 2 0 0 28317 977.76 1
 2 0 2 1707.87 124.385 1
 2 0 3 92.4885 77.6148 1
 2 0 4 -23.2512 81.7632 1
 2 0 5 36.119 80.1422 1
 2 0 6 1528.56 164.847 7
 2 0 6 1337.38 150.519 1
 2 0 6 1260.92 162.519 3
 2 0 7 23.3526 92.9321 1
 2 0 7 -106.607 119.537 3
 2 0 7 67.9234 116.558 7
 2 0 8 9642.37 487.968 7
 2 0 8 9045.98 479.558 3
 2 0 8 9067.12 449.713 1
 2 0 9 124.504 148.152 7
 2 0 9 196.045 155.606 3
 -2 0 -9 19.9416 155.51 5
 2 0 10 2110.89 251.761 7
 -2 0 -10 1472.5 251.983 5
 -2 0 -11 -72.1657 199.079 5
 2 0 11 211.256 177.009 7
 2 0 12 107.337 175.434 7
 -2 0 -12 49.3572 164.671 5
 -2 0 -13 308.11 202.192 5
 2 0 13 -20.1013 146.472 7
 -2 0 -14 2434.39 273.996 5
 2 0 14 2236.61 233.678 7
 2 0 15 -142.124 112.855 7
 -2 0 -15 50.496 145.286 5
 -2 0 -16 1103.84 151.348 5
 2 -1 -17 2163.17 210.431 5
 -2 1 16 537.323 180.115 3
 2 1 -16 472.767 131.126 5
 2 -1 -16 691.298 186.217 5
 2 1 -15 3313.36 284.816 5
 -2 1 15 3452.63 331.086 3
 -2 -1 15 4029.31 307.658 3
 -2 1 15 3310.75 271.955 7
 -2 1 14 522.696 161.239 7
 -2 -1 14 713.313 188.836 3
 -2 1 14 439.817 218.975 3
 2 1 -14 579.105 169.339 5
 -2 -1 13 11641 620.255 3
 -2 1 13 13027.9 670.918 3
 -2 1 13 12387.4 622.913 7
 -2 1 12 574.43 192.535 3
 -2 -1 12 838.259 176.346 3
 -2 1 12 978.119 191.921 7
 -2 1 11 16771.1 761.816 3
 -2 1 11 16306.3 735.387 7
 -2 -1 11 15518.2 723.609 3
 -2 -1 10 11160.9 534.513 3
 -2 1 10 10572.1 542.59 3
 -2 1 10 10749.3 530.878 7
 -2 1 9 17248.2 714.845 7
 -2 -1 9 16813.8 703.267 3
 2 -1 -9 16540.8 711.528 2
 -2 1 9 16510 721.496 3
 2 -1 -8 19406.1 739.807 2
 2 1 -8 18298.5 743.919 2
 -2 -1 8 19088 729.4 3
 2 -1 -8 17014.7 639.603 1
 -2 1 8 18975.1 748.144 3
 -2 1 8 18189.6 736.191 7
 2 1 -7 154.258 87.9154 2
 -2 1 7 50.7284 99.5129 3
 2 -1 -7 235.188 56.252 1
 2 -1 -7 168.467 79.1054 2
 2 -1 -6 25256.8 858.543 1
 2 1 -6 23137.4 913.683 2
 2 -1 -6 25515 909.47 2
 2 -1 -5 613.86 66.8043 1
 2 1 -5 525.034 110.31 2
 2 -1 -5 823.64 97.5912 2
 2 -1 -4 22136.7 787.568 2
 -2 -1 4 22194.4 799.6 2
 2 -1 -3 35603.6 1172.81 2
 -2 -1 3 33086 1190.39 2
 -2 -1 2 33976.3 1151.61 1
 2 1 -2 35259.1 1149.29 1
 2 -1 -2 35023.9 1152.97 2
 -2 1 2 35281.9 1151.31 2
 -2 -1 1 40083 1295.87 1
 2 1 -1 38916.8 1293.83 1
 -2 1 1 39688.8 1277.66 2
 -2 -1 0 641.165 81.6641 1
 2 1 0 475.552 67.2461 1
 2 1 1 6049.05 263.408 1
 2 -1 2 7430.79 323.053 1
 2 1 3 11420.1 462.811 1
 2 -1 3 11049.6 464.188 1
 -2 -1 -3 11679 469.036 1
 2 -1 4 21665.7 830.162 1
 2 1 4 22937 843.03 1
 -2 -1 -4 22581.2 842.124 1
 2 1 5 22898.7 896.207 6
 2 1 5 22852.4 900.605 7
 2 1 5 24492 895.697 1
 2 -1 5 23733.7 889.767 1
 2 1 5 24482.2 901.815 3
 -2 -1 -5 23349.6 895.903 1
 -2 1 -6 33356.7 1272.22 5
 2 1 6 35946.5 1257.53 1
 2 -1 6 33315.9 1255.1 3
 2 1 6 34022.2 1268.79 7
 2 1 6 33989.9 1262.58 6
 2 -1 6 33955.4 1256.94 7
 2 -1 6 33974.2 1245.23 1
 2 -1 7 -26.2647 112.767 7
 2 1 7 134.436 136.895 6
 2 1 7 218.678 110.795 1
 2 -1 7 195.413 99.3008 1
 -2 1 -7 208.837 129.546 5
 2 1 7 127.983 119.949 7
 2 1 8 10739.8 556.278 7
 -2 1 -8 11033.5 564.154 5
 2 -1 8 11714.2 549.931 7
 2 1 9 1852.39 226.029 7
 -2 1 -9 1799.67 241.009 5
 2 -1 9 2178.52 227.802 7
 -2 -1 -10 274.322 183.304 5
 -2 1 -10 325.731 192.838 5
 2 -1 10 243.718 156.267 7
 2 1 10 41.5615 171.035 7
 -2 -1 -11 395.333 212.599 5
 2 1 11 756.939 214.654 7
 2 -1 11 217.34 152.686 7
 -2 1 -11 904.654 225.656 5
 2 -1 12 58.6692 141.33 7
 2 1 12 22.6672 172.95 7
 -2 -1 -12 -50.6875 209.738 5
 -2 1 -12 212.822 208.716 5
 -2 -1 -13 2188.26 303.022 5
 2 1 13 2869.93 292.79 7
 -2 1 -13 2829.12 297.997 5
 2 -1 13 2337.13 239.28 7
 -2 -1 -14 1273.04 250.031 5
 -2 1 -14 1156.42 207.307 5
 2 1 14 1205.3 206.755 7
 -2 1 -15 1331.38 185.848 5
 -2 -1 -15 1078 205.791 5
 2 1 15 1106.22 169.695 7
 -2 1 -16 255.575 97.7325 5
 -2 -1 -16 110.509 110.907 5
 2 -2 -18 404.264 91.9107 5
 2 -2 -17 172.394 128.305 5
 -2 2 16 1153.7 220.188 3
 -2 2 16 1009.97 164.851 7
 -2 2 15 219.113 148.509 7
 -2 2 15 356.382 184.22 3
 -2 2 14 102.964 158.266 7
 -2 -2 14 -151.748 135.101 3
 -2 2 14 202.884 208.57 3
 -2 -2 13 242.229 136.853 3
 2 2 -13 193.611 130.361 5
 -2 2 13 21.1528 156.637 7
 -2 2 13 22.5953 184.692 3
 -2 -2 12 662.872 165.589 3
 -2 2 12 514.087 212.51 3
 -2 2 12 591.256 179.036 7
 -2 2 11 15312.2 715.589 7
 -2 2 11 15046.1 726.278 3
 -2 -2 11 14759.4 672.688 3
 -2 -2 10 7530.44 395.176 3
 -2 2 10 7073.15 427.126 7
 2 -2 -9 7712.95 401.409 2
 -2 -2 9 7864.7 394.127 3
 -2 2 9 7814.03 427.025 7
 2 2 -8 5806.78 342.014 2
 -2 -2 8 6273.22 321.577 3
 -2 2 8 6697.37 363.054 7
 2 -2 -8 6335.37 291.175 1
 2 -2 -8 6602.83 336.056 2
 2 -2 -7 3679.5 221.23 2
 2 -2 -7 3903.22 201.943 1
 2 2 -7 3827.28 242.833 2
 -2 2 7 3110.35 236.083 7
 2 2 -6 10408.2 445.013 2
 2 -2 -6 9557.16 408.274 2
 2 -2 -6 9669.12 393.748 1
 2 -2 -5 1872.55 130.086 2
 2 2 -5 1664.89 158.91 2
 2 -2 -4 1321.68 101.072 2
 -2 -2 4 1129.83 58.394 1
 2 2 -4 1584.42 136.134 2
 -2 -2 4 1444.65 129.897 2
 -2 -2 3 131051 4656.28 2
 2 -2 -3 144664 4617.34 2
 2 2 -3 143691 4662.96 2
 -2 -2 3 139659 4616.37 1
 -2 -2 2 682.512 107.686 2
 -2 -2 2 679.279 70.7949 1
 2 -2 -2 661.557 45.8202 2
 -2 -2 1 13039 464.508 1
 -2 -2 1 11858.1 479.098 2
 -2 -2 0 3422.98 183.669 1
 -2 -2 -1 7144.82 313.211 1
 2 2 1 7208.23 310.062 1
 2 2 3 12363 508.939 1
 -2 -2 -3 12635 511.628 1
 2 -2 4 14541.8 605.74 1
 2 2 4 15743.6 612.91 1
 -2 -2 -4 14977 609.204 1
 -2 2 -5 60375.1 2097.96 5
 2 2 5 58933.6 2093.8 7
 2 2 5 60654.3 2091.5 6
 2 2 5 59695.1 2083.48 3
 2 -2 5 59072.6 2076.78 1
 -2 -2 -5 60185.5 2092.25 1
 2 -2 6 1150.77 145.155 7
 -2 -2 -6 1318.29 173.434 1
 -2 2 -6 1184.04 162.115 5
 2 2 6 1435.55 173.76 3
 2 -2 6 1616.21 163.311 1
 2 2 6 1388.09 179.87 6
 -2 2 -7 32382 1226.94 2
 2 -2 7 32823.3 1222.38 1
 -2 2 -7 32553.7 1259.58 5
 2 2 7 32100.3 1251.56 6
 -2 -2 -7 32666.4 1250.9 1
 2 2 7 33365.5 1253.44 3
 2 -2 7 33347.9 1234.84 7
 2 2 8 373.114 167.551 6
 -2 2 -8 391.041 153.773 5
 2 -2 8 392.993 133.835 7
 2 2 8 179.123 144.99 3
 2 2 8 505.488 164.887 7
 2 2 9 17048.7 775.481 7
 -2 2 -9 16985.3 766.278 5
 2 -2 9 15164.7 710.854 7
 2 2 9 15963.9 758.221 3
 2 2 10 208.17 195.727 3
 -2 2 -10 251.869 167.353 5
 2 2 10 436.719 216.885 7
 2 -2 10 346.045 146.187 7
 2 2 11 6421.17 463.438 7
 2 -2 11 5899.03 384.533 7
 -2 2 -11 6618.05 442.513 5
 -2 2 -12 397.754 198.517 5
 2 2 12 258.676 210.1 7
 2 2 13 2465.16 293.948 7
 -2 2 -13 2668.1 279.399 5
 -2 2 -14 242.228 142.331 5
 -2 -2 -14 -85.3702 175.549 5
 2 2 14 134.625 159.196 7
 2 2 15 2162.74 220.008 7
 -2 2 -15 2000.2 193.657 5
 -2 -2 -15 2216.45 241.793 5
 -2 -2 -16 1158.18 156.852 5
 2 2 16 735.873 110.913 7
 2 -3 -17 -41.6091 122.414 5
 -2 3 17 28.249 85.3616 7
 -2 3 16 149.982 130.215 7
 -2 3 16 34.51 162.056 3
 -2 3 15 133.566 159.922 7
 -2 3 14 933.188 217.462 7
 -2 3 13 699.308 194.89 7
 -2 3 12 419.722 201.762 7
 -2 3 11 20.4381 172.276 3
 -2 3 11 -20.6931 163.58 7
 -2 3 10 5546.35 381.916 3
 -2 3 10 5686.1 389.879 7
 -2 3 9 50.4848 129.333 7
 -2 3 9 -63.9018 141 3
 2 -3 -8 5055.9 283.837 1
 2 -3 -8 5618.89 297.839 2
 -2 3 8 5056.08 329.883 7
 -2 3 8 4749.01 319.428 3
 2 3 -7 100.339 92.8452 2
 -2 3 7 12.0407 106.862 3
 2 -3 -7 -45.8168 86.4703 1
 -2 3 7 117.146 115.519 7
 2 -3 -7 63.1638 66.8021 2
 2 -3 -6 16595 635.998 1
 -2 3 6 16144.4 665.706 4
 -2 3 6 15459.8 655.537 3
 2 3 -6 16276.7 665.014 2
 2 -3 -6 16184.4 618.094 2
 -2 -3 5 954.184 63.0576 1
 2 3 -5 1024.05 131.645 2
 -2 -3 5 934.544 122.612 2
 2 -3 -5 1033.33 96.7113 2
 -2 -3 4 44611.9 1554.81 2
 2 3 -4 44449 1552.25 2
 -2 -3 4 45378.1 1491.6 1
 2 -3 -4 42988.3 1493.37 2
 -2 -3 3 3655.86 176.088 1
 2 -3 -3 3447.1 148.817 2
 -2 -3 3 4210.41 216.412 2
 2 3 -3 4403.98 223.601 2
 -2 -3 2 4250.57 201.622 1
 -2 -3 2 4185.86 224.071 2
 -2 -3 1 2668.97 165.674 2
 -2 -3 1 2615.87 152.384 1
 -2 -3 0 17319.7 648.847 1
 -2 -3 0 17173.6 649.97 2
 -2 -3 -1 26456 882.178 1
 -2 3 -1 23167.2 795.479 2
 -2 3 -2 19643 685.891 2
 -2 3 -3 10800.7 404.099 2
 -2 -3 -3 9409.41 448.706 1
 -2 3 -4 96871.4 3268.55 2
 -2 -3 -4 97392.6 3326.72 1
 2 3 4 98769 3318.38 7
 2 -3 5 2884.73 220.512 1
 2 3 5 2928.83 227.519 7
 2 3 5 2983.72 215.198 3
 -2 -3 -5 3072.66 234.531 1
 -2 3 -5 3271.29 228.246 5
 -2 3 -5 2910.6 186.831 2
 2 -3 6 41345.2 1508.62 1
 -2 -3 -6 41354.1 1532.12 1
 -2 3 -6 42990.5 1526.67 5
 2 3 6 43641.5 1535.43 6
 -2 3 -6 40936 1486.47 2
 2 -3 6 38486.5 1485.13 7
 2 3 6 42225.3 1518.41 3
 2 3 6 42076.2 1538.7 7
 2 3 7 672.558 156.818 3
 -2 3 -7 864.824 162.822 5
 2 -3 7 498.244 125.343 7
 2 3 7 916.538 174.926 6
 2 3 7 588.903 176.444 7
 -2 3 -7 570.706 100.429 2
 -2 3 -8 22174.6 934.33 5
 2 3 8 23549.9 957.513 6
 2 3 8 21315.5 932.735 3
 2 3 9 95.6177 174.335 3
 2 3 9 154.288 191.422 6
 -2 3 -9 204.574 152.053 5
 2 3 10 16417.4 798.122 7
 -2 3 -10 15761 747.584 5
 2 3 10 15507.6 770.402 3
 2 3 11 312.039 219.02 7
 -2 3 -11 370.29 166.318 5
 -2 3 -12 2404.39 258.712 5
 2 3 12 3008.2 343.534 7
 -2 -3 -12 2294.43 324.447 5
 -2 -3 -13 2375.41 307.819 5
 2 3 13 2059.7 289.354 7
 -2 3 -13 2027.15 231.796 5
 -2 3 -14 5873.82 349.923 5
 2 3 14 6226.29 415.047 7
 -2 -3 -14 6519.51 440.942 5
 2 3 15 100.602 127.582 7
 2 3 16 2530.08 179.758 7
 -2 4 17 227.196 96.2541 7
 2 -4 -17 332.549 129.213 5
 -2 4 16 1057.46 189.124 3
 -2 4 16 729.869 153.568 7
 -2 4 15 830.454 199.991 7
 -2 4 15 741.122 208.873 3
 -2 4 14 788.844 212.379 7
 -2 4 14 857.658 232.041 3
 -2 4 13 451.055 208.309 3
 -2 4 13 606.768 231.164 7
 -2 4 12 117.044 196.124 7
 -2 4 12 -66.9788 180.082 3
 -2 4 11 211.435 168.445 3
 -2 4 11 246.407 186.676 7
 -2 4 10 10953.2 575.162 3
 -2 4 10 10491.3 587.864 7
 -2 4 9 2755.8 226.552 6
 -2 4 9 2133.12 239.54 3
 -2 4 9 2694.95 276.95 7
 -2 4 8 9305.26 468.408 3
 -2 4 8 8183.21 423.831 6
 -2 4 7 16248.5 683.546 6
 2 -4 -7 16084.5 649.594 2
 2 4 -7 17020.4 712.226 2
 -2 4 7 16774.3 706.522 3
 2 -4 -7 17344.5 694.474 1
 2 -4 -6 21769.6 833.507 1
 2 -4 -6 20333.1 775.322 2
 -2 4 6 21975.8 850.219 4
 2 4 -6 22305.1 849.137 2
 -2 4 6 19491.5 830.104 3
 -2 4 6 21899.4 831.018 6
 -2 -4 5 21870.4 842.328 2
 -2 4 5 22255.7 844.878 3
 -2 4 5 21771.5 852.826 4
 2 4 -5 22307.5 850.416 2
 2 -4 -5 21562.8 776.839 2
 -2 -4 5 21661.5 773.635 1
 2 -4 -4 4469.97 188.844 2
 -2 4 4 4222.53 256.836 4
 -2 -4 4 4453.16 216.727 1
 -2 -4 4 4939.84 255.578 2
 2 4 -4 4616.79 260.961 2
 -2 -4 3 17507.5 427.747 1
 -2 -4 3 18390.9 472.978 2
 -2 -4 2 44222.3 1536.47 2
 -2 -4 2 43422.6 1517.17 1
 -2 -4 1 40015.8 1434.91 1
 -2 -4 1 42158.1 1445.86 2
 -2 -4 0 50839.8 1766.39 1
 -2 -4 0 50480.7 1758.86 2
 -2 -4 -1 46556.8 1642.25 1
 -2 4 -2 11170.7 412.612 2
 2 4 2 11401.8 502.565 6
 -2 4 -3 27040.1 953.059 2
 2 4 3 27894.7 1039.18 6
 -2 4 -4 3714.96 242.429 5
 2 4 4 4708.08 253.58 3
 -2 4 -4 3748.03 203.366 2
 2 4 4 4255.84 267.138 7
 -2 -4 -4 4511.86 285.967 1
 -2 4 -5 639.714 87.9681 2
 2 4 5 692.638 138.377 3
 -2 4 -5 486.795 115.602 5
 -2 -4 -5 816.085 160.379 1
 2 4 5 791.999 153.087 7
 -2 4 -6 11005.5 516.916 5
 2 -4 6 10955.2 527.873 1
 2 4 6 11089.8 549.512 6
 2 4 6 11518.4 525.349 3
 2 4 6 10520.5 536.201 7
 -2 4 -7 6726.73 376.758 5
 2 4 7 6259.61 405.766 7
 2 4 7 6541.01 382.444 3
 2 4 7 5830.72 394.794 6
 2 4 8 400.588 164.915 3
 -2 4 -8 623.873 151.006 5
 2 4 8 339.941 176.06 7
 2 4 8 243.71 182.44 6
 -2 4 -9 9945.08 525.726 5
 2 4 9 10096.1 584.451 7
 2 4 9 10128.6 554.581 3
 2 4 9 9998.71 571.128 6
 2 4 10 1177.4 221.223 3
 -2 4 -10 809.819 174.778 5
 -2 4 -11 7158.54 425.046 5
 -2 -4 -12 1082.13 248.026 5
 -2 4 -12 1316.19 185.802 5
 -2 -4 -13 3068.52 325.963 5
 2 4 13 3488.52 332.475 7
 -2 -4 -14 560.148 175.083 5
 2 4 14 782.416 185.943 7
 -2 -4 -15 2957.96 238.458 5
 2 4 15 2361.06 220.448 7
 -2 -4 -16 -16.4573 69.7791 5
 -2 5 16 -51.5256 131.695 3
 -2 5 16 301.244 128.873 7
 -2 5 15 3367.19 288.684 3
 -2 5 15 2756.22 276.297 7
 -2 5 14 63.1759 182.805 7
 -2 5 14 136.064 168.739 3
 -2 5 13 1892.29 274.525 3
 -2 5 13 2086.3 302.59 7
 -2 5 12 1104.08 279.599 7
 -2 5 12 1068.21 230.908 3
 -2 5 11 679.53 203.49 3
 -2 5 10 371.487 147.173 6
 -2 5 10 298.298 182.487 3
 -2 5 9 26735.7 1081.79 6
 -2 5 9 27986.2 1120.99 3
 -2 5 8 3680.42 279.917 6
 -2 5 8 3475.94 284.076 3
 -2 5 8 3645.21 315.531 7
 -2 5 7 26764.2 1067.32 6
 -2 5 7 27325.2 1104.26 7
 -2 5 7 27774.6 1074.54 3
 2 -5 -6 2180.9 210.703 1
 2 5 -6 2092.23 192.277 2
 -2 5 6 2629.99 212.26 3
 -2 5 6 2330.73 220.264 6
 -2 5 5 1803.03 175.926 3
 -2 5 5 1685.13 185.249 4
 -2 5 5 1682.19 195.826 6
 2 5 -5 1980.82 178.708 6
 2 5 -4 7431.04 371.705 6
 -2 -5 4 7985.96 376.7 2
 -2 5 4 7445.86 383.343 4
 -2 5 4 7888.11 406.184 6
 -2 -5 4 7754.07 350.14 1
 -2 5 4 7602.27 368.425 3
 -2 -5 3 2346.4 173.507 2
 -2 5 3 2413.91 195.398 4
 2 5 -3 2320.42 187.724 6
 -2 -5 3 2658.68 177.092 1
 -2 5 3 2213.36 210.349 6
 -2 -5 2 12945.3 529.72 2
 -2 -5 2 12463.6 523.791 1
 2 5 -2 12587.2 542.632 6
 -2 5 2 12349.9 565.387 6
 -2 -5 1 19063.8 735.233 1
 -2 -5 1 18975.9 727.998 2
 2 5 -1 17742.6 736.284 6
 -2 5 1 18500.2 765.801 6
 -2 -5 0 344.858 81.0131 2
 -2 -5 0 267.875 101.054 1
 2 5 0 151.711 113.346 6
 -2 -5 -1 31329.1 1177.85 1
 -2 -5 -1 31519.6 1150.84 2
 2 5 1 30920.1 1171.54 6
 2 5 2 172.312 136.664 6
 -2 -5 -2 -12.9746 106.713 1
 2 5 3 -33.1205 91.3765 7
 2 5 3 -80.0785 145.069 6
 2 5 4 2047.59 192.257 7
 2 5 5 464.648 119.206 3
 2 5 5 475.498 149.491 7
 2 5 6 1499.54 226.416 6
 2 5 6 857.319 157.34 3
 2 5 6 1205.65 192.578 7
 2 5 7 19.1474 159.44 7
 2 5 7 -18.9809 177.362 6
 2 5 7 15.6483 120.265 3
 2 5 8 1896.04 278.636 6
 2 5 8 1928 264.722 7
 2 5 8 1969.51 225.475 3
 2 5 9 749.847 185.754 3
 2 5 9 410.373 232.891 6
 2 5 9 433.641 201.145 7
 2 5 10 2591.46 332.027 7
 2 5 10 2941.19 327.021 6
 2 5 11 683.75 235.513 6
 -2 -5 -11 604.217 205.984 5
 2 5 11 450.28 235.901 7
 -2 -5 -12 4786.51 383.023 5
 -2 -5 -13 1619.41 231.247 5
 -2 -5 -14 208.307 134.35 5
 2 5 15 261.029 107.869 7
 -2 -5 -15 324.332 102.744 5
 2 -6 -16 3097.59 224.413 5
 -2 6 16 3093.07 217.23 7
 -2 6 15 130.686 126.972 3
 -2 6 15 287.676 153.587 7
 -2 6 14 8455.68 467.486 3
 -2 6 14 8456.51 498.129 7
 -2 6 13 37.3029 154.353 3
 -2 6 12 7234.81 459.719 3
 -2 6 11 -15.9496 129.508 6
 -2 6 11 182.805 172.251 3
 -2 6 11 119.844 208.043 7
 -2 6 10 966.811 189.19 6
 -2 6 10 531.805 184.709 3
 -2 6 10 704.882 234.355 7
 -2 6 9 3555.17 300.438 3
 -2 6 9 3156.49 324.55 7
 -2 6 9 2666.58 270.615 6
 -2 6 8 17022.8 758.057 3
 -2 6 8 17481.9 813.183 7
 -2 6 8 16323.8 761.174 6
 -2 6 7 3089.54 282.225 6
 -2 6 7 3072.73 256.341 3
 -2 6 7 3009.92 283.102 7
 -2 6 6 23509.9 971.121 7
 2 6 -6 22215.8 910.638 6
 -2 6 6 22109.1 949.09 6
 -2 6 6 23518.9 916.719 3
 -2 6 5 438.854 161.023 6
 -2 6 5 342.802 147.62 4
 -2 6 5 281.58 110.986 3
 2 6 -5 26.1771 120.752 6
 -2 6 4 27742.5 1050.71 4
 2 6 -4 27452.5 1056.42 6
 -2 6 4 28882 1094.37 6
 -2 -6 4 25468.1 1030.67 2
 -2 6 3 5473.49 305.556 4
 -2 -6 3 5034.06 286.602 1
 -2 6 3 4886.05 338.07 6
 2 6 -3 4701.84 313.386 6
 -2 -6 3 4830.59 279.044 2
 -2 -6 2 648.879 97.9425 2
 -2 6 2 959.587 136.668 4
 -2 -6 2 773.315 116.042 1
 2 6 -2 672.815 146.683 6
 -2 6 2 763.896 169.211 6
 -2 -6 1 1542.83 163.377 1
 -2 -6 1 1750.59 149.605 2
 2 6 -1 1380.59 184.17 6
 -2 6 1 1622.2 218.067 6
 -2 6 0 573.859 166.251 6
 -2 -6 0 423.067 94.7734 2
 -2 -6 0 596.401 135.559 1
 2 6 0 449.741 147.905 6
 -2 -6 -1 83.5146 77.3177 2
 2 6 1 85.6552 145.916 6
 -2 -6 -2 2520.35 193.628 2
 2 6 2 2664.76 254.614 6
 2 6 3 502.311 121.665 7
 2 6 3 545.833 174.034 6
 2 6 4 42.6364 115.425 7
 2 6 4 206.948 169.642 6
 2 6 5 470.961 149.535 7
 2 6 6 18.2919 133.261 7
 2 6 7 3597.88 325.23 7
 2 6 7 3710.39 349.971 6
 2 6 8 283.591 188.309 7
 2 6 8 -43.5999 205.738 6
 2 6 9 355.625 214.895 6
 2 6 9 228.071 182.975 7
 -2 -6 -10 511.465 188.637 5
 2 6 10 371.886 217.52 6
 2 6 10 413.124 211.771 7
 2 6 11 -182.06 189.029 6
 2 6 11 21.9652 203.231 7
 -2 -6 -11 20.3177 146.827 5
 2 6 12 1956.19 256.896 7
 -2 -6 -12 1261.78 208.275 5
 -2 -6 -13 -73.0325 125.328 5
 2 6 13 82.6922 159.756 7
 -2 -6 -14 2321.48 194.26 5
 2 6 14 2852.88 225.397 7
 -2 7 14 58.6045 114.782 3
 -2 7 13 2913.73 298.111 7
 -2 7 13 2427.43 236.371 3
 -2 7 12 497.001 162.221 3
 -2 7 12 428.261 215.761 7
 -2 7 11 2350.29 313.633 7
 -2 7 11 2020.19 219.963 6
 -2 7 11 2110.16 234.16 3
 -2 7 10 2765.37 317.182 7
 -2 7 10 2260.94 251.068 6
 -2 7 10 2655.11 261.15 3
 -2 7 9 226.425 142.629 3
 -2 7 9 275.448 198.311 7
 -2 7 9 373.712 162.448 6
 -2 7 8 -38.4264 158.002 6
 -2 7 8 16.3856 119.374 3
 -2 7 8 109.942 181.965 7
 -2 7 7 7501.96 473.293 7
 2 7 -7 7330.24 422.787 6
 -2 7 7 7852.19 422.313 3
 -2 7 7 7770.25 484.771 6
 2 7 -6 233.242 144.229 6
 -2 7 6 343.32 161.096 7
 -2 7 6 417.974 193.628 6
 -2 7 5 11968.2 586.113 7
 -2 7 5 10810.3 593.698 6
 2 7 -5 11470.3 567.957 6
 -2 7 4 7948.7 490.917 6
 2 7 -4 9259 479.073 6
 -2 7 4 8541.35 465.237 7
 -2 7 3 3972.14 333.72 6
 2 7 -3 3985.75 305.183 6
 -2 7 3 4107.74 272.57 4
 2 7 -2 15314.2 709.61 6
 -2 7 2 16104.5 744.751 6
 2 7 -1 1941.95 235.752 6
 -2 7 1 1715.79 243.353 6
 2 7 0 8959.62 495.988 6
 -2 7 0 8818.15 506.414 6
 2 7 1 501.241 185.147 6
 2 7 2 7587.6 462.684 6
 2 7 3 2425.9 286.164 6
 2 7 4 9198.45 479.036 7
 2 7 4 10144.3 564.792 6
 2 7 5 187.26 141.886 7
 2 7 6 3011.17 279.013 7
 2 7 7 1565.81 284.106 6
 2 7 7 1642.74 232.737 7
 2 7 8 5343.33 403.7 7
 2 7 8 5776.03 447.026 6
 -2 -7 -9 -54.3355 136.161 5
 2 7 9 342.562 193.091 7
 2 7 9 218.549 225.181 6
 -2 -7 -10 4095.18 317.842 5
 2 7 10 4671.17 382.919 6
 -2 7 -11 292.654 156.905 6
 -2 -7 -11 448.502 138.644 5
 2 7 11 602.486 201.343 7
 2 7 11 359.035 177.847 6
 -2 -7 -12 1102.57 150.366 5
 -2 7 -12 847.306 149.405 6
 2 7 12 1187.99 193.109 7
 2 7 13 340.033 129.461 7
 -2 -7 -13 198.247 83.6226 5
 2 7 14 -16.484 68.6327 7
 2 -8 -14 140.863 86.6671 5
 -2 8 14 271.565 113.888 7
 -2 8 13 14.8775 129.127 7
 -2 8 12 142.06 174.71 7
 -2 8 11 198.689 182.91 7
 -2 8 11 -68.053 122.74 6
 -2 8 10 824.802 182.456 6
 -2 8 10 762.489 215.351 7
 -2 8 9 2514.97 286.54 7
 -2 8 9 2423.42 268.702 6
 -2 8 8 43.0718 172.611 7
 -2 8 8 220.189 176.723 6
 -2 8 7 520.766 193.427 7
 2 8 -7 517.091 158.369 6
 -2 8 7 458.008 215.117 6
 -2 8 6 21.166 183.732 6
 -2 8 6 -59.2241 150.649 7
 2 8 -6 358.722 160.428 6
 -2 8 5 13585.9 651.776 7
 2 8 -5 13080.4 646.812 6
 -2 8 5 12861.7 692.66 6
 -2 8 4 1745.57 213.119 7
 -2 8 4 1472.69 270.328 6
 2 8 -4 1656.97 230.533 6
 -2 8 3 14465 670.968 7
 -2 8 3 14475 756.056 6
 2 8 -3 16405.5 736.386 6
 2 8 -2 877.01 207.196 6
 -2 8 2 984.899 241.242 6
 2 8 -1 15758.9 763.627 6
 -2 8 1 16612.8 803.918 6
 2 8 0 4190.12 358.455 6
 -2 8 0 4994.95 405.432 6
 2 8 1 10595.8 584.592 6
 2 8 2 848.594 245.299 6
 -2 8 -3 14221 747.232 6
 2 8 3 13579.6 725.537 6
 2 8 4 220.875 230.316 6
 -2 8 -4 -23.5433 228.475 6
 2 8 5 6988.48 409.08 7
 -2 8 -5 7702.82 525.49 6
 2 8 6 176.602 130.857 7
 -2 8 -6 211.82 207.814 6
 -2 8 -7 2902.23 354.552 6
 2 8 7 3278.57 290.777 7
 2 8 7 3925.24 391.117 6
 -2 8 -8 494.042 216.394 6
 2 8 8 411.848 158.493 7
 2 8 8 515.686 254.245 6
 2 8 9 5179.55 365.457 7
 2 8 9 6014.92 421.655 6
 -2 8 -9 4953.83 381.543 6
 2 8 10 16.5141 136.676 7
 2 8 10 -53.1354 178.023 6
 -2 8 -10 226.126 160.269 6
 2 8 11 5096.8 317.079 7
 -2 8 -11 4123.91 280.396 6
 2 8 12 11.1035 96.917 7
 -2 9 13 84.3323 84.9881 7
 -2 9 12 376.555 127.278 7
 -2 9 11 438.211 148.646 7
 -2 9 10 271.234 153.075 7
 -2 9 10 218.837 134.749 6
 -2 9 9 1112.91 200.106 6
 -2 9 9 1308.4 209.634 7
 -2 9 8 169.757 175.503 6
 -2 9 8 224.736 166.326 7
 -2 9 7 522.259 172.115 7
 2 9 -7 516.083 151.067 6
 2 9 -6 101.477 147.627 6
 -2 9 6 36.2116 134.018 7
 -2 9 6 -86.4861 194.984 6
 -2 9 5 378.111 149.661 7
 -2 9 5 625.125 223.76 6
 2 9 -5 235.941 160.644 6
 -2 9 4 228.846 236.829 6
 2 9 -4 209.903 171.318 6
 -2 9 3 231.667 230.933 6
 2 9 -3 158.43 175.85 6
 2 9 -2 469.252 187.829 6
 -2 9 2 793.581 255.309 6
 -2 9 1 -47.2073 245.137 6
 2 9 -1 20.9073 190.515 6
 2 9 0 8951.44 538.359 6
 2 9 1 108.837 215.062 6
 -2 9 -2 18812.1 926.387 6
 2 9 2 19689.6 910.238 6
 2 9 3 224.868 235.52 6
 -2 9 -3 264.074 226.654 6
 2 9 4 15824.8 776.358 6
 -2 9 -4 13505.4 756.592 6
 -2 9 -5 2246.12 320.416 6
 -2 9 -6 4952.02 408.698 6
 -2 9 -7 -20.4228 185.143 6
 2 9 7 122.977 208.602 6
 2 9 8 3729.88 276.612 7
 -2 9 -8 4674.07 351.488 6
 2 9 9 -198.073 115.12 7
 2 9 9 297.606 166.88 6
 -2 9 -9 105.525 155.948 6
 -2 9 -10 4493.16 271.481 6
 2 9 10 4593.5 303.595 6
 -2 10 11 149.048 83.3638 7
 -2 10 10 349.302 105.697 7
 -2 10 10 100.35 93.4769 6
 -2 10 9 -36.6308 102.927 7
 -2 10 9 151.188 131.885 6
 -2 10 8 908.863 151.911 7
 -2 10 8 803.487 185.249 6
 -2 10 7 621.339 191.127 6
 -2 10 7 203.315 121.39 7
 2 10 -6 1400.98 191.304 6
 -2 10 6 1447.34 254.321 6
 -2 10 5 2065.76 288.447 6
 2 10 -5 2212.24 237.051 6
 2 10 -4 6356.04 410.008 6
 -2 10 4 6492.31 464.635 6
 2 10 -3 3570.19 317.743 6
 -2 10 3 3588.89 375.426 6
 2 10 -2 3094.01 318.217 6
 -2 10 2 2926.02 344.568 6
 -2 10 1 4064.03 395.561 6
 2 10 -1 3679.31 342.399 6
 2 10 0 20.9298 195.574 6
 2 10 1 4136.04 374.5 6
 2 10 2 383.464 220.844 6
 -2 10 -2 527.215 259.283 6
 -2 10 -3 9495.92 564.042 6
 2 10 3 7710.19 523.516 6
 2 10 4 1482.43 272.399 6
 -2 10 -4 1026.09 252.629 6
 2 10 5 1418.72 272.108 6
 -2 10 -5 1283.32 247.921 6
 -2 10 -6 328.236 195.596 6
 -2 10 -7 317.741 174.848 6
 -2 10 -8 155.902 129.465 6
 2 10 8 -115.491 156.91 6
 2 10 9 709.581 160.317 6
 -2 10 -9 607.14 120.251 6
 -2 11 8 71.4526 108.119 6
 -2 11 7 1325.98 186.877 6
 -2 11 6 165.246 156.726 6
 -2 11 5 1809.01 241.913 6
 2 11 -5 1001.67 156.09 6
 -2 11 4 90.2211 186.675 6
 2 11 -4 83.2721 136.528 6
 2 11 -3 2443.04 244.213 6
 -2 11 3 2221.09 290.242 6
 -2 11 2 58.9109 191.527 6
 2 11 -2 313.124 173.303 6
 2 11 -1 482.975 181.37 6
 -2 11 1 598.703 234.186 6
 2 11 0 35.4187 174.179 6
 2 11 1 589.565 198.597 6
 2 11 2 1850.75 255.744 6
 -2 11 -2 1744.04 263.192 6
 2 11 3 684.145 201.434 6
 -2 11 -3 700.68 207.511 6
 2 11 4 292.183 185.282 6
 -2 11 -4 132.931 169.942 6
 2 11 5 269.426 156.783 6
 -2 11 -5 89.1248 155.591 6
 -2 11 -6 -12.6683 128.931 6
 -2 11 -7 657.685 129.538 6
 2 11 8 -8.991 91.5055 6
 -2 12 6 44.3097 93.4967 6
 -2 12 5 182.814 124.81 6
 -2 12 4 659.68 158.084 6
 -2 12 3 145.932 137.319 6
 2 12 -3 151.645 100.101 6
 2 12 -2 1124.18 154.726 6
 -2 12 2 1449.05 201.714 6
 2 12 -1 256.838 129.734 6
 -2 12 1 56.8967 152.443 6
 2 12 0 485.392 145.949 6
 2 12 1 378.73 143.555 6
 -2 12 -1 413.764 160.407 6
 2 12 2 203.102 131.775 6
 -2 12 -2 26.0769 133.298 6
 2 12 3 1289.39 169.447 6
 -2 12 -3 1046.87 166.897 6
 2 12 4 102.93 113.902 6
 -2 12 -4 31.0496 108.36 6
 2 12 5 89.4673 97.2771 6
 -2 12 -5 75.0023 90.6157 6
 -2 13 1 303.808 83.9082 6
 -3 0 16 1337.41 207.262 3
 3 0 -16 801.218 169.659 5
 -3 0 15 -19.4035 160.573 3
 -3 0 14 7015.57 457.77 3
 -3 0 13 -102.503 166.472 3
 -3 0 12 20753.3 898.928 3
 -3 0 12 19578.6 838.169 7
 -3 0 11 -42.9881 109.327 7
 -3 0 11 104.145 136.269 3
 -3 0 10 21316.4 873.976 7
 -3 0 10 22750.8 912.935 3
 -3 0 9 26.5862 115.375 3
 -3 0 9 -11.452 85.4244 7
 -3 0 8 -39.9393 82.6284 7
 -3 0 8 34.5876 97.1813 3
 3 0 -8 23.9314 75.8983 2
 3 0 -7 80.3685 81.6119 2
 -3 0 7 99.1085 99.2269 3
 3 0 -6 32499.9 1170.46 2
 3 0 -5 15.643 19.0765 1
 3 0 -5 7.10005 80.1875 2
 -3 0 4 7388.33 312.197 2
 3 0 -4 6750.41 268.388 1
 3 0 -4 7499.42 310.776 2
 -3 0 3 -10.2975 75.9208 2
 3 0 -3 -47.169 59.1069 1
 3 0 -3 113.91 78.278 2
 -3 0 2 6129.47 263.017 2
 3 0 -2 6011.63 259.306 1
 3 0 -1 10.4703 67.989 1
 -3 0 1 42.1836 68.846 2
 3 0 0 48695.3 1670.06 1
 3 0 1 41.4325 79.8102 1
 3 0 3 9.06759 96.3885 1
 3 0 4 14180.9 595.463 7
 3 0 4 14120.1 590.67 1
 -3 0 -4 13957.1 598.572 5
 3 0 5 83.891 99.18 1
 3 0 5 -124.427 121.292 7
 3 0 6 9464.28 482.246 7
 3 0 6 9814.36 474.071 1
 3 0 7 16.2472 136.124 7
 -3 0 -8 9620.05 548.83 5
 3 0 8 10290.6 542.37 7
 -3 0 -9 -66.3706 166.292 5
 3 0 9 81.6784 167.921 7
 -3 0 -10 478.41 211.704 5
 3 0 10 482.94 196.491 7
 3 0 11 157.784 175.736 7
 -3 0 -11 -74.5191 201.676 5
 -3 0 -12 4302.4 390.422 5
 3 0 12 5511.44 396.788 7
 -3 0 -13 88.5426 189.927 5
 3 0 13 -76.1007 156.455 7
 3 0 14 3788.08 283.153 7
 -3 0 -14 4556.45 346.191 5
 -3 0 -15 110.175 124.897 5
 -3 0 -16 786.03 105.411 5
 -3 1 17 1204.97 183.922 3
 3 -1 -17 1341.46 178.181 5
 -3 -1 16 938.985 171.288 3
 -3 1 16 1162.81 214.576 3
 3 1 -15 1021.17 174.756 5
 -3 1 15 1133.68 237.552 3
 -3 -1 15 1491.78 209.174 3
 -3 -1 14 300.367 163.039 3
 -3 1 14 43.813 189.139 3
 -3 1 14 160.55 137.222 7
 -3 -1 13 358.504 168.762 3
 -3 1 13 478.676 156.557 7
 -3 1 13 195.409 182.285 3
 -3 1 12 12051.5 648.276 3
 -3 1 12 12987 625.951 7
 -3 -1 12 12912.2 631.337 3
 -3 1 11 12978.3 613.468 7
 -3 -1 11 12506.9 610.836 3
 -3 1 11 13014.5 640.425 3
 -3 1 10 21100.4 897.534 3
 -3 -1 10 21353.7 877.979 3
 -3 1 10 21805.1 887.937 7
 -3 1 9 13553.9 594.013 7
 -3 -1 9 13380.4 587.265 3
 3 -1 -9 12740.7 583.693 2
 -3 1 9 13264.7 608.333 3
 -3 -1 8 19236.6 771.457 3
 3 1 -8 20678 806.069 2
 3 -1 -8 19470.6 777.227 2
 -3 1 8 19527.3 784.355 7
 -3 1 8 19165.4 795.872 3
 -3 1 7 11684.3 498.691 4
 3 1 -7 11754.7 502.291 2
 3 -1 -7 12051.1 483.215 2
 -3 1 7 11677.5 503.158 3
 3 -1 -7 10449.2 397.428 1
 3 -1 -6 1264.7 119.593 2
 3 1 -6 1247.51 137.846 2
 -3 -1 5 2610.63 181.125 2
 3 -1 -5 2796.09 166.426 2
 3 1 -4 5180.87 256.932 2
 -3 -1 4 5215.13 260.708 2
 3 -1 -4 5270.98 238.238 2
 -3 -1 3 15201.2 596.919 2
 3 1 -3 16160.7 553.306 1
 3 1 -3 15939.8 597.168 2
 -3 1 3 14746.3 565.664 2
 3 -1 -3 16132.7 569.867 2
 3 1 -2 11645.3 416.119 1
 -3 1 2 10963.8 405.494 2
 -3 -1 2 10147 432.65 2
 -3 -1 1 394.56 103.745 2
 -3 1 1 462.682 65.3971 2
 3 1 -1 393.735 81.0777 1
 3 1 0 1804.77 133.56 1
 -3 -1 0 1697.07 137.483 1
 3 1 1 6528.56 305.12 1
 -3 -1 -1 6475.26 304.157 1
 3 -1 2 8995.2 404.6 1
 -3 -1 -3 233.642 96.7184 1
 3 -1 3 65.8606 97.4529 1
 3 1 3 158.744 105.223 1
 3 1 4 19066.1 750.586 1
 -3 1 -4 18572.7 756.869 5
 3 1 4 18294.8 742.43 6
 3 -1 4 19011.7 749.545 1
 -3 -1 -4 18978.7 756.797 5
 3 -1 4 18790.6 752.156 7
 -3 1 -5 10731.6 508.23 5
 -3 -1 -5 10373.9 503.55 5
 3 1 5 10678.1 500.214 1
 3 -1 5 10866.9 500.562 7
 3 -1 5 10562.1 492.021 1
 -3 -1 -6 6585.37 387.114 5
 3 1 6 6656.42 384.078 7
 3 -1 6 6272.49 370.778 7
 -3 1 -6 6722 391.264 5
 3 1 6 6781.49 371.601 1
 3 -1 6 6309.5 363.26 1
 -3 1 -7 24368.2 1005.3 5
 -3 -1 -7 23346.2 1003.74 5
 3 -1 7 24441.4 987.078 7
 3 1 7 23817.7 991.951 7
 -3 1 -8 2650.72 283.982 5
 3 1 8 2907.1 284.561 7
 3 -1 8 2704.88 265.316 7
 -3 1 -9 9297.98 552.899 5
 3 1 9 9930.24 551.468 7
 3 -1 9 9571.81 537.604 7
 3 -1 10 -20.8338 180.826 7
 -3 1 -10 -46.8179 186.315 5
 3 1 10 -22.7619 196.435 7
 3 -1 11 1765.43 244.897 7
 -3 1 -11 1422.76 267.309 5
 3 1 11 2118.3 289.609 7
 3 -1 12 178.452 163.093 7
 -3 -1 -12 74.1453 212.087 5
 3 1 12 114.009 191.069 7
 -3 1 -12 23.406 191.289 5
 3 1 13 3371.69 319.125 7
 -3 -1 -13 2856.37 333.448 5
 3 -1 13 3191.77 274.185 7
 -3 1 -13 3252.71 316.368 5
 3 1 14 650.675 169.066 7
 -3 -1 -14 357.727 178.402 5
 -3 1 -14 485.127 165.078 5
 -3 1 -15 2413.57 214.194 5
 -3 -1 -15 3108.98 248.822 5
 3 1 15 2691.49 205.056 7
 -3 -1 -16 545.096 103.428 5
 3 -2 -18 41.9287 73.2077 5
 -3 2 17 740.982 163.32 3
 3 -2 -17 549.054 146.068 5
 -3 2 16 290.641 171.758 3
 -3 2 16 370.878 130.086 7
 -3 2 15 2508.09 306.739 3
 -3 2 15 2727.18 261.399 7
 -3 2 14 857.097 232.377 3
 -3 2 14 877.318 193.09 7
 -3 -2 14 949.332 170.339 3
 -3 -2 13 430.849 146.514 3
 -3 2 13 744.935 235.102 3
 -3 2 13 596.03 187.147 7
 -3 2 12 339.504 178.483 7
 -3 2 12 406.58 196.264 3
 -3 -2 12 256.364 136.254 3
 -3 2 11 8450.33 486.669 7
 -3 2 11 8686.39 500.795 3
 -3 -2 11 8455.39 446.846 3
 -3 2 10 6113.71 392.216 3
 -3 2 10 6224.18 384.506 7
 -3 -2 10 5816.37 344.673 3
 -3 2 9 12751.2 606.946 7
 3 -2 -9 12710.1 576.442 2
 -3 -2 9 13968.1 577.105 3
 3 -2 -8 6548.68 334.514 2
 -3 -2 8 6580.57 328.426 3
 -3 2 7 28353 1061.78 4
 3 -2 -7 27917.7 1020.33 2
 3 -2 -7 27569 985.005 1
 -3 2 6 18567.6 738.282 4
 3 -2 -6 18693.1 697.427 2
 3 -2 -5 61711.2 2085.07 2
 3 -2 -4 11439 429.905 2
 -3 -2 3 60733.3 2050.09 1
 3 -2 -3 61624 2036.16 2
 -3 -2 2 9063.46 358.516 1
 -3 -2 1 21558.9 789.131 1
 -3 2 1 21594 736.81 2
 3 2 -1 23056 790.869 1
 -3 -2 0 31751.4 1152.48 1
 3 2 0 33530.4 1153.6 1
 -3 -2 -1 6305.66 303.067 1
 3 2 1 6248.42 299.119 1
 3 2 2 25219.9 937.343 1
 3 -2 3 14345.1 601.209 1
 3 2 4 870.289 140.826 1
 -3 -2 -4 952.606 154.664 1
 3 -2 4 1059.58 149.06 1
 3 -2 4 974.421 140.575 7
 3 2 4 809.741 136.442 7
 -3 2 -4 937.176 147.046 5
 3 2 4 743.857 138.086 6
 3 -2 5 44237.8 1656.13 1
 3 -2 5 46088.8 1658.64 7
 3 2 5 46018.2 1668.9 7
 -3 2 -5 45809.3 1669.55 5
 -3 -2 -5 46540.8 1677.69 1
 3 2 5 46304.1 1665.14 1
 3 -2 6 2048 203.836 1
 -3 2 -6 2122.47 222.377 5
 3 -2 6 2122.4 211.523 7
 -3 2 -7 28877.5 1143.38 5
 -3 -2 -7 26960.7 1138.83 5
 3 2 7 27545.4 1130.02 6
 3 -2 7 29349.7 1124.62 7
 -3 -2 -8 1728.95 254.677 5
 -3 2 -8 1467.84 217.645 5
 3 -2 8 1193.74 194.255 7
 -3 2 -9 8096.88 517.047 5
 -3 -2 -9 9045.15 553.877 5
 3 -2 9 10219.9 524.975 7
 3 2 9 9206.45 543.994 7
 -3 2 -10 318.255 190.925 5
 3 -2 10 582.738 174.757 7
 3 2 10 305.195 211.016 7
 -3 -2 -10 369.717 213.126 5
 -3 2 -11 161.335 186.01 5
 3 2 11 144.595 218.557 7
 -3 -2 -11 177.307 242.502 5
 3 -2 11 247.65 149.692 7
 3 -2 12 1732.95 209.151 7
 -3 2 -12 1820.63 250.467 5
 3 2 12 1888.27 290.462 7
 -3 2 -13 1828.18 228.254 5
 3 2 13 2054.94 273.363 7
 3 2 14 2183.73 236.669 7
 -3 2 -14 2200.86 220.662 5
 -3 2 -15 996.878 127.227 5
 3 2 15 1040.38 152.966 7
 -3 -2 -16 664.752 97.3165 5
 3 -3 -18 403.953 94.3397 5
 -3 3 17 -13.5063 123.721 3
 3 -3 -17 141.645 134.302 5
 -3 3 16 648.161 196.179 3
 -3 3 16 221.374 132.887 7
 -3 3 15 75.1764 157.461 7
 -3 3 15 -103.416 210.5 3
 -3 3 14 1994.75 267.743 7
 -3 3 13 2772.11 308.04 7
 -3 3 12 7206.96 479.065 7
 -3 3 11 2153.8 275.957 7
 -3 3 10 6226.64 405.68 7
 -3 3 9 1763.94 224.664 7
 -3 3 9 1618.05 213.292 3
 3 -3 -8 13283.1 557.497 2
 -3 3 8 13316.4 614.245 3
 3 -3 -7 927.592 106.709 2
 3 3 -7 1244.38 150.632 2
 -3 3 7 1052.19 158.285 3
 3 -3 -7 1199.51 126.839 1
 -3 -3 6 16632.9 711.422 2
 3 -3 -6 17426.7 654.832 2
 3 3 -6 18845.3 731.366 2
 -3 3 6 17878.3 720.98 3
 -3 -3 5 53364 1557 2
 -3 3 5 53173.9 1554.7 4
 3 -3 -5 53998.4 1462.52 2
 3 3 -5 53983.6 1559.72 2
 -3 3 5 51602.9 1545.97 3
 -3 -3 4 146067 4815.95 2
 -3 -3 4 145417 4741.02 1
 3 -3 -4 141950 4725.22 2
 -3 -3 3 26.9256 91.3455 2
 -3 -3 3 10.546 51.8632 1
 -3 -3 2 70770.3 2473.78 2
 -3 -3 2 73581 2443.63 1
 -3 -3 1 44082.4 1573.2 2
 -3 -3 1 45335.9 1555.21 1
 -3 -3 0 80577.9 2727.06 1
 -3 -3 0 80032.6 2735.38 2
 -3 3 -1 27094.2 926.168 2
 -3 -3 -1 29802.4 1027.63 1
 -3 3 -2 54905.5 1850.42 2
 -3 -3 -2 55953.8 1938.83 1
 3 3 3 222.014 117.624 6
 3 3 3 298.083 104.516 7
 -3 3 -3 171.804 109.368 5
 -3 3 -4 20519.7 790.76 5
 3 3 4 19721.2 781.748 6
 3 -3 4 18802.6 766.962 7
 -3 3 -4 17858.6 708.967 2
 -3 -3 -4 19298.8 791.594 1
 3 3 4 19854.6 780.945 7
 3 -3 4 18364.2 786.015 1
 3 3 5 826.301 155.747 7
 -3 -3 -5 574.269 142.305 1
 3 -3 5 460.365 145.544 1
 3 3 5 778.31 167.051 6
 3 -3 5 818.828 147.489 7
 -3 3 -5 616.668 88.1923 2
 -3 3 -5 639.095 140.685 5
 -3 3 -6 22201.9 916.938 5
 3 3 6 22235.4 924.82 7
 3 -3 6 21713.7 891.374 7
 3 -3 7 92.391 122.576 7
 3 3 7 259.975 165.701 7
 3 3 7 -70.499 162.265 6
 -3 3 -7 17.7096 136.123 5
 -3 3 -8 11784.2 601.972 5
 -3 -3 -8 12018.6 623.619 5
 3 3 8 10716.5 611.95 7
 3 -3 8 11431.7 564.877 7
 3 3 8 11531.4 614.075 6
 -3 -3 -9 717.119 217.852 5
 3 -3 9 955.148 174.258 7
 3 3 9 1106.72 255.288 6
 -3 3 -10 11090.4 599.198 5
 -3 -3 -10 10692.3 631.072 5
 3 -3 10 10786.3 548.629 7
 3 3 11 1989.09 310.791 7
 -3 -3 -11 1938.04 294.757 5
 -3 3 -11 1858.12 257.658 5
 -3 -3 -12 1035.59 239.4 5
 3 3 12 994.39 263.724 7
 -3 3 -12 804.786 180.403 5
 -3 3 -13 -114.532 133.697 5
 -3 -3 -13 332.978 190.613 5
 3 3 13 -40.6368 182.263 7
 3 3 14 193.739 154.599 7
 -3 3 -14 105.552 101.917 5
 -3 -3 -14 235.285 153.227 5
 3 3 15 255.056 112.068 7
 -3 -3 -15 96.4125 108.827 5
 -3 4 17 484.915 101.007 7
 3 -4 -17 1138.55 164.967 5
 -3 4 16 713.13 158.742 7
 -3 4 15 483.692 207.695 3
 -3 4 15 394.404 178.614 7
 -3 4 14 1816.61 268.059 7
 -3 4 14 1759.02 264.583 3
 -3 4 13 2069.73 285.854 3
 -3 4 13 1918.57 281.478 7
 -3 4 12 465.338 198.191 7
 -3 4 12 720.834 225.255 3
 -3 4 11 8284.52 523.113 7
 -3 4 11 8368.63 516.474 3
 -3 4 10 6676.81 460.098 7
 -3 4 10 7577.91 460.422 3
 -3 4 9 3190.21 292.922 7
 -3 4 9 3298.62 286.892 3
 -3 4 8 7357.78 447.166 7
 -3 4 8 8355.73 448.503 3
 3 -4 -7 5688.84 318.379 1
 -3 4 7 5102.46 344.159 4
 -3 4 7 6143.71 356.542 3
 -3 -4 6 2673.3 211.187 2
 -3 4 6 2580.96 230.51 4
 -3 4 6 2474.57 212.699 3
 3 4 -6 2731.37 217.395 2
 -3 -4 5 58774.9 1952.56 2
 -3 4 5 56451.4 1948.67 4
 3 -4 -5 52801.5 1822.86 2
 -3 -4 5 54489.1 1842.49 1
 -3 4 5 57405.4 1939.26 3
 -3 -4 4 2139.32 184.949 2
 -3 4 4 2441.28 201.064 4
 -3 4 4 2428.91 190.3 3
 -3 -4 4 2322.91 147.529 1
 -3 4 3 90194.8 3073.51 4
 -3 -4 3 86034.7 3065.98 2
 -3 -4 3 92583.8 3029.07 1
 -3 -4 2 1470.25 125.85 1
 -3 -4 2 1326.36 138.033 2
 -3 4 2 1717.55 165.007 4
 -3 -4 1 44176.3 1619.79 2
 -3 -4 1 47045.2 1612.29 1
 -3 -4 0 211.818 99.5812 1
 -3 -4 0 306.126 86.139 2
 -3 4 -1 7536 379.081 5
 -3 -4 -1 8123.89 393.651 1
 3 4 1 7877.37 380.913 6
 -3 4 -2 10722.5 434.022 5
 3 4 2 10193.5 433.872 6
 -3 -4 -2 11299.3 457.512 1
 -3 4 -3 15426 617.136 5
 3 4 3 14609.3 602.254 7
 -3 4 -3 12992 506.015 2
 -3 -4 -3 12991 611.955 1
 3 4 3 14876.4 614.763 6
 3 4 4 3980.42 283.411 6
 3 4 4 4364.85 280.584 7
 3 -4 4 3694.36 251.162 7
 -3 4 -5 162.842 124.132 5
 3 4 5 199.767 137.937 7
 3 4 5 -15.372 154.578 6
 3 -4 5 222.081 114.776 7
 -3 4 -6 114.019 127.027 5
 3 4 6 52.4376 132.415 7
 3 -4 6 125.999 115.901 7
 -3 4 -7 871.558 183.173 5
 3 4 7 1179.49 219.906 7
 -3 -4 -8 276.389 161.518 5
 3 4 8 347.59 198.372 7
 -3 4 -8 458.306 162.433 5
 3 4 8 540.973 221.542 6
 -3 4 -9 5421.56 381.26 5
 -3 -4 -9 5753.77 422.035 5
 3 4 9 4695.31 409.405 7
 3 4 9 5690.05 422.437 6
 -3 4 -10 2866.2 281.79 5
 3 4 10 2926.27 332.197 7
 -3 -4 -10 3661.18 342.883 5
 -3 4 -11 5024.78 350.603 5
 -3 -4 -11 4940.11 403.581 5
 -3 4 -12 15587.2 715.888 5
 -3 -4 -12 17361.8 802.406 5
 3 4 13 607.453 203.731 7
 -3 -4 -13 259.166 170.058 5
 -3 -4 -14 1319.94 182.043 5
 3 4 14 1528.1 196.773 7
 3 4 15 -9.63396 82.1843 7
 -3 -4 -15 -47.4421 77.0403 5
 3 -5 -17 1934.24 172.098 5
 -3 5 16 682.316 152.36 3
 -3 5 16 938.382 157.842 7
 -3 5 15 3190.86 291.945 3
 -3 5 15 3543.87 302.585 7
 -3 5 14 396.478 191.027 3
 -3 5 14 376.728 203.485 7
 -3 5 13 1108.02 258.024 7
 -3 5 13 1141.53 232.73 3
 -3 5 12 66.2914 187.392 3
 -3 5 12 71.88 174.567 7
 -3 5 11 262.128 230.237 7
 -3 5 11 86.0063 173.497 3
 -3 5 10 5288.9 391.402 3
 -3 5 9 2325.84 261.301 3
 -3 5 8 4154.11 312.534 3
 -3 5 8 4026.79 280.283 6
 -3 5 8 3848.8 321.533 7
 -3 5 7 9407.95 497.646 4
 -3 5 7 8667.74 448.501 6
 -3 5 7 9106.26 474.607 3
 -3 5 6 10468.7 519.232 4
 -3 5 6 9366.43 476.651 6
 -3 5 6 10601.3 498.747 3
 -3 5 5 785.018 145.081 3
 -3 5 5 662.862 150.118 6
 -3 5 5 571.682 151.535 4
 -3 -5 5 581.334 123.295 2
 -3 -5 4 4419.42 237.606 1
 -3 5 4 4234.28 262.229 3
 -3 5 4 3951.05 279.081 4
 -3 -5 4 4039.88 261.042 2
 -3 5 4 3952.8 276.301 6
 -3 -5 3 2031.56 164.989 1
 -3 5 3 2260.04 184.718 3
 -3 5 3 1994.34 192.991 4
 -3 -5 3 2247.25 179.272 2
 3 5 -3 2181.42 180.365 6
 -3 5 3 1969.42 204.814 6
 -3 -5 2 1126.26 128.857 2
 -3 -5 2 1232.21 128.465 1
 -3 5 2 1058.6 156.234 4
 -3 5 2 1201.44 136.092 3
 3 5 -2 1123.86 144.723 6
 -3 5 2 743.891 155.695 6
 -3 -5 1 1152.05 127.318 2
 -3 -5 1 1092.29 129.406 1
 3 5 -1 1295.34 150.477 6
 -3 5 1 980.337 151.608 4
 -3 -5 0 3419.45 245.294 1
 -3 -5 0 3311.73 225.292 2
 3 5 0 3453.53 245.657 6
 -3 -5 -1 272.933 121.867 1
 3 5 1 135.127 110.894 6
 -3 -5 -1 129.457 64.7004 2
 -3 5 -2 17288.5 716.563 5
 3 5 2 17740.4 700.084 7
 3 5 2 17016.1 732.378 6
 -3 -5 -2 17672.4 751.199 1
 -3 -5 -2 16857 721.944 2
 -3 5 -3 1229.92 155.674 5
 3 5 3 1244.47 165.869 7
 3 5 3 1531.74 199.258 6
 -3 5 -4 3067.26 236.319 5
 3 5 4 2278.55 221.809 7
 3 5 4 2723.95 263.133 6
 -3 5 -5 8025.67 440.086 5
 3 5 5 8537.2 465.033 7
 3 5 5 8724.27 488.254 6
 -3 5 -6 584.405 151.627 5
 3 5 6 279.289 159.473 7
 -3 5 -7 309.545 142.645 5
 -3 -5 -7 267.539 143.97 5
 3 5 7 330.053 176.231 7
 -3 5 -8 89.0205 126.539 5
 3 5 8 -22.3365 191.656 7
 -3 -5 -8 20.9233 148.705 5
 3 5 8 87.5855 213.447 6
 -3 -5 -9 2763.16 299.184 5
 -3 5 -9 3017.8 267.192 5
 3 5 9 3060.48 348.373 6
 3 5 9 3278.82 342.259 7
 -3 5 -10 50.1219 118.806 5
 3 5 10 89.4719 220.032 6
 3 5 10 188.334 208.959 7
 -3 -5 -10 266.931 169.763 5
 -3 -5 -11 8144.88 507.405 5
 3 5 11 9135.56 546.153 7
 -3 -5 -12 634.179 183.98 5
 3 5 12 745.152 213.608 7
 -3 -5 -13 9268.37 479.36 5
 -3 -5 -14 841.703 135.999 5
 -3 6 16 3705.31 240.769 7
 -3 6 16 3552.91 232.262 3
 -3 6 15 94.7077 127.834 3
 -3 6 15 368.412 154.425 7
 -3 6 14 1202.32 207.057 3
 -3 6 14 1447.82 237.681 7
 -3 6 13 152.636 202.754 7
 -3 6 13 -133.531 165.569 3
 -3 6 12 346.734 192.777 3
 -3 6 11 1972.02 259.951 3
 -3 6 10 1808.03 252.482 3
 -3 6 10 1908.81 295.733 7
 -3 6 9 1229.13 217.713 3
 -3 6 9 1117.23 235.522 7
 -3 6 9 901.661 180.048 6
 -3 6 8 5390.74 372.151 3
 -3 6 8 5385.26 358.038 6
 -3 6 7 -15.99 121.1 3
 -3 6 7 99.4139 152.811 7
 -3 6 7 31.6464 134.181 6
 -3 6 6 537.517 147.173 3
 -3 6 6 377.761 147.094 4
 -3 6 6 251.77 147.584 6
 -3 6 5 1927.87 218.282 4
 -3 6 5 1729.96 189.873 3
 -3 6 5 1615.58 214.534 6
 -3 6 4 937.518 141.104 3
 -3 6 4 749.713 163.638 4
 3 6 -4 767.633 142.125 6
 -3 6 4 883.352 182.841 6
 -3 6 3 880.07 154.56 4
 3 6 -3 814.062 147.011 6
 -3 6 3 1214.37 202.365 6
 -3 -6 2 237.423 90.8075 1
 -3 6 2 243.231 127.231 4
 3 6 -2 140.671 124.877 6
 -3 6 2 317.21 165.538 6
 -3 6 1 187.385 123.01 4
 3 6 -1 240.318 137.127 6
 -3 6 1 97.731 160.312 6
 -3 6 0 1125.58 160.499 4
 3 6 0 1445.94 196.058 6
 3 6 1 2919.12 259.506 6
 3 6 2 4510.74 326.895 6
 3 6 3 1356.22 168.951 7
 3 6 3 1249.56 214.442 6
 3 6 4 2018.03 260.414 6
 3 6 4 1730.48 199.343 7
 3 6 5 1047.41 190.912 7
 3 6 5 1121.36 235.018 6
 -3 -6 -6 3001.79 255.144 5
 3 6 6 3660.43 315.44 7
 3 6 7 1198.31 219.674 7
 -3 -6 -7 1072.04 187.77 5
 -3 -6 -8 3410.5 297.025 5
 3 6 8 3034.39 314.44 7
 3 6 8 4032.93 391.348 6
 3 6 9 4470.39 373.247 7
 -3 -6 -9 3754.46 326.857 5
 3 6 9 4255.07 395.94 6
 3 6 10 4391.98 377.227 6
 3 6 10 3568.58 341.182 7
 -3 -6 -10 3425.76 303.115 5
 3 6 11 159.53 178.044 7
 -3 -6 -11 222.844 139.322 5
 3 6 12 565.441 171.771 7
 -3 -6 -12 582.536 148.746 5
 -3 6 -13 436.862 109.16 6
 3 6 13 589.646 147.509 7
 3 6 14 968.268 118.461 7
 -3 7 15 2527.35 210.795 7
 -3 7 15 2049.32 168.816 3
 -3 7 14 2251.49 209.063 3
 -3 7 13 1878.12 215.98 3
 -3 7 12 2149.59 238.36 3
 -3 7 12 2623.58 302.73 7
 -3 7 11 163.697 154.257 3
 -3 7 11 -45.8974 212.342 7
 -3 7 10 1461.64 212.67 3
 -3 7 10 1107.92 261.637 7
 -3 7 9 1315.09 206.728 6
 -3 7 9 1620.39 214.907 3
 -3 7 9 1564.64 264.639 7
 -3 7 8 2160.93 235.393 3
 -3 7 8 1980.02 277.669 7
 -3 7 8 1622.87 227.544 6
 -3 7 7 961.39 218.919 7
 -3 7 7 1249.24 186.71 3
 -3 7 7 730.102 193.025 6
 -3 7 6 5046.82 363.926 6
 -3 7 6 4243.01 299.191 3
 -3 7 6 4854.46 366.995 7
 -3 7 5 1013.12 190.09 4
 -3 7 5 908.98 213.645 6
 3 7 -5 1156.15 170.501 6
 3 7 -4 5247.63 348.793 6
 -3 7 4 6221.78 369.459 4
 -3 7 4 5896.95 408.531 6
 -3 7 3 331.227 136.705 4
 3 7 -3 105.363 142.186 6
 -3 7 3 168.421 180.894 6
 -3 7 2 5494.92 338.374 4
 3 7 -2 5542.97 364.084 6
 -3 7 2 5930.79 402.025 6
 -3 7 1 2999.03 240.274 4
 3 7 -1 2742.7 268.717 6
 -3 7 1 3092.25 315.412 6
 3 7 0 6319.8 394.389 6
 -3 7 0 5466.37 402.458 6
 -3 7 -1 1487.56 264.032 6
 3 7 1 1765.28 246.977 6
 3 7 2 11496.7 598.433 6
 3 7 3 1747.23 250.256 6
 3 7 4 3205.43 263.515 7
 3 7 4 3809.18 354.308 6
 3 7 5 823.091 170.042 7
 3 7 5 1033.13 272.375 6
 3 7 6 3507.54 297.752 7
 3 7 7 6037.12 407.776 7
 3 7 8 2705.75 291.73 7
 3 7 9 2319.64 281.008 7
 3 7 9 3598.7 342.068 6
 3 7 10 315.069 166.516 7
 3 7 10 248.628 199.633 6
 -3 7 -11 1628.16 213.231 6
 3 7 11 1992.81 223.512 7
 3 7 12 -12.9614 115.654 7
 -3 7 -12 84.0943 110.04 6
 3 7 13 438.813 99.4207 7
 -3 8 14 267.368 115.667 7
 -3 8 13 1991.15 217.388 7
 -3 8 12 127.97 105.556 3
 -3 8 12 160.761 166.97 7
 -3 8 11 3979.15 340.41 7
 -3 8 11 4394.77 288.954 3
 -3 8 10 341.661 206.276 7
 -3 8 10 -28.9784 118.409 3
 -3 8 9 10049.8 564.051 7
 -3 8 9 8665.77 486.071 6
 -3 8 8 396.394 205.874 7
 -3 8 8 73.96 158.771 6
 -3 8 7 4906.93 377.365 7
 -3 8 7 4124.16 353.11 6
 -3 8 6 738.404 189.825 7
 -3 8 6 448.021 195.871 6
 -3 8 5 6582.73 428.431 7
 -3 8 5 7560 482.278 6
 3 8 -5 6560.97 396.645 6
 3 8 -4 365.632 161.579 6
 -3 8 4 338.616 199.934 6
 -3 8 4 236.669 147.178 7
 3 8 -3 4708.94 343.865 6
 -3 8 3 4236.57 378.232 6
 3 8 -2 609.443 187.834 6
 -3 8 2 522.772 230.546 6
 3 8 -1 8328.55 488.218 6
 -3 8 1 7640.23 512.21 6
 3 8 0 -38.5072 179.053 6
 -3 8 0 363.512 235.975 6
 3 8 1 14136 702.016 6
 -3 8 -1 13631.5 738.487 6
 3 8 2 186.737 202.344 6
 3 8 3 7707.42 503.772 6
 -3 8 -4 220.227 247.019 6
 3 8 4 87.8109 228.946 6
 -3 8 -5 1708.82 318.563 6
 3 8 5 1669.6 299.986 6
 -3 8 -6 501.798 249.841 6
 3 8 6 509.596 270.27 6
 3 8 6 619.023 159.703 7
 -3 8 -7 3440.41 368.222 6
 3 8 7 3518.01 287.26 7
 -3 8 -8 314.185 214.163 6
 3 8 8 168.07 140.981 7
 -3 8 -9 3185.61 309.924 6
 3 8 9 3730.05 283.98 7
 3 8 9 4031.41 342.107 6
 3 8 10 1039.27 163.468 7
 3 8 10 1306.79 210.081 6
 -3 8 -10 996.884 189.605 6
 3 8 11 2010.09 181.949 7
 -3 8 -11 2269.69 197.222 6
 -3 9 13 77.6934 88.9872 7
 -3 9 12 435.335 132.677 7
 -3 9 11 167.63 134.611 7
 -3 9 10 1985.33 238.944 7
 -3 9 9 91.8829 153.035 7
 -3 9 9 43.7572 129.456 6
 -3 9 8 723.292 193.748 7
 -3 9 8 428.241 164.156 6
 -3 9 7 76.6429 153.59 7
 -3 9 7 209.798 174.744 6
 -3 9 6 3850.31 311.112 7
 -3 9 6 3294.66 335.687 6
 -3 9 5 1492.5 208.785 7
 -3 9 5 1614.3 268.895 6
 3 9 -5 1844.33 213.889 6
 -3 9 4 3952.54 298.776 7
 3 9 -4 3504.99 293.305 6
 -3 9 4 3880.12 364.598 6
 3 9 -3 981.335 195.804 6
 -3 9 3 980.374 252.514 6
 3 9 -2 5304.26 382.791 6
 -3 9 2 4859.56 420.951 6
 3 9 -1 157.972 180.863 6
 -3 9 1 -165.571 231.6 6
 3 9 0 9447.17 546.567 6
 -3 9 0 9665.88 607.543 6
 3 9 1 1153.37 252.852 6
 -3 9 -1 847.672 255.615 6
 3 9 2 19374.2 899.897 6
 3 9 3 172.589 219.635 6
 3 9 4 10342.4 596.739 6
 -3 9 -4 10179.8 616.594 6
 3 9 5 189.836 213.85 6
 -3 9 -5 137.541 231.429 6
 3 9 6 5062.3 404.421 6
 -3 9 -6 4903.82 400.755 6
 -3 9 -7 605.282 216.926 6
 -3 9 -8 4663.46 350.791 6
 3 9 9 115.891 154.573 6
 -3 9 -9 -54.525 136.419 6
 -3 9 -10 2107.55 178.461 6
 -3 10 11 902.015 116.68 7
 -3 10 10 402.346 116.334 7
 -3 10 9 1603.34 177.7 7
 -3 10 9 1472.59 158.958 6
 -3 10 8 604.996 146.034 7
 -3 10 8 937.856 168.601 6
 -3 10 7 3684.52 296.529 6
 -3 10 7 2991.74 242.88 7
 -3 10 6 976.334 208.679 6
 -3 10 5 2253.84 267.981 6
 3 10 -4 876.97 175.396 6
 -3 10 4 1122.48 242.997 6
 3 10 -3 318.886 168.108 6
 -3 10 3 21.6716 223.385 6
 -3 10 2 488.873 235.707 6
 3 10 -2 375.329 177.849 6
 3 10 -1 298.72 198.506 6
 -3 10 1 -67.6393 217.83 6
 3 10 0 1310.18 241.056 6
 -3 10 0 1341.84 278.524 6
 3 10 1 2076.08 276.855 6
 -3 10 -1 1653.43 294.533 6
 3 10 2 274.629 192.284 6
 3 10 3 2651.36 296.007 6
 3 10 4 224.735 199.552 6
 -3 10 -4 696.679 234.904 6
 3 10 5 353.859 203.07 6
 -3 10 -5 606.089 214.461 6
 3 10 6 846.668 203.465 6
 -3 10 -6 863.821 213.241 6
 -3 10 -7 1068.91 188.906 6
 -3 10 -8 1808.35 190.894 6
 -3 10 -9 702.865 108.636 6
 -3 11 8 -64.8173 82.8259 6
 -3 11 7 143.707 114.902 6
 -3 11 6 26.7335 133.201 6
 -3 11 5 212.864 154.899 6
 -3 11 4 182.516 168.972 6
 3 11 -3 319.604 133.854 6
 -3 11 3 493.699 194.781 6
 3 11 -2 323.238 144.042 6
 -3 11 2 366.985 203.314 6
 3 11 -1 -14.9063 149.182 6
 -3 11 1 -56.0575 182.967 6
 3 11 0 215.817 157.573 6
 -3 11 0 -37.3664 182.97 6
 3 11 1 981.179 199.105 6
 3 11 2 292.572 165.809 6
 3 11 3 222.962 158.725 6
 -3 11 -3 149.374 182.449 6
 -3 11 -4 349.233 174.568 6
 3 11 4 222.873 145.514 6
 3 11 5 683.975 161.896 6
 -3 11 -5 533.773 157.902 6
 3 11 6 232.84 129.019 6
 -3 11 -6 55.3477 113.669 6
 3 11 7 853.173 129.478 6
 -3 11 -7 763.124 118.558 6
 -3 12 5 442.498 112.402 6
 -3 12 4 -42.3972 110.524 6
 -3 12 3 362.472 137.776 6
 -3 12 2 61.9276 133.652 6
 3 12 -1 1146.5 136.47 6
 -3 12 1 1294.92 182.361 6
 3 12 0 314.871 115.691 6
 -3 12 0 430.722 150.096 6
 3 12 1 48.5106 100.774 6
 3 12 2 9.45186 93.7806 6
 -3 12 -3 82.4493 114.076 6
 3 12 3 114.965 91.1735 6
 3 12 4 -55.0557 80.7051 6
 -3 12 -4 78.3846 90.8102 6
 -4 0 17 -133.637 114.712 3
 -4 0 16 2433.66 245.155 3
 -4 0 15 -75.6931 152.653 3
 -4 0 14 5246.92 388.627 3
 -4 0 13 20.3818 165.476 3
 -4 0 12 771.094 187.899 3
 -4 0 11 -123.526 144.251 3
 -4 0 10 1061.69 177.358 3
 -4 0 10 1189.94 162.007 7
 -4 0 9 106.642 95.616 7
 -4 0 9 56.5199 119.138 3
 -4 0 8 1780.54 190.398 3
 4 0 -8 2217.86 187.463 2
 4 0 -7 -21.9797 70.4462 2
 -4 0 7 -9.94518 91.0899 4
 -4 0 7 55.2979 112.092 3
 4 0 -6 14291.1 562.435 2
 -4 0 6 12685.8 560.617 3
 4 0 -5 40.3919 41.4586 1
 4 0 -5 41.3328 70.9433 2
 -4 0 5 64.4274 75.6353 2
 -4 0 4 18216.7 684.947 2
 4 0 -4 18032.6 651.633 1
 -4 0 3 33.4048 68.576 2
 4 0 -3 72.5287 69.0831 1
 4 0 -2 18882.1 718.14 1
 -4 0 2 20134.3 723.526 2
 -4 0 1 6.62654 79.9438 2
 4 0 -1 51.667 77.5686 1
 4 0 0 48010.5 1675.11 1
 4 0 1 18.9428 88.9382 1
 4 0 2 472.753 118.318 7
 4 0 3 23.9884 102.912 1
 -4 0 -3 -12.2909 104.842 5
 4 0 4 7277.16 400.829 1
 -4 0 -4 8068.67 416.972 5
 -4 0 -5 15.8545 124.47 5
 4 0 5 108.609 132.349 7
 4 0 5 -76.0326 114.3 1
 4 0 6 14969.4 700.065 7
 4 0 7 -38.7717 147.91 7
 4 0 8 14234.1 717.727 7
 4 0 9 -136.411 185.829 7
 4 0 10 13845.4 713.532 7
 -4 0 -10 12992.9 720.947 5
 -4 0 -11 73.6225 208.123 5
 4 0 11 113.221 194.315 7
 4 0 12 8685.58 515.241 7
 -4 0 -12 8601.64 538.261 5
 4 0 13 183.962 148.449 7
 -4 0 -13 -19.3798 175.713 5
 -4 0 -14 5981.15 358.336 5
 4 0 14 5413.23 312.057 7
 -4 0 -15 19.5667 91.8671 5
 4 -1 -17 -125.084 117.472 5
 -4 1 17 54.4548 127.85 3
 -4 -1 16 4581.65 311.083 3
 -4 1 16 6176.86 386.347 3
 -4 -1 15 498.364 161.557 3
 -4 1 15 710.999 212.638 3
 -4 1 14 4079.25 362.915 3
 -4 1 14 3810.09 293.902 7
 -4 -1 14 3981.58 315.043 3
 -4 -1 13 203.912 150.514 3
 -4 1 13 43.3675 174.909 3
 -4 1 13 -17.726 121.645 7
 -4 1 12 3465.1 325.072 3
 -4 1 12 3082.75 269.782 7
 -4 -1 12 2491.46 265.512 3
 -4 1 11 585.488 187.55 3
 -4 1 11 716.076 164.174 7
 -4 -1 11 471.963 154.007 3
 -4 -1 10 731.503 151.349 3
 -4 1 10 732.316 181.191 3
 -4 1 10 703.073 158.588 7
 -4 -1 9 441.53 127.515 3
 -4 1 9 593.974 151.235 3
 -4 1 9 416.128 127.327 7
 4 -1 -8 435.638 100.137 2
 4 1 -8 598.725 125.423 2
 -4 -1 8 550.532 123.586 3
 -4 1 8 469.188 136.901 4
 -4 1 8 674.217 147.04 3
 4 -1 -7 127.485 35.5777 1
 4 -1 -7 10.014 66.2361 2
 4 1 -7 205.466 98.807 2
 4 -1 -7 52.4113 31.9191 1
 -4 1 7 282.734 117.958 4
 -4 -1 7 131.353 95.8417 3
 -4 1 7 144.408 113.039 3
 -4 1 6 19847.7 792.629 4
 -4 -1 6 20384.9 796.208 2
 4 -1 -6 21043.8 775.477 2
 4 1 -6 20617.6 800.454 2
 -4 1 6 19850.7 803.565 3
 -4 -1 5 2240.99 178.139 2
 4 1 -5 2373.71 176.783 2
 4 -1 -5 2744.03 172.63 2
 -4 1 5 2563.07 199.803 3
 -4 1 4 12700.4 493.718 2
 -4 -1 4 12408.2 523.862 2
 4 1 -4 13010.1 469.484 1
 -4 1 3 341.98 72.7682 2
 -4 -1 3 266.303 87.263 2
 4 1 -3 257.712 68.5976 1
 4 1 -2 13242.8 514.496 1
 -4 1 2 13838.8 501.747 2
 -4 -1 2 12437.9 527.781 2
 4 1 -1 10779.7 446.649 1
 4 -1 -1 10410.7 453.833 1
 -4 1 1 10888.6 421.197 2
 -4 -1 1 11126.2 457.486 2
 4 1 0 4520.11 250.385 1
 4 -1 0 4245.84 253.189 1
 4 -1 1 20018.1 784.806 1
 4 1 1 19978.9 778.909 1
 4 1 2 5225.73 300.045 1
 4 1 2 5208.81 299.185 7
 4 -1 2 5695.88 311.986 7
 -4 -1 -3 55131.6 1938.88 5
 4 -1 3 55411.6 1945.64 7
 4 1 3 54936.8 1941.46 7
 4 1 3 53869.6 1921.56 6
 4 -1 3 53700.7 1940.43 1
 4 1 4 1994.75 201.263 1
 4 -1 4 2055.49 201.342 1
 -4 -1 -4 2179.66 213.135 5
 4 -1 4 2053.41 209.167 7
 4 1 4 2458.15 221.235 7
 4 1 4 2156.8 200.632 6
 -4 1 -5 56434.9 2067.08 5
 -4 -1 -5 57355.1 2063.83 5
 4 -1 5 57698.3 2059.87 7
 4 -1 5 56311.3 2056.28 1
 -4 1 -6 3258.97 285.006 5
 -4 -1 -6 2813.3 274.517 5
 4 -1 6 2874 273.037 7
 4 1 7 27256 1182.85 7
 -4 1 -7 30125.4 1208.09 5
 -4 -1 -7 29969.5 1204.13 5
 4 -1 7 29151.6 1183.89 7
 -4 1 -8 11328.6 607.779 5
 -4 -1 -8 9974.79 585.355 5
 4 1 8 10930.2 598.084 7
 4 -1 8 9675.35 560.961 7
 -4 1 -9 1186.4 246.421 5
 -4 -1 -9 1376.05 260.343 5
 4 -1 9 1619.16 248.515 7
 4 1 9 1192.99 259.81 7
 4 -1 10 1157.55 228.129 7
 4 1 10 1157.9 262.462 7
 -4 1 -10 807.49 235.521 5
 4 1 11 9353.65 568.858 7
 -4 1 -11 9650.99 577.84 5
 4 -1 11 9170.26 537.387 7
 4 -1 12 56.276 139.984 7
 4 1 12 234.618 190.348 7
 -4 1 -12 131.527 189.219 5
 -4 1 -13 8337.24 478.539 5
 4 1 13 8579.07 472.408 7
 4 -1 13 7468.5 422.529 7
 -4 1 -14 223.215 125.868 5
 4 1 14 51.7656 114.912 7
 -4 -1 -14 90.5083 138.921 5
 -4 1 -15 1632.23 145.228 5
 -4 -1 -15 2441 181.652 5
 -4 2 17 2177.01 221.46 3
 -4 2 16 71.5532 168.8 3
 -4 2 15 719.821 164.078 7
 -4 2 15 250.167 193.644 3
 -4 2 14 3297.01 343.934 3
 -4 2 14 2774.32 271.267 7
 -4 2 13 12584.7 654.997 7
 -4 -2 13 12768.9 610.576 3
 -4 2 13 14156.7 704.992 3
 -4 2 12 474.443 212.167 3
 -4 -2 12 78.3623 129.803 3
 -4 2 12 119.486 152.029 7
 -4 2 11 12801 633.07 7
 -4 -2 11 12434.3 584.121 3
 -4 2 11 12620.9 647.305 3
 -4 2 10 819.722 188.341 3
 -4 -2 10 618.768 136.511 3
 -4 2 10 767.193 173.039 7
 -4 -2 9 17599.4 717.531 3
 -4 2 9 17302.4 773.604 3
 -4 2 8 2832.91 246.914 4
 -4 2 8 2713.83 243.199 3
 4 -2 -8 2432.92 188.106 2
 -4 2 7 5854.57 349.941 4
 4 -2 -7 6569.78 307.732 2
 4 2 -7 5480.52 333.648 2
 -4 -2 6 4991.26 293.729 2
 -4 2 6 5060.28 303.935 4
 4 -2 -6 5165.92 251.493 2
 4 2 -6 4686.48 290.528 2
 -4 -2 5 55935.3 2016.4 2
 -4 2 5 56723.1 2019.61 4
 4 -2 -5 59897.4 1959.11 2
 4 2 -5 56155 2015.99 2
 -4 2 4 4938.43 281.791 4
 -4 -2 4 4801.47 270.159 2
 -4 2 4 4599.44 276.716 3
 -4 -2 3 35443.3 1279.99 2
 -4 -2 2 14677.2 562.071 1
 -4 2 2 14255.7 510.944 2
 -4 -2 2 14041.8 584.942 2
 4 2 -2 14416.3 553.504 1
 -4 -2 1 10306.4 428.569 1
 -4 2 1 9664.67 365.151 2
 4 2 -1 9756.05 415.357 1
 -4 -2 1 9626.69 436.637 2
 -4 -2 0 3485.88 223.412 1
 4 2 0 3212.12 212.727 1
 -4 2 0 3594.29 168.996 2
 -4 2 -1 21274.7 832.019 5
 4 2 1 20788 816.588 1
 -4 -2 -1 21551.1 829.947 1
 4 -2 1 20843.1 828.584 7
 -4 -2 -2 388.713 114.524 1
 4 -2 2 364.269 133.412 1
 -4 2 -2 282.952 111.415 5
 4 -2 2 251.916 114.193 7
 4 2 2 398.758 115.694 6
 4 2 2 210.749 103.648 7
 4 2 2 353.106 117.803 1
 -4 2 -3 5986.73 361.356 5
 -4 -2 -3 7037.76 360.859 5
 4 2 3 6483.14 355.685 7
 4 -2 3 6613.44 365.916 7
 4 -2 3 6120.54 361.867 1
 4 2 3 6643.6 349.184 6
 -4 2 -4 14028.9 632.484 5
 -4 -2 -4 13943.4 618.698 5
 4 2 4 13064.4 614.973 7
 4 2 4 14089 615.018 6
 4 -2 4 13140.8 618.176 1
 4 2 4 13604.5 621.413 1
 4 -2 4 14204.5 626.382 7
 -4 2 -5 7397.4 435.721 5
 -4 -2 -5 7272.68 427.216 5
 4 -2 5 7493.69 425.383 7
 4 2 5 8677.79 453.427 7
 4 2 5 7836.98 431.932 6
 -4 2 -6 26643.4 1115.71 5
 -4 -2 -6 27207.6 1112.66 5
 4 2 6 28027.2 1120.37 7
 4 2 6 27289.7 1110.05 6
 4 -2 6 26965.4 1102.04 7
 -4 2 -7 4627.24 354.934 5
 -4 -2 -7 4564.17 360.77 5
 4 -2 7 4312.04 331.707 7
 -4 2 -8 9053.46 538.656 5
 4 -2 8 9489.22 519.547 7
 4 -2 9 1922.51 245.377 7
 -4 2 -9 2082.04 267.403 5
 4 2 9 2224.12 308.362 7
 -4 -2 -9 2095.05 295.656 5
 4 2 10 24.5383 211.862 7
 4 -2 10 145.013 159.345 7
 -4 -2 -10 322.906 209.472 5
 -4 2 -10 308.539 186.441 5
 -4 2 -11 250.69 194.434 5
 -4 -2 -11 121.05 202.869 5
 4 -2 11 76.7053 141.984 7
 4 2 11 23.815 207.901 7
 4 2 12 3438.87 328.542 7
 -4 -2 -12 2543.06 306.724 5
 -4 2 -12 2737.13 289.291 5
 4 -2 12 2833.24 250.18 7
 -4 2 -13 333.509 154.633 5
 -4 -2 -13 280.339 171.494 5
 4 2 13 338.75 172.533 7
 -4 2 -14 1092.57 149.055 5
 4 2 14 920.698 159.3 7
 -4 3 17 159.757 137.812 3
 -4 3 16 2079.19 252.021 3
 -4 3 16 1015.08 163.293 7
 -4 3 15 575.665 175.4 7
 -4 3 15 451.49 206.965 3
 -4 3 14 2336.83 305.14 3
 -4 3 14 1873.25 255.836 7
 -4 3 13 327.063 194.839 7
 -4 3 12 21284.6 961.021 7
 -4 3 11 586.701 203.304 7
 -4 3 10 19800.7 888.033 7
 -4 3 8 14382.9 650.218 4
 -4 3 8 13272.5 641.21 3
 -4 3 7 1576.27 204.251 4
 -4 3 7 1608.34 194.23 3
 4 -3 -6 17939.2 661.671 2
 -4 3 6 18090.7 752.803 3
 -4 3 5 6943.62 371.604 3
 -4 3 4 73767.7 2555.99 3
 -4 3 3 284.815 113.562 3
 -4 -3 3 210.147 64.0428 1
 -4 3 3 234.906 121.368 4
 -4 3 2 58395.7 2079.47 3
 -4 -3 2 60332.8 2050.48 1
 -4 3 1 3955.71 251.582 3
 -4 -3 1 3851.67 230.85 1
 -4 3 0 36438.3 876.386 5
 -4 -3 0 34239.8 842.212 1
 -4 3 -1 359.62 125.047 5
 4 -3 1 341.8 119.959 7
 -4 -3 -1 250.091 107.312 1
 4 3 1 314.883 103.457 6
 -4 3 -2 35917.4 1322.83 5
 4 3 2 34416.8 1287.82 6
 4 3 2 36190.5 1299.12 7
 -4 -3 -2 34202.1 1317.31 1
 4 -3 2 35309.2 1315.82 7
 -4 3 -3 7095.39 401.329 5
 -4 -3 -3 7351.28 376.164 5
 4 -3 3 7157.99 393.543 7
 4 -3 3 7415.36 410.401 1
 4 3 3 7307.93 387.318 6
 4 3 3 7753.97 396.027 7
 -4 -3 -3 6754.16 403.527 1
 -4 3 -4 8859.47 466.505 5
 -4 -3 -4 8518.35 441.302 5
 4 -3 4 8312.86 447.685 7
 4 3 4 8764.4 454.78 6
 4 3 4 8875.41 455.326 7
 4 3 5 2309.36 246.69 6
 4 3 5 2275.48 241.982 7
 -4 -3 -5 2349.74 235.337 5
 4 -3 5 2352.47 237.845 7
 -4 3 -5 1712.84 219.901 5
 -4 3 -6 2369.87 257.23 5
 4 -3 6 2779.88 254.787 7
 4 3 6 2726.88 273.17 7
 -4 -3 -6 2308.69 242.447 5
 4 3 6 2192.72 262.62 6
 4 -3 7 977.051 185.627 7
 4 3 7 567.416 193.347 7
 -4 3 -7 1132.32 212.075 5
 -4 -3 -7 656.34 181.001 5
 -4 -3 -8 224.419 187.015 5
 4 3 8 228.588 205.18 7
 4 -3 8 346.653 164.439 7
 -4 3 -8 87.7837 170.039 5
 -4 3 -9 113.485 170.642 5
 -4 -3 -9 23.732 177.064 5
 4 -3 9 174.49 145.775 7
 -4 -3 -10 939.177 232.61 5
 4 -3 10 1163.35 197.323 7
 -4 3 -10 763.711 207.087 5
 -4 3 -11 5913.71 406.161 5
 -4 -3 -11 6317.85 452.97 5
 4 -3 11 5259.27 347.984 7
 -4 3 -12 17.9412 140.859 5
 -4 -3 -12 -185.445 172.639 5
 4 3 12 41.7889 172.916 7
 -4 3 -13 330.534 129.714 5
 -4 -3 -13 204.075 152.073 5
 4 3 13 409.39 173.898 7
 -4 -3 -14 364.16 123.224 5
 -4 3 -14 295.473 85.9483 5
 4 3 14 74.5715 111.785 7
 -4 4 17 1360.58 129.925 7
 -4 4 16 875.906 164.193 7
 -4 4 15 2334.73 259.766 7
 -4 4 14 -126.42 165.467 7
 -4 4 13 1461.44 264.296 3
 -4 4 13 1297.96 247.063 7
 -4 4 12 1677.18 281.761 3
 -4 4 12 1865.48 295.127 7
 -4 4 11 8124.74 514.819 7
 -4 4 11 7903.45 508.029 3
 -4 4 10 3495.28 324.333 7
 -4 4 10 2378.74 291.261 3
 -4 4 9 6461.9 416.289 3
 -4 4 9 6079.38 415.998 7
 -4 4 8 119.176 144.421 3
 -4 4 7 14220.3 660.995 4
 -4 4 7 14049.8 651.145 3
 -4 4 6 36471.6 1381.07 4
 -4 4 6 36049.2 1367.36 3
 -4 -4 5 13530.4 632.877 2
 -4 4 5 14819.5 650.169 4
 -4 4 5 15134 640.363 3
 -4 4 4 16679.2 712.23 4
 -4 -4 4 16796.5 704.573 2
 -4 -4 4 16019.3 630.565 1
 -4 4 4 17233.5 700.576 3
 -4 4 3 12269.1 559.205 4
 -4 -4 3 12002.5 554.041 2
 -4 -4 3 12569 511.035 1
 -4 4 3 11666.1 530.933 6
 -4 4 3 13504 561.682 3
 -4 -4 2 8980.15 455.943 2
 -4 -4 2 9958.48 434.671 1
 -4 4 2 9918.28 461.892 3
 -4 4 1 11700.1 516.176 3
 -4 -4 1 11315 500.279 1
 -4 -4 1 10835.2 514.761 2
 -4 4 0 4434.58 275.471 3
 4 4 0 3816.05 247.147 6
 -4 -4 0 4366.98 271.674 1
 -4 -4 0 3792.62 264.45 2
 -4 4 -1 11299 528.869 5
 4 4 1 11264.8 487.353 7
 4 4 1 11155.3 502.707 6
 -4 -4 -1 10670.2 516.509 1
 -4 -4 -1 10579.2 515.416 2
 -4 4 -2 9326.47 476.769 5
 4 4 2 9598.63 451.509 7
 -4 -4 -2 8870.25 472.865 1
 4 4 2 9699.37 463.432 6
 -4 4 -3 5295.83 338.514 5
 4 4 3 5460.3 344.713 6
 4 4 3 5304.65 324.871 7
 -4 4 -4 8902.38 480.265 5
 -4 -4 -4 9042.01 449.828 5
 4 4 4 8690.07 466.563 7
 4 4 4 8840.11 480.249 6
 4 -4 4 8456.47 455.896 7
 -4 4 -5 2382.75 248.38 5
 4 -4 5 2770.52 251.346 7
 4 4 5 2623.23 265.488 7
 -4 -4 -5 2426.21 235.353 5
 4 4 5 2702.05 268.313 6
 -4 -4 -6 1247.32 204.77 5
 -4 4 -6 1618.99 223.344 5
 4 4 6 1600.88 233.839 7
 4 -4 6 1201 194.849 7
 4 4 6 1690.47 248.135 6
 -4 4 -7 102.387 150.384 5
 4 -4 7 -53.2382 128.241 7
 -4 -4 -7 61.0309 149.402 5
 4 4 7 64.9907 177.023 7
 -4 4 -8 3334.65 307.785 5
 -4 -4 -8 2545.53 291.108 5
 4 -4 8 3253.42 274.241 7
 4 4 8 3639.39 349.086 7
 -4 4 -9 85.018 153.59 5
 -4 -4 -9 -22.7622 165.827 5
 4 4 9 -48.009 214.18 7
 -4 4 -10 1050.35 201.629 5
 -4 -4 -10 1284.2 233.555 5
 4 4 10 1382.89 275.669 7
 -4 4 -11 125.003 129.092 5
 -4 -4 -11 20.9453 153.858 5
 4 4 11 267.201 225.708 7
 -4 4 -12 2356.33 221.375 5
 -4 -4 -12 2608.13 263.805 5
 -4 -4 -13 315.328 136.275 5
 -4 -4 -14 1016.11 132.942 5
 4 4 14 1086.65 143.832 7
 -4 5 17 1129.92 138.038 3
 -4 5 16 690.832 152.292 3
 -4 5 16 520.837 138.442 7
 -4 5 15 473.833 186.398 3
 -4 5 15 784.341 183.775 7
 -4 5 14 1086.69 216.95 3
 -4 5 14 796.654 224.15 7
 -4 5 13 625.996 216.155 3
 -4 5 13 681.719 217.508 7
 -4 5 12 191.585 207.867 7
 -4 5 12 -22.1853 196.895 3
 -4 5 11 218.383 198.11 3
 -4 5 11 240.223 210.985 7
 -4 5 10 232.429 214.401 7
 -4 5 10 585.461 205.186 3
 -4 5 9 450.857 190.785 3
 -4 5 8 1281.76 229.943 4
 -4 5 8 1107.79 208.709 3
 -4 5 7 2054.91 251.578 4
 -4 5 7 2157.29 233.891 3
 -4 5 6 676.372 186.749 4
 -4 5 6 564.348 158.401 3
 -4 5 5 2462.37 237.575 4
 -4 5 5 2334.01 222.207 3
 -4 5 5 2116.19 202.762 6
 -4 5 4 1017.17 173.712 4
 -4 5 4 920.585 155.722 3
 -4 5 4 695.732 146.73 6
 -4 5 3 199.914 136.024 4
 -4 -5 3 21.2905 68.9467 1
 -4 5 3 -50.858 113.446 3
 -4 5 3 -26.754 121.267 6
 -4 -5 2 7950.79 386.155 1
 -4 5 2 7574.77 420.113 4
 4 5 -2 7668.41 376.742 6
 -4 5 2 7014.59 411.405 6
 -4 5 2 8083 402.454 3
 4 5 -1 4045.11 264.075 6
 -4 -5 1 4189.33 273.642 1
 -4 5 1 3964.01 265.188 3
 -4 5 0 15251.1 636.353 3
 4 5 0 14104.7 628.984 6
 -4 -5 0 14537.8 654.188 1
 -4 5 -1 31782.4 1186.95 3
 4 5 1 30727.6 1191.51 6
 -4 5 -2 10450.8 516.176 5
 -4 5 -2 10246.2 489.645 3
 4 5 2 9657.84 475.594 7
 4 5 2 10982.5 524.186 6
 -4 5 -3 12590.7 601.01 5
 4 5 3 12767 584.721 7
 4 5 3 12401.2 609.149 6
 -4 5 -4 154.869 134.227 5
 4 5 4 132 132.286 7
 4 5 4 122.46 172.879 6
 -4 5 -5 10944.8 561.932 5
 -4 -5 -5 10343.1 527.965 5
 4 5 5 10645.7 563.685 7
 4 5 5 11348.6 584.53 6
 -4 5 -6 57.2692 150.91 5
 -4 -5 -6 195.299 133.456 5
 4 5 6 -183.175 180.622 7
 4 5 6 41.131 191.228 6
 -4 5 -7 10976.1 564.065 5
 -4 -5 -7 10307.6 551.16 5
 4 5 7 9786.95 569.078 7
 4 5 7 9518.19 585.133 6
 -4 5 -8 333.046 152.028 5
 -4 -5 -8 204.897 149.654 5
 4 5 8 550.765 203.934 7
 -4 5 -9 6289.31 402.226 5
 -4 -5 -9 5921.78 416.779 5
 4 5 9 7270.49 485.034 7
 -4 5 -10 2607.61 249.051 5
 -4 -5 -10 3280.91 297.688 5
 4 5 10 3297.62 340.64 7
 -4 -5 -11 6263.89 397.684 5
 4 5 11 5957.46 421.288 7
 -4 -5 -12 217.278 126.611 5
 4 5 12 185.754 162.507 7
 -4 -5 -13 2813.62 206.747 5
 4 5 13 3101.52 238.895 7
 -4 6 16 671.666 122.693 3
 -4 6 16 747.962 124.499 7
 -4 6 15 -13.4855 127.855 3
 -4 6 15 89.3074 137.718 7
 -4 6 14 83.3872 149.602 3
 -4 6 14 -74.2026 154.471 7
 -4 6 13 1391.1 228.128 3
 -4 6 13 1114.01 238.09 7
 -4 6 12 636.987 204.044 3
 -4 6 11 1107.28 232.347 3
 -4 6 10 514.232 184.293 3
 -4 6 9 888.112 201.169 3
 -4 6 9 398.604 211.416 7
 -4 6 8 819.156 193.119 3
 -4 6 8 938.893 229.265 7
 -4 6 7 730.399 178.705 3
 -4 6 7 748.907 207.143 4
 -4 6 7 785.455 161.801 6
 -4 6 6 1427.18 214.023 4
 -4 6 6 1219.1 188.21 3
 -4 6 6 1432.77 192.729 6
 -4 6 5 665.802 167.517 4
 -4 6 5 535.912 141.096 3
 -4 6 5 589.417 157.725 6
 -4 6 4 3136.4 275.923 4
 -4 6 4 2879.16 234.491 3
 -4 6 4 2980.48 265.202 6
 -4 6 3 753.027 165.68 4
 -4 6 3 595.494 137.008 3
 -4 6 3 718.464 176.904 6
 -4 6 2 3886.53 297.55 4
 4 6 -2 3833.03 270.929 6
 -4 6 2 4096.6 318.608 6
 -4 6 2 3578.33 253.652 3
 -4 6 1 1967.38 235.134 6
 -4 6 1 1853.67 217.084 4
 4 6 -1 1517.52 198.123 6
 -4 6 0 25099.5 1005.77 4
 4 6 0 24437.6 995.816 6
 4 6 1 740.438 184.222 6
 4 6 2 9502.06 513.58 6
 4 6 3 400.319 126.175 7
 4 6 3 163.666 183.849 6
 4 6 4 3753.39 293.232 7
 4 6 4 3816.04 333.499 6
 4 6 5 2539.99 261.079 7
 4 6 5 1836.76 270.138 6
 -4 6 -6 1413.55 193.941 5
 4 6 6 1678.91 243.056 7
 4 6 6 1366.2 283.606 6
 -4 6 -7 1091.05 174.47 5
 -4 -6 -7 906.15 173.775 5
 4 6 7 1405.48 231.469 7
 4 6 7 829.265 266.949 6
 -4 6 -8 1684.95 200.583 5
 -4 -6 -8 2141.61 223.596 5
 4 6 8 1949.65 274.477 7
 -4 -6 -9 204.223 134.75 5
 4 6 9 296.501 190.133 7
 -4 -6 -10 4922.65 329.755 5
 4 6 10 5706.96 388.588 7
 -4 -6 -11 -25.6583 101.415 5
 4 6 11 50.6729 146.602 7
 -4 -6 -12 3860.89 237.528 5
 4 6 12 5122.5 308.412 7
 4 6 13 203.472 91.6051 7
 -4 7 15 316.503 104.838 3
 -4 7 15 639.076 131.132 7
 -4 7 14 1808.74 191.95 3
 -4 7 13 -75.1967 141.923 3
 -4 7 12 3916.34 306.437 3
 -4 7 11 294.479 161.989 3
 -4 7 11 503.34 220.311 7
 -4 7 10 2532.72 270.923 3
 -4 7 10 2532.56 322.743 7
 -4 7 9 259.324 148.746 3
 -4 7 9 402.076 223.38 7
 -4 7 8 143.192 139.682 3
 -4 7 8 300.947 203.291 7
 -4 7 8 191.547 140.247 6
 -4 7 7 1459.5 203.635 3
 -4 7 7 1605.79 248.392 7
 -4 7 7 1579.26 220.62 6
 -4 7 6 6345.22 418.922 4
 -4 7 6 6230.21 409.103 6
 -4 7 6 6603.71 387.962 3
 -4 7 5 1267.17 206.351 4
 -4 7 5 638.605 148.086 3
 -4 7 5 892.907 203.548 6
 -4 7 4 6958.2 419.696 4
 -4 7 4 6314.18 427.454 6
 -4 7 3 2230.75 239.534 4
 4 7 -3 1900.81 205.068 6
 -4 7 3 1498.69 241.076 6
 -4 7 2 9032.63 480.935 4
 4 7 -2 8922.93 471.583 6
 -4 7 2 8677.62 518.307 6
 -4 7 1 4123.22 302.869 4
 4 7 -1 3858.91 303.386 6
 -4 7 1 4147.34 365.287 6
 -4 7 0 3329.5 268.249 4
 4 7 0 2847.83 282.612 6
 -4 7 0 2766.21 321.663 6
 -4 7 -1 8087.54 442.452 4
 4 7 1 8090.76 482.108 6
 -4 7 -1 8188.23 518.666 6
 -4 7 -2 1215.07 183.019 4
 4 7 2 1371.34 242.594 6
 4 7 3 5097.33 386.83 6
 4 7 4 83.8886 207.194 6
 4 7 5 2480.46 244.046 7
 4 7 5 2637.78 311.252 6
 4 7 6 618 164.875 7
 4 7 6 746.909 229.164 6
 4 7 7 3205.47 293.186 7
 4 7 7 3674.55 361.828 6
 4 7 8 999.862 211.254 7
 4 7 9 6768.26 414.972 7
 4 7 10 1309.36 196.435 7
 -4 7 -11 1518.18 184.02 6
 4 7 11 1785.63 184.288 7
 4 7 12 470.597 100.585 7
 -4 7 -12 704.276 101.803 6
 -4 8 14 720.949 136.324 7
 -4 8 13 4036.49 291.624 7
 -4 8 13 3499.47 225.902 3
 -4 8 12 117.066 112.111 3
 -4 8 12 139.551 157.36 7
 -4 8 11 2926.15 301.376 7
 -4 8 11 2889.89 237.779 3
 -4 8 10 2151.57 215.551 3
 -4 8 10 1868.78 271.2 7
 -4 8 9 3096.83 256.724 3
 -4 8 9 3685.1 342.019 7
 -4 8 8 44.4579 180.505 7
 -4 8 8 241.651 137.669 3
 -4 8 8 16.2509 133.684 6
 -4 8 7 8722.92 499.891 6
 -4 8 7 9717.68 557.037 7
 -4 8 6 1322.56 228.622 7
 -4 8 6 1435.04 229.76 6
 -4 8 5 8977.92 514.629 6
 -4 8 5 7813.81 470.893 4
 -4 8 4 787.092 182.894 4
 -4 8 4 726.903 222.166 6
 -4 8 3 4399.84 313.222 4
 4 8 -3 4416.89 316.574 6
 -4 8 3 4186.07 369.988 6
 -4 8 2 -63.0447 126.301 4
 4 8 -2 -84.7889 152.934 6
 -4 8 2 22.0173 176.425 6
 -4 8 1 575.497 143.189 4
 4 8 -1 715.633 196.373 6
 -4 8 1 861.912 230.921 6
 4 8 0 169.06 168.623 6
 -4 8 0 233.318 200.291 6
 4 8 1 4349.63 363.088 6
 -4 8 -1 4430.01 391.733 6
 4 8 2 488.141 210.228 6
 -4 8 -2 561.627 258.145 6
 -4 8 -3 49.3728 235.187 6
 4 8 3 167.463 193.713 6
 4 8 4 21.2855 206.551 6
 4 8 5 360.864 230.18 6
 -4 8 -6 1554.2 306.241 6
 4 8 6 1310.26 260.82 6
 -4 8 -7 2518.63 313.162 6
 4 8 7 1984.86 216.758 7
 -4 8 -8 3638.16 332.884 6
 4 8 8 2956.67 241.572 7
 4 8 9 592.586 133.685 7
 -4 8 -9 1127.43 204.146 6
 4 8 10 1257.42 142.605 7
 -4 8 -10 1660.65 185.892 6
 -4 8 -11 -7.88675 80.9277 6
 -4 9 13 852.096 120.13 7
 -4 9 12 2223.91 202.624 7
 -4 9 11 695.9 158.425 7
 -4 9 10 6257.58 393.012 7
 -4 9 9 307.76 162.704 7
 -4 9 8 11172.3 578.434 7
 -4 9 8 10854.3 530.424 6
 -4 9 7 365.58 175.285 7
 -4 9 7 707.259 180.515 6
 -4 9 6 9360.26 517.175 7
 -4 9 6 9046.83 514.149 6
 -4 9 5 2382.35 255.158 7
 -4 9 5 2565.7 295.958 6
 -4 9 4 2117.73 235.696 7
 -4 9 4 3001.42 314.295 6
 -4 9 3 463.5 141.754 7
 4 9 -3 256.761 144.492 6
 -4 9 3 482.152 218.747 6
 4 9 -2 2772.69 265.418 6
 -4 9 2 2469.91 322.772 6
 4 9 -1 1145.58 210.477 6
 -4 9 1 1642.13 284.716 6
 4 9 0 9668.74 534.543 6
 -4 9 0 8926.4 577.831 6
 4 9 1 2339.6 279.367 6
 -4 9 -1 2189.18 306.894 6
 4 9 2 9860.7 558.901 6
 -4 9 -2 9753.94 598.627 6
 4 9 3 1217.95 248.548 6
 -4 9 -3 704.317 272.332 6
 4 9 4 393.836 199.994 6
 4 9 5 -18.9926 184.301 6
 4 9 6 608.695 207.149 6
 -4 9 -6 593.509 215.917 6
 4 9 7 703.025 197.518 6
 -4 9 -7 766.871 205.37 6
 4 9 8 198.596 148.528 6
 -4 9 -8 14.5279 146.052 6
 -4 9 -9 44.3917 107.701 6
 -4 10 11 2817.25 187.698 7
 -4 10 10 -31.2884 90.0106 7
 -4 10 9 1888.1 185.381 7
 -4 10 8 419.557 134.684 7
 -4 10 7 2241.91 213.014 7
 -4 10 7 2690.34 232.488 6
 -4 10 6 634.25 140.068 7
 -4 10 6 612.747 170.745 6
 -4 10 5 1170.1 214.099 6
 -4 10 4 340.185 189.463 6
 4 10 -3 289.343 140.64 6
 -4 10 3 418.896 203.298 6
 4 10 -2 257.081 144.502 6
 -4 10 2 577.326 223.58 6
 4 10 -1 48.2671 142.013 6
 -4 10 1 63.1707 200.589 6
 4 10 0 1894.05 236.48 6
 -4 10 0 2318.2 305.798 6
 4 10 1 136.896 163.905 6
 -4 10 -1 316.589 212.228 6
 4 10 2 805.351 192.997 6
 -4 10 -2 1360.05 263.426 6
 4 10 3 1880.78 247.891 6
 4 10 4 1750.06 236.627 6
 4 10 5 359.362 159.902 6
 -4 10 -5 16.7772 174.363 6
 4 10 6 2599.54 241.3 6
 -4 10 -6 2981.52 261.044 6
 4 10 7 115.993 130.314 6
 -4 10 -7 347.862 144.455 6
 -4 10 -8 1311.78 141.842 6
 -4 11 6 74.7085 108.197 6
 -4 11 5 203.166 139.165 6
 -4 11 4 369.714 151.635 6
 -4 11 3 1059.48 187.884 6
 -4 11 2 338.684 167.859 6
 4 11 -1 1453.48 172.862 6
 -4 11 1 2460.61 254.74 6
 4 11 0 -12.2806 124.481 6
 -4 11 0 198.053 174.117 6
 4 11 1 612.445 150.878 6
 -4 11 -1 677.147 189.238 6
 4 11 2 86.2924 129.548 6
 -4 11 -2 -30.7715 148.624 6
 4 11 3 236.268 131.839 6
 4 11 4 175.122 115.602 6
 4 11 5 3562.89 231.292 6
 -4 11 -5 3508.96 245.48 6
 4 11 6 119.134 80.9618 6
 -4 11 -6 170.246 93.6318 6
 -4 12 4 488.955 102.353 6
 -4 12 3 82.2351 101.13 6
 -4 12 2 932.002 137.59 6
 -4 12 1 153.916 110.421 6
 -4 12 0 440.27 123.984 6
 -4 12 -1 137.442 105.631 6
 -4 12 -2 35.96 94.1114 6
 -5 0 17 10.9418 105.694 3
 -5 0 16 15.063 130.737 3
 -5 0 15 307.782 169.473 3
 -5 0 14 1983.1 256.483 3
 -5 0 13 40.3548 156.197 3
 -5 0 12 2244.79 253.749 3
 -5 0 11 201.568 159.178 3
 -5 0 10 11754.1 583.449 3
 -5 0 9 122.81 128.678 3
 5 0 -8 22333.2 886.262 2
 -5 0 8 21630.6 888.162 3
 -5 0 8 21777.9 874.657 4
 5 0 -7 -48.4862 80.8763 2
 -5 0 7 -33.7624 108.712 4
 -5 0 7 64.358 112.352 3
 5 0 -6 27120.7 943.872 1
 -5 0 6 28087.9 1036.38 4
 -5 0 6 28526.9 1057.79 3
 -5 0 5 39.9491 90.0644 4
 5 0 -5 21.9822 51.8528 1
 -5 0 5 -11.4579 114.668 3
 -5 0 5 -38.8467 75.7125 2
 -5 0 4 47310.4 1656.22 2
 5 0 -4 48861.8 1632.12 1
 -5 0 4 44632.4 1677.77 3
 -5 0 3 -43.0187 71.6499 2
 -5 0 3 -11.0899 106.141 3
 5 0 -3 -23.8916 74.7869 1
 -5 0 2 180.603 85.0944 2
 5 0 -2 117.053 82.6105 1
 -5 0 1 131.629 89.7133 2
 5 0 -1 113.25 103.759 7
 5 0 -1 -10.0859 93.3505 1
 -5 0 0 28512 1090.01 5
 5 0 0 27028.5 1079.99 1
 5 0 0 29551.9 1100.57 7
 -5 0 0 30587.2 1069.87 2
 5 0 1 77.6259 112.309 7
 -5 0 -1 62.8632 100.761 5
 5 0 1 49.7066 106.642 1
 -5 0 -2 8207.67 428.547 5
 5 0 2 7789.69 425.388 7
 5 0 2 8267.87 427.112 1
 -5 0 -3 30.5653 127.262 5
 -5 0 -4 52638 1938.18 5
 -5 0 -5 18.8744 158.147 5
 5 0 5 112.673 167.567 7
 -5 0 -6 54229.6 2056.22 5
 5 0 6 55131.8 2051.14 7
 -5 0 -7 68.148 197.165 5
 5 0 7 22.2492 195.295 7
 5 0 8 141.041 194.583 7
 5 0 9 -119.993 207.142 7
 5 0 10 18678.5 892.074 7
 5 0 11 -21.2005 172.123 7
 -5 0 -12 17305.5 789.456 5
 5 0 12 16208.6 754.86 7
 -5 0 -13 46.0168 129.297 5
 5 0 13 13.0599 115.902 7
 -5 0 -14 5604.59 304.41 5
 -5 1 17 390.837 142.956 3
 -5 1 16 549.409 168.986 3
 -5 -1 15 466.645 154.491 3
 -5 1 15 529.648 191.887 3
 -5 1 14 2626.07 294.894 3
 -5 -1 14 2156.31 239.512 3
 -5 -1 13 1478.63 218.319 3
 -5 1 13 1466.05 236.089 3
 -5 1 13 1259.28 185.731 7
 -5 1 12 4463.46 317.597 7
 -5 -1 12 4174.17 322.028 3
 -5 1 12 3957.42 348.9 3
 -5 1 11 7033.94 410.707 7
 -5 -1 11 6380.96 399.174 3
 -5 1 11 6714.97 435.236 3
 -5 1 10 8056.27 437.477 7
 -5 -1 10 7403.26 420.566 3
 -5 1 10 7421.03 452.031 3
 -5 1 9 3792.84 299.996 4
 -5 -1 9 4502.06 294.858 3
 -5 1 9 3924.14 308.484 3
 -5 1 8 125.398 128.438 4
 -5 -1 8 178.941 117.257 3
 -5 1 8 241.486 136.982 3
 5 -1 -8 238.045 86.9994 2
 -5 1 7 11322.5 534.906 4
 5 -1 -7 11282.7 503.274 2
 -5 -1 7 11901.4 524.816 3
 -5 1 7 11728.9 549.472 3
 5 1 -7 11721.2 535.162 2
 -5 -1 6 5318.51 299.079 2
 -5 1 6 4851.65 303.189 4
 5 -1 -6 5216.6 242.39 1
 -5 -1 6 4982.87 290.424 3
 -5 1 6 4851.06 313.951 3
 5 -1 -5 17220.4 625.292 1
 -5 -1 5 15840.6 660.136 2
 -5 1 5 14568.8 659.758 4
 5 1 -5 16880.4 581.9 1
 -5 -1 5 15254.2 651.12 3
 -5 1 5 14845.4 668.667 3
 -5 -1 4 1713.68 157.993 2
 -5 1 4 1758.1 186.564 3
 5 -1 -4 1725.07 149.176 1
 5 1 -4 1745.06 126.217 1
 -5 1 4 1725.76 135.426 2
 -5 1 4 1956.3 184.732 4
 -5 1 3 26272.6 1056.72 3
 5 1 -3 28274.7 1010.12 1
 -5 1 3 28339.9 1002.47 2
 -5 -1 3 27836.3 1040.55 2
 5 -1 -3 28441.1 1034.66 1
 -5 1 2 6101.13 326.666 5
 -5 1 2 5645.1 329.982 3
 5 1 -2 6213.17 304.77 1
 5 -1 -2 5962.64 314.405 1
 -5 1 2 5728.73 273.637 2
 -5 -1 2 5634.57 304.404 2
 -5 1 1 41087 1511.31 5
 5 1 -1 42169.5 1494.44 1
 5 -1 -1 43356.7 1524.63 7
 5 -1 -1 39336.4 1500.11 1
 -5 1 1 41815.1 1455.5 2
 -5 -1 1 42734.3 1497.82 2
 -5 1 0 3324.69 248.467 5
 5 1 0 3929.34 250.303 1
 5 -1 0 3130.52 244.741 1
 5 1 0 3885.42 252.517 7
 5 -1 0 3563.96 256.006 7
 -5 1 0 3800.77 210.759 2
 -5 -1 0 3773.57 234.061 2
 -5 1 -1 10968.2 517.873 5
 -5 -1 -1 11014.7 499.202 5
 5 1 1 10458.5 505.105 1
 5 -1 1 10658 511.441 1
 5 1 1 11013.2 506.317 7
 5 1 2 1098.45 164.031 7
 -5 1 -2 1352.27 182.863 5
 5 1 2 1338.27 172.816 1
 -5 -1 -2 1140.63 160.245 5
 -5 1 -3 31044.2 1232 5
 -5 -1 -3 31169.6 1218.78 5
 5 1 3 31898.8 1229.13 7
 5 -1 3 32717.1 1237.7 7
 5 -1 4 2369.5 243.916 7
 -5 -1 -4 2642.95 248.229 5
 5 1 4 2552.94 248.049 7
 -5 -1 -5 25767.6 1071.18 5
 5 -1 5 27024.2 1079.55 7
 5 1 5 24160.8 1065.24 7
 -5 -1 -6 618.434 201.754 5
 5 -1 6 492.697 196.385 7
 -5 -1 -7 9349.44 553.474 5
 5 -1 7 9063.67 546.003 7
 -5 -1 -8 144.089 196.249 5
 5 -1 8 138.423 184.873 7
 5 1 8 -71.8718 199.508 7
 -5 1 -8 96.9458 164.802 5
 -5 1 -9 4629.99 414.509 5
 -5 -1 -9 4850.13 413.678 5
 5 -1 9 4789.46 396.436 7
 5 1 9 4889.74 421.131 7
 -5 1 -10 482.241 225.308 5
 -5 -1 -10 656.4 230.466 5
 5 -1 10 734.889 220.156 7
 5 1 10 928.383 266.146 7
 -5 1 -11 9054.65 547.368 5
 -5 -1 -11 9012.01 565.171 5
 5 1 11 9179.21 547.186 7
 5 -1 11 9491.08 528.046 7
 -5 1 -12 980.267 212.827 5
 5 -1 12 612.291 163.033 7
 5 1 12 717.014 185.553 7
 5 1 13 5783.5 349.015 7
 5 -1 13 5441.25 312.013 7
 -5 1 -14 314.016 95.0622 5
 5 1 14 575.529 103.375 7
 -5 2 18 559.195 103.19 3
 -5 2 17 2411.15 223.888 3
 -5 2 16 68.557 143.614 3
 -5 2 15 1474.87 242.025 3
 -5 2 15 1479.38 189.131 7
 -5 2 14 1369.27 252.515 3
 -5 2 14 1357.38 200.957 7
 -5 2 13 13475.9 676.806 7
 -5 2 13 14820.8 736.53 3
 -5 2 12 5040.48 367.15 7
 -5 -2 12 4899.53 327.911 3
 -5 2 12 5203.26 408.125 3
 -5 2 11 11283.7 581.185 7
 -5 -2 11 10470.7 519.602 3
 -5 2 11 10516.7 591.255 3
 -5 2 10 3752.46 302.563 7
 -5 2 10 3153.69 305.568 3
 -5 -2 10 3627.89 259.441 3
 -5 2 9 4633.23 338.17 4
 -5 -2 9 4453.06 285.674 3
 -5 2 9 4995.7 355.301 3
 -5 2 8 1760.24 220.593 4
 -5 -2 8 1943.21 177.933 3
 -5 2 8 1741.57 217.611 3
 -5 2 7 5483.81 352.091 4
 -5 2 7 6139.59 365.687 3
 -5 2 6 2632.63 231.138 4
 -5 -2 6 2100.76 194.661 2
 -5 -2 5 10676.7 501.809 2
 -5 2 5 10985.3 518.731 4
 -5 -2 4 537.141 117.29 2
 -5 2 4 610.189 143.242 4
 -5 2 3 4928.98 224.464 2
 -5 -2 3 4801.21 290.855 2
 5 2 -3 5447.27 259.622 1
 -5 2 2 8219.31 429.946 3
 -5 2 2 8713.15 342.931 2
 5 2 -2 9037.56 396.005 1
 -5 -2 2 8411.2 418.149 2
 -5 2 1 2130.67 201.011 5
 5 -2 -1 2212.49 201.233 1
 5 2 -1 2209.41 181.858 1
 -5 2 1 2332.88 135.853 2
 -5 -2 1 2520.06 200.124 2
 5 2 0 4625.57 278.023 7
 5 -2 0 4444.59 299.502 1
 5 2 0 4468 281.135 1
 -5 2 0 5085.48 228.364 2
 -5 -2 0 4285.14 280.227 2
 5 -2 1 175.951 124.495 1
 5 -2 1 446.713 141.889 7
 5 2 1 464.966 128.242 7
 5 2 1 639.481 124.591 6
 5 2 1 582.206 130.341 1
 -5 -2 -1 452.86 110.379 5
 -5 -2 -2 1167.38 158.617 5
 5 -2 2 1040.29 179.849 7
 5 2 2 1515.74 181.258 7
 5 2 2 1334.96 163.3 6
 5 2 2 921.888 160.151 1
 -5 2 -3 2042.09 228.526 5
 -5 -2 -3 1654.88 191.957 5
 5 -2 3 2065.39 226.714 7
 5 2 3 1987.65 220.633 7
 5 2 3 2088.92 215.551 6
 -5 2 -4 11973.1 607.657 5
 -5 -2 -4 12006.9 587.826 5
 5 2 4 12261 600.133 7
 5 2 4 11978.4 582.834 6
 5 -2 4 12700.9 610.296 7
 -5 -2 -5 386.676 164.351 5
 5 2 5 521.784 198.276 7
 5 -2 5 496.596 180.208 7
 -5 2 -5 855.483 204.075 5
 -5 2 -6 8928.03 537.958 5
 -5 -2 -6 9522.75 535.871 5
 5 2 6 9777.23 550.196 7
 5 -2 6 9102.05 532.319 7
 -5 2 -7 4656.82 387.111 5
 -5 -2 -7 3789.5 351.773 5
 5 -2 7 3444.69 336.129 7
 5 2 7 4117.8 369.599 7
 -5 2 -8 6785.22 479.413 5
 -5 -2 -8 6696.84 472.756 5
 5 -2 8 7291.47 475.696 7
 -5 2 -9 5983.67 454.232 5
 -5 -2 -9 6599.97 469.754 5
 5 -2 9 6632.57 447.032 7
 5 2 10 -166.519 208.836 7
 -5 -2 -10 353.123 204.361 5
 5 -2 10 123.458 168.181 7
 -5 2 -10 185.869 195.878 5
 -5 2 -11 2003.27 261.91 5
 5 2 11 2291.49 289.296 7
 5 -2 11 2124.17 238.863 7
 -5 -2 -11 1809.88 271.35 5
 -5 2 -12 242.235 155.228 5
 -5 -2 -12 -91.5907 166.076 5
 5 2 12 36.516 165.531 7
 5 -2 12 93.7265 111.52 7
 -5 2 -13 1666.57 184.527 5
 -5 -2 -13 1646.43 193.878 5
 5 2 13 1823.32 199.212 7
 -5 -2 -14 112.363 81.732 5
 5 2 14 -60.0391 74.0206 7
 -5 3 18 2674.1 178.354 3
 -5 3 17 100.428 126.21 3
 -5 3 16 3172.74 239.845 7
 -5 3 16 4175.6 313.262 3
 -5 3 15 338.205 193.68 3
 -5 3 15 566.699 154.999 7
 -5 3 14 8310.91 487.153 7
 -5 3 14 7778.07 515.736 3
 -5 3 13 343.257 214.061 3
 -5 3 13 277.982 176.125 7
 -5 3 12 11948.5 646.289 7
 -5 3 11 1264.02 228.872 7
 -5 3 10 7300.58 464.662 7
 -5 3 9 4559.59 356.374 4
 -5 3 8 5604.91 383.211 4
 -5 3 7 3281.01 288.21 4
 -5 3 7 3494.98 283.362 3
 -5 3 6 8174.67 445.028 4
 -5 3 6 8290.57 444.566 3
 -5 3 5 4452.31 310.612 4
 -5 -3 5 3775.86 270.47 2
 -5 3 5 4045.34 291.169 3
 -5 -3 4 11935.5 552.638 2
 -5 3 4 12101 562.13 3
 -5 3 3 82.2614 128.739 3
 -5 -3 3 -13.6849 89.5312 2
 -5 3 2 11720.6 538.881 3
 -5 -3 2 10754.7 519.115 2
 -5 -3 1 2332.89 195.18 1
 -5 -3 1 2374.73 203.303 2
 -5 3 1 2018.92 205.012 3
 -5 3 0 4743.93 306.75 5
 5 3 0 3873.49 252.541 7
 -5 -3 0 3739.67 271.491 1
 5 3 0 4018.7 248.135 6
 -5 -3 0 4464.16 285.437 2
 -5 -3 -1 1294.82 177.886 1
 -5 3 -1 1630 193.421 5
 5 3 1 1890.46 189.282 7
 5 3 1 1267.15 157.947 6
 -5 3 -2 544.255 150.101 5
 -5 -3 -2 470.289 115.717 5
 5 -3 2 762.502 164.99 7
 5 3 2 586.794 141.593 7
 5 3 2 935.977 163.91 6
 -5 -3 -3 2668.45 223.873 5
 -5 3 -3 2526.37 260.618 5
 5 -3 3 2102.29 248.303 7
 5 3 3 2870.31 251.261 7
 5 3 3 2639.73 240.043 6
 -5 3 -4 2303.32 259.03 5
 -5 -3 -4 2034.39 217.225 5
 5 -3 4 2601.83 258.081 7
 5 3 4 2610.07 257.179 7
 5 3 4 2169.85 239.778 6
 -5 3 -5 122.985 154.073 5
 -5 -3 -5 72.6367 138.55 5
 5 -3 5 -19.4192 158.683 7
 5 3 5 -118.791 182.263 7
 5 3 5 164.987 178.697 6
 -5 3 -6 1095.29 207.134 5
 -5 -3 -6 724.76 186.001 5
 5 3 6 779.496 216.215 7
 5 -3 6 634.037 193.593 7
 5 3 6 503.081 221.642 6
 -5 3 -7 1012.72 240.72 5
 -5 -3 -7 1220.4 226.525 5
 5 -3 7 1331.09 226.698 7
 5 3 7 1557.3 259.585 7
 -5 3 -8 3012.96 331.256 5
 -5 -3 -8 3159.1 324.51 5
 5 -3 8 3768.49 320.132 7
 5 3 8 3204.14 348.577 7
 -5 3 -9 647.304 217.484 5
 -5 -3 -9 253.892 195.009 5
 5 -3 9 445.351 182.076 7
 5 3 9 292.37 234.643 7
 -5 3 -10 6997.37 469.959 5
 -5 -3 -10 7872.13 496.329 5
 5 -3 10 7272.81 431.929 7
 -5 3 -11 317.922 165.059 5
 -5 -3 -11 -197.697 179.218 5
 -5 3 -12 784.782 158.053 5
 -5 -3 -12 622.856 165.8 5
 5 3 12 843.748 204.826 7
 -5 3 -13 129.357 94.3555 5
 -5 -3 -13 48.8545 107.813 5
 5 3 13 -38.4831 115.083 7
 -5 4 17 2004.49 191.751 3
 -5 4 16 -12.5627 107.79 7
 -5 4 15 2850.59 267.786 7
 -5 4 14 1348.57 218.426 7
 -5 4 13 4812.24 393.747 7
 -5 4 12 251.769 236.808 3
 -5 4 12 69.6522 201.567 7
 -5 4 11 6354.72 453.731 7
 -5 4 11 6392.6 457.115 3
 -5 4 10 300.209 203.46 3
 -5 4 10 201.542 195.631 7
 -5 4 9 965.629 223.245 3
 -5 4 8 10045.2 546.861 3
 -5 4 7 850.238 187.208 3
 -5 4 6 25732.2 1046.94 3
 -5 4 5 1096.65 190.894 4
 -5 4 5 1632.36 202.567 3
 -5 4 4 3825.54 302.387 4
 -5 4 4 3517.38 282.493 3
 -5 4 3 324.57 116.262 6
 -5 -4 3 552.694 105.51 1
 -5 4 3 214.06 149.626 4
 -5 4 3 423.57 146.766 3
 -5 -4 2 8848.98 427.073 1
 -5 4 2 8236.29 447.086 3
 -5 4 1 2935.05 249.197 3
 -5 -4 1 2514.82 222.75 1
 -5 4 0 15129 665.63 3
 5 4 0 14462 620.504 6
 -5 4 -1 7175.07 421.01 5
 5 4 1 7340.19 383.178 7
 5 4 1 6882.05 378.198 6
 -5 4 -2 19954.2 851.712 5
 5 4 2 19011.7 806.244 7
 5 4 2 18914.8 804.387 6
 -5 4 -3 149.535 150.948 5
 5 4 3 329.259 153.257 7
 5 4 3 206.004 151.131 6
 -5 -4 -4 2983.77 244.864 5
 5 4 4 2824.56 266.713 7
 5 4 4 3242.29 285.866 6
 -5 4 -5 691.412 188.263 5
 -5 -4 -5 580.81 154.371 5
 5 -4 5 757.547 195.664 7
 5 4 5 869.061 202.624 7
 5 4 5 582.849 206.156 6
 -5 4 -6 3416.75 313.316 5
 -5 -4 -6 2731.37 269.126 5
 5 -4 6 3005.34 291.114 7
 5 4 6 3021.97 307.313 7
 5 4 6 2856.35 312.773 6
 -5 4 -7 650.863 213.789 5
 -5 -4 -7 580.865 169.699 5
 5 -4 7 695.631 179.491 7
 5 4 7 788.494 212.341 7
 5 4 7 465.563 219.029 6
 -5 4 -8 378.712 195.809 5
 -5 -4 -8 192.711 160.057 5
 5 4 8 451.654 200.638 7
 -5 4 -9 84.5781 163.684 5
 -5 -4 -9 63.217 153.521 5
 5 4 9 -70.0694 207.278 7
 -5 4 -10 1151.7 200.415 5
 -5 -4 -10 862.439 198.135 5
 5 4 10 1064.89 235.124 7
 -5 4 -11 696.7 157.17 5
 -5 -4 -11 645.421 164.054 5
 5 4 11 701.202 199.608 7
 -5 4 -12 -88.1922 97.2997 5
 -5 -4 -12 93.9441 113.805 5
 -5 -4 -13 481.284 101.339 5
 -5 5 17 169.325 87.0485 3
 -5 5 16 1010.79 160.645 3
 -5 5 16 516.685 126.883 7
 -5 5 15 1546.28 219.478 3
 -5 5 15 1444.53 201.344 7
 -5 5 14 -76.8212 174.109 3
 -5 5 14 174.829 172.397 7
 -5 5 13 1524.86 268.514 3
 -5 5 13 1146.54 240.866 7
 -5 5 12 66.2423 186.124 3
 -5 5 12 -23.6309 213.103 7
 -5 5 11 241.025 213.037 7
 -5 5 11 445.039 195.65 3
 -5 5 10 -108.71 188.706 3
 -5 5 10 143.19 204.765 7
 -5 5 9 2336.1 286.605 3
 -5 5 8 473.401 196.858 4
 -5 5 8 607.453 193.53 3
 -5 5 7 7006.45 446.149 4
 -5 5 7 7156.45 435.283 3
 -5 5 6 1278.21 209.789 4
 -5 5 6 1904.78 230.001 3
 -5 5 5 4173.34 328.449 4
 -5 5 5 4470.94 324.148 3
 -5 5 4 569.224 173.913 4
 -5 5 4 396.793 152.529 3
 -5 5 4 361.454 134.688 6
 -5 5 3 7494.71 440.973 4
 -5 5 3 6792.89 397.824 6
 -5 5 3 7894.65 427.198 3
 -5 5 2 197.018 143.742 6
 -5 5 2 201.073 147.948 4
 -5 5 2 30.4892 125.433 3
 5 5 -1 38863.8 1419.45 6
 -5 5 1 38545.7 1457.61 3
 -5 5 0 4821.56 328.021 3
 5 5 0 4783.07 304.943 6
 -5 5 -1 50488.5 1826.41 3
 5 5 1 48773.6 1807.82 6
 -5 5 -2 4507 322.395 3
 5 5 2 4326.17 298.948 7
 5 5 2 4462.17 321.9 6
 -5 5 -3 32434.3 1295.3 5
 5 5 3 31569.7 1257.79 7
 5 5 3 32874.5 1279.68 6
 -5 5 -4 987.548 205.401 5
 5 5 4 741.483 177.212 7
 5 5 4 948.739 213.313 6
 -5 5 -5 16604 791.034 5
 5 5 5 16324.4 787.038 7
 5 5 5 17538.6 812.607 6
 -5 5 -6 42.3764 150.645 5
 -5 -5 -6 194.371 129.841 5
 5 5 6 281.216 180.184 7
 5 5 6 -21.7024 206.779 6
 -5 5 -7 7252.05 459.162 5
 -5 -5 -7 7683.14 445.974 5
 5 5 7 7586.97 489.398 7
 5 5 7 7438.93 505.278 6
 -5 5 -8 139.545 147.619 5
 -5 -5 -8 187.237 138.658 5
 5 5 8 22.4524 194.921 7
 -5 5 -9 2700.85 255.085 5
 -5 -5 -9 2354.77 247.429 5
 5 5 9 2701.91 290.782 7
 -5 5 -10 -59.3156 114.79 5
 -5 -5 -10 63.5146 122.035 5
 5 5 10 96.4825 174.014 7
 5 5 11 2014.97 231.394 7
 -5 -5 -11 1733 184.235 5
 -5 -5 -12 281.774 90.5045 5
 5 5 12 501.786 135.331 7
 5 5 13 691.887 99.6372 7
 -5 6 16 81.778 92.5204 3
 -5 6 16 92.3745 80.6796 7
 -5 6 15 115.756 124.838 3
 -5 6 15 54.9291 120.565 7
 -5 6 14 1092.26 194.683 3
 -5 6 14 1066.68 196.645 7
 -5 6 13 315.873 175.631 3
 -5 6 13 328.177 184.29 7
 -5 6 12 1027.79 227.052 3
 -5 6 12 1752.54 277.89 7
 -5 6 11 250.893 188.722 3
 -5 6 10 756.964 209.176 3
 -5 6 9 206.24 175.016 3
 -5 6 8 8456.64 528.674 4
 -5 6 8 8535.38 503.586 3
 -5 6 7 -20.7491 159.468 4
 -5 6 7 56.5532 143.827 3
 -5 6 6 3726.93 332.907 4
 -5 6 6 3931.29 318.084 3
 -5 6 5 1708.76 243.18 4
 -5 6 5 1898.87 215.438 3
 -5 6 5 1882.2 213.761 6
 -5 6 4 3910.59 323.01 4
 -5 6 4 3852.37 297.787 6
 -5 6 4 4265.94 308.662 3
 -5 6 3 3343.96 308.958 4
 -5 6 3 3004.77 259.28 3
 -5 6 3 3052.9 281.074 6
 -5 6 2 7941.13 472.602 4
 -5 6 2 8459.15 477.87 6
 -5 6 2 8097.85 441.812 3
 -5 6 1 2866.59 301.559 6
 5 6 -1 3235.7 255.78 6
 -5 6 1 3696.6 313.556 4
 -5 6 1 3377.47 267.308 3
 5 6 0 28918.1 1155.72 6
 -5 6 0 29909.6 1155.63 3
 -5 6 -1 200.556 129.316 3
 5 6 1 16.4464 150.689 6
 -5 6 -2 7940.87 435.616 3
 5 6 2 7840.46 461.822 6
 5 6 3 209.217 126.49 7
 5 6 3 132.841 181.723 6
 5 6 4 3813.06 304.157 7
 5 6 4 4313.33 363.087 6
 5 6 5 -19.3454 140.936 7
 5 6 5 -21.1672 194.862 6
 5 6 6 9063.71 529.974 7
 5 6 6 10021.1 579.918 6
 5 6 7 -20.5079 167.588 7
 5 6 7 217.264 221.127 6
 5 6 8 10318.8 562.244 7
 5 6 9 2867.06 278.952 7
 5 6 10 4727.71 329.812 7
 5 6 11 276.35 128.159 7
 -5 6 -12 2308.92 167.651 6
 5 6 12 1883.92 156.437 7
 -5 7 15 32.5529 78.288 3
 -5 7 15 147.619 102.347 7
 -5 7 14 1778.34 189.946 3
 -5 7 14 1984.53 216.549 7
 -5 7 13 375.695 148.174 3
 -5 7 12 682.644 170.906 3
 -5 7 11 252.574 166.294 3
 -5 7 11 267.226 226.794 7
 -5 7 10 2304.84 251.748 3
 -5 7 10 2008.16 297.681 7
 -5 7 9 2282.77 314.108 7
 -5 7 9 2347.4 252.409 3
 -5 7 8 1045.76 195.082 3
 -5 7 8 1254.15 251.341 7
 -5 7 7 4941.12 385.261 4
 -5 7 7 4348.9 334.345 3
 -5 7 6 2239.73 233.654 3
 -5 7 6 2045.8 261.928 4
 -5 7 6 1513.82 206.632 6
 -5 7 5 2345.72 271.087 4
 -5 7 5 2427.04 235.932 3
 -5 7 5 2067.01 237.596 6
 -5 7 4 3090.55 299.952 4
 -5 7 4 3773.71 280.549 3
 -5 7 4 3167.06 296.308 6
 -5 7 3 3641.66 323.068 4
 -5 7 3 4094.22 344.238 6
 -5 7 3 3831.48 280.168 3
 -5 7 2 4315.38 344.926 4
 5 7 -2 4190.22 293.675 6
 -5 7 2 3688.45 341.33 6
 -5 7 1 15355.3 736.841 4
 5 7 -1 16210.9 719.641 6
 -5 7 1 16185.8 785.533 6
 -5 7 0 3548.85 340.882 6
 5 7 0 3513.01 291.153 6
 -5 7 0 2996.8 287.978 4
 -5 7 -1 11379.2 592.517 4
 5 7 1 11585.2 597.549 6
 -5 7 -1 13040.4 678.165 6
 -5 7 -2 2714.78 266.474 4
 5 7 2 3521.49 310.476 6
 5 7 3 4896.59 381.036 6
 5 7 4 1543.77 262.494 6
 5 7 5 2038.25 215.733 7
 5 7 5 1760.54 288.709 6
 5 7 6 85.8481 143.897 7
 5 7 6 166.723 203.18 6
 5 7 7 1513.97 205.856 7
 5 7 7 2079.51 266.913 6
 5 7 8 46.8942 128.554 7
 5 7 9 2130.14 205.735 7
 -5 7 -10 385.64 147.836 6
 5 7 10 153.265 106.982 7
 -5 7 -11 623.838 118.567 6
 -5 8 13 2095.24 169.797 3
 -5 8 13 2264.83 222.44 7
 -5 8 12 377.59 163.798 7
 -5 8 12 189.56 116.094 3
 -5 8 11 3714.02 321.379 7
 -5 8 11 3238.52 251.478 3
 -5 8 10 57.8599 123.388 3
 -5 8 10 -102.528 177.974 7
 -5 8 9 2297.73 226.722 3
 -5 8 9 2199.25 289.537 7
 -5 8 8 260.581 133.127 3
 -5 8 8 -66.2106 181.559 7
 -5 8 7 6376.19 449.892 7
 -5 8 7 5718.07 353.746 3
 -5 8 6 1259.66 221.258 4
 -5 8 6 1266.71 197.024 6
 -5 8 5 683.801 183.851 4
 -5 8 5 614.089 179.343 6
 -5 8 4 1187.05 209.437 4
 -5 8 4 1399.97 227.322 6
 -5 8 3 451.537 166.927 4
 -5 8 3 457.201 205.828 6
 -5 8 2 3580.86 300.905 4
 5 8 -2 3310.81 272.515 6
 -5 8 2 4046.74 357.461 6
 -5 8 1 375.569 144.085 4
 5 8 -1 16.5513 151.775 6
 -5 8 1 315.094 215.527 6
 -5 8 0 926.613 170.996 4
 5 8 0 827.363 190.856 6
 -5 8 0 1021.47 251.323 6
 -5 8 -1 4755.8 325.886 4
 5 8 1 4360.92 349.072 6
 -5 8 -1 5535.69 437.504 6
 5 8 2 76.5641 179.733 6
 -5 8 -2 -168.453 227.061 6
 -5 8 -3 48.0731 247.645 6
 5 8 3 19.525 176.078 6
 -5 8 -4 235.777 247.298 6
 5 8 4 667.149 216.903 6
 5 8 5 1585.19 258.166 6
 5 8 6 110.944 174.505 6
 5 8 7 1256.31 220.351 6
 -5 8 -8 1670.56 229.48 6
 -5 8 -9 406.404 147.826 6
 -5 8 -10 -8.75039 84.9122 6
 -5 9 13 8.27028 68.8668 7
 -5 9 12 2705.01 210.497 7
 -5 9 11 755.819 158.678 7
 -5 9 10 1759.94 214.445 7
 -5 9 9 189.917 159.06 7
 -5 9 8 5418.64 376.107 7
 -5 9 7 112.153 163.195 7
 -5 9 6 8902.08 496.311 7
 -5 9 6 8165.51 455.966 6
 -5 9 5 221.396 159.476 7
 -5 9 5 334.849 160.02 6
 -5 9 4 3703.81 297.149 7
 -5 9 4 3053.33 264.27 4
 -5 9 4 3450.6 313.376 6
 -5 9 3 475.357 141.669 4
 -5 9 3 463.478 190.754 6
 5 9 -2 606.051 150.693 6
 -5 9 2 695.62 214.645 6
 5 9 -1 719.233 167.634 6
 -5 9 1 585.745 217.282 6
 5 9 0 99.244 136.069 6
 -5 9 0 132.549 203.401 6
 5 9 1 85.7388 154.637 6
 -5 9 -1 -111.207 204.75 6
 5 9 2 17.4054 168.161 6
 -5 9 -2 242.576 217.872 6
 5 9 3 4805.42 353.35 6
 -5 9 -3 4892.09 403.525 6
 5 9 4 2081.92 243.57 6
 -5 9 -4 1712.19 268.013 6
 5 9 5 2076.06 243.599 6
 5 9 6 898.011 183.052 6
 5 9 7 -38.364 134.902 6
 -5 9 -7 42.4446 149.251 6
 -5 9 -8 277.454 120.088 6
 -5 9 -9 200.908 80.2591 6
 -5 10 10 836.64 121.345 7
 -5 10 9 1290.01 153.822 7
 -5 10 8 868.272 143.508 7
 -5 10 7 995.867 156.066 7
 -5 10 6 64.8287 108.664 7
 -5 10 6 109.794 121.597 6
 -5 10 5 901.847 145.009 7
 -5 10 5 900.646 170.894 6
 -5 10 4 2995.23 268.528 6
 -5 10 3 343.747 175.281 6
 -5 10 2 3903.91 322.511 6
 5 10 -1 249.377 124.534 6
 -5 10 1 277.275 189.863 6
 5 10 0 2655.89 235.994 6
 -5 10 0 3530.48 319.988 6
 5 10 1 68.4209 136.431 6
 -5 10 -1 276.701 201.267 6
 5 10 2 809.128 165.023 6
 -5 10 -2 766.751 209.631 6
 5 10 3 -13.385 138.527 6
 -5 10 -3 403.597 179.488 6
 5 10 4 2718.47 239.616 6
 -5 10 -4 3510.59 283.218 6
 5 10 5 538.306 142.463 6
 5 10 6 1337.4 153.621 6
 -5 10 -7 34.0268 91.4542 6
 -5 11 5 1154.45 134.953 6
 -5 11 4 -64.5552 112.643 6
 -5 11 3 2982.83 237.451 6
 -5 11 2 -103.103 124.537 6
 -5 11 1 3584.11 272.26 6
 -5 11 0 79.9979 137.944 6
 5 11 1 1272.8 138.481 6
 -5 11 -1 1965.42 204.481 6
 5 11 2 58.3872 90.002 6
 -5 11 -2 -36.4766 124.767 6
 5 11 3 297.414 92.7254 6
 -5 11 -3 340.883 131.08 6
 -5 11 -4 37.7003 93.9281 6
 -6 0 16 1693.89 189.739 3
 -6 0 15 -33.5535 137.968 3
 -6 0 14 3470.97 306.248 3
 -6 0 13 138.598 176.72 3
 -6 0 12 6206.25 417.355 3
 -6 0 11 -95.9781 136.454 3
 -6 0 10 5605.47 380.901 3
 -6 0 9 -58.448 131.075 4
 -6 0 9 67.944 137.007 3
 -6 0 8 34319.2 1325.1 4
 -6 0 8 36501.4 1360.64 3
 -6 0 7 38.7471 113.388 4
 -6 0 7 105.922 126.797 3
 -6 0 6 30297.6 1135.8 2
 -6 0 6 30637.5 1147.33 4
 -6 0 6 29294.1 1164.6 3
 -6 0 5 -12.2081 109.515 4
 -6 0 5 70.4993 124.449 3
 -6 0 5 34.8759 73.7453 2
 -6 0 4 22579.1 863.13 2
 6 0 -4 22559.3 845.949 1
 -6 0 4 21334.7 899.162 3
 -6 0 3 10.7848 71.2614 2
 -6 0 3 -14.0671 122.094 3
 6 0 -3 -42.5566 81.7681 1
 -6 0 2 23340.1 941.447 5
 -6 0 2 25128.5 921.724 2
 6 0 -2 23083.5 926.204 1
 -6 0 1 -41.1052 110.525 5
 -6 0 1 -33.9627 78.3952 2
 6 0 -1 -101.881 124.886 7
 6 0 -1 -26.2643 115.275 1
 6 0 0 899.145 162.795 1
 -6 0 0 1110.18 172.074 5
 -6 0 0 1285.42 142.122 2
 6 0 0 1058.99 173.583 7
 -6 0 -1 -15.7086 118.074 5
 -6 0 -1 -12.7892 77.5926 2
 6 0 1 81.79 137.884 7
 -6 0 -2 23929.4 980.745 5
 6 0 2 22810.4 974.489 7
 -6 0 -3 -92.8999 161.266 5
 6 0 3 38.0663 145.219 7
 -6 0 -4 22634.4 988.582 5
 -6 0 -5 109.289 182.044 5
 -6 0 -6 24035.6 1046.21 5
 6 0 6 22279.4 1040.92 7
 -6 0 -7 122.159 194.488 5
 6 0 7 97.5224 217.566 7
 6 0 8 3501.23 364.541 7
 -6 0 -8 3862.61 375.969 5
 6 0 9 -23.4971 199.252 7
 6 0 10 2381.17 294.115 7
 6 0 11 -107.009 153.065 7
 6 0 12 1751.13 197.437 7
 -6 0 -13 10.1995 87.0028 5
 6 0 13 -15.9717 68.52 7
 -6 1 17 65.9237 104.684 3
 -6 1 16 30.344 136.101 3
 -6 -1 15 1941.84 203.392 3
 -6 1 15 1693.9 245.356 3
 -6 -1 14 1230.52 188.958 3
 -6 1 14 1003.21 220.762 3
 -6 1 13 3798.77 344.206 3
 -6 -1 13 3434.38 288.388 3
 -6 -1 12 853.516 176.439 3
 -6 1 12 1066.64 223.12 3
 -6 1 12 1135.61 176.764 7
 -6 1 11 5455.37 361.23 7
 -6 -1 11 5774.76 373.008 3
 -6 1 11 5357.1 398.629 3
 -6 -1 10 2302.22 241.4 3
 -6 1 10 2211.63 268.945 3
 -6 1 9 12216.2 604.385 4
 -6 -1 9 12844.4 595.4 3
 -6 1 9 11944.7 617.318 3
 -6 1 8 62.2047 136.527 4
 -6 -1 8 87.1652 116.437 3
 -6 1 8 120.329 162.996 3
 -6 1 7 38210.6 1443.61 4
 -6 -1 7 38509 1426.96 3
 -6 1 7 38158.3 1462.89 3
 -6 1 6 -14.1236 113.169 4
 -6 -1 6 26.6265 115.551 3
 -6 1 6 46.7933 136.909 3
 -6 1 5 73490.6 2483.38 2
 -6 -1 5 73839.2 2534.44 2
 -6 1 5 69973.4 2534.01 4
 -6 -1 5 72137.9 2527.13 3
 -6 1 5 71272 2554.08 3
 -6 -1 4 1017.47 139.614 2
 -6 1 4 942.316 176.867 3
 -6 -1 4 1020.06 156.031 3
 6 1 -4 891.871 106.269 1
 6 -1 -4 1420.76 141.008 1
 -6 -1 4 1217.78 140.501 4
 -6 1 4 1065.44 115.248 2
 -6 1 3 57660.9 2088.93 3
 -6 -1 3 58230.2 2066.41 3
 6 1 -3 58778.6 2028.06 1
 -6 1 3 57494.5 2007.6 2
 6 -1 -3 57739.5 2046.61 1
 -6 -1 3 58633.4 2058.72 2
 -6 1 2 80.6473 67.9748 2
 -6 -1 2 129.245 98.5179 5
 -6 -1 2 153.141 90.0072 2
 -6 1 2 151.145 134.188 3
 6 -1 -2 -25.4325 95.6618 1
 6 1 -2 150.452 93.4302 1
 6 1 -2 324.616 118.385 7
 -6 1 1 3095.19 262.898 5
 -6 -1 1 3456.88 246.064 5
 6 1 -1 3030.27 238.691 1
 6 -1 -1 3090.78 262.522 7
 6 1 -1 3555.73 259.981 7
 6 -1 -1 3357.66 255.366 1
 -6 1 1 3619.06 213.887 2
 -6 -1 1 3574.88 243.718 2
 -6 1 0 8795.07 463.206 5
 -6 -1 0 8903.69 442.244 5
 6 -1 0 8425.9 465.462 7
 6 1 0 8969.13 455.041 7
 6 -1 0 8334.27 452.412 1
 -6 1 0 8722.26 397.675 2
 -6 -1 0 8527.46 431.722 2
 6 1 0 7989.12 440.384 1
 -6 1 -1 3610.39 290.381 5
 -6 -1 -1 3539.98 269.977 5
 6 -1 1 3771.54 308.232 7
 6 1 1 3271.66 272.145 7
 -6 1 -2 1537.55 216.08 5
 -6 -1 -2 1795.43 202.813 5
 6 1 2 1143.53 203.53 7
 -6 1 -3 10083 557.188 5
 -6 -1 -3 10745.2 551.827 5
 6 1 3 10461.2 554.559 7
 -6 1 -4 -20.8769 178.083 5
 -6 -1 -4 137.27 161.265 5
 6 1 4 61.4166 156.196 7
 6 -1 4 -83.365 176.731 7
 -6 1 -5 15794.5 827.627 5
 -6 -1 -5 18732.2 842.444 5
 6 -1 5 18353.4 852.835 7
 6 1 5 18544.6 851.37 7
 -6 -1 -6 2699.17 300.143 5
 6 -1 6 3016.95 332.623 7
 -6 -1 -7 23.9669 194.598 5
 6 -1 7 144.45 197.997 7
 -6 -1 -8 13701.6 723.563 5
 6 -1 8 13167.9 719.326 7
 -6 1 -9 2173.69 316.825 5
 -6 -1 -9 2517.01 310.043 5
 6 -1 9 2657.47 314.482 7
 6 1 9 2613.98 311.441 7
 -6 1 -10 4316.66 381.457 5
 -6 -1 -10 4939.71 388.517 5
 6 1 10 5131.06 394.441 7
 6 -1 10 5222.24 381.805 7
 -6 1 -11 2301.73 256.886 5
 -6 -1 -11 2309.17 259.337 5
 6 1 11 2477.64 272.203 7
 6 1 12 2195.39 215.788 7
 -6 1 -12 2342.85 225.023 5
 -6 -1 -12 2418.17 229.332 5
 6 -1 12 2122.92 193.434 7
 -6 1 -13 553.19 105.43 5
 -6 -1 -13 623.053 113.727 5
 6 1 13 419.514 101.235 7
 -6 2 17 81.3894 116.887 3
 -6 2 16 31.4933 138.218 3
 -6 2 15 1523.29 244.073 3
 -6 2 14 805.912 235.873 3
 -6 2 14 1311.86 183.537 7
 -6 2 13 4269.12 328.927 7
 -6 2 13 3985.5 368.539 3
 -6 2 12 3831 316.351 7
 -6 2 12 3744.2 357.809 3
 -6 2 11 7466.97 460.798 7
 -6 2 11 7727.84 494.029 3
 -6 -2 10 7553.21 405.075 3
 -6 2 10 6868.56 466.157 3
 -6 2 9 772.222 191.528 4
 -6 -2 9 685.493 138.471 3
 -6 2 9 626.347 193.828 3
 -6 2 8 2603.2 268.105 4
 -6 2 8 2923.2 278.176 3
 -6 -2 8 2707.64 222.793 3
 -6 2 7 1430.66 207.784 4
 -6 -2 7 1395.97 165.796 3
 -6 2 7 1523.84 209.662 3
 -6 2 6 10963.1 553.961 4
 -6 -2 6 11603.3 513.317 3
 -6 2 6 10950.9 563.78 3
 -6 2 5 353.893 168.783 4
 -6 -2 5 318.818 109.23 3
 6 -2 -4 8155.36 394.436 1
 -6 2 4 7611.39 415.751 4
 -6 -2 3 8027.63 413.284 3
 6 -2 -3 8831.06 441.36 1
 -6 -2 3 8316.79 432.961 2
 6 2 -3 8599.98 394.621 1
 -6 -2 2 1536.77 173.254 2
 6 -2 -2 1561.43 190.577 1
 -6 -2 2 1539.79 177.493 3
 6 2 -2 1574.59 168.362 7
 6 2 -2 1284.3 147.681 1
 6 2 -1 1981.31 187.752 1
 -6 2 1 1879.11 217.959 5
 6 2 -1 1947.53 195.612 7
 -6 2 0 4196.18 313.433 5
 -6 -2 0 4273.05 274.284 5
 6 2 0 4251.38 293.538 7
 -6 2 -1 3674.14 316.687 5
 -6 -2 -1 4437.86 290.088 5
 6 2 1 4251.83 304.309 7
 -6 -2 -2 8445.41 451.839 5
 6 -2 2 8663.06 493.289 7
 6 2 2 8484.6 473.83 7
 -6 -2 -3 120.809 132.73 5
 6 2 3 282.118 158.611 7
 6 -2 3 60.3155 162.24 7
 -6 -2 -4 5838.73 389.548 5
 6 2 4 6124.13 415.237 7
 6 -2 4 6039.33 422.189 7
 -6 -2 -5 4248.69 340.587 5
 -6 2 -5 3803.34 373.525 5
 6 2 5 4708.25 380.141 7
 6 -2 5 3804.1 366.542 7
 -6 2 -6 6605.21 469.091 5
 -6 -2 -6 5663.92 420.844 5
 6 2 6 6015.25 444.987 7
 6 -2 6 5599 421.64 7
 -6 2 -7 7481.94 507.15 5
 -6 -2 -7 7558.98 486.35 5
 6 -2 7 6869.11 482.123 7
 6 2 7 6383.94 481.457 7
 -6 2 -8 1219 260.884 5
 -6 -2 -8 1844.32 266.396 5
 6 -2 8 1035.53 242.965 7
 -6 2 -9 11394.7 638.924 5
 -6 -2 -9 11771.3 632.594 5
 6 -2 9 10976.9 613.641 7
 -6 2 -10 1544.7 241.444 5
 6 -2 10 1640.08 227.738 7
 -6 -2 -10 1627.07 243.706 5
 -6 2 -11 5424.76 370.33 5
 -6 -2 -11 5573.33 369.708 5
 6 2 11 5728.53 384.451 7
 6 -2 11 6291.29 357.839 7
 -6 2 -12 1837.85 188.553 5
 -6 -2 -12 1757.43 189.529 5
 6 2 12 1361.8 186.118 7
 -6 2 -13 497.705 88.7052 5
 -6 -2 -13 558.103 97.6501 5
 6 2 13 427.843 94.5435 7
 -6 3 17 122.845 113.729 3
 -6 3 16 1115.86 182.001 3
 -6 3 15 467.698 198.377 3
 -6 3 15 250.785 132.028 7
 -6 3 14 4108.86 313.938 7
 -6 3 14 3359.18 337.707 3
 -6 3 13 1418.05 269.665 3
 -6 3 13 1354.5 232.259 7
 -6 3 12 6100.53 433.812 7
 -6 3 12 6501.58 458.303 3
 -6 3 11 284.517 189.1 7
 -6 3 9 -201.197 175.737 4
 -6 3 8 420.819 173.04 4
 -6 3 7 946.441 202.325 4
 -6 3 6 227.556 150.312 4
 -6 3 6 142.748 155.865 3
 -6 3 5 971.85 204.566 4
 -6 3 5 1001.24 190.367 3
 -6 3 4 4279.83 322.974 4
 -6 3 4 3949.99 315.295 3
 -6 3 3 1313.26 200.43 3
 -6 3 2 1249.88 201.823 3
 -6 3 1 85.8454 160.439 3
 6 3 -1 -88.6023 108.612 7
 6 3 0 9850.49 481.067 7
 6 3 0 9430.81 451.156 6
 -6 3 -1 1739.2 229.335 5
 6 3 1 2109.5 218.959 7
 6 3 1 2108.34 202.782 6
 -6 3 -2 16195.1 757.111 5
 -6 -3 -2 15644.9 691.427 5
 6 -3 2 15058 744.962 7
 6 3 2 16410 728.755 7
 6 3 2 15769.4 699.094 6
 -6 3 -3 1622.66 238.083 5
 -6 -3 -3 1431 190.698 5
 6 -3 3 1139.96 223.891 7
 6 3 3 1755.34 234.69 7
 6 3 3 1503.64 215.697 6
 -6 3 -4 28812 1187.17 5
 -6 -3 -4 27206.6 1124.52 5
 6 -3 4 28391.5 1177.8 7
 6 3 4 26743.3 1149.71 7
 -6 3 -5 8715.68 546.453 5
 -6 -3 -5 8647.92 499.459 5
 6 -3 5 7723.17 514.239 7
 6 3 5 9308.53 539.106 7
 -6 3 -6 2779.68 324.15 5
 -6 -3 -6 3468.52 315.657 5
 6 -3 6 3082.3 323.192 7
 6 3 6 3731.7 357.213 7
 -6 3 -7 457.61 225.414 5
 -6 -3 -7 481.32 178.081 5
 6 -3 7 180.296 185.771 7
 6 3 7 478.633 209.276 7
 -6 3 -8 1142.99 246.813 5
 -6 -3 -8 1195.5 215.858 5
 6 -3 8 1192.24 224.884 7
 6 3 8 852.423 240.687 7
 -6 3 -9 107.736 183.81 5
 -6 -3 -9 164.156 161.104 5
 6 -3 9 -113.522 161.403 7
 6 3 9 223.699 212.09 7
 -6 3 -10 1776.15 233.938 5
 -6 -3 -10 1895.28 235.162 5
 6 3 10 1818.7 259.805 7
 -6 3 -11 983.071 172.337 5
 -6 -3 -11 613.664 154.423 5
 -6 3 -12 1402.79 149.647 5
 -6 -3 -12 1399.18 153.842 5
 -6 4 17 1152.94 140.186 3
 -6 4 16 1679.55 164.231 7
 -6 4 16 2296.37 220.592 3
 -6 4 15 2446.35 233.17 7
 -6 4 14 2471.86 263.012 7
 -6 4 13 1954.43 266.978 7
 -6 4 12 1614.05 267.918 7
 -6 4 11 275.724 214.746 3
 -6 4 11 23.3151 186.865 7
 -6 4 10 2772.12 318.137 3
 -6 4 9 173.143 193.131 4
 -6 4 9 21.5739 180.776 3
 -6 4 8 6065.21 433.913 4
 -6 4 8 6640.06 442.483 3
 -6 4 7 -177.011 176.521 3
 -6 4 6 7830.7 468.161 3
 -6 4 5 914.39 203.818 3
 -6 4 4 250.479 150.119 3
 -6 4 3 1183.78 200.085 3
 -6 4 3 1238.42 211.448 4
 -6 4 2 5387.11 367.056 3
 -6 4 1 17.9617 152.312 3
 -6 4 0 4298.57 328.809 3
 6 4 0 3277.62 251.914 6
 -6 4 -1 100.214 163.959 5
 -6 4 -1 227.275 153.96 3
 6 4 1 352.807 132.603 7
 6 4 1 214.619 135.222 6
 -6 4 -2 3964.83 335.465 5
 6 4 2 3746.78 297.571 6
 6 4 2 3702 295.377 7
 -6 4 -3 7817.95 491.7 5
 6 4 3 6664.4 432.423 7
 6 4 3 7857.27 453.41 6
 -6 -4 -4 3111.4 262.639 5
 -6 4 -4 2988.24 328.291 5
 6 4 4 3264.57 302.712 7
 6 4 4 3124.84 299.483 6
 -6 4 -5 1092.95 220.383 5
 6 4 5 741.023 202.844 7
 -6 -4 -5 933.678 176.923 5
 -6 4 -6 1053.93 228.1 5
 -6 -4 -6 1237.58 200.123 5
 6 4 6 999.267 238.64 7
 -6 4 -7 1236.36 236.256 5
 -6 -4 -7 1516.3 223.836 5
 6 4 7 1307.36 245.073 7
 -6 4 -8 687.428 203.32 5
 6 4 8 756.524 214.471 7
 -6 -4 -8 879.924 186.526 5
 -6 4 -9 3010.77 292.878 5
 6 4 9 3165.37 315.634 7
 -6 -4 -9 3021.97 274.714 5
 -6 4 -10 439.372 147.393 5
 -6 -4 -10 435.793 137.753 5
 6 4 10 537.746 184.54 7
 -6 -4 -11 2791.5 210.181 5
 6 4 11 3181.88 251.2 7
 6 4 12 482.32 112.64 7
 -6 5 16 170.671 116.774 3
 -6 5 16 18.9218 85.3484 7
 -6 5 15 2624.66 235.771 7
 -6 5 15 2837.54 254.906 3
 -6 5 14 416.325 188.622 3
 -6 5 14 515.557 162.731 7
 -6 5 13 4532.44 361.139 7
 -6 5 13 3743.59 338.64 3
 -6 5 12 281.732 204.788 3
 -6 5 12 410.108 211.097 7
 -6 5 11 1429.22 258.428 3
 -6 5 11 1837.36 290.08 7
 -6 5 10 470.578 211.978 3
 -6 5 10 459.93 244.789 7
 -6 5 9 13068.8 687.904 3
 -6 5 8 1480.02 251.34 3
 -6 5 7 11041.3 620.504 4
 -6 5 7 11183.8 600.691 3
 -6 5 6 -82.8238 181.744 4
 -6 5 6 58.9644 154.305 3
 -6 5 5 4914.17 401.09 4
 -6 5 5 5970.1 389.748 3
 -6 5 4 -39.7857 171.697 4
 -6 5 4 -111.62 135.559 3
 -6 5 3 14499.6 690.621 4
 -6 5 3 13446.1 625.405 6
 -6 5 3 13389.1 662.2 3
 -6 5 2 1266.51 200.006 6
 -6 5 2 1623.54 223.719 3
 -6 5 1 31713.6 1267.68 3
 -6 5 0 3728.32 316.132 3
 6 5 0 3558.7 268.925 6
 -6 5 -1 34229.3 1351.13 3
 6 5 1 34233.3 1315.1 6
 -6 5 -2 154.974 159.636 3
 6 5 2 409.89 141.866 7
 6 5 2 359.429 166.405 6
 -6 5 -3 8957.19 521.669 3
 6 5 3 9463.69 511.91 7
 6 5 3 10025.9 534.846 6
 -6 5 -4 1452.59 245.361 5
 -6 5 -4 1312.77 213.097 3
 6 5 4 1353.61 221 7
 6 5 4 1476.22 226.841 6
 -6 5 -5 7078.7 480.394 5
 6 5 5 7438.74 467.317 7
 6 5 5 7997.48 493.202 6
 -6 5 -6 7138.88 466.22 5
 6 5 6 6902.32 460.618 7
 -6 5 -7 1720.31 230.85 5
 -6 -5 -7 1885.56 208.131 5
 6 5 7 2078.08 266.942 7
 -6 5 -8 1100.27 196.1 5
 -6 5 -8 1125.62 178.693 3
 6 5 8 1110.95 217.229 7
 -6 -5 -8 771.831 149.022 5
 -6 -5 -9 356.124 118.657 5
 6 5 9 748.294 187.836 7
 6 5 10 462.32 150.01 7
 6 5 11 306.363 118.265 7
 -6 6 16 948.569 114.754 3
 -6 6 15 231.983 124.505 3
 -6 6 15 274.119 116.992 7
 -6 6 14 2237.55 222.469 3
 -6 6 14 1356.76 201.34 7
 -6 6 13 17.4447 160.605 3
 -6 6 13 114.048 179.359 7
 -6 6 12 3411.39 309.843 3
 -6 6 12 2952.68 314.734 7
 -6 6 11 266.918 192.033 3
 -6 6 11 231.826 220.983 7
 -6 6 10 6542.68 444.529 3
 -6 6 9 360.528 187.546 3
 -6 6 8 10567.5 639.298 4
 -6 6 8 12236.2 625.307 3
 -6 6 7 309.779 222.775 4
 -6 6 7 466.044 183.2 3
 -6 6 6 2079.57 284.803 4
 -6 6 6 2314.47 255.207 3
 -6 6 5 191.079 195.836 4
 -6 6 5 515.631 169.004 3
 -6 6 4 3160.3 324.103 4
 -6 6 4 2960.76 259.444 6
 -6 6 4 3044.88 288.59 3
 -6 6 3 1203.97 246.689 4
 -6 6 3 1573.29 213.899 3
 -6 6 3 1480.81 208.139 6
 -6 6 2 8580.43 533.665 4
 -6 6 2 9304.44 516.173 6
 -6 6 2 9125.97 500.556 3
 -6 6 1 7275.16 472.189 4
 -6 6 1 7565.54 468.759 6
 -6 6 1 7714.95 444.375 3
 6 6 0 8825.14 470.156 6
 -6 6 0 8860.98 492.066 3
 -6 6 -1 161.636 138.161 3
 6 6 1 216.588 148.779 6
 6 6 2 12697.1 630.856 6
 -6 6 -2 12557.1 620.131 3
 -6 6 -3 2238.33 236.329 3
 6 6 3 2242.38 268.895 6
 -6 6 -4 19543.8 841.995 3
 6 6 4 19476 846.947 7
 6 6 4 19584 885.934 6
 6 6 5 1616.21 207.269 7
 6 6 5 1226.36 242.385 6
 6 6 6 14806.3 713.39 7
 6 6 6 16147.5 754.46 6
 6 6 7 939.719 188.821 7
 6 6 8 3485.1 281.919 7
 6 6 9 568.41 144.031 7
 6 6 10 281.342 106.82 7
 -6 6 -11 302.276 94.7034 6
 -6 7 15 531.378 100.864 7
 -6 7 14 330.588 111.642 3
 -6 7 14 378.766 134.693 7
 -6 7 13 528.436 148.073 3
 -6 7 13 1068.89 192.214 7
 -6 7 12 356.834 155.037 3
 -6 7 11 3594.44 301.605 3
 -6 7 10 72.9597 155.781 3
 -6 7 10 628.586 238.763 7
 -6 7 9 5463.78 429.989 7
 -6 7 9 5549.72 385.113 3
 -6 7 8 43.42 201.219 4
 -6 7 8 664.945 180.513 3
 -6 7 7 1019.13 247.835 4
 -6 7 7 979.114 190.405 3
 -6 7 6 43.0059 191.867 4
 -6 7 6 -91.8349 140.142 3
 -6 7 5 1655.8 261.696 4
 -6 7 5 1464.79 215 3
 -6 7 4 -125.639 190.825 4
 -6 7 4 -17.3189 134.086 3
 -6 7 4 -87.2387 144.407 6
 -6 7 3 8083.02 489.845 4
 -6 7 3 7533.13 454.66 6
 -6 7 3 7170.98 428.355 3
 -6 7 2 491.911 191.893 4
 -6 7 2 263.555 135.125 3
 -6 7 2 440.558 181.925 6
 -6 7 1 24674.4 1038.21 4
 -6 7 1 22993.2 1036.62 6
 -6 7 1 23809.6 973.145 3
 -6 7 0 381.724 186.447 4
 6 7 0 429.443 160.51 6
 -6 7 0 553.463 212.372 6
 -6 7 -1 800.093 235.83 6
 -6 7 -1 652.254 190.727 4
 6 7 1 803.469 182.662 6
 -6 7 -2 328.009 171.54 4
 6 7 2 307.523 167.688 6
 -6 7 -3 408.116 163.531 4
 6 7 3 545.615 193.651 6
 6 7 4 325.248 185.113 6
 6 7 5 1077.14 232.63 6
 6 7 6 1762.64 243.39 6
 6 7 7 3425.86 247.103 7
 6 7 8 4145.01 256.143 7
 -6 7 -9 418.562 150.332 6
 6 7 9 364.361 92.7647 7
 -6 7 -10 2167.32 173.125 6
 -6 8 12 19.7542 91.8412 3
 -6 8 12 -14.7013 134.653 7
 -6 8 11 215.516 123.761 3
 -6 8 11 498.094 176.526 7
 -6 8 10 684.976 150.593 3
 -6 8 10 571.864 200.64 7
 -6 8 9 316.476 137.957 3
 -6 8 9 183.353 188.697 7
 -6 8 8 1494.21 189.554 3
 -6 8 8 1422.44 253.797 7
 -6 8 7 -15.0974 116.03 3
 -6 8 7 21.6131 175.471 7
 -6 8 6 351.765 178.396 4
 -6 8 6 314.355 128.133 3
 -6 8 5 77.7931 176.362 4
 -6 8 5 174.745 135.584 6
 -6 8 4 384.611 173.79 4
 -6 8 4 315.483 164.966 6
 -6 8 3 264.472 170.606 4
 -6 8 3 303.503 174.869 6
 -6 8 2 2736.05 279.467 4
 -6 8 2 3047.95 312.362 6
 -6 8 1 125.827 148.027 4
 -6 8 1 462.482 205.986 6
 -6 8 0 5695.55 376.855 4
 6 8 0 5248.25 348.829 6
 -6 8 -1 364.158 147.196 4
 6 8 1 357.004 154.135 6
 -6 8 -1 44.262 194.48 6
 -6 8 -2 231.745 135.921 4
 6 8 2 235.571 158.269 6
 -6 8 -2 553.723 238.281 6
 6 8 3 1195.15 201.731 6
 -6 8 -3 1196.29 267.545 6
 -6 8 -4 499.733 219.299 6
 6 8 4 420.387 167.482 6
 -6 8 -5 2573.94 301.803 6
 6 8 5 2787.64 263.564 6
 -6 8 -6 -17.3386 174.262 6
 -6 8 -9 2600.88 177.434 6
 -6 9 12 265.202 95.1818 7
 -6 9 11 394.856 128.318 7
 -6 9 10 575.736 153.223 7
 -6 9 9 1109.48 187.537 7
 -6 9 8 1220.57 199.081 7
 -6 9 7 156.398 155.134 7
 -6 9 6 564.665 179.046 7
 -6 9 5 823.595 182.523 7
 -6 9 4 60.7383 126.457 4
 -6 9 4 62.7667 144.468 6
 -6 9 3 88.507 130.225 4
 -6 9 3 85.2663 148.876 6
 -6 9 2 536.141 144.4 4
 -6 9 2 780.139 204.507 6
 -6 9 1 1016.67 220.076 6
 6 9 0 799.957 155.339 6
 -6 9 0 1190.04 225.934 6
 6 9 1 340.29 135.281 6
 -6 9 -1 38.4124 191.55 6
 6 9 2 4792.39 315.823 6
 -6 9 -2 4680.11 362.748 6
 6 9 3 370.169 148.93 6
 -6 9 -3 340.513 184.269 6
 6 9 4 1069.42 174.388 6
 -6 9 -4 995.737 204.199 6
 -6 9 -5 916.476 180.803 6
 -6 9 -6 1425.7 188.76 6
 -6 10 9 -54.2348 85.7152 7
 -6 10 8 1412.81 150.552 7
 -6 10 7 307.916 109.571 7
 -6 10 6 1149.56 143.697 7
 -6 10 5 -44.276 93.8735 7
 -6 10 4 1582.09 176.838 6
 -6 10 3 183.722 133.14 6
 -6 10 2 2835.18 246.972 6
 -6 10 1 117.042 145.209 6
 -6 10 0 1804.94 220.915 6
 -6 10 -1 145.604 150.087 6
 6 10 2 348.135 100.024 6
 -6 10 -2 858.314 175.352 6
 6 10 3 1153.75 136.82 6
 -6 10 -3 1514.84 189.681 6
 -6 10 -4 985.729 157.041 6
 -6 10 -5 601.17 118.337 6
 -6 11 2 158.152 90.6165 6
 -6 11 1 2083.14 172.366 6
 -6 11 0 98.8923 97.4119 6
 -6 11 -1 1233.35 134.803 6
 -6 11 -2 23.4185 79.1213 6
 -7 0 16 4511.57 275.955 3
 -7 0 15 221.591 133.415 3
 -7 0 14 4006.47 316.083 3
 -7 0 13 -75.9965 153.264 3
 -7 0 12 2112.83 253.283 3
 -7 0 11 -19.8573 162.261 3
 -7 0 10 -19.3773 141.168 3
 -7 0 9 -93.4539 135.187 4
 -7 0 9 130.942 156.723 3
 -7 0 8 12552.2 603.22 4
 -7 0 8 13302.5 639.129 3
 -7 0 7 29.4941 125.805 4
 -7 0 7 88.0259 155.393 3
 -7 0 6 29975.7 1193.94 4
 -7 0 6 32045.7 1231.56 3
 -7 0 5 -29.2057 123.841 4
 -7 0 5 187.75 147.307 3
 -7 0 4 55373.4 2010.36 4
 -7 0 4 56012.8 2037.36 3
 -7 0 3 -121.494 143.685 3
 -7 0 2 22105.5 941.855 3
 -7 0 1 -117.347 128.841 5
 7 0 -1 179.897 168.103 7
 -7 0 0 22308.7 943.821 5
 7 0 0 22105.3 959.88 7
 -7 0 -1 113.778 147.878 5
 7 0 1 100.296 164.994 7
 -7 0 -2 13780.3 692.943 5
 7 0 2 14318.5 708.56 7
 -7 0 -3 387.854 185.135 5
 7 0 3 201.891 191.596 7
 -7 0 -4 6887.59 451.782 5
 7 0 4 5378.86 446.022 7
 -7 0 -5 142.919 180.453 5
 -7 0 -6 3138.82 332.884 5
 -7 0 -7 24.089 214.937 5
 7 0 7 -97.8411 221.742 7
 -7 0 -8 640.158 222.38 5
 7 0 8 322.855 205.222 7
 -7 0 -9 -185.395 183.805 5
 7 0 9 123.568 181.776 7
 -7 0 -10 313.285 168.958 5
 7 0 10 17.1749 151.661 7
 -7 0 -11 13.526 130.663 5
 7 0 11 64.4259 115.592 7
 -7 1 17 1105 129.657 3
 -7 1 16 -78.0087 121.515 3
 -7 1 15 3691.83 305.079 3
 -7 -1 14 -73.2324 121.985 3
 -7 1 14 -76.1748 156.625 3
 -7 -1 13 2803.56 257.29 3
 -7 1 13 2850.32 304.662 3
 -7 -1 12 17.45 132.153 3
 -7 1 12 -21.3967 162.042 3
 -7 -1 11 2606.6 256.819 3
 -7 1 11 2511.01 287.133 3
 -7 1 11 2450.58 240.598 7
 -7 -1 10 87.6503 137.625 3
 -7 1 10 -104.347 178.019 3
 -7 1 9 11102.4 569.774 4
 -7 -1 9 10412.2 547.885 3
 -7 1 9 10951.5 588.401 3
 -7 1 8 293.132 161.281 4
 -7 -1 8 329.057 149.319 3
 -7 1 8 58.5102 142.264 3
 -7 1 7 30617.5 1213.3 4
 -7 -1 7 30445.6 1199.58 3
 -7 1 7 30567.7 1234.69 3
 -7 1 6 49.4853 136.567 4
 -7 -1 6 190.779 135.678 3
 -7 1 6 147.614 157.45 3
 -7 1 5 23269.7 979.047 4
 -7 -1 5 23013.5 964.74 3
 -7 1 5 24665.3 1003.46 3
 -7 1 4 709.821 179.397 3
 -7 -1 4 675.035 172.083 3
 -7 -1 4 556.784 137.095 4
 -7 1 4 638.425 163.017 4
 -7 1 3 16878.1 762.393 3
 -7 -1 3 15876.8 730.429 3
 -7 1 2 2550.17 266.159 3
 -7 -1 2 3023.54 266.047 3
 -7 1 1 3592.98 297.553 5
 -7 -1 1 3551.53 269.624 5
 7 1 -1 2992.19 277.275 7
 -7 1 0 15857 751.866 5
 -7 -1 0 16543.2 731.83 5
 7 -1 0 16371 768.552 7
 7 1 0 16240.9 748.93 7
 -7 1 -1 6473.72 434.76 5
 -7 -1 -1 6947.74 418.522 5
 7 -1 1 6472.32 437.437 7
 7 1 1 7628 450.654 7
 -7 1 -2 10306.1 571.334 5
 -7 -1 -2 10567.6 557.455 5
 7 1 2 11090.2 576.737 7
 -7 1 -3 3380.48 323.113 5
 -7 -1 -3 3092.86 294.958 5
 7 1 3 3352.83 322.774 7
 -7 1 -4 7458.44 497.048 5
 -7 -1 -4 7416.78 478.189 5
 7 1 4 6756.85 480.896 7
 -7 1 -5 73.18 203.125 5
 -7 -1 -5 46.0331 170.366 5
 7 -1 5 -24.6208 212.476 7
 7 1 5 24.2496 209.273 7
 -7 1 -6 148.423 208.634 5
 -7 -1 -6 188.47 191.399 5
 7 -1 6 322.158 238.383 7
 7 1 6 246.824 225.026 7
 -7 -1 -7 560.14 219.411 5
 7 -1 7 120.841 205.215 7
 -7 -1 -8 3696.07 340.739 5
 7 -1 8 3402.56 338.596 7
 -7 -1 -9 39.784 167.708 5
 7 -1 9 -99.3319 182.919 7
 7 1 9 -288.351 199.894 7
 -7 -1 -10 2931.22 274.913 5
 7 -1 10 3193.98 274.091 7
 7 1 10 3576.29 296.45 7
 -7 1 -11 52.8565 124.687 5
 -7 -1 -11 -116.272 112.137 5
 7 1 11 -26.4315 120.434 7
 -7 1 -12 1068.23 121.691 5
 -7 -1 -12 975.084 113.852 5
 7 1 12 915.977 111.442 7
 -7 2 17 -18.8553 91.0692 3
 -7 2 16 191.612 135.348 3
 -7 2 15 258.47 158.852 3
 -7 2 14 1915.69 258.201 3
 -7 2 13 150.555 190.877 3
 -7 2 13 17.3407 128.365 7
 -7 2 12 604.249 214.245 3
 -7 2 12 687.641 177.129 7
 -7 2 11 67.6941 167.027 3
 -7 2 11 40.0096 145.748 7
 -7 2 10 2939.09 300.267 4
 -7 2 10 2734.57 307.124 3
 -7 2 9 157.917 179.143 4
 -7 -2 9 221.29 123.135 3
 -7 2 9 491.072 200.662 3
 -7 2 8 2183.52 264.988 4
 -7 -2 8 2366.83 218.899 3
 -7 2 8 2488.28 279.907 3
 -7 2 7 1470.99 216.615 4
 -7 -2 7 1212.78 175.323 3
 -7 2 7 1286.38 225.651 3
 -7 2 6 8021.49 469.868 4
 -7 -2 6 8003.11 420.629 3
 -7 2 6 7381.18 465.064 3
 -7 2 5 6602.81 414.471 4
 -7 -2 5 5897.09 357.613 3
 -7 2 5 6077.44 405.271 3
 -7 2 4 6336.66 410.501 4
 -7 -2 4 6913.89 386.972 3
 -7 -2 3 471.756 142.334 3
 -7 -2 2 762.651 168.163 3
 -7 -2 1 14764 644.784 5
 7 2 -1 14574.6 672.866 7
 -7 2 0 886.977 196.135 5
 -7 -2 0 669.5 145.478 5
 7 2 0 670.535 168.934 7
 -7 2 -1 26703.2 1145.81 5
 -7 -2 -1 26430 1087.57 5
 7 2 1 28527.4 1131.86 7
 -7 2 -2 22.176 177.699 5
 -7 -2 -2 54.1554 123.88 5
 7 2 2 20.3397 168.331 7
 7 -2 2 202.482 212.287 7
 -7 -2 -3 30729.2 1228.44 5
 7 -2 3 28691.4 1265.71 7
 7 2 3 30901.2 1263.88 7
 -7 -2 -4 145.763 151.875 5
 7 -2 4 72.5409 211.182 7
 7 2 4 504.709 204.822 7
 -7 -2 -5 1266.06 221.956 5
 7 -2 5 1056.24 261.096 7
 7 2 5 1263.89 255.563 7
 -7 -2 -6 111.469 173.816 5
 7 -2 6 48.7081 184.451 7
 7 2 6 24.1853 200.154 7
 -7 2 -7 10929.3 624.909 5
 -7 -2 -7 9940.99 585.79 5
 7 -2 7 10792.3 619.133 7
 7 2 7 11109.2 627.336 7
 -7 2 -8 -22.2776 177.309 5
 -7 -2 -8 -61.9041 149.111 5
 7 -2 8 169.743 186.239 7
 7 2 8 44.6505 205.523 7
 -7 2 -9 9628.81 544.753 5
 -7 -2 -9 9643.76 531.07 5
 7 -2 9 10152.7 537.609 7
 -7 2 -10 515.605 162.893 5
 -7 -2 -10 562.075 154.331 5
 -7 2 -11 6394.6 347.826 5
 -7 -2 -11 6287.07 340.096 5
 7 2 11 6438.61 359.883 7
 7 2 12 188.788 74.1184 7
 -7 3 17 217.807 103.764 3
 -7 3 16 119.47 132.905 3
 -7 3 15 657.766 190.209 3
 -7 3 15 264.054 113.87 7
 -7 3 14 58.6327 171.547 3
 -7 3 14 -31.9663 128.067 7
 -7 3 13 -64.5972 191.217 3
 -7 3 13 -284.526 170.298 7
 -7 3 12 -181.634 194.829 3
 -7 3 12 395.727 185.859 7
 -7 3 11 23.1655 212.186 3
 -7 3 11 87.397 187.479 7
 -7 3 10 588.003 207.726 4
 -7 3 10 22.8521 225.01 3
 -7 3 9 727.059 225.96 4
 -7 3 8 604.972 217.549 4
 -7 3 7 874.869 236.838 4
 -7 3 6 1438.9 233.468 4
 -7 3 5 39.514 172.454 4
 -7 3 5 40.544 170.88 3
 -7 3 4 31217.1 1272.85 4
 -7 3 4 31735.8 1281.53 3
 -7 3 3 3185.6 307.639 3
 -7 3 2 23425.8 976.842 3
 -7 -3 2 20903.9 885.378 3
 -7 3 1 949.814 208.292 3
 -7 -3 1 804.691 160.931 3
 7 3 -1 725.201 153.332 7
 -7 3 0 24062 1052.62 3
 7 3 0 24646.8 1004.98 7
 7 3 1 458.653 170.398 7
 -7 -3 -2 10036.9 515.612 5
 7 3 2 10351.6 560.259 7
 -7 3 -3 5637.52 430.401 5
 -7 -3 -3 5483.48 369.39 5
 7 3 3 5811.67 409.933 7
 -7 3 -4 828.733 232.431 5
 -7 -3 -4 766.709 173.743 5
 7 3 4 715.714 206.37 7
 -7 3 -5 24.5769 199.602 5
 -7 -3 -5 160.217 149.48 5
 7 3 5 323.702 220.311 7
 -7 3 -6 4517.67 403.386 5
 -7 -3 -6 5314.48 378.033 5
 7 3 6 5043.43 410.224 7
 -7 3 -7 642.039 216.021 5
 -7 -3 -7 473.212 166.119 5
 7 3 7 541.078 202.991 7
 -7 3 -8 6529.21 448.221 5
 -7 -3 -8 6790.5 419.824 5
 7 3 8 7110 459.202 7
 -7 3 -9 124.468 163.801 5
 -7 -3 -9 284.324 141.067 5
 7 3 9 110.192 165.728 7
 -7 3 -10 7760.57 425.327 5
 -7 -3 -10 7929.26 414.462 5
 7 3 10 9112.72 453.618 7
 -7 -3 -11 -103.823 80.0566 5
 -7 3 -11 7.97546 80.1648 3
 7 3 11 44.5404 103.544 7
 -7 4 17 15.2375 67.6135 3
 -7 4 16 2273.67 207.808 3
 -7 4 15 247.588 163.984 3
 -7 4 15 160.68 121.722 7
 -7 4 14 1550.75 208.288 7
 -7 4 13 817.101 202.2 7
 -7 4 12 258.921 186.395 7
 -7 4 11 1305.79 259.618 7
 -7 4 10 4118.23 379.566 4
 -7 4 10 3861.01 373.516 3
 -7 4 9 45.201 200.571 4
 -7 4 9 45.5823 205.534 3
 -7 4 8 3963.7 379.519 4
 -7 4 8 4253.15 369.314 3
 -7 4 7 218.426 231.388 4
 -7 4 7 175.155 179.015 3
 -7 4 6 3116.11 336.45 4
 -7 4 6 3143.92 324.294 3
 -7 4 5 4774.92 372.801 3
 -7 4 4 4661.51 368.983 3
 -7 4 3 12217.6 640.68 3
 -7 4 2 2765.63 300.071 3
 -7 4 1 739.988 220.897 3
 -7 4 0 1097.45 223.684 3
 -7 4 -1 -65.7546 175.68 3
 7 4 1 312.085 154.764 7
 -7 4 -2 490.898 214.829 3
 7 4 2 264.605 148.788 7
 -7 4 -3 6973.49 485.289 5
 7 4 3 7184.95 449.916 7
 -7 4 -4 19377.9 925.659 5
 7 4 4 19733.7 894.378 7
 -7 4 -5 19274.9 925.027 5
 -7 -4 -5 19220.3 843.059 5
 7 4 5 20334.8 905.029 7
 -7 -4 -6 2882.75 258.695 5
 -7 4 -6 2632.67 312.375 5
 7 4 6 3213.34 316.425 7
 -7 4 -7 11026.2 595.634 5
 -7 -4 -7 10442.1 531.032 5
 7 4 7 10546.8 584.804 7
 -7 4 -8 458.449 170.772 5
 -7 -4 -8 262.645 122.612 5
 7 4 8 186.808 159.627 7
 -7 4 -9 4142.61 296.403 5
 -7 -4 -9 3576.78 250.353 5
 -7 4 -9 4028.24 272.576 3
 7 4 9 4110.61 305.605 7
 -7 -4 -10 8.5728 70.9505 5
 -7 4 -10 50.6996 82.0024 3
 7 4 10 50.6396 113.568 7
 7 4 11 261.27 86.8279 7
 -7 5 15 1738.64 195.693 3
 -7 5 15 1302.14 161.895 7
 -7 5 14 550.219 182.674 3
 -7 5 14 984.697 176.743 7
 -7 5 13 4849.12 358.024 7
 -7 5 13 4267.43 346.063 3
 -7 5 12 143.82 194.823 3
 -7 5 12 84.696 197.89 7
 -7 5 11 9261.57 561.198 7
 -7 5 11 8623.23 539.646 3
 -7 5 10 157.188 184.734 3
 -7 5 9 8647.23 530.174 3
 -7 5 8 89.05 201.836 3
 -7 5 7 9884.29 574.22 3
 -7 5 6 238.474 173.883 3
 -7 5 5 11557.1 654.317 4
 -7 5 5 11243.7 615.532 3
 -7 5 4 1113.12 257.652 4
 -7 5 4 1539.94 246.863 3
 -7 5 3 19351.5 908.582 4
 -7 5 3 19585.1 893.012 3
 -7 5 2 759.014 167.909 6
 -7 5 2 891.309 240.497 4
 -7 5 2 355.71 197.641 3
 -7 5 1 42.0698 165.145 3
 -7 5 0 3897.91 332.049 3
 -7 5 -1 127.534 165.734 3
 7 5 1 63.0923 124.719 6
 -7 5 -2 18754.9 858.859 3
 7 5 2 17705.9 790.929 7
 7 5 2 18380.9 807.002 6
 -7 5 -3 5081.41 383.774 3
 7 5 3 5117.99 357.206 7
 -7 5 -4 10192.4 564.887 3
 7 5 4 9877.38 543.083 7
 -7 5 -5 2732.53 274.587 3
 7 5 5 2823.99 275.849 7
 -7 5 -6 1274.21 196.954 3
 7 5 6 1299.26 211.072 7
 -7 5 -7 268.652 138.186 3
 7 5 7 35.0368 145.064 7
 -7 5 -8 614.197 134.808 3
 7 5 8 524.808 158.86 7
 7 5 9 569.454 137.795 7
 7 5 10 92.4517 84.299 7
 -7 6 15 28.8752 91.6854 3
 -7 6 15 -27.9181 85.6696 7
 -7 6 14 3178.98 249.618 7
 -7 6 14 3158.86 247.926 3
 -7 6 13 264.922 156.862 3
 -7 6 13 267.627 156.539 7
 -7 6 12 6084.14 416.904 7
 -7 6 12 5950.13 394.935 3
 -7 6 11 251.452 180.801 3
 -7 6 11 21.5759 192.568 7
 -7 6 10 16421.1 816.504 7
 -7 6 10 16352.9 780.721 3
 -7 6 9 -22.4485 210.795 4
 -7 6 9 -63.1903 173.222 3
 -7 6 8 4572.27 407.974 4
 -7 6 8 5833.44 412.056 3
 -7 6 7 68.5428 198.302 4
 -7 6 7 -21.0453 173.068 3
 -7 6 6 90.9747 213.586 4
 -7 6 6 103.907 175.199 3
 -7 6 5 226.423 217.783 4
 -7 6 5 144.268 165.235 3
 -7 6 4 653.936 249.611 4
 -7 6 4 1141.53 213.893 3
 -7 6 3 473.15 217.144 4
 -7 6 3 442.646 176.244 3
 -7 6 2 23290.3 1026.67 4
 -7 6 2 21892.1 953.95 6
 -7 6 2 22729.5 979.581 3
 -7 6 1 6767.56 468.619 4
 -7 6 1 5736.16 400.496 6
 -7 6 1 5922.75 405.188 3
 -7 6 0 11862.2 648.938 4
 -7 6 0 11903.2 609.378 3
 -7 6 -1 95.7796 148.33 3
 7 6 1 126.398 135.613 6
 7 6 2 7206.29 428.088 6
 -7 6 -2 7508.68 446.329 3
 -7 6 -3 409.589 159.539 3
 7 6 3 475.58 173.064 6
 -7 6 -4 1697.05 203.475 3
 -7 6 -5 437.144 138.39 3
 7 6 5 92.574 127.944 7
 7 6 6 1172.22 176.209 7
 7 6 7 761.678 147.902 7
 7 6 8 -10.8985 93.5108 7
 7 6 9 308.874 80.232 7
 -7 7 14 -8.28793 82.9459 3
 -7 7 14 -30.3841 91.3359 7
 -7 7 13 968.41 155.586 3
 -7 7 13 838.978 157.646 7
 -7 7 12 327.149 137.187 3
 -7 7 12 65.9448 163.731 7
 -7 7 11 3327.95 277.46 3
 -7 7 10 439.607 169.094 3
 -7 7 9 7488.98 492.627 7
 -7 7 9 7240.68 439.329 3
 -7 7 8 1785.86 273.154 4
 -7 7 8 2382.3 256.934 3
 -7 7 7 21.4143 181.764 4
 -7 7 7 428.415 165.493 3
 -7 7 6 3995.21 356.844 4
 -7 7 6 3059.51 287.067 3
 -7 7 5 669.866 223.864 4
 -7 7 5 751.182 175.281 3
 -7 7 4 990.105 239.794 4
 -7 7 4 792.344 179.325 3
 -7 7 3 1175.73 227.742 4
 -7 7 3 1419.07 204.468 3
 -7 7 3 941.731 175.631 6
 -7 7 2 254.63 203.151 4
 -7 7 2 69.1014 133.837 3
 -7 7 2 253.233 162.346 6
 -7 7 1 6521.85 450.451 4
 -7 7 1 7512.83 445.56 6
 -7 7 1 6251.82 392.279 3
 -7 7 0 757.617 222.417 4
 -7 7 0 863.117 166.003 3
 -7 7 0 690.801 206.662 6
 -7 7 -1 455.906 186.282 4
 7 7 1 88.8125 120.414 6
 -7 7 -1 376.012 195.344 6
 -7 7 -2 2627.41 303.54 6
 -7 7 -2 2621.58 272.645 4
 7 7 2 2505.55 246.028 6
 -7 7 -3 144.752 200.701 6
 -7 7 -3 105.396 147.223 4
 -7 7 -4 2388.31 248.038 4
 -7 7 -5 325.528 131.448 4
 -7 7 -6 2269.77 191.764 4
 -7 7 -7 -55.3579 140.278 6
 -7 7 -8 3396.38 237.315 6
 -7 8 12 434.122 91.3448 3
 -7 8 12 490.14 137.305 7
 -7 8 11 210.358 100.502 3
 -7 8 11 782.756 166.647 7
 -7 8 10 813.268 144.054 3
 -7 8 10 1106.09 201.96 7
 -7 8 9 448.282 135.912 3
 -7 8 9 456.985 181.174 7
 -7 8 8 448.995 136.74 3
 -7 8 8 271.622 178.143 7
 -7 8 7 2063.08 258.109 4
 -7 8 7 1813.53 198.854 3
 -7 8 6 -18.6149 164.331 4
 -7 8 6 170.271 122.498 3
 -7 8 5 1874.87 244.668 4
 -7 8 5 1189.65 169.558 3
 -7 8 4 336.405 174.98 4
 -7 8 3 1326.03 223.306 4
 -7 8 3 1379.14 190.076 6
 -7 8 2 846.183 184.903 4
 -7 8 2 684.627 175.864 6
 -7 8 1 104.202 151.634 4
 -7 8 1 123.827 156.172 6
 -7 8 0 380.551 158.267 4
 -7 8 0 531.709 190.207 6
 -7 8 -1 4850.12 329.05 4
 -7 8 -1 4932.36 363.587 6
 -7 8 -2 -41.9147 119.88 4
 7 8 2 -25.581 121.264 6
 -7 8 -2 36.558 168.274 6
 -7 8 -3 3028.17 233.657 4
 -7 8 -3 3239.1 292.496 6
 -7 8 -4 -64.9824 161.201 6
 -7 8 -5 4340.93 312.729 6
 -7 8 -6 500.601 149.904 6
 -7 8 -7 1846.99 167.695 6
 -7 9 11 329.935 97.715 7
 -7 9 10 518.704 129.528 7
 -7 9 9 315.851 139.744 7
 -7 9 8 386.985 142.149 7
 -7 9 7 392.63 149.726 7
 -7 9 6 2946.7 257.002 7
 -7 9 5 154.945 139.082 7
 -7 9 4 4176.64 288.376 4
 -7 9 3 -13.3464 120.989 4
 -7 9 2 3679.53 257.409 4
 -7 9 2 3183.51 258.303 6
 -7 9 1 93.8431 112.278 4
 -7 9 1 -14.3233 133.193 6
 -7 9 0 599.816 164.716 6
 -7 9 -1 536.937 167.536 6
 -7 9 -2 1618.68 201.957 6
 -7 9 -3 465.42 149.211 6
 -7 9 -4 1464.59 171.79 6
 -7 9 -5 114.156 104.579 6
 -7 10 8 468.95 84.0453 7
 -7 10 7 -49.4488 67.3629 7
 -7 10 6 606.793 105.867 7
 -7 10 1 530.184 118.634 6
 -7 10 0 342.391 111.865 6
 -7 10 -1 1128.94 140.019 6
 -7 10 -2 520.341 105.773 6
 -7 10 -3 161.025 80.2987 6
 -8 0 15 -23.7587 100.737 3
 -8 0 14 977.635 169.431 3
 -8 0 13 -103.869 145.079 3
 -8 0 12 37.7203 151.124 3
 -8 0 11 -19.7926 153.214 3
 -8 0 10 420.166 182.832 3
 -8 0 9 -31.9554 126.308 4
 -8 0 9 -19.9787 166.364 3
 -8 0 8 15678 707.664 4
 -8 0 8 15387.8 743.687 3
 -8 0 7 210.846 143.169 4
 -8 0 7 -59.6545 168.636 3
 -8 0 6 15774.1 710.108 4
 -8 0 6 15166.2 735.011 3
 -8 0 5 -100.553 139.561 4
 -8 0 5 19.8928 149.534 3
 -8 0 4 10926.2 568.523 4
 -8 0 4 11794.6 608.583 3
 -8 0 3 82.173 154.437 3
 -8 0 2 2315.05 282.856 3
 -8 0 1 43.3425 191.276 3
 -8 0 0 1063.33 202.318 5
 -8 0 -1 150.036 161.195 5
 8 0 1 184.656 199.266 7
 -8 0 -2 224.026 180.973 5
 8 0 2 431.744 221.035 7
 -8 0 -3 23.1573 175.379 5
 8 0 3 49.3095 207.821 7
 -8 0 -4 824.45 227.32 5
 8 0 4 1545.79 273.418 7
 -8 0 -5 117.055 196.18 5
 -8 0 -6 5073.02 400.074 5
 -8 0 -7 20.8543 161.433 5
 -8 0 -8 311.8 166.439 5
 8 0 8 133.151 183.895 7
 -8 0 -9 -135.937 131.857 5
 8 0 9 15.4959 133.748 7
 -8 0 -10 610.557 125.802 5
 -8 1 16 469.86 113.937 3
 -8 1 15 4882.75 320.526 3
 -8 1 14 1023.43 196.728 3
 -8 -1 13 1318.05 183.028 3
 -8 1 13 1523.25 226.754 3
 -8 -1 12 16.2551 125.841 3
 -8 1 12 123.36 176.414 3
 -8 -1 11 156.109 134.454 3
 -8 1 11 363.797 186.92 3
 -8 1 11 201.232 127.192 7
 -8 -1 10 142.96 142.274 3
 -8 1 10 64.7357 172.939 3
 -8 1 9 923.867 195.944 4
 -8 -1 9 881.282 181.949 3
 -8 1 9 1160.19 234.777 3
 -8 1 8 166.42 154.019 4
 -8 -1 8 126.223 135.588 3
 -8 1 8 21.4514 181.941 3
 -8 1 7 2455.84 267.811 4
 -8 -1 7 2650.42 261.586 3
 -8 1 7 2549.55 295.47 3
 -8 1 6 8806.44 503.17 4
 -8 -1 6 8071.62 474.941 3
 -8 1 6 9075.09 522.5 3
 -8 1 5 9207.82 513.75 4
 -8 -1 5 8563.25 496.06 3
 -8 1 5 9258.65 533.362 3
 -8 -1 4 4001.17 294.401 4
 -8 1 4 4427.45 347.303 4
 -8 -1 4 4037.78 329.426 3
 -8 1 4 4425.31 361.924 3
 -8 1 3 409.384 183.439 3
 -8 -1 3 600.285 191.149 3
 -8 1 2 11929 628.707 3
 -8 -1 2 10626.1 586.858 3
 -8 1 1 808.83 227.027 3
 -8 -1 1 662.316 186.16 3
 -8 1 0 13849.4 707.458 5
 -8 -1 0 14345 672.6 5
 8 1 0 12842.8 681.468 7
 -8 1 -1 113.073 173.824 5
 -8 -1 -1 20.0048 142.194 5
 8 1 1 156.572 189.69 7
 -8 1 -2 11922.3 659.056 5
 -8 -1 -2 12172 631.393 5
 8 -1 2 12537 683.861 7
 8 1 2 11439 650.729 7
 -8 1 -3 -24.054 175.277 5
 -8 -1 -3 218.794 177.672 5
 8 1 3 192.13 207.29 7
 -8 1 -4 777.704 226.289 5
 -8 -1 -4 781.868 204.098 5
 8 1 4 779.17 234.415 7
 -8 1 -5 4799.11 405.764 5
 -8 -1 -5 4759.18 384.714 5
 8 1 5 5234.95 422.013 7
 -8 1 -6 298.491 198.274 5
 -8 -1 -6 214.233 183.949 5
 8 -1 6 140.557 199.952 7
 8 1 6 209.015 211.741 7
 -8 1 -7 1519.88 255.03 5
 -8 -1 -7 1069.07 211.339 5
 8 -1 7 1129.43 240.201 7
 8 1 7 1479.86 251.287 7
 -8 1 -8 626.841 181.375 5
 -8 -1 -8 850.288 186.769 5
 8 -1 8 789.573 202.502 7
 -8 -1 -9 397.502 143.268 5
 -8 -1 -10 1315.96 151.653 5
 8 1 10 1431.28 164.027 7
 -8 2 16 281.96 118.226 3
 -8 2 15 873.977 176.989 3
 -8 2 14 1309.66 211.875 3
 -8 2 13 3409.24 265.074 7
 -8 2 13 3681.58 327.097 3
 -8 2 12 278.487 181.96 3
 -8 2 12 349.325 140.347 7
 -8 2 11 3582.01 302.822 7
 -8 2 11 3375.05 343.136 3
 -8 2 10 506.735 201.465 4
 -8 2 10 904.462 225.448 3
 -8 2 9 3086.09 302.984 4
 -8 2 9 2912.11 305.48 3
 -8 2 8 -122.613 160.44 4
 -8 -2 8 77.4899 119.977 3
 -8 2 8 225.128 200.875 3
 -8 2 7 203.582 175.758 4
 -8 -2 7 174.452 128.854 3
 -8 2 7 44.6653 188.31 3
 -8 2 6 632.986 213.582 4
 -8 -2 6 468.547 145.929 3
 -8 2 6 532.213 213.901 3
 -8 2 5 12844.3 666.238 4
 -8 -2 5 12426.6 607.711 3
 -8 2 5 13075.9 683.976 3
 -8 -2 4 -68.4187 134.285 3
 -8 2 4 155.138 190.158 3
 -8 2 4 20.6658 176.282 4
 -8 -2 3 13214.6 641.64 3
 -8 -2 2 -18.5894 154.795 3
 -8 -2 1 28731.7 1173.91 3
 -8 -2 0 1065.19 176.854 5
 8 2 0 1597.44 234.986 7
 -8 2 -1 30349 1250.1 5
 -8 -2 -1 28662.9 1165.46 5
 8 2 1 27848.9 1201.07 7
 -8 2 -2 1378.06 252.359 5
 -8 -2 -2 1557.78 217.45 5
 8 2 2 1814.42 258.982 7
 -8 2 -3 15215.9 779.585 5
 -8 -2 -3 14078.7 707.346 5
 8 2 3 15552.8 761.335 7
 -8 2 -4 220.744 209.284 5
 -8 -2 -4 205.183 151.962 5
 8 2 4 46.8573 187.799 7
 -8 -2 -5 3666.86 316.549 5
 8 2 5 3870.68 367.38 7
 -8 -2 -6 604.9 171.603 5
 8 2 6 709.619 224.796 7
 -8 -2 -7 2911.74 272.314 5
 8 2 7 3382.37 318.705 7
 -8 -2 -8 169.662 135.426 5
 8 2 8 17.8016 160.571 7
 -8 2 -9 4279.63 292.213 5
 -8 -2 -9 3956.26 266.266 5
 8 2 9 4231.26 298.226 7
 -8 -2 -10 160.889 77.4411 5
 -8 2 -10 275.259 103.373 3
 -8 3 16 483.717 125.211 3
 -8 3 15 170.361 139.12 3
 -8 3 14 463.054 170.753 3
 -8 3 14 421.848 125.416 7
 -8 3 13 -78.4756 176.922 3
 -8 3 13 16.3957 128.72 7
 -8 3 12 5659 386.443 7
 -8 3 12 5121.16 410.214 3
 -8 3 11 610.263 228.487 3
 -8 3 11 270.648 174.901 7
 -8 3 10 4915.13 398.923 4
 -8 3 10 5531.26 430.722 3
 -8 3 9 131.14 191.874 4
 -8 3 9 69.5283 212.301 3
 -8 3 8 8778 538.92 4
 -8 3 7 1884.53 288.279 4
 -8 3 6 8105.35 520.64 4
 -8 3 5 15202.8 760.942 4
 -8 3 4 6875.79 481.462 4
 -8 3 3 321.962 207.68 3
 -8 3 3 356.426 217.428 4
 -8 3 2 10916.7 612.548 3
 -8 -3 2 10179.4 526.66 3
 -8 3 1 8551.33 538.703 3
 -8 -3 1 8414.23 473.207 3
 -8 3 0 6500.05 468.736 3
 -8 -3 0 6297.94 406.355 3
 8 3 0 6348.95 407.8 7
 -8 3 -1 7489.4 513.989 3
 8 3 1 7335.99 457.468 7
 -8 3 -2 12331.6 693.394 3
 8 3 2 13343.1 671.709 7
 -8 -3 -3 348.955 130.47 5
 8 3 3 152.255 176.825 7
 -8 -3 -4 1051.27 176.786 5
 8 3 4 615.192 212.202 7
 -8 3 -5 463.439 221.845 5
 -8 -3 -5 70.2772 128.129 5
 8 3 5 215.882 189.578 7
 -8 3 -6 7640.3 488.241 5
 -8 -3 -6 7752.37 435.156 5
 8 3 6 7446.27 471.41 7
 -8 3 -7 266.771 165.414 5
 -8 -3 -7 29.714 110.866 5
 8 3 7 74.3408 165.855 7
 -8 3 -8 9492.06 487.273 5
 -8 -3 -8 7757.42 419.494 5
 -8 3 -8 9159.42 466.997 3
 8 3 8 9492.41 482.098 7
 -8 -3 -9 54.5646 76.2472 5
 -8 3 -9 100.02 113.142 3
 8 3 9 165.798 121.522 7
 8 3 10 3959.04 231.103 7
 -8 4 16 583.612 114.781 3
 -8 4 15 563.616 150.567 3
 -8 4 14 1363.8 197.507 3
 -8 4 14 681.646 149.111 7
 -8 4 13 33.3428 138.826 7
 -8 4 12 1549.59 223.794 7
 -8 4 11 2374.84 284.309 7
 -8 4 10 419.031 217.338 4
 -8 4 9 5126.71 423.587 4
 -8 4 8 -68.5818 186.81 4
 -8 4 8 -46.2979 187.95 3
 -8 4 7 8331.54 534.82 4
 -8 4 7 8423.7 536.002 3
 -8 4 6 850.337 238.061 4
 -8 4 6 1158.17 245.582 3
 -8 4 5 3393 363.191 4
 -8 4 5 2630.01 310.973 3
 -8 4 4 8654.25 569.122 4
 -8 4 4 8809.3 548.573 3
 -8 4 3 46.0942 195.44 3
 -8 4 2 741.461 226.138 3
 -8 4 1 3436.72 331.458 3
 -8 4 0 491.879 217.304 3
 -8 4 -1 18203.8 865.201 3
 8 4 1 17361.6 786.925 7
 -8 4 -2 -46.4062 196.758 3
 8 4 2 57.102 138.667 7
 -8 4 -3 9670.33 558.881 3
 8 4 3 8677.98 507.543 7
 -8 4 -4 86.5564 174.586 3
 8 4 4 157.679 154.791 7
 -8 4 -5 7898.23 485.128 3
 8 4 5 8157.49 476.144 7
 -8 4 -6 106.899 148.357 3
 8 4 6 -89.2981 159.352 7
 -8 4 -7 5390.66 344.547 3
 8 4 7 5331.1 346.661 7
 -8 4 -8 582.051 133.134 3
 8 4 8 530.282 143.146 7
 8 4 9 3718.65 233.557 7
 -8 5 15 918.153 106.604 7
 -8 5 14 230.782 139.322 3
 -8 5 14 -12.124 107.622 7
 -8 5 13 1621.17 221.686 3
 -8 5 13 1382.08 198.241 7
 -8 5 12 608.276 192.248 3
 -8 5 12 482.174 185.646 7
 -8 5 11 9946.25 568.922 7
 -8 5 11 10325.4 572.154 3
 -8 5 10 170.972 174.722 3
 -8 5 9 6082.52 466.254 4
 -8 5 9 6787.89 463.28 3
 -8 5 8 290.101 203.566 3
 -8 5 7 1863.2 274.399 3
 -8 5 6 3913.88 356.536 3
 -8 5 5 1488.1 262.552 3
 -8 5 4 19145.4 897.594 3
 -8 5 3 1370.23 272.467 4
 -8 5 3 471.078 202.863 3
 -8 5 2 1583.66 304.698 4
 -8 5 2 2213.07 292.555 3
 -8 5 1 422.284 203.946 3
 -8 5 1 330.341 226.165 4
 -8 5 0 1124.93 242.525 3
 -8 5 -1 7299.53 476.111 3
 -8 5 -2 252.238 191.716 3
 -8 5 -3 -19.9552 162.071 3
 8 5 3 244.001 132.992 7
 -8 5 -4 5988.52 394.554 3
 8 5 4 5764.05 362.966 7
 -8 5 -5 97.9927 140.945 3
 8 5 5 -93.0842 125.955 7
 -8 5 -6 1730.9 197.875 3
 8 5 6 1836.85 199.876 7
 -8 5 -7 143.716 100.201 3
 8 5 7 180.947 112.288 7
 8 5 8 1203.74 138.041 7
 -8 6 14 1226.48 148.596 3
 -8 6 14 910.59 128.113 7
 -8 6 13 12.978 126.51 3
 -8 6 13 -54.2344 112.905 7
 -8 6 12 3961.83 303.919 7
 -8 6 12 3407.22 281.724 3
 -8 6 11 154.626 154.998 3
 -8 6 11 113.452 181.021 7
 -8 6 10 6408.39 436.301 7
 -8 6 10 5749.16 401.716 3
 -8 6 9 1084.4 215.651 3
 -8 6 8 2450.67 287.973 3
 -8 6 7 422.381 220.261 4
 -8 6 7 596.993 195.904 3
 -8 6 6 4883.55 429.404 4
 -8 6 6 5686.99 401.833 3
 -8 6 5 1858.65 301.142 4
 -8 6 5 2597.55 287.442 3
 -8 6 4 3569.03 385.721 4
 -8 6 4 4348.89 356.495 3
 -8 6 3 318.456 217.804 4
 -8 6 3 143.477 165.461 3
 -8 6 2 838.406 260.615 4
 -8 6 2 768.704 204.956 3
 -8 6 1 7038.01 499.189 4
 -8 6 1 7308.17 422.159 6
 -8 6 1 7664.76 465.706 3
 -8 6 0 1053.61 243.112 4
 -8 6 0 1710.27 223.915 3
 -8 6 0 1120.92 199.957 6
 -8 6 -1 960.813 195.06 6
 -8 6 -1 743.804 237.915 4
 -8 6 -1 1046.63 201.179 3
 -8 6 -2 141.661 183.53 4
 -8 6 -2 171.743 147.45 3
 -8 6 -3 639.057 163.211 3
 -8 6 -4 134.925 117.851 3
 -8 6 -6 1832.79 190.219 4
 -8 6 -7 -25.5538 89.8606 4
 -8 6 -8 2126.23 164.179 6
 -8 7 13 526.131 106.774 3
 -8 7 13 669.633 122.448 7
 -8 7 12 351.205 121.042 3
 -8 7 12 292.973 134.825 7
 -8 7 11 2669.29 228.935 3
 -8 7 10 641.457 160.393 3
 -8 7 9 2563.2 249.963 3
 -8 7 8 953.46 226.343 4
 -8 7 8 1554.69 209.954 3
 -8 7 7 336.216 195.552 4
 -8 7 7 205.943 155.801 3
 -8 7 6 4006.77 347.817 4
 -8 7 6 3750.61 305.355 3
 -8 7 5 -61.3651 188.342 4
 -8 7 5 225.392 149.669 3
 -8 7 4 4877.21 399.033 4
 -8 7 4 5938.75 373.736 3
 -8 7 3 509.04 212.565 4
 -8 7 3 758.344 170.027 3
 -8 7 2 5759.58 411.924 4
 -8 7 2 5046.78 343.803 3
 -8 7 1 841.86 223.841 4
 -8 7 1 699.919 156.784 3
 -8 7 1 694.875 158.655 6
 -8 7 0 2745.58 287.159 4
 -8 7 0 3139.39 265.882 6
 -8 7 0 2916.58 241.671 3
 -8 7 -1 461.736 173.577 4
 -8 7 -1 420.128 129.751 3
 -8 7 -1 278.844 163.239 6
 -8 7 -2 2908.23 271.816 4
 -8 7 -2 3056.43 273.556 6
 -8 7 -3 188.979 145.678 4
 -8 7 -3 280.485 155.462 6
 -8 7 -4 2015.58 200.098 4
 -8 7 -4 1834.95 213.264 6
 -8 7 -5 95.154 95.2514 4
 -8 7 -5 12.5728 124.22 6
 -8 7 -6 1102.38 142.73 6
 -8 8 11 554.205 127.233 7
 -8 8 10 567.441 112.356 3
 -8 8 10 992.171 167.881 7
 -8 8 9 735.481 133.682 3
 -8 8 9 988.379 178.313 7
 -8 8 8 78.2135 100.837 3
 -8 8 8 230.314 160.409 7
 -8 8 7 3392.71 240.504 3
 -8 8 6 16.3592 152.114 4
 -8 8 6 12.058 102.25 3
 -8 8 5 7769.02 433.207 4
 -8 8 5 6230.93 350.554 3
 -8 8 4 232.425 158.325 4
 -8 8 3 7805.9 444.239 4
 -8 8 2 742.768 181.298 4
 -8 8 1 1472.27 195.05 4
 -8 8 0 27.878 128.969 4
 -8 8 0 -63.7834 119.204 6
 -8 8 -1 4668.59 291.575 4
 -8 8 -1 4089.54 282.069 6
 -8 8 -2 53.5556 109.022 4
 -8 8 -2 37.3149 119.606 6
 -8 8 -3 2565.57 213.871 6
 -8 8 -4 40.3225 103.447 6
 -8 8 -5 2716.18 180.448 6
 -8 9 10 642.059 100.251 7
 -8 9 9 510.779 107.668 7
 -8 9 8 2383.08 199.217 7
 -8 9 7 248.614 121.256 7
 -8 9 6 2465.56 215.073 7
 -8 9 5 122.938 108.579 7
 -8 9 4 3645.05 246.418 4
 -8 9 3 179.939 108.769 4
 -8 9 2 1090.95 144.721 4
 -8 9 -1 -40.395 78.7633 6
 -8 9 -2 1432.96 130.787 6
 -9 0 14 2812.38 222.373 3
 -9 0 13 -28.8274 117.783 3
 -9 0 12 1048.85 190.482 3
 -9 0 11 -36.6823 137.867 3
 -9 0 10 715.474 194.921 3
 -9 0 9 -140.284 165.907 3
 -9 0 8 4040.82 299.139 4
 -9 0 8 4077.48 337.699 3
 -9 0 7 66.0181 125.949 4
 -9 0 7 105.205 166.352 3
 -9 0 6 2194.48 232.257 4
 -9 0 6 2202.66 274.235 3
 -9 0 5 89.0352 152.788 4
 -9 0 5 -43.5411 172.099 3
 -9 0 4 388.123 161.698 4
 -9 0 4 265.715 195.746 3
 -9 0 3 90.746 181.779 3
 -9 0 3 -38.195 160.004 4
 -9 0 2 1571.43 264.242 3
 -9 0 1 23.5508 209 3
 -9 0 0 10208.1 605.028 3
 -9 0 -1 -96.4792 199.626 3
 -9 0 -2 2974.12 302.063 5
 -9 0 -3 -43.6206 162.697 5
 -9 0 -4 4484.82 358.305 5
 -9 0 -5 98.4211 162.926 5
 -9 0 -6 6086.38 392.986 5
 -9 0 -7 134.98 125.731 5
 -9 0 -8 366.826 117.465 5
 -9 0 -8 698.016 153.026 3
 -9 1 15 1210.12 152.747 3
 -9 1 14 1430.97 186.493 3
 -9 1 13 503.441 163.352 3
 -9 1 12 3145.54 283.94 3
 -9 -1 12 2636.96 230.704 3
 -9 -1 11 -62.4193 130.741 3
 -9 1 11 179.962 165.473 3
 -9 -1 10 9048.83 494.257 3
 -9 1 10 9699.04 551.095 3
 -9 1 9 17.8257 147.52 4
 -9 -1 9 17.7558 136.467 3
 -9 1 9 107.884 187.276 3
 -9 1 8 111.004 142.24 4
 -9 -1 8 55.1539 131.815 3
 -9 1 8 287.49 195.223 3
 -9 1 7 1444.21 222.41 4
 -9 -1 7 1732.59 226.952 3
 -9 1 7 2111.25 282.78 3
 -9 1 6 1424.5 216.794 4
 -9 -1 6 1425.66 211.63 3
 -9 1 6 1656.68 252.24 3
 -9 1 5 460.792 189.381 4
 -9 -1 5 220.579 162.149 3
 -9 1 5 436.916 205.498 3
 -9 1 4 4060.67 347.407 4
 -9 -1 4 4006.88 343.795 3
 -9 1 4 4655.13 383.746 3
 -9 1 3 1609.32 276.814 3
 -9 -1 3 1762.49 247.321 3
 -9 -1 3 1733.49 208.473 4
 -9 1 3 1908.6 262.995 4
 -9 1 2 6723.82 471.07 3
 -9 -1 2 6610.17 451.433 3
 -9 1 1 3382.41 362.12 3
 -9 -1 1 2966.83 316.139 3
 -9 1 0 7101.43 500.771 3
 -9 -1 0 7528.93 489.301 3
 -9 1 -1 4561.67 390.852 3
 -9 -1 -1 3201.54 324.366 3
 -9 -1 -2 507.214 168.682 5
 -9 1 -2 636.178 248.526 3
 9 1 2 394.699 204.438 7
 -9 1 -3 4225.3 366.963 5
 -9 -1 -3 3989.73 335.29 5
 9 1 3 4529.19 379.815 7
 -9 1 -4 196.176 186.024 5
 -9 -1 -4 156.048 138.745 5
 9 1 4 199.872 190.635 7
 -9 1 -5 2999.06 295.396 5
 -9 -1 -5 2531.96 254.48 5
 9 1 5 3114.01 307.379 7
 -9 1 -6 -18.0834 163.122 5
 -9 -1 -6 358.106 143.72 5
 9 1 6 -18.6359 175.035 7
 -9 1 -7 1379.34 196.024 5
 -9 -1 -7 1631.1 184.707 5
 -9 -1 -8 211.87 98.6363 5
 -9 1 -8 74.3589 121.998 3
 -9 1 -9 1223.9 129.374 3
 -9 -1 -9 1268.31 129.405 3
 -9 2 15 2033.97 191.614 3
 -9 2 14 56.8567 131.525 3
 -9 2 13 5486.22 370.156 3
 -9 2 12 -19.1255 156.28 3
 -9 2 12 14.3859 111.36 7
 -9 2 11 7205.38 424.2 7
 -9 2 11 7656.84 481.623 3
 -9 2 10 829.126 196.949 4
 -9 2 10 913.968 233.028 3
 -9 2 9 5741.44 404.433 4
 -9 2 9 5788.37 431.373 3
 -9 2 8 815.094 214.55 4
 -9 2 8 596.461 219.745 3
 -9 2 7 12484.1 648.297 4
 -9 -2 7 11095 571.739 3
 -9 2 7 13435.6 687.006 3
 -9 2 6 7872.81 502.58 4
 -9 -2 6 7619.43 433.731 3
 -9 2 6 7504.52 500.845 3
 -9 2 5 2081.59 275.782 4
 -9 -2 5 1848.74 220.736 3
 -9 2 5 1590.46 279.1 3
 -9 2 4 2562.12 319.956 4
 -9 -2 4 2783.41 264.86 3
 -9 2 4 2610.54 305.781 3
 -9 2 3 10914.3 625.608 4
 -9 -2 3 11117.9 583.479 3
 -9 2 3 12099.8 664.674 3
 -9 -2 2 19.7849 145.295 3
 -9 -2 1 15075.6 731.931 3
 -9 -2 0 1570.47 244.277 3
 -9 -2 -1 25202.5 1083.73 3
 9 2 2 -65.2489 181.121 7
 -9 -2 -3 1690.94 207.159 5
 -9 2 -3 1944.37 298.406 3
 9 2 3 1553.19 249.865 7
 -9 -2 -4 1700.07 209.632 5
 -9 2 -4 1656.3 274.044 3
 9 2 4 1560.58 243.333 7
 -9 -2 -5 251.981 131.392 5
 -9 2 -5 241.885 188.529 3
 9 2 5 252.08 181.375 7
 -9 -2 -6 69.2727 116.811 5
 -9 2 -6 35.297 167.34 3
 9 2 6 138.534 158.628 7
 -9 -2 -7 565.989 117.855 5
 -9 2 -7 861.503 173.631 3
 9 2 7 497.554 154.476 7
 -9 2 -8 731.838 137.441 3
 -9 -2 -8 615.467 121.254 3
 -9 3 15 21.4923 108.917 3
 -9 3 14 3701.09 276.99 3
 -9 3 13 315.496 168.418 3
 -9 3 13 150.456 105.878 7
 -9 3 12 4354.37 312.738 7
 -9 3 12 4829.18 362.787 3
 -9 3 11 557.113 203.033 3
 -9 3 11 659.252 174.773 7
 -9 3 10 4860.02 381.305 4
 -9 3 10 4940.1 399.589 3
 -9 3 9 20.8212 186.796 4
 -9 3 9 203.013 206.625 3
 -9 3 8 8177.22 520.283 4
 -9 3 8 8598.41 545.162 3
 -9 3 7 528.204 220.927 4
 -9 3 6 15068.1 764.869 4
 -9 3 5 1071.57 258.99 4
 -9 3 4 647.063 222.172 4
 -9 3 3 93.4217 217.188 4
 -9 3 2 2901.16 335.658 3
 -9 -3 2 2199.84 226.87 3
 -9 3 2 2564.02 330.327 4
 -9 3 1 537.717 236.392 3
 -9 -3 1 298.769 145.918 3
 -9 3 0 11159 630.195 3
 -9 -3 0 9243.14 517.126 3
 -9 3 -1 167.453 208.883 3
 -9 -3 -1 185.046 148.386 3
 -9 3 -2 13382.8 695.103 3
 -9 -3 -2 11674.2 614.938 3
 9 3 2 13122.1 642.974 7
 -9 3 -3 -88.4414 217.471 3
 -9 -3 -3 252.409 154.708 3
 9 3 3 -19.3523 154.041 7
 -9 3 -4 3688.52 328.596 3
 9 3 4 4327.17 332.604 7
 -9 3 -5 1191.31 222.313 3
 9 3 5 1526.7 215.785 7
 -9 3 -6 3015.92 269.19 3
 9 3 6 3294.08 265.327 7
 -9 3 -7 1478.94 174.691 3
 -9 -3 -7 1199.86 151.254 3
 9 3 7 1298.78 165.706 7
 -9 3 -8 2770.65 187.193 3
 -9 4 14 137.737 131.612 3
 -9 4 14 69.4581 74.9788 7
 -9 4 13 3425.41 254.208 7
 -9 4 13 4533.71 312.1 3
 -9 4 12 63.5229 139.407 7
 -9 4 11 2581.8 265.054 7
 -9 4 10 713.693 201.438 4
 -9 4 9 3226.79 331.513 4
 -9 4 8 -21.8024 209.635 4
 -9 4 7 4470.32 385.989 4
 -9 4 7 3536.99 370.072 3
 -9 4 6 4398.67 407.668 4
 -9 4 6 4540.37 396.505 3
 -9 4 5 15016.1 790.729 4
 -9 4 5 16272.7 804.058 3
 -9 4 4 4596.12 398.819 4
 -9 4 4 3383.96 366.896 3
 -9 4 3 5126.82 433.503 4
 -9 4 3 5811.1 441.752 3
 -9 4 2 609.686 230.466 3
 -9 4 1 4956.69 409.245 3
 -9 4 0 942.066 238.712 3
 -9 4 -1 4167.63 374.235 3
 -9 4 -2 85.0494 175.976 3
 -9 4 -3 2140.02 265.687 3
 9 4 3 1956.86 222.047 7
 -9 4 -4 4325.86 331.268 3
 9 4 4 3984.42 293.827 7
 -9 4 -5 2470.89 238.499 3
 9 4 5 1760.21 196.516 7
 -9 4 -6 3497.84 254.087 3
 -9 4 -7 1234.22 134.475 3
 -9 5 14 46.4543 68.7255 7
 -9 5 13 671.349 158.189 3
 -9 5 13 1004.21 148.358 7
 -9 5 12 443.379 164.327 3
 -9 5 12 768.943 164.796 7
 -9 5 11 397.365 178.493 3
 -9 5 11 417.195 177.412 7
 -9 5 10 1226.99 223.828 3
 -9 5 9 -40.0574 189.887 4
 -9 5 9 99.6673 196.051 3
 -9 5 8 8025.13 520.617 4
 -9 5 8 7547.04 484.515 3
 -9 5 7 130.315 222.92 4
 -9 5 7 169.799 188.423 3
 -9 5 6 6261.95 448.551 3
 -9 5 5 284.357 211.493 3
 -9 5 4 4791.82 383.308 3
 -9 5 3 3486.6 329.914 3
 -9 5 2 753.106 227.442 3
 -9 5 1 4184.27 392.031 4
 -9 5 1 3686.85 339.523 3
 -9 5 0 326.904 220.945 4
 -9 5 0 61.1791 170.937 3
 -9 5 -1 582.303 194.695 3
 -9 5 -1 836.377 239.546 4
 -9 5 -2 487.196 174.224 3
 -9 5 -3 1139.46 195.835 3
 -9 5 -4 252.419 138.775 3
 -9 5 -5 4050.68 263.735 3
 -9 5 -6 437.512 118.684 4
 -9 5 -6 117.508 80.3652 3
 -9 5 -7 3685.81 205.787 4
 -9 6 13 -47.935 96.366 3
 -9 6 13 -47.229 88.2774 7
 -9 6 12 1733.63 189.843 3
 -9 6 12 1962.18 195.314 7
 -9 6 11 41.9307 124.036 3
 -9 6 11 -30.246 140.619 7
 -9 6 10 1925.97 225.405 3
 -9 6 10 1742.51 231.353 7
 -9 6 9 678.831 191.654 3
 -9 6 8 -142.566 160.773 3
 -9 6 7 1714.66 234.347 3
 -9 6 6 122.276 211.725 4
 -9 6 6 206.433 173.724 3
 -9 6 5 227.656 212.401 4
 -9 6 5 56.7963 162.486 3
 -9 6 4 124.856 201.069 4
 -9 6 4 170.815 167.586 3
 -9 6 3 145.17 203.112 4
 -9 6 3 131.059 159.768 3
 -9 6 2 2516.78 292.901 4
 -9 6 2 2352.16 253.546 3
 -9 6 1 -19.9316 188.069 4
 -9 6 1 87.5159 148.431 3
 -9 6 0 3994.8 347.96 4
 -9 6 0 3991.58 305.865 3
 -9 6 -1 3002.49 286.371 4
 -9 6 -1 3139.36 262.18 3
 -9 6 -2 2833.81 236.336 6
 -9 6 -2 3751.45 265.635 3
 -9 6 -3 582.557 163.131 4
 -9 6 -3 280.974 111.486 3
 -9 6 -3 201.49 120.053 6
 -9 6 -4 2675.78 222.673 4
 -9 6 -4 2370.1 197.318 6
 -9 6 -5 -19.1358 94.5317 4
 -9 6 -5 -70.5772 89.4298 6
 -9 7 12 111.067 73.9573 3
 -9 7 12 222.382 90.8684 7
 -9 7 11 647.215 121.145 3
 -9 7 11 970.682 146.67 7
 -9 7 10 1191.4 157.347 3
 -9 7 9 151.032 118.285 3
 -9 7 8 1832.35 232.604 4
 -9 7 8 1984.73 206.561 3
 -9 7 7 99.8194 170.711 4
 -9 7 7 -71.2444 124.372 3
 -9 7 6 5230.21 363.268 4
 -9 7 6 4396.59 311.555 3
 -9 7 5 -52.5434 158.773 4
 -9 7 5 43.9001 131.962 3
 -9 7 4 3139.94 292.613 4
 -9 7 4 2957.23 250.335 3
 -9 7 3 17.3476 165.27 4
 -9 7 3 -125.83 126.109 3
 -9 7 2 2548.95 269.984 4
 -9 7 2 2439.56 222.701 3
 -9 7 1 3533.46 294.071 4
 -9 7 1 3710.02 256.034 3
 -9 7 0 5030.25 331.271 4
 -9 7 0 4320.5 269.479 3
 -9 7 -1 301.744 146.128 4
 -9 7 -2 454.817 136.433 4
 -9 7 -3 68.6248 97.717 4
 -9 7 -4 113.715 70.9196 4
 -9 8 10 76.4266 91.4643 7
 -9 8 9 1455.17 163.084 7
 -9 8 8 49.8217 119.772 7
 -9 8 7 2171.22 214.16 7
 -9 8 6 -25.6461 123.868 4
 -9 8 5 4587.34 304.674 4
 -9 8 4 547.187 149.191 4
 -9 8 3 5626.17 335.142 4
 -9 8 2 168.806 126.826 4
 -9 8 1 3008.12 223.386 4
 -9 8 0 205.589 103.492 4
 -9 8 -1 856.01 118.83 4
 -9 9 7 74.9213 66.8929 7
 -9 9 6 844.456 103.318 7
 -9 9 5 -78.6847 69.4945 7
 -9 9 4 2224.33 152.334 7
 -10 0 13 40.4753 92.6897 3
 -10 0 12 -25.7509 113.016 3
 -10 0 11 75.5807 128.205 3
 -10 0 10 302.405 152.617 3
 -10 0 9 18.0993 141.104 3
 -10 0 8 15338.2 730.223 3
 -10 0 7 100.42 174.347 3
 -10 0 6 7269.24 419.345 4
 -10 0 6 7978.51 484.696 3
 -10 0 5 49.8066 135.705 4
 -10 0 5 213.504 189.502 3
 -10 0 4 4508.65 322.174 4
 -10 0 4 3863.1 355.265 3
 -10 0 3 -108.554 152.578 4
 -10 0 3 -199.531 185.808 3
 -10 0 2 3818.94 345.797 3
 -10 0 2 2875.75 283.014 4
 -10 0 1 179.83 216.215 3
 -10 0 0 5713.1 421.985 3
 -10 0 -1 43.3504 187.059 3
 -10 0 -2 13070.9 668.872 3
 -10 0 -3 135.017 167.466 3
 -10 0 -4 6744.95 419.041 3
 -10 0 -5 195.102 142.426 3
 -10 0 -6 9827.34 473.716 3
 -10 0 -7 62.7 90.0464 3
 -10 1 14 1281.28 143.093 3
 -10 1 13 -24.3283 107.952 3
 -10 1 12 1530.33 201.206 3
 -10 1 11 117.975 152.032 3
 -10 -1 10 3574.68 269.017 3
 -10 1 10 4137.28 327.525 3
 -10 1 9 2504.44 239.199 4
 -10 -1 9 2420.77 231.394 3
 -10 1 9 2708.69 284.527 3
 -10 1 8 9822.77 517.998 4
 -10 -1 8 9818.35 517.186 3
 -10 1 8 10762.8 577.859 3
 -10 1 7 2552.87 254.024 4
 -10 -1 7 2433.62 256.022 3
 -10 1 7 3158.88 313.04 3
 -10 1 6 109.289 145.214 4
 -10 -1 6 465.631 162.786 3
 -10 1 6 220.593 203.246 3
 -10 1 5 6261.87 416.397 4
 -10 -1 5 6542.19 419.596 3
 -10 1 5 6512.51 462.022 3
 -10 1 4 588.052 189.39 4
 -10 -1 4 538.922 182.833 3
 -10 1 4 595.12 220.869 3
 -10 1 3 4639.23 360.807 4
 -10 -1 3 3878.06 336.913 3
 -10 1 3 4236.06 381.576 3
 -10 1 2 69.8121 197.356 3
 -10 -1 2 62.3656 170.985 3
 -10 -1 2 236.979 140.24 4
 -10 1 2 -20.3754 161.101 4
 -10 1 1 9217.84 575.545 3
 -10 -1 1 10019.1 557.808 3
 -10 1 0 8195.21 521.239 3
 -10 -1 0 8011.81 491.925 3
 -10 1 -1 5378.55 415.675 3
 -10 -1 -1 4820.98 377.333 3
 -10 1 -2 1412.02 253.32 3
 -10 -1 -2 1226.19 226.071 3
 -10 1 -3 5836.31 410.745 3
 -10 -1 -3 5507.79 386.286 3
 -10 1 -4 174.99 174.462 3
 -10 -1 -4 162.934 148.572 3
 -10 -1 -5 4631.09 310.66 3
 -10 -1 -6 562.455 133.733 3
 -10 -1 -7 1447.35 136.149 3
 -10 2 14 29.9494 91.4427 3
 -10 2 13 2812.62 236.029 3
 -10 2 12 153.874 145.969 3
 -10 2 11 8770.89 446.161 7
 -10 2 11 10243.3 528.982 3
 -10 2 10 303.979 183.786 3
 -10 2 9 3644.44 297.061 4
 -10 2 9 3824.47 337.487 3
 -10 2 8 181.36 164.624 4
 -10 2 8 381.023 204.647 3
 -10 2 7 8056.54 478.539 4
 -10 2 7 7953.92 510.848 3
 -10 2 6 -59.4024 157.596 4
 -10 -2 6 -15.3976 116.611 3
 -10 2 6 270.887 205.702 3
 -10 2 5 511.465 213.667 4
 -10 -2 5 749.517 159.711 3
 -10 2 5 781.512 234.054 3
 -10 2 4 461.138 209.08 4
 -10 -2 4 170.779 136.243 3
 -10 2 4 395.23 215.304 3
 -10 2 3 1938.05 274.868 4
 -10 -2 3 1593.83 214.802 3
 -10 2 3 2382.32 303.281 3
 -10 2 2 3894.4 375.577 3
 -10 2 2 3574.29 349.782 4
 -10 -2 2 3779.05 306.631 3
 -10 -2 1 6026.03 395.897 3
 -10 -2 0 5721.11 381.344 3
 -10 -2 -1 2159.56 244.636 3
 -10 -2 -2 2751.45 264.212 3
 -10 -2 -3 -79.4985 140.355 3
 -10 2 -4 1730.94 223.123 3
 -10 -2 -4 2387.33 226.111 3
 -10 2 -5 647.584 158.777 3
 -10 -2 -5 855.102 150.284 3
 -10 2 -6 -110.933 106.169 3
 -10 -2 -6 109.42 94.6989 3
 -10 2 -7 488.868 97.1809 3
 -10 3 14 1802.99 168.725 3
 -10 3 13 50.1555 126.565 3
 -10 3 12 4148.62 262.059 7
 -10 3 12 4838.08 317.578 3
 -10 3 11 1536.78 221.771 3
 -10 3 11 1537.15 186.695 7
 -10 3 10 2071.22 254.486 3
 -10 3 9 5175.14 369.382 4
 -10 3 9 5935.92 414.381 3
 -10 3 8 4575.1 357.802 4
 -10 3 8 4693.33 375.293 3
 -10 3 7 197.942 173.82 4
 -10 3 7 108.422 202.692 3
 -10 3 6 7599.72 483.484 4
 -10 3 5 -21.0419 186.735 4
 -10 3 4 4712.14 390.879 4
 -10 3 3 1406.14 269.456 4
 -10 3 2 5269.84 418.618 4
 -10 3 1 177.213 204.981 3
 -10 3 1 42.6331 200.192 4
 -10 3 0 5552.75 409.924 3
 -10 -3 0 4921.95 323.655 3
 -10 3 -1 839.03 213.944 3
 -10 -3 -1 344.869 133.201 3
 -10 3 -2 1767.51 238.214 3
 -10 -3 -2 1332 176.373 3
 -10 3 -3 51.3678 163.128 3
 -10 -3 -3 98.7587 110.771 3
 -10 3 -4 311.589 148.26 3
 -10 -3 -4 349.351 112.639 3
 -10 3 -5 1798.91 184.919 3
 -10 -3 -5 1163.77 127.409 3
 -10 3 -6 207.066 95.5752 3
 -10 4 14 66.761 81.3755 3
 -10 4 13 1694.79 178.581 3
 -10 4 12 420.703 146.451 3
 -10 4 12 376.337 116.119 7
 -10 4 11 335.605 134.276 7
 -10 4 9 3606.18 317.152 4
 -10 4 8 148.852 183.063 4
 -10 4 7 9742.31 552.032 4
 -10 4 6 1716.35 256.895 4
 -10 4 6 1342.03 251.891 3
 -10 4 5 10808.1 601.825 4
 -10 4 5 10536.3 594.189 3
 -10 4 4 440.501 215.272 4
 -10 4 4 788.955 225.806 3
 -10 4 3 1596.97 267.615 4
 -10 4 3 1885.74 274.69 3
 -10 4 2 3293 335.763 4
 -10 4 2 3315.01 329.72 3
 -10 4 1 1120.52 252.49 4
 -10 4 1 1031.51 224.149 3
 -10 4 0 1718.55 245.499 3
 -10 4 -1 253.054 163.21 3
 -10 4 -2 312.507 148.673 3
 -10 4 -3 -57.6271 128.558 3
 -10 4 -4 5221.01 328.423 4
 -10 4 -4 5078.89 305.161 3
 -10 4 -5 330.803 118.524 4
 -10 4 -5 154.015 92.1016 3
 -10 4 -6 3499.6 202.577 4
 -10 5 12 705.618 141.332 3
 -10 5 12 594.052 112.614 7
 -10 5 11 940.082 164.093 3
 -10 5 11 671.743 147.32 7
 -10 5 10 1932.84 217.774 3
 -10 5 10 1854.2 209.754 7
 -10 5 9 2694.3 261.087 4
 -10 5 9 2818.69 267.745 3
 -10 5 8 568.941 197.965 4
 -10 5 8 432.299 181.723 3
 -10 5 7 1326.14 233.379 4
 -10 5 7 1169.59 217.008 3
 -10 5 6 827.81 212.019 4
 -10 5 6 811.98 211.504 3
 -10 5 5 1729.25 254.762 4
 -10 5 5 1617.23 242.203 3
 -10 5 4 188.096 180.961 3
 -10 5 3 5099.88 367.132 3
 -10 5 2 18.0363 152.032 3
 -10 5 1 3204.23 285.977 3
 -10 5 0 958.54 218.479 4
 -10 5 0 692.982 174.54 3
 -10 5 -1 1000.05 196.96 4
 -10 5 -1 688.69 166.517 3
 -10 5 -2 390.639 162.906 4
 -10 5 -2 461.522 142.041 3
 -10 5 -3 2107.26 206.935 4
 -10 5 -3 1816.22 171.869 3
 -10 5 -4 80.9225 106.834 4
 -10 5 -4 210.445 86.9922 3
 -10 5 -5 4073.5 219.788 4
 -10 6 12 -77.3279 74.3946 3
 -10 6 11 805.891 131.43 3
 -10 6 11 577.493 117.777 7
 -10 6 10 887.519 147.991 3
 -10 6 10 914.771 151.35 7
 -10 6 9 206.544 127.701 3
 -10 6 8 2855.24 248.926 3
 -10 6 7 72.9731 133.696 3
 -10 6 6 1801.53 213.774 3
 -10 6 5 136.251 140.139 3
 -10 6 4 3128.04 293.147 4
 -10 6 4 3730.01 277.364 3
 -10 6 3 -33.0243 172.847 4
 -10 6 3 73.5909 129.192 3
 -10 6 2 9606.53 505.665 4
 -10 6 2 9355.31 474.606 3
 -10 6 1 183.192 154.83 4
 -10 6 1 169.482 127.781 3
 -10 6 0 1968.91 217.234 4
 -10 6 0 1812.01 184.174 3
 -10 6 -1 305.42 133.294 4
 -10 6 -1 69.6776 93.1334 3
 -10 6 -2 3882.34 242.409 4
 -10 6 -2 2424.12 172.185 3
 -10 6 -3 96.3573 96.289 4
 -10 7 10 1359.54 137.772 7
 -10 7 9 -32.8794 85.3743 3
 -10 7 8 1150.14 140.247 3
 -10 7 7 1259.88 171.288 4
 -10 7 7 918.473 135.321 3
 -10 7 6 421.848 143.806 4
 -10 7 6 537.111 116.972 3
 -10 7 5 1304.94 183.928 4
 -10 7 5 1012.84 139.382 3
 -10 7 4 651.411 153.116 4
 -10 7 4 694.37 125.479 3
 -10 7 3 1563.11 192.932 4
 -10 7 3 898.683 130.316 3
 -10 7 2 169.232 126.623 4
 -10 7 2 135.973 87.3329 3
 -10 7 1 290.15 121.66 4
 -10 7 0 178.117 104.549 4
 -10 7 -1 148.746 89.2952 4
 -10 8 7 1852.42 148.772 7
 -10 8 6 -43.932 82.5161 7
 -10 8 5 764.272 116.11 4
 -10 8 4 99.1356 83.7927 4
 -10 8 3 272.895 95.5729 4
 -10 8 2 6.97068 76.3106 4
 -11 0 11 50.4373 89.535 3
 -11 0 10 5874.59 333.086 3
 -11 0 9 -27.7941 117.847 3
 -11 0 8 2010.98 218.191 3
 -11 0 7 32.6682 135.176 3
 -11 0 6 2832.83 262.298 3
 -11 0 5 447 178 3
 -11 0 4 3379.33 304.898 3
 -11 0 3 -13.6434 119.769 4
 -11 0 3 -128.937 156.205 3
 -11 0 2 13647.1 617.861 4
 -11 0 2 13966.8 667.588 3
 -11 0 1 -13.8404 121.483 4
 -11 0 1 35.6499 162.427 3
 -11 0 0 6515.57 371.403 4
 -11 0 0 6566.2 405.785 3
 -11 0 -1 -63.7951 143.843 3
 -11 0 -1 -75.2218 118.881 4
 -11 0 -2 8025.14 407.714 4
 -11 0 -2 8929.13 452.432 3
 -11 0 -3 162.375 128.726 3
 -11 0 -3 67.2895 92.056 4
 -11 0 -4 7446.08 333.042 4
 -11 0 -4 7351.97 364.515 3
 -11 0 -5 7.35206 69.0358 3
 -11 1 12 1309.18 147.414 3
 -11 1 11 576.285 136.435 3
 -11 1 10 460.38 142.774 3
 -11 1 9 5038.86 335.948 3
 -11 -1 8 691.245 139.501 3
 -11 1 8 734.299 183.493 3
 -11 1 7 3325.04 251.489 4
 -11 -1 7 3490.11 261.046 3
 -11 1 7 3385.65 293.66 3
 -11 1 6 267.252 135.379 4
 -11 -1 6 104.26 131.594 3
 -11 1 6 185.41 159.197 3
 -11 1 5 3288.98 269.127 4
 -11 -1 5 3474.05 276.81 3
 -11 1 5 3785.15 313.648 3
 -11 1 4 139.373 136.007 4
 -11 -1 4 48.4415 130.325 3
 -11 1 4 328.077 175.918 3
 -11 1 3 4352.51 322.918 4
 -11 -1 3 4825.18 329.517 3
 -11 1 3 4680.4 355.866 3
 -11 1 2 15.8951 145.625 4
 -11 -1 2 131.331 144.931 3
 -11 1 2 190.654 175.545 3
 -11 1 1 4852.97 330.542 4
 -11 -1 1 4119.59 315.49 3
 -11 1 1 4585.68 349.97 3
 -11 -1 0 1357.27 190.539 3
 -11 1 0 1496.42 227.528 3
 -11 1 0 1182.73 202.089 4
 -11 1 -1 3195.02 295.216 3
 -11 1 -1 3520.55 271.703 4
 -11 -1 -1 4091.1 285.522 3
 -11 1 -2 398.785 146.366 3
 -11 -1 -2 272.476 129.258 3
 -11 1 -2 415.271 140.196 4
 -11 1 -3 2692.28 211.893 4
 -11 1 -3 2691.26 232.176 3
 -11 -1 -3 2679.62 209.436 3
 -11 1 -4 911.146 136.409 3
 -11 -1 -4 1066.75 127.013 3
 -11 1 -4 793.518 119.454 4
 -11 1 -5 2187.92 153.996 3
 -11 2 13 645.05 99.9129 3
 -11 2 12 467.676 120.68 3
 -11 2 11 568.961 139.159 3
 -11 2 10 -14.4821 127.82 3
 -11 2 9 4807.85 336.258 3
 -11 2 8 808.063 163.04 4
 -11 2 8 751.913 184.799 3
 -11 2 7 1158.51 183.092 4
 -11 2 7 1044.71 207.283 3
 -11 2 6 560.338 162.966 4
 -11 2 6 751.602 203.791 3
 -11 2 5 64.9676 151.023 4
 -11 2 5 -57.5683 169.367 3
 -11 2 4 1717.62 216.407 4
 -11 -2 4 1401.76 171.418 3
 -11 2 4 1664.72 246.193 3
 -11 2 3 1382.45 208.874 4
 -11 -2 3 975.872 156.577 3
 -11 2 3 1058.84 213.798 3
 -11 2 2 2612.14 264.647 4
 -11 -2 2 2346.29 216.625 3
 -11 2 2 2872.27 284.943 3
 -11 2 1 212.014 156.895 4
 -11 -2 1 210.092 117.899 3
 -11 2 1 18.2135 165.19 3
 -11 2 0 5825.47 370.193 4
 -11 -2 0 5699.48 331.455 3
 -11 2 0 5934.9 388.59 3
 -11 -2 -1 139.402 109.77 3
 -11 2 -1 258.234 146.128 4
 -11 -2 -2 543.36 121.423 3
 -11 2 -2 820.757 160.559 4
 -11 -2 -3 992.5 123.527 3
 -11 2 -3 1434.23 164.759 4
 -11 2 -4 946.188 126.158 4
 -11 3 13 756.568 103.147 3
 -11 3 12 1513.84 160.47 3
 -11 3 11 170.625 122.096 3
 -11 3 10 3109.18 223.432 7
 -11 3 10 3678.14 275.653 3
 -11 3 9 384.255 164.48 3
 -11 3 8 4329.84 302.877 4
 -11 3 8 4189.67 323.736 3
 -11 3 7 30.3087 138.106 4
 -11 3 7 104.075 158.887 3
 -11 3 6 1659.26 210.829 4
 -11 3 6 1191.02 215.639 3
 -11 3 5 1072.69 194.018 4
 -11 3 5 882.316 219.514 3
 -11 3 4 117.581 160.052 4
 -11 3 3 33.661 158.041 4
 -11 3 2 1307.27 212.556 4
 -11 3 1 319.429 164.216 4
 -11 3 0 285.794 155.358 4
 -11 3 0 394.864 168.885 3
 -11 3 -1 865.401 169.233 4
 -11 3 -1 758.411 161.593 3
 -11 3 -2 72.6426 120.218 4
 -11 3 -2 224.845 125.1 3
 -11 3 -3 -60.7072 105.91 4
 -11 3 -3 61.7468 107.303 3
 -11 3 -4 92.9194 76.8641 4
 -11 3 -4 53.7675 73.5499 3
 -11 4 12 129.24 86.6969 3
 -11 4 11 546.686 124.588 3
 -11 4 11 740.217 99.5435 7
 -11 4 10 2498.31 200.217 7
 -11 4 10 2985.78 237.322 3
 -11 4 8 2206.54 220.508 4
 -11 4 7 989.701 180.533 4
 -11 4 6 4398.6 319.714 4
 -11 4 5 737.696 185.94 4
 -11 4 5 795.065 197.239 3
 -11 4 4 4744.99 342.743 4
 -11 4 4 5444.95 357.694 3
 -11 4 3 456.983 173.041 4
 -11 4 3 762.879 171.726 3
 -11 4 2 2951.85 268.649 4
 -11 4 2 2762.12 256.432 3
 -11 4 1 160.971 156.154 4
 -11 4 1 -14.6892 139.935 3
 -11 4 0 978.274 169.806 4
 -11 4 0 1129.25 170.823 3
 -11 4 -1 414.75 140.104 4
 -11 4 -1 319.69 128.302 3
 -11 4 -2 669.408 139.053 4
 -11 4 -2 474.669 114.597 3
 -11 4 -3 584.877 95.7673 3
 -11 5 11 1387.18 138.572 3
 -11 5 10 699.076 129.362 3
 -11 5 10 589.397 109.413 7
 -11 5 9 4389.44 264.257 7
 -11 5 9 3486.81 250.812 3
 -11 5 8 35.9402 119.894 4
 -11 5 8 -49.5735 121.351 3
 -11 5 7 3203.45 251.009 4
 -11 5 7 2621.99 234.985 3
 -11 5 6 285.064 147.877 4
 -11 5 6 324.827 136.967 3
 -11 5 5 2868.23 253.706 4
 -11 5 5 3144.5 252.992 3
 -11 5 4 516.81 151.048 4
 -11 5 4 489.625 150.319 3
 -11 5 3 8670.51 440.274 4
 -11 5 3 7727.94 417.442 3
 -11 5 2 312.575 135.783 3
 -11 5 1 1717.6 179.453 3
 -11 5 0 895.243 132.216 3
 -11 5 -1 405.259 95.2614 3
 -11 5 -2 329.601 91.3211 4
 -11 6 9 550.573 98.7708 3
 -11 6 9 573.471 97.426 7
 -11 6 8 1269.56 135.37 3
 -11 6 8 1148.24 139.261 7
 -11 6 7 -134.494 113.259 4
 -11 6 7 114.145 95.1955 3
 -11 6 6 2816.6 200.973 3
 -11 6 5 -39.6422 97.0487 3
 -11 6 4 5204.12 285.643 3
 -11 6 3 671.843 114.497 3
 -11 6 2 7351.77 340.788 4
 -11 6 2 5396.14 289.205 3
 -11 6 1 1162.51 138.619 4
 -11 6 0 1623.81 142.324 4
 -11 7 5 904.356 109.373 4
 -11 7 4 88.1853 74.2264 4
 -12 0 8 2120.34 169.87 3
 -12 0 7 10.3914 103.103 3
 -12 0 6 3396.36 239.634 3
 -12 0 5 153.424 117.711 3
 -12 0 4 4292.75 278.298 3
 -12 0 3 59.8143 113.971 3
 -12 0 2 6990.47 366.781 3
 -12 0 1 -21.6317 101.069 3
 -12 0 0 1001.45 134.685 3
 -12 0 -1 -98.8321 80.7079 3
 -12 1 10 101.006 76.149 3
 -12 1 9 3267.11 219.21 3
 -12 1 8 238.747 108.884 3
 -12 1 7 1243.52 161.665 3
 -12 1 6 501.544 136.766 3
 -12 1 5 1328.69 177.912 3
 -12 -1 4 406.189 106.923 3
 -12 1 4 302.316 135.95 3
 -12 -1 3 2648.89 196.638 3
 -12 1 3 2808.44 229.866 3
 -12 1 2 42.6612 78.9464 4
 -12 -1 2 -37.8032 94.585 3
 -12 1 2 99.3389 122.669 3
 -12 1 1 974.35 119.329 4
 -12 -1 1 1090.79 129.19 3
 -12 1 1 1170.29 160.933 3
 -12 1 0 323.249 79.8341 4
 -12 -1 0 271.232 82.1523 3
 -12 1 0 489.521 120.075 3
 -12 1 -1 212.946 89.0671 3
 -12 2 10 841.634 120.362 3
 -12 2 9 10.0971 95.7276 3
 -12 2 8 1171.7 157.195 3
 -12 2 7 461.717 136.203 3
 -12 2 6 89.4389 79.831 4
 -12 2 6 12.7224 121.78 3
 -12 2 5 1704 168.373 4
 -12 2 5 2542.26 219.51 3
 -12 2 4 1541.08 161.778 4
 -12 2 4 1762.68 194.356 3
 -12 2 3 2625.37 201.923 4
 -12 2 3 2777 232.555 3
 -12 2 2 470.796 117.097 4
 -12 2 2 574.998 145.029 3
 -12 2 1 901.754 127.136 4
 -12 2 1 837.336 141.389 3
 -12 2 0 1165.24 123.638 4
 -12 2 0 1428.01 151.938 3
 -12 2 -1 860.162 115.966 3
 -12 3 10 643.348 104.945 3
 -12 3 9 -9.55815 94.4219 3
 -12 3 8 63.8361 106.041 3
 -12 3 7 94.38 87.1013 4
 -12 3 7 263.193 119.417 3
 -12 3 6 56.5764 88.9965 4
 -12 3 6 83.5329 116.866 3
 -12 3 5 655.873 130.716 4
 -12 3 5 900.639 158.751 3
 -12 3 4 727.951 132.798 4
 -12 3 4 741.128 145.929 3
 -12 3 3 39.8738 101.041 4
 -12 3 2 503.612 111.374 4
 -12 3 1 408.445 99.3704 4
 -12 3 0 489.097 96.5273 4
 -12 4 9 -7.96545 72.5843 3
 -12 4 7 136.583 84.2179 4
 -12 4 6 2294.04 175.472 4
 -12 4 5 439.098 107.346 4
 -12 4 4 7047.19 341.814 4
 -12 4 4 6826.47 348.244 3
 -12 4 3 161.097 98.3348 4
 -12 4 3 -58.1636 99.0742 3
 -12 4 2 2332.79 171.919 4
 -12 4 2 2240.55 174.513 3
 -12 4 1 1332.49 126.667 4
 -12 4 1 1213.99 124.324 3
 -12 5 7 2048.56 147.503 3
 -12 5 6 189.783 77.4349 4
 -12 5 6 163.179 72.8517 3
 -12 5 5 1841.08 148.556 4
 -12 5 5 2267.34 155.381 3
 -12 5 4 29.2209 73.121 4
 -12 5 4 50.2351 67.0715 3
 -12 5 3 1817.71 140.071 4

_iucr_refine_instructions_details
;

    ymh-cu.res created by SHELXL-2014/7

TITL ymh-cu_a.res in P2(1)/c
CELL 1.54184 10.486201 10.537409 15.044893 90 106.838 90
ZERR 4 0.000248 0.000321 0.000408 0 0.0026 0
LATT 1
SYMM -X,0.5+Y,0.5-Z
SFAC C H Cu F N O
UNIT 52 24 4 4 4 16
 
L.S. 50
PLAN  5
SIZE 0.06 0.04 0.03
TEMP 25
BOND $H
LIST 4
more -3
CONF
fmap 2
acta
SHEL 999 0.837
REM <olex2.extras>
REM <HklSrc "%.\\ymh-Cu.hkl">
REM </olex2.extras>
 
WGHT    0.048100    1.096800
FVAR       2.81972
CU01  3    0.907858    1.088398    0.488687    11.00000    0.01491    0.03284 =
         0.02451    0.00036    0.00181    0.00063
O002  6    0.977149    0.639447    0.888066    11.00000    0.02616    0.04975 =
         0.03217    0.01138   -0.00250   -0.00546
O003  6    0.817197    0.493588    0.870784    11.00000    0.02750    0.04787 =
         0.03372    0.01235   -0.00191   -0.00409
O004  6    0.970329    0.830094    0.572428    11.00000    0.02519    0.04794 =
         0.05004    0.01280    0.01455   -0.00096
O005  6    0.807349    0.974591    0.546765    11.00000    0.02422    0.04812 =
         0.05037    0.01458    0.01324    0.00154
N006  5    0.221479    0.747003    0.534020    11.00000    0.01763    0.03623 =
         0.04259    0.00128    0.00149    0.00210
F007  4    0.196076    0.411604    0.551356    11.00000    0.04419    0.04000 =
         0.20473    0.00354    0.00951   -0.01170
C008  1    0.868806    0.588747    0.845031    11.00000    0.02261    0.04083 =
         0.02743    0.00462    0.00672    0.00478
C009  1    0.860734    0.871252    0.577771    11.00000    0.02349    0.04368 =
         0.02635    0.00629    0.00171   -0.00377
C00A  1    0.788316    0.787560    0.627522    11.00000    0.01932    0.04488 =
         0.03204    0.00792    0.00476   -0.00106
C00B  1    0.859010    0.726827    0.708451    11.00000    0.01669    0.04934 =
         0.03296    0.00627    0.00306   -0.00238
AFIX  43
H00B  2    0.950320    0.739844    0.732128    11.00000   -1.20000
AFIX   0
C00C  1    0.440825    0.661090    0.596670    11.00000    0.01709    0.03960 =
         0.03886    0.00792    0.00164    0.00021
C00D  1    0.586958    0.683901    0.635531    11.00000    0.01708    0.04242 =
         0.03465    0.00730    0.00139   -0.00008
C00E  1    0.650981    0.768106    0.592059    11.00000    0.01950    0.04953 =
         0.03292    0.01264    0.00237    0.00065
AFIX  43
H00E  2    0.602616    0.811682    0.539300    11.00000   -1.20000
AFIX   0
C00F  1    0.794707    0.647354    0.753928    11.00000    0.02300    0.04285 =
         0.02778    0.00716    0.00370    0.00270
C00G  1    0.659145    0.623870    0.716776    11.00000    0.01978    0.04404 =
         0.03559    0.01201    0.00719    0.00061
AFIX  43
H00G  2    0.616568    0.567685    0.746466    11.00000   -1.20000
AFIX   0
C00H  1    0.353732    0.760705    0.567050    11.00000    0.02079    0.03798 =
         0.03767    0.00207    0.00375   -0.00284
AFIX  43
H00H  2    0.388870    0.842174    0.570187    11.00000   -1.20000
AFIX   0
C00I  1    0.170809    0.630913    0.528886    11.00000    0.01708    0.04339 =
         0.07494   -0.00492    0.00255   -0.00366
AFIX  43
H00I  2    0.079258    0.619407    0.505305    11.00000   -1.20000
AFIX   0
C00J  1    0.387192    0.540689    0.591930    11.00000    0.02657    0.03860 =
         0.08220    0.01010    0.00379    0.00560
AFIX  43
H00J  2    0.441297    0.470053    0.611262    11.00000   -1.20000
AFIX   0
C00K  1    0.251047    0.528725    0.557655    11.00000    0.02802    0.03525 =
         0.09775   -0.00270    0.00595   -0.00505
HKLF 4
 
REM  ymh-cu_a.res in P2(1)/c
REM R1 =  0.0407 for    2263 Fo > 4sig(Fo)  and  0.0544 for all    2816 data
REM    181 parameters refined using      0 restraints
 
END  
     
WGHT      0.0481      1.0964 

REM Highest difference peak  0.303,  deepest hole -0.408,  1-sigma level  0.066
Q1    1   1.2620  0.7242  0.7974  11.00000  0.05    0.30
Q2    1   0.6842  0.2374  0.7003  11.00000  0.05    0.29
Q3    1   0.8783  0.9897  0.5279  11.00000  0.05    0.28
Q4    1   0.0863  0.5823  0.6264  11.00000  0.05    0.28
Q5    1   1.0790  0.9019  0.7222  11.00000  0.05    0.28

  REM The information below was added by Olex2.
  REM
  REM R1 = 0.0407 for 2263 Fo > 4sig(Fo) and 0.0544 for all 7003 data
  REM n/a parameters refined using n/a restraints
  REM Highest difference peak 0.30, deepest hole -0.41
  REM Mean Shift 0, Max Shift 0.000.

  REM +++ Tabular Listing of Refinement Information +++
  REM R1_all = 0.0544
  REM R1_gt = 0.0407
  REM wR_ref = 0.1070
  REM GOOF = 1.044
  REM Shift_max = 0.000
  REM Shift_mean = 0
  REM Reflections_all = 7003
  REM Reflections_gt = 2263
  REM Parameters = n/a
  REM Hole = -0.41
  REM Peak = 0.30
  REM Flack = n/a

  
;
_olex2_submission_special_instructions  'No special instructions were received'
_oxdiff_exptl_absorpt_empirical_details
;
Empirical correction (ABSPACK) includes:
- Absorption correction using spherical harmonics
- Frame scaling
- Detector area scaling
;
_oxdiff_exptl_absorpt_empirical_full_max  1.135
_oxdiff_exptl_absorpt_empirical_full_min  0.917
